# Supplementary material for: A gene regulatory network for neural induction
Source: eLife. 2023 Mar 3;12:e73189. doi: 10.7554/eLife.73189 (PMC10038663; doi:10.7554/eLife.73189)
Supplement: Figure 1—source data 1. [file elife-73189-fig1-data1.xlsx]

## Sheet: Suppl Table S15
Supplementary Table S15. RNAseq galGal3 analysis key
Differentially expressed transcripts were identified by performing Cufflinks and DESeq analysis on RNAseq data aligned to the galGal3 chicken genome
Column A	Chromosome locus of transcript alignment
Column B	Cufflinks analysis log2 fold change
Column C	Cufflinks analysis p-value
Column D	DESeq analysis log2 fold change
Column E	DESeq analysis p-value
Column F	Colour coded (see below)
Column G	Ensembl ID
Column H	Gene Symbol
Column I	Gene Description
Column J	Time point of identification
Column K	Up/down Regulation
Colour Codes
	Transcript significant at log2 fold change of ≥1.2 and p-value of <0.05 in either Cufflinks or DESeq
	Differentially expressed genes commonly identified by Cufflinks and DESeq using log2 fold change cut-off of ≥1.2 and p-value <0.05
	Differentially expressed genes identified by one or the other (Cufflinks or DESeq) using same cut-offs as above
	Genes commonly identified by Cufflinks and DESeq by ignoring p-value but using log2 fold change cut-off of ≥1.2
	Transcriptional regulators

## Sheet: Suppl Table S16
Supplementary Table S16. RNAseq galGal3 differentially expressed transcripts
Chromosome Locus	log2 Fold Change	P- Value	log2 Fold Change	P- Value		Ensembl ID	Gene Symbol	Gene Description	Time point	Regulation
chr1:37302347-37305118	2.11798	0.00410742	2.18084	0.00172456		ENSGALG00000009959/ENSGALG00000009964	RAB3IP/YEATS4	RAB3A_interacting_protein_(rabin3)/YEATS_domain_containing_4	5hrs	UP
chr1:45170087-45175062	8.39904	0.00440877	8.07094	6.73e-13		-	DUSP6	dual_specificity_phosphatase_6	5hrs	UP
chr1:49861123-49870808	2.04845	0.0116814	2.06819	0.0253451		ENSGALG00000011738	ARHGDIB	Rho_GDP_dissociation_inhibitor_(GDI)_beta	5hrs	UP
chr1:76561966-76567840	4.28451	0.000201597	4.23116	0.000460492		ENSGALG00000017272	VWF	von_Willebrand_factor	5hrs	UP
chr1:95179705-95214528	1.78207	0.0247568	1.84212	0.0120271		ENSGALG00000015458	ILDR2	chromosome_1_open_reading_frame_32	5hrs	UP
chr1:95179705-95214528	4.01136	0.00151416	7.06819	0.00041569		ENSGALG00000016837	MYO16	myosin_XVI	5hrs	UP
chr1:142521954-142598193	4.4264	0.00174462	6.84212	0.00135973		ENSGALG00000016837	MYO16	myosin_XVI	5hrs	UP
chr1:145424588-145444330	5.71717	7.3e-05	6.13129	6.57e-10		-	-	-	5hrs	UP
chr1:156881807-156890287	3.3524	0.00061802	3.46582	0.0109405		ENSGALG00000016906	SPRY2	sprouty_homolog_2_(Drosophila)	5hrs	UP
chr1:157998668-158014415	6.35621	2.61e-05	6.71307	6.42e-20		ENSGALG00000016912	EDNRB	endothelin_receptor_type_B	5hrs	UP
chr1:168522457-168543205	3.96218	3.08e-07	4.08762	8.13e-11		-	-	-	5hrs	UP
chr1:1011480-1036743	2.11749	0.00325229	2.18836	0.000107763		ENSGALG00000008437	NET1	neuroepithelial_cell_transforming_gene_1	5hrs	UP
chr1:32129253-32250978	3.84786	0.00100687	3.97023	0.00492548		ENSGALG00000009601	NELL2	NEL-like_2_(chicken)	5hrs	UP
chr1:33519635-33563467	4.84502	0.000177627	5.04759	2.36e-10		ENSGALG00000009755	LRIG3	leucine-rich_repeats_and_immunoglobulin-like_domains_3	5hrs	UP
chr1:37736145-37747494	4.85335	0.00279937	5.73521	0.00433718		ENSGALG00000010049	PTPRB	protein_tyrosine_phosphatase,_receptor_type,_B	5hrs	UP
chr1:43618866-43625449	7.0967	6.82e-09	6.97581	5.37e-18		-	LOC772233	protein_tyrosine_phosphatase,_receptor_type,_B	5hrs	UP
chr1:45170087-45175062	5.9199	7.15e-05	8.27078	1.81e-14		-	DUSP6	dual_specificity_phosphatase_6	5hrs	UP
chr1:45275390-45333756	3.08581	0.000219935	3.08615	1.91e-13		ENSGALG00000011258	ATP2B1	ATPase,_Ca++_transporting,_plasma_membrane_1	5hrs	UP
chr1:47451358-47466522	3.22002	4.26e-05	3.37608	2.2e-10		ENSGALG00000011400	USP44	ubiquitin_specific_peptidase_44	5hrs	UP
chr1:56432954-56588306	3.06953	0.00196203	3.3104	0.0066344		ENSGALG00000012698	CHST11	carbohydrate_(chondroitin_4)_sulfotransferase_11	5hrs	UP
chr1:58435735-58473447	1.95822	0.00455386	2.03392	3.11e-05		ENSGALG00000012823	TRIM24	tripartite_motif-containing_24	5hrs	UP
chr1:63990397-64008993	1.78834	0.00964354	1.81623	0.00164331		ENSGALG00000013039	BID	BH3_interacting_domain_death_agonist	5hrs	UP
chr1:91154497-91164218	5.18126	3.3e-05	5.18741	2.48e-05		-	-	-	5hrs	UP
chr1:101714058-101780137	2.30433	0.00330328	2.34205	4.91e-05		ENSGALG00000015681	NRIP1	nuclear_receptor_interacting_protein_1	5hrs	UP
chr1:105284217-105288443	3.33447	0.000884127	3.3758	0.000515673		-	-	-	5hrs	UP
chr1:164531888-164545461	3.24706	0.0026201	3.42945	0.000435876		-	-	-	5hrs	UP
chr1:164545718-164549914	3.87028	0.00157419	4.39417	3.38e-06		-	-	-	5hrs	UP
chr1:49392080-49395199	4.31889	4.68e-09	4.62525	2.1e-26		ENSGALG00000011614	ANO4	Anoctamin	5hrs	UP
chr1:49395315-49396199	4.22514	3.22e-07	4.55643	3.05e-19		ENSGALG00000011614	ANO4	Anoctamin	5hrs	UP
chr1:74839949-74842450	6.58879	2.79e-09	6.58765	1.47e-15		-	-	-	5hrs	UP
chr1:74874312-74877457	6.09882	5e-05	6.14329	0.00059885		-	-	-	5hrs	UP
chr1:76118589-76121122	6.27815	0.000365245	6.30155	0.0122178		-	-	-	5hrs	UP
chr1:103054202-103057469	7.24018	3.2e-05	7.27317	0.000120516		-	-	-	5hrs	UP
chr1:103390513-103392554	6.58122	0.000174062	6.61973	0.00370625		-	-	-	5hrs	UP
chr1:105099609-105100289	4.66957	2.78e-05	4.99766	2.27e-08		-	-	-	5hrs	UP
chr1:105100442-105103859	4.16039	1.6e-08	4.45735	3.36e-25		-	-	-	5hrs	UP
chr1:108319708-108320018	3.63585	0.011753	4.84212	0.0206889		-	-	-	5hrs	UP
chr1:120852723-120853388	3.70212	2.55e-05	4.17954	3.23e-09		-	-	-	5hrs	UP
chr1:123033971-123034330	4.50321	0.00374259	4.87271	0.00197914		-	-	-	5hrs	UP
chr1:123034383-123034557	4.31057	5.51e-06	4.42708	4.64e-12		-	-	-	5hrs	UP
chr1:134745978-134748885	3.87963	1.04e-06	4.25895	2.02e-17		-	-	-	5hrs	UP
chr1:146889584-146889916	3.62017	0.000790691	4.8127	2.19e-09		-	-	-	5hrs	UP
chr1:153084341-153085528	4.56036	2.5e-07	4.6368	2.53e-16		-	-	-	5hrs	UP
chr1:160721711-160722153	4.58122	0.000485855	5.03477	0.0108119		-	-	-	5hrs	UP
chr1:160723584-160726697	6.79926	1.15e-07	7.24097	1.2e-10		-	-	-	5hrs	UP
chr1:160726798-160728085	4.91825	0.000423212	5.54256	0.00922573		-	-	-	5hrs	UP
chr1:164528737-164531689	3.49965	0.00163395	3.69298	0.0309293		-	-	-	5hrs	UP
chr1:164771414-164771819	5.73928	0.0012543	5.09366	0.000172493		-	-	-	5hrs	UP
chr1:164856838-164858679	5.75552	2.68e-06	5.19426	2.77e-13		-	-	-	5hrs	UP
chr1:166128059-166128336	3.51386	0.00428284	4.61597	1.92e-06		-	-	-	5hrs	UP
chr1:167197530-167197832	4.36891	0.000940956	4.07039	0.0401039		-	-	-	5hrs	UP
chr1:167489462-167491412	4.50961	0.000301124	4.88026	0.0057476		-	-	-	5hrs	UP
chr1:168781444-168782473	4.37126	5.64e-06	4.28269	1.65e-08		-	-	-	5hrs	UP
chr10:12798806-12842118	2.95281	0.00103395	2.89895	0.0058904		ENSGALG00000006008	HOMER2	homer_homolog_2_(Drosophila)	5hrs	UP
chr10:16392994-16399562	3.65837	0.0463305	4.33593	0.00470675		ENSGALG00000006967	RGMA	RGM_domain_family,_member_A	5hrs	UP
chr11:13161326-13257246	5.05909	0.0182591	4.14747	0.00208854		ENSGALG00000005278	CDH11	cadherin_11,_type_2,_OB-cadherin_(osteoblast)	5hrs	UP
chr11:15337599-15395648	2.90714	0.00113253	2.97218	1.58e-07		ENSGALG00000013225	VAT1L	vesicle_amine_transport_protein_1_homolog_(T._californica)-like	5hrs	UP
chr11:6748575-6751882	4.45098	7.89e-07	4.47439	8.74e-07		-	-	-	5hrs	UP
chr12:6714366-6754862	2.94334	0.00159376	3.07185	0.00788233		ENSGALG00000005210	WNK2	WNK_lysine_deficient_protein_kinase_2	5hrs	UP
chr12:8783237-8825218	3.49194	0.000526909	3.52922	4.07e-05		ENSGALG00000005499	IL17RD	interleukin_17_receptor_D	5hrs	UP
chr13:15684188-15691454	1.73452	0.0267331	1.81783	0.0428871		ENSGALG00000006346	CXCL14	chemokine_(C-X-C_motif)_ligand_14	5hrs	UP
chr13:17558116-17566379	2.4377	0.00352289	2.50725	0.00387755		ENSGALG00000023812	CCNI2	cyclin_I_family,_member_2	5hrs	UP
chr13:10287044-10298375	2.29497	0.000967245	2.34135	3.82e-05		-	-	-	5hrs	UP
chr13:10307715-10351265	2.5194	0.00725597	2.33274	3.72e-06		ENSGALG00000002971	NSD1	nuclear_receptor_binding_SET_domain_protein_1	5hrs	UP
chr13:17537579-17556539	1.68931	0.0469317	1.86971	0.014202		ENSGALG00000006860	KIF3A	kinesin_family_member_3A	5hrs	UP
chr13:17758121-17763082	2.89786	0.000437428	3.01789	0.000789072		ENSGALG00000007312	GNPDA1	glucosamine-6-phosphate_deaminase_1	5hrs	UP
chr13:18592768-18623819	2.15342	0.00143145	2.14474	0.000270585		ENSGALG00000007582	DPYSL3	dihydropyrimidinase-like_3	5hrs	UP
chr14:10250577-10285715	1.84912	0.0175023	1.82642	0.0109639		ENSGALG00000007313	CARHSP1	Calcium_regulated_heat_stable_protein_1,_24kDa	5hrs	UP
chr15:8620404-8626575	6.04478	5.9e-05	6.18451	0.000474517		ENSGALG00000006501	GGT5	Gamma-Glutamyl Cleaving Enzyme	5hrs	UP
chr15:9620407-9630429	3.84465	7.81e-07	3.80004	6.95e-10		ENSGALG00000007227	MSI1	musashi_homolog_1_(Drosophila)	5hrs	UP
chr18:3969564-4041381	3.55075	2.81e-05	3.6009	5.06e-09		ENSGALG00000001684	SEC14L1	SEC14-like_1_(S._cerevisiae)	5hrs	UP
chr18:4256204-4268491	3.32005	0.000214173	3.41255	9.01e-05		-	MXRA7	matrix-remodelling_associated_7	5hrs	UP
chr18:10299220-10334658	1.73894	0.0307804	1.72991	0.0135451		-	-	-	5hrs	UP
chr19:4724704-4731664	4.77285	0.0295715	5.26358	0.0232189		-	LOC417532	similar_to_hypothetical_protein_LOC124842	5hrs	UP
chr2:1237320-1370081	2.93526	0.0102187	2.9823	0.0180161		ENSGALG00000005223	ADCYAP1R1	adenylate_cyclase_activating_polypeptide_1_(pituitary)_receptor_type_I	5hrs	UP
chr2:4491462-4523065	2.32871	0.00298674	2.39298	5.68e-06		ENSGALG00000005763	VILL	villin-like	5hrs	UP
chr2:23530765-23569737	6.86934	8.43e-05	6.71425	1.25e-05		ENSGALG00000009641	COL1A2	collagen,_type_I,_alpha_2	5hrs	UP
chr2:69693352-69741491	4.20331	7.28e-08	4.25877	7.95e-12		ENSGALG00000012904	RNF152	ring_finger_protein_152	5hrs	UP
chr2:72991796-73002095	4.79996	5.16e-05	4.87787	1.65e-27		-	ENS-3	pol-like_protein_ENS-3	5hrs	UP
chr2:95609878-95641587	4.03972	5.35e-07	4.48486	4.54e-23		-	-	-	5hrs	UP
chr2:97744732-97755308	7.02127	0.00147227	6.83351	2.84e-08		-	-	-	5hrs	UP
chr2:125412753-125447353	7.29742	0.00104603	7.21467	0.00017453		ENSGALG00000015736	STMN2	stathmin-like_2	5hrs	UP
chr2:127587511-127603758	4.89844	3.18e-08	5.16862	4.51e-13		ENSGALG00000015862	CA2	carbonic_anhydrase_II	5hrs	UP
chr2:27268790-27332861	1.94712	0.0226037	1.97539	0.0389319		ENSGALG00000010780	ETV1	ets_variant_gene_1	5hrs	UP
chr2:30656243-30685766	3.00184	0.00125792	2.72443	0.0143692		-	-	-	5hrs	UP
chr2:38593736-38597476	2.84105	0.000250874	2.88276	1.02e-05		ENSGALG00000011424	EOMES	EOMESodermin_homolog_(Xenopus_laevis)	5hrs	UP
chr2:72991796-73002095	5.55796	6.83e-06	4.89578	1.67e-27		-	ENS-3	pol-like_protein_ENS-3	5hrs	UP
chr2:88046732-88076214	3.74709	0.00262976	3.83351	0.00412117		ENSGALG00000013183	TERT	telomerase_reverse_transcriptase	5hrs	UP
chr2:101445243-101471562	4.6554	0.000289995	5.25973	1.51e-09		-	KIAA0802	KIAA0802	5hrs	UP
chr2:101480407-101548718	4.86867	0.00327026	4.9961	2.97e-07		ENSGALG00000013357	SOGA2	SOGA_family_member_2	5hrs	UP
chr2:101673765-102254823	2.10621	0.021139	2.31089	0.00191943		ENSGALG00000013902	PTPRM	protein_tyrosine_phosphatase,_receptor_type,_M	5hrs	UP
chr2:108881772-108890271	6.61819	8.71e-05	6.79632	6.34e-06		-	-	-	5hrs	UP
chr2:121023526-121040055	2.29886	0.00885445	2.4789	2.05e-05		-	-	-	5hrs	UP
chr2:123687884-123692431	6.13609	2.11e-07	5.24908	4.11e-06		-	-	-	5hrs	UP
chr2:125330232-125352427	7.51483	0.000162688	7.52461	1.7e-15		-	-	-	5hrs	UP
chr2:129794088-129902586	6.89361	0.00630329	7.51858	2.17e-05		ENSGALG00000015926	RUNX1T1	runt-related_transcription_factor_1;_translocated_to,_1_(cyclin_D-related)	5hrs	UP
chr2:138295576-138301216	7.18629	2.84e-06	7.24908	7.42e-08		-	-	-	5hrs	UP
chr2:148178570-148181335	6.7093	0.00192113	6.9655	0.00072805		-	-	-	5hrs	UP
chr2:36209570-36209930	4.16336	6.56e-06	4.4601	3.02e-14		-	-	-	5hrs	UP
chr2:36219381-36220734	4.11465	1.36e-07	4.4581	1.03e-21		-	-	-	5hrs	UP
chr2:36221595-36222432	4.35589	1.77e-06	4.93845	4.22e-19		-	-	-	5hrs	UP
chr2:71668677-71669277	4.12558	3.1e-06	4.37081	2.11e-12		-	-	-	5hrs	UP
chr2:71801704-71802315	4.40368	0.0158837	5.24422	0.0245897		-	-	-	5hrs	UP
chr2:72025725-72027238	4.98099	2.67e-05	5.01205	0.000295537		-	-	-	5hrs	UP
chr2:72431675-72434275	3.26617	0.0021462	3.53727	0.0143566		-	-	-	5hrs	UP
chr2:84520332-84521867	3.86934	0.00144406	3.92554	0.0358806		-	-	-	5hrs	UP
chr2:95608646-95609735	4.08412	1.36e-06	4.17432	1.39e-14		-	-	-	5hrs	UP
chr2:97365602-97366619	6.79272	0.000102383	6.82918	0.00144752		-	-	-	5hrs	UP
chr2:97744732-97755308	5.14064	0.0103656	5.16405	0.00662211		-	-	-	5hrs	UP
chr2:97758151-97759211	4.74471	0.000133105	4.77893	0.00310995		-	-	-	5hrs	UP
chr2:138941535-138943695	4.74607	2.01e-05	4.73015	2.19e-05		-	-	-	5hrs	UP
chr2:139632909-139633176	3.86934	0.00144406	4.44227	0.000730959		-	-	-	5hrs	UP
chr2:139752753-139755923	5.76625	2.75e-05	5.78965	0.000288217		-	-	-	5hrs	UP
chr20:13422666-13425206	5.894	0.000891915	5.98896	0.0312591		ENSGALG00000007980	KCNG1	potassium_voltage-gated_channel,_subfamily_G,_member_1	5hrs	UP
chr20:13845147-13848448	3.12136	0.0113172	3.18161	0.0302636		-	SNAI1	snail_homolog_1_(Drosophila)	5hrs	UP
chr22:2610997-2623172	4.10502	4.95e-07	4.19739	3.3e-09		ENSGALG00000003473	SFRP1	secreted_frizzled-related_protein_1	5hrs	UP
chr23:1356989-1359206	2.00491	0.00523176	2.04431	0.00532889		ENSGALG00000000678	CITED3	Cbp/p300-interacting_transactivator_3	5hrs	UP
chr24:2522482-2550160	1.69004	0.0158723	1.69983	0.0091697		-	LOC769331	hypothetical_protein_LOC769331	5hrs	UP
chr26:284136-300387	2.51968	0.018817	2.41149	0.0443799		ENSGALG00000000628	KIF21B	kinesin_family_member_21B	5hrs	UP
chr26:300457-309468	2.22305	0.0227934	2.74961	0.0314481		ENSGALG00000000628	KIF21B	kinesin_family_member_21B	5hrs	UP
chr26:1502256-1508140	1.91906	0.0352673	1.99412	0.0350431		-	SOX13	SRY_(sex_determining_region_Y)-box_13	5hrs	UP
chr26:1697226-1773801	2.07192	0.0186503	2.15024	0.0326682		-	NFASC	neurofascin	5hrs	UP
chr26:2345507-2364747	2.00553	0.0101612	1.98508	0.0121283		-	MAPKAPK2	mitogen-activated_protein_kinase-activated_protein_kinase_2	5hrs	UP
chr26:1874897-1883258	2.93633	0.000380122	3.03868	0.000477658		-	NUAK2	NUAK_family,_SNF1-like_kinase,_2	5hrs	UP
chr27:2207501-2225804	2.96164	0.00153632	3.06225	0.00605891		ENSGALG00000000379	ITGB3	integrin,_beta_3_(platelet_glycoprotein_IIIa,_antigen_CD61)	5hrs	UP
chr27:2327519-2331537	4.29676	0.00587033	4.59955	0.0414387		-	MRC2	mannose_receptor,_C_type_2	5hrs	UP
chr28:839306-846286	4.08665	0.000441028	4.36696	0.00409395		ENSGALG00000000619	ANGPTL4	angiopoietin-like_4	5hrs	UP
chr3:2166475-2174715	1.7165	0.0136438	1.77543	0.00268848		ENSGALG00000004483	AHSA2	AHA1,_activator_of_heat_shock_90kDa_protein_ATPase_homolog_2_(yeast)	5hrs	UP
chr3:24519765-24523506	4.63585	0.000972228	5.33855	0.0184503		-	LOC421390	hypothetical_LOC421390	5hrs	UP
chr3:30412676-30446681	3.41498	4.16e-05	3.41847	5.92e-10		ENSGALG00000010065	KCNK5	potassium_channel,_subfamily_K,_member_5	5hrs	UP
chr3:41654377-41660834	2.74149	0.000281451	2.80605	0.000112299		ENSGALG00000011073	LOC429716	similar_to_GTP-binding_protein_SB128	5hrs	UP
chr3:69206570-69254295	3.46211	0.0127652	4.30155	0.0402221		-	C6orf186	chromosome_6_open_reading_frame_186	5hrs	UP
chr3:82412505-82417156	3.46726	0.0342891	4.10672	0.00157976		-	-	-	5hrs	UP
chr3:97427131-97432416	3.94612	0.000503651	3.93809	1.2e-05		ENSGALG00000016397	SOX11	SRY_(sex_determining_region_Y)-box_11	5hrs	UP
chr3:102113095-102118538	2.31207	0.0301751	2.47855	0.000216139		ENSGALG00000016462	MYCN	V-myc_myelocytomatosis_viral_related_oncogene,_neuroblastoma_derived_(avian)	5hrs	UP
chr3:104599204-104601532	1.7913	0.0115145	1.83089	0.0114196		ENSGALG00000016485	RHOB	ras_homolog_gene_family,_member_B	5hrs	UP
chr3:31536897-31541419	1.54531	0.0486282	1.6243	0.0466404		ENSGALG00000023241	LOC421441	similar_to_Spectrin_beta_chain,_brain_4_(Spectrin,_non-erythroid_beta_chain_4)_(Beta-V_spectrin)_(BSPECV)	5hrs	UP
chr3:32113335-32121563	2.00158	0.0179059	2.04155	0.0438422		ENSGALG00000010317	POLH	polymerase_(DNA_directed),_eta	5hrs	UP
chr3:59182140-59188153	4.19458	0.000491366	4.98896	0.00359595		ENSGALG00000002869	ENPP3	ectonucleotide_pyrophosphatase/phosphodiesterase_3	5hrs	UP
chr3:59203903-59220685	3.4264	0.0181565	5.98896	0.0312591		ENSGALG00000002869	ENPP3	ectonucleotide_pyrophosphatase/phosphodiesterase_3	5hrs	UP
chr3:59858808-59899561	1.99387	0.00743625	2.04354	0.0144252		-	KIAA1913	KIAA1913	5hrs	UP
chr3:61626976-61702855	1.52751	0.025717	1.59485	0.00574037		ENSGALG00000014829	RSPO3	R-spondin_3_homolog_(Xenopus_laevis)	5hrs	UP
chr3:64408411-64417575	4.05486	5.47e-07	3.96993	8.43e-16		-	-	-	5hrs	UP
chr3:70990544-71084290	4.84425	0.00167345	6.24422	0.0147479		ENSGALG00000015388	PRDM1	PR_domain_containing_1,_with_ZNF_domain	5hrs	UP
chr3:86524208-86534529	4.27208	0.000261314	4.50818	1.19e-08		-	-	-	5hrs	UP
chr3:96341371-96377841	5.34283	8.58e-06	5.52887	3.6e-23		-	-	-	5hrs	UP
chr3:107424237-107434491	3.55898	0.00103288	3.62201	4.22e-16		ENSGALG00000022843	-	-	5hrs	UP
chr3:108813925-108882147	1.75241	0.0347793	1.84731	0.0131214		ENSGALG00000016631	INTS9	integrator_complex_subunit_9	5hrs	UP
chr3:26166679-26168240	3.7118	1.14e-05	3.76812	2.42e-05		-	-	-	5hrs	UP
chr3:51742348-51745212	3.61802	0.000594618	3.65215	0.0126479		-	-	-	5hrs	UP
chr3:51745288-51746389	4.96556	0.00123303	4.98896	0.0487383		-	-	-	5hrs	UP
chr3:51746535-51748312	5.35121	0.000440926	5.37462	0.016443		-	-	-	5hrs	UP
chr3:51751379-51761179	4.87596	8.55e-09	4.88147	8.08e-12		-	-	-	5hrs	UP
chr3:51761497-51766798	4.69618	5.69e-08	4.76812	1.32e-09		-	-	-	5hrs	UP
chr3:86578919-86579274	3.88583	0.0067654	3.75723	0.0119619		-	-	-	5hrs	UP
chr3:86632157-86632722	3.18129	0.0200451	4.5105	0.0219319		-	-	-	5hrs	UP
chr3:87207987-87208422	3.83918	0.00254282	4.76812	0.00326975		-	-	-	5hrs	UP
chr3:92605361-92607216	4.2619	9.76e-09	4.53556	6.67e-23		-	-	-	5hrs	UP
chr3:92608854-92609862	5.07745	6.17e-09	5.11661	4.17e-18		-	-	-	5hrs	UP
chr3:95283421-95287866	2.66671	0.00409334	2.76412	0.0486507		-	-	-	5hrs	UP
chr3:95409441-95409678	5.09882	0.000872349	6.33855	0.0107766		-	-	-	5hrs	UP
chr3:96043632-96044153	4.01136	0.0050435	4.86766	0.00605421		ENSGALG00000016384	MYT1L	myelin_transcription_factor_1-like	5hrs	UP
chr3:97432525-97434848	3.64363	0.000725168	3.80735	0.0144863		-	-	-	5hrs	UP
chr3:107423395-107423680	3.86103	0.000165356	4.19739	0.000950102		-	-	-	5hrs	UP
chr4:10594558-10596382	1.68044	0.0158969	1.72066	0.0111912		ENSGALG00000007243	SOX3	SRY_(sex_determining_region_Y)-box_3	5hrs	UP
chr4:35069072-35099230	2.14463	0.00586552	2.37016	0.00636897		ENSGALG00000010107	FHDC1	FH2_domain_containing_1	5hrs	UP
chr4:47040172-47055729	4.1129	0.000648127	4.89275	0.00178965		ENSGALG00000010903	RASGEF1B	RasGEF_domain_family,_member_1B	5hrs	UP
chr4:50848021-50850366	2.73614	0.0235724	3.10188	0.0112498		-	DUSP4	dual_specificity_phosphatase_4	5hrs	UP
chr4:89350451-89365852	1.63476	0.030638	1.65051	0.0141189		ENSGALG00000015960	RPIA	ribose_5-phosphate_isomerase_A_(ribose_5-phosphate_epimerase)	5hrs	UP
chr4:9668486-9672980	5.4309	1.71e-05	5.71846	6.25e-06		-	-	-	5hrs	UP
chr4:11691370-11696331	6.97586	8.84e-05	7.75928	9.97e-11		-	-	-	5hrs	UP
chr4:51024645-51029986	1.81111	0.0156993	1.87127	0.00987586		-	-	-	5hrs	UP
chr4:74183626-74198544	4.68109	0.00512883	5.60462	0.000111966		-	-	-	5hrs	UP
chr4:82175811-82219049	1.81869	0.0300401	2.25716	0.0158278		ENSGALG00000015042	CRMP1	collapsin_response_mediator_protein_1	5hrs	UP
chr4:29063158-29063620	4.1149	4.08e-06	4.53443	1.06e-11		-	-	-	5hrs	UP
chr4:29066120-29068283	4.52128	2.21e-09	4.44609	2.59e-22		-	-	-	5hrs	UP
chr4:44052042-44052521	3.59632	0.00116957	4.82484	4.03e-07		-	-	-	5hrs	UP
chr4:57919275-57920704	4.18129	0.000888104	4.52662	0.0208428		-	-	-	5hrs	UP
chr4:57923676-57926350	7.79708	1.11e-08	8.44416	5.96e-16		-	-	-	5hrs	UP
chr5:18709425-18722088	2.2274	0.0067548	2.28203	0.00109677		ENSGALG00000007555	CCND1	cyclin_D1	5hrs	UP
chr5:24178686-24236683	6.1096	0.0048135	7.31089	9.42e-05		ENSGALG00000014072	TSPAN18	tetraspanin_18	5hrs	UP
chr5:24449797-24458172	1.78409	0.00935858	1.84832	0.000249529		ENSGALG00000008061	ASTL	astacin-like_metallo-endopeptidase_(M12_family)	5hrs	UP
chr5:27083311-27124132	1.72089	0.0124314	1.63094	0.00352563		ENSGALG00000008631	TYRO3	TYRO3_protein_tyrosine_kinase	5hrs	UP
chr5:57883561-57934277	2.42831	0.00265439	2.4104	0.00732222		ENSGALG00000012089	C14orf37	Chromosome_14_open_reading_frame_37	5hrs	UP
chr5:58372337-58372966	4.56156	7.46e-05	4.61111	0.00121085		ENSGALG00000027720	OTX2	orthodenticle_homeobox_2	5hrs	UP
chr5:4651987-4747620	4.31688	0.000230797	4.58496	9.34e-06		ENSGALG00000012136	MPPED2	metallophosphoesterase_domain_containing_2	5hrs	UP
chr5:17971216-17979939	2.66344	0.00205877	2.83094	0.00467014		ENSGALG00000007127	FADS1	fatty_acid_desaturase_1	5hrs	UP
chr5:33058983-33115278	2.19153	0.0322837	2.36469	0.0361227		ENSGALG00000009750	SPRED1	sprouty-related,_EVH1_domain_containing_1	5hrs	UP
chr5:52833367-52841059	3.31195	0.000304403	3.38587	1.26e-13		ENSGALG00000011511	CKB	creatine_kinase,_brain	5hrs	UP
chr5:56151555-56156062	4.47591	3.28e-07	4.562	1.75e-25		ENSGALG00000011858	ENS-1,ERNI	early_response_to_neural_induction_ERNI	5hrs	UP
chr5:35678517-35681566	4.66957	0.000366305	4.70719	0.0112666		-	-	-	5hrs	UP
chr5:35728850-35736475	5.76625	0.0106557	5.81613	0.0483517		-	-	-	5hrs	UP
chr6:34381220-34588842	2.88293	0.0254424	4.12223	9.42e-05		ENSGALG00000012740	ADAM12	ADAM_metallopeptidase_domain_12_(meltrin_alpha)	5hrs	UP
chr7:5776837-5791000	4.95622	2.66e-06	5.07039	2.38e-06		ENSGALG00000004140	SH3BP4	SH3-domain_binding_protein_4	5hrs	UP
chr7:10617855-10660968	1.97404	0.00649417	2.04503	0.00251621		ENSGALG00000007777	SLC39A10	solute_carrier_family_39_(zinc_transporter),_member_10	5hrs	UP
chr7:9163089-9172246	2.58981	0.00183296	2.60702	0.0121957		ENSGALG00000007735	SDPR	serum_deprivation_response_(phosphatidylserine_binding_protein)	5hrs	UP
chr7:9186828-9294206	4.38059	0.00197443	5.06451	0.00969812		ENSGALG00000007759	TMEFF2	transmembrane_protein_with_EGF-like_and_two_follistatin-like_domains_2	5hrs	UP
chr7:5710133-5711071	3.23678	0.00066436	3.26019	0.0124207		-	ARL4C	ADP-ribosylation_factor-like_4C	5hrs	UP
chr8:5929459-5936023	1.95622	0.00904071	1.96834	0.0117059		ENSGALG00000003678	GLUL	glutamate-ammonia_ligase_(glutamine_synthetase)	5hrs	UP
chr8:8929492-8938599	7.15122	4.19e-06	6.88367	9.57e-21		-	-	-	5hrs	UP
chr8:12058100-12075619	5.26808	3.78e-06	5.09077	1.57e-08		-	LOC424460	hypothetical_LOC424460	5hrs	UP
chr8:28644937-28665889	2.69681	0.000427139	2.84446	4.81e-05		ENSGALG00000011016	PGM1	phosphoglucomutase_1	5hrs	UP
chr8:28767091-28810099	2.07125	0.019563	2.23988	0.00189297		ENSGALG00000011019	ROR1	receptor_tyrosine_kinase-like_orphan_receptor_1	5hrs	UP
chr8:29305326-29315124	3.91825	0.000529044	4.97962	0.00113695		-	PDE4B	phosphodiesterase_4B,_cAMP-specific_(phosphodiesterase_E4_dunce_homolog,_Drosophila)	5hrs	UP
chr8:3905584-3909409	4.35251	6.54e-05	4.404	0.0001425		-	TMEM121	transmembrane_protein_121	5hrs	UP
chr8:4033976-4100588	2.23322	0.014057	2.31018	3.31e-06		-	MTA1	metastasis_associated_1	5hrs	UP
chr8:8490575-8502108	7.2712	0.00476783	7.36568	6.52e-05		-	-	-	5hrs	UP
chr8:26467555-26511431	2.38059	0.00573947	2.7743	0.0162399		-	PPAP2B	phosphatidic_acid_phosphatase_type_2B	5hrs	UP
chr9:19274719-19390971	2.22276	0.041774	2.67139	0.0161212		-	TBL1XR1	transducin_(beta)-like_1_X-linked_receptor_1	5hrs	UP
chr9:7627248-7715189	3.66662	0.00470914	3.71549	0.00140512		ENSGALG00000017371	SPSB4	splA/ryanodine_receptor_domain_and_SOCS_box_containing_4	5hrs	UP
chr9:3148029-3148391	4.96556	0.00123303	6.02345	0.00113631		-	-	-	5hrs	UP
chrUn_random:27468054-27469170	3.22081	0.00537026	2.85419	0.0489671		ENSGALG00000004335	LOC419204	Similar_to_junctophilin_type_2	5hrs	UP
chrUn_random:31023321-31025683	4.47079	0.0141414	3.35669	0.0344958		-	-	-	5hrs	UP
chrUn_random:36130252-36133166	6.36009	2.22e-05	5.75054	2.88e-09		-	-	-	5hrs	UP
chrUn_random:36163696-36164847	3.16431	0.000637236	3.49965	0.000804229		-	-	-	5hrs	UP
chrUn_random:62861471-62863291	5.18129	0.00388569	5.20469	0.027575		-	LOC777388	Hypothetical_protein_LOC777388	5hrs	UP
chrUn_random:14798850-14799466	3.18129	0.0294203	3.44076	0.0349145		-	-	-	5hrs	UP
chrUn_random:15389947-15391057	2.26512	0.0107565	3.96821	1.78e-09		-	-	-	5hrs	UP
chrUn_random:16605719-16606108	3.27985	0.00204636	4.18677	9.53e-07		-	-	-	5hrs	UP
chrUn_random:20032792-20033645	1.80932	0.029167	2.51423	0.0063982		-	-	-	5hrs	UP
chrUn_random:25305673-25306481	4.81871	0.000225534	4.26358	1.34e-06		-	-	-	5hrs	UP
chrUn_random:48118751-48119370	3.88583	0.0067654	4.45623	0.00269003		-	-	-	5hrs	UP
chrZ:23745643-23752264	3.47079	7.35e-05	3.53119	0.000263913		-	-	-	5hrs	UP
chrZ:54358306-54403803	4.00695	7.68e-05	3.96269	2.9e-09		ENSGALG00000015451	ZNF462	zinc_finger_protein_462	5hrs	UP
chrZ:54404042-54451286	4.06568	4.31e-05	4.0914	1.39e-10		-	-	-	5hrs	UP
chrZ:70666687-70748038	2.80249	0.00411418	2.90712	0.00639971		-	-	-	5hrs	UP
chrZ:28557830-28588002	1.64827	0.0237781	1.68126	0.0156789		ENSGALG00000015053	GLDC	glycine_dehydrogenase_(decarboxylating)	5hrs	UP
chrZ:43745593-43906184	2.94147	0.00387347	3.12928	0.00605757		-	ROR2	receptor_tyrosine_kinase-like_orphan_receptor_2	5hrs	UP
chrZ:53602290-53696883	3.38059	0.0024421	3.56314	0.00971715		ENSGALG00000015433	ABCA1	ATP-binding_cassette,_sub-family_A_(ABC1),_member_1	5hrs	UP
chrZ:61307586-61409263	2.10757	0.00985437	2.11277	0.000222116		-	VCAN	versican	5hrs	UP
chrZ:23743458-23744865	3.67812	0.000637944	3.71284	0.0141364		ENSGALG00000014930	ENC1	ectodermal-neural_cortex_(with_BTB-like_domain)	5hrs	UP
chrZ:43159981-43163099	6.25929	3.05e-05	6.28269	0.000265396		-	-	-	5hrs	UP
chrZ:48383409-48383797	4.66957	0.000366305	4.39466	2.76e-05		-	-	-	5hrs	UP
chrZ:48662762-48663351	4.14064	0.00812787	4.35669	0.00428892		-	-	-	5hrs	UP
chr1:76569324-76595958	3.59632	0.031867	3.67862	0.366251		ENSGALG00000017272	VWF	von_Willebrand_factor	5hrs	UP
chr1:79352785-79360692	2.76625	0.0189943	2.60551	0.0926179		ENSGALG00000022964	A2M	alpha-2-macroglobulin	5hrs	UP
chr1:92076418-92086999	3.81871	0.0409639	3.84212	0.313777		-	-	-	5hrs	UP
chr1:120830814-120834683	2.03884	0.02294	2.41328	0.0704781		-	-	-	5hrs	UP
chr1:37730490-37736017	4.25929	0.0202973	4.07916	0.2413		ENSGALG00000010049	PTPRB	protein_tyrosine_phosphatase,_receptor_type,_B	5hrs	UP
chr1:43500408-43504086	2.20866	0.011322	2.33593	0.069052		ENSGALG00000010992	SLC6A15	Solute_carrier_family_6,_member_15	5hrs	UP
chr1:43507074-43536165	2.18129	0.0304354	2.69773	0.0948495		ENSGALG00000010992	SLC6A15	Solute_carrier_family_6,_member_15	5hrs	UP
chr1:52148488-52166424	2.04531	0.030033	2.44076	0.100497		ENSGALG00000012053	FAM83F	family_with_sequence_similarity_83,_member_F	5hrs	UP
chr1:74765242-74776935	2.90349	0.0414004	3.77893	0.0813659		ENSGALG00000017295	PTHLH	parathyroid_hormone-like_hormone	5hrs	UP
chr1:103869321-103873675	4.29676	0.00587033	4.39232	0.156907		-	-	-	5hrs	UP
chr1:11368114-11368756	4.25929	0.0202973	4.28269	0.424263		-	-	-	5hrs	UP
chr1:37720520-37721038	4.01136	0.0304093	4.03477	0.502128		-	-	-	5hrs	UP
chr1:37722548-37723748	4.09882	0.0088512	4.12223	0.228805		-	-	-	5hrs	UP
chr1:49390935-49391372	3.59632	0.0234423	4.03477	0.0766476		ENSGALG00000011614	ANO4	Anoctamin	5hrs	UP
chr1:56429960-56431439	3.1157	0.00449688	3.1391	0.0773261		-	-	-	5hrs	UP
chr1:56431534-56432880	2.98864	0.0105254	3.01205	0.150135		-	-	-	5hrs	UP
chr1:74884236-74885123	3.91825	0.0351846	3.94166	0.530648		-	-	-	5hrs	UP
chr1:79332057-79332473	3.81871	0.0409639	4.98896	0.210222		ENSGALG00000022964	A2M	alpha-2-macroglobulin	5hrs	UP
chr1:99446869-99448567	4.68379	0.00246901	4.70719	0.0904304		-	-	-	5hrs	UP
chr1:103422816-103424008	5.05575	0.00492555	5.07916	0.186447		-	-	-	5hrs	UP
chr1:105202983-105203694	3.07025	0.0363131	3.61973	0.248836		-	-	-	5hrs	UP
chr1:144295035-144295465	3.47079	0.0295286	5.12223	0.175547		-	-	-	5hrs	UP
chr1:145422415-145423159	3.33329	0.0377335	4.35669	0.400768		-	-	-	5hrs	UP
chr1:153564191-153565482	3.76625	0.0170208	4.78965	0.266684		-	-	-	5hrs	UP
chr1:160728271-160728869	3.33329	0.0377335	4.35669	0.400768		-	-	-	5hrs	UP
chr1:167764256-167765123	3.7118	0.0480122	3.73521	0.591651		ENSGALG00000016941	PCDH17	Protocadherin_17	5hrs	UP
chr1:184204346-184206147	2.27439	0.0457471	2.41943	0.302639		-	-	-	5hrs	UP
chr10:15646704-15655667	2.56936	0.0260486	2.6722	0.217897		ENSGALG00000006826	KLHL25	kelch-like_25_(Drosophila)	5hrs	UP
chr10:19687551-19742217	1.88105	0.0184695	1.94689	0.0554754		ENSGALG00000007154	CHSY1	chondroitin_sulfate_synthase_1	5hrs	UP
chr10:20013627-20076756	2.78897	0.021958	3.22459	0.100367		ENSGALG00000023323	-	-	5hrs	UP
chr10:12795813-12797663	2.65522	0.0249895	2.67862	0.248765		-	-	-	5hrs	UP
chr10:13462686-13463642	4.65522	0.00264105	4.67862	0.0956042		-	-	-	5hrs	UP
chr10:19987754-19988403	3.18129	0.0294203	3.20469	0.382278		-	-	-	5hrs	UP
chr11:6761735-6768752	4.50768	0.00290776	3.35669	0.131404		-	-	-	5hrs	UP
chr11:11500201-11508113	2.1889	0.0193144	2.25716	0.13761		-	-	-	5hrs	UP
chr11:9021530-9023071	2.89889	0.0270146	2.1603	0.337598		ENSGALG00000004474	PLEKHF1	pleckstrin_homology_domain_containing,_family_F_(with_FYVE_domain)_member_1	5hrs	UP
chr12:6019578-6064515	2.18129	0.0371084	2.22459	0.210889		ENSGALG00000005120	FBLN2	Fibulin_2	5hrs	UP
chr12:11614502-11619783	3.33329	0.0218774	3.26743	0.201308		-	PLXNB1	plexin_B1	5hrs	UP
chr12:11619867-11628682	2.21299	0.0307743	2.32895	0.118472		-	PLXNB1	plexin_B1	5hrs	UP
chr13:7101384-7178073	3.28438	0.0240909	3.15024	0.184984		ENSGALG00000001690	GABRB2	gamma-aminobutyric_acid_(GABA)_A_receptor,_beta_2	5hrs	UP
chr13:10430745-10432092	2.43762	0.0411596	2.2364	0.337462		-	-	-	5hrs	UP
chr13:14067820-14089226	3.24839	0.0170968	2.10515	0.0835581		ENSGALG00000013760	GFPT2	glutamine-fructose-6-phosphate_transaminase_2	5hrs	UP
chr13:16185310-16186218	3.18129	0.0489809	2.84212	0.502778		-	PHF15	PHD_finger_protein_15	5hrs	UP
chr14:3240613-3245342	2.72757	0.0253557	3.00877	0.184347		-	LFNG	LFNG_O-fucosylpeptide_3-beta-N-acetylglucosaminyltransferase	5hrs	UP
chr14:13933086-13934653	2.24402	0.0489908	1.84212	0.320002		ENSGALG00000002440	METRN	meteorin,_glial_cell_differentiation_regulator	5hrs	UP
chr14:14676005-14688077	2.94996	0.0453748	4.61973	0.318063		-	-	-	5hrs	UP
chr14:6925797-6926292	4.01136	0.0304093	2.94166	0.599898		ENSGALG00000006078	PALB2	partner_and_localizer_of_BRCA2	5hrs	UP
chr15:8490756-8501676	5.22081	0.00360226	5.61973	0.0746099		ENSGALG00000006374	TBX6	T-box_6	5hrs	UP
chr15:9605896-9611695	3.53492	0.026264	2.99824	0.284509		ENSGALG00000007227	MSI1	musashi_homolog_1_(Drosophila)	5hrs	UP
chr15:2741502-2753625	3.86934	0.0139564	4.39232	0.156907		ENSGALG00000002461	MMP17	matrix_metallopeptidase_17_(membrane-inserted)	5hrs	UP
chr15:7410381-7411799	2.68943	0.041443	2.71284	0.381181		-	-	-	5hrs	UP
chr15:7726848-7728955	2.11828	0.0480546	2.14168	0.296335		-	-	-	5hrs	UP
chr17:4062993-4068447	5.7118	0.00133093	5.73521	0.0582506		ENSGALG00000007001	TLR4	toll-like_receptor_4	5hrs	UP
chr18:7072641-7080484	2.21852	0.00902812	2.21837	0.0610121		-	PITPNC1	phosphatidylinositol_transfer_protein,_cytoplasmic_1	5hrs	UP
chr18:4041771-4042684	3.18129	0.00363321	3.20469	0.0661192		ENSGALG00000001684	SEC14L1	SEC14-like_1_(S._cerevisiae)	5hrs	UP
chr18:6402967-6403480	3.81871	0.0409639	3.84212	0.560486		-	-	-	5hrs	UP
chr18:6404353-6405360	3.59632	0.0234423	3.61973	0.385407		-	-	-	5hrs	UP
chr18:7309274-7309760	3.7118	0.0480122	3.73521	0.591651		-	CACNG7	calcium_channel,_voltage-dependent,_gamma_subunit_7	5hrs	UP
chr18:7309818-7310227	3.18129	0.0489809	3.20469	0.519586		-	CACNG7	calcium_channel,_voltage-dependent,_gamma_subunit_7	5hrs	UP
chr19:3344045-3357640	3.7118	0.0480122	3.28269	0.494821		ENSGALG00000001617	CAMKK1	calcium/calmodulin-dependent_protein_kinase_kinase_1,_alpha	5hrs	UP
chr19:4792747-4797106	3.53492	0.026264	3.24422	0.274859		ENSGALG00000002367	LOC417537	similar_to_Nf2a	5hrs	UP
chr19:1303045-1303876	3.14064	0.0218271	3.16405	0.300703		-	-	-	5hrs	UP
chr19:1304296-1304902	4.25929	0.0202973	4.28269	0.424263		ENSGALG00000001153	AUTS2	autism_susceptibility_candidate_2	5hrs	UP
chr19:4721137-4721966	4.86934	0.00694738	4.98896	0.210222		-	TMEM132E	Transmembrane_protein_132E	5hrs	UP
chr19:4722069-4722770	5.01136	0.00535037	5.03477	0.197994		-	LOC417532	similar_to_hypothetical_protein_LOC124842	5hrs	UP
chr2:95375878-95386055	3.971	0.0294471	4.33245	0.0778303		-	-	-	5hrs	UP
chr2:108351934-108388549	6.94834	0.00529309	5.55833	0.0844049		-	-	-	5hrs	UP
chr2:154329487-154331050	2.33329	0.0158871	2.27869	0.152966		-	MAFA	v-maf_musculoaponeurotic_fibrosarcoma_oncogene_homolog_A	5hrs	UP
chr2:1373403-1374309	2.86934	0.0376345	2.89275	0.391632		-	-	-	5hrs	UP
chr2:33470519-33472335	3.98864	0.0028467	4.05713	0.072978		-	LOC428436	Similar_to_KIAA0644_protein	5hrs	UP
chr2:33472605-33474546	4.01136	0.0050435	4.03477	0.136952		-	-	-	5hrs	UP
chr2:50829084-50829945	3.81871	0.0409639	3.84212	0.560486		-	-	-	5hrs	UP
chr2:72885787-72886148	4.18129	0.0231051	5.16405	0.16526		-	-	-	5hrs	UP
chr2:74333766-74334173	3.7118	0.0480122	3.73521	0.591651		-	-	-	5hrs	UP
chr2:75544144-75545002	3.7118	0.0480122	3.73521	0.591651		-	-	-	5hrs	UP
chr2:84522533-84524054	2.56156	0.0367432	2.58496	0.320184		-	-	-	5hrs	UP
chr2:95570053-95570372	4.18129	0.0231051	4.28269	0.424263		-	-	-	5hrs	UP
chr2:96387594-96388321	3.81871	0.0409639	3.84212	0.560486		-	-	-	5hrs	UP
chr2:97759845-97760286	5.01136	0.00535037	5.16405	0.16526		-	-	-	5hrs	UP
chr2:128827044-128827242	4.47079	0.0141414	4.78965	0.266684		-	-	-	5hrs	UP
chr2:148182635-148183121	4.09882	0.0264351	4.12223	0.474909		-	-	-	5hrs	UP
chr2:148184109-148185690	5.18129	0.00388569	5.20469	0.155555		-	-	-	5hrs	UP
chr20:12070717-12075259	2.51386	0.0298264	2.61973	0.234641		ENSGALG00000007772	CBLN4	cerebellin_4_precursor	5hrs	UP
chr20:2677282-2682366	2.27123	0.0175751	2.07039	0.118234		ENSGALG00000003409	SOGA1	suppressor_of_glucose,_autophagy_associated_1	5hrs	UP
chr21:4546196-4547429	3.28438	0.0240909	3.30778	0.348081		-	-	-	5hrs	UP
chr22:962611-966512	2.94996	0.00936495	3.11277	0.10111		ENSGALG00000000317	NEFM	neurofilament,_medium_polypeptide_150kDa	5hrs	UP
chr22:2523638-2524726	4.43762	0.00432965	4.46103	0.140676		-	C8orf4	Chromosome_8_open_reading_frame_4	5hrs	UP
chr26:1874074-1874575	2.56156	0.0367432	2.39232	0.34765		-	NUAK2	NUAK_family,_SNF1-like_kinase,_2	5hrs	UP
chr27:2331668-2333052	3.07025	0.0363131	3.53727	0.274185		-	MRC2	mannose_receptor,_C_type_2	5hrs	UP
chr3:2165007-2166151	2.51386	0.0481617	2.35669	0.360508		-	-	-	5hrs	UP
chr3:69376042-69378842	2.3217	0.009348	2.49943	0.0555589		ENSGALG00000015066	WASF1	WAS_protein_family,_member_1	5hrs	UP
chr3:100743467-100765216	1.64482	0.0296447	1.68518	0.0646115		ENSGALG00000016457	TRIB2	tribbles_homolog_2_(Drosophila)	5hrs	UP
chr3:8611887-8615949	3.7118	0.0480122	2.35669	0.652462		-	-	-	5hrs	UP
chr3:59188837-59199014	3.40368	0.0333175	5.24422	0.146401		ENSGALG00000002869	ENPP3	ectonucleotide_pyrophosphatase/phosphodiesterase_3	5hrs	UP
chr3:70988680-70990477	3.91825	0.0126863	5.16405	0.16526		ENSGALG00000015388	PRDM1	PR_domain_containing_1,_with_ZNF_domain	5hrs	UP
chr3:93886835-93935766	4.09882	0.0264351	4.35669	0.400768		ENSGALG00000016352	DLGAP2	discs,_large_(Drosophila)_homolog-associated_protein_2	5hrs	UP
chr3:112624202-112628491	3.07025	0.0363131	2.61973	0.413566		ENSGALG00000016710	CYP39A1	cytochrome_P450,_family_39,_subfamily_A,_polypeptide_1	5hrs	UP
chr3:2162909-2163870	4.18129	0.0231051	4.03477	0.254426		ENSGALG00000007436	LOC421195	similar_to_FAT_tumor_suppressor_homolog_4	5hrs	UP
chr3:14431725-14433387	4.05575	0.00965603	4.07916	0.2413		ENSGALG00000009020	JAG1	jagged_1_(Alagille_syndrome)	5hrs	UP
chr3:30342765-30343446	4.09882	0.0264351	4.20469	0.448964		ENSGALG00000010065	KCNK5	potassium_channel,_subfamily_K,_member_5	5hrs	UP
chr3:51741494-51742239	4.30904	0.00238799	4.33245	0.0778303		-	-	-	5hrs	UP
chr3:51748368-51749675	4.30904	0.00238799	4.38054	0.0701309		-	-	-	5hrs	UP
chr3:51749730-51750136	4.47079	0.0141414	4.4942	0.357245		-	-	-	5hrs	UP
chr3:51750278-51751209	4.59632	0.00302874	4.61973	0.106822		-	-	-	5hrs	UP
chr3:70987426-70988592	3.7118	0.00997897	3.73521	0.21482		-	-	-	5hrs	UP
chr3:82423239-82424487	3.65522	0.0210003	3.67862	0.366251		-	-	-	5hrs	UP
chr3:88368821-88370202	3.28438	0.0240909	3.84212	0.313777		ENSGALG00000016264	LOC428640	hypothetical_LOC428640	5hrs	UP
chr3:89618303-89618904	3.91825	0.0351846	3.84212	0.560486		-	-	-	5hrs	UP
chr3:95287924-95288780	2.94996	0.0453748	2.90923	0.48073		-	-	-	5hrs	UP
chr3:110011797-110012903	3.76625	0.0170208	4.73521	0.282881		-	-	-	5hrs	UP
chr4:1379126-1391424	2.94358	0.0195318	3.00675	0.0603681		-	GPR23	G_protein-coupled_receptor_23	5hrs	UP
chr4:3035082-3044456	2.91825	0.0342123	2.35669	0.360508		ENSGALG00000005957	SLC6A14	solute_carrier_family_6_(amino_acid_transporter),_member_14	5hrs	UP
chr4:3390417-3399395	2.17182	0.028465	2.35669	0.111526		-	IL13RA1	interleukin_13_receptor,_alpha_1	5hrs	UP
chr4:58672182-58675170	3.40368	0.0333175	2.61973	0.484612		-	-	-	5hrs	UP
chr4:4765421-4977976	3.40368	0.0333175	3.35669	0.332017		ENSGALG00000006508	FGF13	fibroblast_growth_factor_13	5hrs	UP
chr4:12327577-12336377	3.98099	0.00542104	4.35669	0.0738839		ENSGALG00000007710	LOC422321	Similar_to_Rasl11c_protein	5hrs	UP
chr4:31245736-31253321	4.01136	0.0304093	4.4942	0.357245		ENSGALG00000009880	INPP4B	inositol_polyphosphate-4-phosphatase,_type_II,_105kDa	5hrs	UP
chr4:93283420-93285603	2.38059	0.0276186	2.67035	0.113903		ENSGALG00000010588	CNOT2	CCR4-NOT_transcription_complex,_subunit_2	5hrs	UP
chr4:4761688-4763074	4.81871	0.00761657	4.84212	0.251359		-	-	-	5hrs	UP
chr4:10592397-10592994	3.22081	0.0184335	3.24422	0.274859		ENSGALG00000007245	-	-	5hrs	UP
chr4:31210527-31211573	3.59632	0.0234423	3.61973	0.385407		-	-	-	5hrs	UP
chr4:46772609-46773007	3.7118	0.0480122	3.61973	0.624138		-	-	-	5hrs	UP
chr4:63366691-63369118	4.07025	0.00437528	4.06451	0.130174		-	-	-	5hrs	UP
chr4:74932804-74933075	4.25929	0.0202973	5.12223	0.175547		-	-	-	5hrs	UP
chr5:8138476-8142228	2.44877	0.0229971	2.3177	0.196784		ENSGALG00000005265	SYT9	synaptotagmin_IX	5hrs	UP
chr5:8143012-8169617	3.53492	0.026264	4.39232	0.156907		ENSGALG00000005265	SYT9	synaptotagmin_IX	5hrs	UP
chr5:17986928-18003968	2.28221	0.0122737	2.24854	0.0525186		-	-	-	5hrs	UP
chr5:52919483-52924438	2.01136	0.0480501	1.92458	0.30335		ENSGALG00000011525	BAG5	BCL2-associated_athanogene_5	5hrs	UP
chr5:55457055-55457827	3.7118	0.0480122	2.94166	0.599898		-	LOC423506	hypothetical_LOC423506	5hrs	UP
chr5:4226133-4226849	4.59632	0.0113407	4.61973	0.318063		-	-	-	5hrs	UP
chr5:4226979-4227477	3.91825	0.0351846	3.94166	0.530648		-	-	-	5hrs	UP
chr5:8170713-8171979	4.07025	0.00437528	4.09366	0.123714		-	-	-	5hrs	UP
chr5:8172094-8174265	2.77386	0.00634077	2.79727	0.0862507		-	-	-	5hrs	UP
chr5:8174439-8175397	2.85266	0.0235075	2.87607	0.268745		-	-	-	5hrs	UP
chr5:11163232-11163763	3.7118	0.0480122	3.61973	0.624138		-	-	-	5hrs	UP
chr5:17970488-17971145	2.85266	0.0235075	2.84212	0.279898		ENSGALG00000007127	FADS1	fatty_acid_desaturase_1	5hrs	UP
chr5:34912407-34912985	4.18129	0.0231051	4.12223	0.474909		-	-	-	5hrs	UP
chr5:35575581-35576557	4.18129	0.0231051	4.12223	0.474909		-	-	-	5hrs	UP
chr5:35682357-35683035	3.91825	0.0351846	3.84212	0.560486		-	-	-	5hrs	UP
chr5:57934484-57936682	3.09882	0.0131285	3.12223	0.192943		-	C14orf37	Chromosome_14_open_reading_frame_37	5hrs	UP
chr6:11874656-11877163	3.81871	0.00449708	3.91741	0.0978035		ENSGALG00000004118	STOX1	storkhead_box_1	5hrs	UP
chr6:27437021-27445272	5.18129	0.00388569	5.4942	0.095456		ENSGALG00000008581	DUSP5	Dual_specificity_phosphatase_5	5hrs	UP
chr6:26579779-26601721	3.47079	0.0295286	3.03477	0.343535		-	SORCS1	sortilin-related_VPS10_domain_containing_receptor_1	5hrs	UP
chr6:27445357-27446187	4.91825	0.00635329	4.94166	0.223167		-	DUSP5	Dual_specificity_phosphatase_5	5hrs	UP
chr7:37363205-37392741	2.85266	0.0235075	4.12223	0.11756		ENSGALG00000012537	KCNJ3	potassium_inwardly-rectifying_channel,_subfamily_J,_member_3	5hrs	UP
chr7:5707133-5708013	2.80277	0.00681662	2.82618	0.0931919		-	ARL4C	ADP-ribosylation_factor-like_4C	5hrs	UP
chr7:5711134-5711725	2.52921	0.0212873	2.55261	0.201877		-	ARL4C	ADP-ribosylation_factor-like_4C	5hrs	UP
chr8:9195529-9201842	3.47079	0.0105881	3.76269	0.130541		-	-	-	5hrs	UP
chr8:4021900-4024471	3.33329	0.0218774	3.35669	0.176333		-	-	-	5hrs	UP
chr8:28592026-28616754	2.57062	0.0230047	2.2238	0.112159		-	ITGB3BP	integrin_beta_3_binding_protein_(beta3-endonexin)	5hrs	UP
chr8:20475954-20476455	3.81871	0.0409639	2.84212	0.628684		-	KIAA0467	KIAA0467	5hrs	UP
chr9:13772026-13774955	4.65522	0.0102146	5.03477	0.197994		ENSGALG00000006995	APOD	apolipoprotein_D	5hrs	UP
chr9:21465325-21470653	2.73383	0.0379367	2.84212	0.23445		ENSGALG00000023616	LRRC31	leucine_rich_repeat_containing_31	5hrs	UP
chr9:8682920-8683418	3.40368	0.0333175	3.42708	0.448234		-	-	-	5hrs	UP
chr9:21411761-21413714	2.88078	0.00527002	3.01966	0.0697409		-	GPR160	G_protein-coupled_receptor_160	5hrs	UP
chrUn_random:2565169-2565958	4.53492	0.0126398	4.55833	0.337133		-	-	-	5hrs	UP
chrUn_random:22259299-22259937	4.25929	0.0202973	4.28269	0.424263		-	-	-	5hrs	UP
chrUn_random:33392865-33394336	1.83239	0.0199918	1.87882	0.0561584		-	-	-	5hrs	UP
chrUn_random:34114897-34115342	4.25929	0.0202973	4.28269	0.424263		-	-	-	5hrs	UP
chrUn_random:41427593-41428999	2.90444	0.0165733	3.00877	0.184347		-	-	-	5hrs	UP
chrUn_random:52807514-52808473	2.86934	0.0376345	2.05036	0.180064		-	-	-	5hrs	UP
chrZ:7894040-7896078	4.09882	0.0264351	4.67862	0.299994		ENSGALG00000001900	KIAA1045	KIAA1045	5hrs	UP
chrZ:42713114-42721138	2.46453	0.0076906	2.54934	0.0702675		ENSGALG00000010683	S1PR3	sphingosine-1-phosphate_receptor_3	5hrs	UP
chrZ:43329248-43382289	4.47079	0.00402345	4.84212	0.0683687		-	SYK	spleen_tyrosine_kinase	5hrs	UP
chrZ:70756865-70780879	2.65522	0.00700045	2.60551	0.0926179		ENSGALG00000002294	SEMA6A	sema_domain,_transmembrane_domain_(TM),_and_cytoplasmic_domain,_(semaphorin)_6A	5hrs	UP
chrZ:27472796-27486236	2.73383	0.0379367	2.75097	0.26385		ENSGALG00000010179	RFX3	regulatory_factor_X,_3_(influences_HLA_class_II_expression)	5hrs	UP
chrZ:27486912-27493249	3.7118	0.0480122	4.12223	0.474909		-	-	-	5hrs	UP
chrZ:55111705-55136799	4.47079	0.0141414	4.89275	0.236867		ENSGALG00000014693	MARCH3	membrane-associated_ring_finger_(C3HC4)_3,_E3_ubiquitin_protein_ligase	5hrs	UP
chrZ:70781058-70782368	3.79796	0.00286849	3.82136	0.0741287		-	-	-	5hrs	UP
chr1:25731310-25737613	4.5722	0.0560395	6.07916	0.024344		-	-	-	5hrs	UP
chr1:79339144-79352290	2.69399	0.0999093	3.16722	0.0387013		ENSGALG00000022964	A2M	alpha-2-macroglobulin	5hrs	UP
chr1:123703683-123747111	5.54245	0.826243	2.15701	0.00013814		ENSGALG00000016426	MAP3K15	mitogen-activated_protein_kinase_kinase_kinase_15	5hrs	UP
chr1:197983663-198057211	1.66261	0.0513333	1.8575	0.00521506		ENSGALG00000000681	PAK1	p21_protein_(Cdc42/Rac)-activated_kinase_1	5hrs	UP
chr1:173042816-173121053	4.10166	0.0513946	4.17881	2.21e-06		ENSGALG00000016997	RB1	retinoblastoma_1_(including_osteosarcoma)	5hrs	UP
chr1:98487499-98640522	3.59632	0.315137	4.37105	0.0159862		ENSGALG00000015506	GBE1	glucan_(1,4-alpha-),_branching_enzyme_1_(glycogen_branching_enzyme,_Andersen_disease,_glycogen_storage_disease_type_IV)	5hrs	UP
chr14:7696978-7753424	1.84986	0.0984103	1.7834	0.00434887		ENSGALG00000006646	ABCC1	ATP-binding_cassette,_sub-family_C_(CFTR/MRP),_member_1	5hrs	UP
chr17:6289752-6400368	2.10491	0.123824	2.51858	0.00280932		-	-	-	5hrs	UP
chr18:10398844-10406725	1.52898	0.0671357	1.57746	0.0383475		ENSGALG00000007650	SLC9A3R1	solute_carrier_family_9_(sodium/hydrogen_exchanger),_member_3_regulator_1	5hrs	UP
chr2:84524452-84560890	3.48539	0.106794	2.87607	0.039897		ENSGALG00000013114	VSTM2A	V-set_and_transmembrane_domain_containing_2A	5hrs	UP
chr2:103920858-103931601	1.89883	0.0504765	1.85955	0.0229397		ENSGALG00000014795	TGIF1	TGFB-induced_factor_homeobox_1	5hrs	UP
chr2:95609878-95641587	3.14522	0.280397	4.29843	9.18e-07		-	-	-	5hrs	UP
chr2:95609878-95641587	3.5829	0.180668	4.51785	1.89e-07		-	-	-	5hrs	UP
chr20:4999651-5007732	2.62226	0.063995	2.65492	0.0281308		ENSGALG00000003842	GHRH	growth_hormone_releasing_hormone	5hrs	UP
chr20:11990346-11993924	1.81234	0.0618	1.85698	0.0469912		ENSGALG00000007771	C20orf108	chromosome_20_open_reading_frame_108	5hrs	UP
chr3:17254861-17340415	2.00864	0.0544376	2.09091	0.0240897		ENSGALG00000008544	NCX1	sodium/calcium_exchanger_1_precursor	5hrs	UP
chr3:31550243-31563112	1.57474	0.0608609	1.6535	0.00952067		-	CAPN1	calpain_1,_(mu/I)_large_subunit	5hrs	UP
chr3:71546518-71630195	2.07535	0.0623812	2.11682	3.14e-05		-	-	-	5hrs	UP
chr5:24240471-24275955	1.60895	0.213136	1.81374	0.00251221		-	-	-	5hrs	UP
chr5:24240471-24275955	1.69322	0.194989	1.64049	0.00153727		-	-	-	5hrs	UP
chr8:26623045-26748997	1.57216	0.0638902	1.88157	0.0458672		ENSGALG00000010857	DAB1	disabled_homolog_1_(Drosophila)	5hrs	UP
chr9:5812550-5821513	1.76377	0.280611	1.85968	0.00387663		ENSGALG00000006317	ING5	inhibitor_of_growth_family,_member_5	5hrs	UP
chr9:8685431-8776445	2.01561	0.0652202	2.38212	0.0186458		ENSGALG00000005256	EPHA4	EPH_receptor_A4	5hrs	UP
chrW_random:7275-33308	1.61836	0.0576996	1.74664	0.0431296		-	-	-	5hrs	UP
chrZ:16102169-16202761	2.48312	0.0529358	2.62653	4.67e-10		-	SKIV2L2	superkiller_viralicidic_activity_2-like_2_(S._cerevisiae)	5hrs	UP
chrZ:41910325-41915046	1.75665	0.0502594	1.77623	0.0153774		ENSGALG00000012623	CFC1B	cripto,_FRL-1,_cryptic_family_1B	5hrs	UP
chr1:13684791-13689286	1.93736	0.15659	3.03477	0.343535		ENSGALG00000008312	GSAP	gamma-secretase_activating_protein	5hrs	UP
chr1:26129848-26132538	1.68943	0.224665	1.75097	0.615875		ENSGALG00000009104	ANKRD26	ankyrin_repeat_domain_26	5hrs	UP
chr1:29048547-29052746	1.91825	0.186843	2.20469	0.502619		ENSGALG00000009480	DOCK4	dedicator_of_cytokinesis_4	5hrs	UP
chr1:34895686-34896472	2.01136	0.208591	2.03477	0.738391		-	-	-	5hrs	UP
chr1:74910863-74981991	1.59632	0.275905	1.52953	0.579419		ENSGALG00000017293	CCDC91	coiled-coil_domain_containing_91	5hrs	UP
chr1:74982070-75029057	3.59632	0.0566788	2.25716	0.680312		-	CCDC91	coiled-coil_domain_containing_91	5hrs	UP
chr1:79362616-79366965	1.93736	0.0928323	1.89275	0.332706		ENSGALG00000022964	A2M	alpha-2-macroglobulin	5hrs	UP
chr1:80572486-80575921	1.7118	0.162919	2.03477	0.444101		ENSGALG00000014674	CLSTN3	calsyntenin_3	5hrs	UP
chr1:82728245-82732950	2.33329	0.168457	3.12223	0.545348		ENSGALG00000014924	POLQ	polymerase_(DNA_directed),_theta	5hrs	UP
chr1:99875140-99913169	1.59632	0.23124	1.56528	0.616525		-	ROBO1	roundabout,_axon_guidance_receptor,_homolog_1_(Drosophila)	5hrs	UP
chr1:99936352-99943446	2.59632	0.119713	2.03477	0.611619		ENSGALG00000015511	ROBO1	roundabout,_axon_guidance_receptor,_homolog_1_(Drosophila)	5hrs	UP
chr1:102962604-102967422	1.81871	0.213978	1.84212	0.625409		ENSGALG00000015720	CHODL	chondrolectin	5hrs	UP
chr1:116492940-116494285	1.59632	0.283145	1.73521	0.751102		-	-	-	5hrs	UP
chr1:141237655-141365818	1.54479	0.0717786	2.02524	0.088991		ENSGALG00000016817	RASA3	RAS_p21_protein_activator_3	5hrs	UP
chr1:142606969-142646907	2.16336	0.0649621	2.2978	0.315051		ENSGALG00000016837	MYO16	myosin_XVI	5hrs	UP
chr1:200818720-200843765	1.77689	0.198743	2.1343	0.481811		ENSGALG00000017304	PGM2L1	phosphoglucomutase_2-like_1	5hrs	UP
chr1:44696948-44698233	2.47079	0.141559	2.15024	0.708964		ENSGALG00000011177	CEP290	centrosomal_protein_290kDa	5hrs	UP
chr1:49844282-49850106	3.18129	0.0981235	3.03477	0.766481		ENSGALG00000011728	PDE6H	phosphodiesterase_6H,_cGMP-specific,_cone,_gamma	5hrs	UP
chr1:51155965-51157614	1.74833	0.27011	2.4942	0.720879		-	-	-	5hrs	UP
chr1:58898734-58902915	3.47079	0.067429	2.94166	0.599898		ENSGALG00000012857	DENND2A	DENN/MADD_domain_containing_2A	5hrs	UP
chr1:61258747-61264724	2.59632	0.119713	2.84212	0.628684		ENSGALG00000012934	BICD1	bicaudal_D_homolog_1_(Drosophila)	5hrs	UP
chr1:82663757-82664974	3.01136	0.0646906	2.77173	0.525645		ENSGALG00000014822	CTC1	CTS_telomere_maintenance_complex_component_1	5hrs	UP
chr1:100422256-100451140	3.01136	0.0646906	3.15024	0.40045		ENSGALG00000015519	ROBO2	roundabout,_axon_guidance_receptor,_homolog_2_(Drosophila)	5hrs	UP
chr1:112540423-112547911	2.67433	0.0735896	2.66703	0.397091		ENSGALG00000016147	ZNF295	zinc_finger_protein_295	5hrs	UP
chr1:132617694-132622279	1.59632	0.283145	4.20469	0.448964		-	GYG2	glycogenin_2	5hrs	UP
chr1:139929512-139951719	2.4264	0.0571925	3.03477	0.272641		ENSGALG00000016803	ST6GAL2	ST6_beta-galactosamide_alpha-2,6-sialyltranferase_2	5hrs	UP
chr1:173125543-173134939	1.90181	0.156559	2.41328	0.274086		ENSGALG00000017000	RCBTB2	regulator_of_chromosome_condensation_(RCC1)_and_BTB_(POZ)_domain_containing_protein_2	5hrs	UP
chr1:173138325-173145910	2.01136	0.121308	2.75097	0.26385		ENSGALG00000017000	RCBTB2	regulator_of_chromosome_condensation_(RCC1)_and_BTB_(POZ)_domain_containing_protein_2	5hrs	UP
chr1:174608953-174612605	2.33329	0.168457	3.94166	0.530648		ENSGALG00000017021	ATP7B	ATPase,_Cu++_transporting,_beta_polypeptide	5hrs	UP
chr1:174616281-174629989	1.94425	0.0844439	2.61973	0.268282		ENSGALG00000017021	ATP7B	ATPase,_Cu++_transporting,_beta_polypeptide	5hrs	UP
chr1:200572278-200575510	2.18129	0.126614	3.20469	0.519586		ENSGALG00000017314	C2CD3	C2_calcium-dependent_domain_containing_3	5hrs	UP
chr1:577510-577860	2.33329	0.168457	2.35669	0.753432		-	SAPS2	SAPS_domain_family,_member_2	5hrs	UP
chr1:1078263-1079176	1.63027	0.129301	1.61973	0.427388		ENSGALG00000008444	TUBA4A	tubulin,_alpha_4a	5hrs	UP
chr1:1082037-1082660	1.54741	0.186159	1.71926	0.440103		-	-	-	5hrs	UP
chr1:21566145-21567102	2.01136	0.139473	2.17227	0.56696		ENSGALG00000000003	PANX2	pannexin_2	5hrs	UP
chr1:24307825-24411099	3.33329	0.38872	3.35669	0.692965		ENSGALG00000008926	CADPS2	Ca++-dependent_secretion_activator_2	5hrs	UP
chr1:24307825-24411099	3.81871	0.312585	3.84212	0.560486		ENSGALG00000008926	CADPS2	Ca++-dependent_secretion_activator_2	5hrs	UP
chr1:24307825-24411099	2.96556	0.11319	2.98896	0.358961		ENSGALG00000008926	CADPS2	Ca++-dependent_secretion_activator_2	5hrs	UP
chr1:47336274-47384425	1.74833	0.754099	2.35669	0.753432		-	-	-	5hrs	UP
chr1:47467267-47467700	2.91825	0.0748692	2.94166	0.599898		-	-	-	5hrs	UP
chr1:52145612-52146352	1.74833	0.18512	2.03477	0.611619		-	-	-	5hrs	UP
chr1:52147438-52148092	1.88583	0.22997	2.4942	0.720879		-	-	-	5hrs	UP
chr1:62562060-62659937	1.59632	0.728448	1.61973	0.659024		ENSGALG00000012992	WNK1	WNK_lysine_deficient_protein_kinase_1	5hrs	UP
chr1:62562060-62659937	2.01136	0.768453	2.03477	0.738391		ENSGALG00000012992	WNK1	WNK_lysine_deficient_protein_kinase_1	5hrs	UP
chr1:70162691-70163053	2.47079	0.141559	2.4942	0.720879		-	TM7SF3	Transmembrane_7_superfamily_member_3	5hrs	UP
chr1:70686604-70687699	2.1109	0.0899522	1.98896	0.495477		-	-	-	5hrs	UP
chr1:74910863-74981991	3.91825	0.20327	3.94166	0.530648		ENSGALG00000017293	CCDC91	coiled-coil_domain_containing_91	5hrs	UP
chr1:75346749-75347669	3.01136	0.0646906	3.03477	0.572119		-	-	-	5hrs	UP
chr1:82495148-82495722	2.01136	0.19668	1.61973	0.779558		-	-	-	5hrs	UP
chr1:82497513-82497859	1.88583	0.22997	1.90923	0.768561		-	-	-	5hrs	UP
chr1:88736745-88737530	2.01136	0.19668	2.03477	0.738391		-	-	-	5hrs	UP
chr1:91150760-91151655	2.33329	0.0809102	2.35669	0.504792		-	-	-	5hrs	UP
chr1:99730773-99730980	2.59632	0.119713	1.61973	0.779558		-	ROBO1	roundabout,_axon_guidance_receptor,_homolog_1_(Drosophila)	5hrs	UP
chr1:103426277-103426628	2.81871	0.149909	2.97336	0.459488		-	-	-	5hrs	UP
chr1:103437626-103437897	2.47079	0.141559	3.78965	0.330464		-	-	-	5hrs	UP
chr1:110137921-110138461	3.33329	0.0809181	3.35669	0.692965		-	-	-	5hrs	UP
chr1:117342829-117545877	1.88583	0.400243	2.4942	0.720879		ENSGALG00000016272	TMEM47	Transmembrane_protein_47	5hrs	UP
chr1:120835076-120835808	2.47079	0.0524479	2.75723	0.365821		-	-	-	5hrs	UP
chr1:121533565-121534144	2.59632	0.119713	3.61973	0.624138		-	-	-	5hrs	UP
chr1:134745288-134745843	2.33329	0.12611	3.94166	0.159346		-	-	-	5hrs	UP
chr1:138270967-138271522	1.51386	0.259138	1.53727	0.719053		-	-	-	5hrs	UP
chr1:139925663-139926415	1.59632	0.254537	1.94166	0.696216		-	-	-	5hrs	UP
chr1:141159448-141160241	1.91825	0.186843	1.94166	0.696216		ENSGALG00000016815	UPF3A	UPF3_regulator_of_nonsense_transcripts_homolog_A_(yeast)	5hrs	UP
chr1:146106497-146106808	3.01136	0.12043	3.42708	0.448234		-	-	-	5hrs	UP
chr1:154611776-154612054	3.59632	0.0566788	3.84212	0.560486		-	-	-	5hrs	UP
chr1:162095216-162095457	2.67433	0.0735896	4.35669	0.165676		-	-	-	5hrs	UP
chr1:164531888-164545461	4.09882	0.201044	4.16405	0.216915		-	-	-	5hrs	UP
chr1:164550045-164550473	2.01136	0.19668	2.61973	0.689205		-	-	-	5hrs	UP
chr1:167196695-167196921	2.12684	0.168913	2.84212	0.336703		-	-	-	5hrs	UP
chr1:167683718-167684607	2.33329	0.099104	2.77173	0.525645		ENSGALG00000016941	PCDH17	Protocadherin_17	5hrs	UP
chr1:167684985-167685696	1.81871	0.213978	2.25716	0.680312		ENSGALG00000016941	PCDH17	Protocadherin_17	5hrs	UP
chr1:168602521-168603146	2.18129	0.126614	2.20469	0.61918		-	-	-	5hrs	UP
chr1:173123862-173124351	2.33329	0.168457	3.35669	0.692965		-	-	-	5hrs	UP
chr1:173680548-173681151	3.47079	0.067429	3.61973	0.624138		-	KCNRG	potassium_channel_regulator	5hrs	UP
chr1:177181596-177182292	1.68943	0.224665	1.71284	0.708722		-	-	-	5hrs	UP
chr1:184825973-184826549	1.7118	0.245781	1.73521	0.751102		-	ELMOD1	ELMO/CED-12_domain_containing_1	5hrs	UP
chr1:192120389-192121036	2.01136	0.19668	2.4942	0.720879		-	-	-	5hrs	UP
chr1:194811547-194812292	1.68943	0.224665	1.94166	0.696216		-	-	-	5hrs	UP
chr10:977668-978919	3.59632	0.0566788	2.69773	0.549338		ENSGALG00000001981	PARP6	poly_(ADP-ribose)_polymerase_family,_member_6	5hrs	UP
chr10:12753527-12754178	2.33329	0.168457	2.4942	0.720879		-	LOC415456	hypothetical_gene_supported_by_CR388912	5hrs	UP
chr10:16367552-16371294	1.59632	0.318934	2.09366	0.541226		ENSGALG00000006949	CHD2	Chromodomain_helicase_DNA_binding_protein_2	5hrs	UP
chr10:824279-870665	2.59632	0.119713	2.10515	0.588966		ENSGALG00000002078	MYO9A	myosin_IXA	5hrs	UP
chr10:3611235-3695974	14.3504	0.994039	2.4942	0.526597		ENSGALG00000002708,ENSGALG00000002713	LINGO1,LOC415345	Leucine-rich_repeat_and_immunoglobulin-like_domain-containing_nogo_receptor-interacting_protein_1	5hrs	UP
chr10:19186812-19206788	1.91825	0.186843	1.61973	0.659024		-	-	-	5hrs	UP
chr10:19317245-19351358	1.74833	0.27011	1.71284	0.708722		-	-	-	5hrs	UP
chr10:19992083-20007747	2.54857	0.0851748	2.67862	0.0876947		ENSGALG00000007371	IGDCC3	immunoglobulin_superfamily,_DCC_subclass,_member_3	5hrs	UP
chr10:336166-336864	2.7118	0.101823	2.73521	0.65846		ENSGALG00000002471	ZNF592	zinc_finger_protein_592	5hrs	UP
chr10:337217-337809	1.88583	0.22997	1.90923	0.768561		-	-	-	5hrs	UP
chr10:12797882-12798564	3.59632	0.0566788	3.61973	0.624138		-	-	-	5hrs	UP
chr10:15660926-15661695	2.01136	0.163633	2.03477	0.669821		ENSGALG00000023376	-	-	5hrs	UP
chr10:16388882-16389339	1.88583	0.22997	1.90923	0.768561		-	-	-	5hrs	UP
chr10:19182030-19182818	1.52593	0.235165	1.54934	0.681423		ENSGALG00000007069	ADAMTS17	ADAM_metallopeptidase_with_thrombospondin_type_1_motif,_17	5hrs	UP
chr10:19988462-19989420	3.09882	0.0561628	3.12223	0.545348		-	-	-	5hrs	UP
chr10:19990735-19991515	2.4264	0.109609	2.4498	0.625431		-	-	-	5hrs	UP
chr10:21500090-21500695	1.66344	0.191476	1.68684	0.637175		-	-	-	5hrs	UP
chr11:740721-750277	1.63285	0.135816	2.06225	0.326062		ENSGALG00000014326	ARL2BP	ADP-ribosylation_factor-like_2_binding_protein	5hrs	UP
chr11:6760055-6761735	2.81871	0.0574148	2.90923	0.48073		-	-	-	5hrs	UP
chr11:8221696-8226177	2.01136	0.19668	1.84212	0.625409		ENSGALG00000004071	NETO2	neuropilin_(NRP)_and_tolloid_(TLL)-like_2	5hrs	UP
chr11:11472067-11500148	2.23375	0.145659	2.97336	0.459488		ENSGALG00000004907	KCTD15	potassium_channel_tetramerisation_domain_containing_15	5hrs	UP
chr11:974446-977903	2.81871	0.0870836	2.55833	0.505251		ENSGALG00000001702	EXOC3L	Exocyst_complex_component_3-like	5hrs	UP
chr11:11990991-11992524	3.01136	0.12043	4.09366	0.123714		ENSGALG00000005114	CES1	carboxylesterase_1_(monocyte/macrophage_serine_esterase_1)	5hrs	UP
chr11:12346683-12348117	2.09882	0.143729	1.88276	0.658876		ENSGALG00000005264	SPATA2L	spermatogenesis_associated_2-like	5hrs	UP
chr11:19610850-19616382	1.97072	0.0949131	2.53727	0.261917		ENSGALG00000005757	IRF8	interferon_regulatory_factor_8	5hrs	UP
chr11:551393-551729	1.59632	0.283145	1.61973	0.779558		-	-	-	5hrs	UP
chr11:6768804-6769617	1.91825	0.186843	2.03477	0.669821		-	-	-	5hrs	UP
chr11:7490977-7491452	2.01136	0.19668	2.35669	0.652462		-	-	-	5hrs	UP
chr11:11508728-11509537	3.01136	0.0646906	2.53727	0.599231		-	-	-	5hrs	UP
chr11:19655774-19656553	1.74833	0.141817	1.81904	0.52467		-	-	-	5hrs	UP
chr12:11251618-11301793	1.86468	0.087867	1.98896	0.12853		ENSGALG00000006425	SLC6A6	Solute_carrier_family_6_(neurotransmitter_transporter,_taurine),_member_6	5hrs	UP
chr12:19669263-19722212	1.59632	0.21204	1.87127	0.574907		ENSGALG00000008339	GRM7	glutamate_receptor,_metabotropic_7	5hrs	UP
chr12:6685167-6714313	2.5933	0.0508178	2.8003	0.0745458		ENSGALG00000005210	WNK2	WNK_lysine_deficient_protein_kinase_2	5hrs	UP
chr12:2489432-2489728	3.59632	0.0566788	2.61973	0.689205		-	LOC770732	hypothetical_protein_LOC770732	5hrs	UP
chr12:3510586-3511056	2.81871	0.0870836	2.25716	0.680312		ENSGALG00000004676	LOC415950	hypothetical_LOC415950	5hrs	UP
chr12:8854569-8874223	2.01136	0.593415	1.61973	0.779558		ENSGALG00000005527	APPL1	adaptor_protein,_phosphotyrosine_interaction,_PH_domain_and_leucine_zipper_containing_1	5hrs	UP
chr12:9264623-9265259	1.7118	0.245781	1.73521	0.751102		-	-	-	5hrs	UP
chr12:20256953-20257183	3.59632	0.0566788	2.03477	0.738391		-	-	-	5hrs	UP
chr12:20428511-20429062	3.59632	0.0566788	2.61973	0.689205		-	-	-	5hrs	UP
chr13:6901881-6985336	2.07025	0.238365	1.89275	0.530509		ENSGALG00000001698	GABRA1	gamma-aminobutyric_acid_(GABA)_A_receptor,_alpha_1	5hrs	UP
chr13:7187379-7190696	2.51386	0.0956295	2.98896	0.358961		ENSGALG00000001690	GABRB2	gamma-aminobutyric_acid_(GABA)_A_receptor,_beta_2	5hrs	UP
chr13:7221506-7239238	1.6174	0.110325	1.54378	0.344988		ENSGALG00000001690	GABRB2	gamma-aminobutyric_acid_(GABA)_A_receptor,_beta_2	5hrs	UP
chr13:7619751-7629998	1.51386	0.259138	1.81237	0.59512		ENSGALG00000001445	FABP6	fatty_acid_binding_protein_6,_ileal_(gastrotropin)	5hrs	UP
chr13:8528408-8532797	2.59632	0.119713	2.25716	0.680312		ENSGALG00000001239	SLC26A2	solute_carrier_family_26_(sulfate_transporter),_member_2	5hrs	UP
chr13:16694343-16874067	1.62974	0.176556	1.51393	0.295888		-	-	-	5hrs	UP
chr13:17325810-17362380	2.63588	0.0571384	2.37716	0.195189		ENSGALG00000006683	PDLIM4	PDZ_and_LIM_domain_4	5hrs	UP
chr13:1412889-1419352	2.81871	0.149909	3.4942	0.657924		ENSGALG00000000949	HBEGF	heparin-binding_EGF-like_growth_factor	5hrs	UP
chr13:7633629-7637317	2.01136	0.19668	2.20469	0.61918		ENSGALG00000001445	FABP6	fatty_acid_binding_protein_6,_ileal_(gastrotropin)	5hrs	UP
chr13:11439887-11445667	2.33329	0.168457	2.42708	0.548657		ENSGALG00000003818	CYFIP2	cytoplasmic_FMR1_interacting_protein_2	5hrs	UP
chr13:11453836-11457254	2.33329	0.168457	2.4498	0.625431		ENSGALG00000003818	CYFIP2	cytoplasmic_FMR1_interacting_protein_2	5hrs	UP
chr13:13610724-13619630	1.77689	0.198743	1.77173	0.64793		ENSGALG00000005929	MAML1	mastermind-like_1_(Drosophila)	5hrs	UP
chr13:16932067-16935237	2.01136	0.29998	2.30778	0.466269		-	-	-	5hrs	UP
chr13:16937207-16993695	2.44432	0.0782268	2.1458	0.132946		ENSGALG00000006569	RAPGEF6	Rap_guanine_nucleotide_exchange_factor_(GEF)_6	5hrs	UP
chr13:16937207-16993695	2.18129	0.33963	1.93747	0.218809		ENSGALG00000006569	RAPGEF6	Rap_guanine_nucleotide_exchange_factor_(GEF)_6	5hrs	UP
chr13:16937207-16993695	2.36186	0.0918911	2.58496	0.135141		ENSGALG00000006569	RAPGEF6	Rap_guanine_nucleotide_exchange_factor_(GEF)_6	5hrs	UP
chr13:16994582-17042224	2.51386	0.0956295	3.404	0.316616		ENSGALG00000006569	RAPGEF6	Rap_guanine_nucleotide_exchange_factor_(GEF)_6	5hrs	UP
chr13:3277999-3278430	3.33329	0.0809181	3.35669	0.692965		-	-	-	5hrs	UP
chr13:7185027-7185675	3.09882	0.0561628	3.12223	0.545348		ENSGALG00000001690	GABRB2	gamma-aminobutyric_acid_(GABA)_A_receptor,_beta_2	5hrs	UP
chr13:7242187-7243149	2.18129	0.0902569	2.03477	0.517478		-	-	-	5hrs	UP
chr13:8727083-8727601	3.47079	0.067429	2.4942	0.720879		ENSGALG00000002816	STK10	serine/threonine_kinase_10	5hrs	UP
chr13:8806106-8806731	1.85936	0.176211	1.61973	0.694753		ENSGALG00000002831	SH3PXD2B	SH3_and_PX_domains_2B	5hrs	UP
chr13:8809454-8810224	2.59632	0.119713	2.03477	0.738391		-	-	-	5hrs	UP
chr13:10305650-10306216	2.88583	0.0509619	2.90923	0.48073		ENSGALG00000002971	NSD1	nuclear_receptor_binding_SET_domain_protein_1	5hrs	UP
chr13:10456930-10457513	1.77689	0.198743	1.8003	0.683477		-	-	-	5hrs	UP
chr13:11430529-11431108	1.59632	0.283145	1.61973	0.779558		-	-	-	5hrs	UP
chr13:11432181-11432824	1.59632	0.23124	1.61973	0.694753		-	-	-	5hrs	UP
chr13:13598451-13599411	1.64879	0.167787	1.6722	0.578387		-	-	-	5hrs	UP
chr13:16186330-16186676	2.59632	0.0837396	2.61973	0.573866		-	PHF15	PHD_finger_protein_15	5hrs	UP
chr13:16931490-16931867	1.59632	0.283145	1.61973	0.779558		-	-	-	5hrs	UP
chr13:16932067-16935237	3.12684	0.0711286	2.20469	0.349173		-	-	-	5hrs	UP
chr14:2142570-2145277	2.59632	0.119713	1.84212	0.723315		-	HEATR2	HEAT_repeat_containing_2	5hrs	UP
chr14:6969940-6972056	2.59632	0.119713	1.71284	0.708722		ENSGALG00000006140	GGA2	Golgi_associated,_gamma_adaptin_ear_containing,_ARF_binding_protein_2	5hrs	UP
chr14:7494586-7502136	2.47079	0.141559	2.03477	0.669821		ENSGALG00000006450	UNKL	unkempt_homolog_(Drosophila)-like	5hrs	UP
chr14:13869373-13873033	1.88583	0.22997	3.84212	0.560486		ENSGALG00000002535	WDR90	WD_repeat_domain_90	5hrs	UP
chr14:14982896-14989783	1.76137	0.152011	2.03477	0.38507		ENSGALG00000009204	C16orf59	chromosome_16_open_reading_frame_59	5hrs	UP
chr14:15134197-15136123	2.53492	0.0700593	3.67862	0.366251		ENSGALG00000001772	MAPK8IP3	mitogen-activated_protein_kinase_8_interacting_protein_3	5hrs	UP
chr14:15172240-15178383	1.91825	0.186843	2.84212	0.408908		ENSGALG00000001841	ROGDI	rogdi_homolog_(Drosophila)	5hrs	UP
chr14:4804541-4806388	2.47079	0.0784356	2.4942	0.526597		ENSGALG00000004860	RASD1	RAS,_dexamethasone-induced_1	5hrs	UP
chr14:4739476-4739935	1.74833	0.27011	1.77173	0.799433		-	-	-	5hrs	UP
chr14:4740144-4740669	1.88583	0.22997	1.90923	0.768561		-	-	-	5hrs	UP
chr14:4743127-4744030	2.81871	0.0870836	2.94166	0.599898		-	-	-	5hrs	UP
chr14:7515716-7516784	2.08175	0.12451	2.03477	0.611619		ENSGALG00000006450	UNKL	unkempt_homolog_(Drosophila)-like	5hrs	UP
chr14:8749689-8750115	1.74833	0.27011	2.20469	0.78679		ENSGALG00000006925	CCP110	centriolar_coiled_coil_protein_110kDa	5hrs	UP
chr14:10079838-10094520	2.01136	0.775364	1.61973	0.694753		-	-	-	5hrs	UP
chr14:15183007-15183822	2.05575	0.0890995	2.22741	0.448176		ENSGALG00000001841	ROGDI	rogdi_homolog_(Drosophila)	5hrs	UP
chr15:558169-569264	1.64452	0.0640193	1.53727	0.170876		ENSGALG00000021547	YPEL1	yippee-like_1_(Drosophila)	5hrs	UP
chr15:5823493-5824933	1.88583	0.149291	2.09366	0.541226		ENSGALG00000004397	MLXIP	MLX_interacting_protein	5hrs	UP
chr15:9360443-9363055	1.55885	0.155657	1.58731	0.475042		-	C12orf43	Chromosome_12_open_reading_frame_43	5hrs	UP
chr15:11653003-11655419	2.12684	0.282078	2.73521	0.445413		ENSGALG00000008206	TESC	tescalcin	5hrs	UP
chr15:12007173-12014258	2.33329	0.168457	1.94166	0.696216		ENSGALG00000008238	MED13L	mediator_complex_subunit_13-like	5hrs	UP
chr15:5490960-5496122	2.47079	0.141559	3.20469	0.519586		ENSGALG00000004011	CAMKK2	calcium/calmodulin-dependent_protein_kinase_kinase_2,_beta	5hrs	UP
chr15:7730375-7759430	2.01136	0.0967574	2.16405	0.431055		-	-	-	5hrs	UP
chr15:7922054-7934746	1.54462	0.181956	1.60413	0.273085		ENSGALG00000005695	CHEK2	CHK2_checkpoint_homolog_(S._pombe)	5hrs	UP
chr15:8628509-8632539	2.47079	0.0524479	3.07039	0.261218		ENSGALG00000006565	GGT1	gamma-glutamyltransferase_1	5hrs	UP
chr15:8633422-8636407	1.81871	0.213978	1.8003	0.683477		-	-	-	5hrs	UP
chr15:9135655-9141699	3.01136	0.0646906	4.03477	0.254426		ENSGALG00000006766	DEPDC5	DEP_domain_containing_5	5hrs	UP
chr15:10361975-10369066	1.5639	0.139799	1.67631	0.298705		ENSGALG00000007728	PRODH	proline_dehydrogenase_(oxidase)_1	5hrs	UP
chr15:12902358-12907574	1.52326	0.0959993	1.65368	0.278501		-	-	-	5hrs	UP
chr15:12908974-12924175	2.22081	0.064741	3.03477	0.0975415		ENSGALG00000008357	TPCN1	two_pore_segment_channel_1	5hrs	UP
chr15:569351-570381	2.16336	0.0649621	2.03477	0.413075		-	-	-	5hrs	UP
chr15:2740310-2740597	2.33329	0.168457	1.77173	0.799433		-	-	-	5hrs	UP
chr15:6707700-6708232	2.59632	0.119713	2.03477	0.738391		ENSGALG00000004928	SSH1	slingshot_homolog_1_(Drosophila)	5hrs	UP
chr15:7726298-7726790	2.7118	0.101823	2.73521	0.65846		-	-	-	5hrs	UP
chr15:7795925-7796439	3.47079	0.067429	3.4942	0.657924		ENSGALG00000005676	TTC28	tetratricopeptide_repeat_domain_28	5hrs	UP
chr15:8828478-8833041	2.81871	0.371148	2.84212	0.628684		-	LOC416951	LOC416951	5hrs	UP
chr15:9164974-9165376	1.7118	0.245781	1.73521	0.751102		ENSGALG00000006838	LOC416959	similar_to_iron_binding_protein	5hrs	UP
chr17:9301613-9303799	3.59632	0.0566788	3.20469	0.519586		ENSGALG00000001419	DAB2IP	DAB2_interacting_protein	5hrs	UP
chr17:5956641-5957235	1.51386	0.259138	1.53727	0.719053		ENSGALG00000004556	DOLK	dolichol_kinase	5hrs	UP
chr17:8400870-8401352	2.59632	0.119713	2.61973	0.689205		-	LOC772106	similar_to_RP11-426A6.4	5hrs	UP
chr17:9316659-9317018	3.33329	0.0809181	3.35669	0.692965		-	-	-	5hrs	UP
chr17:9317105-9318391	1.55885	0.155657	1.58225	0.51554		-	-	-	5hrs	UP
chr17:9727415-9728362	1.78897	0.156873	1.81237	0.59512		ENSGALG00000001169	CRB2	crumbs_homolog_2_(Drosophila)	5hrs	UP
chr18:9574737-9578298	2.33329	0.12611	2.09366	0.541226		-	TBC1D16	TBC1_domain_family,_member_16	5hrs	UP
chr18:1938526-1987805	3.208	0.0580883	3.45623	0.0800084		ENSGALG00000001227	C17orf38	chromosome_17_open_reading_frame_38	5hrs	UP
chr18:10054865-10057738	2.12684	0.168913	2.4498	0.625431		-	-	-	5hrs	UP
chr18:10270622-10271521	1.59632	0.23124	1.61973	0.59722		-	-	-	5hrs	UP
chr18:4042764-4043189	2.01136	0.121308	2.15024	0.521637		ENSGALG00000001684	SEC14L1	SEC14-like_1_(S._cerevisiae)	5hrs	UP
chr18:4043273-4043817	2.44432	0.0661621	2.46772	0.466488		ENSGALG00000001684	SEC14L1	SEC14-like_1_(S._cerevisiae)	5hrs	UP
chr18:6405503-6406573	1.94996	0.134443	1.97336	0.582144		-	-	-	5hrs	UP
chr18:10571986-10572602	3.59632	0.0566788	3.61973	0.624138		ENSGALG00000007818	CDR2L	cerebellar_degeneration-related_protein_2-like	5hrs	UP
chr18:10573040-10573854	2.33329	0.12611	2.35669	0.652462		-	-	-	5hrs	UP
chr18:10801494-10802056	1.74833	0.27011	1.77173	0.799433		-	-	-	5hrs	UP
chr19:646187-648955	2.59632	0.119713	2.28269	0.594946		ENSGALG00000001049	CASP1	caspase_1,_apoptosis-related_cysteine_peptidase_(interleukin_1,_beta,_convertase)	5hrs	UP
chr19:3190216-3192140	2.33329	0.168457	1.8003	0.683477		ENSGALG00000001546	ZZEF1	zinc_finger,_ZZ-type_with_EF-hand_domain_1	5hrs	UP
chr19:6266965-6269392	2.33329	0.168457	2.94166	0.599898		ENSGALG00000004364	ABR	active_BCR-related	5hrs	UP
chr19:6272164-6272829	1.88583	0.22997	1.88276	0.658876		ENSGALG00000004364	ABR	active_BCR-related	5hrs	UP
chr19:9330389-9332184	3.47079	0.067429	3.20469	0.519586		ENSGALG00000005737	SGSM2	small_G_protein_signaling_modulator_2	5hrs	UP
chr19:449823-451224	1.7118	0.245781	1.94166	0.696216		-	BZRAP1	benzodiazapine_receptor_(peripheral)_associated_protein_1	5hrs	UP
chr19:1304957-1313371	2.2484	0.0695173	1.77173	0.462341		ENSGALG00000001153	AUTS2	autism_susceptibility_candidate_2	5hrs	UP
chr19:1302382-1302874	3.01136	0.0646906	3.20469	0.519586		-	-	-	5hrs	UP
chr19:2798146-2798875	3.33329	0.0809181	3.35669	0.692965		-	-	-	5hrs	UP
chr19:4791864-4792402	2.81871	0.0870836	2.84212	0.628684		-	-	-	5hrs	UP
chr2:1892941-1898742	1.81871	0.213978	1.54934	0.681423		ENSGALG00000005287	ZBTB47	zinc_finger_and_BTB_domain_containing_47	5hrs	UP
chr2:10351871-10356295	2.12684	0.168913	1.5087	0.636305		ENSGALG00000006749	WDR37	WD_repeat_domain_37	5hrs	UP
chr2:30893616-30896305	1.88583	0.22997	2.15024	0.708964		ENSGALG00000023147	-	-	5hrs	UP
chr2:38948008-38950554	1.88583	0.22997	2.15024	0.708964		-	-	-	5hrs	UP
chr2:43837561-43842860	1.85936	0.176211	1.88276	0.658876		ENSGALG00000011938	TRAK1	trafficking_protein,_kinesin_binding_1	5hrs	UP
chr2:53797301-54124918	1.74833	0.47476	1.8003	0.683477		ENSGALG00000012369	TPK1	Thiamin_pyrophosphokinase_1	5hrs	UP
chr2:67457477-67462515	2.59632	0.0837396	2.84212	0.502778		ENSGALG00000012816	SLC22A23	solute_carrier_family_22,_member_23	5hrs	UP
chr2:110176944-110180263	2.12684	0.168913	1.71284	0.708722		-	-	-	5hrs	UP
chr2:143479621-143509139	1.64363	0.158505	1.75723	0.518692		ENSGALG00000016390	ZHX2	zinc_fingers_and_homeoboxes_2	5hrs	UP
chr2:154512876-154515232	1.81871	0.0601706	1.99254	0.170898		ENSGALG00000016141	-	-	5hrs	UP
chr2:6153874-6168416	2.14886	0.111404	2.2978	0.524879		-	WDR86	WD_repeat_domain_86	5hrs	UP
chr2:11269681-11273838	2.27272	0.0923063	1.58731	0.475042		-	-	-	5hrs	UP
chr2:16203438-16208722	2.4264	0.109609	2.09366	0.541226		ENSGALG00000007588	GAD2	Glutamate_decarboxylase_2_(pancreatic_islets_and_brain,_65kDa)	5hrs	UP
chr2:30687436-30716376	2.33329	0.12611	2.92229	0.309635		-	-	-	5hrs	UP
chr2:36518556-36558177	2.67433	0.0735896	2.61973	0.484612		ENSGALG00000011283	ZNF659	zinc_finger_protein_659	5hrs	UP
chr2:47725349-47726149	2.40368	0.0880466	2.30778	0.466269		-	-	-	5hrs	UP
chr2:63881884-63963995	2.12684	0.168913	2.77173	0.525645		-	-	-	5hrs	UP
chr2:91251840-91257153	1.67433	0.206711	1.55833	0.647445		ENSGALG00000019522	LOC771713	similar_to_zinc_finger_protein	5hrs	UP
chr2:91405039-91412282	1.74833	0.0959769	1.59548	0.393215		ENSGALG00000013403	MSANTD3	Myb/SANT-like_DNA-binding_domain_containing_3	5hrs	UP
chr2:106879822-106899021	1.52593	0.501754	1.55833	0.647445		ENSGALG00000015112	ZNF521	zinc_finger_protein_521	5hrs	UP
chr2:107408728-107506901	3.18129	0.273294	2.77173	0.525645		ENSGALG00000015124	KCTD1	potassium_channel_tetramerisation_domain_containing_1	5hrs	UP
chr2:114921599-114927794	2.12243	0.149487	2.15024	0.521637		ENSGALG00000015407	PLAG1	pleiomorphic_adenoma_gene_1	5hrs	UP
chr2:765071-818425	2.59634	0.635016	2.03477	0.738391		ENSGALG00000005072	SCAP	SREBF_chaperone	5hrs	UP
chr2:10373353-10373653	3.59632	0.0566788	2.61973	0.689205		-	-	-	5hrs	UP
chr2:11269681-11273838	3.40368	0.0682835	3.42708	0.218801		-	-	-	5hrs	UP
chr2:11273908-11274547	1.78897	0.156873	1.61973	0.626695		-	-	-	5hrs	UP
chr2:16900992-16901378	3.47079	0.067429	3.4942	0.657924		ENSGALG00000007766	KIAA1217	KIAA1217	5hrs	UP
chr2:30654343-30655297	2.29147	0.0639567	2.31487	0.416512		-	-	-	5hrs	UP
chr2:34529127-34529687	2.59632	0.119713	2.61973	0.689205		ENSGALG00000011248	PLCL2	phospholipase_C-like_2	5hrs	UP
chr2:43843481-43844824	1.56156	0.147384	1.54934	0.509069		-	-	-	5hrs	UP
chr2:46016121-46016682	2.23375	0.145659	1.84212	0.723315		ENSGALG00000012057	TRANK1	tetratricopeptide_repeat_and_ankyrin_repeat_containing_1	5hrs	UP
chr2:50828610-50829029	2.33329	0.168457	2.35669	0.753432		-	-	-	5hrs	UP
chr2:61755775-61756157	2.7118	0.101823	2.73521	0.65846		-	-	-	5hrs	UP
chr2:61756247-61756741	1.59632	0.254537	1.61973	0.734605		-	-	-	5hrs	UP
chr2:61758117-61758864	1.64879	0.167787	1.6722	0.578387		ENSGALG00000012700	RNF182	ring_finger_protein_182	5hrs	UP
chr2:67137636-67164121	1.59632	0.785296	1.69773	0.671045		-	-	-	5hrs	UP
chr2:71831556-71832515	1.76625	0.148857	1.6722	0.578387		-	-	-	5hrs	UP
chr2:72018317-72019085	3.59632	0.0566788	3.73521	0.591651		-	-	-	5hrs	UP
chr2:72434709-72435561	2.01136	0.107568	2.03477	0.517478		-	-	-	5hrs	UP
chr2:72887025-72917811	3.7118	0.318321	3.73521	0.591651		-	-	-	5hrs	UP
chr2:81121957-81122356	2.59632	0.119713	2.03477	0.738391		-	-	-	5hrs	UP
chr2:81369992-81370442	2.18129	0.201979	2.97336	0.459488		-	-	-	5hrs	UP
chr2:84521977-84522461	2.7118	0.101823	2.15024	0.708964		-	-	-	5hrs	UP
chr2:84524452-84560890	3.71178	0.384265	3.73521	0.591651		ENSGALG00000013114	VSTM2A	V-set_and_transmembrane_domain_containing_2A	5hrs	UP
chr2:84524452-84560890	3.41735	0.0659177	3.44076	0.15425		ENSGALG00000013114	VSTM2A	V-set_and_transmembrane_domain_containing_2A	5hrs	UP
chr2:84524452-84560890	1.71179	0.508496	1.73521	0.751102		ENSGALG00000013114	VSTM2A	V-set_and_transmembrane_domain_containing_2A	5hrs	UP
chr2:88122253-88185218	2.01136	0.576418	2.10515	0.588966		ENSGALG00000013189	LPCAT1	lysophosphatidylcholine_acyltransferase_1	5hrs	UP
chr2:91403987-91404934	1.64879	0.167787	1.6722	0.578387		-	-	-	5hrs	UP
chr2:97744732-97755308	3.7118	0.207314	3.78965	0.330464		-	-	-	5hrs	UP
chr2:97744732-97755308	3.53492	0.243227	3.61973	0.385407		-	-	-	5hrs	UP
chr2:104157352-104158111	2.12684	0.168913	1.96076	0.634923		-	-	-	5hrs	UP
chr2:107407985-107408615	2.81871	0.0574148	2.84212	0.502778		-	-	-	5hrs	UP
chr2:107408728-107506901	1.72757	0.331249	1.55833	0.647445		ENSGALG00000015124	KCTD1	potassium_channel_tetramerisation_domain_containing_1	5hrs	UP
chr2:110175865-110176887	2.67433	0.0735896	2.69773	0.549338		-	-	-	5hrs	UP
chr2:114975953-114997234	3.7118	0.673288	3.73521	0.591651		-	CHCHD7	Coiled-coil-helix-coiled-coil-helix_domain_containing_7	5hrs	UP
chr2:125107206-125107759	1.59632	0.283145	1.61973	0.779558		-	-	-	5hrs	UP
chr2:125471133-125472299	2.04378	0.068651	2.06719	0.3727		-	HEY1	hairy/enhancer-of-split_related_with_YRPW_motif_1	5hrs	UP
chr2:129352583-129353052	1.59632	0.283145	1.61973	0.779558		-	-	-	5hrs	UP
chr2:154518212-154518385	3.33329	0.0809181	2.35669	0.753432		-	-	-	5hrs	UP
chr20:4864012-4873334	1.52593	0.0795934	1.73326	0.0980417		ENSGALG00000003750	PLCG1	phospholipase_C,_gamma_1	5hrs	UP
chr20:4879843-4881702	2.07025	0.0591491	2.3758	0.178626		ENSGALG00000003750	PLCG1	phospholipase_C,_gamma_1	5hrs	UP
chr20:6798826-6802101	2.33329	0.12611	2.84212	0.502778		ENSGALG00000004873	PHACTR3	phosphatase_and_actin_regulator_3	5hrs	UP
chr20:10235875-10246455	2.05528	0.0655027	2.22741	0.0915074		ENSGALG00000006662	BPIFB8	Ovocalyxin-36_precursor	5hrs	UP
chr20:949586-955128	1.90444	0.129451	2.07429	0.429277		ENSGALG00000001536	ARHGAP39	Rho_GTPase_activating_protein_39	5hrs	UP
chr20:2198901-2247145	1.59923	0.207263	1.74526	0.304389		ENSGALG00000023971	-	-	5hrs	UP
chr20:10294296-10296491	1.81871	0.166088	1.92229	0.455931		ENSGALG00000006756	BPI	bactericidal/permeability-increasing_protein	5hrs	UP
chr20:12082559-12083284	3.33329	0.0809181	3.35669	0.692965		-	-	-	5hrs	UP
chr20:12086763-12087107	1.88583	0.22997	1.90923	0.768561		-	-	-	5hrs	UP
chr20:13456563-13483690	2.59632	0.739639	2.61973	0.573866		-	-	-	5hrs	UP
chr21:5794043-5795970	1.59632	0.162029	1.52019	0.502702		ENSGALG00000004612	MTHFR	5,10-methylenetetrahydrofolate_reductase_(NADPH)	5hrs	UP
chr21:13205-15430	3.47079	0.067429	2.61973	0.573866		ENSGALG00000000426	IGSF21	immunoglobin_superfamily,_member_21	5hrs	UP
chr21:3022748-3068612	1.59632	0.254537	1.89275	0.530509		-	-	-	5hrs	UP
chr21:3118774-3130077	2.51386	0.0956295	2.20469	0.61918		-	-	-	5hrs	UP
chr21:3234767-3237133	2.7118	0.101823	2.35669	0.652462		ENSGALG00000002473	GPR157	G_protein-coupled_receptor_157	5hrs	UP
chr21:4327373-4328051	1.66344	0.191476	1.52953	0.579419		ENSGALG00000023768	EPHA2	EPH_receptor_A2	5hrs	UP
chr21:4407143-4408103	3.33329	0.0809181	2.25716	0.680312		-	-	-	5hrs	UP
chr21:5779265-5782097	3.09882	0.0561628	3.84212	0.313777		ENSGALG00000004590	CLCN6	chloride_channel_6	5hrs	UP
chr21:5834624-5846629	2.38059	0.062456	2.43686	0.372559		-	C1orf187	chromosome_1_open_reading_frame_187	5hrs	UP
chr21:6619139-6622618	1.93736	0.15659	1.9823	0.536091		ENSGALG00000004878	CCDC30	Coiled-coil_domain_containing_30	5hrs	UP
chr21:321349-322000	2.59632	0.119713	2.61973	0.689205		ENSGALG00000000610	CAMTA1	calmodulin_binding_transcription_activator_1	5hrs	UP
chr21:1653738-1654495	1.91825	0.186843	1.61973	0.734605		-	-	-	5hrs	UP
chr21:4548143-4548682	2.23375	0.145659	2.25716	0.680312		-	-	-	5hrs	UP
chr21:4549011-4550310	1.81871	0.136206	1.84212	0.548753		-	-	-	5hrs	UP
chr22:2368120-2369119	3.33329	0.0809181	3.84212	0.560486		-	LETM2	leucine_zipper-EF-hand_containing_transmembrane_protein_2	5hrs	UP
chr23:1215802-1216108	1.88583	0.149291	1.96765	0.410853		ENSGALG00000000675	CTPS1	CTP_synthase_1	5hrs	UP
chr23:3860334-3860859	1.74833	0.27011	1.77173	0.799433		-	-	-	5hrs	UP
chr24:297209-298270	2.81871	0.0870836	2.28269	0.594946		ENSGALG00000000939	LETM2	Cdon_homolog_(mouse)	5hrs	UP
chr24:462838-465541	1.76138	0.120509	1.81613	0.363297		-	-	-	5hrs	UP
chr24:335062-340548	2.01136	0.19668	3.28269	0.494821		ENSGALG00000000939	CDON	Cdon_homolog_(mouse)	5hrs	UP
chr24:346470-349608	2.67433	0.0735896	3.25716	0.364828		ENSGALG00000000939	CDON	Cdon_homolog_(mouse)	5hrs	UP
chr24:351391-355643	2.59632	0.119713	2.84212	0.628684		ENSGALG00000000939	CDON	Cdon_homolog_(mouse)	5hrs	UP
chr24:387071-388439	2.18129	0.0700191	2.52953	0.209112		-	STT3A	STT3,_subunit_of_the_oligosaccharyltransferase_complex,_homolog_A_(S._cerevisiae)	5hrs	UP
chr24:1194466-1222523	3.33329	0.0809181	2.35669	0.652462		ENSGALG00000001192	ARHGAP32	Rho_GTPase_activating_protein_32	5hrs	UP
chr24:1821070-1822802	2.47079	0.141559	2.28269	0.594946		ENSGALG00000001425	SNX19	sorting_nexin_19	5hrs	UP
chr24:4393009-4394532	2.23375	0.145659	2.4942	0.526597		ENSGALG00000006818	MLL	myeloid/lymphoid_or_mixed-lineage_leukemia_(trithorax_homolog,_Drosophila)	5hrs	UP
chr24:28121-33086	2.59611	0.605042	2.73521	0.65846		ENSGALG00000000285	DPAGT1	dolichyl-phosphate_(UDP-N-acetylglucosamine)_N-acetylglucosaminephosphotransferase_1_(GlcNAc-1-P_transferase)	5hrs	UP
chr24:358228-358463	3.59632	0.0566788	3.61973	0.65846		ENSGALG00000000939	CDON	Cdon_homolog_(mouse)	5hrs	UP
chr24:1806991-1807435	2.33329	0.168457	2.35669	0.753432		-	LOC419734	Similar_to_Sorting_nexin-19	5hrs	UP
chr24:4708559-4709051	2.01136	0.19668	2.03477	0.738391		-	CADM1	cell_adhesion_molecule_1	5hrs	UP
chr25:1386424-1387689	1.51386	0.259138	1.90923	0.603481		ENSGALG00000006259	KIRREL	kin_of_IRRE_like_(Drosophila)	5hrs	UP
chr25:173562-174531	1.74833	0.0803635	1.77173	0.348417		-	-	-	5hrs	UP
chr25:1522558-1523161	3.01136	0.0646906	1.71284	0.708722		ENSGALG00000014638	ASH1L	ash1_(absent,_small,_or_homeotic)-like_(Drosophila)	5hrs	UP
chr26:310289-312396	1.9289	0.102648	1.88276	0.471007		ENSGALG00000000628	KIF21B	kinesin_family_member_21B	5hrs	UP
chr26:27175-28106	2.47079	0.141559	2.25716	0.680312		ENSGALG00000000954	SMPD2	sphingomyelin_phosphodiesterase_2,_neutral_membrane_(neutral_sphingomyelinase)	5hrs	UP
chr26:897458-902049	1.72757	0.173172	1.87127	0.574907		ENSGALG00000000225	MGAT4C	mannosyl_(alpha-1,3-)-glycoprotein_beta-1,4-N-acetylglucosaminyltransferase,_isozyme_C_(putative)	5hrs	UP
chr26:1234686-1239302	1.85443	0.220434	2.15024	0.521637		ENSGALG00000000447	KCNA3	potassium_voltage-gated_channel,_shaker-related_subfamily,_member_3	5hrs	UP
chr26:1585657-1586665	3.59632	0.0566788	4.35669	0.400768		ENSGALG00000000623	PIK3C2B	phosphoinositide-3-kinase,_class_2,_beta_polypeptide	5hrs	UP
chr26:4122893-4125385	2.23375	0.145659	2.55833	0.505251		ENSGALG00000002762	UHRF1BP1	UHRF1_(ICBP90)_binding_protein_1	5hrs	UP
chr26:232027-232226	3.59632	0.0566788	3.73521	0.591651		ENSGALG00000000742	PIM1	pim-1_oncogene	5hrs	UP
chr26:313927-315705	1.67762	0.0746429	1.70103	0.310635		-	-	-	5hrs	UP
chr26:2333525-2334454	2.33329	0.099104	2.42708	0.548657		-	-	-	5hrs	UP
chr26:2569697-2570671	1.85936	0.176211	1.61973	0.694753		-	-	-	5hrs	UP
chr26:3299535-3300428	2.14886	0.111404	1.90923	0.603481		ENSGALG00000001526	CTTNBP2NL	CTTNBP2_N-terminal_like	5hrs	UP
chr26:4792132-4792778	1.77689	0.198743	1.8003	0.683477		-	USP49	ubiquitin_specific_peptidase_49	5hrs	UP
chr27:4017373-4024135	1.59632	0.23124	1.54378	0.53085		ENSGALG00000001682	FBXL20	F-box_and_leucine-rich_repeat_protein_20	5hrs	UP
chr28:2317400-2318066	3.18129	0.0981235	4.4942	0.357245		ENSGALG00000001969	-	-	5hrs	UP
chr28:3551917-3552330	2.47079	0.141559	2.4942	0.720879		ENSGALG00000024269	-	-	5hrs	UP
chr28:3806963-3807681	1.91825	0.186843	1.94166	0.696216		-	-	-	5hrs	UP
chr28:3899095-3931790	2.33317	0.603571	1.77173	0.799433		ENSGALG00000021601	EPS15L1	epidermal_growth_factor_receptor_pathway_substrate_15-like_1	5hrs	UP
chr3:3663781-3670247	2.59632	0.119713	2.53727	0.599231		ENSGALG00000008410	RALGAPA2	Ral_GTPase_activating_protein,_alpha_subunit_2_(catalytic)	5hrs	UP
chr3:4363858-4364590	3.59632	0.0566788	4.12223	0.474909		-	-	-	5hrs	UP
chr3:14429400-14431000	3.59632	0.0566788	2.4498	0.625431		ENSGALG00000009020	JAG1	jagged_1_(Alagille_syndrome)	5hrs	UP
chr3:18007909-18009514	3.47079	0.067429	3.61973	0.624138		ENSGALG00000009155	CHGB	chromogranin_B_(secretogranin_1)	5hrs	UP
chr3:39796499-39799579	1.67433	0.206711	1.92785	0.555232		ENSGALG00000014327	ARID4B	AT_rich_interactive_domain_4B_(RBP1-like)	5hrs	UP
chr3:49798208-49847159	2.7118	0.101823	1.61973	0.734605		ENSGALG00000012345	UST	uronyl-2-sulfotransferase	5hrs	UP
chr3:53713064-53727117	2.12684	0.168913	2.03477	0.669821		-	SYNJ2	Synaptojanin_2	5hrs	UP
chr3:68595090-68646691	1.61803	0.257122	2.30778	0.156517		ENSGALG00000015022	FYN	FYN_oncogene_related_to_SRC,_FGR,_YES	5hrs	UP
chr3:69351619-69375931	1.73383	0.0746551	2.1363	0.144064		ENSGALG00000015066	WASF1	WAS_protein_family,_member_1	5hrs	UP
chr3:107408247-107408558	1.7118	0.245781	1.61973	0.694753		-	-	-	5hrs	UP
chr3:77737-89442	3.33329	0.0809181	4.28269	0.424263		ENSGALG00000008104	CCDC88A	coiled-coil_domain_containing_88A	5hrs	UP
chr3:15170168-15175834	2.12684	0.168913	2.55833	0.505251		ENSGALG00000008875	PLCB1	phospholipase_C,_beta_1_(phosphoinositide-specific)	5hrs	UP
chr3:16760918-16769723	2.01136	0.163633	1.94166	0.512753		-	ACSS1	Acyl-CoA_synthetase_short-chain_family_member_1	5hrs	UP
chr3:17368250-17372880	1.59632	0.21204	1.58225	0.51554		-	-	-	5hrs	UP
chr3:62760857-62838452	2.7118	0.101823	2.84212	0.502778		ENSGALG00000014844	NKAIN2	Na+/K+_transporting_ATPase_interacting_2	5hrs	UP
chr3:67445901-67472523	2.01136	0.92658	2.35669	0.882832		ENSGALG00000014991	HDAC2	histone_deacetylase_2	5hrs	UP
chr3:79687366-79689913	2.91825	0.0748692	4.12223	0.474909		ENSGALG00000015833	NT5E	5'-nucleotidase,_ecto_(CD73)	5hrs	UP
chr3:89625688-89627441	2.33329	0.168457	3.4942	0.657924		ENSGALG00000016283	BEND6	BEN_domain_containing_6	5hrs	UP
chr3:108177944-108186504	2.47079	0.0524479	3.00439	0.228008		ENSGALG00000016605	EFR3B	EFR3_homolog_B_(S._cerevisiae)	5hrs	UP
chr3:32406-32868	3.59632	0.0566788	3.61973	0.624138		-	-	-	5hrs	UP
chr3:34279-46843	1.74833	0.490495	1.77173	0.799433		ENSGALG00000008104	CCDC88A	coiled-coil_domain_containing_88A	5hrs	UP
chr3:34279-46843	3.7118	0.330444	2.73521	0.65846		ENSGALG00000008104	CCDC88A	coiled-coil_domain_containing_88A	5hrs	UP
chr3:2859536-2860100	3.47079	0.067429	3.4942	0.657924		-	-	-	5hrs	UP
chr3:4598350-4598665	2.47079	0.141559	2.4942	0.720879		-	-	-	5hrs	UP
chr3:13479178-13479725	1.93736	0.15659	1.96076	0.634923		-	-	-	5hrs	UP
chr3:16756743-16757394	1.81871	0.213978	1.84212	0.723315		-	ACSS1	Acyl-CoA_synthetase_short-chain_family_member_1	5hrs	UP
chr3:30341779-30342094	2.47079	0.141559	2.4942	0.720879		ENSGALG00000010065	KCNK5	potassium_channel,_subfamily_K,_member_5	5hrs	UP
chr3:49848279-49849414	1.78897	0.156873	1.81237	0.59512		-	-	-	5hrs	UP
chr3:50536362-50536881	1.59632	0.283145	1.61973	0.779558		ENSGALG00000012395	PLEKHG1	Pleckstrin_homology_domain_containing,_family_G_(with_RhoGef_domain)_member_1	5hrs	UP
chr3:51736022-51736348	3.33329	0.0809181	3.35669	0.692965		-	-	-	5hrs	UP
chr3:56852723-56853177	2.59632	0.119713	2.15024	0.708964		-	-	-	5hrs	UP
chr3:58484514-58484947	2.01136	0.244223	1.71284	0.708722		-	-	-	5hrs	UP
chr3:65639338-65639853	2.01136	0.19668	2.15024	0.708964		-	-	-	5hrs	UP
chr3:88642204-88642303	2.53492	0.0700593	2.97336	0.459488		-	-	-	5hrs	UP
chr3:95282309-95282846	2.88583	0.0509619	3.42708	0.448234		-	-	-	5hrs	UP
chr3:96341371-96377841	3.33329	0.612582	4.42708	0.378443		-	-	-	5hrs	UP
chr3:101090557-101090957	2.12684	0.0994034	2.35669	0.504792		-	-	-	5hrs	UP
chr3:109009710-109010602	1.77035	0.103934	1.87607	0.421299		-	-	-	5hrs	UP
chr3:112526918-112527291	1.93736	0.15659	2.28269	0.594946		-	-	-	5hrs	UP
chr4:5316914-5380323	1.74366	0.140875	1.51692	0.147612		-	-	-	5hrs	UP
chr4:21904873-21906871	2.33329	0.168457	2.03477	0.669821		ENSGALG00000009361	GUCY1B3	guanylate_cyclase_1,_soluble,_beta_3	5hrs	UP
chr4:26254315-26270759	1.59632	0.283145	1.94166	0.696216		ENSGALG00000009650	PALLD	palladin,_cytoskeletal_associated_protein	5hrs	UP
chr4:26282225-26285716	3.01136	0.0646906	2.69773	0.549338		ENSGALG00000009650	PALLD	palladin,_cytoskeletal_associated_protein	5hrs	UP
chr4:35160750-35164257	1.88583	0.22997	3.4942	0.426373		-	-	-	5hrs	UP
chr4:47081530-47084920	1.7118	0.245781	2.12223	0.644139		ENSGALG00000010909	PRKG2	protein_kinase,_cGMP-dependent,_type_II	5hrs	UP
chr4:56586911-56597574	2.33329	0.168457	2.94166	0.599898		-	-	-	5hrs	UP
chr4:58680045-58686668	1.94425	0.0844439	3.20469	0.132761		ENSGALG00000012068	LOC428770	prematurely_terminated_mRNA_decay_factor-like	5hrs	UP
chr4:68240018-68262160	1.56775	0.12631	1.83313	0.257719		ENSGALG00000014103	FRYL	FRY-like	5hrs	UP
chr4:68265516-68267879	1.54187	0.199474	1.6628	0.528739		ENSGALG00000014103	FRYL	FRY-like	5hrs	UP
chr4:78801956-78854503	1.52593	0.303336	1.90923	0.603481		ENSGALG00000014479	FAM184B	family_with_sequence_similarity_184,_member_B	5hrs	UP
chr4:78801956-78854503	1.68943	0.326908	2.61973	0.234641		ENSGALG00000014479	FAM184B	family_with_sequence_similarity_184,_member_B	5hrs	UP
chr4:85768810-85784752	2.12684	0.168913	2.10515	0.588966		ENSGALG00000015687	ZFYVE28	zinc_finger,_FYVE_domain_containing_28	5hrs	UP
chr4:2854118-2855311	3.47079	0.067429	2.84212	0.628684		-	LRCH2	leucine-rich_repeats_and_calponin_homology_(CH)_domain_containing_2	5hrs	UP
chr4:29771405-29777664	1.74833	0.27011	1.61973	0.734605		ENSGALG00000009732	PCDH18	protocadherin_18	5hrs	UP
chr4:31297613-31383915	2.74833	0.0648931	2.73521	0.315861		ENSGALG00000009880	INPP4B	inositol_polyphosphate-4-phosphatase,_type_II,_105kDa	5hrs	UP
chr4:35919309-35920461	1.81871	0.295918	1.71284	0.708722		ENSGALG00000010316	FRAS1	Fraser_syndrome_1	5hrs	UP
chr4:46737126-46738931	2.33329	0.168457	2.12223	0.644139		ENSGALG00000010892	ANTXR2	Anthrax_toxin_receptor_2	5hrs	UP
chr4:66793091-66795616	2.12684	0.168913	2.84212	0.628684		ENSGALG00000013776	CEP135	centrosomal_protein_135kDa	5hrs	UP
chr4:85061407-85075035	1.7118	0.245781	2.25716	0.680312		ENSGALG00000015626	RGS12	regulator_of_G-protein_signalling_12	5hrs	UP
chr4:85725200-85759823	1.51775	0.301204	1.72664	0.457824		ENSGALG00000015687	ZFYVE28	zinc_finger,_FYVE_domain_containing_28	5hrs	UP
chr4:89250549-89252502	2.01136	0.163633	1.96076	0.634923		-	-	-	5hrs	UP
chr4:93271994-93275468	3.03244	0.0661467	3.18677	0.0862672		ENSGALG00000016090	GNOT1	GNOT1_homeodomain_protein	5hrs	UP
chr4:60663-61204	2.33329	0.168457	2.35669	0.753432		ENSGALG00000004715	ZC3H12B	zinc_finger_CCCH-type_containing_12B	5hrs	UP
chr4:1556222-1556747	1.77689	0.198743	1.8003	0.683477		-	-	-	5hrs	UP
chr4:1828848-1829125	2.33329	0.168457	2.35669	0.753432		ENSGALG00000004739	DGKK	diacylglycerol_kinase,_kappa	5hrs	UP
chr4:3049102-3049674	2.51386	0.0956295	2.53727	0.599231		-	-	-	5hrs	UP
chr4:3399958-3400629	2.12684	0.168913	2.15024	0.708964		-	-	-	5hrs	UP
chr4:5316914-5380323	2.7118	0.485475	2.73521	0.65846		-	-	-	5hrs	UP
chr4:10593059-10593533	1.64363	0.158505	1.66703	0.552584		ENSGALG00000007245	-	-	5hrs	UP
chr4:11795524-11796120	2.33329	0.168457	2.35669	0.753432		-	-	-	5hrs	UP
chr4:12473548-12474137	2.25929	0.111859	2.28269	0.594946		ENSGALG00000007755	KIAA2022	KIAA2022	5hrs	UP
chr4:13412725-13413582	2.4264	0.109609	2.4498	0.625431		-	DCX	doublecortex	5hrs	UP
chr4:17502988-17503356	1.74833	0.27011	1.77173	0.799433		-	RNF128	Ring_finger_protein_128	5hrs	UP
chr4:21244419-21244694	3.33329	0.0809181	3.35669	0.692965		-	-	-	5hrs	UP
chr4:25989973-25990258	3.18129	0.0981235	3.61973	0.624138		-	-	-	5hrs	UP
chr4:26286769-26287678	1.69942	0.154166	1.57082	0.588203		ENSGALG00000009650	PALLD	palladin,_cytoskeletal_associated_protein	5hrs	UP
chr4:29777765-29778374	3.47079	0.067429	3.4942	0.657924		-	-	-	5hrs	UP
chr4:30907100-30907853	1.91825	0.186843	2.12223	0.644139		-	-	-	5hrs	UP
chr4:31212451-31213274	1.68943	0.224665	1.8003	0.683477		-	-	-	5hrs	UP
chr4:40218850-40219406	2.33329	0.168457	2.20469	0.78679		ENSGALG00000010592	TET2	tet_methylcytosine_dioxygenase_2	5hrs	UP
chr4:47088023-47088564	1.59632	0.283145	1.90923	0.768561		-	-	-	5hrs	UP
chr4:47191022-47191754	1.51386	0.259138	1.53727	0.719053		ENSGALG00000011017	KLHL8	kelch-like_8_(Drosophila)	5hrs	UP
chr4:58668813-58669840	1.94996	0.134443	1.90923	0.603481		-	-	-	5hrs	UP
chr4:63363111-63363813	2.91825	0.0748692	2.94166	0.599898		-	-	-	5hrs	UP
chr4:63365616-63366250	3.59632	0.0566788	3.4942	0.657924		-	-	-	5hrs	UP
chr4:63369242-63369885	2.59632	0.119713	3.4942	0.657924		-	-	-	5hrs	UP
chr4:71622115-71631013	2.01136	0.425552	2.61973	0.689205		-	-	-	5hrs	UP
chr4:71622115-71631013	2.01136	0.361911	2.53727	0.599231		-	-	-	5hrs	UP
chr4:72745579-72746453	1.7118	0.245781	2.15024	0.708964		-	-	-	5hrs	UP
chr4:72753914-72754865	2.01136	0.163633	2.4498	0.625431		-	-	-	5hrs	UP
chr4:74183626-74198544	5.14064	0.107032	5.20469	0.155555		-	-	-	5hrs	UP
chr4:74591361-74620705	3.81871	0.631079	2.84212	0.628684		-	-	-	5hrs	UP
chr4:74591361-74620705	1.59632	0.698577	1.94166	0.696216		-	-	-	5hrs	UP
chr4:74591361-74620705	1.7118	0.706289	1.73521	0.751102		-	-	-	5hrs	UP
chr4:74591361-74620705	1.94996	0.589778	1.97336	0.582144		-	-	-	5hrs	UP
chr4:74622377-74622951	1.59632	0.318934	1.84212	0.723315		-	-	-	5hrs	UP
chr4:82907058-82907734	1.91825	0.186843	1.94166	0.696216		ENSGALG00000015547	TADA2B	transcriptional_adaptor_2B	5hrs	UP
chr4:85796786-85797930	2.44432	0.0661621	2.03477	0.517478		-	ZFYVE28	zinc_finger,_FYVE_domain_containing_28	5hrs	UP
chr4:86228849-86297170	2.67433	0.626972	2.69773	0.549338		ENSGALG00000015705	WHSC1	Wolf-Hirschhorn_syndrome_candidate_1	5hrs	UP
chr4:86228849-86297170	1.81871	0.723141	1.84212	0.723315		ENSGALG00000015705	WHSC1	Wolf-Hirschhorn_syndrome_candidate_1	5hrs	UP
chr4:86228849-86297170	1.85936	0.684075	1.61973	0.694753		ENSGALG00000015705	WHSC1	Wolf-Hirschhorn_syndrome_candidate_1	5hrs	UP
chr5:1908838-1942297	2.47079	0.141559	2.42708	0.548657		-	NAV2	neuron_navigator_2	5hrs	UP
chr5:14108120-14133260	2.4264	0.109609	2.53727	0.599231		ENSGALG00000006401	OSBPL5	oxysterol_binding_protein-like_5	5hrs	UP
chr5:24369437-24391672	1.63027	0.105828	1.68684	0.169303		ENSGALG00000008053	PRDM11	PR_domain_containing_11	5hrs	UP
chr5:29552922-29583712	2.59632	0.0837396	2.17227	0.56696		ENSGALG00000012248	MAP3K9	mitogen-activated_protein_kinase_kinase_kinase_9	5hrs	UP
chr5:41551061-41551647	2.47079	0.141559	1.61973	0.734605		ENSGALG00000010406	TMEM63C	Transmembrane_protein_63C	5hrs	UP
chr5:58374937-58375137	2.81871	0.0870836	2.84212	0.628684		ENSGALG00000027720	OTX2	orthodenticle_homeobox_2	5hrs	UP
chr5:379179-380030	2.01136	0.244223	3.28269	0.494821		ENSGALG00000020513	MS4A15	membrane-spanning_4-domains,_subfamily_A,_member_15	5hrs	UP
chr5:1505739-1512671	2.0369	0.0533869	2.15676	0.218293		ENSGALG00000004328	IGHMBP2	immunoglobulin_mu_binding_protein_2	5hrs	UP
chr5:38356675-38358683	2.33329	0.168457	2.20469	0.78679		ENSGALG00000010030	BAZ1A	bromodomain_adjacent_to_zinc_finger_domain,_1A	5hrs	UP
chr5:48899100-48901844	3.33329	0.0809181	2.15024	0.708964		ENSGALG00000011085	ATG2B	ATG2_autophagy_related_2_homolog_B_(S._cerevisiae)	5hrs	UP
chr5:48901895-48905463	1.85936	0.176211	2.03477	0.561393		ENSGALG00000011085	ATG2B	ATG2_autophagy_related_2_homolog_B_(S._cerevisiae)	5hrs	UP
chr5:55686414-55690040	2.81871	0.0870836	2.69773	0.549338		-	-	-	5hrs	UP
chr5:58952416-58956091	1.91825	0.186843	1.55833	0.647445		-	SAMD4A	sterile_alpha_motif_domain_containing_4A	5hrs	UP
chr5:60514141-60533611	2.40368	0.0880466	3.4942	0.28772		ENSGALG00000012361	NIN	Ninein_(GSK3B_interacting_protein)	5hrs	UP
chr5:14150193-14151000	1.81871	0.166088	1.77173	0.64793		-	-	-	5hrs	UP
chr5:16799255-16799735	2.7118	0.101823	1.61973	0.779558		-	-	-	5hrs	UP
chr5:24369437-24391672	2.4264	0.48383	2.35669	0.652462		ENSGALG00000008053	PRDM11	PR_domain_containing_11	5hrs	UP
chr5:24393079-24393566	2.47079	0.141559	1.77173	0.799433		-	-	-	5hrs	UP
chr5:28241756-28242342	2.01136	0.19668	1.90923	0.768561		-	-	-	5hrs	UP
chr5:28323842-28324177	2.47079	0.141559	1.77173	0.799433		ENSGALG00000009282	ELMSAN1	ELM2_and_Myb/SANT-like_domain_containing_1	5hrs	UP
chr5:29601920-29602414	2.33329	0.168457	2.20469	0.78679		-	-	-	5hrs	UP
chr5:29604840-29605613	2.33329	0.12611	2.25716	0.680312		-	-	-	5hrs	UP
chr5:41005663-41006131	1.7118	0.245781	1.61973	0.779558		-	-	-	5hrs	UP
chr5:52052709-52053099	3.33329	0.0809181	1.61973	0.830958		ENSGALG00000011365	WDR20	WD_repeat_domain_20	5hrs	UP
chr5:52085189-52088385	3.7118	0.43289	3.61973	0.624138		ENSGALG00000020379	C14orf131	chromosome_14_open_reading_frame_131	5hrs	UP
chr5:52845658-52867885	3.33329	0.558141	3.20469	0.729188		ENSGALG00000011522	TRMT61A	tRNA_methyltransferase_61A_(Trmt61a),_transcript_variant_3	5hrs	UP
chr5:57079009-57106031	1.59632	0.756571	1.84212	0.723315		ENSGALG00000011917	PPM1A	protein_phosphatase_1A_(formerly_2C),_magnesium-dependent,_alpha_isoform	5hrs	UP
chr5:57079009-57106031	3.18129	0.629544	1.96076	0.634923		ENSGALG00000011917	PPM1A	protein_phosphatase_1A_(formerly_2C),_magnesium-dependent,_alpha_isoform	5hrs	UP
chr5:60342558-60342897	3.33329	0.0809181	3.35669	0.692965		-	-	-	5hrs	UP
chr6:13056512-13059902	1.66344	0.121172	1.71926	0.440103		-	CHST3	carbohydrate_(chondroitin_6)_sulfotransferase_3	5hrs	UP
chr6:29197165-29204684	2.33329	0.099104	2.89275	0.391632		ENSGALG00000008980	COL9A3	collagen,_type_IX,_alpha_3	5hrs	UP
chr6:29781728-29837738	3.47079	0.067429	3.20469	0.519586		-	ATRNL1	attractin-like_1	5hrs	UP
chr6:33514011-33524830	1.84144	0.120405	1.9523	0.475019		ENSGALG00000009704	CHST15	carbohydrate_(N-acetylgalactosamine_4-sulfate_6-O)_sulfotransferase_15	5hrs	UP
chr6:8246278-8246592	3.47079	0.067429	3.90923	0.167548		-	-	-	5hrs	UP
chr6:11723867-11740134	3.47079	0.534261	3.4942	0.657924		ENSGALG00000004065	SLC25A16	solute_carrier_family_25_(mitochondrial_carrier;_Graves_disease_autoantigen),_member_16	5hrs	UP
chr6:11816577-11817067	1.81871	0.213978	1.84212	0.723315		-	-	-	5hrs	UP
chr6:18841302-18841725	2.23375	0.145659	1.84212	0.723315		ENSGALG00000005893	ZFAND4	zinc_finger,_AN1-type_domain_4_(ZFAND4),_transcript_variant_2	5hrs	UP
chr6:24163940-24164721	1.81871	0.166088	1.84212	0.625409		-	FBXW4	F-box_and_WD_repeat_domain_containing_4	5hrs	UP
chr6:25703154-25704109	1.67433	0.206711	1.69773	0.671045		-	KIAA1754	KIAA1754	5hrs	UP
chr6:29554165-29554841	1.68943	0.224665	1.71284	0.708722		-	-	-	5hrs	UP
chr6:33717712-33718279	2.12684	0.168913	2.03477	0.669821		ENSGALG00000023406	NKX1-2	NK1_homeobox_2	5hrs	UP
chr7:12485501-12490818	2.12684	0.168913	2.2364	0.5456		ENSGALG00000008305	CASP10	caspase_10,_apoptosis-related_cysteine_peptidase	5hrs	UP
chr7:13462124-13463841	2.7118	0.101823	2.84212	0.628684		ENSGALG00000008548	MDH1B	malate_dehydrogenase_1B,_NAD_(soluble)	5hrs	UP
chr7:14903619-14912835	2.7118	0.101823	4.4942	0.357245		ENSGALG00000008842	PIP5K3	phosphatidylinositol-3-phosphate/phosphatidylinositol_5-kinase,_type_III	5hrs	UP
chr7:14939542-14941083	2.33329	0.099104	2.42708	0.548657		ENSGALG00000008842	PIP5K3	phosphatidylinositol-3-phosphate/phosphatidylinositol_5-kinase,_type_III	5hrs	UP
chr7:14954330-14956564	3.33329	0.0809181	4.12223	0.474909		ENSGALG00000008842	PIP5K3	phosphatidylinositol-3-phosphate/phosphatidylinositol_5-kinase,_type_III	5hrs	UP
chr7:16177590-16227667	2.0275	0.0916996	1.57682	0.0718013		-	CCDC141	coiled-coil_domain_containing_141	5hrs	UP
chr7:21133646-21137194	2.23375	0.145659	1.61973	0.694753		ENSGALG00000010943	SCN1A	sodium_channel,_voltage-gated,_type_I,_alpha_subunit	5hrs	UP
chr7:21138423-21146099	1.50612	0.188725	1.52662	0.482888		ENSGALG00000010943	SCN1A	sodium_channel,_voltage-gated,_type_I,_alpha_subunit	5hrs	UP
chr7:25211913-25214357	1.67433	0.206711	2.10515	0.588966		ENSGALG00000011532	CYP27C1	cytochrome_P450,_family_27,_subfamily_C,_polypeptide_1	5hrs	UP
chr7:10841439-10845923	1.74833	0.27011	1.61973	0.734605		ENSGALG00000007944	HECW2	HECT,_C2_and_WW_domain_containing_E3_ubiquitin_protein_ligase_2	5hrs	UP
chr7:11341190-11386722	3.33329	0.0809181	2.84212	0.628684		ENSGALG00000008113	PLCL1	phospholipase_C-like_1	5hrs	UP
chr7:13518037-13584488	1.84007	0.105144	2.19231	0.0525173		-	-	-	5hrs	UP
chr7:32376680-32379364	1.77689	0.0902133	2.03477	0.315368		-	-	-	5hrs	UP
chr7:5183500-5184049	2.47079	0.141559	2.4942	0.720879		-	-	-	5hrs	UP
chr7:5897626-5898465	1.67433	0.206711	1.69773	0.671045		-	-	-	5hrs	UP
chr7:11390347-11390931	3.59632	0.0566788	3.61973	0.624138		ENSGALG00000008113	PLCL1	phospholipase_C-like_1	5hrs	UP
chr7:12236628-12237178	2.7118	0.101823	2.73521	0.65846		-	-	-	5hrs	UP
chr7:14962510-14963300	1.59632	0.23124	1.61973	0.694753		-	-	-	5hrs	UP
chr7:14963595-14964744	1.90444	0.129451	1.92785	0.555232		-	-	-	5hrs	UP
chr7:16177590-16227667	2.33329	0.379305	2.35669	0.504792		-	CCDC141	coiled-coil_domain_containing_141	5hrs	UP
chr7:16531946-16532601	2.7118	0.101823	2.94166	0.599898		ENSGALG00000009172	OSBPL6	oxysterol_binding_protein-like_6	5hrs	UP
chr7:16783447-16784303	2.28438	0.0748265	2.08539	0.499387		ENSGALG00000009224	TTC30A	tetratricopeptide_repeat_domain_30A	5hrs	UP
chr7:20408639-20409168	2.12684	0.168913	1.73521	0.751102		-	-	-	5hrs	UP
chr7:36402106-36468960	2.47079	0.62022	3.4942	0.657924		ENSGALG00000012462	KIF5C	kinesin_family_member_5C	5hrs	UP
chr8:6396498-6397431	3.33329	0.0809181	3.61973	0.624138		ENSGALG00000004032	LOC424420	similar_to_ADAMTS-like_2	5hrs	UP
chr8:6398840-6400967	1.51386	0.259138	1.55833	0.647445		ENSGALG00000004032	LOC424420	similar_to_ADAMTS-like_2	5hrs	UP
chr8:20423811-20427737	2.33329	0.168457	2.94166	0.599898		ENSGALG00000009994	KIAA0467	KIAA0467	5hrs	UP
chr8:3589874-3592669	2.14886	0.111404	2.30778	0.466269		ENSGALG00000002540	RGS2	regulator_of_G-protein_signaling_2,_24kDa	5hrs	UP
chr8:5271519-5274808	1.81871	0.213978	2.84212	0.336703		-	-	-	5hrs	UP
chr8:6547373-6551960	1.65522	0.178577	1.99412	0.459346		ENSGALG00000004216	TOR3A	torsin_family_3,_member_A	5hrs	UP
chr8:21075979-21078352	1.68121	0.139537	1.58731	0.475042		ENSGALG00000010089	DPH2	DPH2_homolog_(S._cerevisiae)	5hrs	UP
chr8:22149041-22151664	2.09882	0.143729	3.4942	0.426373		ENSGALG00000010335	PIK3R3	Phosphoinositide-3-kinase,_regulatory_subunit_3_(p55,_gamma)	5hrs	UP
chr8:22154647-22174390	1.7118	0.245781	3.28269	0.494821		ENSGALG00000010335	PIK3R3	Phosphoinositide-3-kinase,_regulatory_subunit_3_(p55,_gamma)	5hrs	UP
chr8:28279831-28282057	1.76625	0.148857	1.88276	0.471007		ENSGALG00000010967	DOCK7	dedicator_of_cytokinesis_7	5hrs	UP
chr8:28316336-28335340	2.25929	0.0696727	3.15815	0.144226		ENSGALG00000010967	DOCK7	dedicator_of_cytokinesis_7	5hrs	UP
chr8:28337272-28341877	2.59632	0.0627454	3.24422	0.274859		ENSGALG00000010967	DOCK7	dedicator_of_cytokinesis_7	5hrs	UP
chr8:28343140-28360330	2.01136	0.121308	2.96076	0.296836		ENSGALG00000010967	DOCK7	dedicator_of_cytokinesis_7	5hrs	UP
chr8:1190468-1190875	1.81871	0.213978	1.84212	0.723315		-	SLC25A24	Solute_carrier_family_25_(mitochondrial_carrier;_phosphate_carrier),_member_24	5hrs	UP
chr8:1191321-1191826	2.01136	0.19668	1.61973	0.779558		-	SLC25A24	Solute_carrier_family_25_(mitochondrial_carrier;_phosphate_carrier),_member_24	5hrs	UP
chr8:4104142-4104656	2.47079	0.141559	2.4942	0.720879		ENSGALG00000002894	PACS2	phosphofurin_acidic_cluster_sorting_protein_2	5hrs	UP
chr8:5984515-5985328	2.74833	0.0648931	2.77173	0.525645		-	-	-	5hrs	UP
chr8:6140141-6140589	2.33329	0.168457	2.35669	0.753432		-	-	-	5hrs	UP
chr8:15770757-15771386	2.33329	0.12611	2.35669	0.652462		ENSGALG00000020805	LRRC8D	leucine_rich_repeat_containing_8_family,_member_D	5hrs	UP
chr8:20888484-20889158	2.91825	0.0748692	2.94166	0.599898		-	-	-	5hrs	UP
chr8:21445165-21445578	3.47079	0.067429	2.4942	0.720879		-	TMEM53	transmembrane_protein_53	5hrs	UP
chr8_random:352007-355318	1.65522	0.178577	2.24422	0.401553		ENSGALG00000005141	HMCN1	Hemicentin_1	5hrs	UP
chr8_random:103023-103904	1.59632	0.254537	1.61973	0.734605		-	-	-	5hrs	UP
chr9:21081326-21092327	1.50886	0.142364	1.86258	0.283204		-	PLD1	phospholipase_D1,_phosphatidylcholine-specific	5hrs	UP
chr9:21096184-21103167	1.61402	0.0760892	1.87348	0.211763		-	PLD1	phospholipase_D1,_phosphatidylcholine-specific	5hrs	UP
chr9:21473685-21475331	1.78897	0.156873	2.1343	0.481811		ENSGALG00000023616	LRRC31	leucine_rich_repeat_containing_31	5hrs	UP
chr9:23809892-23811878	2.44432	0.0661621	2.71926	0.274357		-	-	-	5hrs	UP
chr9:23812161-23815018	1.55733	0.0937115	1.69188	0.281987		-	LOC425015	similar_to_caspase_recruitment_domain_protein_7	5hrs	UP
chr9:2514083-2680845	1.71763	0.0818508	1.75723	0.325327		ENSGALG00000002155	HS6ST1	heparan_sulfate_6-O-sulfotransferase_1	5hrs	UP
chr9:4673259-4674503	2.09882	0.143729	2.03477	0.611619		ENSGALG00000006649	TMEM41A	transmembrane_protein_41A	5hrs	UP
chr9:5892139-5894299	3.33329	0.0809181	3.20469	0.519586		ENSGALG00000006221	KIF1A	kinesin_family_member_1A	5hrs	UP
chr9:5904214-5906538	1.74833	0.27011	1.8003	0.683477		ENSGALG00000006221	KIF1A	kinesin_family_member_1A	5hrs	UP
chr9:5907841-5909171	2.7118	0.101823	2.35669	0.571439		ENSGALG00000006221	KIF1A	kinesin_family_member_1A	5hrs	UP
chr9:6172010-6176576	1.63939	0.060728	1.74258	0.136692		ENSGALG00000005768	ETV5	ets_variant_gene_5_(ets-related_molecule)	5hrs	UP
chr9:16811220-16813169	2.7118	0.101823	2.94166	0.599898		ENSGALG00000008310	CAPN10	calpain_10	5hrs	UP
chr9:17958971-17961421	3.01136	0.0646906	4.20469	0.448964		-	-	-	5hrs	UP
chr9:4453184-4453415	2.08175	0.12451	2.10515	0.588966		-	-	-	5hrs	UP
chr9:4669592-4670174	1.74833	0.27011	1.77173	0.799433		-	-	-	5hrs	UP
chr9:5803424-5804137	1.65522	0.178577	1.5087	0.636305		-	-	-	5hrs	UP
chr9:5883225-5883660	1.88583	0.22997	1.90923	0.768561		-	KIF1A	kinesin_family_member_1A	5hrs	UP
chr9:6063377-6106340	1.88583	0.523805	1.90923	0.768561		ENSGALG00000005788	FARP2	FERM,_RhoGEF_and_pleckstrin_domain_protein_2	5hrs	UP
chr9:15011990-15013165	2.54741	0.0545664	2.57082	0.430616		-	-	-	5hrs	UP
chrUn_random:5960749-5961923	1.76625	0.148857	1.89275	0.530509		-	-	-	5hrs	UP
chrUn_random:8292711-8293571	3.33329	0.0809181	3.42708	0.448234		-	LOC777513	Similar_to_alpha-2_type_IX_collagen	5hrs	UP
chrUn_random:10383478-10384590	3.33329	0.0809181	1.54934	0.681423		-	-	-	5hrs	UP
chrUn_random:11762530-11763112	2.59632	0.189774	2.61973	0.843571		-	SERINC2	serine_incorporator_2	5hrs	UP
chrUn_random:14318415-14319452	2.01136	0.244223	2.03477	0.413075		-	-	-	5hrs	UP
chrUn_random:14642975-14643380	1.59632	0.283145	1.84212	0.723315		-	COASY	Coenzyme_A_synthase	5hrs	UP
chrUn_random:15669763-15670728	1.65522	0.178577	2.22239	0.374057		-	-	-	5hrs	UP
chrUn_random:22758701-22759924	3.33329	0.0809181	3.78965	0.330464		-	LOC776410	Similar_to_seven_transmembrane_helix_receptor	5hrs	UP
chrUn_random:23138875-23139829	1.94425	0.0844439	2.05362	0.225625		-	-	-	5hrs	UP
chrUn_random:33411735-33417757	2.01136	0.19668	1.84212	0.486489		-	-	-	5hrs	UP
chrUn_random:36166195-36166418	3.59632	0.0566788	3.73521	0.591651		-	-	-	5hrs	UP
chrUn_random:39877852-39880192	2.81871	0.149909	2.35669	0.571439		-	-	-	5hrs	UP
chrUn_random:42557848-42558664	2.18129	0.126614	2.03477	0.478676		ENSGALG00000022166	PNKD	paroxysmal_nonkinesigenic_dyskinesia	5hrs	UP
chrUn_random:52920029-52923075	1.52593	0.235165	1.5087	0.636305		ENSGALG00000000463	DDX25	DEAD_(Asp-Glu-Ala-Asp)_box_polypeptide_25	5hrs	UP
chrUn_random:55067278-55068033	3.47079	0.067429	4.12223	0.474909		-	-	-	5hrs	UP
chrUn_random:55199134-55199904	2.53492	0.0700593	3.25716	0.364828		-	-	-	5hrs	UP
chrUn_random:55201726-55202355	2.47079	0.141559	2.28269	0.594946		-	-	-	5hrs	UP
chrUn_random:2999615-3000005	1.59632	0.44638	1.61973	0.96075		-	SCX	class_II_bHLH_protein_scleraxis	5hrs	UP
chrUn_random:4408335-4408702	2.47079	0.141559	1.94166	0.696216		-	-	-	5hrs	UP
chrUn_random:4544272-4545279	2.09882	0.143729	2.52019	0.448253		-	-	-	5hrs	UP
chrUn_random:9586407-9587048	1.74833	0.27011	2.35669	0.652462		-	-	-	5hrs	UP
chrUn_random:15334328-15335837	2.7118	0.101823	2.35669	0.652462		-	-	-	5hrs	UP
chrUn_random:17756197-17757636	3.47079	0.067429	4.42708	0.378443		-	-	-	5hrs	UP
chrUn_random:19613487-19614554	2.59632	0.189774	2.69773	0.328721		-	-	-	5hrs	UP
chrUn_random:20415660-20416182	2.21299	0.0999011	2.2978	0.524879		ENSGALG00000028318	CIP1	cdk_inhibitor_CIP1_(p21)	5hrs	UP
chrUn_random:22513982-22514607	1.7118	0.245781	1.75097	0.615875		-	-	-	5hrs	UP
chrUn_random:23160408-23161173	2.7118	0.101823	2.55833	0.505251		-	-	-	5hrs	UP
chrUn_random:28960322-28970774	2.57911	0.532655	1.782	0.414763		-	ZFP1	zinc_finger_protein_1_homolog_(mouse)	5hrs	UP
chrUn_random:30303475-30306505	1.53492	0.215563	1.70462	0.512654		ENSGALG00000013419	PBX4	pre-B-cell_leukemia_homeobox_4	5hrs	UP
chrUn_random:30306893-30313373	2.67433	0.0735896	3.25716	0.364828		ENSGALG00000013419	PBX4	pre-B-cell_leukemia_homeobox_4	5hrs	UP
chrUn_random:36053065-36054366	3.18129	0.0981235	2.61973	0.35582		-	-	-	5hrs	UP
chrUn_random:36368402-36370537	2.60231	0.117452	2.35669	0.325005		-	17.5	17.5	5hrs	UP
chrUn_random:36372981-36374543	2.33329	0.168457	3.73521	0.347946		-	-	-	5hrs	UP
chrUn_random:39948887-39953661	2.33329	0.168457	2.94166	0.599898		-	-	-	5hrs	UP
chrUn_random:41557441-41557622	1.59632	0.283145	1.61973	0.779558		-	MBD2	methyl-CpG_binding_domain_protein_2	5hrs	UP
chrUn_random:51622966-51624232	2.67433	0.0735896	2.69773	0.549338		-	LACTB2	lactamase,_beta_2	5hrs	UP
chrUn_random:1219071-1219516	1.59632	0.318934	2.35669	0.652462		-	-	-	5hrs	UP
chrUn_random:1706813-1707070	2.33329	0.12611	2.35669	0.652462		-	-	-	5hrs	UP
chrUn_random:5772608-5773434	1.65522	0.178577	1.6722	0.578387		-	-	-	5hrs	UP
chrUn_random:6077902-6078130	1.51386	0.259138	1.53727	0.719053		-	-	-	5hrs	UP
chrUn_random:7558732-7559116	1.59632	0.283145	1.61973	0.779558		ENSGALG00000005298	ST6GALNAC6	ST6_(alpha-N-acetyl-neuraminyl-2,3-beta-galactosyl-1,3)-N-acetylgalactosaminide_alpha-2,6-sialyltransferase_6	5hrs	UP
chrUn_random:9932962-9933164	3.01136	0.12043	2.73521	0.65846		-	-	-	5hrs	UP
chrUn_random:12729136-12729261	1.59632	0.283145	1.61973	0.779558		-	-	-	5hrs	UP
chrUn_random:14707128-14707837	1.81871	0.213978	1.61973	0.734605		-	-	-	5hrs	UP
chrUn_random:15711165-15711468	1.51386	0.177111	1.53727	0.55423		-	-	-	5hrs	UP
chrUn_random:18844665-18845056	2.59632	0.119713	2.61973	0.689205		-	-	-	5hrs	UP
chrUn_random:20123108-20123364	2.01136	0.19668	1.61973	0.779558		-	-	-	5hrs	UP
chrUn_random:20362436-20363028	2.7118	0.101823	1.73521	0.751102		-	-	-	5hrs	UP
chrUn_random:25168341-25168683	2.59632	0.189774	2.53727	0.599231		-	-	-	5hrs	UP
chrUn_random:27474598-27474994	2.4264	0.109609	3.03477	0.439038		ENSGALG00000004335	LOC419204	Similar_to_junctophilin_type_2	5hrs	UP
chrUn_random:27524371-27525181	3.01136	0.0646906	3.03477	0.572119		ENSGALG00000004335	LOC419204	Similar_to_junctophilin_type_2	5hrs	UP
chrUn_random:28944074-28944375	3.33329	0.0809181	1.53727	0.719053		ENSGALG00000022534	-	-	5hrs	UP
chrUn_random:30764811-30765337	1.81871	0.213978	1.84212	0.723315		-	-	-	5hrs	UP
chrUn_random:33877637-33878760	2.59632	0.0837396	2.68684	0.285234		-	-	-	5hrs	UP
chrUn_random:35940862-35941091	2.47079	0.141559	3.20469	0.519586		-	-	-	5hrs	UP
chrUn_random:41543919-41544183	2.33329	0.168457	2.35669	0.753432		-	LOC430763	similar_to_ALR	5hrs	UP
chrUn_random:43881108-43881269	1.93736	0.15659	1.69773	0.671045		-	-	-	5hrs	UP
chrUn_random:49850377-49851027	3.18129	0.0981235	2.15024	0.521637		ENSGALG00000013406	C3orf64	chromosome_3_open_reading_frame_64	5hrs	UP
chrUn_random:53089466-53089953	3.33329	0.0809181	3.03477	0.572119		-	-	-	5hrs	UP
chrUn_random:54914964-54915396	2.7118	0.101823	3.4942	0.426373		-	-	-	5hrs	UP
chrUn_random:56045699-56045920	2.59632	0.119713	2.61973	0.689205		-	-	-	5hrs	UP
chrUn_random:59056951-59057501	2.81871	0.0870836	2.25716	0.680312		-	-	-	5hrs	UP
chrUn_random:59399869-59400579	2.01136	0.244223	1.90923	0.603481		-	-	-	5hrs	UP
chrZ:2007183-2009021	2.59632	0.119713	2.35669	0.652462		ENSGALG00000001732	EPG5	ectopic_P-granules_autophagy_protein_5_homolog_(C._elegans)	5hrs	UP
chrZ:23527821-23531654	3.33329	0.0809181	4.12223	0.474909		ENSGALG00000014945	ANKRD31	ankyrin_repeat_domain_31	5hrs	UP
chrZ:23535277-23537445	2.47079	0.141559	2.03477	0.669821		-	-	-	5hrs	UP
chrZ:23538171-23549335	2.59632	0.119713	2.35669	0.504792		-	-	-	5hrs	UP
chrZ:32741005-32832334	2.59632	0.119713	3.03477	0.572119		ENSGALG00000015096	SH3GL2	SH3-domain_GRB2-like_2	5hrs	UP
chrZ:45085551-45102148	3.47079	0.067429	4.03477	0.502128		-	-	-	5hrs	UP
chrZ:66823622-66829837	3.33329	0.0809181	2.61973	0.573866		-	-	-	5hrs	UP
chrZ:8565389-8565940	1.68943	0.146469	1.61973	0.427388		-	-	-	5hrs	UP
chrZ:8567146-8575026	1.77689	0.125406	1.82995	0.340745		-	-	-	5hrs	UP
chrZ:10855225-10859525	1.74833	0.27011	1.61973	0.734605		ENSGALG00000003629	LOC427440	similar_to_hypothetical_protein_FLJ13231	5hrs	UP
chrZ:16229805-16238041	2.18129	0.201979	1.61973	0.734605		ENSGALG00000014712	SLC38A9	solute_carrier_family_38,_member_9	5hrs	UP
chrZ:66565234-66645562	3.81871	0.159025	4.20469	0.448964		-	-	-	5hrs	UP
chrZ:68790783-68791448	2.33329	0.099104	2.73521	0.445413		-	-	-	5hrs	UP
chrZ:1826954-1827569	2.01136	0.139473	2.03477	0.611619		-	-	-	5hrs	UP
chrZ:2039002-2039668	1.81871	0.213978	1.84212	0.723315		-	-	-	5hrs	UP
chrZ:6800210-6800417	1.81871	0.213978	1.84212	0.723315		ENSGALG00000014168	NOL6	nucleolar_protein_6_(RNA-associated)	5hrs	UP
chrZ:17605371-17605999	3.59632	0.0566788	3.61973	0.624138		-	-	-	5hrs	UP
chrZ:18578045-18578665	2.7118	0.101823	2.73521	0.65846		ENSGALG00000000250	LOC425720	similar_to_KIAA1577_protein	5hrs	UP
chrZ:23537549-23538098	2.33329	0.168457	2.35669	0.753432		-	-	-	5hrs	UP
chrZ:23551603-23552232	2.59632	0.119713	2.61973	0.689205		-	-	-	5hrs	UP
chrZ:23745643-23752264	3.33329	0.48103	3.35669	0.692965		-	-	-	5hrs	UP
chrZ:39272785-39273613	3.01136	0.0646906	3.03477	0.572119		-	-	-	5hrs	UP
chrZ:41712525-41712946	1.74833	0.27011	1.77173	0.799433		-	-	-	5hrs	UP
chrZ:41713004-41713722	2.09882	0.143729	2.12223	0.644139		-	-	-	5hrs	UP
chrZ:42721223-42722779	2.06199	0.0502132	2.08539	0.296297		-	-	-	5hrs	UP
chrZ:45182877-45183564	2.01136	0.19668	2.03477	0.738391		-	-	-	5hrs	UP
chrZ:53599609-53600149	2.7118	0.101823	1.73521	0.751102		-	-	-	5hrs	UP
chrZ:64401803-64402160	2.7118	0.101823	2.73521	0.65846		-	-	-	5hrs	UP
chrZ:64497177-64497673	1.88583	0.22997	1.90923	0.768561		-	-	-	5hrs	UP
chrZ:66565234-66645562	2.33329	0.184975	2.35669	0.652462		-	-	-	5hrs	UP
chrZ:70783081-70783498	2.47079	0.141559	2.4942	0.720879		-	-	-	5hrs	UP
chrZ:72266917-72267337	2.01136	0.139473	1.77173	0.64793		-	-	-	5hrs	UP
chrZ:73069539-73070012	2.33329	0.168457	2.35669	0.753432		ENSGALG00000005016	ZNF608	zinc_finger_protein_608	5hrs	UP
chr1:8121517-8126596	-3.81307	0.00169152	-3.80654	0.046806		ENSGALG00000006606	KIAA1324L	KIAA1324-like	5hrs	DOWN
chr1:11908400-12047565	-5.23229	0.0163023	-6.21316	0.0150714		ENSGALG00000008455	SEMA3C	sema_domain,_immunoglobulin_domain_(Ig),_short_basic_domain,_secreted,_(semaphorin)_3C	5hrs	DOWN
chr1:15498741-15523836	-3.46437	0.00245318	-3.67573	0.0106433		ENSGALG00000008060	PRKAR2B	protein_kinase,_cAMP-dependent,_regulatory,_type_II,_beta	5hrs	DOWN
chr1:15786230-15797333	-7.41443	0.0012364	-6.66567	0.00274344		ENSGALG00000007998	SLC26A4	solute_carrier_family_26,_member_4	5hrs	DOWN
chr1:24998229-25027819	-2.66476	0.0022596	-2.61373	1.94e-08			-	-	5hrs	DOWN
chr1:50204422-50220358	-4.02817	0.000231023	-4.00963	0.00371795		-	EMP1	Epithelial_membrane_protein_1	5hrs	DOWN
chr1:52639188-52655264	-4.90214	0.00266657	-5.61868	0.000686175		ENSGALG00000012178	PDGFB	platelet-derived_growth_factor_beta_polypeptide_(simian_sarcoma_viral_(v-sis)_oncogene_homolog)	5hrs	DOWN
chr1:55308368-55323992	-3.23023	0.000227104	-3.43138	5.51e-05		-	BPIL2	bactericidal/permeability-increasing_protein-like_2	5hrs	DOWN
chr1:55978585-56026202	-2.05304	0.00412339	-1.9959	0.00431839		ENSGALG00000012662	NUAK1	NUAK_family,_SNF1-like_kinase,_1	5hrs	DOWN
chr1:57567370-57608497	-1.5885	0.0287072	-1.54942	0.000885003		ENSGALG00000012763	GNPTAB	N-acetylglucosamine-1-phosphate_transferase,_alpha_and_beta_subunits	5hrs	DOWN
chr1:61833292-61983763	-1.68141	0.0142294	-1.52797	0.00526403		ENSGALG00000012956	TMTC1	transmembrane_and_tetratricopeptide_repeat_containing_1	5hrs	DOWN
chr1:64422924-64609450	-2.2541	0.00676453	-2.22082	1.2e-06		ENSGALG00000013071	CALD1	caldesmon_1	5hrs	DOWN
chr1:81012990-81046413	-3.72177	0.000411112	-3.90763	8.63e-12		ENSGALG00000014746	TRPV6	Transient_receptor_potential_cation_channel,_subfamily_V,_member_6	5hrs	DOWN
chr1:107541529-107569959	-1.82032	0.00804567	-1.78179	0.00154279		ENSGALG00000015828	BACH1	BTB_and_CNC_homology_1,_basic_leucine_zipper_transcription_factor_1	5hrs	DOWN
chr1:111250666-111266904	-2.96242	0.000738892	-2.93783	1.16e-05		-	ETS2	v-ets_erythroblastosis_virus_E26_oncogene_homolog_2_(avian)	5hrs	DOWN
chr1:111479441-111504715	-2.00708	0.0375913	-1.99171	0.0473789		ENSGALG00000016127	SH3BGR	SH3_domain_binding_glutamic_acid-rich_protein	5hrs	DOWN
chr1:112893594-112932110	-2.12936	0.00631007	-2.23694	0.00650573		ENSGALG00000016185	SLC37A1	solute_carrier_family_37_(glycerol-3-phosphate_transporter),_member_1	5hrs	DOWN
chr1:178384445-178508353	-3.44807	0.00258663	-3.26069	0.0430201		ENSGALG00000017065	STARD13	StAR-related_lipid_transfer_(START)_domain_containing_13	5hrs	DOWN
chr1:180351959-180356720	-3.94375	0.000100201	-4.2531	7.34e-05		ENSGALG00000017094	CDX2	caudal_type_homeobox_2	5hrs	DOWN
chr1:183241169-183271649	-3.33258	0.00121783	-3.2732	8.26e-09		ENSGALG00000017136	GJB6	gap_junction_protein,_beta_6,_30kDa	5hrs	DOWN
chr1:186318634-186375647	-4.17277	0.00278871	-5.17469	0.00577635		ENSGALG00000017179	PDGFD	platelet_derived_growth_factor_D	5hrs	DOWN
chr1:192534964-192551503	-2.04336	0.00535281	-2.05544	5.07e-07		-	CTSC	cathepsin_C	5hrs	DOWN
chr1:198826698-198859005	-5.62225	1.25e-06	-6.34288	6.66e-22		ENSGALG00000000839	WNT11	wingless-type_MMTV_integration_site_family,_member_11	5hrs	DOWN
chr1:40109490-40117264	-2.65422	0.000323693	-2.65256	1.69e-05		ENSGALG00000010257	CSRP2	cysteine_and_glycine-rich_protein_2	5hrs	DOWN
chr1:52533242-52539549	-1.61912	0.0255045	-1.60019	0.0497096		ENSGALG00000012146	MGAT3	mannosyl_(beta-1,4-)-glycoprotein_beta-1,4-N-acetylglucosaminyltransferase	5hrs	DOWN
chr1:53021169-53039327	-2.14297	0.00352704	-2.21183	0.00167322		ENSGALG00000012265	MICALL1	MICAL-like_1	5hrs	DOWN
chr1:56627502-56666236	-1.70326	0.0121462	-1.6364	0.00276866		ENSGALG00000012714	TXNRD1	thioredoxin_reductase_1	5hrs	DOWN
chr1:64772596-64880200	-3.11863	0.000484867	-3.04955	0.000152142		ENSGALG00000013078	RERG	RAS-like,_estrogen-regulated,_growth_inhibitor	5hrs	DOWN
chr1:83570074-83592637	-1.65679	0.0382321	-1.65972	9.76e-06		-	ATP1A1	ATPase,_Na+/K+_transporting,_alpha_1_polypeptide	5hrs	DOWN
chr1:83970748-83980005	-2.67314	0.00136564	-2.68652	0.00865319		ENSGALG00000015075	LOC408180	similar_to_beta3-glucuronyltransferase	5hrs	DOWN
chr1:84109558-84113025	-2.13129	0.00378614	-2.03469	0.00207108		ENSGALG00000015079	UPK1B	uroplakin_1B	5hrs	DOWN
chr1:87015654-87119232	-2.7354	0.00313726	-2.67203	7.47e-10		ENSGALG00000015230	NME7	NME/NM23_family_member_7	5hrs	DOWN
chr1:109366757-109407038	-2.7634	0.00072154	-2.80978	4.04e-05		ENSGALG00000016014	RCAN1	regulator_of_calcineurin_1	5hrs	DOWN
chr1:112367797-112410717	-1.57889	0.0407019	-1.52333	0.00862062		ENSGALG00000016142	MX1	myxovirus_(influenza_virus)_resistance_1,_interferon-inducible_protein_p78_(mouse)	5hrs	DOWN
chr1:113342606-113355363	-2.46833	0.00234884	-2.48524	0.00636663		ENSGALG00000016200	SIK1	salt-inducible_kinase_1	5hrs	DOWN
chr1:116718556-116752815	-1.926	0.0365423	-2.10274	4.63e-05		ENSGALG00000016261	NOX2	cytochrome_b-245,_beta_polypeptide	5hrs	DOWN
chr1:126836554-126861017	-4.42219	0.00496859	-4.7067	0.0103785		ENSGALG00000016592	PRPS2	phosphoribosyl_pyrophosphate_synthetase_2	5hrs	DOWN
chr1:134185340-134203509	-2.76146	0.00158756	-2.78877	1.32e-05		ENSGALG00000016721	PLCXD1	phosphatidylinositol-specific_phospholipase_C,_X_domain_containing_1	5hrs	DOWN
chr1:139703469-139758566	-1.93817	0.00962683	-2.09524	0.00352956		ENSGALG00000016801	UXS1	UDP-glucuronate_decarboxylase_1	5hrs	DOWN
chr1:149545242-149617725	-3.09537	0.000767646	-3.41869	0.00181901		ENSGALG00000016890	MBNL2	Muscleblind-like_2_(Drosophila)	5hrs	DOWN
chr1:158951085-159023773	-3.5736	3.22e-05	-3.73782	1.25e-05		ENSGALG00000016920	LMO7	LIM_domain_7	5hrs	DOWN
chr1:199684189-199697155	-1.81275	0.0199993	-1.85041	0.00330488		ENSGALG00000014170	MOGAT2	Monoacylglycerol_O-acyltransferase_2	5hrs	DOWN
chr1:84107800-84108895	-1.83811	0.00759189	-1.81727	0.00234039		ENSGALG00000015079	UPK1B	uroplakin_1B	5hrs	DOWN
chr1:120940391-120941866	-1.86616	0.0245041	-1.72353	0.0380895		ENSGALG00000022791	LOC418592	hypothetical_LOC418592	5hrs	DOWN
chr1:120941982-120944518	-2.24644	0.00216936	-2.05519	0.00240401		ENSGALG00000022791	LOC418592	hypothetical_LOC418592	5hrs	DOWN
chr1:178509742-178511684	-6.03303	0.000635459	-5.9876	0.0293821			-	-	5hrs	DOWN
chr10:7324627-7559671	-2.46372	0.00206659	-2.47159	0.00297397		ENSGALG00000004087	THSD4	thrombospondin,_type_I,_domain_containing_4	5hrs	DOWN
chr10:12458979-12512289	-2.5543	0.00181613	-2.63397	4.14e-10		ENSGALG00000023451	TRPM7/gga-mir-6596	transient_receptor_potential_cation_channel,_subfamily_M,_member_7	5hrs	DOWN
chr10:20839348-20868401	-3.7779	0.00367829	-4.1511	0.0299767		ENSGALG00000007865	SMAD6	SMAD_family_member_6	5hrs	DOWN
chr10:251391-282856	-5.07256	5.14e-07	-5.18366	2.35e-08		ENSGALG00000002480/ENSGALG00000002522	ALPK3/SLC28A2	alpha-kinase_3/Uncharacterized_protein	5hrs	DOWN
chr10:7559726-7564972	-2.19767	0.00267194	-2.19095	0.00413748		-	-	-	5hrs	DOWN
chr12:199695-204190	-1.59068	0.021991	-1.60841	0.0165778		ENSGALG00000001447	LOC415891	Hypothetical_LOC415891	5hrs	DOWN
chr12:9445135-9463923	-3.83279	7.82e-07	-3.86027	3.44e-12		ENSGALG00000005909	GATA2	GATA_binding_protein_2	5hrs	DOWN
chr14:9411595-9433424	-2.44807	0.00625195	-2.63766	0.0381899		ENSGALG00000007261	EMP2	epithelial_membrane_protein_2	5hrs	DOWN
chr15:10311442-10332315	-1.84741	0.00925711	-1.80322	0.00208046		ENSGALG00000007720	AIFM3	apoptosis-inducing_factor,_mitochondrion-associated,_3	5hrs	DOWN
chr15:12519391-12528872	-6.17583	0.0104198	-6.84788	0.00117283		-	TBX3	T-box_3	5hrs	DOWN
chr15:236323-307597	-2.71593	0.00442729	-2.72605	0.000363605		-	-	-	5hrs	DOWN
chr15:3444880-3448440	-2.57059	0.031652	-2.5647	0.0208538		-	-	-	5hrs	DOWN
chr15:8047864-8055747	-3.09906	0.00372052	-3.32598	0.035579		ENSGALG00000005808	KREMEN1	kringle_containing_transmembrane_protein_1	5hrs	DOWN
chr15:8733438-8743797	-3.89553	0.00129892	-3.90383	0.0358718		ENSGALG00000006642	ADORA2A	adenosine_A2a_receptor	5hrs	DOWN
chr15:9024399-9050855	-3.39444	3.17e-06	-3.42135	2.69e-15		-	SLC5A1	solute_carrier_family_5_(sodium/glucose_cotransporter),_member_1	5hrs	DOWN
chr15:9310471-9341763	-3.17032	0.000942845	-3.31325	3.96e-09		ENSGALG00000006838	LOC416959	similar_to_iron_binding_protein	5hrs	DOWN
chr15:231486-234747	-2.47335	0.00108879	-2.45709	0.00227409		-	-	-	5hrs	DOWN
chr15:8729427-8732337	-3.56153	0.000956978	-3.53812	0.0241494		-	-	-	5hrs	DOWN
chr17:2338697-2346147	-1.62589	0.0174732	-1.61576	0.00188757		ENSGALG00000008518	LOC417253	similar_to_glutamine_synthetase	5hrs	DOWN
chr17:2816501-2819365	-2.68052	0.00216753	-2.7945	0.0139207		-	FAM129B	Family_with_sequence_similarity_129,_member_B	5hrs	DOWN
chr18:7624731-7647252	-2.75639	0.00187829	-2.82099	0.000260491		ENSGALG00000004021	AXIN2	axin_2	5hrs	DOWN
chr18:9301922-9323230	-1.95887	0.0176857	-2.10064	0.00662655		ENSGALG00000006915	BAIAP2	BAI1-associated_protein_2	5hrs	DOWN
chr19:5021675-5036479	-2.18137	0.00257822	-2.13516	6.52e-05		ENSGALG00000002629	TMEM248	transmembrane_protein_248	5hrs	DOWN
chr19:5275509-5303711	-2.53195	0.000660223	-2.57073	0.00031313		ENSGALG00000002783	SLC43A2	solute_carrier_family_43,_member_2	5hrs	DOWN
chr2:37509075-37832442	-2.79923	0.0299844	-2.71601	0.0236191		ENSGALG00000011298	RARB	retinoic_acid_receptor,_beta	5hrs	DOWN
chr2:64421502-64456910	-2.13339	0.0078822	-2.13221	0.000682881		-	LOC428479	similar_to_MGC82474_protein	5hrs	DOWN
chr2:94978727-94985036	-2.54958	0.00388469	-2.64506	9.67e-05		-	CBLN2	cerebellin_2	5hrs	DOWN
chr2:105450047-105562174	-2.34417	0.0143158	-2.38432	0.00147984		ENSGALG00000014935	GREB1L	growth_regulation_by_estrogen_in_breast_cancer-like	5hrs	DOWN
chr2:109262046-109278967	-1.88927	0.0261026	-1.93569	0.00384584		ENSGALG00000015142	DSG2	desmoglein_2	5hrs	DOWN
chr2:111813615-111819959	-1.68408	0.0300934	-1.75542	0.00113161		ENSGALG00000024487	C8orf22	chromosome_8_open_reading_frame_22	5hrs	DOWN
chr2:145391291-145395130	-1.65982	0.0420322	-1.86082	0.0139222		ENSGALG00000016308	MYC	v-myc_myelocytomatosis_viral_oncogene_homolog_(avian)	5hrs	DOWN
chr2:147604428-147640660	-4.51059	0.000184001	-4.98154	1.73e-06		ENSGALG00000016220	WISP1	WNT1_inducible_signaling_pathway_protein_1	5hrs	DOWN
chr2:3156611-3197920	-3.82676	0.000815512	-3.94251	0.000436836		ENSGALG00000005430	ALS2CL	ALS2_C-terminal_like	5hrs	DOWN
chr2:14816219-14831286	-3.76123	1.55e-05	-3.67419	0.000127483		-	-	-	5hrs	DOWN
chr2:15231991-15236102	-2.15125	0.036857	-2.12541	0.017261		ENSGALG00000007359	BAMBI	BMP_and_activin_membrane-bound_inhibitor_homolog_(Xenopus_laevis)	5hrs	DOWN
chr2:21647030-21656754	-2.74808	0.0227968	-2.6523	0.0327997		ENSGALG00000009026	LOC420542	hypothetical_LOC420542	5hrs	DOWN
chr2:24415561-24417819	-3.98864	0.000399211	-4.13516	0.0057115		ENSGALG00000009129	DLX5	distal-less_homeobox_5	5hrs	DOWN
chr2:43175395-43185867	-2.01747	0.00385954	-2.01586	0.000413897		ENSGALG00000011888	TGM4	transglutaminase_4_(prostate)	5hrs	DOWN
chr2:57403238-57478304	-2.17534	0.0300751	-2.04052	0.0127656		ENSGALG00000012652	KCNG2	potassium_voltage-gated_channel,_subfamily_G,_member_2	5hrs	DOWN
chr2:64400642-64404161	-1.9173	0.0154583	-1.98599	0.0274991		ENSGALG00000012771	LOC420860	hypothetical_LOC420860	5hrs	DOWN
chr2:65833918-65954776	-3.68908	0.00014217	-3.65256	0.00178332		-	RREB1	ras_responsive_element_binding_protein_1	5hrs	DOWN
chr2:107624308-107712376	-3.76364	0.001516	-3.88084	0.00441474		-	-	-	5hrs	DOWN
chr2:109106568-109130583	-3.77102	4.26e-06	-3.71765	2.49e-08		-	-	-	5hrs	DOWN
chr2:109577874-109681011	-2.75027	0.000196385	-2.7633	8.07e-05		-	-	-	5hrs	DOWN
chr2:142055956-142136247	-1.87408	0.0123444	-1.84421	3.26e-06		ENSGALG00000016428	ENPP2	ectonucleotide_pyrophosphatase/phosphodiesterase_2_(autotaxin)	5hrs	DOWN
chr2:142564784-142692122	-2.36805	0.0160801	-2.33794	0.00591007		ENSGALG00000016399	SNTB1	syntrophin,_beta_1_(dystrophin-associated_protein_A1,_59kDa,_basic_component_1)	5hrs	DOWN
chr2:142976526-142996607	-2.61989	0.00277154	-2.61032	3.4e-06		-	-	-	5hrs	DOWN
chr2:147650219-147691010	-2.73573	9.85e-05	-2.74585	1.68e-08		-	NDRG1	N-myc_downstream_regulated_gene_1	5hrs	DOWN
chr2:147764958-147838393	-2.08201	0.00538611	-2.12145	0.00591236		-	-	-	5hrs	DOWN
chr2:2356796-2359082	-4.00656	0.00150451	-3.98316	0.0476597		-	-	-	5hrs	DOWN
chr2:33737612-33740468	-3.55632	0.000327325	-3.53292	0.00760923		-	LOC776169	similar_to_Proline_rich_15	5hrs	DOWN
chr20:11642793-11686337	-2.12473	0.00213841	-2.11567	3.89e-05		ENSGALG00000007668	BMP7	bone_morphogenetic_protein_7	5hrs	DOWN
chr20:7943488-7959690	-2.88311	0.00060461	-2.90204	0.000104625		ENSGALG00000005348	C20orf151	chromosome_20_open_reading_frame_151	5hrs	DOWN
chr21:6659187-6667015	-1.52829	0.030095	-1.5189	0.000458751		ENSGALG00000004889	SLC2A1	solute_carrier_family_2_(facilitated_glucose_transporter),_member_1	5hrs	DOWN
chr23:165632-175564	-1.64177	0.0210053	-1.61369	0.0178403		-	AIM1L	absent_in_melanoma_1-like	5hrs	DOWN
chr23:5978640-6000916	-5.80766	1.77e-08	-5.84941	1.19e-14		ENSGALG00000004249	GRHL3	grainyhead-like_3_(Drosophila)	5hrs	DOWN
chr25:1979329-1985977	-1.89863	0.0150478	-1.90831	0.0232311		ENSGALG00000000920	CGN	cingulin	5hrs	DOWN
chr26:2961382-2962268	-4.0761	0.00218484	-4.23202	0.045516		-	-	-	5hrs	DOWN
chr26:804731-841136	-1.59122	0.0204036	-1.53193	0.00863987		-	-	-	5hrs	DOWN
chr26:2129037-2149928	-6.04307	2.01e-07	-6.46508	1.46e-13		ENSGALG00000000745	SLC26A9	solute_carrier_family_26,_member_9	5hrs	DOWN
chr26:2933000-2942028	-2.89937	0.000927207	-2.90167	0.00774432		ENSGALG00000001319	CAMK1G	calcium/calmodulin-dependent_protein_kinase_IG	5hrs	DOWN
chr26:2942589-2953906	-5.77	0.00114928	-6.40818	0.00771813		ENSGALG00000001343	LAMB3	laminin,_beta_3	5hrs	DOWN
chr28:610885-612458	-1.68025	0.0179824	-1.70846	0.0112329		ENSGALG00000000458	TMPRSS9	transmembrane_protease,_serine_9	5hrs	DOWN
chr3:27794800-27828641	-3.18175	0.000160477	-3.21014	3.08e-11		ENSGALG00000010005	EPAS1	endothelial_PAS_domain_protein_1	5hrs	DOWN
chr3:33325643-33390315	-2.62996	0.00104668	-2.54593	5.72e-07		ENSGALG00000010580	STRN	striatin,_calmodulin_binding_protein	5hrs	DOWN
chr3:40910834-41011239	-2.33113	0.0416777	-2.5502	0.0499168		ENSGALG00000011025	SIPA1L2	signal-induced_proliferation-associated_1_like_2	5hrs	DOWN
chr3:41011303-41076055	-2.45496	0.00309302	-2.47272	0.00776517		ENSGALG00000011025	SIPA1L2	signal-induced_proliferation-associated_1_like_2	5hrs	DOWN
chr3:43871982-43908399	-2.72444	0.000561592	-2.69644	2.29e-08		ENSGALG00000011296	FRMD1	FERM_domain_containing_1	5hrs	DOWN
chr3:56436093-56446386	-3.47963	2.31e-05	-3.36517	3.54e-05		-	PERP	PERP,_TP53_apoptosis_effector	5hrs	DOWN
chr3:56453930-56471346	-2.55424	0.00387664	-2.75601	0.0228815		ENSGALG00000013857	PERP	PERP,_TP53_apoptosis_effector	5hrs	DOWN
chr3:69193240-69199213	-3.59068	0.00229519	-3.53509	0.0457292		ENSGALG00000015057	DDO	D-aspartate_oxidase	5hrs	DOWN
chr3:83490294-83508861	-2.3658	0.0144611	-2.28059	0.0276492		ENSGALG00000015903	FILIP1	filamin_A_interacting_protein_1	5hrs	DOWN
chr3:85126763-85129016	-4.64685	0.000412021	-4.60909	0.0147126		-	-	-	5hrs	DOWN
chr3:85586667-85653626	-2.37418	0.00795726	-2.96933	0.000858589		ENSGALG00000015970	COL9A1	collagen,_type_IX,_alpha_1	5hrs	DOWN
chr3:98724871-98726793	-2.07196	0.0028453	-2.05895	0.00166832		-	ID2	inhibitor_of_DNA_binding_2,_dominant_negative_helix-loop-helix_protein	5hrs	DOWN
chr3:99332524-99363434	-1.87765	0.0227715	-2.11819	0.0118357		ENSGALG00000016439	GRHL1	grainyhead-like_1_(Drosophila)	5hrs	DOWN
chr3:13688759-13770074	-3.29701	5.75e-05	-3.41941	9.59e-06		ENSGALG00000009037	SPTLC3	serine_palmitoyltransferase,_long_chain_base_subunit_3	5hrs	DOWN
chr3:16009837-16013577	-2.72119	0.0149914	-2.71731	0.00679491		-	-	-	5hrs	DOWN
chr3:42485136-42490910	-2.11752	0.00223311	-2.09465	5.24e-05		-	-	-	5hrs	DOWN
chr3:69933573-70018260	-2.75417	0.00288575	-2.66567	0.0433855		-	-	-	5hrs	DOWN
chr3:109012243-109058149	-2.70279	0.000145257	-2.76561	2.86e-06		-	-	-	5hrs	DOWN
chr3:109058928-109087833	-2.06393	0.0054275	-2.15971	0.00175678		ENSGALG00000016639	KIF13B	kinesin_family_member_13B	5hrs	DOWN
chr4:4359562-4368744	-2.97328	0.00126674	-3.07292	1.56e-06		-	VGLL1	vestigial_like_1_(Drosophila)	5hrs	DOWN
chr4:8727066-8738932	-2.81802	8.11e-05	-2.74222	6.1e-07		-	POF1B	premature_ovarian_failure,_1B	5hrs	DOWN
chr4:12198897-12208078	-4.71311	0.00360192	-5.67948	0.00495112		ENSGALG00000007657	CDX4	caudal_type_homeobox_4	5hrs	DOWN
chr4:31624789-31722049	-2.40568	0.00242074	-2.36606	0.000132358		ENSGALG00000009898	GAB1	GRB2-associated_binding_protein_1	5hrs	DOWN
chr4:54409441-54450531	-1.54633	0.0254357	-1.53692	0.0203149		ENSGALG00000011831	ANKRD50	ankyrin_repeat_domain_50	5hrs	DOWN
chr4:59769826-59887046	-1.59855	0.0211605	-1.56434	0.0136796		ENSGALG00000012211	PDLIM5	PDZ_and_LIM_domain_5	5hrs	DOWN
chr4:66448985-66454239	-2.81176	0.00650281	-3.26069	0.0430201		ENSGALG00000013715	DLC1	deleted_in_liver_cancer_1	5hrs	DOWN
chr4:70771845-70846455	-3.29982	0.00251409	-3.4692	0.000288593		ENSGALG00000014267	RBM47	RNA_binding_motif_protein_47	5hrs	DOWN
chr4:71914026-71946182	-2.53001	0.0035046	-2.56614	0.0271112		ENSGALG00000014336	RELL1	RELT-like_1	5hrs	DOWN
chr4:76629532-76695702	-3.76123	0.000633883	-3.99766	0.00250345		ENSGALG00000014398	PPARGC1A	peroxisome_proliferator-activated_receptor_gamma,_coactivator_1_alpha	5hrs	DOWN
chr4:81774810-81777300	-3.69379	4.18e-06	-3.64556	8.58e-07		ENSGALG00000015013	MSX1	msh_homeobox_1	5hrs	DOWN
chr4:11311075-11357967	-3.10954	0.000425094	-3.17525	2.75e-08		-	-	-	5hrs	DOWN
chr4:35165400-35198859	-2.36444	0.0309436	-3.13516	0.0329133		ENSGALG00000010119	CDKL2	cyclin-dependent_kinase-like_2_(CDC2-related_kinase)	5hrs	DOWN
chr4:35218670-35232136	-2.52469	0.00434745	-2.69416	0.022944		-	CSGALNACT1	Chondroitin_sulfate_N-acetylgalactosaminyltransferase_1	5hrs	DOWN
chr4:51228740-51245134	-1.81646	0.0209726	-1.94057	0.0466286		-	SHROOM3	shroom_family_member_3	5hrs	DOWN
chr4:70846518-70867640	-3.28237	9.38e-05	-3.21546	0.000775345		-	-	-	5hrs	DOWN
chr4:86011856-86038829	-4.5585	0.000509417	-4.59459	0.015462		-	NAT8L	N-acetyltransferase_8-like	5hrs	DOWN
chr4:86423220-86477237	-2.87988	0.000801719	-2.92752	1.97e-08		ENSGALG00000022957	FGFR3	Fibroblast_growth_factor_receptor_3	5hrs	DOWN
chr4:86007492-86011752	-4.31856	7.17e-05	-4.28716	0.00154933		-	-	-	5hrs	DOWN
chr5:18299594-18321727	-1.73407	0.0151328	-1.84505	0.00677051		ENSGALG00000007550	TPCN2	two_pore_segment_channel_2	5hrs	DOWN
chr5:40706976-40737705	-2.36097	0.00368376	-2.62516	0.00379919		ENSGALG00000010326	FLVCR2	feline_leukemia_virus_subgroup_C_cellular_receptor_family,_member_2	5hrs	DOWN
chr5:8974429-9007565	-2.75114	0.00671713	-3.03764	0.0261338		ENSGALG00000005540	MICAL2	microtubule_associated_monoxygenase,_calponin_and_LIM_domain_containing_2	5hrs	DOWN
chr5:9939444-9941479	-2.8848	0.0111205	-3.41149	0.0358198		-	ADM	adrenomedullin	5hrs	DOWN
chr5:16995357-17001593	-2.44354	0.0215329	-2.58262	0.00765287		-	RASSF7	Ras_association_(RalGDS/AF-6)_domain_family_7	5hrs	DOWN
chr5:25805246-25848835	-1.86516	0.0377154	-2.05598	0.000799275		ENSGALG00000008380	DGKZ	diacylglycerol_kinase,_zeta_104kDa	5hrs	DOWN
chr5:31927623-31943257	-2.50755	0.000331303	-2.54213	8.03e-07		ENSGALG00000009626	THBS1	thrombospondin_1	5hrs	DOWN
chr5:42977041-42994457	-1.80533	0.00855098	-1.79024	0.00146574		ENSGALG00000010520	DIO2	deiodinase,_iodothyronine,_type_II	5hrs	DOWN
chr5:43376456-43407406	-1.58611	0.0224258	-1.54816	0.000651282		-	SEL1L	sel-1_suppressor_of_lin-12-like_(C._elegans)	5hrs	DOWN
chr5:47358749-47492853	-2.42639	0.0021298	-2.40506	2.14e-06		ENSGALG00000010827	ITPK1	inositol_1,3,4-triphosphate_5/6_kinase	5hrs	DOWN
chr5:54640399-54658180	-2.79599	0.000669145	-3.21715	0.000348775		ENSGALG00000011696	JAG2	jagged_2	5hrs	DOWN
chr5:54658732-54678796	-2.98864	0.0131987	-3.69704	0.0417715		ENSGALG00000011696	JAG2	jagged_2	5hrs	DOWN
chr5:3518110-3521939	-4.1994	1.15e-08	-4.18838	4.62e-19		ENSGALG00000023903	-	-	5hrs	DOWN
chr6:12842666-12873463	-1.93575	0.0128641	-2.02274	0.00143024		ENSGALG00000004569	UNC5B	unc-5_homolog_B_(C._elegans)	5hrs	DOWN
chr6:19365404-19401301	-3.97749	6.15e-06	-4.27839	2.72e-08		-	-	-	5hrs	DOWN
chr6:22829186-22831314	-2.21854	0.00145781	-2.16882	0.000243164		-	-	-	5hrs	DOWN
chr7:21522857-21596430	-2.24296	0.0025267	-2.34488	0.00127607		ENSGALG00000011068	COBLL1	COBL-like_1	5hrs	DOWN
chr7:31877360-31939952	-2.17025	0.00871769	-2.18579	0.0210644		ENSGALG00000012187	MGAT5	mannosyl_(alpha-1,6-)-glycoprotein_beta-1,6-N-acetyl-glucosaminyltransferase	5hrs	DOWN
chr7:36470141-36501956	-2.68449	0.003663	-2.77259	0.0273475		-	LYPD6B	LY6/PLAUR_domain_containing_6B	5hrs	DOWN
chr7:5015526-5017479	-3.27688	0.00126866	-3.24207	0.0289006		ENSGALG00000021031	CXCR7	chemokine_(C-X-C_motif)_receptor_7	5hrs	DOWN
chr7:15247794-15278885	-2.39957	0.00323138	-2.41749	0.00784291		-	SSFA2	Sperm_specific_antigen_2	5hrs	DOWN
chr7:27610288-27640092	-4.80626	0.00010374	-5.15506	9.58e-05		-	-	-	5hrs	DOWN
chr7:29882181-29910019	-1.70912	0.0209749	-1.71497	0.0170916		-	-	-	5hrs	DOWN
chr7:29967076-29970512	-2.95226	0.000427577	-2.90241	0.00131757		-	-	-	5hrs	DOWN
chr7:14675023-14682512	-1.89318	0.0111849	-1.85698	0.029608		-	RAPH1	Ras_association_(RalGDS/AF-6)_and_pleckstrin_homology_domains_1	5hrs	DOWN
chr7:25012984-25018198	-3.73587	2.95e-05	-3.71758	0.000369293		-	-	-	5hrs	DOWN
chr7:31940013-31942786	-2.48263	0.00380648	-2.39986	0.0404668		-	-	-	5hrs	DOWN
chr8:20388514-20398577	-1.75786	0.010611	-1.75818	0.00044299		ENSGALG00000009988	ELOVL1	elongation_of_very_long_chain_fatty_acids_(FEN1/Elo2,_SUR4/Elo3,_yeast)-like_1	5hrs	DOWN
chr9:6144951-6158242	-3.22217	0.0030608	-3.00232	0.00984692		ENSGALG00000005772	BOK	BCL2-related_ovarian_killer	5hrs	DOWN
chr9:14184120-14218104	-2.20555	0.00715386	-2.1336	0.00402103		ENSGALG00000020827	ATP13A4	ATPase_type_13A4	5hrs	DOWN
chr9:25474287-25491926	-3.00532	0.000209413	-3.47805	2.54e-05		-	CP	ceruloplasmin_(ferroxidase)	5hrs	DOWN
chr9:24244921-24259402	-2.19611	0.0059845	-2.16744	0.000132871		-	-	-	5hrs	DOWN
chr9:24773105-24814992	-3.72199	9.69e-06	-4.14744	1.7e-06		-	-	-	5hrs	DOWN
chrUn_random:28799250-28849611	-2.47009	0.02442	-2.45739	0.000374071		-	CELSR1	cadherin,_EGF_LAG_seven-pass_G-type_receptor_1_(flamingo_homolog,_Drosophila)	5hrs	DOWN
chrUn_random:7657805-7658974	-1.97554	0.00794029	-1.91779	0.0216435		-	CLDN3	claudin_3	5hrs	DOWN
chrZ:239538-252375	-2.20323	0.00565948	-2.21099	0.00973822		ENSGALG00000003253	ATP8B1	ATPase,_class_I,_type_8B,_member_1	5hrs	DOWN
chrZ:7805780-7829580	-3.22568	0.00691987	-3.50129	0.0271973		ENSGALG00000005848	IL11RA	interleukin_11_receptor,_alpha	5hrs	DOWN
chrZ:10526683-10594767	-3.05013	0.000869721	-3.02032	8.09e-10		ENSGALG00000003582	SLC1A3	solute_carrier_family_1_(glial_high_affinity_glutamate_transporter),_member_3	5hrs	DOWN
chrZ:27352765-27367737	-3.41576	6.55e-05	-3.47338	1.3e-05		ENSGALG00000010166	VLDLR	very_low_density_lipoprotein_receptor	5hrs	DOWN
chrZ:36922974-36937145	-2.03391	0.00730041	-1.95866	0.00865672		-	-	-	5hrs	DOWN
chrZ:41818459-41845318	-2.71019	0.00492828	-2.40581	0.00236292		-	LOC770548	uncharacterized_LOC770548	5hrs	DOWN
chrZ:58148543-58161454	-2.20149	0.00681595	-2.18623	0.00921954		ENSGALG00000014658	ARRDC3	arrestin_domain_containing_3	5hrs	DOWN
chrZ:55646441-55673977	-2.50155	0.00113695	-2.49232	0.000702099		ENSGALG00000014686	FBN2	fibrillin_2	5hrs	DOWN
chrZ:55706686-55752717	-3.02456	0.0105836	-2.83313	0.0327024		ENSGALG00000014686	FBN2	fibrillin_2	5hrs	DOWN
chr1:8067569-8099609	-2.87617	0.0280575	-2.9876	0.151244		ENSGALG00000006606	KIAA1324L	KIAA1324-like	5hrs	DOWN
chr1:8100728-8121416	-3.03303	0.0269459	-3.5975	0.112484		ENSGALG00000006606	KIAA1324L	KIAA1324-like	5hrs	DOWN
chr1:15390285-15418411	-2.46669	0.0445454	-2.57994	0.275163		ENSGALG00000008081	PIK3CG	phosphoinositide-3-kinase,_catalytic,_gamma_polypeptide	5hrs	DOWN
chr1:38288529-38291968	-4.38096	0.0163111	-4.5502	0.332276		ENSGALG00000010181	TMEM19	transmembrane_protein_19	5hrs	DOWN
chr1:49738015-49750954	-2.79599	0.0331375	-2.71247	0.270018		-	LOC417937	Hypothetical_LOC417937	5hrs	DOWN
chr1:49751674-49759322	-2.55892	0.0392253	-2.67219	0.0755612		-	LOC417937	Hypothetical_LOC417937	5hrs	DOWN
chr1:52691760-52698576	-3.68908	0.0491848	-3.13516	0.534471		ENSGALG00000012183	NPTXR	Neuronal_pentraxin_receptor	5hrs	DOWN
chr1:61635622-61650521	-3.04753	0.0375238	-2.8397	0.274007		ENSGALG00000012944	DENND5B	DENN/MADD_domain_containing_5B	5hrs	DOWN
chr1:79824735-79850330	-3.84662	0.0144056	-3.82322	0.312561		ENSGALG00000014407	CASR	calcium-sensing_receptor	5hrs	DOWN
chr1:79852586-79856134	-3.23657	0.0441775	-3.35755	0.463549		ENSGALG00000014407	CASR	calcium-sensing_receptor	5hrs	DOWN
chr1:112426616-112430599	-3.68908	0.0491848	-2.6282	0.564703		-	-	-	5hrs	DOWN
chr1:172060665-172069749	-3.2213	0.0129853	-3.35755	0.126264		ENSGALG00000016979	SLC25A30	solute_carrier_family_25,_member_30	5hrs	DOWN
chr1:176679514-176701367	-3.41489	0.0238603	-3.45709	0.203842		ENSGALG00000017050	SMAD9	SMAD_family_member_9	5hrs	DOWN
chr1:20465567-20467356	-1.79599	0.0392266	-1.8841	0.155656		-	LOC768655	similar_to_pim-3_protein	5hrs	DOWN
chr1:25032353-25041869	-3.77	0.00501984	-3.79812	0.117739		ENSGALG00000008987	WNT16	wingless-type_MMTV_integration_site_family,_member_16	5hrs	DOWN
chr1:47059441-47064382	-2.72561	0.0172314	-2.74951	0.188382		ENSGALG00000011320	TMCC3	transmembrane_and_coiled-coil_domain_family_3	5hrs	DOWN
chr1:49723313-49724497	-5.66107	0.00145437	-5.72012	0.0570751		-	LOC417937	Hypothetical_LOC417937	5hrs	DOWN
chr1:57540286-57549700	-3.52469	0.00604084	-3.73077	0.086082		-	DRAM1	DNA-damage_regulated_autophagy_modulator_1	5hrs	DOWN
chr1:69818533-69852303	-2.89651	0.0109528	-1.83517	0.194054		ENSGALG00000014071	ITPR2	inositol_1,4,5-triphosphate_receptor,_type_2	5hrs	DOWN
chr1:80289156-80290655	-4.31057	0.0183943	-4.66567	0.296702		ENSGALG00000014466	C12orf53	chromosome_12_open_reading_frame_53	5hrs	DOWN
chr1:83980057-83998115	-3.02426	0.0203909	-3.22827	0.206525		ENSGALG00000015075	LOC408180	similar_to_beta3-glucuronyltransferase	5hrs	DOWN
chr1:84115553-84120475	-2.23657	0.039491	-2.25942	0.132267		-	-	-	5hrs	DOWN
chr1:113097834-113099287	-2.91464	0.025864	-2.90383	0.253173		-	LOC418543	hypothetical_gene_supported_by_BX933825;_CR407341	5hrs	DOWN
chr1:120930432-120933197	-1.6516	0.040318	-1.58089	0.0654597		ENSGALG00000016539	LOC426510	hypothetical_gene_supported_by_CR406681	5hrs	DOWN
chr1:15523892-15525751	-2.037	0.0285132	-2.0136	0.197409		-	-	-	5hrs	DOWN
chr1:47056456-47058747	-3.33441	0.00698754	-3.28716	0.143148		-	-	-	5hrs	DOWN
chr1:47064523-47064986	-3.89553	0.036076	-3.77259	0.574112		ENSGALG00000011320	TMCC3	transmembrane_and_coiled-coil_domain_family_3	5hrs	DOWN
chr1:52705273-52706120	-2.84662	0.0389616	-2.50129	0.447913			ENSGALG00000023145	ENSGALG00000023145	5hrs	DOWN
chr1:57618240-57618763	-3.68908	0.0491848	-3.66567	0.604865		ENSGALG00000012766	SYCP3	synaptonemal_complex_protein_3	5hrs	DOWN
chr1:64771466-64772526	-3.0761	0.00501375	-3.0527	0.0898438			-	-	5hrs	DOWN
chr1:70505118-70506770	-2.34228	0.0439526	-2.31887	0.331955		-	-	-	5hrs	DOWN
chr1:79856197-79857560	-4.33441	0.00219044	-4.31101	0.0776077		ENSGALG00000014407	CASR	calcium-sensing_receptor	5hrs	DOWN
chr1:79857744-79858751	-4.5122	0.0129833	-4.4888	0.351497		-	-	-	5hrs	DOWN
chr1:80286441-80287960	-2.60755	0.0329174	-2.58414	0.313673		-	-	-	5hrs	DOWN
chr1:84260017-84260619	-4.0761	0.0271229	-4.0527	0.489308		ENSGALG00000015084	IGSF11	immunoglobulin_superfamily,_member_11	5hrs	DOWN
chr1:94919963-94921011	-3.98864	0.0311908	-2.35755	0.564764		-	CREG1	cellular_repressor_of_E1A-stimulated_genes_1	5hrs	DOWN
chr1:120913841-120914990	-2.08262	0.0197329	-2.00337	0.146474		-	-	-	5hrs	DOWN
chr1:124400658-124402443	-3.01418	0.0123468	-2.96523	0.191011			-	-	5hrs	DOWN
chr1:124402523-124403693	-5.15856	0.00399343	-5.09452	0.176485			-	-	5hrs	DOWN
chr1:124406456-124407015	-3.79599	0.0419843	-3.66567	0.604865		ENSGALG00000016543	NHS	Nance-Horan_syndrome_(congenital_cataracts_and_dental_anomalies)	5hrs	DOWN
chr1:124407469-124408171	-3.98864	0.0311908	-3.87213	0.544605		ENSGALG00000016543	NHS	Nance-Horan_syndrome_(congenital_cataracts_and_dental_anomalies)	5hrs	DOWN
chr1:134431976-134432547	-3.68908	0.0491848	-3.5502	0.636853		-	-	-	5hrs	DOWN
chr1:156395309-156397304	-2.31057	0.0471475	-1.79751	0.133003		-	-	-	5hrs	DOWN
chr1:159955069-159955764	-3.5736	0.0241781	-2.90383	0.475475			-	-	5hrs	DOWN
chr1:167054232-167054841	-3.89553	0.036076	-3.77259	0.574112		-	-	-	5hrs	DOWN
chr1:175624001-175624496	-3.79599	0.0419843	-3.66567	0.604865		-	-	-	5hrs	DOWN
chr1:175626322-175627026	-3.23657	0.0441775	-3.13516	0.534471		-	-	-	5hrs	DOWN
chr1:175736713-175737214	-3.23657	0.0441775	-3.13516	0.534471		ENSGALG00000017041	FREM2	FRAS1_related_extracellular_matrix_protein_2	5hrs	DOWN
chr1:186375898-186377017	-3.68908	0.0194752	-4.60909	0.314024			-	-	5hrs	DOWN
chr10:16127166-16150974	-1.92354	0.0249609	-1.89485	0.101185		-	-	-	5hrs	DOWN
chr10:11934624-11937349	-1.96953	0.0423807	-1.98018	0.188072		-	-	-	5hrs	DOWN
chr11:20314464-20341093	-2.35121	0.023066	-2.6877	0.0929958		ENSGALG00000006099	ZFPM1	zinc_finger_protein,_multitype_1	5hrs	DOWN
chr11:11692888-11693828	-3.5122	0.0270826	-2.90383	0.475475		ENSGALG00000004943	SS18L2	synovial_sarcoma_translocation_gene_on_chromosome_18-like_2	5hrs	DOWN
chr12:12082838-12088944	-4.0761	0.0271229	-3.91943	0.282492		ENSGALG00000007052	PXK	PX_domain_containing_serine/threonine_kinase	5hrs	DOWN
chr12:6923446-6935185	-2.00571	0.0333904	-1.96523	0.17463		ENSGALG00000005237	FGD3	FYVE,_RhoGEF_and_PH_domain_containing_3	5hrs	DOWN
chr12:10785866-10792648	-2.45813	0.0193067	-2.56515	0.108509		ENSGALG00000006235	SLC41A3	solute_carrier_family_41,_member_3	5hrs	DOWN
chr12:14060498-14063900	-3.26166	0.0249206	-3.60909	0.162559		-	-	-	5hrs	DOWN
chr12:14063958-14081403	-2.08056	0.0309412	-2.18025	0.0986151		-	-	-	5hrs	DOWN
chr12:15785251-15792899	-2.29349	0.0196057	-2.23113	0.140113		ENSGALG00000014627	FRMD4B	FERM_domain_containing_4B	5hrs	DOWN
chr13:9809285-9814057	-3.82788	0.0301274	-4.13516	0.218577		ENSGALG00000002947	MSX2	msh_homeobox_2	5hrs	DOWN
chr13:7511180-7511963	-3.31057	0.0388706	-3.28716	0.486265		-	-	-	5hrs	DOWN
chr13:9448199-9449397	-2.49114	0.0499723	-2.46773	0.402534		-	-	-	5hrs	DOWN
chr14:2259084-2265414	-2.76123	0.0284923	-2.7022	0.202585		ENSGALG00000021238	LOC416453	similar_to_FLJ20359_protein	5hrs	DOWN
chr14:1149715-1175814	-2.17084	0.0417769	-1.95013	0.198354		ENSGALG00000003548	BAIAP2L1	BAI1-associated_protein_2-like_1	5hrs	DOWN
chr14:2265576-2266238	-3.98864	0.0311908	-4.0527	0.489308		-	-	-	5hrs	DOWN
chr15:8743977-8754722	-4.94284	0.00598362	-5.0527	0.187095		-	-	-	5hrs	DOWN
chr15:234886-236249	-2.36946	0.00832145	-2.34606	0.0866992		-	-	-	5hrs	DOWN
chr15:481808-482849	-3.44807	0.0304398	-3.42467	0.441737		ENSGALG00000001496	-	-	5hrs	DOWN
chr15:482966-484551	-3.40368	0.0187956	-3.38027	0.3172		ENSGALG00000001496	-	-	5hrs	DOWN
chr15:484817-486704	-3.66107	0.00661709	-3.63766	0.155299		ENSGALG00000001496	-	-	5hrs	DOWN
chr15:487020-487880	-3.31057	0.0388706	-3.28716	0.486265		ENSGALG00000001496	-	-	5hrs	DOWN
chr15:8046771-8047800	-3.0761	0.0246798	-3.0527	0.330458		-	-	-	5hrs	DOWN
chr15:8732470-8733385	-4.31057	0.0183943	-4.28716	0.415367		-	-	-	5hrs	DOWN
chr17:2821257-2821546	-3.68908	0.0491848	-3.13516	0.534471		-	-	-	5hrs	DOWN
chr17:5500358-5500808	-3.68908	0.0491848	-3.66567	0.604865		-	-	-	5hrs	DOWN
chr18:4546691-4553616	-2.18129	0.0366926	-2.30152	0.130814		-	EVPL	envoplakin	5hrs	DOWN
chr18:4553794-4559038	-2.13	0.0316846	-1.56387	0.253789		-	EVPL	envoplakin	5hrs	DOWN
chr18:4559099-4562787	-2.00424	0.014237	-1.98857	0.0663834		-	EVPL	envoplakin	5hrs	DOWN
chr18:9294379-9296059	-2.27157	0.00855382	-2.30627	0.0621368		-	-	-	5hrs	DOWN
chr19:7032838-7047831	-3.44807	0.0304398	-4.25064	0.186991		ENSGALG00000005055	RAD51C	RAD51_homolog_C_(S._cerevisiae)	5hrs	DOWN
chr19:8707116-8708845	-3.79599	0.0419843	-3.42467	0.441737		ENSGALG00000005549	CUEDC1	CUE_domain_containing_1	5hrs	DOWN
chr19:9100717-9140966	-3.15978	0.032665	-3.06477	0.163189		ENSGALG00000005685	KSR1	kinase_suppressor_of_ras_1	5hrs	DOWN
chr19:9629749-9639145	-2.03303	0.0449543	-2.02413	0.244258		ENSGALG00000005886	WSCD1	WSC_domain_containing_1	5hrs	DOWN
chr19:2590789-2592396	-3.04753	0.0375238	-3.02413	0.435419		-	-	-	5hrs	DOWN
chr19:5098968-5099918	-3.6325	0.0216629	-3.66567	0.363115		ENSGALG00000002631	FAM211A	family_with_sequence_similarity_211,_member_A	5hrs	DOWN
chr19:5274384-5275374	-3.49114	0.0157247	-3.46773	0.289127		-	-	-	5hrs	DOWN
chr2:5162365-5168391	-2.42921	0.0481455	-2.38027	0.309881		ENSGALG00000006028	AXUD1	AXIN1_up-regulated_1	5hrs	DOWN
chr2:9838691-9851892	-2.53884	0.0382318	-2.96523	0.191011		ENSGALG00000006599	ZMYND11	zinc_finger,_MYND_domain_containing_11	5hrs	DOWN
chr2:28771607-28825146	-2.79599	0.0429344	-3.21316	0.27794		ENSGALG00000010836	AHR	aryl_hydrocarbon_receptor	5hrs	DOWN
chr2:33812390-33814941	-3.68908	0.0491848	-4.35755	0.393005		-	-	-	5hrs	DOWN
chr2:51638043-51664946	-1.90375	0.0259323	-1.9386	0.0940628		ENSGALG00000012351	STK17A	serine/threonine_kinase_17a	5hrs	DOWN
chr2:56889699-56909728	-2.51915	0.0291309	-3.13516	0.074444		ENSGALG00000012517	SLC9A3	solute_carrier_family_9_(sodium/hydrogen_exchanger),_member_3	5hrs	DOWN
chr2:61582836-61590763	-3.79599	0.0419843	-4.35755	0.393005		-	KIF13A	kinesin_family_member_13A	5hrs	DOWN
chr2:109301405-109308867	-4.23657	0.0208357	-4.96523	0.210175		ENSGALG00000015143	TTR	Transthyretin	5hrs	DOWN
chr2:4868218-4896411	-4.99338	0.0156445	-4.13516	0.0579177		ENSGALG00000006025	XIRP1	xin_actin-binding_repeat_containing_1	5hrs	DOWN
chr2:12775028-12888862	-2.86311	0.0227126	-3.25064	0.0909738		ENSGALG00000007076	CCNY	cyclin_Y	5hrs	DOWN
chr2:64405961-64411435	-3.68908	0.0491848	-4.4888	0.351497		-	LOC428479	similar_to_MGC82474_protein	5hrs	DOWN
chr2:4865313-4867864	-3.89553	0.00360358	-3.87213	0.102352		-	-	-	5hrs	DOWN
chr2:12772920-12774918	-2.52114	0.0139799	-2.49773	0.153758		-	-	-	5hrs	DOWN
chr2:56920409-56922709	-3.31057	0.00301666	-3.28716	0.0651212		-	-	-	5hrs	DOWN
chr2:65831320-65831682	-4.0761	0.0271229	-4.0527	0.489308		-	-	-	5hrs	DOWN
chr2:84445745-84446715	-2.71111	0.039345	-2.46773	0.402534		-	-	-	5hrs	DOWN
chr2:84846934-84847807	-3.5122	0.0270826	-3.4888	0.420808		-	-	-	5hrs	DOWN
chr2:104160868-104162239	-3.54935	0.00565439	-2.96523	0.0638692		-	-	-	5hrs	DOWN
chr2:130243931-130244434	-4.0761	0.0271229	-4.0527	0.489308		-	-	-	5hrs	DOWN
chr2:150639616-150640598	-4.44807	0.0145238	-4.42467	0.371728		-	-	-	5hrs	DOWN
chr2:150640652-150641412	-3.31057	0.0388706	-3.35755	0.463549		-	-	-	5hrs	DOWN
chr2:150641750-150642619	-3.44807	0.0304398	-3.42467	0.441737		-	-	-	5hrs	DOWN
chr2:150646817-150648068	-3.79599	0.0158849	-3.77259	0.328661		-	-	-	5hrs	DOWN
chr20:9076709-9081328	-3.68908	0.0491848	-4.35755	0.393005		ENSGALG00000005901	PCMTD2	Protein-L-isoaspartate_(D-aspartate)_O-methyltransferase_domain_containing_2	5hrs	DOWN
chr20:11622609-11638771	-2.87438	0.033921	-2.78724	0.0844568		-	-	-	5hrs	DOWN
chr20:528394-529548	-2.53296	0.0459659	-2.50956	0.387686		-	-	-	5hrs	DOWN
chr20:4928010-4928617	-4.0761	0.0271229	-4.0527	0.489308		ENSGALG00000003785	EMILIN3	elastin_microfibril_interfacer_3	5hrs	DOWN
chr20:10087726-10088374	-3.79599	0.0419843	-3.96523	0.516341		-	LOC419282	hypothetical_gene_supported_by_CR354228	5hrs	DOWN
chr20:11620860-11621784	-3.68908	0.0194752	-3.66567	0.363115		-	-	-	5hrs	DOWN
chr21:2659421-2663687	-2.07979	0.0234667	-2.20624	0.137422		-	RNF183	ring_finger_protein_183	5hrs	DOWN
chr21:2906186-2940554	-2.79599	0.0213486	-3.09452	0.124643		-	SAMD11	sterile_alpha_motif_domain_containing_11	5hrs	DOWN
chr21:2313779-2314763	-3.84662	0.0144056	-3.82322	0.312561		ENSGALG00000001600	DVL1	dishevelled,_dsh_homolog_1_(Drosophila)	5hrs	DOWN
chr22:2667513-2669554	-3.15856	0.0304177	-3.23825	0.363881		ENSGALG00000003594	ANK1	ankyrin_1,_erythrocytic	5hrs	DOWN
chr22:2678951-2681053	-4.44807	0.0145238	-4.28716	0.177454		ENSGALG00000003594	ANK1	ankyrin_1,_erythrocytic	5hrs	DOWN
chr24:3527948-3529222	-3.53296	0.0144196	-3.50956	0.275948		-	-	-	5hrs	DOWN
chr26:394957-404811	-2.10893	0.0214046	-2.18155	0.0686174		ENSGALG00000000584	LOC421174	similar_to_protein-tyrosine-phosphatase_(EC_3.1.3.48),_receptor_type_OST	5hrs	DOWN
chr27:1404183-1425484	-3.23657	0.0441775	-3.82322	0.312561		ENSGALG00000000674	MYO1D	myosin_ID	5hrs	DOWN
chr28:966379-969691	-3.68908	0.0491848	-3.4888	0.420808		ENSGALG00000000748	TJP3	Tight_junction_protein_3_(zona_occludens_3)	5hrs	DOWN
chr28:2262668-2263422	-3.23657	0.0441775	-3.21316	0.509902		ENSGALG00000001898	C19orf21	chromosome_19_open_reading_frame_21	5hrs	DOWN
chr3:59163515-59165853	-2.4393	0.0157458	-2.51172	0.0897635		-	CTGF	connective_tissue_growth_factor	5hrs	DOWN
chr3:94471296-94497178	-1.99189	0.0267863	-2.0083	0.113113		-	-	-	5hrs	DOWN
chr3:70773822-70784984	-2.82736	0.00617787	-2.73077	0.0841821		ENSGALG00000015345	AIM1	absent_in_melanoma_1	5hrs	DOWN
chr3:70797751-70808923	-2.38096	0.0461155	-2.6282	0.225711		ENSGALG00000015345	AIM1	absent_in_melanoma_1	5hrs	DOWN
chr3:70810305-70839044	-2.74353	0.0198707	-2.69316	0.237693		ENSGALG00000015345	AIM1	absent_in_melanoma_1	5hrs	DOWN
chr3:80674882-80685326	-2.42921	0.0481455	-1.96523	0.3568		-	DOPEY1	dopey_family_member_1	5hrs	DOWN
chr3:103451563-103457417	-2.34063	0.0138799	-2.77259	0.0582615		-	NT5C1B	5'-nucleotidase,_cytosolic_IB	5hrs	DOWN
chr3:28584267-28584812	-3.89553	0.036076	-3.87213	0.544605		-	-	-	5hrs	DOWN
chr3:69930968-69932624	-3.21746	0.00533147	-3.19405	0.102451		-	-	-	5hrs	DOWN
chr3:69933101-69933506	-3.89553	0.036076	-3.77259	0.574112		-	-	-	5hrs	DOWN
chr3:70809018-70810245	-2.62091	0.046994	-2.28716	0.466811		ENSGALG00000015345	AIM1	absent_in_melanoma_1	5hrs	DOWN
chr3:78116206-78118585	-1.89553	0.0485947	-1.78237	0.295681		-	-	-	5hrs	DOWN
chr3:93699600-93701056	-4.01839	0.00488085	-4.5502	0.116153		-	-	-	5hrs	DOWN
chr3:93701300-93702030	-3.31057	0.0388706	-3.21316	0.509902		-	-	-	5hrs	DOWN
chr3:94497248-94498343	-2.38719	0.0305246	-2.23825	0.277451		-	-	-	5hrs	DOWN
chr3:109988800-109989561	-3.68908	0.0491848	-3.5502	0.636853		ENSGALG00000016651	TDH	L-threonine_dehydrogenase	5hrs	DOWN
chr3:110151501-110153084	-3.84662	0.00410711	-4.21316	0.0948569		-	-	-	5hrs	DOWN
chr4:21502790-21506223	-3.31057	0.0226366	-3.5502	0.263317		ENSGALG00000009278	RBM46	RNA_binding_motif_protein_46	5hrs	DOWN
chr4:23297197-23303980	-2.48049	0.0370941	-2.18763	0.295766		ENSGALG00000020249	RAPGEF2	Rap_guanine_nucleotide_exchange_factor_(GEF)_2	5hrs	DOWN
chr4:48401076-48405121	-3.79599	0.0419843	-3.21316	0.509902		-	-	-	5hrs	DOWN
chr4:59365937-59368567	-3.60335	0.00762628	-4.02413	0.134215		-	PITX2	paired-like_homeodomain_2	5hrs	DOWN
chr4:66441932-66446566	-2.62607	0.0223307	-3.13516	0.144827		ENSGALG00000013715	DLC1	deleted_in_liver_cancer_1	5hrs	DOWN
chr4:17748607-17776315	-3.8375	0.0108584	-3.84788	0.107255		-	LOC396318	Mel-1c_melatonin_receptor	5hrs	DOWN
chr4:35232455-35258224	-3.00332	0.0377151	-4.91943	0.222709		-	-	-	5hrs	DOWN
chr4:17746385-17747155	-3.98864	0.0311908	-3.96523	0.516341		-	-	-	5hrs	DOWN
chr4:21509786-21510450	-3.68908	0.0491848	-2.66567	0.671461		-	-	-	5hrs	DOWN
chr4:51245259-51247252	-2.34063	0.0138799	-2.30227	0.141293		-	-	-	5hrs	DOWN
chr4:63352769-63353458	-3.89553	0.036076	-3.77259	0.574112		-	-	-	5hrs	DOWN
chr4:83503944-83508409	-1.7371	0.0220645	-1.73077	0.058559		-	-	-	5hrs	DOWN
chr5:1574069-1578869	-3.02426	0.0203909	-3.0527	0.207185		ENSGALG00000004267	SIGIRR	single_immunoglobulin_and_toll-interleukin_1_receptor_(TIR)_domain	5hrs	DOWN
chr5:54442606-54450134	-4.11792	0.00839715	-5.4888	0.0921467		-	C14orf79	chromosome_14_open_reading_frame_79	5hrs	DOWN
chr5:1579787-1589941	-2.23699	0.0211738	-2.33156	0.0501872		ENSGALG00000004260	PKP3	plakophilin_3	5hrs	DOWN
chr5:40544639-40548094	-2.79599	0.0429344	-3.21316	0.27794		-	-	-	5hrs	DOWN
chr5:43305572-43307001	-3.79599	0.0419843	-3.0527	0.559983		ENSGALG00000010579	STON2	stonin_2	5hrs	DOWN
chr5:3414740-3417414	-2.48614	0.010657	-2.46273	0.121612		-	-	-	5hrs	DOWN
chr5:3522073-3522881	-2.98864	0.0418644	-2.96523	0.455077		-	-	-	5hrs	DOWN
chr5:3523011-3523980	-3.68908	0.0194752	-3.66567	0.363115		-	-	-	5hrs	DOWN
chr5:8970648-8973028	-3.96592	0.00297456	-3.96523	0.0847883		-	-	-	5hrs	DOWN
chr5:9938840-9939299	-5.19809	0.00370239	-5.35755	0.116876		-	ADM	adrenomedullin	5hrs	DOWN
chr5:14773643-14774248	-3.89553	0.0130966	-4.87213	0.23595		-	-	-	5hrs	DOWN
chr5:46886661-46887372	-3.5736	0.0241781	-2.5502	0.501172		-	-	-	5hrs	DOWN
chr6:21493043-21498204	-2.39463	0.0341623	-3.00086	0.100471		ENSGALG00000006629	RBP4	retinol_binding_protein_4,_plasma	5hrs	DOWN
chr6:1526903-1527592	-3.68908	0.0491848	-3.66567	0.604865		-	-	-	5hrs	DOWN
chr6:25248823-25250028	-2.74353	0.047418	-3.13516	0.398263		ENSGALG00000008293	SH3PXD2A	SH3_and_PX_domains_2A	5hrs	DOWN
chr7:22713218-22757360	-3.0761	0.0246798	-3.87213	0.102352		-	DPP4	dipeptidyl-peptidase_4_(CD26,_adenosine_deaminase_complexing_protein_2)	5hrs	DOWN
chr7:24934587-25012180	-2.6516	0.0360232	-3.0527	0.207185		-	-	-	5hrs	DOWN
chr7:28064111-28120925	-1.93054	0.0471406	-1.90167	0.17121		ENSGALG00000011679	DIRC2	disrupted_in_renal_carcinoma_2	5hrs	DOWN
chr7:29386609-29416664	-2.76469	0.0435145	-3.10274	0.0802787		ENSGALG00000011744	KALRN	kalirin,_RhoGEF_kinase	5hrs	DOWN
chr7:29417484-29428556	-2.52114	0.0139799	-2.61924	0.0859181		ENSGALG00000011744	KALRN	kalirin,_RhoGEF_kinase	5hrs	DOWN
chr7:763842-821940	-2.79599	0.0429344	-3.02413	0.215726		ENSGALG00000002585	GULP1	GULP,_engulfment_adaptor_PTB_domain_containing_1	5hrs	DOWN
chr7:3047641-3048810	-3.53296	0.0144196	-3.50956	0.275948		-	-	-	5hrs	DOWN
chr7:21596584-21598630	-2.12614	0.038455	-2.10274	0.26447		-	-	-	5hrs	DOWN
chr7:21601279-21603111	-3.84662	0.00410711	-3.82322	0.112381		-	-	-	5hrs	DOWN
chr7:24932132-24932741	-3.98864	0.0311908	-3.87213	0.544605		-	-	-	5hrs	DOWN
chr7:25018281-25019965	-3.5122	0.00209731	-3.4888	0.0517155		-	-	-	5hrs	DOWN
chr7:27606044-27607509	-4.46977	0.00151771	-4.44636	0.0572731		-	-	-	5hrs	DOWN
chr7:27607562-27608415	-4.34619	0.00520144	-4.32279	0.168378		-	-	-	5hrs	DOWN
chr7:27608569-27610235	-2.75417	0.0132557	-2.73077	0.167385		-	-	-	5hrs	DOWN
chr8:17035076-17046821	-3.44807	0.0073909	-3.57404	0.117569		-	SYDE2	Synapse_defective_1,_Rho_GTPase,_homolog_2_(C._elegans)	5hrs	DOWN
chr8:8277779-8336769	-2.04567	0.018242	-1.92776	0.105077		ENSGALG00000004812	FAM129A	family_with_sequence_similarity_129,_member_A	5hrs	DOWN
chr8:16906546-16908610	-2.01967	0.0282681	-2.03562	0.160766		-	CYR61	cysteine-rich,_angiogenic_inducer,_61	5hrs	DOWN
chr8:1779666-1780348	-4.0761	0.0271229	-4.0527	0.489308		-	-	-	5hrs	DOWN
chr8:1780871-1781448	-3.89553	0.036076	-3.87213	0.544605		-	-	-	5hrs	DOWN
chr8:4331231-4331805	-3.79599	0.0419843	-3.77259	0.574112		ENSGALG00000003035	FAM78B	family_with_sequence_similarity_78,_member_B	5hrs	DOWN
chr8:17026741-17027121	-3.68908	0.0491848	-3.66567	0.604865		-	SYDE2	Synapse_defective_1,_Rho_GTPase,_homolog_2_(C._elegans)	5hrs	DOWN
chr8:20352255-20352996	-3.79599	0.0419843	-3.77259	0.574112		-	-	-	5hrs	DOWN
chr9:25377807-25417855	-2.92724	0.0468578	-3.77259	0.328661		ENSGALG00000010412	WWTR1	WW_domain_containing_transcription_regulator_1	5hrs	DOWN
chr9:16092617-16093402	-2.79599	0.0263972	-3.01586	0.176598		-	LOC424918	hypothetical_LOC424918	5hrs	DOWN
chr9:16112952-16117255	-4.0761	0.0271229	-3.5502	0.400744		ENSGALG00000007557	KIAA0226	KIAA0226	5hrs	DOWN
chrE22C19W28_E50C23:772882-774350	-3.05473	0.00860577	-3.13516	0.115276		ENSGALG00000010254	FAIM2	Fas_apoptotic_inhibitory_molecule_2	5hrs	DOWN
chrE22C19W28_E50C23:838051-838819	-3.23657	0.0441775	-3.21316	0.509902		-	-	-	5hrs	DOWN
chrUn_random:48530654-48531594	-4.89553	0.00652731	-2.85832	0.071187		-	-	-	5hrs	DOWN
chrUn_random:4813297-4813659	-4.5736	0.0116495	-4.5502	0.332276		-	-	-	5hrs	DOWN
chrUn_random:8066713-8067981	-5.15856	0.00399343	-5.17469	0.156973		-	-	-	5hrs	DOWN
chrUn_random:26223971-26226645	-2.49114	0.00935164	-2.46773	0.109306		-	-	-	5hrs	DOWN
chrUn_random:28849705-28851213	-3.02426	0.00590755	-3.03562	0.0932631		-	-	-	5hrs	DOWN
chrUn_random:39078069-39079271	-2.84662	0.0389616	-2.73077	0.367934		-	-	-	5hrs	DOWN
chrUn_random:39080526-39081946	-2.71656	0.0212581	-2.15788	0.161617		-	-	-	5hrs	DOWN
chrUn_random:39438789-39439300	-4.15856	0.0237126	-4.13516	0.463486		-	-	-	5hrs	DOWN
chrUn_random:48535096-48535528	-3.89553	0.0130966	-3.87213	0.29718		-	-	-	5hrs	DOWN
chrUn_random:51631206-51632211	-3.5122	0.0270826	-2.47981	0.350357		-	LACTB2	lactamase,_beta_2	5hrs	DOWN
chrUn_random:52879337-52880133	-3.68908	0.0491848	-3.66567	0.363115		-	-	-	5hrs	DOWN
chrZ:233218-234383	-3.68908	0.0491848	-3.21316	0.509902		ENSGALG00000003253	ATP8B1	ATPase,_class_I,_type_8B,_member_1	5hrs	DOWN
chrZ:12251056-12262553	-4.74353	0.00860182	-4.72012	0.280272		ENSGALG00000014824	PTGER4	prostaglandin_E_receptor_4_(subtype_EP4)	5hrs	DOWN
chrZ:12905425-12988509	-2.33914	0.0390078	-2.52817	0.203633		ENSGALG00000014855	GHR	growth_hormone_receptor	5hrs	DOWN
chrZ:27123347-27225462	-2.09298	0.0295939	-2.43555	0.0688767		ENSGALG00000010164	SMARCA2	SWI/SNF_related,_matrix_associated,_actin_dependent_regulator_of_chromatin,_subfamily_a,_member_2	5hrs	DOWN
chrZ:459758-467231	-3.44807	0.0304398	-3.17469	0.290318		ENSGALG00000003019	WDR7	WD_repeat_domain_7	5hrs	DOWN
chrZ:9408204-9413862	-2.76625	0.0229126	-2.85832	0.223101		ENSGALG00000017405	NPR3	natriuretic_peptide_receptor_C/guanylate_cyclase_C_(atrionatriuretic_peptide_receptor_C)	5hrs	DOWN
chrZ:15808387-15811836	-2.00656	0.0162115	-2.00086	0.0832025		-	-	-	5hrs	DOWN
chrZ:55681456-55703833	-2.36061	0.0159379	-2.44032	0.0624682		ENSGALG00000014686	FBN2	fibrillin_2	5hrs	DOWN
chrZ:9402302-9403845	-2.38719	0.0305246	-2.41269	0.241143		-	-	-	5hrs	DOWN
chrZ:22149200-22151278	-3.87128	0.00384598	-3.87213	0.102352		-	LOC395628	osteoblast_membrane_protein	5hrs	DOWN
chrZ:22151475-22153012	-2.98864	0.0131987	-2.96523	0.191011		-	LOC395628	osteoblast_membrane_protein	5hrs	DOWN
chrZ:33514269-33515012	-4.0761	0.0271229	-4.0527	0.489308		-	-	-	5hrs	DOWN
chrZ:34471692-34472621	-4.31057	0.0183943	-4.28716	0.415367		-	-	-	5hrs	DOWN
chrZ:36900345-36903336	-2.10015	0.0170191	-2.03799	0.129248		ENSGALG00000015165	LOC427259	hypothetical_LOC427259	5hrs	DOWN
chrZ:67009927-67011511	-3.5122	0.00948447	-3.4888	0.19488		-	-	-	5hrs	DOWN
chrZ:73601288-73601859	-3.79599	0.0419843	-3.77259	0.574112		-	-	-	5hrs	DOWN
chr1:81531874-81580212	-3.13972	0.551866	-2.88277	0.0368783		ENSGALG00000014723	GABARAPL3	GABA(A)_receptors_associated_protein_like_3	5hrs	DOWN
chr1:81531874-81580212	-3.01025	0.297372	-2.82084	0.0298439		ENSGALG00000014723	GABARAPL3	GABA(A)_receptors_associated_protein_like_3	5hrs	DOWN
chr1:61438247-61485266	-1.56973	0.0521073	-1.5041	0.0102094		ENSGALG00000012936	C12orf35	chromosome_12_open_reading_frame_35	5hrs	DOWN
chr1:120926932-120930327	-1.52005	0.133676	-1.90752	0.0139733		ENSGALG00000016539	LOC426510	hypothetical_gene_supported_by_CR406681	5hrs	DOWN
chr13:8015252-8103309	-1.97236	0.0975192	-2.18528	0.0388851		-	-	-	5hrs	DOWN
chr19:9149446-9159104	-2.09316	0.214344	-2.1463	0.0466863		ENSGALG00000005685	KSR1	kinase_suppressor_of_ras_1	5hrs	DOWN
chr2:21647030-21656754	-2.25621	0.190732	-2.53408	0.0303426		ENSGALG00000009026	LOC420542	hypothetical_LOC420542	5hrs	DOWN
chr2:2359141-2451014	-2.60164	0.10541	-3.24409	0.000544991		ENSGALG00000005396	WNT3A	wingless-type_MMTV_integration_site_family,_member_3A_(WNT3A)	5hrs	DOWN
chr2:3131739-3153479	-2.92243	0.0563964	-2.1464	0.00108554		ENSGALG00000005417	JMJD4	jumonji_domain_containing_4	5hrs	DOWN
chr2:9420188-9466286	-1.59104	0.274353	-1.89868	0.000383146		-	NCAPG2	non-SMC_condensin_II_complex,_subunit_G2	5hrs	DOWN
chr2:104162310-104200293	-1.5645	0.0593801	-1.56952	0.00640922		ENSGALG00000014815	EMILIN2	elastin_microfibril_interfacer_2	5hrs	DOWN
chr2:154607215-154828770	-2.14322	0.172171	-2.04186	0.0382294		ENSGALG00000004967	MAPK15	mitogen-activated_protein_kinase_15	5hrs	DOWN
chr20:5090442-5107063	-2.0885	0.0543761	-2.49209	0.00020496		-	-	-	5hrs	DOWN
chr25:1987012-1999678	-1.85242	0.0652409	-1.99077	0.0260296		ENSGALG00000000935	TUFT1	Tuftelin_1	5hrs	DOWN
chr27:4765746-4780278	-2.82465	0.130306	-3.21899	0.0310968		-	LOC420008	similar_to_Rho-related_GTP-binding_protein_RhoN_(Rho7)	5hrs	DOWN
chr27:4202595-4282694	-1.50046	0.109886	-1.74507	1.12e-05		ENSGALG00000003856	KRT10	keratin_10	5hrs	DOWN
chr3:21102219-21469811	-2.09402	0.114269	-1.97323	0.00414489		-	-	-	5hrs	DOWN
chr5:3287018-3411373	-1.78945	0.0766672	-1.67095	0.0123033		ENSGALG00000013311	ANO3	anoctamin-3_isoform_1	5hrs	DOWN
chr5:31697762-31721616	-2.35018	0.712363	-1.86783	1.78e-05		-	-	-	5hrs	DOWN
chrE22C19W28_E50C23:686928-704266	-1.51815	0.08889	-1.54655	3e-05		ENSGALG00000010250	LOC395772	otokeratin	5hrs	DOWN
chrZ:21387910-21433022	-1.58389	0.0584237	-1.53546	0.0017758		-	-	-	5hrs	DOWN
chrZ:39642232-39691793	-1.78736	0.186938	-2.15622	2.48e-06		ENSGALG00000012593	SLC28A3	solute_carrier_family_28_(sodium-coupled_nucleoside_transporter),_member_3	5hrs	DOWN
chr1:15775547-15780282	-3.44807	0.0689941	-4.13516	0.463486		ENSGALG00000007998	SLC26A4	solute_carrier_family_26,_member_4	5hrs	DOWN
chr1:24411192-24512797	-1.71446	0.115423	-1.76274	0.303599		ENSGALG00000008926	CADPS2	Ca++-dependent_secretion_activator_2	5hrs	DOWN
chr1:24525026-24551729	-1.6516	0.212698	-1.5502	0.522284		ENSGALG00000008926	CADPS2	Ca++-dependent_secretion_activator_2	5hrs	DOWN
chr1:24589647-24615704	-1.5736	0.218357	-1.80174	0.59285		ENSGALG00000008926	CADPS2	Ca++-dependent_secretion_activator_2	5hrs	DOWN
chr1:42066088-42082761	-1.98864	0.111273	-1.64973	0.462028		ENSGALG00000010940	ACSS3	acyl-CoA_synthetase_short-chain_family_member_3	5hrs	DOWN
chr1:61617924-61622361	-2.79599	0.0894179	-2.18763	0.693783		ENSGALG00000012944	DENND5B	DENN/MADD_domain_containing_5B	5hrs	DOWN
chr1:61651715-61657379	-2.68908	0.0524948	-3.25064	0.26604		ENSGALG00000012944	DENND5B	DENN/MADD_domain_containing_5B	5hrs	DOWN
chr1:66701488-66747002	-1.65849	0.144563	-1.96523	0.335607		ENSGALG00000013136	AEBP2	AE_binding_protein_2	5hrs	DOWN
chr1:67469633-67470556	-1.72561	0.276151	-2.08071	0.721887		ENSGALG00000013173	PYROXD1	pyridine_nucleotide-disulphide_oxidoreductase_domain_1	5hrs	DOWN
chr1:76473125-76475153	-2.79599	0.0894179	-3.13516	0.534471		ENSGALG00000017271	ANO2	anoctamin_2	5hrs	DOWN
chr1:76732699-76757279	-1.57599	0.0916049	-1.52348	0.0603477		ENSGALG00000017274	CD9	CD9_molecule	5hrs	DOWN
chr1:79773936-79811853	-3.44807	0.0689941	-3.5502	0.636853		ENSGALG00000014407	CASR	calcium-sensing_receptor	5hrs	DOWN
chr1:109419902-109420623	-2.03927	0.101731	-2.15788	0.466636		-	-	-	5hrs	DOWN
chr1:123848564-123849919	-2.68908	0.104472	-2.66567	0.671461		ENSGALG00000016511	GPR64	G_protein-coupled_receptor_64	5hrs	DOWN
chr1:127888265-127904574	-1.86311	0.235389	-1.73077	0.698575		ENSGALG00000016602	ARHGAP6	Rho_GTPase_activating_protein_6	5hrs	DOWN
chr1:179518410-179528315	-2.49114	0.0984291	-1.90383	0.59934		-	KATNAL1	katanin_p60_subunit_A-like_1	5hrs	DOWN
chr1:182991149-182993255	-1.66671	0.113178	-1.74284	0.424148		ENSGALG00000017130	LATS2	LATS,_large_tumor_suppressor,_homolog_2_(Drosophila)	5hrs	DOWN
chr1:199261377-199262517	-1.5736	0.202181	-2.38027	0.433677		-	TPP1	Tripeptidyl_peptidase_I	5hrs	DOWN
chr1:6512209-6560958	-2.31057	0.668614	-2.22827	0.541874		ENSGALG00000013967	NUDT5	nudix_(nucleoside_diphosphate_linked_moiety_X)-type_motif_5	5hrs	DOWN
chr1:20467673-20469049	-1.98864	0.168205	-2.13516	0.634461		-	LOC768655	similar_to_pim-3_protein	5hrs	DOWN
chr1:26853092-26867447	-3.36808	0.198736	-5.09452	0.176485		ENSGALG00000009393	CAV1	caveolin_1,_caveolae_protein,_22kDa	5hrs	DOWN
chr1:26875377-26883231	-2.40368	0.112735	-2.5502	0.588959		ENSGALG00000009396	CAV2	caveolin_2	5hrs	DOWN
chr1:27566999-27611975	-1.68908	0.168234	-1.77259	0.506612		ENSGALG00000009424	FOXP2	forkhead_box_P2	5hrs	DOWN
chr1:39921883-39959690	-1.79599	0.140817	-1.90865	0.378943		ENSGALG00000010246	OSBPL8	oxysterol_binding_protein-like_8	5hrs	DOWN
chr1:44704235-44707738	-2.44807	0.14498	-2.08071	0.721887		ENSGALG00000011177	CEP290	centrosomal_protein_290kDa	5hrs	DOWN
chr1:44854580-44909374	-2.36189	0.0991164	-2.5975	0.113257		ENSGALG00000011206	KITLG	KIT_ligand	5hrs	DOWN
chr1:61097355-61099577	-2.15856	0.130368	-2.21316	0.610546		ENSGALG00000012932	FGD4	FYVE,_RhoGEF_and_PH_domain_containing_4	5hrs	DOWN
chr1:69994226-69999441	-1.948	0.0984375	-1.93722	0.36773		ENSGALG00000014071	ITPR2	inositol_1,4,5-triphosphate_receptor,_type_2	5hrs	DOWN
chr1:70000455-70004130	-1.75417	0.204318	-1.90383	0.59934		ENSGALG00000014071	ITPR2	inositol_1,4,5-triphosphate_receptor,_type_2	5hrs	DOWN
chr1:70004307-70005860	-2.44807	0.14498	-2.66567	0.671461		ENSGALG00000014071	ITPR2	inositol_1,4,5-triphosphate_receptor,_type_2	5hrs	DOWN
chr1:70017684-70038508	-2.40368	0.112735	-2.39819	0.483755		ENSGALG00000014071	ITPR2	inositol_1,4,5-triphosphate_receptor,_type_2	5hrs	DOWN
chr1:70507458-70518108	-1.95211	0.0896085	-1.86335	0.44471		ENSGALG00000014128	A4GALT	alpha_1,4-galactosyltransferase_(globotriaosylceramide_synthase)	5hrs	DOWN
chr1:88608621-88614934	-2.68908	0.104472	-3.02413	0.435419		ENSGALG00000015323	SENP7	SUMO1/sentrin_specific_peptidase_7	5hrs	DOWN
chr1:88618492-88620185	-3.31057	0.0827423	-3.77259	0.574112		-	-	-	5hrs	DOWN
chr1:108493089-108493996	-2.44807	0.14498	-2.08071	0.721887		ENSGALG00000015907	SYNJ1	synaptojanin_1	5hrs	DOWN
chr1:116756832-116772882	-2.31057	0.102187	-2.42467	0.542894		ENSGALG00000016262	XK	X-linked_Kx_blood_group	5hrs	DOWN
chr1:183342558-183346156	-1.98864	0.143743	-2.66567	0.462093		ENSGALG00000017139	ZMYM2	zinc_finger,_MYM-type_2	5hrs	DOWN
chr1:199402554-199405921	-1.8329	0.229716	-1.6282	0.687133		ENSGALG00000017343	FOLR1	folate_receptor_1_(adult)	5hrs	DOWN
chr1:7168071-7168532	-3.31057	0.0827423	-3.28716	0.704402			-	-	5hrs	DOWN
chr1:13689674-13689940	-3.31057	0.0827423	-3.28716	0.704402		-	PION	Pigeon_homolog_(Drosophila)	5hrs	DOWN
chr1:14793992-14794548	-2.5736	0.0862496	-2.5502	0.588959		-	MLL5	Myeloid/lymphoid_or_mixed-lineage_leukemia_5_(trithorax_homolog,_Drosophila)	5hrs	DOWN
chr1:14997162-14997589	-2.31057	0.17236	-1.7022	0.810367		-	ATXN7L1	Ataxin_7-like_1	5hrs	DOWN
chr1:17013647-17014292	-2.21103	0.14956	-2.18763	0.693783		-	-	-	5hrs	DOWN
chr1:19256714-19257114	-1.83664	0.181314	-1.81323	0.491118		-	-	-	5hrs	DOWN
chr1:31732329-31733249	-2.72561	0.0669175	-2.7022	0.541233		ENSGALG00000009572	ADAMTS20	ADAM_metallopeptidase_with_thrombospondin_type_1_motif,_20	5hrs	DOWN
chr1:33737671-33738008	-3.44807	0.0689941	-4.42467	0.371728		-	-	-	5hrs	DOWN
chr1:33739260-33739956	-2.68908	0.104472	-2.28716	0.466811		-	-	-	5hrs	DOWN
chr1:38200915-38202123	-3.0761	0.0577766	-3.0527	0.559983		ENSGALG00000010163	LGR5	leucine-rich_repeat-containing_G_protein-coupled_receptor_5	5hrs	DOWN
chr1:40162929-40163527	-2.11417	0.0584374	-2.09077	0.357104			-	-	5hrs	DOWN
chr1:44851863-44852352	-2.31057	0.17236	-2.13516	0.797025		-	-	-	5hrs	DOWN
chr1:44852408-44852975	-3.5736	0.058031	-3.42467	0.670048		-	-	-	5hrs	DOWN
chr1:51948520-51949433	-2.03303	0.0923577	-1.96523	0.497699		-	-	-	5hrs	DOWN
chr1:52700891-52701413	-3.0761	0.0577766	-3.0527	0.559983		-	-	-	5hrs	DOWN
chr1:52703490-52703746	-2.31057	0.17236	-2.28716	0.764468			-	-	5hrs	DOWN
chr1:52703923-52704904	-2.12614	0.114976	-2.10274	0.583604			-	-	5hrs	DOWN
chr1:53185229-53186330	-2.05903	0.128416	-1.77259	0.642122		-	LOC418040	hypothetical_gene_supported_by_CR387739	5hrs	DOWN
chr1:55129008-55129834	-3.15856	0.0504137	-3.13516	0.534471			-	-	5hrs	DOWN
chr1:57798401-57798787	-3.31057	0.0827423	-2.28716	0.764468		-	-	-	5hrs	DOWN
chr1:58202270-58202533	-3.31057	0.0827423	-3.28716	0.704402		-	-	-	5hrs	DOWN
chr1:58204528-58205111	-2.44807	0.14498	-2.42467	0.732645		-	-	-	5hrs	DOWN
chr1:58988543-58988942	-2.40368	0.112735	-1.64331	0.723389		ENSGALG00000012865	BRAF	v-raf_murine_sarcoma_viral_oncogene_homolog_B1	5hrs	DOWN
chr1:61092731-61093171	-3.31057	0.0827423	-3.5502	0.636853		-	-	-	5hrs	DOWN
chr1:61094712-61095331	-1.72561	0.276151	-1.7022	0.810367		-	-	-	5hrs	DOWN
chr1:61659169-61660080	-2.49114	0.0984291	-2.46773	0.614		-	-	-	5hrs	DOWN
chr1:61660143-61660437	-2.44807	0.14498	-2.42467	0.732645		-	-	-	5hrs	DOWN
chr1:68881594-68882166	-1.5736	0.261161	-1.5502	0.748799		-	-	-	5hrs	DOWN
chr1:68882688-68883259	-3.44807	0.0689941	-3.42467	0.670048		-	-	-	5hrs	DOWN
chr1:68883344-68884155	-2.68908	0.104472	-2.66567	0.671461		-	-	-	5hrs	DOWN
chr1:68884461-68884982	-1.86311	0.235389	-1.8397	0.780215			-	-	5hrs	DOWN
chr1:69014697-69015131	-3.31057	0.0827423	-3.28716	0.704402		ENSGALG00000013229	CMAS	cytidine_monophosphate_N-acetylneuraminic_acid_synthetase	5hrs	DOWN
chr1:70506880-70507404	-1.66671	0.230747	-1.64331	0.723389		-	-	-	5hrs	DOWN
chr1:73427829-73428066	-2.5736	0.122722	-3.0527	0.559983		-	-	-	5hrs	DOWN
chr1:74367905-74368536	-2.44807	0.14498	-2.42467	0.732645		-	-	-	5hrs	DOWN
chr1:76763152-76763628	-1.72561	0.276151	-1.7022	0.810367		-	-	-	5hrs	DOWN
chr1:78996667-78997446	-2.44807	0.14498	-2.42467	0.732645		-	-	-	5hrs	DOWN
chr1:80460616-80483724	-1.75417	0.710541	-1.73077	0.698575		ENSGALG00000014554	ATN1	atrophin_1	5hrs	DOWN
chr1:80963416-80964939	-1.98864	0.111273	-1.96523	0.535802		-	-	-	5hrs	DOWN
chr1:80985059-80985557	-2.31057	0.17236	-2.28716	0.764468		ENSGALG00000014736	KEL	Kell_blood_group,_metallo-endopeptidase	5hrs	DOWN
chr1:81531874-81580212	-3.79599	0.674233	-3.5502	0.263317		ENSGALG00000014723	GABARAPL3	GABA(A)_receptors_associated_protein_like_3	5hrs	DOWN
chr1:83245849-83246822	-1.79599	0.171179	-1.77259	0.642122			-	-	5hrs	DOWN
chr1:91716803-91717127	-1.72561	0.276151	-1.7022	0.810367		-	-	-	5hrs	DOWN
chr1:91717227-91718252	-2.36715	0.0755852	-2.34375	0.502539		-	-	-	5hrs	DOWN
chr1:94519865-94520857	-1.5736	0.261161	-1.5502	0.748799		-	-	-	5hrs	DOWN
chr1:94520992-94521515	-3.31057	0.0827423	-3.28716	0.704402		-	-	-	5hrs	DOWN
chr1:100291106-100291528	-3.31057	0.0827423	-3.28716	0.704402		-	-	-	5hrs	DOWN
chr1:106485302-106486331	-2.38096	0.0908437	-2.28716	0.587314		ENSGALG00000015792	ADAMTS1	ADAM_metallopeptidase_with_thrombospondin_type_1_motif,_1	5hrs	DOWN
chr1:107919568-108064766	-2.79598	0.607864	-2.66567	0.671461		ENSGALG00000015842	TIAM1	T-cell_lymphoma_invasion_and_metastasis_1	5hrs	DOWN
chr1:109127223-109127693	-3.44807	0.0689941	-3.28716	0.704402		-	-	-	5hrs	DOWN
chr1:113579493-113579994	-3.31057	0.0827423	-3.13516	0.739838			-	-	5hrs	DOWN
chr1:120948242-120948536	-1.86311	0.235389	-2.18763	0.3802		ENSGALG00000022791	LOC418592	hypothetical_LOC418592	5hrs	DOWN
chr1:121887006-121887830	-2.89553	0.0769295	-2.77259	0.642194		-	-	-	5hrs	DOWN
chr1:123265194-123265606	-1.75417	0.204318	-1.64331	0.723389			-	-	5hrs	DOWN
chr1:124187516-124187973	-2.31057	0.17236	-2.13516	0.797025		-	-	-	5hrs	DOWN
chr1:126433481-126433803	-1.86311	0.235389	-1.7022	0.810367		ENSGALG00000016584	EGFL6	EGF-like-domain,_multiple_6	5hrs	DOWN
chr1:134430966-134431460	-2.5736	0.122722	-2.42467	0.732645			-	-	5hrs	DOWN
chr1:137624856-137625512	-2.44807	0.14498	-1.8397	0.780215		-	SEC61B	Sec61_beta_subunit	5hrs	DOWN
chr1:139364031-139364413	-2.31057	0.17236	-2.13516	0.797025		-	-	-	5hrs	DOWN
chr1:139364757-139365365	-3.31057	0.0827423	-3.13516	0.739838		-	-	-	5hrs	DOWN
chr1:140485573-140486015	-2.79599	0.0894179	-2.66567	0.671461			-	-	5hrs	DOWN
chr1:142008918-142009348	-2.44807	0.14498	-2.28716	0.764468		-	-	-	5hrs	DOWN
chr1:150487296-150487669	-2.68908	0.104472	-1.5502	0.791927		-	-	-	5hrs	DOWN
chr1:153574824-153575961	-1.66671	0.151582	-1.75531	0.271186		-	-	-	5hrs	DOWN
chr1:158549981-158550278	-3.31057	0.0827423	-3.13516	0.739838		-	-	-	5hrs	DOWN
chr1:158835569-158835993	-1.72561	0.276151	-1.7022	0.810367		-	-	-	5hrs	DOWN
chr1:158837340-158837946	-1.98864	0.143743	-1.91277	0.554317		-	-	-	5hrs	DOWN
chr1:159954375-159955017	-1.98864	0.168205	-1.5502	0.748799			-	-	5hrs	DOWN
chr1:164228218-164228661	-2.5122	0.0723666	-1.80174	0.59285		-	-	-	5hrs	DOWN
chr1:175737327-175738336	-2.10412	0.102771	-2.02413	0.558771		ENSGALG00000017041	FREM2	FRAS1_related_extracellular_matrix_protein_2	5hrs	DOWN
chr1:179385608-179386148	-1.98864	0.168205	-1.87213	0.710258		-	-	-	5hrs	DOWN
chr1:183091612-183092436	-1.66671	0.230747	-1.5502	0.748799			-	-	5hrs	DOWN
chr1:187052559-187053004	-3.5736	0.058031	-2.42467	0.732645		-	C11orf70	chromosome_11_open_reading_frame_70	5hrs	DOWN
chr1:193092884-193093428	-1.86311	0.235389	-1.7022	0.810367		-	PRSS23	protease,_serine,_23	5hrs	DOWN
chr1:193093533-193094830	-2.19027	0.10317	-2.42467	0.542894		ENSGALG00000017244	PRSS23	protease,_serine,_23	5hrs	DOWN
chr1:193094905-193095363	-2.89553	0.0769295	-2.77259	0.642194		ENSGALG00000017244	PRSS23	protease,_serine,_23	5hrs	DOWN
chr1:193324015-193324699	-2.89553	0.0769295	-3.77259	0.574112		-	-	-	5hrs	DOWN
chr1:197692767-197693219	-2.5736	0.122722	-3.42467	0.670048		-	-	-	5hrs	DOWN
chr1:198385087-198385377	-2.44807	0.14498	-3.28716	0.704402		-	-	-	5hrs	DOWN
chr10:14513948-14517027	-2.31057	0.348672	-1.66567	0.764076		ENSGALG00000006534	PEX11A	peroxisomal_biogenesis_factor_11A	5hrs	DOWN
chr10:16037460-16124172	-1.98864	0.0833658	-1.80654	0.442178		ENSGALG00000006871	SLCO3A1	solute_carrier_organic_anion_transporter_family,_member_3A1	5hrs	DOWN
chr10:10635259-10637759	-2.10412	0.17327	-1.61731	0.65447		ENSGALG00000004805	DMXL2	Dmx-like_2_(DMXL2)	5hrs	DOWN
chr10:10654693-10656300	-1.5736	0.289847	-1.61731	0.65447		-	-	-	5hrs	DOWN
chr10:20087339-20095692	-1.50321	0.241963	-1.7022	0.561541		ENSGALG00000007410	IGDCC4	immunoglobulin_superfamily,_DCC_subclass,_member_4	5hrs	DOWN
chr10:22250995-22252356	-2.19027	0.10317	-2.08071	0.539309		ENSGALG00000008336	MAN2A2	mannosidase,_alpha,_class_2A,_member_2	5hrs	DOWN
chr10:22253670-22254744	-2.79599	0.0894179	-2.8397	0.496627		-	-	-	5hrs	DOWN
chr10:315805-316513	-2.5736	0.0648412	-2.5502	0.501172		-	-	-	5hrs	DOWN
chr10:1393214-1393571	-2.23657	0.115261	-2.21316	0.610546		-	-	-	5hrs	DOWN
chr10:5374904-5375502	-2.21103	0.14956	-1.77259	0.736847		-	-	-	5hrs	DOWN
chr10:6346836-6347622	-2.44807	0.14498	-2.42467	0.732645		-	-	-	5hrs	DOWN
chr10:11381190-11381874	-1.76625	0.161907	-1.5502	0.644815		-	-	-	5hrs	DOWN
chr10:14517082-14518347	-1.79599	0.120442	-1.77259	0.506612		-	-	-	5hrs	DOWN
chr10:16806820-16807366	-1.98864	0.201543	-1.96523	0.750708		-	-	-	5hrs	DOWN
chr10:16807736-16808553	-3.15856	0.0504137	-3.13516	0.534471		-	-	-	5hrs	DOWN
chr10:20082656-20083051	-1.98864	0.201543	-1.5502	0.791927		-	-	-	5hrs	DOWN
chr10:21303056-21303490	-1.72561	0.276151	-1.7022	0.810367		-	-	-	5hrs	DOWN
chr11:3443549-3444211	-1.5736	0.374589	-1.5502	0.898096		-	SLC4A1	solute_carrier_family_4,_anion_exchanger,_member_1	5hrs	DOWN
chr11:8289093-8293039	-1.68908	0.25189	-1.77259	0.642122		ENSGALG00000004158	GPT2	glutamic_pyruvate_transaminase_(alanine_aminotransferase)_2	5hrs	DOWN
chr11:15217512-15220020	-2.5736	0.122722	-2.66567	0.671461		ENSGALG00000005347	ADAMTS18	ADAM_metallopeptidase_with_thrombospondin_type_1_motif,_18	5hrs	DOWN
chr11:20412168-20418979	-2.20365	0.155456	-2.30404	0.165435		ENSGALG00000006340/ENSGALG00000006815	FAM38A/LOC425332	FAM38A	5hrs	DOWN
chr11:20422701-20424388	-1.92153	0.0878093	-1.6242	0.388671		-	-	-	5hrs	DOWN
chr11:20806538-20807378	-1.86311	0.235389	-2.0527	0.659055		ENSGALG00000000528	DBNDD1	dysbindin_(dystrobrevin_binding_protein_1)_domain_containing_1	5hrs	DOWN
chr11:1487545-1488113	-2.44807	0.14498	-2.42467	0.732645		-	-	-	5hrs	DOWN
chr11:1489459-1489941	-1.68908	0.25189	-1.66567	0.764076		-	-	-	5hrs	DOWN
chr11:6962664-6963318	-2.13548	0.0854045	-2.15788	0.466636		-	-	-	5hrs	DOWN
chr11:11722914-11723294	-2.31057	0.17236	-1.7022	0.810367		-	-	-	5hrs	DOWN
chr11:17157139-17157683	-1.98864	0.201543	-1.96523	0.750708		-	-	-	5hrs	DOWN
chr11:18201542-18202154	-2.31057	0.17236	-2.28716	0.764468		-	-	-	5hrs	DOWN
chr11:21545809-21546650	-2.5736	0.0862496	-2.5502	0.588959		ENSGALG00000000713	ZFHX3	zinc_finger_homeobox_3	5hrs	DOWN
chr11:21547459-21547919	-2.44807	0.14498	-2.42467	0.732645		-	-	-	5hrs	DOWN
chr11:21549758-21550192	-1.72561	0.276151	-1.7022	0.810367		-	-	-	5hrs	DOWN
chr12:14671219-14690776	-3.31057	0.0827423	-2.38027	0.639824		ENSGALG00000007467	SLC25A26	solute_carrier_family_25,_member_26	5hrs	DOWN
chr12:6939380-6971984	-1.56211	0.063805	-1.58729	0.117201		-	-	-	5hrs	DOWN
chr12:10796440-10806636	-2.54946	0.184559	-2.96523	0.191011		-	-	-	5hrs	DOWN
chr12:11649919-11653826	-1.89553	0.191885	-2.0527	0.659055		ENSGALG00000006544	SRPK3	SRSF_protein_kinase_3	5hrs	DOWN
chr12:11808177-11810163	-1.72561	0.190641	-1.7022	0.561541		-	-	-	5hrs	DOWN
chr12:14038248-14040964	-2.49114	0.0984291	-3.08071	0.416486		ENSGALG00000007332/ENSGALG00000007392	PRICKLE2/ADAMTS9	prickle_homolog_2_(Drosophila)/ADAM_metallopeptidase_with_thrombospondin_type_1_motif,_9	5hrs	DOWN
chr12:14058136-14060414	-2.21103	0.0583869	-2.28716	0.31228		-	-	-	5hrs	DOWN
chr12:14081812-14096161	-2.38276	0.06514	-2.18155	0.204159		-	-	-	5hrs	DOWN
chr12:15714003-15715341	-1.79599	0.219533	-1.80174	0.59285		-	-	-	5hrs	DOWN
chr12:2827429-2827963	-2.31057	0.17236	-2.28716	0.764468		ENSGALG00000004018	GLYCTK	glycerate_kinase	5hrs	DOWN
chr12:11807721-11808105	-3.44807	0.0689941	-3.42467	0.670048		ENSGALG00000006776	KLHDC8B	kelch_domain_containing_8B	5hrs	DOWN
chr12:14050775-14051514	-3.5736	0.058031	-3.5502	0.636853		-	-	-	5hrs	DOWN
chr12:14755751-14756365	-1.6516	0.212698	-1.6282	0.687133		-	-	-	5hrs	DOWN
chr12:14934480-14934751	-3.44807	0.0689941	-2.42467	0.732645		-	-	-	5hrs	DOWN
chr12:15709573-15710011	-1.86311	0.235389	-1.8397	0.780215		ENSGALG00000013408	TMF1	TATA_element_modulatory_factor_1	5hrs	DOWN
chr13:7493186-7496836	-2.0761	0.147872	-2.02413	0.558771		ENSGALG00000001662	ATP10B	ATPase,_class_V,_type_10B	5hrs	DOWN
chr13:7506345-7510416	-2.21103	0.14956	-2.5502	0.588959		ENSGALG00000001662	ATP10B	ATPase,_class_V,_type_10B	5hrs	DOWN
chr13:10418655-10421303	-1.86311	0.235389	-1.5502	0.791927		-	SNCB	synuclein,_beta	5hrs	DOWN
chr13:1548179-1548874	-2.79599	0.0894179	-2.77259	0.518543		ENSGALG00000001113	APBB3	Amyloid_beta_(A4)_precursor_protein-binding,_family_B,_member_3	5hrs	DOWN
chr13:11592079-11784524	-1.98864	0.125284	-2.21316	0.406189		ENSGALG00000003886	SGCD	sarcoglycan,_delta_(35kDa_dystrophin-associated_glycoprotein)	5hrs	DOWN
chr13:13376765-13378100	-1.79599	0.219533	-2.13516	0.634461		ENSGALG00000005802	FLT4	fms-related_tyrosine_kinase_4	5hrs	DOWN
chr13:11360922-11361441	-1.72561	0.276151	-1.7022	0.810367		ENSGALG00000003714	LSM11	LSM11,_U7_small_nuclear_RNA_associated	5hrs	DOWN
chr13:11589106-11590068	-2.21103	0.14956	-2.18763	0.693783		-	-	-	5hrs	DOWN
chr13:13474377-13475059	-1.72561	0.276151	-1.8397	0.780215		ENSGALG00000005802	FLT4	fms-related_tyrosine_kinase_4	5hrs	DOWN
chr13:13475495-13475796	-2.10412	0.17327	-2.08071	0.721887		ENSGALG00000005802	FLT4	fms-related_tyrosine_kinase_4	5hrs	DOWN
chr14:663919-669094	-1.79599	0.219533	-1.5502	0.67604		ENSGALG00000002981	ERCC4	excision_repair_cross-complementing_rodent_repair_deficiency,_complementation_group_4	5hrs	DOWN
chr14:6972642-6975656	-2.5736	0.122722	-2.77259	0.518543		ENSGALG00000006140	GGA2	Golgi_associated,_gamma_adaptin_ear_containing,_ARF_binding_protein_2	5hrs	DOWN
chr14:8864967-8878577	-1.67046	0.0995667	-1.80545	0.189217		ENSGALG00000006982	EEF2K	eukaryotic_elongation_factor-2_kinase	5hrs	DOWN
chr14:9077104-9110088	-2.15856	0.206437	-3.42467	0.441737		ENSGALG00000007149	CYTH3	cytohesin_3	5hrs	DOWN
chr14:14266810-14278670	-1.86311	0.235389	-1.5502	0.791927		ENSGALG00000001985	PIGQ	phosphatidylinositol_glycan_anchor_biosynthesis,_class_Q	5hrs	DOWN
chr14:2624530-2625867	-1.70485	0.178609	-1.74284	0.612878		-	-	-	5hrs	DOWN
chr14:2627276-2628952	-3.44807	0.0689941	-3.21316	0.509902		ENSGALG00000004199	TMEM184A	transmembrane_protein_184A	5hrs	DOWN
chr14:4957210-4959118	-2.44807	0.14498	-1.73077	0.698575		-	TOM1L2	target_of_myb1-like_2_(chicken)	5hrs	DOWN
chr14:6039416-6040585	-3.31057	0.0827423	-2.28716	0.666423		-	-	-	5hrs	DOWN
chr14:6547744-6548929	-2.44807	0.14498	-2.5502	0.701624		-	ZDHHC4	zinc_finger,_DHHC-type_containing_4	5hrs	DOWN
chr14:13365667-13385943	-2.21103	0.14956	-3.42467	0.670048		-	SRL	sarcalumenin	5hrs	DOWN
chr14:15637587-15639092	-1.54794	0.273733	-1.74284	0.612878		-	EXOD1	exonuclease_domain_containing_1	5hrs	DOWN
chr14:1983170-1984063	-1.6767	0.159374	-1.74951	0.544166		-	-	-	5hrs	DOWN
chr14:2016855-2017203	-2.31057	0.17236	-2.28716	0.764468		-	-	-	5hrs	DOWN
chr14:3100615-3100986	-2.10412	0.17327	-2.08071	0.721887		-	-	-	5hrs	DOWN
chr14:3101445-3101882	-2.44807	0.14498	-1.96523	0.750708		-	-	-	5hrs	DOWN
chr14:3898719-3899781	-1.93617	0.121901	-1.91277	0.554317		-	-	-	5hrs	DOWN
chr14:3900036-3901420	-1.82994	0.0979785	-1.80654	0.442178		-	-	-	5hrs	DOWN
chr14:5018486-5018716	-2.98864	0.0665122	-2.38027	0.639824		ENSGALG00000004929	C17orf39	chromosome_17_open_reading_frame_39	5hrs	DOWN
chr14:6794254-6794576	-1.5736	0.167674	-1.6877	0.53878		-	-	-	5hrs	DOWN
chr14:7010876-7011188	-1.72561	0.146693	-1.87213	0.531701		-	SCNN1B	Sodium_channel,_nonvoltage-gated_1,_beta_(Liddle_syndrome)	5hrs	DOWN
chr14:8316603-8317212	-1.79599	0.30396	-2.21316	0.610546		-	-	-	5hrs	DOWN
chr15:5270868-5274784	-3.15856	0.0504137	-3.60909	0.38152		ENSGALG00000003736	ABCB9	ATP-binding_cassette,_sub-family_B_(MDR/TAP),_member_9	5hrs	DOWN
chr15:8387311-8391548	-3.44807	0.0689941	-2.87213	0.613849		ENSGALG00000006363	CABIN1	calcineurin_binding_protein_1	5hrs	DOWN
chr15:10263831-10266480	-3.0761	0.0577766	-3.02413	0.435419		-	-	-	5hrs	DOWN
chr15:3833920-3835044	-2.44807	0.0809745	-2.10274	0.583604		-	-	-	5hrs	DOWN
chr15:9434140-9434657	-2.31057	0.17236	-2.28716	0.764468		-	-	-	5hrs	DOWN
chr15:9765902-9766519	-3.44807	0.0689941	-3.42467	0.670048		-	-	-	5hrs	DOWN
chr15:10299752-10300437	-1.98864	0.201543	-1.96523	0.750708		ENSGALG00000007698	CARD8	caspase_recruitment_domain_family,_member_8	5hrs	DOWN
chr17:1302426-1308025	-1.54118	0.145238	-1.94613	0.25879		-	NOXA1	NADPH_oxidase_activator_1	5hrs	DOWN
chr17:6701106-6711723	-1.6291	0.178842	-1.82322	0.0979784		ENSGALG00000003840	C9orf58	chromosome_9_open_reading_frame_58	5hrs	DOWN
chr17:8031765-8033996	-2.31057	0.17236	-2.77259	0.642194		ENSGALG00000002626	RXRA	retinoid_X_receptor,_alpha	5hrs	DOWN
chr17:8423702-8426360	-2.10412	0.17327	-2.60909	0.481307		-	AGPAT2	1-acylglycerol-3-phosphate_O-acyltransferase_2_(lysophosphatidic_acid_acyltransferase,_beta)	5hrs	DOWN
chr17:8522506-8523503	-2.21103	0.14956	-2.87213	0.613849		ENSGALG00000002375	NOTCH1	Notch_homolog_1,_translocation-associated_(Drosophila)	5hrs	DOWN
chr17:5815961-5820003	-2.5736	0.122722	-2.13516	0.634461		ENSGALG00000004702	WDR34	WD_repeat_domain_34	5hrs	DOWN
chr17:5957683-5959134	-1.68908	0.25189	-1.77259	0.736847		ENSGALG00000004556	DOLK	dolichol_kinase	5hrs	DOWN
chr17:798957-799718	-1.79599	0.219533	-1.64331	0.723389		-	LOC417293	similar_to_MGC84171_protein	5hrs	DOWN
chr17:1361689-1362556	-2.15856	0.0933614	-2.13516	0.520388		-	-	-	5hrs	DOWN
chr17:1452429-1452868	-3.31057	0.0827423	-3.28716	0.704402		ENSGALG00000008886	ZNF618	zinc_finger_protein_618	5hrs	DOWN
chr17:3664079-3802514	-2.31057	0.586325	-2.28716	0.764468		ENSGALG00000007038	ASTN2	astrotactin_2	5hrs	DOWN
chr17:10300513-10301426	-1.64072	0.197338	-1.61731	0.65447		-	-	-	5hrs	DOWN
chr17:10348263-10349346	-2.36715	0.0755852	-2.45066	0.465549		ENSGALG00000000993	GAPVD1	GTPase_activating_protein_and_VPS9_domains_1	5hrs	DOWN
chr17:10984016-10984773	-1.83664	0.181314	-1.81323	0.674364		ENSGALG00000023407	ZBTB34	zinc_finger_and_BTB_domain_containing_34	5hrs	DOWN
chr18:2155187-2156416	-1.79599	0.219533	-1.80174	0.59285		-	-	-	5hrs	DOWN
chr18:9290877-9292557	-2.86311	0.0526043	-2.60909	0.481307		ENSGALG00000006901	AATK	apoptosis-associated_tyrosine_kinase	5hrs	DOWN
chr18:9763758-9764862	-1.91464	0.16126	-1.5502	0.590054		ENSGALG00000007106	DNAH17	dynein,_axonemal,_heavy_chain_17	5hrs	DOWN
chr18:9765129-9766788	-2.08818	0.093145	-1.89812	0.431193		ENSGALG00000007106	DNAH17	dynein,_axonemal,_heavy_chain_17	5hrs	DOWN
chr18:4772916-4800467	-1.98864	0.332082	-1.96523	0.627764		ENSGALG00000002424	RECQL5	RecQ_protein-like_5	5hrs	DOWN
chr18:6288060-6291329	-1.5736	0.325655	-2.5502	0.588959		ENSGALG00000003131	DGKE	diacylglycerol_kinase,_epsilon_64kDa	5hrs	DOWN
chr18:3491547-3525912	-3.79599	0.482009	-3.77259	0.574112		ENSGALG00000001618	C17ORF101	Uncharacterized_protein	5hrs	DOWN
chr18:4626233-4626574	-2.31057	0.17236	-2.28716	0.764468		-	-	-	5hrs	DOWN
chr18:4959196-4959494	-2.5736	0.122722	-2.5502	0.701624		-	-	-	5hrs	DOWN
chr18:7741885-7742277	-3.31057	0.0827423	-2.28716	0.764468		ENSGALG00000004060	RGS9	regulator_of_G-protein_signaling_9	5hrs	DOWN
chr18:8189178-8192014	-1.58855	0.0710471	-1.52075	0.286983		ENSGALG00000004373	KCNJ16	potassium_inwardly-rectifying_channel,_subfamily_J,_member_16	5hrs	DOWN
chr18:8192217-8192622	-1.68908	0.25189	-1.66567	0.764076		-	-	-	5hrs	DOWN
chr19:4067026-4071541	-2.5122	0.0723666	-2.28716	0.419718		ENSGALG00000021636	LOC771160	similar_to_CASP_gene_product	5hrs	DOWN
chr19:5039801-5081567	-3.44807	0.0689941	-3.21316	0.509902		ENSGALG00000002631	FAM211A	family_with_sequence_similarity_211,_member_A	5hrs	DOWN
chr19:6595421-6599555	-1.79599	0.219533	-1.89123	0.650759		ENSGALG00000004637	SHPK	sedoheptulokinase	5hrs	DOWN
chr19:7058264-7110105	-3.31057	0.0827423	-2.77259	0.642194		ENSGALG00000005061	PPM1E	protein_phosphatase_1E_(PP2C_domain_containing)	5hrs	DOWN
chr19:9143097-9148774	-2.42335	0.0517844	-2.45709	0.135553		ENSGALG00000005685	KSR1	kinase_suppressor_of_ras_1	5hrs	DOWN
chr19:4117087-4118387	-1.98864	0.201543	-1.66567	0.764076		-	ALKBH4	alkB,_alkylation_repair_homolog_4_(E._coli)	5hrs	DOWN
chr19:6027930-6029826	-1.68908	0.25189	-1.87213	0.710258		-	-	-	5hrs	DOWN
chr19:564668-565487	-1.68908	0.25189	-1.66567	0.764076		-	-	-	5hrs	DOWN
chr19:5100008-5100937	-2.21103	0.0849721	-2.28716	0.466811		-	-	-	5hrs	DOWN
chr19:5247871-5248153	-1.98864	0.201543	-1.5502	0.791927		-	-	-	5hrs	DOWN
chr19:6969655-6970384	-2.31057	0.17236	-2.28716	0.764468		ENSGALG00000004917	DOC2B	double_C2-like_domains,_beta	5hrs	DOWN
chr19:7111834-7112595	-1.83664	0.181314	-1.81323	0.674364		ENSGALG00000005061	PPM1E	protein_phosphatase_1E_(PP2C_domain_containing)	5hrs	DOWN
chr19:8712610-8713576	-2.21103	0.14956	-2.18763	0.693783		ENSGALG00000005555	-	-	5hrs	DOWN
chr19:9149446-9159104	-2.79599	0.433086	-2.77259	0.642194		ENSGALG00000005685	KSR1	kinase_suppressor_of_ras_1	5hrs	DOWN
chr19:9907704-9908307	-3.44807	0.0689941	-3.42467	0.670048		ENSGALG00000006069	SMTNL2	smoothelin-like_2	5hrs	DOWN
chr2:377305-378047	-1.75417	0.204318	-1.81323	0.674364		ENSGALG00000019713	ZNF8	zinc_finger_protein_8	5hrs	DOWN
chr2:3780788-3781397	-2.6516	0.0758425	-2.5502	0.501172		ENSGALG00000005492	NBEAL2	neurobeachin-like_2	5hrs	DOWN
chr2:6149218-6151816	-1.95211	0.0896085	-1.90383	0.403867		ENSGALG00000006181	NUB1	negative_regulator_of_ubiquitin-like_proteins_1	5hrs	DOWN
chr2:9502416-9514800	-2.16798	0.092866	-2.28716	0.170527		ENSGALG00000006558	WDR60	WD_repeat_domain_60	5hrs	DOWN
chr2:9515361-9523451	-2.21103	0.0583869	-2.28716	0.200903		ENSGALG00000006558	WDR60	WD_repeat_domain_60	5hrs	DOWN
chr2:32150648-32184070	-2.06664	0.0783394	-1.93207	0.418019		ENSGALG00000011046	SNX10	sorting_nexin_10	5hrs	DOWN
chr2:41246154-41251729	-1.67314	0.118128	-1.9863	0.273496		-	C7orf24	chromosome_7_open_reading_frame_24	5hrs	DOWN
chr2:44650800-44654440	-1.86311	0.235389	-1.6282	0.687133		ENSGALG00000011975	FBXL2	F-box_and_leucine-rich_repeat_protein_2	5hrs	DOWN
chr2:45540276-45583374	-1.72561	0.315134	-2.18763	0.693783		ENSGALG00000012046	ARPP21	cAMP-regulated_phosphoprotein,_21kDa	5hrs	DOWN
chr2:51786796-51885064	-1.72239	0.252666	-1.64876	0.0944762		ENSGALG00000012353	-	-	5hrs	DOWN
chr2:56857038-56883985	-2.98864	0.0665122	-3.0527	0.559983		ENSGALG00000012517	SLC9A3	solute_carrier_family_9_(sodium/hydrogen_exchanger),_member_3	5hrs	DOWN
chr2:56913396-56920323	-1.71656	0.096196	-1.64804	0.378556		ENSGALG00000012517	SLC9A3	solute_carrier_family_9_(sodium/hydrogen_exchanger),_member_3	5hrs	DOWN
chr2:77989688-78092623	-2.3839	0.0991425	-2.85832	0.223101		ENSGALG00000012964	ANKH	ankylosis,_progressive_homolog_(mouse)	5hrs	DOWN
chr2:80942019-80947954	-1.5736	0.237723	-1.80174	0.59285		ENSGALG00000013051	SEMA5A	sema_domain,_seven_thrombospondin_repeats_(type_1_and_type_1-like),_transmembrane_domain_(TM)_and_short_cytoplasmic_domain,_(semaphorin)_5A	5hrs	DOWN
chr2:105796445-105809517	-2.49114	0.0984291	-2.77259	0.425581		ENSGALG00000014976	GATA6	GATA_binding_protein_6	5hrs	DOWN
chr2:123001111-123007873	-1.948	0.0984375	-1.93924	0.345734		ENSGALG00000015658	GDAP1	ganglioside-induced_differentiation-associated_protein_1	5hrs	DOWN
chr2:132332095-132341733	-1.75417	0.204318	-1.96523	0.57878		ENSGALG00000014523	MATN2	matrilin_2	5hrs	DOWN
chr2:132430926-132433391	-2.21103	0.14956	-2.28716	0.587314		-	LOC425567	Similar_to_Ribonucleases_P/MRP_protein_subunit_POP1_(hPOP1)	5hrs	DOWN
chr2:133206580-133208769	-1.86311	0.235389	-2.08071	0.721887		ENSGALG00000016029	VPS13B	vacuolar_protein_sorting_13_homolog_B_(yeast)	5hrs	DOWN
chr2:143000056-143021272	-3.31057	0.0827423	-3.5502	0.636853		ENSGALG00000016393	LOC420352	hypothetical_LOC420352	5hrs	DOWN
chr2:151658111-151660907	-1.89553	0.191885	-1.77259	0.642122		-	DENND3	DENN/MADD_domain_containing_3	5hrs	DOWN
chr2:30747-32607	-2.0761	0.147872	-1.6282	0.687133		-	-	-	5hrs	DOWN
chr2:280619-281600	-2.76123	0.0930824	-3.37123	0.166732		-	-	-	5hrs	DOWN
chr2:438895-440500	-1.66671	0.230747	-1.89123	0.650759		ENSGALG00000004819	ZNF767	zinc_finger_family_member_767	5hrs	DOWN
chr2:6596907-6672365	-2.25167	0.0927805	-2.00476	0.448755		-	-	-	5hrs	DOWN
chr2:14592872-14628110	-1.58501	0.0597601	-1.69957	0.10939		ENSGALG00000007331	SVIL	supervillin	5hrs	DOWN
chr2:20951555-20955379	-2.79599	0.0894179	-4.21316	0.438849		ENSGALG00000008997	STEAP4	STEAP_family_member_4	5hrs	DOWN
chr2:22584677-22589717	-3.15856	0.0504137	-3.0527	0.330458		ENSGALG00000023244	LOC420552	hypothetical_gene_supported_by_BX929555;_BX929904	5hrs	DOWN
chr2:41206092-41207267	-2.98864	0.0665122	-4.42467	0.371728		ENSGALG00000011527	ENTPD3	ectonucleoside_triphosphate_diphosphohydrolase_3	5hrs	DOWN
chr2:44394873-44396478	-3.31057	0.0827423	-3.66567	0.604865		ENSGALG00000011952	SLC25A38	solute_carrier_family_25,_member_38	5hrs	DOWN
chr2:60840949-60843459	-1.73305	0.166763	-1.89485	0.251823		-	-	-	5hrs	DOWN
chr2:68854259-68863717	-1.5736	0.188777	-1.6877	0.53878		ENSGALG00000012866	SERPINB6	serpin_peptidase_inhibitor,_clade_B_(ovalbumin),_member_6	5hrs	DOWN
chr2:84848982-84851131	-2.31057	0.17236	-2.5502	0.701624		-	-	-	5hrs	DOWN
chr2:86915633-86921353	-3.31057	0.0827423	-2.96523	0.586442		-	PTPN3	protein_tyrosine_phosphatase,_non-receptor_type_3	5hrs	DOWN
chr2:92953770-92954334	-2.31057	0.17236	-2.66567	0.671461		ENSGALG00000013657	ZNF236	Zinc_finger_protein_236	5hrs	DOWN
chr2:110834512-110868887	-1.58345	0.306131	-1.60909	0.442173		-	-	-	5hrs	DOWN
chr2:120866688-120873698	-2.15856	0.0726842	-2.5502	0.285313		-	SLCO5A1	Solute_carrier_organic_anion_transporter_family,_member_5A1	5hrs	DOWN
chr2:122916340-122984542	-1.5736	0.188777	-1.5058	0.582628		ENSGALG00000015653	JPH1	junctophilin_1	5hrs	DOWN
chr2:125814149-125822997	-2.5736	0.122722	-2.96523	0.586442		ENSGALG00000015755	ZNF704	Zinc_finger_protein_704	5hrs	DOWN
chr2:133977788-133978970	-1.76625	0.161907	-1.5502	0.590054		-	-	-	5hrs	DOWN
chr2:141523325-141675396	-2.0761	0.147872	-2.28716	0.419718		ENSGALG00000016115	SAMD12	sterile_alpha_motif_domain_containing_12	5hrs	DOWN
chr2:152635749-152896351	-2.0761	0.147872	-2.21316	0.406189		ENSGALG00000016161	TSNARE1	t-SNARE_domain_containing_1	5hrs	DOWN
chr2:5168910-5170272	-1.91464	0.0963816	-1.89123	0.461285		-	-	-	5hrs	DOWN
chr2:8736078-8737837	-1.72561	0.120156	-1.7022	0.483446		-	-	-	5hrs	DOWN
chr2:14901637-14902268	-3.31057	0.0827423	-3.28716	0.704402		-	-	-	5hrs	DOWN
chr2:15759169-15759695	-3.31057	0.0827423	-3.28716	0.704402		-	-	-	5hrs	DOWN
chr2:21305002-21305998	-2.44807	0.0809745	-2.42467	0.542894		ENSGALG00000009004	ZNF804B	zinc_finger_protein_804B	5hrs	DOWN
chr2:21597805-21598165	-2.31057	0.17236	-2.28716	0.764468		ENSGALG00000009006	STEAP1	six_transmembrane_epithelial_antigen_of_the_prostate_1	5hrs	DOWN
chr2:21598218-21598606	-2.5736	0.122722	-2.5502	0.701624		ENSGALG00000009006	STEAP1	six_transmembrane_epithelial_antigen_of_the_prostate_1	5hrs	DOWN
chr2:21599059-21600479	-2.26875	0.0663502	-2.0527	0.465479		ENSGALG00000009006	STEAP1	six_transmembrane_epithelial_antigen_of_the_prostate_1	5hrs	DOWN
chr2:26574558-26575079	-2.44807	0.14498	-1.8397	0.780215		-	-	-	5hrs	DOWN
chr2:31574223-31575678	-2.19027	0.10317	-1.90383	0.59934		-	-	-	5hrs	DOWN
chr2:32325331-32325780	-1.79599	0.219533	-1.77259	0.736847		ENSGALG00000011051	SKAP2	src_kinase_associated_phosphoprotein_2	5hrs	DOWN
chr2:38827891-38828720	-1.98864	0.168205	-2.0527	0.659055		-	-	-	5hrs	DOWN
chr2:42891643-42892260	-1.54118	0.145238	-1.61731	0.475256		-	-	-	5hrs	DOWN
chr2:44390260-44390884	-1.79599	0.219533	-1.77259	0.736847		-	-	-	5hrs	DOWN
chr2:44392951-44393766	-2.31057	0.102187	-1.96523	0.627764		ENSGALG00000011952	SLC25A38	solute_carrier_family_25,_member_38	5hrs	DOWN
chr2:49009991-49010604	-1.98864	0.168205	-2.0527	0.659055		-	GOLGA4	golgi_autoantigen,_golgin_subfamily_a,_4	5hrs	DOWN
chr2:51786796-51885064	-2.15856	0.368161	-2.16687	0.356555		ENSGALG00000012353	-	-	5hrs	DOWN
chr2:54243622-54244040	-3.31057	0.0827423	-3.28716	0.704402		-	-	-	5hrs	DOWN
chr2:55290937-55291453	-1.68908	0.25189	-1.66567	0.764076		-	-	-	5hrs	DOWN
chr2:55296660-55297154	-2.44807	0.14498	-2.42467	0.732645		-	-	-	5hrs	DOWN
chr2:56711833-56712350	-1.5736	0.289847	-1.5502	0.791927		-	-	-	5hrs	DOWN
chr2:61622799-61623189	-1.72561	0.276151	-1.7022	0.810367		ENSGALG00000012689	KIF13A	kinesin_family_member_13A	5hrs	DOWN
chr2:64404457-64404922	-3.5736	0.058031	-3.5502	0.636853		-	LOC428479	similar_to_MGC82474_protein	5hrs	DOWN
chr2:64461112-64461582	-2.31057	0.17236	-2.28716	0.764468		-	-	-	5hrs	DOWN
chr2:70286040-70286536	-2.68908	0.104472	-1.7022	0.561541		-	-	-	5hrs	DOWN
chr2:77426581-77428168	-1.66671	0.151582	-1.64331	0.555464		ENSGALG00000012960	LOC777533	hypothetical_protein_LOC777533	5hrs	DOWN
chr2:78451095-78451594	-3.31057	0.0827423	-3.28716	0.704402		-	-	-	5hrs	DOWN
chr2:101673765-102254823	-3.98864	0.606317	-3.96523	0.516341		ENSGALG00000013902	PTPRM	protein_tyrosine_phosphatase,_receptor_type,_M	5hrs	DOWN
chr2:105562255-105563144	-1.91464	0.0963816	-1.89123	0.461285		-	-	-	5hrs	DOWN
chr2:110832806-110833619	-2.23657	0.115261	-2.21316	0.610546		-	-	-	5hrs	DOWN
chr2:113318587-113318755	-1.98864	0.24932	-1.8397	0.620453		-	-	-	5hrs	DOWN
chr2:120863581-120864792	-2.44807	0.14498	-2.21316	0.610546		-	-	-	5hrs	DOWN
chr2:122906238-122907424	-2.22568	0.072086	-2.20227	0.450536		-	-	-	5hrs	DOWN
chr2:123008911-123009426	-2.25167	0.0927805	-2.22827	0.541874		-	-	-	5hrs	DOWN
chr2:133984066-133985004	-3.44807	0.0689941	-4.28716	0.415367		-	-	-	5hrs	DOWN
chr2:133987707-133988257	-2.98864	0.0665122	-2.38027	0.639824		-	-	-	5hrs	DOWN
chr2:138884189-138884841	-2.10412	0.17327	-1.73077	0.522497		-	-	-	5hrs	DOWN
chr2:140259555-140260518	-2.10412	0.17327	-1.66567	0.764076		-	-	-	5hrs	DOWN
chr2:141517286-141519198	-1.8068	0.0651614	-1.7834	0.32242		-	-	-	5hrs	DOWN
chr2:144934470-144934738	-3.15856	0.100264	-3.42467	0.670048		-	-	-	5hrs	DOWN
chr2:144934852-144935814	-2.05903	0.128416	-2.03562	0.605379		-	-	-	5hrs	DOWN
chr2:145493127-145493470	-2.31057	0.17236	-2.28716	0.764468		-	-	-	5hrs	DOWN
chr2:150642867-150643481	-3.44807	0.0689941	-3.42467	0.670048		-	-	-	5hrs	DOWN
chr2:150644024-150644611	-3.44807	0.0689941	-3.42467	0.670048		-	-	-	5hrs	DOWN
chr2:150644798-150645336	-3.5736	0.058031	-3.5502	0.636853		-	-	-	5hrs	DOWN
chr2:150645806-150646208	-2.44807	0.14498	-2.42467	0.732645		-	-	-	5hrs	DOWN
chr2:151671023-151671443	-1.72561	0.276151	-1.7022	0.810367		-	DENND3	DENN/MADD_domain_containing_3	5hrs	DOWN
chr20:1112662-1122771	-1.77123	0.123548	-1.85106	0.244918		-	FER1L4	fer-1-like_4_(C._elegans)	5hrs	DOWN
chr20:1125281-1130851	-1.98864	0.26585	-1.5502	0.67604		-	FER1L4	fer-1-like_4_(C._elegans)	5hrs	DOWN
chr20:7212912-7627205	-1.91464	0.0963816	-2.33869	0.266495		ENSGALG00000005102	CDH4	cadherin_4,_type_1,_R-cadherin_(retinal)	5hrs	DOWN
chr20:13578623-13585126	-1.97814	0.179261	-2.08071	0.420187		-	C20orf175	chromosome_20_open_reading_frame_175	5hrs	DOWN
chr20:13586432-13589193	-1.72561	0.276151	-1.87213	0.710258		ENSGALG00000008005	FAM65C	family_with_sequence_similarity_65,_member_C	5hrs	DOWN
chr20:659997-661429	-2.31057	0.17236	-2.38027	0.639824		-	-	-	5hrs	DOWN
chr20:10492171-10495427	-1.64575	0.131799	-2.03562	0.213184		ENSGALG00000006894	PLTP	phospholipid_transfer_protein	5hrs	DOWN
chr20:28521-29287	-1.79599	0.219533	-1.77259	0.736847		ENSGALG00000014003	ZNF532	zinc_finger_protein_532	5hrs	DOWN
chr20:527520-528064	-2.44807	0.14498	-2.42467	0.732645		-	-	-	5hrs	DOWN
chr20:1125281-1130851	-1.83664	0.256767	-1.5502	0.710475		-	FER1L4	fer-1-like_4_(C._elegans)	5hrs	DOWN
chr20:3802706-3803970	-1.79599	0.120442	-1.63509	0.533305		-	-	-	5hrs	DOWN
chr20:4925493-4926237	-1.79599	0.171179	-1.77259	0.642122		-	-	-	5hrs	DOWN
chr20:4926297-4927357	-1.98864	0.100246	-1.96523	0.497699		-	-	-	5hrs	DOWN
chr20:8717662-8718357	-2.44807	0.14498	-2.42467	0.732645		ENSGALG00000005762	BIRC7	baculoviral_IAP_repeat-containing_7_(livin)	5hrs	DOWN
chr20:9592858-9594226	-1.75916	0.0823746	-1.73575	0.372691		-	-	-	5hrs	DOWN
chr20:9594579-9595264	-2.89553	0.0769295	-2.87213	0.613849		-	-	-	5hrs	DOWN
chr20:9873070-9873462	-1.72561	0.276151	-1.7022	0.810367		-	-	-	5hrs	DOWN
chr20:11575436-11576138	-2.6325	0.0582632	-2.60909	0.481307		-	RBM38	RNA_binding_motif_protein_38	5hrs	DOWN
chr20:11576188-11576645	-2.98864	0.0665122	-3.0527	0.559983		-	RBM38	RNA_binding_motif_protein_38	5hrs	DOWN
chr20:11620517-11620798	-3.5736	0.058031	-3.5502	0.636853		-	-	-	5hrs	DOWN
chr20:11622082-11622545	-2.31057	0.17236	-2.28716	0.764468		-	-	-	5hrs	DOWN
chr20:13507120-13507687	-1.86311	0.235389	-1.8397	0.780215		-	-	-	5hrs	DOWN
chr21:2299305-2308079	-2.35599	0.0873624	-2.46	0.225456		ENSGALG00000001600	DVL1	dishevelled,_dsh_homolog_1_(Drosophila)	5hrs	DOWN
chr21:3570311-3572970	-1.86311	0.235389	-1.73077	0.698575		-	-	-	5hrs	DOWN
chr21:3695852-3697940	-2.68908	0.104472	-2.7022	0.541233		ENSGALG00000002726	KIF1B	kinesin_family_member_1B	5hrs	DOWN
chr21:4322587-4323138	-3.31057	0.0827423	-2.6282	0.564703		ENSGALG00000003713	CLCNKB	chloride_channel_Kb	5hrs	DOWN
chr21:108746-109197	-2.31057	0.129601	-1.8397	0.620453		ENSGALG00000000449	ARHGEF10L	Rho_guanine_nucleotide_exchange_factor_(GEF)_10-like	5hrs	DOWN
chr21:2847107-2851676	-2.5736	0.122722	-2.6282	0.564703		ENSGALG00000002121	PLEKHN1	pleckstrin_homology_domain_containing,_family_N_member_1	5hrs	DOWN
chr21:4905966-4906540	-2.15856	0.206437	-2.38027	0.639824		ENSGALG00000014176	PLA2G2E	Phospholipase_A2,_group_IIE	5hrs	DOWN
chr21:2311549-2312015	-3.31057	0.0827423	-3.28716	0.704402		ENSGALG00000001600	DVL1	dishevelled,_dsh_homolog_1_(Drosophila)	5hrs	DOWN
chr21:2429702-2430241	-3.31057	0.0827423	-3.28716	0.704402		-	-	-	5hrs	DOWN
chr21:2838052-2838527	-2.10412	0.17327	-2.08071	0.721887		-	-	-	5hrs	DOWN
chr22:2663265-2666823	-2.21103	0.0849721	-1.96523	0.463631		-	-	-	5hrs	DOWN
chr22:2669785-2671149	-2.5736	0.0648412	-1.63509	0.533305		ENSGALG00000003594	ANK1	ankyrin_1,_erythrocytic	5hrs	DOWN
chr22:2671886-2673707	-2.04753	0.113353	-1.67573	0.517623		ENSGALG00000003594	ANK1	ankyrin_1,_erythrocytic	5hrs	DOWN
chr22:2675376-2677725	-2.98864	0.0665122	-1.96523	0.57878		ENSGALG00000003594	ANK1	ankyrin_1,_erythrocytic	5hrs	DOWN
chr22:2255949-2267871	-2.40368	0.522194	-1.96523	0.684323		-	-	-	5hrs	DOWN
chr22:2430933-2445442	-2.68908	0.479351	-2.08071	0.721887		ENSGALG00000024103	TACC1	Transforming,_acidic_coiled-coil_containing_protein_1	5hrs	DOWN
chr23:5945846-5949302	-1.65606	0.10397	-1.74951	0.351158		-	LOC419693	hypothetical_gene_supported_by_CR386657	5hrs	DOWN
chr24:4212510-4221567	-1.70225	0.187099	-1.63766	0.430241		-	USP2	ubiquitin_specific_peptidase_2	5hrs	DOWN
chr24:3531035-3537073	-1.94557	0.0521574	-2.09452	0.151555		ENSGALG00000006598	SORL1	sortilin-related_receptor,_L(DLR_class)_A_repeats-containing	5hrs	DOWN
chr24:3537337-3539951	-2.5736	0.0648412	-2.24534	0.434899		ENSGALG00000006598	SORL1	sortilin-related_receptor,_L(DLR_class)_A_repeats-containing	5hrs	DOWN
chr24:3540368-3547886	-2.12075	0.0757387	-1.8397	0.238391		ENSGALG00000006598	SORL1	sortilin-related_receptor,_L(DLR_class)_A_repeats-containing	5hrs	DOWN
chr24:3557396-3559268	-1.86311	0.235389	-2.0527	0.659055		ENSGALG00000006598	SORL1	sortilin-related_receptor,_L(DLR_class)_A_repeats-containing	5hrs	DOWN
chr24:5236962-5238063	-1.51589	0.139575	-1.61433	0.35296		ENSGALG00000007114	APOA1	apolipoprotein_A-I	5hrs	DOWN
chr24:3173157-3173489	-2.31057	0.17236	-2.28716	0.764468		-	LOC777450	Similar_to_similar_to_60_kDa_heat_shock_protein,_mitochondrial_precursor_(Hsp60)_(60_kDa_chaperonin)_(CPN60)_(Heat_shock_protein_60)_(HSP-60)_(Mitochondrial_matrix_protein_P1)_(HSP-65)	5hrs	DOWN
chr24:3527181-3527781	-2.5736	0.0648412	-2.5502	0.501172		-	-	-	5hrs	DOWN
chr25:754669-761376	-1.85114	0.100956	-2.21316	0.286481		ENSGALG00000013348	OTUD7B	OTU_domain_containing_7B	5hrs	DOWN
chr25:1489488-1490740	-1.68908	0.25189	-1.73077	0.698575		ENSGALG00000014635	RUSC1	RUN_and_SH3_domain_containing_1	5hrs	DOWN
chr25:1971742-1978243	-1.85296	0.065307	-1.78081	0.102588		ENSGALG00000000920	CGN	cingulin	5hrs	DOWN
chr25:1365857-1366075	-1.98864	0.201543	-1.96523	0.750708		-	-	-	5hrs	DOWN
chr25:1391223-1391473	-1.72561	0.276151	-1.7022	0.810367		-	-	-	5hrs	DOWN
chr26:318571-320081	-2.98864	0.0665122	-3.35755	0.463549		ENSGALG00000000616	ELF3	E74-like_factor_3_(ets_domain_transcription_factor,_epithelial-specific_)	5hrs	DOWN
chr26:381533-384934	-2.31057	0.102187	-2.5502	0.501172		ENSGALG00000000584	LOC421174	similar_to_protein-tyrosine-phosphatase_(EC_3.1.3.48),_receptor_type_OST	5hrs	DOWN
chr26:387487-390657	-1.90618	0.106406	-2.31887	0.331955		ENSGALG00000000584	LOC421174	similar_to_protein-tyrosine-phosphatase_(EC_3.1.3.48),_receptor_type_OST	5hrs	DOWN
chr26:781426-785062	-2.04753	0.113353	-2.6282	0.345924		-	LAD1	ladinin_1	5hrs	DOWN
chr26:3030369-3031384	-3.0761	0.0577766	-2.5502	0.588959		-	-	-	5hrs	DOWN
chr26:3940021-3951439	-1.55424	0.0578107	-1.72196	0.0946983		ENSGALG00000002615	DEF6	differentially_expressed_in_FDCP_6_homolog_(mouse)	5hrs	DOWN
chr26:4498991-4744364	-1.81644	0.621877	-1.94099	0.325508		ENSGALG00000003182	BAK1	BCL2-antagonist/killer_1	5hrs	DOWN
chr26:33416-34177	-1.95211	0.0896085	-1.92871	0.446937		-	TEAD3	TEA_domain_family_member_3	5hrs	DOWN
chr26:44927-45183	-1.72561	0.276151	-1.7022	0.810367		-	TEAD3	TEA_domain_family_member_3	5hrs	DOWN
chr26:1463758-1464429	-2.31057	0.17236	-1.7022	0.810367		-	SOX13	SRY_(sex_determining_region_Y)-box_13	5hrs	DOWN
chr26:1978128-1978604	-2.68908	0.104472	-2.66567	0.671461		-	-	-	5hrs	DOWN
chr27:1379449-1396781	-2.21103	0.14956	-2.42467	0.542894		ENSGALG00000000674	MYO1D	myosin_ID	5hrs	DOWN
chr27:2455424-2480223	-3.31057	0.0827423	-2.87213	0.613849		ENSGALG00000000478	TANC2	Tetratricopeptide_repeat,_ankyrin_repeat_and_coiled-coil_containing_2	5hrs	DOWN
chr27:2673802-2674327	-1.72561	0.276151	-1.7022	0.810367		-	-	-	5hrs	DOWN
chr28:70401-83849	-2.5736	0.122722	-2.8397	0.496627		ENSGALG00000000307	LASS4	LAG1_homolog,_ceramide_synthase_4	5hrs	DOWN
chr28:965702-966253	-1.98864	0.201543	-2.13516	0.634461		ENSGALG00000000748	TJP3	Tight_junction_protein_3_(zona_occludens_3)	5hrs	DOWN
chr28:1064471-1064682	-1.98864	0.201543	-1.96523	0.750708		-	DAPK3	death-associated_protein_kinase_3	5hrs	DOWN
chr28:3932230-3932655	-1.98864	0.201543	-1.66567	0.764076		-	-	-	5hrs	DOWN
chr28_random:30538-36017	-2.15856	0.206437	-1.77259	0.736847		ENSGALG00000000238	MVP	major_vault_protein	5hrs	DOWN
chr28_random:852-13631	-2.44807	0.609261	-2.42467	0.732645		ENSGALG00000001948	SAFB2	scaffold_attachment_factor_B2	5hrs	DOWN
chr3:5584685-5589682	-3.15856	0.100264	-3.77259	0.574112		ENSGALG00000008732	OTOR	otoraplin	5hrs	DOWN
chr3:36322353-36375629	-1.78073	0.273788	-1.75878	0.398276		-	AKT3	v-akt_murine_thymoma_viral_oncogene_homolog_3_(protein_kinase_B,_gamma)	5hrs	DOWN
chr3:42712627-42720609	-2.40368	0.0819142	-2.61731	0.302213		ENSGALG00000011182	DLL1	delta-like_1_(Drosophila)	5hrs	DOWN
chr3:51953289-51960800	-2.40368	0.112735	-2.13516	0.634461		ENSGALG00000013616	TET3	tet_methylcytosine_dioxygenase_3	5hrs	DOWN
chr3:54683592-54691135	-2.49114	0.0984291	-2.46773	0.614		ENSGALG00000013795	HIVEP2	human_immunodeficiency_virus_type_I_enhancer_binding_protein_2	5hrs	DOWN
chr3:57535929-57538814	-2.31057	0.17236	-2.5502	0.701624		ENSGALG00000013951	AHI1	Abelson_helper_integration_site_1	5hrs	DOWN
chr3:71505286-71531938	-2.39551	0.167115	-2.28716	0.666423		-	POPDC3	popeye_domain_containing_3	5hrs	DOWN
chr3:73367109-73372583	-2.21103	0.14956	-1.96523	0.627764		ENSGALG00000015465	ASCC3	activating_signal_cointegrator_1_complex_subunit_3	5hrs	DOWN
chr3:94385404-94388143	-2.44807	0.14498	-2.28716	0.764468		ENSGALG00000016355	ERICH1	glutamate-rich_1	5hrs	DOWN
chr3:99327993-99330984	-3.44807	0.0689941	-3.42467	0.670048		ENSGALG00000016439	GRHL1	grainyhead-like_1_(Drosophila)	5hrs	DOWN
chr3:107872011-107873520	-2.15856	0.206437	-2.77259	0.642194		-	PTK2B	PTK2B_protein_tyrosine_kinase_2_beta	5hrs	DOWN
chr3:110568474-110575193	-2.89553	0.0769295	-3.87213	0.544605		ENSGALG00000016679	PKHD1	Polycystic_kidney_and_hepatic_disease_1_(autosomal_recessive)	5hrs	DOWN
chr3:11451823-11525994	-1.68908	0.168234	-1.52323	0.446594		-	-	-	5hrs	DOWN
chr3:32186780-32212105	-1.89553	0.191885	-1.92459	0.47891		ENSGALG00000010385	TJAP1	tight_junction_associated_protein_1_(peripheral)	5hrs	DOWN
chr3:34795678-34796796	-1.72561	0.276151	-1.66567	0.764076		ENSGALG00000010612	PRKD3	protein_kinase_D3	5hrs	DOWN
chr3:41876219-41877744	-1.98864	0.143743	-2.06477	0.500252		ENSGALG00000011086	ACTA1	actin,_alpha_1,_skeletal_muscle	5hrs	DOWN
chr3:43939920-43949332	-2.5736	0.0862496	-2.24534	0.434899		ENSGALG00000011299	KIF25	kinesin_family_member_25	5hrs	DOWN
chr3:56328960-56330275	-1.89553	0.191885	-2.0527	0.659055		ENSGALG00000013846	KIAA1244	KIAA1244	5hrs	DOWN
chr3:56351744-56359953	-2.6516	0.0758425	-2.90383	0.475475		ENSGALG00000013846	KIAA1244	KIAA1244	5hrs	DOWN
chr3:70785079-70791312	-3.15856	0.100264	-3.5502	0.636853		ENSGALG00000015345	AIM1	absent_in_melanoma_1	5hrs	DOWN
chr3:79248019-79262551	-2.68908	0.104472	-2.28716	0.666423		ENSGALG00000015823	ZNF292	zinc_finger_protein_292	5hrs	DOWN
chr3:80662881-80674598	-1.62165	0.108889	-1.70599	0.179078		-	DOPEY1	dopey_family_member_1	5hrs	DOWN
chr3:80700925-80713780	-2.03303	0.0923577	-1.77259	0.455599		ENSGALG00000015858	DOPEY1	dopey_family_member_1	5hrs	DOWN
chr3:93705405-93731515	-2.5736	0.122722	-2.87213	0.613849		ENSGALG00000016350	ARHGEF10	Rho_guanine_nucleotide_exchange_factor_(GEF)_10	5hrs	DOWN
chr3:93758364-93772719	-1.79599	0.140817	-2.7022	0.3203		ENSGALG00000016350	ARHGEF10	Rho_guanine_nucleotide_exchange_factor_(GEF)_10	5hrs	DOWN
chr3:93775990-93781224	-3.44807	0.0689941	-4.13516	0.463486		ENSGALG00000016350	ARHGEF10	Rho_guanine_nucleotide_exchange_factor_(GEF)_10	5hrs	DOWN
chr3:418002-418997	-3.5736	0.058031	-3.5502	0.636853		-	-	-	5hrs	DOWN
chr3:16016171-16016412	-2.98864	0.0665122	-2.96523	0.586442		ENSGALG00000008830	BMP2	bone_morphogenetic_protein_2	5hrs	DOWN
chr3:18342648-18343408	-1.79599	0.219533	-1.77259	0.736847		-	EPHX1	epoxide_hydrolase_1,_microsomal_(xenobiotic)	5hrs	DOWN
chr3:19004998-19005640	-1.86311	0.153981	-1.8397	0.620453		-	DISP1	dispatched_homolog_1_(Drosophila)	5hrs	DOWN
chr3:23349193-23349532	-3.44807	0.0689941	-3.42467	0.670048		-	-	-	5hrs	DOWN
chr3:24261447-24261927	-3.31057	0.0827423	-3.28716	0.704402		ENSGALG00000009911	KIAA0240	KIAA0240	5hrs	DOWN
chr3:28585154-28586047	-1.6767	0.159374	-1.65329	0.57935		-	-	-	5hrs	DOWN
chr3:33172227-33172601	-3.31057	0.0827423	-3.28716	0.704402		-	-	-	5hrs	DOWN
chr3:33456389-33456771	-3.31057	0.0827423	-3.28716	0.704402		-	-	-	5hrs	DOWN
chr3:36380590-36381493	-2.6516	0.0758425	-2.6282	0.564703		-	-	-	5hrs	DOWN
chr3:36381661-36382389	-3.0761	0.0577766	-3.0527	0.559983		-	SDCCAG8	Serologically_defined_colon_cancer_antigen_8	5hrs	DOWN
chr3:40011942-40012975	-1.74763	0.108077	-1.72423	0.452424		-	IRF2BP2	interferon_regulatory_factor_2_binding_protein_2	5hrs	DOWN
chr3:40158419-40159073	-2.79599	0.0894179	-2.77259	0.642194		-	-	-	5hrs	DOWN
chr3:42555026-42555545	-3.5736	0.058031	-3.66567	0.604865		-	-	-	5hrs	DOWN
chr3:42555640-42556610	-2.31057	0.0707559	-2.28716	0.466811		-	-	-	5hrs	DOWN
chr3:47783140-47783959	-1.89553	0.191885	-1.64331	0.723389		-	-	-	5hrs	DOWN
chr3:53479231-53588043	-1.86311	0.573967	-1.8397	0.780215		ENSGALG00000013695	ZDHHC14	Zinc_finger,_DHHC-type_containing_14	5hrs	DOWN
chr3:53479231-53588043	-1.76625	0.417245	-1.74284	0.612878		ENSGALG00000013695	ZDHHC14	Zinc_finger,_DHHC-type_containing_14	5hrs	DOWN
chr3:54691811-54692448	-2.31057	0.17236	-2.28716	0.764468		ENSGALG00000013795	HIVEP2	human_immunodeficiency_virus_type_I_enhancer_binding_protein_2	5hrs	DOWN
chr3:56297273-56297987	-2.0761	0.147872	-2.0527	0.659055		-	-	-	5hrs	DOWN
chr3:56324965-56325903	-2.0761	0.147872	-2.0527	0.659055		-	-	-	5hrs	DOWN
chr3:56326344-56327258	-1.66671	0.230747	-1.64331	0.723389		-	-	-	5hrs	DOWN
chr3:56903941-56905257	-1.60531	0.128147	-1.73782	0.179614		-	-	-	5hrs	DOWN
chr3:58485910-58486421	-3.15856	0.100264	-2.21316	0.610546		-	-	-	5hrs	DOWN
chr3:62758796-62759569	-2.15856	0.130368	-2.0527	0.659055		-	-	-	5hrs	DOWN
chr3:65641329-65641914	-1.72561	0.276151	-1.5502	0.841119		-	-	-	5hrs	DOWN
chr3:67073401-67074007	-2.79599	0.0894179	-2.08071	0.721887		-	-	-	5hrs	DOWN
chr3:67396027-67396730	-2.31057	0.17236	-2.13516	0.797025		ENSGALG00000014985	HS3ST5	heparan_sulfate_(glucosamine)_3-O-sulfotransferase_5	5hrs	DOWN
chr3:70019232-70020054	-2.79599	0.0592372	-2.7022	0.541233		-	-	-	5hrs	DOWN
chr3:74409623-74410154	-2.44807	0.14498	-1.7022	0.810367		-	-	-	5hrs	DOWN
chr3:78113120-78113990	-1.93617	0.121901	-1.66567	0.605225		-	-	-	5hrs	DOWN
chr3:78114987-78116143	-1.98864	0.100246	-1.5975	0.572554		-	-	-	5hrs	DOWN
chr3:79589859-79590959	-1.89553	0.191885	-1.87213	0.710258		-	-	-	5hrs	DOWN
chr3:83490294-83508861	-2.31057	0.602213	-2.13516	0.797025		ENSGALG00000015903	FILIP1	filamin_A_interacting_protein_1	5hrs	DOWN
chr3:83490294-83508861	-2.68908	0.200149	-2.63766	0.255818		ENSGALG00000015903	FILIP1	filamin_A_interacting_protein_1	5hrs	DOWN
chr3:83490294-83508861	-3.34619	0.228577	-3.35755	0.233053		ENSGALG00000015903	FILIP1	filamin_A_interacting_protein_1	5hrs	DOWN
chr3:83490294-83508861	-3.09298	0.224542	-3.03562	0.265658		ENSGALG00000015903	FILIP1	filamin_A_interacting_protein_1	5hrs	DOWN
chr3:93702165-93702886	-2.5736	0.0648412	-2.4888	0.521698		ENSGALG00000016350	ARHGEF10	Rho_guanine_nucleotide_exchange_factor_(GEF)_10	5hrs	DOWN
chr3:99737014-99737988	-2.21103	0.14956	-2.66567	0.671461		-	-	-	5hrs	DOWN
chr3:110154863-110155259	-3.31057	0.0827423	-3.13516	0.739838		-	-	-	5hrs	DOWN
chr4:9081689-9084775	-2.79599	0.0894179	-1.77259	0.642122		ENSGALG00000007097	RPS6KA6	ribosomal_protein_S6_kinase,_90kDa,_polypeptide_6	5hrs	DOWN
chr4:23272416-23295330	-1.53178	0.0779581	-1.65857	0.151133		ENSGALG00000020249	RAPGEF2	Rap_guanine_nucleotide_exchange_factor_(GEF)_2	5hrs	DOWN
chr4:23305945-23312402	-1.56018	0.0708698	-1.5628	0.234261		ENSGALG00000020249	RAPGEF2	Rap_guanine_nucleotide_exchange_factor_(GEF)_2	5hrs	DOWN
chr4:35210867-35212210	-2.98864	0.122956	-3.13516	0.739838		-	SH2D4A	SH2_domain_containing_4A	5hrs	DOWN
chr4:35544666-35548734	-2.68908	0.104472	-2.13516	0.634461		ENSGALG00000010207	LARP1B	La_ribonucleoprotein_domain_family,_member_1B	5hrs	DOWN
chr4:36118100-36121819	-1.72561	0.276151	-2.5502	0.701624		ENSGALG00000010333	CNOT6L	CCR4-NOT_transcription_complex,_subunit_6-like	5hrs	DOWN
chr4:40940826-40965995	-1.9886	0.136384	-3.13516	0.398263		ENSGALG00000010642	IRF2	interferon_regulatory_factor_2	5hrs	DOWN
chr4:48279342-48285080	-2.98864	0.0665122	-3.4888	0.420808		ENSGALG00000011227	CDS1	CDP-diacylglycerol_synthase_(phosphatidate_cytidylyltransferase)_1	5hrs	DOWN
chr4:50638220-50671637	-2.1208	0.542901	-1.8145	0.0620511		-	IGFBP7	insulin-like_growth_factor_binding_protein_7	5hrs	DOWN
chr4:61725648-61752791	-1.96588	0.118733	-2.3499	0.0683042		ENSGALG00000000055	LAMTOR3	Ragulator_complex_protein_LAMTOR3	5hrs	DOWN
chr4:63306023-63352535	-2.49715	0.0670098	-3.03562	0.265658		-	-	-	5hrs	DOWN
chr4:476297-481000	-1.79599	0.219533	-2.3278	0.404984		-	-	-	5hrs	DOWN
chr4:3896432-3914034	-2.89553	0.0769295	-2.96523	0.586442		ENSGALG00000006087	GPC3	glypican_3	5hrs	DOWN
chr4:40667562-40675796	-1.66671	0.230747	-2.38027	0.639824		ENSGALG00000010610	SNX25	sorting_nexin_25	5hrs	DOWN
chr4:50745584-50752598	-1.70492	0.327786	-4.13516	0.463486		ENSGALG00000011404	HOPX	HOP_homeobox	5hrs	DOWN
chr4:55287222-55288678	-2.31057	0.17236	-2.5502	0.701624		ENSGALG00000011862	ADAD1	adenosine_deaminase_domain_containing_1_(testis-specific)	5hrs	DOWN
chr4:56293438-56300309	-1.86311	0.235389	-2.66567	0.671461		-	-	-	5hrs	DOWN
chr4:57812082-57837114	-1.5736	0.17748	-1.88277	0.494598		ENSGALG00000012018	UGT8	UDP_glycosyltransferase_8	5hrs	DOWN
chr4:65061929-65074787	-2.31057	0.0707559	-3.7022	0.217903		ENSGALG00000013661	EFHA2	EF-hand_domain_family,_member_A2	5hrs	DOWN
chr4:85092339-85121401	-1.95547	0.0819558	-1.90383	0.403867		-	LOC422877	similar_to_RIKEN_cDNA_A930005I04_gene	5hrs	DOWN
chr4:85171894-85173515	-2.5736	0.122722	-2.66567	0.671461		ENSGALG00000015635	HTT	huntingtin	5hrs	DOWN
chr4:61708-62798	-1.5736	0.237723	-1.5502	0.710475		ENSGALG00000004715	ZC3H12B	zinc_finger_CCCH-type_containing_12B	5hrs	DOWN
chr4:995842-996662	-1.53884	0.152935	-1.51543	0.5168		-	-	-	5hrs	DOWN
chr4:1329367-1330260	-1.5736	0.289847	-1.5502	0.791927		ENSGALG00000004128	CYSLTR1	cysteinyl_leukotriene_receptor_1	5hrs	DOWN
chr4:1664464-1665037	-1.89553	0.191885	-1.87213	0.710258		-	NHSL2	NHS-like_2	5hrs	DOWN
chr4:9541246-9541621	-1.72561	0.276151	-1.7022	0.810367		-	-	-	5hrs	DOWN
chr4:10018339-10018937	-3.31057	0.0827423	-3.28716	0.704402		-	-	-	5hrs	DOWN
chr4:11534347-11534773	-1.91464	0.16126	-1.89123	0.650759		-	-	-	5hrs	DOWN
chr4:11542498-11543289	-1.75417	0.129928	-1.59327	0.549364		ENSGALG00000007570	LOC422310	similar_to_Zinc_finger_protein_534	5hrs	DOWN
[truncated: 5,747 more rows]
