# Supplementary material for: A gene regulatory network for neural induction
Source: eLife. 2023 Mar 3;12:e73189. doi: 10.7554/eLife.73189 (PMC10038663; doi:10.7554/eLife.73189)
Supplement: Figure 1—source data 2. [file elife-73189-fig1-data2.xlsx]

## Sheet: Suppl Table S17
Supplementary Table S17. RNAseq galGal4 analysis key
Differentially expressed transcripts were reanalysed by performing DESeq analysis on RNAseq data aligned to the galGal4 chicken genome.
Colour codes:
	Transcript is differentially expressed by a log2 fold change of ≥1.2 and is significant using a p-value of <0.05
	Transcript is differentially expressed with a minimum log2 fold change of ≥1.2 , but is not significant when using a p-value of <0.05
	Transcriptional regulators identified from this analysis are highlighted in the "Gene Symbol" column
	Transcriptional regulators that are duplicated in the data (based on different naming annotations; in brackets)

## Sheet: Suppl Table S18
Supplementary Table S18. RNAseq galGal4 differentially expressed transcripts
Transcript Accession ID	Induced Base Mean	Uninduced Base Mean	log2 Fold Change	P-Value	Chromosome	Start Coordinate	Stop Coordinate	Gene Symbol	Gene Description	Time point	Regulation
NM_001080874	13358.1	514.441	4.69857	6.9e-38	chr2	11730526	11734096	ERNI	ERNI	5	UP
NM_001080874	15478.4	662.949	4.54521	8.44e-37	chr3	89377527	89381171	ERNI	ERNI	5	UP
NM_001080874	12687.5	534.825	4.56819	3.95e-36	chrZ	25448228	25451857	ERNI	ERNI	5	UP
NM_001080873	9756.41	414.465	4.55703	1.5e-34	chr2	36820695	36824921	ENS-1	ENS-1	5	UP
NM_001080873	11160.6	542.59	4.36241	3.61e-33	chr2	93007482	93251218	ENS-1	ENS-1	5	UP
ENSGALT00000036512	1906.24	18.559	6.68247	2.93e-23	chr1	153125272	153143030	EDNRB	endothelin_receptor_type_B	5	UP
NM_204354	838.619	1.94129	8.75486	2.73e-22	chr1	43171636	43175978	DUSP6	dual_specificity_phosphatase_6	5	UP
ENSGALT00000026498	848.697	1.95358	8.76298	3.8e-20	chr1	119632059	119703945	MAP3K15	mitogen-activated_protein_kinase_kinase_kinase_15	5	UP
ENSGALT00000038357	833.341	1.95358	8.73664	6.35e-20	chr1	43171636	43175978	MKP3	dual_specificity_protein_phosphatase_6_[Source:RefSeq_peptide;Acc:NP_989685]	5	UP
ENSGALT00000038194	5872.29	226.616	4.6956	6.38e-19	chr2	36821974	36823446	-	-	5	UP
NM_204632	964.309	17.4716	5.78641	4.83e-18	chrUn_AADN03018149	1	1440	ENS-3	pol-like_protein_ENS-3	5	UP
ENSGALT00000025383	5134.16	217.824	4.55889	6.93e-18	chr2	93248440	93249914	-	-	5	UP
ENSGALT00000021797	1381.05	26.3734	5.71054	1.16e-17	chr2	98628114	98720357	SOGA2	SOGA_family_member_2_[Source:HGNC_Symbol;Acc:29121]	5	UP
ENSGALT00000025572	1277.65	22.4662	5.8296	1.47e-17	chr2	122641586	122657831	CA2	carbonic_anhydrase_II	5	UP
NM_204632	755.169	16.5009	5.51618	1.46e-14	chrUn_JH376395	1	3519	ENS-3	pol-like_protein_ENS-3	5	UP
ENSGALT00000024915	2542	133.82	4.24759	1.77e-14	chrZ	55321454	55373334	ZNF462	zinc_finger_protein_462	5	UP
ENSGALT00000023996	2033.19	125.029	4.02341	8.51e-13	chr3	61222960	61230461	GJA1	gap_junction_protein,_alpha_1,_43kDa	5	UP
ENSGALT00000036630	392.1	0.976791	8.64896	1.55e-12	chr2	124823183	124932746	RUNX1T1	runt-related_transcription_factor_1;_translocated_to,_1_(cyclin_D-related)	5	UP
NM_204632	572.816	10.6771	5.74548	1.89e-12	chrUn_AADN03017473	1	1367	ENS-3	pol-like_protein_ENS-3	5	UP
ENSGALT00000018765	4744.11	427.834	3.47101	4.77e-12	chr5	50128408	50229625	CKB	creatine_kinase,_brain	5	UP
ENSGALT00000006362	6854.08	672.032	3.35036	7.27e-12	chr3	104239247	104259227	DNMT3A	DNA_(cytosine-5-)-methyltransferase_3_alpha	5	UP
ENSGALT00000005499	1132.28	59.5843	4.24815	1.54e-11	chr22	2563994	2574099	SFRP1	secreted_frizzled-related_protein_1	5	UP
ENSGALT00000038341	8040.61	892.787	3.17092	4.47e-11	chr1	43275194	43305815	ATP2B1	ATPase,_Ca++_transporting,_plasma_membrane_1	5	UP
ENSGALT00000018372	8257.65	921.114	3.16428	4.62e-11	chr1	43273705	43305815	ATP2B1	ATPase,_Ca++_transporting,_plasma_membrane_1	5	UP
ENSGALT00000015872	845.626	39.0716	4.43583	7.36e-11	chr1	31675730	31723743	LRIG3	leucine-rich_repeats_and_immunoglobulin-like_domains_3	5	UP
ENSGALT00000044655	654.183	25.3966	4.68699	2.61e-10	chr5	55680635	55688787	OTX2	orthodenticle_homeobox_2	5	UP
ENSGALT00000010497	326.58	1.95358	7.38517	2.81e-10	chr4	4526498	4529234	ZIC3	Zic_family_member_3_heterotaxy_1_(odd-paired_homolog,_Drosophila)	5	UP
ENSGALT00000045776	1813.08	166.054	3.44871	4.32e-10	chr3	28548397	28582219	KCNK5	potassium_channel,_subfamily_K,_member_5	5	UP
ENSGALT00000002646	1399.48	122.099	3.51877	1.13e-09	chr18	4000419	4034329	TNRC6C	trinucleotide_repeat_containing_6C	5	UP
NM_204632	557.362	25.2367	4.46502	2.17e-09	chr2	71690501	71691751	ENS-3	pol-like_protein_ENS-3	5	UP
ENSGALT00000043782	537.474	23.443	4.51897	5.73e-09	chr2	68593991	68596135	RNF152	ring_finger_protein_152	5	UP
ENSGALT00000015703	348.079	6.83754	5.66979	8.21e-09	chr2	23702023	23740814	COL1A2	collagen,_type_I,_alpha_2	5	UP
ENSGALT00000023722	7361.86	1136.01	2.6961	1.15e-08	chrZ	16664861	16719903	PPAP2A	phosphatidic_acid_phosphatase_type_2A	5	UP
ENSGALT00000018595	1447.6	159.217	3.18459	1.54e-08	chr1	45425568	45437573	USP44	ubiquitin_specific_peptidase_44	5	UP
ENSGALT00000019825	415.647	14.6519	4.8262	2.23e-08	chr5	4617461	4708148	MPPED2	metallophosphoesterase_domain_containing_2	5	UP
ENSGALT00000026860	365.482	10.7447	5.08811	3.36e-08	chr1	127805904	127818492	ARSH	arylsulfatase_family,_member_H	5	UP
ENSGALT00000008924	750.416	59.5843	3.65469	3.85e-08	chr15	9334789	9365480	MSI1	musashi_homolog_1_(Drosophila)	5	UP
ENSGALT00000027192	505.738	26.3734	4.26124	3.92e-08	chr1	137442560	137737925	MYO16	myosin_XVI	5	UP
ENSGALT00000006583	375.72	12.6983	4.88695	5.27e-08	chr7	5701701	5823487	SH3BP4	SH3-domain_binding_protein_4	5	UP
ENSGALT00000011713	310.199	6.83754	5.50358	5.58e-08	chr4	9570162	9573092	TRAIL-LIKE	TNF-related_apoptosis_inducing_ligand-like	5	UP
NM_205199	443.005	24.2661	4.19031	1.86e-07	chr1	168094323	168095755	LPAR6	LPAR6	5	UP
ENSGALT00000042822	364.459	15.6287	4.54349	2.72e-07	chr5	4595945	4713051	MPPED2	metallophosphoesterase_domain_containing_2	5	UP
ENSGALT00000008827	522.118	38.0948	3.77671	3.47e-07	chr12	8535419	8595065	IL17RD	interleukin_17_receptor_D	5	UP
ENSGALT00000016330	276.415	7.81433	5.14457	5.67e-07	chr1	35803700	35863585	PTPRB	protein_tyrosine_phosphatase,_receptor_type,_B	5	UP
ENSGALT00000042658	1138.42	155.31	2.87381	6.12e-07	chr2	39178221	39184075	EOMES	eomesodermin_homolog_(Xenopus_laevis)	5	UP
ENSGALT00000024891	206.8	2.93037	6.14101	1.19e-06	chrZ	54549995	54641346	ABCA1	ATP-binding_cassette,_sub-family_A_(ABC1),_member_1	5	UP
ENSGALT00000018074	302.009	12.6983	4.57189	1.44e-06	chr8	27415315	27426443	PDE4B	phosphodiesterase_4B,_cAMP-specific_(phosphodiesterase_E4_dunce_homolog,_Drosophila)	5	UP
ENSGALT00000004699	2558.38	486.442	2.39489	1.67e-06	chr13	9540037	9588985	NSD1	nuclear_receptor_binding_SET_domain_protein_1	5	UP
ENSGALT00000019766	241.607	6.83754	5.14304	2.15e-06	-	-	-	-	-	5	UP
ENSGALT00000045950	374.696	25.3966	3.88302	3.01e-06	chr6	32099555	32274313	ADAM12	ADAM_metallopeptidase_domain_12_(meltrin_alpha)	5	UP
ENSGALT00000009258	1633.92	300.852	2.44121	3.94e-06	chr2	4562086	4592894	VILL	villin-like	5	UP
ENSGALT00000017947	858.935	124.052	2.7916	4.29e-06	chr8	26764667	26783622	PGM1	phosphoglucomutase_1	5	UP
ENSGALT00000004434	2322.91	471.79	2.29972	4.73e-06	chr8	3995481	4052393	MTA1	metastasis_associated_1	5	UP
ENSGALT00000037759	185.301	2.93037	5.98264	4.8e-06	chrZ	54551776	54642132	ABCA1	ATP-binding_cassette,_sub-family_A_(ABC1),_member_1	5	UP
ENSGALT00000027460	325.556	20.5126	3.98832	5.98e-06	chr1	168094745	168095671	-	-	5	UP
ENSGALT00000021603	607.09	75.2129	3.01286	7.28e-06	chr11	13444163	13487596	VAT1L	vesicle_amine_transport_protein_1_homolog_(T._californica)-like	5	UP
ENSGALT00000020791	315.318	20.5126	3.94223	9.03e-06	chr6	32101481	32274136	ADAM12	ADAM_metallopeptidase_domain_12_(meltrin_alpha)	5	UP
ENSGALT00000042925	426.908	41.0252	3.37934	1.03e-05	chr1	54543812	54741556	CHST11	carbohydrate_(chondroitin_4)_sulfotransferase_11	5	UP
ENSGALT00000000877	297.914	18.559	4.0047	1.11e-05	chr28	849860	858519	ANGPTL4	angiopoietin-like_4	5	UP
ENSGALT00000044077	1870.41	393.647	2.24838	1.22e-05	chr3	68308554	68388939	LIN28B	lin-28_homolog_B_(C._elegans)	5	UP
ENSGALT00000003612	180.182	3.90716	5.52719	1.38e-05	chr19	4751717	4761990	TMEM132E	Transmembrane_protein_132E	5	UP
ENSGALT00000000962	629.613	86.9344	2.85647	1.41e-05	chr26	2015809	2024500	NUAK2	NUAK_family,_SNF1-like_kinase,_2	5	UP
ENSGALT00000025190	1731.18	381.925	2.18039	2.49e-05	chrZ	62474980	62580840	VCAN	versican	5	UP
ENSGALT00000020916	2173.44	507.931	2.09728	2.83e-05	chr1	56529993	56569101	TRIM24	tripartite_motif-containing_24	5	UP
ENSGALT00000020272	243.655	14.6519	4.05568	4.11e-05	chr7	31350096	31932431	LRP1	low_density_lipoprotein_receptor-related_protein_1	5	UP
ENSGALT00000028081	167.897	4.88395	5.10338	5.43e-05	chr3	22667611	22700224	PKDCC	protein_kinase_domain_containing,_cytoplasmic_[Source:HGNC_Symbol;Acc:25123]	5	UP
ENSGALT00000008368	456.597	60.561	2.91446	5.71e-05	chr12	6453844	6563101	WNK2	WNK_lysine_deficient_protein_kinase_2	5	UP
ENSGALT00000000519	320.437	31.2573	3.35778	6.83e-05	chr27	2302639	2319626	ITGB3	integrin,_beta_3_(platelet_glycoprotein_IIIa,_antigen_CD61)	5	UP
ENSGALT00000037199	300.986	27.3501	3.46007	6.92e-05	chr1	75682821	75711590	-	-	5	UP
ENSGALT00000003608	425.884	55.6771	2.93531	7.5e-05	chrZ	72384248	72497040	SEMA6A	sema_domain,_transmembrane_domain_(TM),_and_cytoplasmic_domain,_(semaphorin)_6A	5	UP
ENSGALT00000017734	209.871	11.7215	4.16227	8.63e-05	chr4	45006256	45022555	RASGEF1B	Uncharacterized_protein_[Source:UniProtKB/TrEMBL;Acc:E1C4X8]	5	UP
ENSGALT00000013746	1360.58	319.411	2.09073	8.72e-05	chr1	1088059	1099472	NET1	neuroepithelial_cell_transforming_gene_1	5	UP
ENSGALT00000046105	230.346	15.6287	3.88154	9.92e-05	chr6	32101481	32274136	ADAM12	ADAM_metallopeptidase_domain_12_(meltrin_alpha)	5	UP
ENSGALT00000044350	271.297	23.443	3.53264	0.000102169	-	-	-	-	-	5	UP
ENSGALT00000004569	280.51	25.3966	3.46535	0.000104163	chr3	56656446	56707127	ENPP1	ectonucleotide_pyrophosphatase/phosphodiesterase_1	5	UP
ENSGALT00000003322	199.633	10.7447	4.21566	0.00010573	chrZ	70616134	70631808	TMOD1	tropomodulin_1	5	UP
ENSGALT00000000627	314.294	33.2109	3.24239	0.000116273	chr27	2412670	2426010	MRC2	mannose_receptor,_C_type_2	5	UP
ENSGALT00000045746	175.063	7.81433	4.48561	0.000138259	chr10	14166476	14183190	RGMA	RGM_domain_family,_member_A	5	UP
ENSGALT00000037948	181.206	8.79112	4.36544	0.00014246	chr4	48787272	48788448	DUSP4	dual_specificity_phosphatase_4	5	UP
ENSGALT00000019746	360.364	46.886	2.94223	0.000172661	chr5	55195435	55251288	C14orf37	Chromosome_14_open_reading_frame_37	5	UP
ENSGALT00000018726	117.732	1.95358	5.91325	0.00023633	chr3	42233585	42241528	T (Bra)	T,_brachyury_homolog_(mouse)	5	UP
ENSGALT00000024082	231.37	19.5358	3.56601	0.000236655	chrZ	24132637	24134407	ENC1	ectodermal-neural_cortex_(with_BTB-like_domain)	5	UP
ENSGALT00000013972	104.424	0.976791	6.74018	0.00027026	chr6	25517713	25527369	DUSP5	Dual_specificity_phosphatase_5	5	UP
NM_204718	607.844	133.949	2.18202	0.000273803	chr23	1392504	1394720	CITED4	Cbp/p300-interacting_transactivator,_with_Glu/Asp-rich_carboxy-terminal_domain,_4	5	UP
NM_204700	558.392	116.477	2.26123	0.000289435	chrZ	42279737	42284402	CFC1B	cripto,_FRL-1,_cryptic_family_1B	5	UP
ENSGALT00000000882	750.416	166.054	2.17603	0.000291521	chr26	276158	308776	KIF21B	kinesin_family_member_21B	5	UP
NM_001079503	674.81	162.097	2.05762	0.00030967	chr1	35387492	35390048	YEATS4	YEATS_domain_containing_4	5	UP
ENSGALT00000025294	553.854	107.447	2.36588	0.000318186	chr1	97651373	97654841	NRIP1	nuclear_receptor_interacting_protein_1	5	UP
ENSGALT00000036884	572.282	113.308	2.33648	0.000324755	chr3	98778413	98780948	MYCN	V-myc_myelocytomatosis_viral_related_oncogene,_neuroblastoma_derived_(avian)	5	UP
ENSGALT00000022540	600.947	122.099	2.29919	0.000326667	chr2	98808839	99165339	PTPRM	protein_tyrosine_phosphatase,_receptor_type,_M_[Source:HGNC_Symbol;Acc:9675]	5	UP
ENSGALT00000021539	203.728	15.6287	3.70438	0.000336944	chr2	85762001	85791468	TERT	telomerase_reverse_transcriptase	5	UP
ENSGALT00000038397	252.869	26.3734	3.26124	0.000357845	chr10	17337459	17420513	IGDCC3	Uncharacterized_protein_[Source:UniProtKB/TrEMBL;Acc:E1BX96]	5	UP
ENSGALT00000026447	191.443	13.6751	3.8073	0.000371762	chr3	94137727	94138918	SOX11	SRY_(sex_determining_region_Y)-box_11	5	UP
ENSGALT00000036696	349.102	50.7931	2.78094	0.000374876	chr2	116194098	116199530	PRDM14	PR_domain_containing_14_[Source:HGNC_Symbol;Acc:14001]	5	UP
ENSGALT00000027327	205.776	17.5822	3.54888	0.00047628	chr1	151896141	151897919	SPRY2	sprouty_homolog_2_(Drosophila)	5	UP
ENSGALT00000012260	1219.3	335.039	1.86365	0.000497119	chr13	17454811	17485572	DPYSL3	dihydropyrimidinase-like_3	5	UP
ENSGALT00000045896	96.2335	0.976791	6.62235	0.000519655	-	-	-	GPR182	G_protein-coupled_receptor_182_[Source:HGNC_Symbol;Acc:13708]	5	UP
ENSGALT00000042798	353.197	55.6771	2.66532	0.000551394	chr3	39117532	39125391	RHOU	ras_homolog_family_member_U_[Source:HGNC_Symbol;Acc:17794]	5	UP
ENSGALT00000012217	737.108	178.753	2.04391	0.000626964	chr5	16827732	16840932	CCND1	cyclin_D1	5	UP
ENSGALT00000044331	641.898	147.495	2.12167	0.000636888	chr14	10018056	10045219	CARHSP1	Calcium_regulated_heat_stable_protein_1,_24kDa	5	UP
ENSGALT00000024824	203.728	18.559	3.45645	0.000637799	chr3	67757130	67863760	BLIMP-1	Blimp-1_[Source:UniProtKB/TrEMBL;Acc:B2DFX5]	5	UP
ENSGALT00000001297	607.09	136.751	2.15036	0.000659243	chr26	2476911	2498502	MAPKAPK2	mitogen-activated_protein_kinase-activated_protein_kinase_2	5	UP
ENSGALT00000020607	570.235	125.029	2.18929	0.000669994	chrZ	42279474	42284756	CFC1	Cryptic_protein_[Source:UniProtKB/Swiss-Prot;Acc:Q9I8Q3]	5	UP
ENSGALT00000013089	1682.04	509.885	1.72197	0.00067552	chr5	21649226	21661084	ASTL	astacin-like_metallo-endopeptidase_(M12_family)	5	UP
ENSGALT00000004354	145.374	7.81433	4.2175	0.000739683	chr8	3868563	3869502	TMEM121	transmembrane_protein_121	5	UP
ENSGALT00000017094	160.73	10.7447	3.90295	0.000790984	chr14	4077653	4081514	SLC29A4	solute_carrier_family_29_(equilibrative_nucleoside_transporter),_member_4_[Source:HGNC_Symbol;Acc:23097]	5	UP
ENSGALT00000044371	674.658	163.124	2.04819	0.000793405	chr1	35387340	35392074	GAS41 (YEATS4)	YEATS_domain-containing_protein_4_[Source:RefSeq_peptide;Acc:NP_001072971]	5	UP
ENSGALT00000000960	589.686	134.797	2.12916	0.000801557	chr23	1392831	1394720	CITED3 (CITED4)	Cbp/p300-interacting_transactivator_3_[Source:UniProtKB/Swiss-Prot;Acc:Q9I8K7]	5	UP
ENSGALT00000012579	124.899	4.88395	4.67657	0.00080955	chr7	7716438	7883898	TMEFF2	transmembrane_protein_with_EGF-like_and_two_follistatin-like_domains_2	5	UP
ENSGALT00000015940	90.0909	0.976791	6.52719	0.000851942	chr5	30506654	30675196	MEIS2	Meis_homeobox_2	5	UP
ENSGALT00000024450	222.156	24.4198	3.18545	0.000854542	chr24	322586	362342	CDON	Cdon_homolog_(mouse)	5	UP
ENSGALT00000017953	627.565	149.449	2.07011	0.00088142	chr8	26884365	26926589	ROR1	receptor_tyrosine_kinase-like_orphan_receptor_1	5	UP
ENSGALT00000006504	302.009	45.9092	2.71774	0.000894003	chr17	5732997	5792450	FNBP1	formin_binding_protein_1	5	UP
ENSGALT00000006552	89.0672	0.976791	6.5107	0.000925407	chr6	10363678	10367450	STOX1	storkhead_box_1_[Source:HGNC_Symbol;Acc:23508]	5	UP
ENSGALT00000015939	88.0434	0.976791	6.49402	0.0010053	chr5	30506654	30675196	MEIS2	Meis_homeobox_2	5	UP
ENSGALT00000030027	88.0434	0.976791	6.49402	0.0010053	chr1	194551972	194555607	RELT	RELT_tumor_necrosis_factor_receptor_[Source:HGNC_Symbol;Acc:13764]	5	UP
ENSGALT00000011547	333.746	56.6539	2.5585	0.00103471	chr5	16078378	16087971	FADS1	fatty_acid_desaturase_1	5	UP
ENSGALT00000017745	348.079	61.5378	2.49987	0.0010858	chr2	30757165	30909032	RAPGEF5	Rap_guanine_nucleotide_exchange_factor_(GEF)_5_[Source:HGNC_Symbol;Acc:16862]	5	UP
NM_204909	673.78	194.129	1.79526	0.00128265	chr3	101365504	101367831	RHOB	ras_homolog_gene_family,_member_B	5	UP
ENSGALT00000024539	219.085	26.3734	3.05434	0.00130591	chrZ	44325333	44479158	ROR2	receptor_tyrosine_kinase-like_orphan_receptor_2	5	UP
NM_204195	886.01	293.134	1.59576	0.00136713	chr4	10485878	10487700	SOX3	SRY_(sex_determining_region_Y)-box_3	5	UP
ENSGALT00000013975	196.562	21.4894	3.19329	0.00148115	chr7	11950837	12015748	ADAM23	ADAM_metallopeptidase_domain_23	5	UP
ENSGALT00000014067	933.67	278.385	1.74583	0.00173478	chr5	24215768	24250023	TYRO3	TYRO3_protein_tyrosine_kinase	5	UP
ENSGALT00000010718	7483.69	2847.35	1.39413	0.00187599	chr20	10595951	10609143	DNMT3B	DNA_(cytosine-5-)-methyltransferase_3_beta	5	UP
ENSGALT00000022785	128.994	7.81433	4.04504	0.00187674	chr5	21455062	21473619	TSPAN18	tetraspanin_18	5	UP
ENSGALT00000014678	134.113	8.79112	3.93125	0.00188831	chr3	12844081	12878172	JAG1	jagged_1_(Alagille_syndrome)	5	UP
ENSGALT00000006098	218.061	29.3037	2.89558	0.00204889	chr20	5387579	5395077	GHRH	growth_hormone_releasing_hormone	5	UP
ENSGALT00000017902	300.986	54.7003	2.46007	0.00215565	chr1	41521591	41548093	SLC6A15	Solute_carrier_family_6,_member_15	5	UP
ENSGALT00000044863	88.0434	1.95358	5.49402	0.00215853	chr27	3204182	3219385	NGFR	nerve_growth_factor_receptor_(TNFR_superfamily,_member_16)	5	UP
ENSGALT00000042880	95.2097	2.93037	5.02195	0.00227983	chr2	12761772	12762399	FZD8	frizzled_homolog_8_(Drosophila)	5	UP
ENSGALT00000008465	174.039	18.559	3.22922	0.00233072	chr11	11582883	11662192	CDH11	cadherin_11,_type_2,_OB-cadherin_(osteoblast)	5	UP
ENSGALT00000010749	736.084	214.894	1.77624	0.00247743	chr14	7628433	7676063	ABCC1	ATP-binding_cassette,_sub-family_C_(CFTR/MRP),_member_1	5	UP
ENSGALT00000002230	686.943	196.335	1.80687	0.00249931	chr24	2508055	2515621	JAM3	junctional_adhesion_molecule_3	5	UP
ENSGALT00000006958	324.532	64.4682	2.3317	0.0025519	chr19	6316684	6340981	ABR	active_BCR-related_[Source:HGNC_Symbol;Acc:81]	5	UP
ENSGALT00000008839	3809.41	1454.44	1.3891	0.00268124	chr2	3873252	3918131	SETD2	SET_domain_containing_2	5	UP
ENSGALT00000002528	1587.85	557.748	1.50939	0.0027853	chr18	3760264	3808645	SEPT9	septin_9	5	UP
ENSGALT00000039902	242.631	39.0716	2.63457	0.00278657	chr13	16302772	16308299	CCNI2	cyclin_I_family,_member_2_[Source:HGNC_Symbol;Acc:33869]	5	UP
NM_205403	1134.3	445.525	1.34822	0.00287175	chr1	11190856	11223685	GNAI1	guanine_nucleotide_binding_protein_(G_protein),_alpha_inhibiting_activity_polypeptide_1	5	UP
ENSGALT00000038787	148.445	13.6751	3.44031	0.00296633	chr1	30284795	30405559	NELL2	NEL-like_2_(chicken)	5	UP
ENSGALT00000026595	669.539	195.358	1.77705	0.00305839	chr3	101365501	101367829	CRHOB	rho-related_GTP-binding_protein_RhoB_[Source:RefSeq_peptide;Acc:NP_990240]	5	UP
ENSGALT00000017229	114.661	6.83754	4.06776	0.00316344	chr4	89250034	89251887	CNOT2	CCR4-NOT_transcription_complex,_subunit_2	5	UP
ENSGALT00000011105	524.165	140.658	1.89783	0.00321915	chr13	16281839	16300748	KIF3A	kinesin_family_member_3A	5	UP
ENSGALT00000009667	245.703	42.002	2.54838	0.00341241	chr10	10611346	10640515	HOMER2	homer_homolog_2_(Drosophila)	5	UP
ENSGALT00000025719	530.308	144.565	1.87511	0.0034451	chr4	85694572	85708293	RPIA	ribose_5-phosphate_isomerase_A_(ribose_5-phosphate_epimerase)	5	UP
ENSGALT00000008205	152.54	15.6287	3.28692	0.00359373	-	-	-	-	-	5	UP
ENSGALT00000033786	140.255	12.6983	3.46535	0.00360112	chr7	5654087	5654666	ARL4C	ADP-ribosylation_factor-like_4C	5	UP
ENSGALT00000043034	266.178	49.8163	2.4177	0.00379861	-	-	-	TCF7L1	transcription_factor_7-like_1_(T-cell_specific,_HMG-box)	5	UP
ENSGALT00000037877	1572.5	573.376	1.4555	0.00387575	chr2	30690281	30698829	CDCA7L	cell_division_cycle_associated_7-like	5	UP
ENSGALT00000011833	271.297	51.7699	2.38968	0.0038788	chr13	16632914	16636638	GNPDA1	glucosamine-6-phosphate_deaminase_1	5	UP
ENSGALT00000040030	487.31	130.89	1.89648	0.00390903	chr13	15796906	15904202	RAPGEF6	Rap_guanine_nucleotide_exchange_factor_(GEF)_6_[Source:HGNC_Symbol;Acc:20655]	5	UP
ENSGALT00000039140	208.847	32.2341	2.69579	0.00410377	chr9	21720078	21725253	-	-	5	UP
ENSGALT00000038351	570.235	165.078	1.78841	0.00420685	chrZ	27889480	27927357	GLDC	glycine_dehydrogenase_(decarboxylating)	5	UP
ENSGALT00000014386	983.834	334.063	1.5583	0.00427716	chr3	9438435	9460691	UGP2	UDP-glucose_pyrophosphorylase_2	5	UP
ENSGALT00000037398	992.024	337.97	1.55348	0.00432664	chr3	58726122	58785427	RSPO3	R-spondin_3_homolog_(Xenopus_laevis)	5	UP
ENSGALT00000008381	122.851	9.76791	3.65272	0.00450996	chr14	5230049	5338554	CACNA1H	calcium_channel,_voltage-dependent,_T_type,_alpha_1H_subunit	5	UP
ENSGALT00000020241	1036.05	358.482	1.53111	0.00453766	chr5	57989688	58008203	NID2	nidogen_2_(osteonidogen)	5	UP
ENSGALT00000043222	298.938	63.4914	2.23521	0.00459992	chr7	7694858	7704115	SDPR	serum_deprivation_response_(phosphatidylserine_binding_protein)	5	UP
ENSGALT00000019456	135.136	12.6983	3.41171	0.00463512	chr1	75713571	75750893	-	-	5	UP
ENSGALT00000045946	876.339	293.037	1.5804	0.00465157	chr4	10485877	10487700	-	-	5	UP
ENSGALT00000025998	662.373	205.126	1.69113	0.00467535	chr2	148412676	148428775	-	-	5	UP
ENSGALT00000043888	138.208	13.6751	3.33722	0.0048581	chr13	16109314	16143167	PDLIM4	PDZ_and_LIM_domain_4	5	UP
ENSGALT00000016557	979.739	338.946	1.53134	0.00495317	chr3	29680437	29690820	CAPN1	calpain_1,_(mu/I)_large_subunit	5	UP
ENSGALT00000044365	543.617	160.194	1.76277	0.00524625	chr4	48960038	48966650	PPP1R3B	protein_phosphatase_1,_regulatory_(inhibitor)_subunit_3B	5	UP
ENSGALT00000030003	480.144	134.797	1.83268	0.00526316	chr5	21480447	21496826	TP53I11	tumor_protein_p53_inducible_protein_11	5	UP
ENSGALT00000012958	67.5682	0.976791	6.11215	0.00535886	chr20	13713340	13716620	KCNG1	potassium_voltage-gated_channel,_subfamily_G,_member_1	5	UP
ENSGALT00000005829	532.355	156.287	1.7682	0.00537865	chr8	5614756	5623685	GLUL	glutamate-ammonia_ligase_(glutamine_synthetase)	5	UP
ENSGALT00000036592	1496.74	564.585	1.40656	0.00543864	chr1	131443218	131531601	TMEM131	transmembrane_protein_131	5	UP
ENSGALT00000011621	218.061	38.0948	2.51706	0.00562395	chr5	16094680	16111781	FADS2	Fatty_acid_desaturase_2	5	UP
ENSGALT00000015057	414.623	110.377	1.90936	0.00563734	chr9	18987371	19027508	PLD1	phospholipase_D1,_phosphatidylcholine-specific	5	UP
ENSGALT00000010371	163.802	21.4894	2.93025	0.00573372	chr12	10950981	10995867	SLC6A6	Solute_carrier_family_6_(neurotransmitter_transporter,_taurine),_member_6	5	UP
ENSGALT00000000704	186.324	28.3269	2.71757	0.00584156	chr9	17452023	17505171	TBL1XR1	transducin_(beta)-like_1_X-linked_receptor_1	5	UP
ENSGALT00000009265	412.575	110.377	1.90221	0.0058647	chr9	4618198	4630260	ETV5	ets_variant_gene_5_(ets-related_molecule)	5	UP
ENSGALT00000038044	273.344	57.6307	2.24581	0.00586601	chr3	30230595	30238978	POLH	polymerase_(DNA_directed),_eta	5	UP
ENSGALT00000044607	1294.03	482.535	1.42317	0.00591094	chrZ	70555411	70562048	XPA	xeroderma_pigmentosum,_complementation_group_A	5	UP
ENSGALT00000016436	278.463	59.5843	2.22448	0.00591571	chr4	33376763	33407904	FHDC1	FH2_domain_containing_1	5	UP
ENSGALT00000000963	729.941	241.267	1.59715	0.00596932	chr1	192266739	192313761	PAK1	p21_protein_(Cdc42/Rac)-activated_kinase_1	5	UP
ENSGALT00000038263	708.442	232.476	1.60757	0.00601481	chr18	10612486	10648347	ACSF2	acyl-CoA_synthetase_family_member_2	5	UP
ENSGALT00000010777	189.396	30.2805	2.64494	0.00655999	chr20	10633102	10644913	BPIFB8	Ovocalyxin-36_precursor_[Source:RefSeq_peptide;Acc:NP_001026032]	5	UP
ENSGALT00000005954	652.135	211.964	1.62135	0.00662118	chr20	5257491	5275237	PLCG1	phospholipase_C,_gamma_1_[Source:HGNC_Symbol;Acc:9065]	5	UP
ENSGALT00000038867	134.113	14.6519	3.19429	0.00708353	chr1	26960377	27202897	DOCK4	dedicator_of_cytokinesis_4	5	UP
ENSGALT00000030034	84.9721	3.90716	4.4428	0.00722722	chr1	72580253	72591026	PTHRP	Parathyroid_hormone-related_protein_Osteostatin_[Source:UniProtKB/Swiss-Prot;Acc:P17251]	5	UP
ENSGALT00000034417	3218.7	1353.83	1.24943	0.00726679	chr10	6903269	7004127	TCF12	transcription_factor_12	5	UP
ENSGALT00000046156	247.75	51.7699	2.2587	0.00760009	chr13	16557780	16561247	-	-	5	UP
ENSGALT00000012381	633.708	211.964	1.58	0.00839327	chr18	10711116	10718410	SLC9A3R1	solute_carrier_family_9_(sodium/hydrogen_exchanger),_member_3_regulator_1	5	UP
ENSGALT00000016479	216.013	42.002	2.36259	0.00866833	chr8	19696866	19712815	PTCH2	patched_homolog_2_(Drosophila)	5	UP
ENSGALT00000022352	266.178	60.561	2.13593	0.00879204	chr13	13243832	13260270	GFPT2	glutamine-fructose-6-phosphate_transaminase_2	5	UP
ENSGALT00000044535	254.916	56.6539	2.16978	0.00900392	chr5	30010889	30068434	SPRED1	sprouty-related,_EVH1_domain_containing_1	5	UP
ENSGALT00000004374	117.732	11.7215	3.32828	0.00903569	chr8	3981796	3985419	CRIP2	Cysteine-rich_protein_2	5	UP
ENSGALT00000018177	87.0196	4.88395	4.15522	0.00903712	chr2	34036515	34038789	TRIL	Uncharacterized_protein_[Source:UniProtKB/TrEMBL;Acc:F1N8X5]	5	UP
ENSGALT00000027501	186.324	32.2341	2.53116	0.00904728	chr1	169616747	169647630	ATP7B	ATPase,_Cu++_transporting,_beta_polypeptide	5	UP
NM_204632	81.3893	1.94129	5.38975	0.00905944	chrUn_AADN03012976	1	1333	ENS-3	pol-like_protein_ENS-3	5	UP
ENSGALT00000023671	1174.25	457.138	1.36104	0.00925861	chr1	76976249	77009699	EPHA1	EPH_receptor_A1	5	UP
ENSGALT00000000916	325.556	84.9808	1.9377	0.00947687	chr26	1841733	1918228	NFASC	neurofascin	5	UP
ENSGALT00000040544	325.556	84.9808	1.9377	0.00947687	chr26	1841733	1918228	NFASC	neurofascin	5	UP
ENSGALT00000007141	714.585	252.989	1.49803	0.00975974	chr3	2166420	2173865	AHSA2	AHA1,_activator_of_heat_shock_90kDa_protein_ATPase_homolog_2_(yeast)	5	UP
ENSGALT00000044390	147.422	20.5126	2.84536	0.00983346	chr2	148240819	148241680	MAFA	v-maf_musculoaponeurotic_fibrosarcoma_oncogene_homolog_A	5	UP
ENSGALT00000026848	561.021	186.567	1.58836	0.0101882	chr3	105655448	105723050	INTS9	integrator_complex_subunit_9	5	UP
ENSGALT00000022452	146.398	20.5126	2.83531	0.0102604	chr9	17416495	17503898	TBL1XR1	transducin_(beta)-like_1_X-linked_receptor_1	5	UP
ENSGALT00000000917	326.58	86.9344	1.90944	0.0103066	chr26	1841733	1918228	NFASC	neurofascin	5	UP
ENSGALT00000035237	326.58	86.9344	1.90944	0.0103066	chr26	1841733	1918228	NFASC	neurofascin	5	UP
NM_205198	143.204	15.5303	3.20491	0.0107456	chr4	89249766	89252036	LOC396117/ NOT2	LOC396117	5	UP
ENSGALT00000032601	89.0672	5.86075	3.92574	0.0108295	chr5	29940333	29974856	RASGRP1	RAS_guanyl_releasing_protein_1_(calcium_and_DAG-regulated)	5	UP
ENSGALT00000040537	320.437	85.9576	1.89834	0.0111912	chr26	1841733	1918228	NFASC	neurofascin	5	UP
ENSGALT00000023884	436.122	134.797	1.69394	0.0111929	chr2	100479329	100487584	TGIF1	TGFB-induced_factor_homeobox_1	5	UP
ENSGALT00000021284	998.166	388.763	1.36039	0.0113714	chr1	61984895	62003326	BID	BH3_interacting_domain_death_agonist	5	UP
ENSGALT00000009711	134.113	17.5822	2.93125	0.0114083	chr4	3370854	3382816	IL13RA1	interleukin_13_receptor,_alpha_1	5	UP
NM_204917	302.892	77.6515	1.96372	0.0121032	chr2	27406320	27470388	ETV1	ets_variant_gene_1	5	UP
ENSGALT00000043027	519.047	173.869	1.57786	0.0123117	chr3	21184775	21188556	ATF3	activating_transcription_factor_3	5	UP
ENSGALT00000012618	343.984	97.6791	1.81622	0.0123478	chr7	9056253	9171575	SLC39A10	solute_carrier_family_39_(zinc_transporter),_member_10	5	UP
ENSGALT00000031204	316.342	86.9344	1.86349	0.0128916	chr2	27405081	27470669	ER81	ETS_translocation_variant_1_[Source:RefSeq_peptide;Acc:NP_990248]	5	UP
ENSGALT00000002789	117.732	13.6751	3.10589	0.01294	chr18	4235779	4256232	MXRA7	matrix-remodelling_associated_7	5	UP
ENSGALT00000013655	1058.57	424.904	1.31691	0.0130751	chr1	11190978	11223596	GNAI3	guanine_nucleotide_binding_protein_(G_protein),_alpha_inhibiting_activity_polypeptide_3	5	UP
NM_001174106	88.601	3.88257	4.51224	0.0130986	chr1	72580254	72591026	PTHLH	parathyroid_hormone-like_hormone	5	UP
ENSGALT00000017589	224.204	50.7931	2.1421	0.0137917	chr8	24600648	24643425	PPAP2B	phosphatidic_acid_phosphatase_type_2B	5	UP
ENSGALT00000036892	342.96	99.6327	1.78335	0.0138462	chr3	97427884	97448910	TRIB2	tribbles_homolog_2_(Drosophila)	5	UP
ENSGALT00000032993	291.772	78.1433	1.90065	0.0139321	chr8	24753890	24842483	DAB1	disabled_homolog_1_(Drosophila)	5	UP
ENSGALT00000024308	292.795	79.1201	1.88778	0.0143615	chr3	66123599	66154746	WASF1	WAS_protein_family,_member_1	5	UP
ENSGALT00000016060	204.752	43.9556	2.21976	0.0144553	chr4	29544233	29718460	INPP4B	inositol_polyphosphate-4-phosphatase,_type_II,_105kDa	5	UP
ENSGALT00000013920	200.657	42.9788	2.22303	0.0151398	chr3	15666218	15743112	NCX1	sodium/calcium_exchanger_1_precursor_[Source:RefSeq_peptide;Acc:NP_001072941]	5	UP
NM_001030589	683.052	280.516	1.28391	0.0152374	chr12	2945885	2958330	TWF2	twinfilin,_actin-binding_protein,_homolog_2_(Drosophila)	5	UP
ENSGALT00000000813	456.597	153.356	1.57404	0.015894	chr26	1629295	1655910	SOX13	SRY_(sex_determining_region_Y)-box_13	5	UP
ENSGALT00000008207	98.281	9.76791	3.33079	0.0165834	chr11	10631032	10639450	-	-	5	UP
ENSGALT00000015070	124.899	17.5822	2.82857	0.017048	chrZ	8744606	8805424	-	-	5	UP
NM_001079473	213.261	44.6496	2.2559	0.0170675	chr3	15666256	15735768	SLC8A1	solute_carrier_family_8_(sodium/calcium_exchanger),_member_1	5	UP
ENSGALT00000000884	193.491	42.002	2.20373	0.0174427	chr26	1732338	1747306	PIK3C2B	phosphoinositide-3-kinase,_class_2,_beta_polypeptide	5	UP
ENSGALT00000014123	867.125	350.668	1.30613	0.0175245	chr2	19677909	19684966	VIM	vimentin	5	UP
ENSGALT00000008440	264.13	71.3057	1.88916	0.0181888	chr9	7111078	7201192	EPHA4	EPH_receptor_A4	5	UP
ENSGALT00000043891	154.588	28.3269	2.44818	0.0187119	chr13	9523272	9527749	-	-	5	UP
ENSGALT00000008230	680.801	264.71	1.36282	0.0188991	-	-	-	IVNS1ABP	influenza_virus_NS1A_binding_protein	5	UP
ENSGALT00000040176	318.39	95.7255	1.73382	0.0190347	chr11	1240507	1302916	-	-	5	UP
ENSGALT00000046240	117.732	16.6054	2.82578	0.0203501	chr2	82285135	82324750	VSTM2A	V-set_and_transmembrane_domain_containing_2A	5	UP
ENSGALT00000045140	416.671	143.588	1.53697	0.0214485	chr3	105654632	105723673	INTS9	integrator_complex_subunit_9	5	UP
ENSGALT00000015798	80.8771	6.83754	3.56418	0.0227922	chr6	31382329	31425438	CHST15	carbohydrate_(N-acetylgalactosamine_4-sulfate_6-O)_sulfotransferase_15	5	UP
ENSGALT00000001731	135.136	23.443	2.52719	0.0231336	chr19	1349135	1372581	AUTS2	autism_susceptibility_candidate_2	5	UP
ENSGALT00000000423	145.374	27.3501	2.41015	0.0237161	chr22	953201	957709	NEFM	neurofilament,_medium_polypeptide_150kDa	5	UP
ENSGALT00000023141	75.7583	5.86075	3.69225	0.0242022	-	-	-	-	-	5	UP
ENSGALT00000044993	431.003	154.333	1.48165	0.0244942	chr2	17614780	17620068	BMI1	BMI1_polycomb_ring_finger_oncogene	5	UP
ENSGALT00000030630	321.461	103.54	1.63446	0.0253014	chr1	47844408	47852755	ARHGDIB	Rho_GDP_dissociation_inhibitor_(GDI)_beta	5	UP
ENSGALT00000003878	408.48	144.565	1.49855	0.0253243	chr11	1641768	1692729	VAC14	Vac14_homolog_(S._cerevisiae)	5	UP
ENSGALT00000014694	279.487	84.9808	1.71757	0.0261017	chr7	14582882	14641810	CCDC141	coiled-coil_domain_containing_141	5	UP
ENSGALT00000001862	60.4019	2.93037	4.36544	0.0266314	-	-	-	PIK3R5	phosphoinositide-3-kinase,_regulatory_subunit_5,_p101	5	UP
ENSGALT00000011467	447.383	165.078	1.43837	0.0267821	chr6	21551706	21577502	ENTPD1	ectonucleoside_triphosphate_diphosphohydrolase_1	5	UP
ENSGALT00000038732	557.949	220.755	1.33769	0.0276867	chr6	30411292	30490016	FGFR2	fibroblast_growth_factor_receptor_2	5	UP
ENSGALT00000003584	192.467	47.8628	2.00764	0.0277575	chr3	57238295	57239765	TMEM200A	Uncharacterized_protein_[Source:UniProtKB/TrEMBL;Acc:E1BT36]	5	UP
ENSGALT00000006336	678.753	282.293	1.2657	0.0282709	chr12	2945887	2958336	WDR82	WD_repeat_domain_82	5	UP
ENSGALT00000001931	271.297	83.0272	1.70821	0.0284261	chr26	2695758	2786683	PLXNA2	plexin_A2	5	UP
ENSGALT00000008451	118.756	19.5358	2.60381	0.0284521	chr5	6636132	6677259	SYT9	synaptotagmin_IX_[Source:HGNC_Symbol;Acc:19265]	5	UP
ENSGALT00000020366	441.241	164.101	1.42698	0.0284835	chr7	34274370	34333241	KIF5C	kinesin_family_member_5C	5	UP
ENSGALT00000007478	76.782	6.83754	3.48922	0.0288546	chr14	4361219	4366882	ARPC1B	actin_related_protein_2/3_complex,_subunit_1B,_41kDa	5	UP
ENSGALT00000011935	368.554	130.89	1.49352	0.0306629	chr13	16744796	16844189	ARHGAP26	Rho_GTPase_activating_protein_26	5	UP
ENSGALT00000044920	96.2335	12.6983	2.92191	0.030761	chr18	4235779	4256232	MXRA7	matrix-remodelling_associated_7	5	UP
ENSGALT00000044706	71.6632	5.86075	3.61208	0.0309301	chr11	17795543	17807462	ZNF469	zinc_finger_protein_469_[Source:HGNC_Symbol;Acc:23216]	5	UP
ENSGALT00000021109	46.0692	0.976791	5.55961	0.0318539	chr2	74276763	74466274	CDH18	cadherin_18,_type_2	5	UP
ENSGALT00000008391	173.016	42.002	2.04237	0.0326202	chr2	1340186	1469658	ADCYAP1R1	adenylate_cyclase_activating_polypeptide_1_(pituitary)_receptor_type_I	5	UP
ENSGALT00000037253	284.605	92.7951	1.61684	0.0334522	chr4	78787362	78829650	CRMP1B	dihydropyrimidinase-related_protein_1_[Source:RefSeq_peptide;Acc:NP_989826]	5	UP
ENSGALT00000006563	97.2572	13.6751	2.83026	0.033894	chr4	1385885	1387539	GPR23	G_protein-coupled_receptor_23	5	UP
ENSGALT00000004043	261.059	82.0504	1.66979	0.0339813	chr19	4932421	4939398	ASL2	argininosuccinate_lyase	5	UP
ENSGALT00000021363	45.0455	0.976791	5.52719	0.0346834	chr1	62933955	63081609	PTPRO	protein_tyrosine_phosphatase,_receptor_type,_O	5	UP
NM_204495	286.408	92.2111	1.63506	0.0350316	chr4	78787363	78829650	CRMP1	collapsin_response_mediator_protein_1	5	UP
ENSGALT00000015714	132.065	26.3734	2.3241	0.0350862	chr4	24486947	24675736	PALLD	palladin,_cytoskeletal_associated_protein	5	UP
ENSGALT00000038145	167.897	41.0252	2.03299	0.0355149	chr3	29668179	29669945	-	-	5	UP
ENSGALT00000008539	60.4019	3.90716	3.9504	0.0369337	chrZ	43855477	43871400	DIRAS2	DIRAS_family,_GTP-binding_RAS-like_2	5	UP
ENSGALT00000024718	632.684	272.525	1.2151	0.037538	chr3	67393978	67403976	BEND3	Uncharacterized_protein_[Source:UniProtKB/TrEMBL;Acc:F1NMS3]	5	UP
ENSGALT00000037455	44.0217	0.976791	5.49402	0.0377637	chr1	62933510	63080318	PTPRO	protein_tyrosine_phosphatase,_receptor_type,_O	5	UP
ENSGALT00000002653	369.578	137.728	1.42406	0.0380013	chr10	1749545	1760710	CD276	CD276_molecule	5	UP
ENSGALT00000015952	319.413	113.308	1.49518	0.038744	chr3	21114068	21122373	FLVCR1	feline_leukemia_virus_subgroup_C_cellular_receptor_1	5	UP
ENSGALT00000002185	373.673	141.635	1.3996	0.0403301	chr13	7252877	7267298	PWWP2A	PWWP_domain_containing_2A	5	UP
ENSGALT00000028055	77.8058	8.79112	3.14576	0.0405203	chr9	6123832	6124579	SPSB4	splA/ryanodine_receptor_domain_and_SOCS_box_containing_4	5	UP
ENSGALT00000021867	169.944	43.9556	1.95094	0.0409774	chr12	15261644	15275352	C3ORF64	C3ORF64	5	UP
ENSGALT00000018402	87.0196	11.7215	2.89218	0.0412781	chr2	36428841	36470733	KAT2B	K(lysine)_acetyltransferase_2B_[Source:HGNC_Symbol;Acc:8638]	5	UP
ENSGALT00000025300	124.899	25.3966	2.29805	0.0416283	chr4	82209991	82350777	ZFYVE28	zinc_finger,_FYVE_domain_containing_28	5	UP
ENSGALT00000024258	294.843	103.54	1.50976	0.0424207	chr4	78787362	78831496	CRMP1B	dihydropyrimidinase-related_protein_1_[Source:RefSeq_peptide;Acc:NP_989826]	5	UP
NM_001097524	67.9961	3.88257	4.13037	0.0429901	chr4	52775482	52776447	SPRY1	sprouty_homolog_1,_antagonist_of_FGF_signaling_(Drosophila)	5	UP
ENSGALT00000024924	336.817	125.029	1.4297	0.0431513	chr1	91207512	91239079	ILDR2	chromosome_1_open_reading_frame_32	5	UP
ENSGALT00000045163	72.687	7.81433	3.2175	0.0444969	chr23	861070	915914	HIVEP3	human_immunodeficiency_virus_type_I_enhancer_binding_protein_3	5	UP
ENSGALT00000008222	232.394	74.2361	1.64638	0.0446464	chr12	5783473	5867616	FBLN2	Fibulin_2	5	UP
ENSGALT00000043252	157.659	40.0484	1.97699	0.0452874	chr2	1370935	1469539	ADCYAP1R1	adenylate_cyclase_activating_polypeptide_1_(pituitary)_receptor_type_I	5	UP
ENSGALT00000025926	99.3048	16.6054	2.58021	0.0454544	chr4	89237870	89241342	GNOT1	Gnot1_homeodomain_protein	5	UP
ENSGALT00000043414	119.78	24.4198	2.29426	0.0459051	chr21	4405465	4410649	MFAP2	microfibrillar-associated_protein_2_[Source:HGNC_Symbol;Acc:7033]	5	UP
ENSGALT00000017607	436.122	178.753	1.28677	0.0464578	chr7	16830039	16838026	CDCA7	cell_division_cycle_associated_7	5	UP
ENSGALT00000004893	147.422	36.1413	2.02823	0.0470434	chr20	2514608	2564510	CBFA2T2	core-binding_factor,_runt_domain,_alpha_subunit_2;_translocated_to,_2	5	UP
ENSGALT00000015271	64.4969	5.86075	3.46007	0.0473526	chr9	19335718	19336738	GPR160	G_protein-coupled_receptor_160	5	UP
ENSGALT00000012611	87.0196	12.6983	2.77671	0.0476025	chr20	12452386	12456928	CBLN4	cerebellin_4_precursor	5	UP
ENSGALT00000017380	103.4	18.559	2.47804	0.0479307	chrZ	43300147	43343693	S1PR3	sphingosine-1-phosphate_receptor_3_[Source:HGNC_Symbol;Acc:3167]	5	UP
NM_204712	363.676	147.538	1.30157	0.048	chr13	14655191	14662456	CXCL14	chemokine_(C-X-C_motif)_ligand_14	5	UP
NM_001257265	425.491	179.569	1.24459	0.0480938	chr12	11296624	11327866	PLXNB1	plexin_B1	5	UP
ENSGALT00000015002	56.3068	3.90716	3.84912	0.0482908	chr14	13928200	13952329	TBC1D24	TBC1_domain_family,_member_24	5	UP
ENSGALT00000009683	163.802	43.9556	1.89783	0.0490694	chr4	3309255	3364270	DOCK11	dedicator_of_cytokinesis_11_[Source:HGNC_Symbol;Acc:23483]	5	UP
NM_001277336	86.5405	9.70643	3.15636	0.0528839	chr6	21895695	21961777	SLIT1	Slit_homolog_1_(Drosophila)	5	UP
ENSGALT00000044169	154.588	41.0252	1.91384	0.0531378	-	-	-	LMBR1L	limb_region_1_homolog_(mouse)-like_[Source:HGNC_Symbol;Acc:18268]	5	UP
ENSGALT00000043259	261.059	92.7951	1.49225	0.0541072	chr4	78786908	78816741	CRMP1B	dihydropyrimidinase-related_protein_1_[Source:RefSeq_peptide;Acc:NP_989826]	5	UP
ENSGALT00000019690	87.0196	13.6751	2.66979	0.0543169	chr1	50119337	50136416	FAM83F	family_with_sequence_similarity_83,_member_F	5	UP
ENSGALT00000045959	377.768	154.333	1.29145	0.0554106	chrZ	62344744	62440821	HAPLN1	hyaluronan_and_proteoglycan_link_protein_1	5	UP
ENSGALT00000023372	80.8771	11.7215	2.78657	0.0555189	chr4	75524897	75546434	FAM184B	family_with_sequence_similarity_184,_member_B_[Source:HGNC_Symbol;Acc:29235]	5	UP
NM_001278049	113.327	19.4129	2.5454	0.0559593	chr4	1374561	1388213	LPAR4	LPAR4	5	UP
ENSGALT00000040237	189.396	58.6075	1.69225	0.0575243	chr1	1149163	1155872	TUBA4A	tubulin,_alpha_4a	5	UP
ENSGALT00000013010	151.517	41.0252	1.88489	0.0582595	chr20	14136360	14139739	SNAI1	snail_homolog_1_(Drosophila)	5	UP
ENSGALT00000001059	336.817	134.797	1.32118	0.059227	chr26	224385	227839	PIM1	pim-1_oncogene_[Source:HGNC_Symbol;Acc:8986]	5	UP
ENSGALT00000021584	276.415	103.54	1.41665	0.0603309	chr2	88645529	88745491	-	-	5	UP
ENSGALT00000010045	333.746	133.82	1.31845	0.0604381	chr9	4340832	4370707	KIF1A	kinesin_family_member_1A	5	UP
ENSGALT00000000491	409.504	174.846	1.2278	0.06078	chr26	629080	649588	NAV1	neuron_navigator_1_[Source:HGNC_Symbol;Acc:15989]	5	UP
ENSGALT00000010256	362.411	149.449	1.27797	0.0609282	chr13	14654458	14662648	JSC	C-X-C_motif_chemokine_14_precursor_[Source:RefSeq_peptide;Acc:NP_990043]	5	UP
ENSGALT00000030094	285.629	109.401	1.38452	0.0626045	chr1	176600273	176640839	SPATA13	spermatogenesis_associated_13	5	UP
ENSGALT00000005391	299.962	117.215	1.35562	0.0631235	chr20	3027212	3045691	SOGA1	suppressor_of_glucose,_autophagy_associated_1_[Source:HGNC_Symbol;Acc:16111]	5	UP
ENSGALT00000037416	152.54	42.9788	1.82749	0.0640545	chr5	52793691	52805593	ZBTB1	zinc_finger_and_BTB_domain_containing_1	5	UP
ENSGALT00000045614	173.016	52.7467	1.71375	0.0642119	chr10	17041537	17094017	CHSY1	chondroitin_sulfate_synthase_1	5	UP
ENSGALT00000017901	244.679	88.888	1.46083	0.0646671	chr8	26691600	26712046	ALG6	asparagine-linked_glycosylation_6_homolog_(S._cerevisiae,_alpha-1,3-glucosyltransferase)	5	UP
ENSGALT00000038433	196.562	64.4682	1.60832	0.0647864	chr18	9907402	9915762	CBX2	Chromobox_homolog_2_(Pc_class_homolog,_Drosophila)	5	UP
ENSGALT00000004722	311.223	124.052	1.327	0.0648731	chr13	9531751	9533980	RAB24	RAB24,_member_RAS_oncogene_family	5	UP
ENSGALT00000001434	259.011	96.7023	1.42139	0.0655538	chr24	373686	377118	CHEK1	serine/threonine-protein_kinase_Chk1_[Source:RefSeq_peptide;Acc:NP_989676]	5	UP
ENSGALT00000015841	90.0909	16.6054	2.43973	0.067356	chr4	28118549	28128788	PCDH18	protocadherin_18	5	UP
ENSGALT00000044247	345.007	143.588	1.26469	0.067466	chr12	3137488	3139245	-	-	5	UP
ENSGALT00000044810	36.8554	0.976791	5.23768	0.0684473	chr9	15406843	15413438	CHRD	chordin	5	UP
NM_204345	260.652	96.0937	1.43961	0.0691163	chr24	373538	376686	STT3A	STT3,_subunit_of_the_oligosaccharyltransferase_complex,_homolog_A_(S._cerevisiae)	5	UP
NM_001277351	190.595	58.2386	1.71046	0.0696313	chr1	1149259	1155769	TUBAL3	TUBAL3	5	UP
ENSGALT00000039756	54.2593	4.88395	3.47375	0.0703221	chr6	19976862	20045126	MYOF	myoferlin_[Source:HGNC_Symbol;Acc:3656]	5	UP
ENSGALT00000019715	75.7583	11.7215	2.69225	0.0708845	chr4	56717323	56732218	C4ORF21	Uncharacterized_protein_[Source:UniProtKB/TrEMBL;Acc:E1BQD2]	5	UP
ENSGALT00000011296	91.1147	17.5822	2.37356	0.0716633	chr6	20638214	20680433	BLNK	B-cell_linker	5	UP
ENSGALT00000023751	80.8771	13.6751	2.56418	0.0717792	chrZ	18112316	18254795	PDE4D	phosphodiesterase_4D,_cAMP-specific_[Source:HGNC_Symbol;Acc:8783]	5	UP
ENSGALT00000013608	138.208	38.0948	1.85917	0.0718718	chr15	12591776	12644802	TPCN1	two_pore_segment_channel_1	5	UP
ENSGALT00000006226	46.0692	2.93037	3.97465	0.0722009	chr18	7268440	7278915	CACNG5	Uncharacterized_protein_[Source:UniProtKB/TrEMBL;Acc:E1C4A6]	5	UP
ENSGALT00000024297	66.5444	8.79112	2.9202	0.0731631	chr3	65985389	66029579	C6ORF186	C6ORF186	5	UP
ENSGALT00000039303	128.994	34.1877	1.91575	0.0736016	chr9	19387993	19398093	LRRC31	leucine_rich_repeat_containing_31	5	UP
ENSGALT00000019473	286.653	115.261	1.3144	0.0748842	chr2	44326507	44408536	TRAK1	trafficking_protein,_kinesin_binding_1	5	UP
ENSGALT00000043235	78.8296	13.6751	2.52719	0.0787056	chr18	7577908	7590495	CACNG5	Uncharacterized_protein_[Source:UniProtKB/TrEMBL;Acc:E1C4A6]	5	UP
ENSGALT00000042741	133.089	37.1181	1.8422	0.0788724	chr21	4392908	4410627	CROCC	ciliary_rootlet_coiled-coil,_rootletin	5	UP
ENSGALT00000002939	80.8771	14.6519	2.46465	0.0805094	chrZ	8359918	8368975	KIAA1045	KIAA1045	5	UP
ENSGALT00000014609	80.8771	14.6519	2.46465	0.0805094	chr6	27267817	27285089	COL9A3	collagen,_type_IX,_alpha_3	5	UP
ENSGALT00000027383	104.424	24.4198	2.09633	0.0808735	chr1	162755379	162839627	PCDH17	Protocadherin_17	5	UP
ENSGALT00000039674	69.6157	10.7447	2.69579	0.0834317	chr6	20638838	20730717	BLNK	B-cell_linker	5	UP
ENSGALT00000033591	266.178	107.447	1.30876	0.0836503	chr9	4276668	4282108	ING5	inhibitor_of_growth_family,_member_5	5	UP
ENSGALT00000038940	107.495	26.3734	2.02711	0.0848836	chr20	12373218	12375053	C20H20ORF108	transmembrane_protein_C20orf108_homolog_[Source:RefSeq_peptide;Acc:NP_001026664]	5	UP
ENSGALT00000037978	76.782	13.6751	2.48922	0.0862631	chr7	26676886	26859021	MYLK	myosin,_light_chain_kinase	5	UP
ENSGALT00000003964	269.249	110.377	1.2865	0.0871233	chr17	7609612	7627804	OLFM1	olfactomedin_1	5	UP
ENSGALT00000025925	151.517	47.8628	1.6625	0.0876841	chr4	89229751	89236422	SMYD5	SMYD_family_member_5	5	UP
ENSGALT00000016498	38.9029	1.95358	4.31568	0.0878829	chr1	35865661	36009723	PTPRR	Protein_tyrosine_phosphatase,_receptor_type,_R	5	UP
ENSGALT00000024108	82.9246	16.6054	2.32014	0.0910026	chrZ	23920723	23944460	ANKRD31	ankyrin_repeat_domain_31	5	UP
ENSGALT00000044916	53.2355	5.86075	3.18323	0.0914273	-	-	-	-	-	5	UP
ENSGALT00000024713	168.92	57.6307	1.55144	0.091786	chr3	67134085	67243457	SOBP	sine_oculis_binding_protein_homolog_(Drosophila)	5	UP
ENSGALT00000024407	115.685	31.2573	1.88794	0.0922668	chr2	103913221	103977131	KCTD1	potassium_channel_tetramerisation_domain_containing_1	5	UP
ENSGALT00000015206	195.538	72.2825	1.43573	0.0942857	chr5	25717338	25740411	ZFYVE1	zinc_finger,_FYVE_domain_containing_1	5	UP
ENSGALT00000019926	202.705	76.1897	1.41171	0.0944814	chr5	56257303	56323004	SAMD4A	sterile_alpha_motif_domain_containing_4A	5	UP
ENSGALT00000043255	189.396	69.3522	1.44939	0.0957282	chr1	98700853	98720026	C1H21ORF91	protein_EURL_[Source:RefSeq_peptide;Acc:NP_990068]	5	UP
ENSGALT00000004363	240.584	97.6791	1.30042	0.0969804	chr7	2280809	2296210	FRZB	frizzled-related_protein	5	UP
ENSGALT00000026798	107.495	28.3269	1.92402	0.0983956	chr3	105019504	105046269	EFR3B	EFR3_homolog_B_(S._cerevisiae)	5	UP
ENSGALT00000043791	90.0909	20.5126	2.13487	0.0988624	chr15	7488964	7521455	MN1	meningioma_(disrupted_in_balanced_translocation)_1_[Source:HGNC_Symbol;Acc:7180]	5	UP
ENSGALT00000001411	60.4019	8.79112	2.78047	0.100369	chr24	289699	292570	ESAM	endothelial_cell_adhesion_molecule	5	UP
ENSGALT00000040590	84.9721	18.559	2.19487	0.101229	chr6	11543129	11545869	CHST3	carbohydrate_(chondroitin_6)_sulfotransferase_3	5	UP
ENSGALT00000040293	57.3306	7.81433	2.87511	0.101735	chr3	2120795	2165960	-	-	5	UP
ENSGALT00000040569	237.512	97.6791	1.28188	0.102822	chr17	1662	38146	-	-	5	UP
ENSGALT00000043951	51.188	5.86075	3.12665	0.102853	chrZ	56064525	56093305	MARCH3	membrane-associated_ring_finger_(C3HC4)_3	5	UP
ENSGALT00000046217	139.231	44.9324	1.63166	0.104872	-	-	-	HMGA1	high_mobility_group_AT-hook_1	5	UP
ENSGALT00000003296	111.59	31.2573	1.83594	0.105433	chrZ	70595581	70609625	TSTD2	thiosulfate_sulfurtransferase_(rhodanese)-like_domain_containing_2_[Source:HGNC_Symbol;Acc:30087]	5	UP
ENSGALT00000013501	164.825	58.6075	1.49178	0.106377	chr5	22607036	22687521	LRP4	low_density_lipoprotein_receptor-related_protein_4	5	UP
ENSGALT00000005593	44.0217	3.90716	3.49402	0.106652	chr20	3984241	3994990	SGK2	serum/glucocorticoid_regulated_kinase_2	5	UP
ENSGALT00000025196	210.895	84.004	1.32799	0.107371	chrZ	62345173	62437996	HAPLN1	hyaluronan_and_proteoglycan_link_protein_1	5	UP
ENSGALT00000010368	228.299	93.7719	1.28369	0.107406	chr13	15085599	15133192	PHF15	PHD_finger_protein_15	5	UP
ENSGALT00000038754	251.845	107.447	1.22891	0.108474	chr17	8989403	9014494	-	-	5	UP
ENSGALT00000018810	53.2355	6.83754	2.96084	0.108559	chr3	42463950	42626252	PDE10A	phosphodiesterase_10A	5	UP
ENSGALT00000024226	96.2335	24.4198	1.97849	0.108645	chr3	65391999	65429033	FYN	FYN_oncogene_related_to_SRC,_FGR,_YES	5	UP
ENSGALT00000021937	39.9267	2.93037	3.7682	0.109884	chr25	64083	79652	PLEKHO1	pleckstrin_homology_domain_containing,_family_O_member_1	5	UP
ENSGALT00000011326	39.9267	2.93037	3.7682	0.109884	chr9	12153803	12156739	APOD	apolipoprotein_D	5	UP
ENSGALT00000045226	35.8316	1.95358	4.19704	0.110288	chr3	109447789	109456799	TDRD6	tudor_domain_containing_6	5	UP
ENSGALT00000013444	35.8316	1.95358	4.19704	0.110288	chr12	17814859	18073537	FAR-1	FAR-1_protein;_Uncharacterized_protein_[Source:UniProtKB/TrEMBL;Acc:Q90842]	5	UP
ENSGALT00000016548	88.0434	21.4894	2.03459	0.116061	chrZ	26531632	26586078	RFX3	regulatory_factor_X,_3_(influences_HLA_class_II_expression)_[Source:HGNC_Symbol;Acc:9984]	5	UP
ENSGALT00000043332	194.514	77.1665	1.33383	0.117109	-	-	-	-	-	5	UP
ENSGALT00000026381	76.782	16.6054	2.20911	0.117303	chr3	90624219	91037359	DLGAP2	discs,_large_(Drosophila)_homolog-associated_protein_2	5	UP
ENSGALT00000026884	34.8079	1.95358	4.15522	0.11892	chr1	127871297	127881303	GYG2	glycogenin_2	5	UP
ENSGALT00000046104	226.251	95.7255	1.24095	0.119318	chrZ	8953620	8966661	NPR2	natriuretic_peptide_receptor_B/guanylate_cyclase_B_(atrionatriuretic_peptide_receptor_B)_[Source:HGNC_Symbol;Acc:7944]	5	UP
ENSGALT00000042807	109.542	32.2341	1.76483	0.120041	chr5	57972416	57974448	GNG2	Guanine_nucleotide_binding_protein_(G_protein),_gamma_2	5	UP
ENSGALT00000022367	84.9721	20.5126	2.05048	0.120181	chr1	436356	454771	DENND6B	DENN/MADD_domain_containing_6B_[Source:HGNC_Symbol;Acc:32690]	5	UP
ENSGALT00000010598	101.352	28.3269	1.83913	0.121007	chr15	8378112	8403920	GGT1	gamma-glutamyltransferase_1	5	UP
ENSGALT00000045547	93.1622	24.4198	1.93169	0.121192	chr2	120538763	120541690	HEY1	hairy/enhancer-of-split_related_with_YRPW_motif_1	5	UP
ENSGALT00000043170	73.7108	15.6287	2.23768	0.12126	chr13	9528622	9529772	MXD3	MAX_dimerization_protein_3_[Source:HGNC_Symbol;Acc:14008]	5	UP
ENSGALT00000005109	125.923	41.0252	1.61795	0.123282	chr18	6282873	6369966	RAB11FIP4	RAB11_family_interacting_protein_4_(class_II)	5	UP
ENSGALT00000027194	158.683	58.6075	1.43699	0.123608	chr1	137992923	137995864	IRS2	insulin_receptor_substrate_2	5	UP
ENSGALT00000037259	29.6891	0.976791	4.92574	0.12362	chr1	74338878	74476749	VWF	von_Willebrand_factor	5	UP
ENSGALT00000041093	68.592	13.6751	2.32649	0.123895	chr23	2626798	2627923	TMEM200B	Uncharacterized_protein_[Source:UniProtKB/TrEMBL;Acc:E1BQX9]	5	UP
ENSGALT00000045343	170.968	65.445	1.38537	0.123919	chr1	7160121	7169485	FAM107B	Family_with_sequence_similarity_107,_member_B	5	UP
ENSGALT00000037435	142.303	49.8163	1.51427	0.124131	chr2	51294121	51492490	GLI3	GLI-Kruppel_family_member_GLI3_(Greig_cephalopolysyndactyly_syndrome)	5	UP
ENSGALT00000016007	154.588	56.6539	1.44818	0.125208	chr7	18171746	18181640	BBS5	Bardet-Biedl_syndrome_5	5	UP
ENSGALT00000019136	90.0909	23.443	1.94223	0.125613	chr7	26674969	26805324	MYLK	myosin,_light_chain_kinase	5	UP
ENSGALT00000045484	214.99	90.8416	1.24284	0.125889	chr7	34511198	34526274	RND3	Rho_family_GTPase_3	5	UP
ENSGALT00000020162	195.538	80.0969	1.28763	0.127805	chr5	57768772	57784079	ATL1	Uncharacterized_protein_[Source:UniProtKB/TrEMBL;Acc:F1NAM6]	5	UP
ENSGALT00000006809	50.1643	6.83754	2.87511	0.128346	chr14	3222764	3232769	LFNG	LFNG_O-fucosylpeptide_3-beta-N-acetylglucosaminyltransferase	5	UP
ENSGALT00000007382	50.1643	6.83754	2.87511	0.128346	chr21	5645769	5657774	DRAXIN	Draxin_[Source:UniProtKB/Swiss-Prot;Acc:B6ZI38]	5	UP
ENSGALT00000033106	78.8296	18.559	2.08662	0.128991	chr6	26590485	26762219	TCF7L2	transcription_factor_7-like_2_(T-cell_specific,_HMG-box)	5	UP
ENSGALT00000014436	78.8296	18.559	2.08662	0.128991	chr6	26590521	26762220	TCF7L2	transcription_factor_7-like_2_(T-cell_specific,_HMG-box)	5	UP
ENSGALT00000019753	158.683	59.5843	1.41314	0.129025	chr2	46963798	47228581	ELMO1	engulfment_and_cell_motility_1	5	UP
ENSGALT00000025267	127.97	42.9788	1.57411	0.129263	chrZ	65896891	65938677	PTBP3	polypyrimidine_tract_binding_protein_3_[Source:HGNC_Symbol;Acc:10253]	5	UP
ENSGALT00000007757	28.6653	0.976791	4.87511	0.134445	chr8	8198958	8401728	FAM5C	family_with_sequence_similarity_5,_member_C	5	UP
ENSGALT00000021615	28.6653	0.976791	4.87511	0.134445	chr25	494217	508583	BCAN	brevican	5	UP
ENSGALT00000024358	36.8554	2.93037	3.65272	0.13523	chrZ	32830910	32921578	SH3GL2	SH3-domain_GRB2-like_2	5	UP
ENSGALT00000005647	210.895	90.8416	1.2151	0.136312	chr18	6886921	6916604	SMURF2	SMAD_specific_E3_ubiquitin_protein_ligase_2	5	UP
ENSGALT00000003729	70.6395	15.6287	2.17628	0.13779	chr19	4828082	4843179	-	-	5	UP
ENSGALT00000003883	93.1622	26.3734	1.82066	0.139454	chr15	2711272	2726169	MMP17	matrix_metallopeptidase_17_(membrane-inserted)	5	UP
ENSGALT00000007104	56.3068	9.76791	2.52719	0.140149	chr18	9295297	9337253	SDK2	sidekick_homolog_2	5	UP
ENSGALT00000044125	102.376	31.2573	1.71161	0.14172	chr14	13169099	13176128	METRN	meteorin,_glial_cell_differentiation_regulator	5	UP
ENSGALT00000001612	154.588	59.5843	1.37542	0.142321	chr24	412583	417125	TIRAP	Toll-interleukin_1_receptor_(TIR)_domain_containing_adaptor_protein	5	UP
ENSGALT00000018785	143.326	53.7235	1.41568	0.145176	chr5	50234280	50253829	TRMT61A	Uncharacterized_protein_[Source:UniProtKB/TrEMBL;Acc:F1NZ19]	5	UP
ENSGALT00000045453	81.9008	21.4894	1.93025	0.145707	chr13	9685098	9687474	GPRIN1	G_protein_regulated_inducer_of_neurite_outgrowth_1	5	UP
ENSGALT00000044480	27.6415	0.976791	4.82264	0.146194	chr15	5789346	5790438	B3GNT4	UDP-GlcNAc:betaGal_beta-1,3-N-acetylglucosaminyltransferase_4_[Source:HGNC_Symbol;Acc:15683]	5	UP
ENSGALT00000004006	38.9029	3.90716	3.31568	0.14731	chr8	3555675	3558786	RGS2	regulator_of_G-protein_signaling_2,_24kDa	5	UP
ENSGALT00000046055	95.2097	28.3269	1.74893	0.148368	chr14	8694207	8700862	CDR2	cerebellar_degeneration-related_protein_2,_62kDa	5	UP
ENSGALT00000004226	31.7366	1.95358	4.02195	0.148906	chr17	7156508	7189561	BRD3	bromodomain_containing_3	5	UP
ENSGALT00000000210	66.5444	14.6519	2.18323	0.149108	chr26	1012133	1019461	DENND2D	DENN/MADD_domain_containing_2D	5	UP
ENSGALT00000014014	91.1147	26.3734	1.7886	0.149493	chr5	50331640	50371943	-	-	5	UP
ENSGALT00000040572	155.612	61.5378	1.3384	0.150683	chr23	5485392	5489141	MYCL1	Uncharacterized_protein_[Source:UniProtKB/TrEMBL;Acc:F1NXY9]	5	UP
ENSGALT00000012765	118.756	41.0252	1.53342	0.151086	chr3	1831201	1886847	BCL11A	B-cell_CLL/lymphoma_11A_(zinc_finger_protein)	5	UP
ENSGALT00000006771	47.093	6.83754	2.78396	0.151488	chr6	10506235	10517767	TSPAN15	tetraspanin_15	5	UP
ENSGALT00000020198	47.093	6.83754	2.78396	0.151488	chr5	57866099	57897874	TRIM9	tripartite_motif-containing_9	5	UP
ENSGALT00000013169	47.093	6.83754	2.78396	0.151488	chr7	9822435	9943072	PLCL1	phospholipase_C-like_1	5	UP
ENSGALT00000025349	34.8079	2.93037	3.57026	0.15513	chr1	98864911	98893667	CHODL	chondrolectin	5	UP
ENSGALT00000004047	34.8079	2.93037	3.57026	0.15513	chr13	1309825	1324899	ARAP3	ArfGAP_with_RhoGAP_domain,_ankyrin_repeat_and_PH_domain_3_[Source:HGNC_Symbol;Acc:24097]	5	UP
ENSGALT00000027149	162.778	66.4218	1.29318	0.155278	chr1	136345768	136476626	RASA3	RAS_p21_protein_activator_3	5	UP
ENSGALT00000043136	101.352	32.2341	1.65272	0.155293	-	-	-	CRLF1	cytokine_receptor-like_factor_1_[Source:HGNC_Symbol;Acc:2364]	5	UP
ENSGALT00000010508	117.732	41.0252	1.52093	0.155499	chr13	15352638	15367400	VDAC1	voltage-dependent_anion_channel_1	5	UP
ENSGALT00000001781	170.968	71.3057	1.26164	0.155927	chr26	2628624	2639856	C4BPA	complement_component_4_binding_protein,_alpha	5	UP
ENSGALT00000042988	91.1147	27.3501	1.73613	0.159459	chr15	12572528	12579566	SDSL	serine_dehydratase-like	5	UP
ENSGALT00000002195	46.0692	6.83754	2.75225	0.160032	chr23	2715390	2762791	PTPRU	protein_tyrosine_phosphatase,_receptor_type,_U	5	UP
ENSGALT00000037161	107.495	36.1413	1.57255	0.161083	chr4	83556987	83615658	FAM53A	family_with_sequence_similarity_53,_member_A	5	UP
ENSGALT00000033111	42.9979	5.86075	2.87511	0.163538	chr7	21327980	21363749	PLA2R1	phospholipase_A2_receptor_1,_180kDa	5	UP
ENSGALT00000043868	164.825	69.3522	1.24893	0.165803	chrZ	44617582	44658144	CDC42SE2	CDC42_small_effector_2	5	UP
ENSGALT00000039936	57.3306	11.7215	2.29015	0.166529	chr19	4945235	4952988	ASL1	argininosuccinate_lyase	5	UP
ENSGALT00000011035	79.8533	22.4662	1.8296	0.168653	chr10	13454716	13456486	KLHL25	kelch-like_25_(Drosophila)	5	UP
ENSGALT00000027882	77.8058	21.4894	1.85625	0.169198	chr1	188266497	188275287	RAB30	RAB30,_member_RAS_oncogene_family	5	UP
ENSGALT00000010637	119.78	43.9556	1.44627	0.170075	chr15	8407586	8421516	FAM211B	Uncharacterized_protein_[Source:UniProtKB/TrEMBL;Acc:E1BUD5]	5	UP
ENSGALT00000020544	52.2118	9.76791	2.41825	0.170647	chrZ	39667817	39812156	FRMD3	FERM_domain_containing_3	5	UP
ENSGALT00000004915	84.9721	25.3966	1.74236	0.172499	chr13	9441051	9446948	RGS14	regulator_of_G-protein_signalling_14	5	UP
ENSGALT00000040625	25.594	0.976791	4.71161	0.172763	chr26	1435025	1436588	KCNA3	potassium_voltage-gated_channel,_shaker-related_subfamily,_member_3	5	UP
ENSGALT00000017082	25.594	0.976791	4.71161	0.172763	chr6	34398116	34408511	DPYSL4	dihydropyrimidinase-like_4	5	UP
ENSGALT00000040327	82.9246	24.4198	1.76375	0.173363	chr26	2599567	2605277	CR1L	complement_component_(3b/4b)_receptor_1-like	5	UP
ENSGALT00000015766	32.7603	2.93037	3.48279	0.177788	chr3	20175603	20250749	KCNK2	Potassium_channel,_subfamily_K,_member_2	5	UP
ENSGALT00000044605	35.8316	3.90716	3.19704	0.178335	-	-	-	-	-	5	UP
ENSGALT00000039677	44.0217	6.83754	2.68667	0.178479	chr8	5688262	5763125	CACNA1E	calcium_channel,_voltage-dependent,_R_type,_alpha_1E_subunit	5	UP
NM_001142848	50.482	6.7945	2.89333	0.180922	chr21	5645770	5657774	C21H1ORF187	C21H1ORF187	5	UP
ENSGALT00000036824	46.0692	7.81433	2.55961	0.182584	chr1	97647317	97650579	-	-	5	UP
ENSGALT00000045016	46.0692	7.81433	2.55961	0.182584	chr18	10867249	10883572	CDR2L	cerebellar_degeneration-related_protein_2-like	5	UP
ENSGALT00000012303	46.0692	7.81433	2.55961	0.182584	chr4	11728002	11826335	ARHGEF9	Cdc42_guanine_nucleotide_exchange_factor_(GEF)_9	5	UP
ENSGALT00000022336	101.352	35.1645	1.52719	0.183199	chr2	93602165	93685718	RTTN	rotatin	5	UP
ENSGALT00000024324	40.9504	5.86075	2.80472	0.18326	chrZ	33889452	34000379	MLLT3	myeloid/lymphoid_or_mixed-lineage_leukemia_(trithorax_homolog,_Drosophila);_translocated_to,_3	5	UP
ENSGALT00000040496	57.3306	12.6983	2.17467	0.183586	chr27	2764309	2769010	LIMD2	LIM_domain_containing_2	5	UP
ENSGALT00000007780	57.3306	12.6983	2.17467	0.183586	chr20	7082080	7177518	PHACTR3	phosphatase_and_actin_regulator_3	5	UP
ENSGALT00000006388	121.827	46.886	1.37761	0.184704	chr15	5432307	5444715	CAMKK2	calcium/calmodulin-dependent_protein_kinase_kinase_2,_beta	5	UP
ENSGALT00000009205	82.9246	25.3966	1.70717	0.184879	chr12	9012887	9036163	CELSR3	cadherin,_EGF_LAG_seven-pass_G-type_receptor_3_(flamingo_homolog,_Drosophila)	5	UP
ENSGALT00000022955	28.6653	1.95358	3.87511	0.186069	chr4	66374738	66404130	ATP10D	ATPase,_class_V,_type_10D	5	UP
ENSGALT00000025747	28.6653	1.95358	3.87511	0.186069	chr4	87924321	87944779	SMOX	spermine_oxidase	5	UP
ENSGALT00000025340	154.588	66.4218	1.2187	0.186378	chr4	83538376	83605614	FAM53A	family_with_sequence_similarity_53,_member_A	5	UP
ENSGALT00000040657	42.9979	6.83754	2.65272	0.188424	chr22	2478969	2479900	C8ORF4	C8ORF4	5	UP
ENSGALT00000025694	74.7345	21.4894	1.79815	0.189039	chr3	81337237	81638081	RIMS1	regulating_synaptic_membrane_exocytosis_1	5	UP
ENSGALT00000045751	139.231	57.6307	1.27258	0.189158	chr2	17424992	17525132	PIP4K2A	phosphatidylinositol-5-phosphate_4-kinase,_type_II,_alpha	5	UP
ENSGALT00000024867	150.493	64.4682	1.22303	0.189925	chr2	111004142	111017846	SDR16C5	short_chain_dehydrogenase/reductase_family_16C,_member_5	5	UP
ENSGALT00000012606	89.0672	29.3037	1.60381	0.192215	chr12	15895825	16091944	FOXP1	forkhead_box_P1	5	UP
ENSGALT00000024516	84.9721	27.3501	1.63544	0.195175	chr2	106579833	106707763	ASXL3	additional_sex_combs_like_3_(Drosophila)	5	UP
ENSGALT00000020476	47.093	8.79112	2.42139	0.19526	chr7	35234889	35264450	KCNJ3	potassium_inwardly-rectifying_channel,_subfamily_J,_member_3	5	UP
ENSGALT00000026439	69.6157	19.5358	1.83329	0.198092	chr2	137459620	137462113	ZHX2	zinc_fingers_and_homeoboxes_2	5	UP
ENSGALT00000007849	76.782	23.443	1.71161	0.200829	chr11	10168413	10216329	KCTD15	potassium_channel_tetramerisation_domain_containing_15	5	UP
ENSGALT00000000580	57.3306	13.6751	2.06776	0.200913	chr21	12255	26547	IGSF21	immunoglobin_superfamily,_member_21	5	UP
ENSGALT00000002162	124.899	50.7931	1.29805	0.202511	chr17	8490012	8608978	DAB2IP	DAB2_interacting_protein	5	UP
ENSGALT00000005352	23.5465	0.976791	4.59132	0.203978	chr5	29439523	29623554	RYR3	ryanodine_receptor_3	5	UP
ENSGALT00000022165	23.5465	0.976791	4.59132	0.203978	chr2	90153585	90209672	FAM65B	protein_FAM65B_[Source:RefSeq_peptide;Acc:NP_001012883]	5	UP
ENSGALT00000004469	100.329	37.1181	1.43454	0.208781	chr13	8184041	8248330	SH3PXD2B	SH3_and_PX_domains_2B	5	UP
ENSGALT00000045562	40.9504	6.83754	2.58233	0.209863	chr13	1217193	1247116	PCDHGC3	protocadherin_gamma-C3_precursor_[Source:RefSeq_peptide;Acc:NP_999839]	5	UP
ENSGALT00000015970	80.8771	26.3734	1.61665	0.210351	chr3	21271703	21291025	TMEM206	Uncharacterized_protein_[Source:UniProtKB/TrEMBL;Acc:E1C5B3]	5	UP
ENSGALT00000002335	115.685	46.886	1.30297	0.216501	chr20	949501	968946	-	-	5	UP
ENSGALT00000040113	95.2097	35.1645	1.43699	0.219349	chr10	1107486	1118370	CELF6	Uncharacterized_protein_[Source:UniProtKB/TrEMBL;Acc:F1P5J4]	5	UP
ENSGALT00000017675	131.041	56.6539	1.20978	0.220805	chr5	44411262	44508014	UNC79	unc-79_homolog_(C._elegans)_[Source:HGNC_Symbol;Acc:19966]	5	UP
ENSGALT00000006859	101.352	39.0716	1.37518	0.223035	chr5	1461627	1495209	SYT12	synaptotagmin_XII	5	UP
ENSGALT00000046167	112.614	45.9092	1.29453	0.224655	chr26	2627128	2638488	C4BPA	complement_component_4_binding_protein,_alpha	5	UP
ENSGALT00000010526	102.376	40.0484	1.35406	0.226984	chr13	15562923	15746366	FSTL4	follistatin-like_4	5	UP
ENSGALT00000040043	102.376	40.0484	1.35406	0.226984	chr13	15562923	15746366	FSTL4	follistatin-like_4	5	UP
ENSGALT00000041075	95.2097	36.1413	1.39746	0.230264	chr24	442596	449861	ST3GAL4	ST3_beta-galactoside_alpha-2,3-sialyltransferase_4	5	UP
ENSGALT00000012268	90.0909	33.2109	1.43973	0.230752	chr2	16147742	16180423	GAD2	Glutamate_decarboxylase_2_(pancreatic_islets_and_brain,_65kDa)	5	UP
NM_204268	133.932	55.3267	1.27545	0.231137	chr7	41461	59273	NAB1	NGFI-A_binding_protein_1_(EGR1_binding_protein_1)	5	UP
ENSGALT00000037928	63.4731	18.559	1.77403	0.231955	chr4	48984183	48996527	-	-	5	UP
ENSGALT00000018520	28.6653	2.93037	3.29015	0.232747	chr8	28066596	28149459	NEGR1	neuronal_growth_regulator_1	5	UP
ENSGALT00000043370	28.6653	2.93037	3.29015	0.232747	chr11	766211	773374	CX3CL1	chemokine_(C-X3-C_motif)_ligand_1	5	UP
ENSGALT00000020386	70.6395	22.4662	1.65272	0.233159	chr5	15411216	15475247	-	-	5	UP
ENSGALT00000002584	101.352	40.0484	1.33956	0.233426	chr13	6690007	6822834	GABRB2	gamma-aminobutyric_acid_(GABA)_A_receptor,_beta_2	5	UP
ENSGALT00000019591	38.9029	6.83754	2.50833	0.233516	chr4	54423626	54470738	PRSS12	protease,_serine,_12_(neurotrypsin,_motopsin)	5	UP
ENSGALT00000044995	57.3306	15.6287	1.87511	0.236267	chr3	94613863	94661730	RNF144A	ring_finger_protein_144A	5	UP
ENSGALT00000020749	40.9504	7.81433	2.38968	0.236275	chr17	5864356	5873610	NCS1	Neuronal_calcium_sensor_1_[Source:UniProtKB/Swiss-Prot;Acc:P62167]	5	UP
ENSGALT00000021859	73.7108	24.4198	1.59383	0.237058	chr2	89091627	89098413	MSANTD3	Myb/SANT-like_DNA-binding_domain_containing_3_[Source:HGNC_Symbol;Acc:23370]	5	UP
ENSGALT00000014876	33.7841	4.88395	2.79022	0.237158	chr1	24245070	24320202	CORTBP2	cortactin_binding_protein_2_[Source:RefSeq_peptide;Acc:NP_001092009]	5	UP
ENSGALT00000015948	108.519	44.9324	1.27211	0.239488	chr5	31253450	31438936	ATPBD4	ATP_binding_domain_4	5	UP
ENSGALT00000026880	47.093	10.7447	2.13189	0.23952	chr1	127828156	127842611	ARSD	arylsulfatase_D	5	UP
ENSGALT00000010093	21.499	0.976791	4.46007	0.240574	-	-	-	ASIC1	Acid-sensing_ion_channel_1_[Source:UniProtKB/Swiss-Prot;Acc:Q1XA76]	5	UP
ENSGALT00000039862	81.9008	29.3037	1.48279	0.240718	chr13	16624522	16626069	RNF14	ring_finger_protein_14	5	UP
ENSGALT00000036102	90.0909	34.1877	1.3979	0.2424	-	-	-	-	-	5	UP
ENSGALT00000000967	30.7128	3.90716	2.97465	0.243941	chr26	2031383	2040291	KLHDC8A	kelch_domain_containing_8A	5	UP
ENSGALT00000018624	30.7128	3.90716	2.97465	0.243941	chr4	48706785	48712370	SPINK2	serine_peptidase_inhibitor,_Kazal_type_2_(acrosin-trypsin_inhibitor)_[Source:HGNC_Symbol;Acc:11245]	5	UP
ENSGALT00000011809	72.687	24.4198	1.57365	0.245298	chr13	16549131	16550501	RNF14	ring_finger_protein_14	5	UP
ENSGALT00000029590	54.2593	14.6519	1.88879	0.24743	chr3	3296281	3297536	-	-	5	UP
ENSGALT00000001016	27.6415	2.93037	3.23768	0.248768	chr23	1402268	1407058	GBP7	guanylate_binding_protein_7	5	UP
ENSGALT00000016214	27.6415	2.93037	3.23768	0.248768	chr4	30627024	30633032	MMAA	methylmalonic_aciduria_(cobalamin_deficiency)_cblA_type	5	UP
ENSGALT00000016289	50.1643	12.6983	1.98203	0.249679	chr5	35253579	35299381	BAZ1A	bromodomain_adjacent_to_zinc_finger_domain,_1A	5	UP
ENSGALT00000014184	87.0196	33.2109	1.38968	0.252601	chr3	4603330	4605274	FLRT3	fibronectin_leucine_rich_transmembrane_protein_3	5	UP
ENSGALT00000026967	76.782	27.3501	1.48922	0.254009	chr3	109423489	109444248	CYP39A1	cytochrome_P450,_family_39,_subfamily_A,_polypeptide_1	5	UP
NM_001245037	40.1795	5.82386	2.78641	0.257355	chr13	1131211	1247116	PCDHGA2	protocadherin_gamma_subfamily_A,_2	5	UP
ENSGALT00000042979	62.4494	19.5358	1.67657	0.257489	chr20	10522750	10558193	C20orf112	chromosome_20_open_reading_frame_112_[Source:HGNC_Symbol;Acc:16106]	5	UP
ENSGALT00000002573	53.2355	14.6519	1.86131	0.257817	chr27	4124275	4139879	FBXL20	F-box_and_leucine-rich_repeat_protein_20	5	UP
ENSGALT00000045091	20.4752	0.976791	4.38968	0.261143	chr1	6492587	6533393	CCDC3	coiled-coil_domain_containing_3	5	UP
ENSGALT00000027924	20.4752	0.976791	4.38968	0.261143	chr1	74339089	74476640	VWF	von_Willebrand_factor	5	UP
ENSGALT00000027946	20.4752	0.976791	4.38968	0.261143	chr1	72902805	73148067	FAR2	fatty_acyl_CoA_reductase_2_[Source:HGNC_Symbol;Acc:25531]	5	UP
ENSGALT00000007124	58.3543	17.5822	1.73072	0.262169	chr11	7859153	7860637	PLEKHF1	pleckstrin_homology_domain_containing,_family_F_(with_FYVE_domain)_member_1	5	UP
ENSGALT00000027995	70.6395	24.4198	1.53242	0.262545	chr1	194561125	194668318	FAM168A	Uncharacterized_protein_[Source:UniProtKB/TrEMBL;Acc:E1C589]	5	UP
ENSGALT00000007816	73.7108	26.3734	1.48279	0.265402	-	-	-	-	-	5	UP
ENSGALT00000020003	68.592	23.443	1.54888	0.265441	chr5	26586980	26631624	MAP3K9	mitogen-activated_protein_kinase_kinase_kinase_9	5	UP
ENSGALT00000044642	99.3048	42.002	1.2414	0.268819	chr25	185580	186678	-	-	5	UP
ENSGALT00000000303	50.1643	13.6751	1.87511	0.270465	chr26	897285	901876	MGAT4C	mannosyl_(alpha-1,3-)-glycoprotein_beta-1,4-N-acetylglucosaminyltransferase,_isozyme_C_(putative)	5	UP
ENSGALT00000003708	33.7841	5.86075	2.52719	0.270852	chr14	14983211	15045881	DNAH3	dynein,_axonemal,_heavy_chain_3	5	UP
ENSGALT00000045861	100.329	42.9788	1.22303	0.272711	chr18	7288257	7319923	-	-	5	UP
ENSGALT00000019385	77.8058	29.3037	1.40879	0.273091	chr4	53335688	53350682	BBS7	Bardet-Biedl_syndrome_7_[Source:HGNC_Symbol;Acc:18758]	5	UP
NM_001044638	121.569	52.4147	1.21373	0.27417	chr1	49318356	49323041	CENPM	centromere_protein_M	5	UP
ENSGALT00000020338	28.6653	3.90716	2.87511	0.275917	chr2	55011806	55031149	IGFBP3	insulin-like_growth_factor_binding_protein_3	5	UP
ENSGALT00000019900	83.9484	33.2109	1.33785	0.276264	chr2	48407676	48552792	BBS9	Bardet-Biedl_syndrome_9	5	UP
ENSGALT00000009454	75.7583	28.3269	1.41923	0.27644	chr4	2841454	2877012	LRCH2	leucine-rich_repeats_and_calponin_homology_(CH)_domain_containing_2	5	UP
ENSGALT00000043564	51.188	14.6519	1.80472	0.279762	chr2	113137210	113469039	NKAIN3	Uncharacterized_protein_[Source:UniProtKB/TrEMBL;Acc:F1NR51]	5	UP
ENSGALT00000039399	19.4514	0.976791	4.31568	0.283368	chr6	22075464	22082376	-	-	5	UP
ENSGALT00000045244	25.594	2.93037	3.12665	0.2839	chr18	10703908	10709349	RAB37	RAB37,_member_RAS_oncogene_family_[Source:HGNC_Symbol;Acc:30268]	5	UP
ENSGALT00000007787	52.2118	15.6287	1.74018	0.28863	chr21	6404533	6425874	CCDC30	Coiled-coil_domain_containing_30	5	UP
ENSGALT00000007982	87.0196	36.1413	1.26769	0.290081	chr6	12928845	13365226	KCNMA1	potassium_large_conductance_calcium-activated_channel,_subfamily_M,_alpha_member_1	5	UP
ENSGALT00000044526	90.0909	38.0948	1.24179	0.290664	chr6	12928845	13365708	KCNMA1	potassium_large_conductance_calcium-activated_channel,_subfamily_M,_alpha_member_1	5	UP
ENSGALT00000043921	57.3306	18.559	1.62718	0.2907	chr1	47824918	47833585	PDE6H	phosphodiesterase_6H,_cGMP-specific,_cone,_gamma	5	UP
ENSGALT00000016038	50.1643	14.6519	1.77558	0.291344	chr3	21605814	21621949	TRAF-5	TNF_receptor-associated_factor_5_[Source:RefSeq_peptide;Acc:NP_989550]	5	UP
ENSGALT00000005813	46.0692	12.6983	1.85917	0.296388	chr18	7346781	7385554	-	-	5	UP
ENSGALT00000027731	46.0692	12.6983	1.85917	0.296388	chr1	179756095	179782290	ELMOD1	ELMO/CED-12_domain_containing_1	5	UP
ENSGALT00000002379	46.0692	12.6983	1.85917	0.296388	chr17	8319162	8342836	C5	complement_component_5	5	UP
ENSGALT00000007703	79.8533	32.2341	1.30876	0.296998	chr19	6934344	6939891	FAM57A	Family_with_sequence_similarity_57,_member_A	5	UP
ENSGALT00000040502	85.9959	36.1413	1.25062	0.298443	chr6	12928165	13365096	KCNMA1	potassium_large_conductance_calcium-activated_channel,_subfamily_M,_alpha_member_1	5	UP
ENSGALT00000040499	89.0672	38.0948	1.2253	0.29885	chr6	12928845	13365708	KCNMA1	potassium_large_conductance_calcium-activated_channel,_subfamily_M,_alpha_member_1	5	UP
ENSGALT00000042935	89.0672	38.0948	1.2253	0.29885	chr6	12928845	13365708	KCNMA1	potassium_large_conductance_calcium-activated_channel,_subfamily_M,_alpha_member_1	5	UP
ENSGALT00000045763	89.0672	38.0948	1.2253	0.29885	chr6	12928845	13365708	KCNMA1	potassium_large_conductance_calcium-activated_channel,_subfamily_M,_alpha_member_1	5	UP
ENSGALT00000008909	41.9742	10.7447	1.96588	0.300604	chr4	2300721	2316252	NLGN3	neuroligin_3	5	UP
ENSGALT00000044677	41.9742	10.7447	1.96588	0.300604	chr4	2300721	2316252	NLGN3	neuroligin_3	5	UP
ENSGALT00000045324	41.9742	10.7447	1.96588	0.300604	chr4	2300721	2316252	NLGN3	neuroligin_3	5	UP
ENSGALT00000046038	61.4256	21.4894	1.51522	0.301509	-	-	-	-	-	5	UP
ENSGALT00000008081	56.3068	18.559	1.60119	0.301675	chr12	5245422	5557230	IQSEC1	IQ_motif_and_Sec7_domain_1	5	UP
ENSGALT00000044023	31.7366	5.86075	2.43699	0.302069	-	-	-	DPYSL5	dihydropyrimidinase-like_5_[Source:HGNC_Symbol;Acc:20637]	5	UP
ENSGALT00000040107	39.9267	9.76791	2.03123	0.302224	chr1	3559594	3595000	PRKCQ	protein_kinase_C,_theta_[Source:HGNC_Symbol;Acc:9410]	5	UP
ENSGALT00000045392	69.6157	26.3734	1.40033	0.302285	chr27	4963811	4965610	COASY	Coenzyme_A_synthase	5	UP
ENSGALT00000016263	24.5703	2.93037	3.06776	0.303116	chr4	31349184	31378701	EDNRA	endothelin_receptor_type_A	5	UP
ENSGALT00000013983	24.5703	2.93037	3.06776	0.303116	chr7	12068536	12069589	GPR1	G_protein-coupled_receptor_1	5	UP
ENSGALT00000002198	24.5703	2.93037	3.06776	0.303116	chr13	7204673	7251075	FABP6	fatty_acid_binding_protein_6,_ileal_(gastrotropin)	5	UP
NM_001098539	33.9981	4.85322	2.80844	0.305977	chr1	24245071	24320202	CTTNBP2	cortactin_binding_protein_2	5	UP
ENSGALT00000039333	18.4277	0.976791	4.23768	0.307364	chr18	1970605	1985502	-	-	5	UP
ENSGALT00000011717	21.499	1.95358	3.46007	0.309638	chr4	9882091	9884936	SLITRK4	SLIT_and_NTRK-like_family,_member_4	5	UP
ENSGALT00000042948	21.499	1.95358	3.46007	0.309638	-	-	-	SDR9C7	short_chain_dehydrogenase/reductase_family_9C,_member_7_[Source:HGNC_Symbol;Acc:29958]	5	UP
ENSGALT00000020231	79.8533	33.2109	1.2657	0.310829	chr3	47607406	47658949	PPP1R14C	protein_phosphatase_1,_regulatory_(inhibitor)_subunit_14C	5	UP
ENSGALT00000039235	26.6178	3.90716	2.7682	0.311656	chr20	10700367	10707694	KIAA1755	KIAA1755_[Source:HGNC_Symbol;Acc:29372]	5	UP
NM_204770	71.0869	24.2661	1.55064	0.312355	chr3	3295225	3298004	FOXA2	forkhead_box_A2	5	UP
ENSGALT00000019349	28.6653	4.88395	2.55318	0.316449	chr5	53769481	53815142	SYT16	synaptotagmin_XVI	5	UP
ENSGALT00000044510	66.5444	25.3966	1.38968	0.316479	chr9	13396641	13405921	CLDN16	claudin_16	5	UP
NM_001040467	21.6351	0.970643	4.47829	0.3181	chrLGE22C19W28_E50C23	307167	321959	ACCN2	amiloride-sensitive_cation_channel_2,_neuronal	5	UP
NR_036657	66.9659	22.3248	1.58478	0.319846	chr14	14229409	14235974	C14H16orf59	C14H16orf59	5	UP
ENSGALT00000002721	76.782	32.2341	1.25218	0.324599	chr14	14312671	14384225	MAPK8IP3	mitogen-activated_protein_kinase_8_interacting_protein_3	5	UP
ENSGALT00000022526	79.8533	34.1877	1.22388	0.324802	chr10	7158296	7164937	MNS1	meiosis-specific_nuclear_structural_1_[Source:HGNC_Symbol;Acc:29636]	5	UP
ENSGALT00000015954	37.8791	9.76791	1.95528	0.331362	chr4	28846110	28920597	MAML3	mastermind-like_3_(Drosophila)	5	UP
ENSGALT00000044647	45.0455	13.6751	1.71983	0.332527	chr28	1455326	1459014	NMRK2	nicotinamide_riboside_kinase_2_[Source:HGNC_Symbol;Acc:17871]	5	UP
ENSGALT00000003152	17.4039	0.976791	4.15522	0.333246	chr14	14687363	14697992	GPRC5B	G_protein-coupled_receptor,_family_C,_group_5,_member_B	5	UP
ENSGALT00000017733	27.6415	4.88395	2.50072	0.334904	chr7	18442946	18552421	LASS6	LAG1_homolog,_ceramide_synthase_6	5	UP
ENSGALT00000044942	73.7108	31.2573	1.23768	0.339209	chr4	1830441	1832824	SHROOM4	shroom_family_member_4_[Source:HGNC_Symbol;Acc:29215]	5	UP
ENSGALT00000022808	51.188	17.5822	1.54169	0.341468	chr1	68151530	68167635	TM7SF3	Transmembrane_7_superfamily_member_3	5	UP
ENSGALT00000021554	22.5227	2.93037	2.94223	0.345118	chr2	86624613	86631727	IRX2	iroquois_homeobox_2	5	UP
ENSGALT00000044283	44.0217	13.6751	1.68667	0.346336	chr18	7035024	7073712	-	-	5	UP
ENSGALT00000005445	44.0217	13.6751	1.68667	0.346336	chr6	8867265	8879479	ADAM8	ADAM_metallopeptidase_domain_8	5	UP
NM_204219	50.482	14.5597	1.79379	0.350245	chr3	21605815	21621949	TRAF5	TNF_receptor-associated_factor_5	5	UP
ENSGALT00000020801	47.093	15.6287	1.59132	0.350973	chr2	63163419	63197929	NEDD9	neural_precursor_cell_expressed,_developmentally_down-regulated_9	5	UP
ENSGALT00000014987	55.2831	20.5126	1.43033	0.351508	chr14	14229286	14235980	C16orf59	chromosome_16_open_reading_frame_59	5	UP
ENSGALT00000027462	55.2831	20.5126	1.43033	0.351508	chr1	168132349	168158284	RCBTB2	regulator_of_chromosome_condensation_(RCC1)_and_BTB_(POZ)_domain_containing_protein_2	5	UP
ENSGALT00000042939	32.7603	7.81433	2.06776	0.352273	chrZ	20	138234	TCF4 (TCF7L2)	transcription_factor_4_[Source:HGNC_Symbol;Acc:11634]	5	UP
ENSGALT00000014942	58.3543	22.4662	1.37708	0.353053	chr7	14935827	14977668	OSBPL6	oxysterol_binding_protein-like_6	5	UP
ENSGALT00000002671	16.3802	0.976791	4.06776	0.361135	chr18	4139173	4184210	MGAT5B	mannosyl_(alpha-1,6-)-glycoprotein_beta-1,6-N-acetyl-glucosaminyltransferase,_isozyme_B	5	UP
NM_001030881	72.1171	28.1487	1.35728	0.361578	chr21	4418875	4422651	ATP13A2	ATPase_type_13A2	5	UP
ENSGALT00000043620	69.6157	30.2805	1.20102	0.365452	chr9	14372524	14376751	TCTEX1D2	Tctex1_domain_containing_2	5	UP
ENSGALT00000017629	31.7366	7.81433	2.02195	0.369833	chr4	43882836	43954986	VEGFC	vascular_endothelial_growth_factor_C	5	UP
ENSGALT00000044740	67.5682	29.3037	1.20526	0.371225	chr5	24424420	24430668	JMJD7	jmjC_domain-containing_protein_7_[Source:RefSeq_peptide;Acc:NP_001108131]	5	UP
ENSGALT00000011918	64.4969	27.3501	1.23768	0.371655	chr18	10370915	10376965	WFIKKN2	WAP,_follistatin/kazal,_immunoglobulin,_kunitz_and_netrin_domain_containing_2	5	UP
ENSGALT00000025048	64.4969	27.3501	1.23768	0.371655	chr2	115030392	115080545	CSPP1	centrosome_and_spindle_pole_associated_protein_1	5	UP
ENSGALT00000009323	61.4256	25.3966	1.27421	0.371789	chrZ	7442278	7470979	KIF24	kinesin_family_member_24	5	UP
ENSGALT00000024292	23.5465	3.90716	2.59132	0.373057	chrZ	28643719	28915973	PTPRD	protein_tyrosine_phosphatase,_receptor_type,_D	5	UP
ENSGALT00000007764	25.594	4.88395	2.38968	0.374691	chr14	4778982	4780829	RASD1	RAS,_dexamethasone-induced_1	5	UP
ENSGALT00000007121	36.8554	10.7447	1.77825	0.375055	chr8	6711186	6754418	ASTN1	astrotactin_1	5	UP
ENSGALT00000005940	41.9742	13.6751	1.61795	0.375451	chr13	10642121	10669352	ADAM19	ADAM_metallopeptidase_domain_19_(meltrin_beta)	5	UP
ENSGALT00000035534	65.5207	28.3269	1.20978	0.377171	-	-	-	-	-	5	UP
ENSGALT00000022425	34.8079	9.76791	1.83329	0.379672	chr3	53248976	53250435	CITED2	Cbp/p300-interacting_transactivator,_with_Glu/Asp-rich_carboxy-terminal_domain,_2	5	UP
ENSGALT00000025144	39.9267	12.6983	1.65272	0.380871	chr3	73318963	73462488	EPHA7	EPH_receptor_A7	5	UP
ENSGALT00000027951	48.1167	17.5822	1.45242	0.381382	chr1	72499750	72510484	KLHDC5	kelch_domain_containing_5	5	UP
ENSGALT00000018703	18.4277	1.95358	3.23768	0.382856	chr3	41958445	42114412	RPS6KA2	Ribosomal_protein_S6_kinase,_90kDa,_polypeptide_2	5	UP
ENSGALT00000009430	18.4277	1.95358	3.23768	0.382856	chr6	17210805	17295313	MARCH8	membrane-associated_ring_finger_(C3HC4)_8	5	UP
ENSGALT00000001401	18.4277	1.95358	3.23768	0.382856	chr13	961552	967753	HBEGF	heparin-binding_EGF-like_growth_factor	5	UP
ENSGALT00000008851	18.4277	1.95358	3.23768	0.382856	chr2	3930887	3953861	KIF9	kinesin_family_member_9	5	UP
ENSGALT00000015804	18.4277	1.95358	3.23768	0.382856	-	-	-	SRCIN1	SRC_kinase_signaling_inhibitor_1_[Source:HGNC_Symbol;Acc:29506]	5	UP
ENSGALT00000043239	18.4277	1.95358	3.23768	0.382856	-	-	-	AEBP1	AE_binding_protein_1_[Source:HGNC_Symbol;Acc:303]	5	UP
ENSGALT00000013363	63.4731	27.3501	1.2146	0.383297	chr15	11340778	11343535	TESC	tescalcin	5	UP
NM_204484	37.0888	8.73579	2.08597	0.384217	chr2	58974181	58974697	SOX4	SRY_(sex_determining_region_Y)-box_4	5	UP
ENSGALT00000015011	42.9979	14.6519	1.55318	0.384843	chr7	15181595	15183599	-	-	5	UP
ENSGALT00000010862	37.8791	11.7215	1.69225	0.386308	chr24	3827577	3838515	OAF	OAF_homolog_(Drosophila)	5	UP
ENSGALT00000003915	37.8791	11.7215	1.69225	0.386308	chr14	15077347	15085376	CRYM	crystallin,_mu	5	UP
ENSGALT00000036663	37.8791	11.7215	1.69225	0.386308	chr2	118186851	118223238	CRISPLD1	cysteine-rich_secretory_protein_LCCL_domain_containing_1	5	UP
ENSGALT00000007174	30.7128	7.81433	1.97465	0.388147	chr19	6575680	6578835	CENPV	Uncharacterized_protein_[Source:UniProtKB/TrEMBL;Acc:F1NQ58]	5	UP
ENSGALT00000037204	40.9504	13.6751	1.58233	0.390782	chr5	58079775	58085946	GPR137C	G_protein-coupled_receptor_137C	5	UP
ENSGALT00000013295	15.3564	0.976791	3.97465	0.391147	chr15	11287022	11315239	NOS1	nitric_oxide_synthase_1_(neuronal)	5	UP
ENSGALT00000001493	15.3564	0.976791	3.97465	0.391147	chr11	457681	471120	CNGB1	cyclic_nucleotide_gated_channel_beta_1	5	UP
ENSGALT00000036752	20.4752	2.93037	2.80472	0.392245	chr2	110878687	110899609	-	-	5	UP
ENSGALT00000036036	20.4752	2.93037	2.80472	0.392245	-	-	-	-	-	5	UP
ENSGALT00000013206	26.6178	5.86075	2.18323	0.3945	chr3	2490869	2608930	EML6	echinoderm_microtubule_associated_protein_like_6_[Source:HGNC_Symbol;Acc:35412]	5	UP
ENSGALT00000042815	22.5227	3.90716	2.52719	0.395773	chr19	6073433	6077568	ANKRD13B	ankyrin_repeat_domain_13B_[Source:HGNC_Symbol;Acc:26363]	5	UP
ENSGALT00000007427	24.5703	4.88395	2.33079	0.396091	chr21	5721499	5736965	DISP3	patched_domain-containing_protein_2_[Source:RefSeq_peptide;Acc:NP_001186105]	5	UP
ENSGALT00000018407	24.5703	4.88395	2.33079	0.396091	chr2	36832211	36992407	ZNF385D	Uncharacterized_protein_[Source:UniProtKB/TrEMBL;Acc:E1BRE3]	5	UP
ENSGALT00000011353	51.188	20.5126	1.3193	0.403614	chr18	9819300	9824829	SLC26A11	Solute_carrier_family_26,_member_11	5	UP
ENSGALT00000039557	39.9267	13.6751	1.5458	0.406645	chr6	21789161	21793861	HPS1	Hermansky-Pudlak_syndrome_1	5	UP
ENSGALT00000004272	42.9979	15.6287	1.46007	0.408931	chr10	2330706	2332566	LINGO1	leucine_rich_repeat_and_Ig_domain_containing_1	5	UP
ENSGALT00000045208	34.8079	10.7447	1.69579	0.409029	chr5	32124252	32252521	NOVA1	Neuro-oncological_ventral_antigen_1	5	UP
ENSGALT00000005483	34.8079	10.7447	1.69579	0.409029	chr26	5028662	5038433	USP49	ubiquitin_specific_peptidase_49	5	UP
ENSGALT00000023866	34.8079	10.7447	1.69579	0.409029	chr8	20334388	20385736	PIK3R3	Phosphoinositide-3-kinase,_regulatory_subunit_3_(p55,_gamma)	5	UP
ENSGALT00000020184	52.2118	21.4894	1.28075	0.410416	chr7	30263670	30266354	CXCR4	chemokine_(C-X-C_motif)_receptor_4	5	UP
ENSGALT00000008080	17.4039	1.95358	3.15522	0.410504	chr4	2076338	2079410	-	-	5	UP
ENSGALT00000045014	17.4039	1.95358	3.15522	0.410504	chr28	899422	901661	ADMP	anti-dorsalizing_morphogenetic_protein	5	UP
ENSGALT00000026441	17.4039	1.95358	3.15522	0.410504	chr1	118627849	118816669	CNKSR2	connector_enhancer_of_kinase_suppressor_of_Ras_2	5	UP
ENSGALT00000018671	27.6415	6.83754	2.01529	0.411788	chr5	50069527	50119038	-	-	5	UP
ENSGALT00000044028	32.7603	9.76791	1.74583	0.415156	-	-	-	TMEM35	transmembrane_protein_35	5	UP
ENSGALT00000045823	25.594	5.86075	2.12665	0.415687	-	-	-	MAPK8IP2	mitogen-activated_protein_kinase_8_interacting_protein_2_[Source:HGNC_Symbol;Acc:6883]	5	UP
ENSGALT00000036353	56.3068	24.4198	1.20526	0.415894	chr1	195086449	195120846	PGM2L1	phosphoglucomutase_2-like_1	5	UP
ENSGALT00000028633	50.1643	20.5126	1.29015	0.417621	chr3	87768166	87768495	7SK	7SK_RNA_[Source:RFAM;Acc:RF00100]	5	UP
ENSGALT00000043787	47.093	18.559	1.34339	0.417784	chrZ	54924134	54941918	TMEM38B	transmembrane_protein_38B	5	UP
ENSGALT00000002244	19.4514	2.93037	2.73072	0.417864	chr13	16213205	16217341	IRF1	interferon_regulatory_factor_1	5	UP
ENSGALT00000046207	19.4514	2.93037	2.73072	0.417864	chr6	18233410	18252163	DRGX	dorsal_root_ganglia_homeobox	5	UP
ENSGALT00000043838	23.5465	4.88395	2.26939	0.418543	chr23	1930453	1936866	MAP3K6	mitogen-activated_protein_kinase_kinase_kinase_6_[Source:HGNC_Symbol;Acc:6858]	5	UP
ENSGALT00000008837	21.499	3.90716	2.46007	0.419683	chr12	8588012	8590092	HESX1	HESX_homeobox_1	5	UP
ENSGALT00000017732	14.3326	0.976791	3.87511	0.423401	chr2	30202574	30240482	-	-	5	UP
ENSGALT00000042626	14.3326	0.976791	3.87511	0.423401	chr20	9598822	9610812	OPRL1	Opiate_receptor-like_1	5	UP
NM_001282395	49.4517	17.4716	1.50101	0.423912	chr7	15181605	15184108	TTC30A	tetratricopeptide_repeat_domain_30A	5	UP
ENSGALT00000024940	28.6653	7.81433	1.87511	0.427126	chr1	91431222	91441019	CD101	CD101_molecule_[Source:HGNC_Symbol;Acc:5949]	5	UP
ENSGALT00000044646	28.6653	7.81433	1.87511	0.427126	chr3	110190487	110259846	FAM176A	Uncharacterized_protein_[Source:UniProtKB/TrEMBL;Acc:F1NEX1]	5	UP
ENSGALT00000043348	26.6178	6.83754	1.96084	0.43274	chr12	6621761	6639866	C9orf89	Chromosome_9_open_reading_frame_89	5	UP
ENSGALT00000016368	26.6178	6.83754	1.96084	0.43274	chr3	28453896	28478662	KCNK17	potassium_channel,_subfamily_K,_member_17	5	UP
ENSGALT00000014571	26.6178	6.83754	1.96084	0.43274	chr3	8583545	8598351	KCNK12	potassium_channel,_subfamily_K,_member_12_[Source:HGNC_Symbol;Acc:6274]	5	UP
ENSGALT00000028198	24.5703	5.86075	2.06776	0.437843	-	-	-	-	-	5	UP
ENSGALT00000027126	34.8079	11.7215	1.57026	0.437908	chr1	135008220	135053400	ST6GAL2	ST6_beta-galactosamide_alpha-2,6-sialyltranferase_2	5	UP
ENSGALT00000013521	34.8079	11.7215	1.57026	0.437908	chr7	10924384	10932701	CASP10	caspase_10,_apoptosis-related_cysteine_peptidase	5	UP
ENSGALT00000024170	34.8079	11.7215	1.57026	0.437908	chrZ	23306376	23314107	F2R	coagulation_factor_II_(thrombin)_receptor	5	UP
ENSGALT00000002828	50.1643	21.4894	1.22303	0.438711	chr19	4115481	4124260	SH2B2	SH2B_adaptor_protein_2	5	UP
ENSGALT00000034973	16.3802	1.95358	3.06776	0.439894	chr23	5435505	5440414	HEYL	hairy/enhancer-of-split_related_with_YRPW_motif-like_[Source:HGNC_Symbol;Acc:4882]	5	UP
ENSGALT00000016441	47.093	19.5358	1.26939	0.439978	chr8	19633055	19635948	TMEM53	transmembrane_protein_53	5	UP
ENSGALT00000018446	40.9504	15.6287	1.38968	0.440841	chr7	21670393	21673766	DES	desmin_[Source:HGNC_Symbol;Acc:2770]	5	UP
ENSGALT00000013616	22.5227	4.88395	2.20526	0.442079	chr3	3267109	3268759	THBD	thrombomodulin	5	UP
ENSGALT00000000064	20.4752	3.90716	2.38968	0.444828	chr1	49449953	49454326	CSDC2	Cold_shock_domain_containing_C2,_RNA_binding	5	UP
ENSGALT00000008025	20.4752	3.90716	2.38968	0.444828	chr10	9870131	9896086	SHC4	SHC_(Src_homology_2_domain_containing)_family,_member_4	5	UP
ENSGALT00000013051	18.4277	2.93037	2.65272	0.444924	chr10	18699924	18729841	CORO2B	coronin,_actin_binding_protein,_2B	5	UP
ENSGALT00000024669	18.4277	2.93037	2.65272	0.444924	chrZ	51161497	51174131	RGMB	RGM_domain_family,_member_B	5	UP
ENSGALT00000011323	18.4277	2.93037	2.65272	0.444924	chr20	10917367	10921453	MMP9	matrix_metallopeptidase_9_(gelatinase_B,_92kDa_gelatinase,_92kDa_type_IV_collagenase)	5	UP
ENSGALT00000021555	18.4277	2.93037	2.65272	0.444924	chr2	87131470	87135061	IRX1	iroquois_homeobox_1	5	UP
ENSGALT00000020785	18.4277	2.93037	2.65272	0.444924	chr2	62756870	62762088	EDN1	endothelin_1	5	UP
ENSGALT00000045865	18.4277	2.93037	2.65272	0.444924	chr13	9646659	9652888	HK3	hexokinase_3_(white_cell)_[Source:HGNC_Symbol;Acc:4925]	5	UP
ENSGALT00000012566	32.7603	10.7447	1.60832	0.445594	chr24	5684173	5705399	PHLDB1	pleckstrin_homology-like_domain,_family_B,_member_1	5	UP
ENSGALT00000045281	35.8316	12.6983	1.4966	0.448066	chr5	32124252	32252521	NOVA1	Neuro-oncological_ventral_antigen_1	5	UP
ENSGALT00000039068	45.0455	18.559	1.27926	0.448209	chr2	4003121	4008985	NACAD	NAC_alpha_domain_containing	5	UP
ENSGALT00000045316	41.9742	16.6054	1.33785	0.449004	chr5	28175233	28186584	-	-	5	UP
ENSGALT00000041073	41.9742	16.6054	1.33785	0.449004	chr24	451347	687741	KIRREL3	kin_of_IRRE_like_3_(Drosophila)	5	UP
ENSGALT00000036571	38.9029	14.6519	1.40879	0.449054	chr1	135007543	135029750	ST6GAL2	ST6_beta-galactosamide_alpha-2,6-sialyltranferase_2	5	UP
ENSGALT00000000816	25.594	6.83754	1.90426	0.454593	chr27	2829226	2834424	MYL4	myosin,_light_chain_4,_alkali;_atrial,_embryonic	5	UP
ENSGALT00000035722	33.7841	11.7215	1.52719	0.456356	-	-	-	-	-	5	UP
ENSGALT00000014861	42.9979	17.5822	1.29015	0.456745	chr4	18002210	18005242	-	-	5	UP
ENSGALT00000009725	39.9267	15.6287	1.35316	0.457566	chr9	4388902	4408558	SNED1	sushi,_nidogen_and_EGF-like_domains_1	5	UP
ENSGALT00000011564	13.3089	0.976791	3.7682	0.458008	chr2	13816139	13922505	NRP1	neuropilin_1	5	UP
ENSGALT00000015828	13.3089	0.976791	3.7682	0.458008	chr5	29863999	29890748	SCG5	secretogranin_V_(7B2_protein)	5	UP
ENSGALT00000000344	31.7366	10.7447	1.56252	0.464886	chrZ	47205111	47225715	PJA2	praja_ring_finger_2	5	UP
ENSGALT00000043948	21.499	4.88395	2.13815	0.466732	chr7	14695976	14885623	-	-	5	UP
ENSGALT00000039079	21.499	4.88395	2.13815	0.466732	chr6	25366992	25408947	MXI1	MAX_interactor_1	5	UP
ENSGALT00000021014	21.499	4.88395	2.13815	0.466732	chr2	67926746	68013683	BCL2	B-cell_CLL/lymphoma_2	5	UP
ENSGALT00000013926	21.499	4.88395	2.13815	0.466732	chr7	11891290	11900217	MDH1B	malate_dehydrogenase_1B,_NAD_(soluble)	5	UP
NM_001199176	24.7259	4.85322	2.34901	0.467643	chr21	5721500	5736965	PTCHD2	patched_domain_containing_2	5	UP
ENSGALT00000034504	15.3564	1.95358	2.97465	0.471094	chr13	12167685	12188663	GLRA1	glycine_receptor,_alpha_1_(startle_disease/hyperekplexia)	5	UP
ENSGALT00000016309	19.4514	3.90716	2.31568	0.471247	chr4	32207745	32286859	DCLK2	doublecortin-like_kinase_2	5	UP
ENSGALT00000045977	17.4039	2.93037	2.57026	0.473473	chr26	2658421	2659570	-	-	5	UP
ENSGALT00000003184	17.4039	2.93037	2.57026	0.473473	chr6	2241233	2243572	GPRIN2	G_protein_regulated_inducer_of_neurite_outgrowth_2	5	UP
ENSGALT00000025689	17.4039	2.93037	2.57026	0.473473	chr2	125632567	125659384	TMEM67	transmembrane_protein_67	5	UP
ENSGALT00000008903	29.6891	9.76791	1.60381	0.473651	chr9	4744220	4774365	ST6GAL1	ST6_beta-galactosamide_alpha-2,6-sialyltranferase_1	5	UP
ENSGALT00000017909	29.6891	9.76791	1.60381	0.473651	chr8	26748610	26762766	EFCAB7	EF-hand_calcium_binding_domain_7_[Source:HGNC_Symbol;Acc:29379]	5	UP
ENSGALT00000045578	38.9029	15.6287	1.31568	0.474817	chr5	28175838	28186584	-	-	5	UP
ENSGALT00000031277	38.9029	15.6287	1.31568	0.474817	chr2	6203236	6221340	WDR86	WD_repeat_domain_86	5	UP
ENSGALT00000015652	36.8554	14.6519	1.33079	0.484398	chr6	30933713	30948725	-	-	5	UP
ENSGALT00000044015	36.8554	14.6519	1.33079	0.484398	chr1	137993700	137994702	-	-	5	UP
ENSGALT00000043497	22.5227	5.86075	1.94223	0.485171	chr1	193846442	193847042	RHOG	ras_homolog_gene_family,_member_G_(rho_G)	5	UP
NM_001044645	50.482	21.3542	1.24125	0.48955	chr28	891165	894523	CD320	CD320	5	UP
ENSGALT00000026001	25.594	7.81433	1.71161	0.491801	chr2	148019430	148043870	RHPN1	rhophilin,_Rho_GTPase_binding_protein_1	5	UP
ENSGALT00000036826	12.2851	0.976791	3.65272	0.49507	chr1	96613959	96650360	-	-	5	UP
ENSGALT00000018285	12.2851	0.976791	3.65272	0.49507	chr8	27530030	27540509	IL23R	interleukin_23_receptor	5	UP
ENSGALT00000006211	12.2851	0.976791	3.65272	0.49507	chr5	2204842	2231619	SLC6A5	solute_carrier_family_6_(neurotransmitter_transporter,_glycine),_member_5	5	UP
ENSGALT00000032288	12.2851	0.976791	3.65272	0.49507	chr4	20085253	20097716	MAP9	microtubule-associated_protein_9	5	UP
ENSGALT00000040015	12.2851	0.976791	3.65272	0.49507	chr27	4647053	4655682	HAP1	huntingtin-associated_protein_1_[Source:HGNC_Symbol;Acc:4812]	5	UP
ENSGALT00000000222	31.7366	11.7215	1.43699	0.495207	chr16	76299	78554	DMB2	B_locus_M_beta_chain_2_precursor_[Source:RefSeq_peptide;Acc:NP_001128638]	5	UP
ENSGALT00000041214	31.7366	11.7215	1.43699	0.495207	chr16	76299	79327	DMB2	B_locus_M_beta_chain_2_precursor_[Source:RefSeq_peptide;Acc:NP_001128638]	5	UP
ENSGALT00000000323	18.4277	3.90716	2.23768	0.498976	chrZ	46356141	46521698	CAMK4	calcium/calmodulin-dependent_protein_kinase_IV	5	UP
ENSGALT00000012627	18.4277	3.90716	2.23768	0.498976	chr20	12598229	12633483	DOK5	docking_protein_5	5	UP
ENSGALT00000027326	18.4277	3.90716	2.23768	0.498976	chr1	150421564	150423643	SLITRK1	SLIT_and_NTRK-like_family,_member_1	5	UP
ENSGALT00000014950	38.9029	16.6054	1.22822	0.500349	chr5	25173301	25229389	TTBK2	tau_tubulin_kinase_2	5	UP
NM_001135786	45.3308	18.4422	1.29748	0.501016	chrUn_AADN03022870	476	1562	CDK5	cyclin-dependent_kinase_5	5	UP
ENSGALT00000016646	16.3802	2.93037	2.48279	0.503556	chr21	4871935	4875357	-	-	5	UP
ENSGALT00000018181	16.3802	2.93037	2.48279	0.503556	chr5	48046013	48063255	HHIPL1	HHIP-like_1_[Source:HGNC_Symbol;Acc:19710]	5	UP
ENSGALT00000000304	32.7603	12.6983	1.36732	0.504779	chr26	893410	898808	TMEM9	transmembrane_protein_9	5	UP
ENSGALT00000002054	29.6891	10.7447	1.46631	0.505571	chr23	2648579	2682303	-	-	5	UP
ENSGALT00000044048	29.6891	10.7447	1.46631	0.505571	chr6	12928845	13223413	KCNMA1	potassium_large_conductance_calcium-activated_channel,_subfamily_M,_alpha_member_1	5	UP
ENSGALT00000008267	29.6891	10.7447	1.46631	0.505571	-	-	-	FAM222A	family_with_sequence_similarity_222,_member_A_[Source:HGNC_Symbol;Acc:25915]	5	UP
ENSGALT00000036945	21.499	5.86075	1.87511	0.510396	chr1	82436524	82455764	KIAA1407	KIAA1407	5	UP
ENSGALT00000018327	33.7841	13.6751	1.3048	0.513688	chr2	34804926	34807738	DPH3	DPH3,_KTI11_homolog_(S._cerevisiae)	5	UP
ENSGALT00000015723	24.5703	7.81433	1.65272	0.515098	chr4	24691531	24707952	AADAT	aminoadipate_aminotransferase	5	UP
ENSGALT00000010866	19.4514	4.88395	1.99376	0.519512	chr5	14243983	14284324	MUC5B	mucin_5B,_oligomeric_mucus/gel-forming	5	UP
ENSGALT00000024747	19.4514	4.88395	1.99376	0.519512	chrZ	52440937	52454026	PCGF3	polycomb_group_ring_finger_3	5	UP
ENSGALT00000035951	19.4514	4.88395	1.99376	0.519512	chr5	399315	401347	TMEM216	Uncharacterized_protein_[Source:UniProtKB/TrEMBL;Acc:H9L2N0]	5	UP
ENSGALT00000010666	31.7366	12.6983	1.32151	0.524955	chr15	8434482	8440751	C22ORF13	C22ORF13	5	UP
ENSGALT00000044290	22.5227	6.83754	1.71983	0.525785	chr8	9810425	9819105	PTGS2	prostaglandin-endoperoxide_synthase_2_(prostaglandin_G/H_synthase_and_cyclooxygenase)	5	UP
ENSGALT00000008495	28.6653	10.7447	1.41568	0.526994	chr17	4872094	4874530	ST6GALNAC6	ST6_(alpha-N-acetyl-neuraminyl-2,3-beta-galactosyl-1,3)-N-acetylgalactosaminide_alpha-2,6-sialyltransferase_6	5	UP
ENSGALT00000014860	25.594	8.79112	1.54169	0.527598	chr4	17752826	17830120	MAMLD1	Uncharacterized_protein_[Source:UniProtKB/TrEMBL;Acc:E1BRL3]	5	UP
ENSGALT00000020872	17.4039	3.90716	2.15522	0.52805	chr1	55904114	56140985	TBXAS1	thromboxane_A_synthase_1_(platelet,_cytochrome_P450,_family_5,_subfamily_A)	5	UP
ENSGALT00000043015	17.4039	3.90716	2.15522	0.52805	chr20	11142956	11160478	EDN3	Endothelin_3;_Uncharacterized_protein_[Source:UniProtKB/TrEMBL;Acc:Q3MU75]	5	UP
ENSGALT00000012938	11.2614	0.976791	3.52719	0.534677	chr24	6243258	6247754	-	-	5	UP
ENSGALT00000045519	11.2614	0.976791	3.52719	0.534677	-	-	-	-	-	5	UP
ENSGALT00000045906	11.2614	0.976791	3.52719	0.534677	-	-	-	-	-	5	UP
ENSGALT00000045972	11.2614	0.976791	3.52719	0.534677	-	-	-	-	-	5	UP
ENSGALT00000012898	11.2614	0.976791	3.52719	0.534677	chr5	18812000	18817045	RAG2	recombination_activating_gene_2	5	UP
ENSGALT00000013590	11.2614	0.976791	3.52719	0.534677	chr12	19214896	19234835	LMCD1	LIM_and_cysteine-rich_domains_1	5	UP
ENSGALT00000018657	11.2614	0.976791	3.52719	0.534677	chr2	40385524	40447574	TGFBR2	transforming_growth_factor,_beta_receptor_II_(70/80kDa)	5	UP
ENSGALT00000021083	11.2614	0.976791	3.52719	0.534677	chr2	72176696	72272302	CDH10	cadherin_10,_type_2_(T2-cadherin)	5	UP
ENSGALT00000037415	11.2614	0.976791	3.52719	0.534677	chr5	52828564	52830355	AKAP5	A_kinase_(PRKA)_anchor_protein_5	5	UP
ENSGALT00000037334	11.2614	0.976791	3.52719	0.534677	chr2	57954206	58013848	DCDC2	doublecortin_domain_containing_2_[Source:HGNC_Symbol;Acc:18141]	5	UP
ENSGALT00000004418	15.3564	2.93037	2.38968	0.535214	chr26	4297633	4299448	SPDEF	SAM_pointed_domain_containing_ets_transcription_factor	5	UP
ENSGALT00000032418	15.3564	2.93037	2.38968	0.535214	chr4	1181325	1183490	CWNT11B	wingless-type_MMTV_integration_site_family,_member_11b_precursor_[Source:RefSeq_peptide;Acc:NP_001124216]	5	UP
ENSGALT00000023634	20.4752	5.86075	1.80472	0.536696	chrZ	57704975	57809334	KIAA0825	KIAA0825_[Source:HGNC_Symbol;Acc:28532]	5	UP
ENSGALT00000000499	13.3089	1.95358	2.7682	0.539159	chr27	1768087	1844661	ASIC2	acid-sensing_(proton-gated)_ion_channel_2_[Source:HGNC_Symbol;Acc:99]	5	UP
ENSGALT00000002445	23.5465	7.81433	1.59132	0.539298	chr18	3472434	3480495	C18H17ORF62	Uncharacterized_protein_[Source:UniProtKB/TrEMBL;Acc:E1BYV2]	5	UP
ENSGALT00000015817	23.5465	7.81433	1.59132	0.539298	chr6	31636706	31661235	FAM53B	family_with_sequence_similarity_53,_member_B_[Source:HGNC_Symbol;Acc:28968]	5	UP
ENSGALT00000000598	33.7841	14.6519	1.20526	0.54171	chr26	1381506	1383057	KCNA10	potassium_voltage-gated_channel,_shaker-related_subfamily,_member_10	5	UP
ENSGALT00000045814	33.7841	14.6519	1.20526	0.54171	chr1	72046585	72113670	DUSP16	dual_specificity_phosphatase_16	5	UP
ENSGALT00000044285	30.7128	12.6983	1.27421	0.545788	-	-	-	-	-	5	UP
NM_001130744	15.4537	1.94129	2.99286	0.546368	chr4	1181389	1183427	WNT11B	wingless-type_MMTV_integration_site_family,_member_11b	5	UP
ENSGALT00000043169	18.4277	4.88395	1.91575	0.547696	-	-	-	-	-	5	UP
ENSGALT00000044595	18.4277	4.88395	1.91575	0.547696	-	-	-	-	-	5	UP
ENSGALT00000003990	18.4277	4.88395	1.91575	0.547696	chr23	4398098	4400981	GJA4	gap_junction_protein,_alpha_4,_37kDa	5	UP
ENSGALT00000030136	18.4277	4.88395	1.91575	0.547696	chr1	168673887	168676904	KCNRG	potassium_channel_regulator	5	UP
ENSGALT00000002601	18.4277	4.88395	1.91575	0.547696	chr13	6621732	6646067	GABRA6	gamma-aminobutyric_acid_(GABA)_A_receptor,_alpha_6	5	UP
ENSGALT00000008125	27.6415	10.7447	1.36321	0.549156	chr8	9810889	9818836	PTGS2	prostaglandin-endoperoxide_synthase_2_(prostaglandin_G/H_synthase_and_cyclooxygenase)	5	UP
ENSGALT00000000792	27.6415	10.7447	1.36321	0.549156	chr26	397070	465917	LGR6	Uncharacterized_protein_[Source:UniProtKB/TrEMBL;Acc:F1NKM7]	5	UP
ENSGALT00000001863	24.5703	8.79112	1.48279	0.551341	chr24	1423052	1430887	-	-	5	UP
ENSGALT00000044753	24.5703	8.79112	1.48279	0.551341	-	-	-	ORMDL2	ORM1-like_2_(S._cerevisiae)	5	UP
ENSGALT00000020205	21.499	6.83754	1.65272	0.551469	chr5	57949662	57956993	FRMD6	FERM_domain_containing_6	5	UP
ENSGALT00000043904	31.7366	13.6751	1.2146	0.554175	chr2	75816853	75986888	FBXL7	F-box_and_leucine-rich_repeat_protein_7	5	UP
ENSGALT00000004201	31.7366	13.6751	1.2146	0.554175	chr8	3773061	3782255	OLFML2B	Olfactomedin-like_2B	5	UP
ENSGALT00000043548	16.3802	3.90716	2.06776	0.5585	chr4	10906726	10913244	PRRG3	proline_rich_Gla_(G-carboxyglutamic_acid)_3_(transmembrane)	5	UP
ENSGALT00000040985	16.3802	3.90716	2.06776	0.5585	-	-	-	PGPEP1	Pyroglutamyl-peptidase_I	5	UP
ENSGALT00000012719	25.594	9.76791	1.38968	0.562196	chr6	22598416	22602875	KAZALD1	Kazal-type_serine_peptidase_inhibitor_domain_1	5	UP
ENSGALT00000043121	19.4514	5.86075	1.73072	0.564094	chr19	5794726	5796856	PROCA1	protein_interacting_with_cyclin_A1_[Source:HGNC_Symbol;Acc:28600]	5	UP
ENSGALT00000004669	22.5227	7.81433	1.52719	0.564421	chr17	6972900	6991273	-	-	5	UP
ENSGALT00000005687	29.6891	12.6983	1.2253	0.567291	chr19	5646182	5651342	SARM1	sterile_alpha_and_TIR_motif_containing_1	5	UP
ENSGALT00000014132	29.6891	12.6983	1.2253	0.567291	chr4	16526479	16542420	SLC25A43	solute_carrier_family_25,_member_43	5	UP
ENSGALT00000015079	14.3326	2.93037	2.29015	0.568482	chr4	19803832	19811032	FGG	fibrinogen_gamma_chain	5	UP
ENSGALT00000003766	14.3326	2.93037	2.29015	0.568482	chr27	3252520	3267354	MPP3	membrane_protein,_palmitoylated_3_(MAGUK_p55_subfamily_member_3)	5	UP
ENSGALT00000013935	26.6178	10.7447	1.30876	0.572072	chr6	25367013	25409141	MXI1	MAX_interactor_1	5	UP
ENSGALT00000015298	26.6178	10.7447	1.30876	0.572072	chr3	17136649	17173601	SUSD4	sushi_domain_containing_4	5	UP
ENSGALT00000007513	23.5465	8.79112	1.42139	0.575947	chr4	48269	56854	ZC4H2	Uncharacterized_protein_[Source:UniProtKB/TrEMBL;Acc:E1BT97]	5	UP
ENSGALT00000039898	12.2851	1.95358	2.65272	0.57612	chr17	4882931	4891674	ENG	endoglin	5	UP
ENSGALT00000037826	12.2851	1.95358	2.65272	0.57612	chr7	32211978	32530918	ARHGAP15	Rho_GTPase_activating_protein_15	5	UP
ENSGALT00000043639	10.2376	0.976791	3.38968	0.576891	chr6	7974241	7992033	TMEM26	transmembrane_protein_26	5	UP
ENSGALT00000014236	10.2376	0.976791	3.38968	0.576891	chr2	20218012	20318200	ITGA8	integrin,_alpha_8	5	UP
ENSGALT00000037691	10.2376	0.976791	3.38968	0.576891	chr2	40385524	40447574	TGFBR2	transforming_growth_factor,_beta_receptor_II_(70/80kDa)	5	UP
ENSGALT00000007195	10.2376	0.976791	3.38968	0.576891	chr19	6592914	6602620	TRPV2	transient_receptor_potential_cation_channel,_subfamily_V,_member_2	5	UP
ENSGALT00000042836	10.2376	0.976791	3.38968	0.576891	chr1	121097001	121120392	GRPR	gastrin-releasing_peptide_receptor	5	UP
ENSGALT00000019151	10.2376	0.976791	3.38968	0.576891	chr5	52828564	52830355	AKAP5	A_kinase_(PRKA)_anchor_protein_5	5	UP
ENSGALT00000014637	10.2376	0.976791	3.38968	0.576891	chr3	8438923	8480335	FAM179A	family_with_sequence_similarity_179,_member_A_[Source:HGNC_Symbol;Acc:33715]	5	UP
ENSGALT00000023419	17.4039	4.88395	1.83329	0.577111	chr4	76182200	76201414	CD38	CD38_molecule	5	UP
ENSGALT00000027486	17.4039	4.88395	1.83329	0.577111	chr1	169341616	169350372	FAM124A	family_with_sequence_similarity_124A	5	UP
ENSGALT00000012727	20.4752	6.83754	1.58233	0.578165	chr7	9174694	9279054	DNAH7	dynein,_axonemal,_heavy_chain_7	5	UP
ENSGALT00000038214	20.4752	6.83754	1.58233	0.578165	chr4	39503733	39638110	ODZ3	odz,_odd_Oz/ten-m_homolog_3_(Drosophila)	5	UP
ENSGALT00000043014	20.4752	6.83754	1.58233	0.578165	chr4	39503733	39638107	ODZ3	odz,_odd_Oz/ten-m_homolog_3_(Drosophila)	5	UP
ENSGALT00000012450	20.4752	6.83754	1.58233	0.578165	chr2	16613395	16622552	ENKUR	Uncharacterized_protein_[Source:UniProtKB/TrEMBL;Acc:F1NU83]	5	UP
ENSGALT00000024109	24.5703	9.76791	1.33079	0.586325	chrZ	23891966	23909745	-	-	5	UP
ENSGALT00000044592	24.5703	9.76791	1.33079	0.586325	chr6	31565164	31594662	LHPP	phospholysine_phosphohistidine_inorganic_pyrophosphate_phosphatase	5	UP
ENSGALT00000021642	24.5703	9.76791	1.33079	0.586325	chr25	424855	433292	INSRR	insulin_receptor-related_receptor	5	UP
ENSGALT00000038924	21.499	7.81433	1.46007	0.590484	chr4	19209333	19210887	TLR2-2	toll-like_receptor_2	5	UP
ENSGALT00000006933	21.499	7.81433	1.46007	0.590484	chr4	1201824	1206371	P2RY4	Uncharacterized_protein_[Source:UniProtKB/TrEMBL;Acc:F1NVI2]	5	UP
NM_001081699	29.8771	11.6477	1.35899	0.590598	chr1	21614383	21626085	GPR37	G_protein-coupled_receptor_37_(endothelin_receptor_type_B-like)	5	UP
NM_001135166	29.8771	11.6477	1.35899	0.590598	chr16	76389	79324	BMA2	BMA2	5	UP
ENSGALT00000022344	25.594	10.7447	1.25218	0.595756	chr2	93737181	93981838	DOK6	Docking_protein_6	5	UP
ENSGALT00000043149	13.3089	2.93037	2.18323	0.603389	chr2	60775849	60790940	CD83	CD83_molecule	5	UP
ENSGALT00000024921	19.4514	6.83754	1.50833	0.605893	chr1	91188527	91198039	MAEL	maelstrom_homolog_(Drosophila)	5	UP
ENSGALT00000015455	16.3802	4.88395	1.74583	0.607781	chr5	28024056	28028770	TMEM229B	chromosome_14_open_reading_frame_83	5	UP
ENSGALT00000023286	16.3802	4.88395	1.74583	0.607781	chr1	76253582	76258549	CSTA	cystatin_A_(stefin_A)	5	UP
ENSGALT00000020154	16.3802	4.88395	1.74583	0.607781	chr7	30149348	30165520	LCT	Lactase	5	UP
ENSGALT00000001383	11.2614	1.95358	2.52719	0.615074	chr24	301427	304582	PANX3	pannexin_3	5	UP
ENSGALT00000006133	20.4752	7.81433	1.38968	0.617506	chr4	1703059	1742346	MID2	midline_2	5	UP
ENSGALT00000009874	20.4752	7.81433	1.38968	0.617506	chr10	11161976	11168245	FAM154B	family_with_sequence_similarity_154,_member_B_[Source:HGNC_Symbol;Acc:33727]	5	UP
ENSGALT00000017759	9.21384	0.976791	3.23768	0.621743	chr2	30995531	30998226	IL6	interleukin_6_(interferon,_beta_2)	5	UP
ENSGALT00000029074	9.21384	0.976791	3.23768	0.621743	chr13	10000420	10264193	EBF1	early_B-cell_factor_1	5	UP
ENSGALT00000045141	9.21384	0.976791	3.23768	0.621743	chr7	30928490	30961286	NXPH2	neurexophilin_2	5	UP
ENSGALT00000007640	9.21384	0.976791	3.23768	0.621743	-	-	-	FGR	feline_Gardner-Rasheed_sarcoma_viral_oncogene_homolog_[Source:HGNC_Symbol;Acc:3697]	5	UP
ENSGALT00000044039	9.21384	0.976791	3.23768	0.621743	-	-	-	ABHD8	abhydrolase_domain_containing_8_[Source:HGNC_Symbol;Acc:23759]	5	UP
ENSGALT00000040573	9.21384	0.976791	3.23768	0.621743	chr25	1767555	1768702	GGA.50183	Uncharacterized_protein_[Source:UniProtKB/TrEMBL;Acc:H9L3I8]	5	UP
ENSGALT00000022909	17.4039	5.86075	1.57026	0.622272	chr1	68652275	68664289	-	-	5	UP
ENSGALT00000033911	17.4039	5.86075	1.57026	0.622272	chr20	9692143	9695672	RGS19	regulator_of_G-protein_signalling_19	5	UP
ENSGALT00000017416	17.4039	5.86075	1.57026	0.622272	chr4	39505215	39814734	ODZ3	odz,_odd_Oz/ten-m_homolog_3_(Drosophila)	5	UP
ENSGALT00000010983	14.3326	3.90716	1.87511	0.62363	chr20	10761590	10764145	VSTM2L	V-set_and_transmembrane_domain_containing_2_like	5	UP
ENSGALT00000017844	18.4277	6.83754	1.43033	0.634672	chr4	45120868	45127901	-	-	5	UP
ENSGALT00000017146	15.3564	4.88395	1.65272	0.639726	chr8	22465370	22521965	ELAVL4	ELAV_(embryonic_lethal,_abnormal_vision,_Drosophila)-like_4_(Hu_antigen_D)	5	UP
ENSGALT00000027707	15.3564	4.88395	1.65272	0.639726	chr1	179144081	179145085	C11ORF87	Uncharacterized_protein_[Source:UniProtKB/TrEMBL;Acc:E1C0R1]	5	UP
ENSGALT00000020197	15.3564	4.88395	1.65272	0.639726	chr3	47425647	47442269	C3H6ORF72	uncharacterized_protein_C6orf72_homolog_precursor_[Source:RefSeq_peptide;Acc:NP_001186315]	5	UP
ENSGALT00000019883	15.3564	4.88395	1.65272	0.639726	chr7	29271239	29285815	LYPD1	Uncharacterized_protein_[Source:UniProtKB/TrEMBL;Acc:F1NEM6]	5	UP
ENSGALT00000023724	12.2851	2.93037	2.06776	0.639951	chrZ	16788590	16819233	DDX4	DEAD_(Asp-Glu-Ala-Asp)_box_polypeptide_4	5	UP
ENSGALT00000007041	12.2851	2.93037	2.06776	0.639951	chr21	5451977	5465671	TNFRSF1B	tumor_necrosis_factor_receptor_superfamily,_member_1B	5	UP
ENSGALT00000010717	12.2851	2.93037	2.06776	0.639951	chr1	7358545	7361773	C7ORF23	C7ORF23	5	UP
NM_001277553	10.3024	0.970643	3.4079	0.646787	chr14	5158286	5162152	GRAP	GRB2-related_adaptor_protein	5	UP
NR_003250	10.3024	0.970643	3.4079	0.646787	chr8	9997871	9999209	LOC768251/ hepatic amylase pseudogen	hepatic_amylase_pseudogene	5	UP
NM_001278047	18.5444	5.82386	1.67094	0.649384	chr2	23437718	23440251	GNG11	guanine_nucleotide_binding_protein_(G_protein),_gamma_11	5	UP
ENSGALT00000024449	16.3802	5.86075	1.48279	0.653092	chr1	82675888	82696983	BOC	Boc_homolog_(mouse)	5	UP
ENSGALT00000044471	16.3802	5.86075	1.48279	0.653092	chr6	15060197	15066917	PLAU	plasminogen_activator,_urokinase	5	UP
ENSGALT00000008157	16.3802	5.86075	1.48279	0.653092	chr6	15060278	15068452	PLAU	plasminogen_activator,_urokinase	5	UP
ENSGALT00000000273	20.4752	8.79112	1.21976	0.655115	chr22	413641	425903	RASSF2	Ras_association_(RalGDS/AF-6)_domain_family_member_2	5	UP
ENSGALT00000014241	10.2376	1.95358	2.38968	0.656026	chr5	24431805	24434906	-	-	5	UP
ENSGALT00000011148	10.2376	1.95358	2.38968	0.656026	chr10	13994579	14019205	ST8SIA2	ST8_alpha-N-acetyl-neuraminide_alpha-2,8-sialyltransferase_2	5	UP
ENSGALT00000008443	10.2376	1.95358	2.38968	0.656026	chr2	1722122	1826632	VIPR1	vasoactive_intestinal_peptide_receptor_1	5	UP
ENSGALT00000018105	10.2376	1.95358	2.38968	0.656026	chr8	27471547	27487186	WDR78	WD_repeat_domain_78	5	UP
ENSGALT00000045147	10.2376	1.95358	2.38968	0.656026	chr2	50690129	50702901	C7ORF10	C7ORF10	5	UP
ENSGALT00000017350	13.3089	3.90716	1.7682	0.658352	chr3	33669292	33956337	KIF26B	kinesin_family_member_26B	5	UP
ENSGALT00000040248	13.3089	3.90716	1.7682	0.658352	chr19	4253517	4255722	HSPB1	heat_shock_27kDa_protein_1	5	UP
ENSGALT00000039301	17.4039	6.83754	1.34786	0.664521	chr6	22612054	22617518	PDZD7	PDZ_domain_containing_7	5	UP
ENSGALT00000046078	8.19008	0.976791	3.06776	0.669217	chr2	1340182	1341193	-	-	5	UP
ENSGALT00000033221	8.19008	0.976791	3.06776	0.669217	chr8	18513213	18515085	-	-	5	UP
ENSGALT00000043711	8.19008	0.976791	3.06776	0.669217	chr6	20253582	20257076	HHEX	hematopoietically_expressed_homeobox	5	UP
ENSGALT00000007970	8.19008	0.976791	3.06776	0.669217	chr15	6610622	6628850	SVOP	SV2_related_protein_homolog_(rat)	5	UP
ENSGALT00000017248	8.19008	0.976791	3.06776	0.669217	chr5	42240384	42272204	KCNK10	potassium_channel,_subfamily_K,_member_10	5	UP
ENSGALT00000040479	8.19008	0.976791	3.06776	0.669217	chr17	513114	517276	C8G	Complement_component_8,_gamma_polypeptide	5	UP
ENSGALT00000044443	8.19008	0.976791	3.06776	0.669217	chr1	67102758	67111591	KCNJ8	potassium_inwardly-rectifying_channel,_subfamily_J,_member_8	5	UP
ENSGALT00000015288	8.19008	0.976791	3.06776	0.669217	chr3	17046057	17074149	CAPN8	calpain_8	5	UP
ENSGALT00000039576	8.19008	0.976791	3.06776	0.669217	chrZ	2160138	2176167	PSTPIP2	proline-serine-threonine_phosphatase_interacting_protein_2	5	UP
ENSGALT00000013266	8.19008	0.976791	3.06776	0.669217	chr10	19166390	19211028	ADAMTS7	ADAM_metallopeptidase_with_thrombospondin_type_1_motif,_7	5	UP
ENSGALT00000044360	8.19008	0.976791	3.06776	0.669217	chr3	15008232	15108357	SYNDIG1	Uncharacterized_protein_[Source:UniProtKB/TrEMBL;Acc:E1BYH1]	5	UP
ENSGALT00000007023	8.19008	0.976791	3.06776	0.669217	chr5	1393482	1395022	OR5AS1	Olfactory_receptor-like_protein_COR9_[Source:UniProtKB/Swiss-Prot;Acc:Q98914]	5	UP
ENSGALT00000010203	14.3326	4.88395	1.55318	0.672964	chr17	2459153	2485450	DFNB31	deafness,_autosomal_recessive_31	5	UP
ENSGALT00000026881	14.3326	4.88395	1.55318	0.672964	chr3	106838784	106848916	FAM167A	Uncharacterized_protein_[Source:UniProtKB/TrEMBL;Acc:E1BYM0]	5	UP
ENSGALT00000011721	18.4277	7.81433	1.23768	0.674498	chr4	10482616	10485048	-	-	5	UP
ENSGALT00000043894	18.4277	7.81433	1.23768	0.674498	-	-	-	-	-	5	UP
ENSGALT00000002375	18.4277	7.81433	1.23768	0.674498	chr19	3274475	3308472	ATP2A3	ATPase,_Ca++_transporting,_ubiquitous	5	UP
ENSGALT00000020516	18.4277	7.81433	1.23768	0.674498	chr7	35944237	35948751	DAPL1	Uncharacterized_protein_[Source:UniProtKB/TrEMBL;Acc:F1NC72]	5	UP
NM_204740	17.5142	5.82386	1.58847	0.675989	chr28	3316664	3324912	NCAN	neurocan	5	UP
NM_001278058	17.5142	5.82386	1.58847	0.675989	chr1	68652276	68664291	BIK	BIK	5	UP
ENSGALT00000002868	11.2614	2.93037	1.94223	0.678178	chrZ	1766201	1782160	KATNAL2	katanin_p60_subunit_A-like_2	5	UP
ENSGALT00000026109	11.2614	2.93037	1.94223	0.678178	chr2	144142254	144374426	COL22A1	collagen,_type_XXII,_alpha_1	5	UP
ENSGALT00000038830	11.2614	2.93037	1.94223	0.678178	chrZ	16787970	16819236	DDX4	DEAD_(Asp-Glu-Ala-Asp)_box_polypeptide_4	5	UP
ENSGALT00000013950	11.2614	2.93037	1.94223	0.678178	chr2	18980636	18996279	NSUN6	NOL1/NOP2/Sun_domain_family,_member_6	5	UP
ENSGALT00000007304	11.2614	2.93037	1.94223	0.678178	chr8	7367590	7372515	SERPINC1	serpin_peptidase_inhibitor,_clade_C_(antithrombin),_member_1_[Source:HGNC_Symbol;Acc:775]	5	UP
ENSGALT00000043264	12.2851	3.90716	1.65272	0.694529	chr18	10116717	10117433	SOCS3	suppressor_of_cytokine_signaling_3	5	UP
ENSGALT00000017935	12.2851	3.90716	1.65272	0.694529	-	-	-	SCN8A	Sodium_channel,_voltage_gated,_type_VIII,_alpha_subunit	5	UP
ENSGALT00000005496	12.2851	3.90716	1.65272	0.694529	chr22	2515404	2535297	ZMAT4	zinc_finger,_matrin_type_4	5	UP
ENSGALT00000045812	16.3802	6.83754	1.2604	0.695458	chr14	13607343	13612307	WDR90	WD_repeat_domain_90	5	UP
ENSGALT00000043324	9.21384	1.95358	2.23768	0.698959	-	-	-	-	-	5	UP
ENSGALT00000022980	9.21384	1.95358	2.23768	0.698959	chr4	67201645	67208925	GNPDA2	glucosamine-6-phosphate_deaminase_2	5	UP
ENSGALT00000025150	9.21384	1.95358	2.23768	0.698959	chrZ	63601952	63729018	RASGRF2	Ras_protein-specific_guanine_nucleotide-releasing_factor_2_[Source:HGNC_Symbol;Acc:9876]	5	UP
ENSGALT00000043031	13.3089	4.88395	1.44627	0.707511	-	-	-	-	-	5	UP
ENSGALT00000012837	13.3089	4.88395	1.44627	0.707511	chr10	18368139	18426597	IQCH	IQ_motif_containing_H	5	UP
NM_001109787	10.3024	1.94129	2.4079	0.713987	chrUn_JH375729	3263	5333	YRK	proto-oncogene_tyrosine-protein_kinase_Yrk	5	UP
ENSGALT00000000063	10.2376	2.93037	1.80472	0.718065	chr25	2183825	2189333	-	-	5	UP
ENSGALT00000010796	10.2376	2.93037	1.80472	0.718065	chr10	12468869	12473059	RLBP1	retinaldehyde_binding_protein_1	5	UP
ENSGALT00000046107	10.2376	2.93037	1.80472	0.718065	chr10	12469782	12473591	RLBP1	retinaldehyde_binding_protein_1	5	UP
ENSGALT00000001968	10.2376	2.93037	1.80472	0.718065	-	-	-	SHC2	SHC_(Src_homology_2_domain_containing)_transforming_protein_2	5	UP
ENSGALT00000018821	14.3326	5.86075	1.29015	0.718289	chr2	49737411	49842302	AMPH	amphiphysin	5	UP
ENSGALT00000026784	14.3326	5.86075	1.29015	0.718289	chr1	122962849	123267815	FRMPD4	FERM_and_PDZ_domain_containing_4	5	UP
ENSGALT00000035150	14.3326	5.86075	1.29015	0.718289	chr19	2637326	2644145	NCF1	neutrophil_cytosolic_factor_1	5	UP
ENSGALT00000007950	14.3326	5.86075	1.29015	0.718289	chr4	2006951	2017876	BTK	Bruton_agammaglobulinemia_tyrosine_kinase	5	UP
ENSGALT00000017193	14.3326	5.86075	1.29015	0.718289	chr4	37998528	38044094	NPNT	nephronectin	5	UP
ENSGALT00000044411	7.16632	0.976791	2.87511	0.719225	chr16	297930	324982	-	-	5	UP
ENSGALT00000032681	7.16632	0.976791	2.87511	0.719225	chr5	16056781	16068381	-	-	5	UP
ENSGALT00000026261	7.16632	0.976791	2.87511	0.719225	chr1	115540656	115874541	IL1RAPL1	interleukin_1_receptor_accessory_protein-like_1	5	UP
ENSGALT00000036680	7.16632	0.976791	2.87511	0.719225	chr2	116997436	117055053	TRPA1	transient_receptor_potential_cation_channel,_subfamily_A,_member_1	5	UP
ENSGALT00000044662	7.16632	0.976791	2.87511	0.719225	chr2	110014371	110035885	RGS20	regulator_of_G-protein_signaling_20	5	UP
ENSGALT00000023028	7.16632	0.976791	2.87511	0.719225	chr5	15148229	15163302	PIDD	p53-induced_death_domain_protein_[Source:HGNC_Symbol;Acc:16491]	5	UP
ENSGALT00000038352	7.16632	0.976791	2.87511	0.719225	chr2	17930604	17933285	SKIDA1	SKI/DACH_domain_containing_1_[Source:HGNC_Symbol;Acc:32697]	5	UP
ENSGALT00000037440	7.16632	0.976791	2.87511	0.719225	chr2	50693707	50901617	C7ORF10	C7ORF10	5	UP
NM_001080859	8.24196	0.970643	3.08597	0.728315	chr27	3662963	3665713	HOXB1	homeobox_B1	5	UP
NM_001277563	8.24196	0.970643	3.08597	0.728315	chr8	18513214	18515085	FAM183A	FAM183A	5	UP
ENSGALT00000043157	11.2614	3.90716	1.52719	0.732169	-	-	-	-	-	5	UP
ENSGALT00000040770	11.2614	3.90716	1.52719	0.732169	chr23	4901523	4907272	KCNQ4	potassium_voltage-gated_channel,_KQT-like_subfamily,_member_4	5	UP
ENSGALT00000038854	11.2614	3.90716	1.52719	0.732169	chr20	13750635	13751600	GGA.38342	Uncharacterized_protein_[Source:UniProtKB/TrEMBL;Acc:E1BYC8]	5	UP
ENSGALT00000003019	12.2851	4.88395	1.33079	0.743382	chr8	1208807	1228981	-	-	5	UP
ENSGALT00000010023	12.2851	4.88395	1.33079	0.743382	chr5	11381875	11476414	OTOG	otogelin	5	UP
ENSGALT00000012816	12.2851	4.88395	1.33079	0.743382	chr2	17577500	17600473	SPAG6	sperm_associated_antigen_6	5	UP
ENSGALT00000046085	12.2851	4.88395	1.33079	0.743382	chr2	17577504	17600696	SPAG6	sperm_associated_antigen_6	5	UP
ENSGALT00000033758	12.2851	4.88395	1.33079	0.743382	chr8	5662436	5667101	ZNF668	zinc_finger_protein_668_[Source:HGNC_Symbol;Acc:25821]	5	UP
ENSGALT00000041350	8.19008	1.95358	2.06776	0.743823	chr1	132491482	132497916	-	-	5	UP
ENSGALT00000032358	8.19008	1.95358	2.06776	0.743823	chr4	9508921	9512126	-	-	5	UP
ENSGALT00000007350	8.19008	1.95358	2.06776	0.743823	-	-	-	-	-	5	UP
ENSGALT00000015927	8.19008	1.95358	2.06776	0.743823	chr3	20624529	20662934	PROX1	prospero-related_homeobox_1	5	UP
ENSGALT00000045060	8.19008	1.95358	2.06776	0.743823	chr2	1722383	1826646	VIPR1	vasoactive_intestinal_peptide_receptor_1	5	UP
ENSGALT00000042075	9.21384	2.93037	1.65272	0.759597	chr25	186271	186353	-	-	5	UP
ENSGALT00000043391	9.21384	2.93037	1.65272	0.759597	chr13	1956723	1957797	-	-	5	UP
ENSGALT00000036188	9.21384	2.93037	1.65272	0.759597	-	-	-	-	-	5	UP
ENSGALT00000004533	9.21384	2.93037	1.65272	0.759597	chr9	9685764	9689489	ZBTB38	zinc_finger_and_BTB_domain_containing_38	5	UP
ENSGALT00000012000	9.21384	2.93037	1.65272	0.759597	chr9	14339431	14355179	MASP1	mannan-binding_lectin_serine_peptidase_1_(C4/C2_activating_component_of_Ra-reactive_factor)	5	UP
ENSGALT00000000773	9.21384	2.93037	1.65272	0.759597	chr26	1658324	1665181	ETNK2	ethanolamine_kinase_2	5	UP
ENSGALT00000020918	9.21384	2.93037	1.65272	0.759597	chr2	66376323	66400743	BPHL	biphenyl_hydrolase-like_(serine_hydrolase;_breast_epithelial_mucin-associated_antigen)	5	UP
ENSGALT00000016589	9.21384	2.93037	1.65272	0.759597	chr1	37557145	37660197	KCNC2	potassium_voltage-gated_channel,_Shaw-related_subfamily,_member_2	5	UP
ENSGALT00000042357	9.21384	2.93037	1.65272	0.759597	chr18	9906186	9906282	gga-mir-1652	gga-mir-1652_[Source:miRBase;Acc:MI0007384]	5	UP
ENSGALT00000005411	9.21384	2.93037	1.65272	0.759597	chr8	5141843	5166718	LMX1A	LIM_homeobox_transcription_factor_1,_alpha_[Source:HGNC_Symbol;Acc:6653]	5	UP
ENSGALT00000044798	10.2376	3.90716	1.38968	0.771277	chr19	103510	130515	-	-	5	UP
ENSGALT00000045528	10.2376	3.90716	1.38968	0.771277	chr18	4322900	4324052	-	-	5	UP
ENSGALT00000044478	10.2376	3.90716	1.38968	0.771277	chr13	8824619	8863288	-	-	5	UP
ENSGALT00000043739	10.2376	3.90716	1.38968	0.771277	chr16	270653	287316	B-G	MHC_B-G_antigen	5	UP
ENSGALT00000004499	10.2376	3.90716	1.38968	0.771277	chr17	7026159	7045384	SARDH	Sarcosine_dehydrogenase	5	UP
ENSGALT00000039232	6.14256	0.976791	2.65272	0.771582	chr1	16881661	16882360	-	-	5	UP
ENSGALT00000022671	6.14256	0.976791	2.65272	0.771582	chr3	56080842	56088624	-	-	5	UP
ENSGALT00000045092	6.14256	0.976791	2.65272	0.771582	-	-	-	-	-	5	UP
ENSGALT00000024512	6.14256	0.976791	2.65272	0.771582	chr1	82940415	82959869	CCDC80	coiled-coil_domain_containing_80	5	UP
ENSGALT00000030862	6.14256	0.976791	2.65272	0.771582	chr2	120988401	121062954	PAG1	phosphoprotein_associated_with_glycosphingolipid_microdomains_1	5	UP
ENSGALT00000013696	6.14256	0.976791	2.65272	0.771582	chr4	14214092	14257191	GAB3	GRB2-associated_binding_protein_3	5	UP
ENSGALT00000018286	6.14256	0.976791	2.65272	0.771582	chr5	48382975	48397523	DEGS2	degenerative_spermatocyte_homolog_2,_lipid_desaturase_(Drosophila)	5	UP
ENSGALT00000018269	6.14256	0.976791	2.65272	0.771582	chr3	40939402	41033678	SMOC2	SPARC_related_modular_calcium_binding_2	5	UP
ENSGALT00000019757	6.14256	0.976791	2.65272	0.771582	chr5	55279122	55387350	SLC35F4	solute_carrier_family_35,_member_F4	5	UP
ENSGALT00000009304	6.14256	0.976791	2.65272	0.771582	chr6	17103310	17116408	ABCG2	ATP-binding_cassette,_sub-family_G_(WHITE),_member_2	5	UP
ENSGALT00000025175	6.14256	0.976791	2.65272	0.771582	chrZ	63526278	63558532	ACOT12	acyl-CoA_thioesterase_12	5	UP
ENSGALT00000025032	6.14256	0.976791	2.65272	0.771582	chr2	114970566	114979273	MCMDC2	minichromosome_maintenance_domain_containing_2_[Source:HGNC_Symbol;Acc:26368]	5	UP
ENSGALT00000003282	6.14256	0.976791	2.65272	0.771582	chr11	1213865	1215689	TPPP3	tubulin_polymerization-promoting_protein_family_member_3_[Source:HGNC_Symbol;Acc:24162]	5	UP
ENSGALT00000002417	6.14256	0.976791	2.65272	0.771582	-	-	-	ACER1	Uncharacterized_protein_[Source:UniProtKB/TrEMBL;Acc:F1NLL6]	5	UP
ENSGALT00000027228	6.14256	0.976791	2.65272	0.771582	chr1	139440676	139454301	BAFF	tumor_necrosis_factor_ligand_superfamily_member_13B_[Source:RefSeq_peptide;Acc:NP_989658]	5	UP
ENSGALT00000016381	6.14256	0.976791	2.65272	0.771582	chr3	28650944	28730284	GLP-1R	glucagon-like_peptide_1_receptor_precursor_[Source:RefSeq_peptide;Acc:NP_001129023]	5	UP
ENSGALT00000045496	6.14256	0.976791	2.65272	0.771582	-	-	-	MADCAM1	mucosal_vascular_addressin_cell_adhesion_molecule_1_[Source:HGNC_Symbol;Acc:6765]	5	UP
ENSGALT00000013613	11.2614	4.88395	1.20526	0.780593	chr3	3258572	3260939	CD93	CD93_molecule	5	UP
ENSGALT00000003755	11.2614	4.88395	1.20526	0.780593	chrZ	8938773	8946552	TMEM8B	chromosome_9_open_reading_frame_127	5	UP
ENSGALT00000014731	11.2614	4.88395	1.20526	0.780593	chr6	27359429	27532008	ABLIM1	actin_binding_LIM_protein_1	5	UP
ENSGALT00000044578	11.2614	4.88395	1.20526	0.780593	chr6	27364931	27532007	ABLIM1	actin_binding_LIM_protein_1	5	UP
ENSGALT00000038895	11.2614	4.88395	1.20526	0.780593	chr4	19781303	19787443	FGB	fibrinogen_beta_chain	5	UP
ENSGALT00000011938	11.2614	4.88395	1.20526	0.780593	chr15	9720473	9724236	HSPB8	heat_shock_22kDa_protein_8	5	UP
ENSGALT00000003317	11.2614	4.88395	1.20526	0.780593	chr23	3977705	3987124	OSCP1	organic_solute_carrier_partner_1_[Source:HGNC_Symbol;Acc:29971]	5	UP
NM_001177739	8.24196	1.94129	2.08597	0.789691	chr4	84891801	84900037	ATOH8	Atonal_homolog_8_(Drosophila)	5	UP
ENSGALT00000043428	7.16632	1.95358	1.87511	0.790533	chr1	82397144	82412833	DRD3	dopamine_receptor_D3	5	UP
ENSGALT00000009806	7.16632	1.95358	1.87511	0.790533	chr13	13369101	13433718	RASGEF1C	RasGEF_domain_family,_member_1C	5	UP
ENSGALT00000024043	7.16632	1.95358	1.87511	0.790533	chrZ	15930690	15938408	FST	follistatin	5	UP
ENSGALT00000013344	7.16632	1.95358	1.87511	0.790533	chr1	12865260	13129087	RELN	reelin	5	UP
ENSGALT00000005192	7.16632	1.95358	1.87511	0.790533	-	-	-	COMP	Cartilage_oligomeric_matrix_protein	5	UP
ENSGALT00000005095	7.16632	1.95358	1.87511	0.790533	chr14	924498	931316	LITAF	lipopolysaccharide-induced_TNF_factor	5	UP
ENSGALT00000011965	7.16632	1.95358	1.87511	0.790533	chr6	21624620	21638091	ABCC2	ATP-binding_cassette,_sub-family_C_(CFTR/MRP),_member_2	5	UP
ENSGALT00000016607	7.16632	1.95358	1.87511	0.790533	chr4	34002113	34039693	PHF17	PHD_finger_protein_17_[Source:HGNC_Symbol;Acc:30027]	5	UP
ENSGALT00000044284	7.16632	1.95358	1.87511	0.790533	chr19	74802	75910	VPS37D	vacuolar_protein_sorting_37_homolog_D_(S._cerevisiae)_[Source:HGNC_Symbol;Acc:18287]	5	UP
NR_035143	9.2722	2.91193	1.67094	0.800992	chr18	9906187	9906282	MIR1652 (gga-mir-1652)	MIR1652	5	UP
ENSGALT00000041220	8.19008	2.93037	1.48279	0.802747	chr9	3031932	3033636	-	-	5	UP
ENSGALT00000015161	8.19008	2.93037	1.48279	0.802747	chr3	16902315	16902948	-	-	5	UP
ENSGALT00000032887	8.19008	2.93037	1.48279	0.802747	chr7	35068291	35071127	-	-	5	UP
ENSGALT00000011880	8.19008	2.93037	1.48279	0.802747	chr13	16717402	16731816	FGF1	Fibroblast_growth_factor_1_(acidic)	5	UP
ENSGALT00000012279	8.19008	2.93037	1.48279	0.802747	chr4	11612706	11617276	ASB12	ankyrin_repeat_and_SOCS_box-containing_12	5	UP
ENSGALT00000037064	8.19008	2.93037	1.48279	0.802747	chr2	83099423	83462516	FHOD3	Formin_homology_2_domain_containing_3	5	UP
ENSGALT00000012588	8.19008	2.93037	1.48279	0.802747	chr15	10762715	10770771	IQCD	IQ_motif_containing_D	5	UP
ENSGALT00000040398	8.19008	2.93037	1.48279	0.802747	chr21	1862887	1896737	C1orf222	chromosome_1_open_reading_frame_222_[Source:HGNC_Symbol;Acc:27917]	5	UP
ENSGALT00000026133	8.19008	2.93037	1.48279	0.802747	chr1	109714789	109720919	LICOS	ICOS_ligand_precursor_[Source:RefSeq_peptide;Acc:NP_990415]	5	UP
ENSGALT00000022977	8.19008	2.93037	1.48279	0.802747	chr19	6078719	6082597	CORO6	coronin_6_[Source:HGNC_Symbol;Acc:21356]	5	UP
ENSGALT00000039955	8.19008	2.93037	1.48279	0.802747	chr20	5847926	5855091	JPH2	junctophilin_2_[Source:HGNC_Symbol;Acc:14202]	5	UP
ENSGALT00000036197	8.19008	2.93037	1.48279	0.802747	-	-	-	ZNF541	zinc_finger_protein_541_[Source:HGNC_Symbol;Acc:25294]	5	UP
ENSGALT00000004056	9.21384	3.90716	1.23768	0.811859	chr13	1308095	1310139	-	-	5	UP
ENSGALT00000008280	9.21384	3.90716	1.23768	0.811859	chr6	15465025	15479995	-	-	5	UP
ENSGALT00000012692	9.21384	3.90716	1.23768	0.811859	chr12	16592805	16714374	PDZRN3	PDZ_domain_containing_RING_finger_3	5	UP
ENSGALT00000012977	9.21384	3.90716	1.23768	0.811859	chr4	13192063	13262633	DCX	doublecortex	5	UP
ENSGALT00000042652	9.21384	3.90716	1.23768	0.811859	chrZ	55526379	55531189	KLF4	Kruppel-like_factor_4_(gut)	5	UP
ENSGALT00000015245	9.21384	3.90716	1.23768	0.811859	chr3	17021060	17040693	CAPN2	calpain_2,_(m/II)_large_subunit	5	UP
ENSGALT00000000386	9.21384	3.90716	1.23768	0.811859	chr26	853959	876469	IGFN1	immunoglobulin-like_and_fibronectin_type_III_domain_containing_1	5	UP
ENSGALT00000026475	9.21384	3.90716	1.23768	0.811859	chr2	136280449	136356111	DEPTOR	DEP_domain-containing_mTOR-interacting_protein_[Source:RefSeq_peptide;Acc:NP_001186431]	5	UP
ENSGALT00000022620	9.21384	3.90716	1.23768	0.811859	chr2	97607395	97902750	PIEZO2	piezo-type_mechanosensitive_ion_channel_component_2_[Source:HGNC_Symbol;Acc:26270]	5	UP
NM_204327	6.18147	0.970643	2.67094	0.815516	chr1	139440813	139454165	TNFSF13B	tumor_necrosis_factor_(ligand)_superfamily,_member_13b	5	UP
NM_001135551	6.18147	0.970643	2.67094	0.815516	chr3	28651135	28730284	GLP1R	glucagon-like_peptide_1_receptor	5	UP
ENSGALT00000002818	5.1188	0.976791	2.38968	0.825973	chr11	1155406	1157865	-	-	5	UP
ENSGALT00000042752	5.1188	0.976791	2.38968	0.825973	chr21	1426229	1429603	-	-	5	UP
ENSGALT00000016155	5.1188	0.976791	2.38968	0.825973	chr27	3239713	3247916	-	-	5	UP
ENSGALT00000011355	5.1188	0.976791	2.38968	0.825973	chr10	16161523	16172113	-	-	5	UP
ENSGALT00000014202	5.1188	0.976791	2.38968	0.825973	chr5	24464673	24483565	-	-	5	UP
ENSGALT00000023885	5.1188	0.976791	2.38968	0.825973	chr2	100436018	100460793	-	-	5	UP
ENSGALT00000041152	5.1188	0.976791	2.38968	0.825973	-	-	-	-	-	5	UP
ENSGALT00000001168	5.1188	0.976791	2.38968	0.825973	-	-	-	LINGO3	leucine_rich_repeat_and_Ig_domain_containing_3	5	UP
ENSGALT00000012514	5.1188	0.976791	2.38968	0.825973	chr5	17230852	17528495	SHANK2	SH3_and_multiple_ankyrin_repeat_domains_2	5	UP
ENSGALT00000005603	5.1188	0.976791	2.38968	0.825973	chr20	4000629	4004091	SLC32A1	solute_carrier_family_32_(GABA_vesicular_transporter),_member_1	5	UP
ENSGALT00000012375	5.1188	0.976791	2.38968	0.825973	chr2	16182204	16276588	MYO3A	myosin_IIIA	5	UP
ENSGALT00000024871	5.1188	0.976791	2.38968	0.825973	chr2	111076868	111081312	PENK	proenkephalin	5	UP
ENSGALT00000005275	5.1188	0.976791	2.38968	0.825973	chr27	4871018	4873562	GHDC	GH3_domain_containing	5	UP
ENSGALT00000014245	5.1188	0.976791	2.38968	0.825973	chr3	11215024	11230471	PLEK	pleckstrin	5	UP
ENSGALT00000023592	5.1188	0.976791	2.38968	0.825973	-	-	-	GLI1	glioma-associated_oncogene_homolog_1_(zinc_finger_protein)	5	UP
ENSGALT00000038898	5.1188	0.976791	2.38968	0.825973	chr20	12692258	12699688	CYP24A1	cytochrome_P450,_family_24,_subfamily_A,_polypeptide_1	5	UP
ENSGALT00000034089	5.1188	0.976791	2.38968	0.825973	chr10	11795652	11837829	TMEM2	transmembrane_protein_2	5	UP
ENSGALT00000017722	5.1188	0.976791	2.38968	0.825973	chr4	44875120	44892847	BMP3	bone_morphogenetic_protein_3_(osteogenic)	5	UP
ENSGALT00000037692	5.1188	0.976791	2.38968	0.825973	chr2	39840169	40183497	RBMS3	RNA_binding_motif,_single_stranded_interacting_protein	5	UP
ENSGALT00000023686	5.1188	0.976791	2.38968	0.825973	chr1	77089394	77125849	CLCN1	chloride_channel_1,_skeletal_muscle_(Thomsen_disease,_autosomal_dominant)	5	UP
ENSGALT00000010794	5.1188	0.976791	2.38968	0.825973	chr20	10649023	10653537	BPIFB6	BPI_fold_containing_family_B,_member_6_[Source:HGNC_Symbol;Acc:16504]	5	UP
ENSGALT00000025097	5.1188	0.976791	2.38968	0.825973	chr2	115526241	115690070	C8orf34	chromosome_8_open_reading_frame_34_[Source:HGNC_Symbol;Acc:30905]	5	UP
ENSGALT00000007324	5.1188	0.976791	2.38968	0.825973	chr15	6093726	6094443	FAM109A	Uncharacterized_protein_[Source:UniProtKB/TrEMBL;Acc:E1BXL6]	5	UP
ENSGALT00000038609	5.1188	0.976791	2.38968	0.825973	chr5	18304372	18308342	GGA.48584	Uncharacterized_protein_[Source:UniProtKB/TrEMBL;Acc:E1BSE9]	5	UP
ENSGALT00000042350	5.1188	0.976791	2.38968	0.825973	chr15	5706074	5706153	gga-mir-762	gga-mir-762_[Source:miRBase;Acc:MI0008209]	5	UP
ENSGALT00000019805	5.1188	0.976791	2.38968	0.825973	chr5	5217601	5231603	PAX-6 (PAX6)	Paired_box_protein_Pax-6_[Source:UniProtKB/Swiss-Prot;Acc:P47237]	5	UP
ENSGALT00000042497	5.1188	0.976791	2.38968	0.825973	chr9	701236	701498	SCARNA6	Small_Cajal_body_specific_RNA_6_[Source:RFAM;Acc:RF00478]	5	UP
ENSGALT00000042530	5.1188	0.976791	2.38968	0.825973	chr9	15672949	15673019	SNORD2	Small_nucleolar_RNA_SNORD2_[Source:RFAM;Acc:RF01299]	5	UP
ENSGALT00000016487	5.1188	0.976791	2.38968	0.825973	chr5	36632382	36633663	SS1R	somatostatin_receptor_type_1_[Source:RefSeq_peptide;Acc:NP_001106638]	5	UP
ENSGALT00000038472	5.1188	0.976791	2.38968	0.825973	chr4	33309103	33320854	TMEM154	Uncharacterized_protein_[Source:UniProtKB/TrEMBL;Acc:F1P4Z7]	5	UP
NM_001277881	7.21171	1.94129	1.89333	0.82908	chr21	1415134	1416796	LOC419390/ HES5-like	similar_to_enhancer_of_split_related_protein-7	5	UP
ENSGALT00000043859	6.14256	1.95358	1.65272	0.838965	chr27	4645877	4646526	-	-	5	UP
ENSGALT00000043908	6.14256	1.95358	1.65272	0.838965	chr4	76600158	76601874	-	-	5	UP
ENSGALT00000043677	6.14256	1.95358	1.65272	0.838965	-	-	-	-	-	5	UP
ENSGALT00000016992	6.14256	1.95358	1.65272	0.838965	chr3	30420674	30444025	RASGRP3	RAS_guanyl_releasing_protein_3_(calcium_and_DAG-regulated)	5	UP
ENSGALT00000004926	6.14256	1.95358	1.65272	0.838965	chr22	2203022	2212432	GPR124	G_protein-coupled_receptor_124	5	UP
ENSGALT00000028044	6.14256	1.95358	1.65272	0.838965	chr19	6439175	6447413	ADORA2B	adenosine_A2b_receptor	5	UP
ENSGALT00000025475	6.14256	1.95358	1.65272	0.838965	chr8	22464842	22520934	ELAVL4	ELAV_(embryonic_lethal,_abnormal_vision,_Drosophila)-like_4_(Hu_antigen_D)	5	UP
ENSGALT00000009998	6.14256	1.95358	1.65272	0.838965	-	-	-	YFV	MHC_class_I_antigen	5	UP
ENSGALT00000017289	6.14256	1.95358	1.65272	0.838965	chr3	33075990	33096731	SRD5A2	steroid-5-alpha-reductase,_alpha_polypeptide_2_(3-oxo-5_alpha-steroid_delta_4-dehydrogenase_alpha_2)	5	UP
ENSGALT00000039416	6.14256	1.95358	1.65272	0.838965	chr2	173803	179883	GBX-1	Transcription_factor_Gbx-1_[Source:UniProtKB/TrEMBL;Acc:Q9DEB1]	5	UP
ENSGALT00000044439	6.14256	1.95358	1.65272	0.838965	chr23	2053806	2086993	SESN2	sestrin_2_[Source:HGNC_Symbol;Acc:20746]	5	UP
ENSGALT00000016770	6.14256	1.95358	1.65272	0.838965	chr5	37434155	37436408	FAM164C	Uncharacterized_protein_[Source:UniProtKB/TrEMBL;Acc:F1NAH9]	5	UP
ENSGALT00000043939	6.14256	1.95358	1.65272	0.838965	chrZ	70557161	70557233	gga-mir-2954	gga-mir-2954_[Source:miRBase;Acc:MI0013634]	5	UP
ENSGALT00000016634	6.14256	1.95358	1.65272	0.838965	chr5	37167460	37170933	SYNDIG1L	Uncharacterized_protein_[Source:UniProtKB/TrEMBL;Acc:E1BZT0]	5	UP
NM_001199502	9.2722	3.88257	1.2559	0.843473	chr2	136280416	136352795	DEPDC6	DEP_domain_containing_6	5	UP
ENSGALT00000045685	7.16632	2.93037	1.29015	0.847486	chr4	85449697	85458910	-	-	5	UP
ENSGALT00000038248	7.16632	2.93037	1.29015	0.847486	chr3	28093814	28285437	DAAM2	dishevelled_associated_activator_of_morphogenesis_2	5	UP
ENSGALT00000000503	7.16632	2.93037	1.29015	0.847486	chr27	2226990	2253136	CRHR1	corticotropin_releasing_hormone_receptor_1	5	UP
ENSGALT00000015334	7.16632	2.93037	1.29015	0.847486	chr5	26991939	27112082	SMOC1	SPARC_related_modular_calcium_binding_1	5	UP
ENSGALT00000002140	7.16632	2.93037	1.29015	0.847486	chr24	1673352	1682880	ADAMTS15	ADAM_metallopeptidase_with_thrombospondin_type_1_motif,_15	5	UP
ENSGALT00000021804	7.16632	2.93037	1.29015	0.847486	chr15	11049421	11052377	CABP7	calcium_binding_protein_7	5	UP
ENSGALT00000003373	7.16632	2.93037	1.29015	0.847486	chr13	2855997	2879559	GABRP	gamma-aminobutyric_acid_(GABA)_A_receptor,_pi	5	UP
ENSGALT00000007421	7.16632	2.93037	1.29015	0.847486	chr21	5667615	5670436	FBXO2	F-box_protein_2	5	UP
ENSGALT00000019691	7.16632	2.93037	1.29015	0.847486	chr2	46489571	46501336	DCLK3	doublecortin-like_kinase_3	5	UP
ENSGALT00000044024	7.16632	2.93037	1.29015	0.847486	chrZ	16589251	16590557	CCNO	cyclin_O_[Source:HGNC_Symbol;Acc:18576]	5	UP
ENSGALT00000043598	7.16632	2.93037	1.29015	0.847486	-	-	-	MPZ	myelin_protein_zero_[Source:HGNC_Symbol;Acc:7225]	5	UP
ENSGALT00000004039	7.16632	2.93037	1.29015	0.847486	chr26	3969391	3973567	NGF	Nerve_growth_factor_beta_polypeptide_[Source:UniProtKB/TrEMBL;Acc:B4ZE58]	5	UP
ENSGALT00000001870	7.16632	2.93037	1.29015	0.847486	chr23	2342637	2349134	RHD	Rh_blood_group_D_antigen_[Source:RefSeq_peptide;Acc:NP_989798]	5	UP
NM_001039605	5.15122	0.970643	2.4079	0.86059	chr8	24662964	24681581	PRKAA2	protein_kinase,_AMP-activated,_alpha_2_catalytic_subunit	5	UP
NM_001044666	5.15122	0.970643	2.4079	0.86059	chrz	43589651	43590574	GADD45B	Growth_arrest_and_DNA-damage-inducible,_beta	5	UP
NM_001113167	5.15122	0.970643	2.4079	0.86059	chr5	36632383	36633663	SSTR1	somatostatin_receptor_1	5	UP
NR_035328	5.15122	0.970643	2.4079	0.86059	chr15	5706075	5706153	MIR762 (gga-mir-762)	MIR762	5	UP
NM_001080867	6.18147	1.94129	1.67094	0.869306	chr16_JH375207_random	7101	21254	MR1	Major_histocompatibility_complex,_class_I-related	5	UP
NM_205400	6.18147	1.94129	1.67094	0.869306	chr27	4645878	4646526	LOC396365/preprogastrin	preprogastrin	5	UP
NM_001030675	6.18147	1.94129	1.67094	0.869306	chr16_JH375207_random	7101	21254	YF5	YF5	5	UP
NM_001184719	6.18147	1.94129	1.67094	0.869306	chr16_JH375207_random	7101	21254	LOC768350/MHC Rfp-Y class I alpha chain (YFVI) pseudogene	LOC768350	5	UP
ENSGALT00000042749	4.09504	0.976791	2.06776	0.881904	chr1	31159	35950	-	-	5	UP
ENSGALT00000021933	4.09504	0.976791	2.06776	0.881904	chr27	3662962	3664600	-	-	5	UP
ENSGALT00000042720	4.09504	0.976791	2.06776	0.881904	chr7	5426746	5426908	-	-	5	UP
ENSGALT00000039593	4.09504	0.976791	2.06776	0.881904	chr14	12470688	12472155	-	-	5	UP
ENSGALT00000009661	4.09504	0.976791	2.06776	0.881904	chr13	13158122	13161628	-	-	5	UP
ENSGALT00000045565	4.09504	0.976791	2.06776	0.881904	chr10	14116003	14117026	-	-	5	UP
ENSGALT00000021845	4.09504	0.976791	2.06776	0.881904	chr2	88761815	88910236	-	-	5	UP
ENSGALT00000043195	4.09504	0.976791	2.06776	0.881904	chr3	110287062	110387161	-	-	5	UP
ENSGALT00000030802	4.09504	0.976791	2.06776	0.881904	chr2	147954962	147960386	-	-	5	UP
ENSGALT00000045326	4.09504	0.976791	2.06776	0.881904	-	-	-	-	-	5	UP
ENSGALT00000014533	4.09504	0.976791	2.06776	0.881904	chr5	24487475	24583608	SPTBN5	spectrin,_beta,_non-erythrocytic_5	5	UP
ENSGALT00000026084	4.09504	0.976791	2.06776	0.881904	chr1	108848246	108891187	PDE9A	phosphodiesterase_9A	5	UP
ENSGALT00000021640	4.09504	0.976791	2.06776	0.881904	chr25	416280	424122	NTRK1	neurotrophic_tyrosine_kinase,_receptor,_type_1	5	UP
ENSGALT00000005196	4.09504	0.976791	2.06776	0.881904	chr13	9688762	9697357	CDHR2	cadherin-related_family_member_2	5	UP
ENSGALT00000000599	4.09504	0.976791	2.06776	0.881904	chr26	1413002	1414502	KCNA2	potassium_voltage-gated_channel,_shaker-related_subfamily,_member_2	5	UP
ENSGALT00000009192	4.09504	0.976791	2.06776	0.881904	chr13	12566518	12588276	PDGFRB	platelet-derived_growth_factor_receptor,_beta_polypeptide	5	UP
ENSGALT00000008150	4.09504	0.976791	2.06776	0.881904	chr14	5129152	5157900	SLC5A10	Solute_carrier_family_5_(sodium/glucose_cotransporter),_member_10	5	UP
ENSGALT00000004656	4.09504	0.976791	2.06776	0.881904	chr7	2785929	2886932	CPS1	carbamoyl-phosphate_synthase_1,_mitochondrial	5	UP
ENSGALT00000000460	4.09504	0.976791	2.06776	0.881904	-	-	-	YFV	MHC_class_I_antigen	5	UP
ENSGALT00000040471	4.09504	0.976791	2.06776	0.881904	chr9	11878867	11880012	AGTR1	angiotensin_II_receptor,_type_1	5	UP
ENSGALT00000019447	4.09504	0.976791	2.06776	0.881904	chr1	49374130	49410748	MEI1	meiosis_inhibitor_1	5	UP
ENSGALT00000044565	4.09504	0.976791	2.06776	0.881904	chr5	484889	487031	GIF	Gastric_intrinsic_factor_(vitamin_B_synthesis)	5	UP
ENSGALT00000039946	4.09504	0.976791	2.06776	0.881904	chr7	4098342	4133463	VWC2L	von_Willebrand_factor_C_domain-containing_protein_2-like	5	UP
ENSGALT00000017674	4.09504	0.976791	2.06776	0.881904	chr7	18356766	18360929	RDH5	retinol_dehydrogenase_5_(11-cis/9-cis)	5	UP
ENSGALT00000016068	4.09504	0.976791	2.06776	0.881904	chr3	22069416	22144928	SYT14	synaptotagmin_XIV	5	UP
ENSGALT00000022171	4.09504	0.976791	2.06776	0.881904	chr4	62636729	62652254	SLC7A2	solute_carrier_family_7_(cationic_amino_acid_transporter,_y+_system),_member_2	5	UP
ENSGALT00000033711	4.09504	0.976791	2.06776	0.881904	chr20	10663663	10668879	BPIFB4	BPI_fold_containing_family_B,_member_4_[Source:HGNC_Symbol;Acc:16179]	5	UP
ENSGALT00000044651	4.09504	0.976791	2.06776	0.881904	chr15	11172364	11179698	EMID1	EMI_domain_containing_1_[Source:HGNC_Symbol;Acc:18036]	5	UP
ENSGALT00000002208	4.09504	0.976791	2.06776	0.881904	chr23	3153761	3156554	FAM110D	family_with_sequence_similarity_110,_member_D_[Source:HGNC_Symbol;Acc:25860]	5	UP
ENSGALT00000021996	4.09504	0.976791	2.06776	0.881904	chr3	48447031	48720659	SYNE1	spectrin_repeat_containing,_nuclear_envelope_1_[Source:HGNC_Symbol;Acc:17089]	5	UP
ENSGALT00000042856	4.09504	0.976791	2.06776	0.881904	chr4	18607591	18625217	FMR1NB	fragile_X_mental_retardation_1_neighbor_[Source:HGNC_Symbol;Acc:26372]	5	UP
ENSGALT00000045785	4.09504	0.976791	2.06776	0.881904	chr8	20873410	20875481	FOXE1	forkhead_box_E1_(thyroid_transcription_factor_2)_[Source:HGNC_Symbol;Acc:3806]	5	UP
ENSGALT00000043410	4.09504	0.976791	2.06776	0.881904	chr3	29704334	29704444	gga-mir-4732	gga-mir-4732_[Source:miRBase;Acc:MI0022440]	5	UP
ENSGALT00000043199	4.09504	0.976791	2.06776	0.881904	chr1	144810732	144811489	HS6ST3	heparan_sulfate_6-O-sulfotransferase_3_[Source:HGNC_Symbol;Acc:19134]	5	UP
ENSGALT00000014499	4.09504	0.976791	2.06776	0.881904	chr3	13291086	13299548	LAMP5	lysosomal-associated_membrane_protein_family,_member_5_[Source:HGNC_Symbol;Acc:16097]	5	UP
ENSGALT00000035776	4.09504	0.976791	2.06776	0.881904	chr27	3896637	3899664	LRRC46	leucine_rich_repeat_containing_46_[Source:HGNC_Symbol;Acc:25047]	5	UP
ENSGALT00000019804	4.09504	0.976791	2.06776	0.881904	chr5	5218641	5235474	PAX-6 (PAX6)	Paired_box_protein_Pax-6_[Source:UniProtKB/Swiss-Prot;Acc:P47237]	5	UP
ENSGALT00000034617	4.09504	0.976791	2.06776	0.881904	chr11	1130091	1147360	RLTPR	RGD_motif,_leucine_rich_repeats,_tropomodulin_domain_and_proline-rich_containing_[Source:HGNC_Symbol;Acc:27089]	5	UP
ENSGALT00000024457	4.09504	0.976791	2.06776	0.881904	chrZ	36568083	36656370	TRPM6	transient_receptor_potential_cation_channel,_subfamily_M,_member_6_[Source:HGNC_Symbol;Acc:17995]	5	UP
ENSGALT00000000246	5.1188	1.95358	1.38968	0.888976	chr1	189735109	189737405	-	-	5	UP
ENSGALT00000008832	5.1188	1.95358	1.38968	0.888976	chr11	16191242	16203598	WFDC1	WAP_four-disulfide_core_domain_1	5	UP
ENSGALT00000019835	5.1188	1.95358	1.38968	0.888976	chr5	4504237	4506226	KCNA4	potassium_voltage-gated_channel,_shaker-related_subfamily,_member_4	5	UP
ENSGALT00000027918	5.1188	1.95358	1.38968	0.888976	chr1	192042795	192043578	KCTD21	potassium_channel_tetramerisation_domain_containing_21	5	UP
ENSGALT00000014374	5.1188	1.95358	1.38968	0.888976	chr3	13999211	14027688	HAO1	hydroxyacid_oxidase_(glycolate_oxidase)_1	5	UP
ENSGALT00000044168	5.1188	1.95358	1.38968	0.888976	-	-	-	TRMT2B	Uncharacterized_protein_[Source:UniProtKB/TrEMBL;Acc:E1BRR1]	5	UP
ENSGALT00000042407	5.1188	1.95358	1.38968	0.888976	chr14	12263701	12263772	gga-mir-1564	gga-mir-1564_[Source:miRBase;Acc:MI0007289]	5	UP
ENSGALT00000043581	5.1188	1.95358	1.38968	0.888976	chr11	18210718	18210828	gga-mir-6667	gga-mir-6667_[Source:miRBase;Acc:MI0022487]	5	UP
NM_205066	4.12098	0.970643	2.08597	0.906065	chr5	5218642	5235474	PAX6	paired_box_gene_6	5	UP
NM_205358	4.12098	0.970643	2.08597	0.906065	chr17	10059203	10152878	LMX1B	LIM_homeobox_transcription_factor_1,_beta	5	UP
NM_001277839	5.15122	1.94129	1.4079	0.9102	chr24	2587385	2617257	B3GAT1	beta-1,3-glucuronyltransferase_1_(glucuronosyltransferase_P)	5	UP
NR_035048	5.15122	1.94129	1.4079	0.9102	chr14	12263702	12263772	MIR1564 (gga-mir-1564)	MIR1564	5	UP
ENSGALT00000040303	3.07128	0.976791	1.65272	0.938712	chr19	3876785	3878939	-	-	5	UP
ENSGALT00000043528	3.07128	0.976791	1.65272	0.938712	chr15	6351113	6354256	-	-	5	UP
ENSGALT00000042643	3.07128	0.976791	1.65272	0.938712	chr11	6524176	6524416	-	-	5	UP
ENSGALT00000003467	3.07128	0.976791	1.65272	0.938712	chr7	6899881	6906295	-	-	5	UP
ENSGALT00000033499	3.07128	0.976791	1.65272	0.938712	chr8	10627998	10655431	-	-	5	UP
ENSGALT00000033572	3.07128	0.976791	1.65272	0.938712	chr10	19541203	19548098	-	-	5	UP
ENSGALT00000038460	3.07128	0.976791	1.65272	0.938712	chr4	33606438	33612969	-	-	5	UP
ENSGALT00000045988	3.07128	0.976791	1.65272	0.938712	chr1	167328372	167328817	-	-	5	UP
ENSGALT00000044708	3.07128	0.976791	1.65272	0.938712	-	-	-	-	-	5	UP
ENSGALT00000046165	3.07128	0.976791	1.65272	0.938712	chr2	24572216	24577130	DLX6	distal-less_homeobox_6	5	UP
ENSGALT00000008952	3.07128	0.976791	1.65272	0.938712	chr15	7123774	7135058	SEZ6L	Seizure_related_6_homolog_(mouse)-like	5	UP
ENSGALT00000006945	3.07128	0.976791	1.65272	0.938712	chr13	12341372	12344594	CCDC69	coiled-coil_domain_containing_69	5	UP
ENSGALT00000004464	3.07128	0.976791	1.65272	0.938712	chr7	2531063	2651198	UNC80	unc-80_homolog_(C._elegans)	5	UP
ENSGALT00000006154	3.07128	0.976791	1.65272	0.938712	chr17	6043773	6054936	FIBCD1	fibrinogen_C_domain_containing_1	5	UP
ENSGALT00000011103	3.07128	0.976791	1.65272	0.938712	chr10	13701911	13728770	SV2B	synaptic_vesicle_glycoprotein_2B	5	UP
ENSGALT00000022188	3.07128	0.976791	1.65272	0.938712	chr4	62708777	62738004	MTMR7	Myotubularin_related_protein_7	5	UP
ENSGALT00000033030	3.07128	0.976791	1.65272	0.938712	chr8	24023107	24025375	LDLRAD1	Low_density_lipoprotein_receptor_class_A_domain_containing_1	5	UP
ENSGALT00000001957	3.07128	0.976791	1.65272	0.938712	chr27	3413411	3417057	PHOSPHO1	phosphatase,_orphan_1	5	UP
ENSGALT00000043751	3.07128	0.976791	1.65272	0.938712	chr3	94575874	94584183	CMPK2	cytidine_monophosphate_(UMP-CMP)_kinase_2,_mitochondrial	5	UP
ENSGALT00000027858	3.07128	0.976791	1.65272	0.938712	chr1	186845640	186876181	FOLH1	folate_hydrolase_(prostate-specific_membrane_antigen)_1	5	UP
ENSGALT00000005285	3.07128	0.976791	1.65272	0.938712	chr17	6830388	6837593	GBGT1	globoside_alpha-1,3-N-acetylgalactosaminyltransferase_1	5	UP
ENSGALT00000002956	3.07128	0.976791	1.65272	0.938712	chr23	3551601	3581930	EPHA10	EPH_receptor_A10	5	UP
ENSGALT00000001482	3.07128	0.976791	1.65272	0.938712	chr19	410357	421656	MPO	myeloperoxidase	5	UP
ENSGALT00000024287	3.07128	0.976791	1.65272	0.938712	chr2	102780727	102893609	LAMA3	laminin,_alpha_3	5	UP
ENSGALT00000025287	3.07128	0.976791	1.65272	0.938712	chrZ	65978328	66017991	SUSD1	sushi_domain_containing_1	5	UP
ENSGALT00000044178	3.07128	0.976791	1.65272	0.938712	chr3	101273781	101273961	uc_338	TUC338_[Source:RFAM;Acc:RF02271]	5	UP
ENSGALT00000009301	3.07128	0.976791	1.65272	0.938712	chr20	9154648	9168515	DEPTOR	DEP_domain-containing_mTOR-interacting_protein_[Source:RefSeq_peptide;Acc:NP_001186431]	5	UP
ENSGALT00000044639	3.07128	0.976791	1.65272	0.938712	chr2	62969014	63001170	ADTRP	androgen-dependent_TFPI-regulating_protein_[Source:HGNC_Symbol;Acc:21214]	5	UP
ENSGALT00000038657	3.07128	0.976791	1.65272	0.938712	chr6	31560637	31561609	NKX1-2	NK1_homeobox_2_[Source:HGNC_Symbol;Acc:31652]	5	UP
ENSGALT00000045797	3.07128	0.976791	1.65272	0.938712	chr20	10237436	10245306	ANGPT4	angiopoietin_4_[Source:HGNC_Symbol;Acc:487]	5	UP
ENSGALT00000012763	3.07128	0.976791	1.65272	0.938712	chr2	17331977	17388781	ARMC3	armadillo_repeat_containing_3_[Source:HGNC_Symbol;Acc:30964]	5	UP
ENSGALT00000031518	3.07128	0.976791	1.65272	0.938712	chr16	291964	308585	BG2	intestinal_zipper_protein_[Source:RefSeq_peptide;Acc:NP_990767]	5	UP
ENSGALT00000037242	3.07128	0.976791	1.65272	0.938712	chr4	79509173	79510382	CCDC96	coiled-coil_domain_containing_96_[Source:HGNC_Symbol;Acc:26900]	5	UP
ENSGALT00000043649	3.07128	0.976791	1.65272	0.938712	-	-	-	CPNE5	copine_V_[Source:HGNC_Symbol;Acc:2318]	5	UP
ENSGALT00000044474	3.07128	0.976791	1.65272	0.938712	chr19	8674402	8674512	gga-mir-6639	gga-mir-6639_[Source:miRBase;Acc:MI0022458]	5	UP
ENSGALT00000012197	3.07128	0.976791	1.65272	0.938712	chr20	11503874	11517756	PGO2	Primglo2;_Uncharacterized_protein_[Source:UniProtKB/TrEMBL;Acc:Q4R1K1]	5	UP
ENSGALT00000042002	3.07128	0.976791	1.65272	0.938712	chr11	18179795	18179877	snoMBII-202	Small_nucleolar_RNA_MBII-202_[Source:RFAM;Acc:RF00324]	5	UP
ENSGALT00000042331	3.07128	0.976791	1.65272	0.938712	chr7	12074024	12074158	SNORA41	Small_nucleolar_RNA_SNORA41_[Source:RFAM;Acc:RF00403]	5	UP
ENSGALT00000041877	3.07128	0.976791	1.65272	0.938712	chr1	46520989	46521230	SNORA53	Small_nucleolar_RNA_SNORA53_[Source:RFAM;Acc:RF00563]	5	UP
ENSGALT00000045247	3.07128	0.976791	1.65272	0.938712	chr2	4036079	4036211	SNORA9	Small_nucleolar_RNA_SNORA9_[Source:RFAM;Acc:RF00411]	5	UP
ENSGALT00000026603	3.07128	0.976791	1.65272	0.938712	chr3	101958855	101964309	TDRD15	tudor_domain_containing_15_[Source:HGNC_Symbol;Acc:45037]	5	UP
ENSGALT00000007448	3.07128	0.976791	1.65272	0.938712	chr6	11475430	11484506	C10ORF54	C10ORF54	5	UP
NM_205138	3.09073	0.970643	1.67094	0.951354	chr2_JH375162_random	3056	4768	FOXC2	forkhead_box_C2_(MFH-1,_mesenchyme_forkhead_1)	5	UP
ENSGALT00000001231	15.3564	1663.48	6.75922	2.23e-22	chr1	193074487	193100754	WNT11	wingless-type_MMTV_integration_site_family,_member_11	5	DOWN
ENSGALT00000006759	4.09504	1052.98	8.00639	3.29e-21	chr23	5643782	5679530	GRHL3	grainyhead-like_3_(Drosophila)	5	DOWN
ENSGALT00000044204	11.2614	1178.99	6.71002	1.78e-19	chr1	193074479	193100099	WNT11	wingless-type_MMTV_integration_site_family,_member_11	5	DOWN
ENSGALT00000040200	314.294	6259.28	4.31581	6.26e-17	chr5	3505429	3506994	FIBIN	fin_bud_initiation_factor_homolog_(zebrafish)	5	DOWN
ENSGALT00000001070	2.04752	568.492	8.11712	2.57e-15	chr26	2265410	2276771	SLC26A9	solute_carrier_family_26,_member_9	5	DOWN
NM_001177555	960.188	6207.27	2.69257	2.05e-14	chr10	10272813	10325885	TRPM7	transient_receptor_potential_cation_channel,_subfamily_M,_member_7	5	DOWN
ENSGALT00000010884	695.133	7122.76	3.35707	6.22e-12	chr15	8768959	8794948	SLC5A1	solute_carrier_family_5_(sodium/glucose_cotransporter),_member_1	5	DOWN
ENSGALT00000023779	92.1384	1508.17	4.03285	7.89e-12	chr1	77385713	77417888	-	-	5	DOWN
ENSGALT00000030746	132.065	1824.65	3.7883	1.8e-11	chr12	9185918	9200490	GATA2	GATA_binding_protein_2	5	DOWN
NM_205488	105.085	1082.27	3.36443	3.94e-10	chr4	78388244	78390733	MSX1	msh_homeobox_1	5	DOWN
ENSGALT00000016253	227.275	2190.94	3.26904	8.97e-10	chr3	25951103	25982708	EPAS1	endothelial_PAS_domain_protein_1	5	DOWN
ENSGALT00000011263	175.063	1707.43	3.28588	2.7e-09	chr15	9053434	9084147	LIMK2	LIM_domain_kinase_2	5	DOWN
ENSGALT00000038774	974.62	6405.8	2.71647	1.14e-08	chr10	10272228	10327250	gga-mir-6596	gga-mir-6596_[Source:miRBase;Acc:MI0022416]	5	DOWN
ENSGALT00000038771	954.145	6246.58	2.71079	1.26e-08	chr10	10272812	10325885	gga-mir-6596	gga-mir-6596_[Source:miRBase;Acc:MI0022416]	5	DOWN
ENSGALT00000001712	295.867	2278.85	2.94529	1.63e-08	chr4	82973160	83026374	FGFR3	Fibroblast_growth_factor_receptor_3	5	DOWN
ENSGALT00000024209	104.424	1089.12	3.38265	1.8e-08	chr4	78388176	78390740	GHOX-7 (MSX1)	Homeobox_protein_GHOX-7_[Source:UniProtKB/Swiss-Prot;Acc:P50223]	5	DOWN
ENSGALT00000005668	404.385	2884.46	2.8345	2.08e-08	chrZ	11029528	11093852	SLC1A3	solute_carrier_family_1_(glial_high_affinity_glutamate_transporter),_member_3	5	DOWN
ENSGALT00000013430	5.1188	307.689	5.90952	2.18e-08	chr15	12207813	12219746	TBX3	T-box_3	5	DOWN
ENSGALT00000026140	377.768	2719.39	2.84771	2.21e-08	chr2	141549216	141589409	NDRG1	N-myc_downstream_regulated_gene_1	5	DOWN
ENSGALT00000003910	27.6415	520.63	4.23535	3.58e-08	chr10	390100	419904	ALPK3	Alpha-kinase_3	5	DOWN
ENSGALT00000036926	484.239	3190.2	2.71986	4.75e-08	chr1	83178849	83189463	ATP1B1	ATPase,_Na+/K+_transporting,_beta_1_polypeptide	5	DOWN
ENSGALT00000024583	478.096	3134.52	2.71287	5.33e-08	chr1	83178884	83189463	ATP1B1	ATPase,_Na+/K+_transporting,_beta_1_polypeptide	5	DOWN
ENSGALT00000024430	48.1167	650.543	3.75703	6.72e-08	chr2	105634158	105655438	DSC2	desmocollin_2	5	DOWN
ENSGALT00000016857	10.2376	346.761	5.08199	6.76e-08	chr9	22675158	22714986	ARHGEF26	Uncharacterized_protein_[Source:UniProtKB/TrEMBL;Acc:F1NBE4]	5	DOWN
ENSGALT00000027355	39.9267	584.121	3.87084	8.66e-08	chr1	154061424	154157924	LMO7	LIM_domain_7	5	DOWN
NM_001277704	47.3912	595.004	3.65021	9.27e-08	chr3	53787238	53796387	LOC421682/TP53 apoptosis effector	LOC421682	5	DOWN
ENSGALT00000026149	11.2614	348.714	4.95259	1e-07	chr2	141532749	141540007	WISP1	WNT1_inducible_signaling_pathway_protein_1	5	DOWN
ENSGALT00000044370	54.2593	671.055	3.62849	1.12e-07	chr3	53787118	53797292	-	-	5	DOWN
NR_035141	1174.48	4296.07	1.871	1.16e-07	chr2	22829674	22840957	MIR1650 (gga-mir-1650)	MIR1650	5	DOWN
ENSGALT00000018427	445.336	2781.9	2.64311	1.43e-07	chr3	41319932	41347556	FRMD1	FERM_domain_containing_1	5	DOWN
ENSGALT00000014601	398.243	2457.61	2.62553	2.4e-07	chr1	22980041	23008602	FAM3C	protein_FAM3C_[Source:RefSeq_peptide;Acc:NP_001091115]	5	DOWN
ENSGALT00000014709	52.2118	618.309	3.56588	3.02e-07	chr3	12135229	12217452	SPTLC3	serine_palmitoyltransferase,_long_chain_base_subunit_3	5	DOWN
ENSGALT00000044139	64.4969	679.847	3.39791	4.03e-07	chr1	62779915	62887409	RERG	RAS-like,_estrogen-regulated,_growth_inhibitor	5	DOWN
ENSGALT00000011214	148.445	1133.08	2.93224	4.15e-07	chr4	8634030	8650909	POF1B	premature_ovarian_failure,_1B	5	DOWN
ENSGALT00000026984	125.923	1010.98	3.00514	4.45e-07	chr1	129423876	129442045	PLCXD1	phosphatidylinositol-specific_phospholipase_C,_X_domain_containing_1	5	DOWN
ENSGALT00000008576	80.8771	766.781	3.24501	4.6e-07	chr20	8309310	8320262	C20ORF151	C20ORF151	5	DOWN
NM_204932	2710.57	8353.36	1.62376	5.6e-07	chrLGE22C19W28_N03011265_random	668	5043	KRT7	keratin_7_[Source:HGNC_Symbol;Acc:6445]	5	DOWN
ENSGALT00000009904	7.16632	269.594	5.23341	6.2e-07	chr6	17831516	17965896	ARHGAP22	Rho_GTPase_activating_protein_22	5	DOWN
ENSGALT00000016991	36.8554	488.395	3.7281	7.85e-07	chr9	23359471	23377519	CP	ceruloplasmin_(ferroxidase)	5	DOWN
ENSGALT00000017603	359.34	2053.21	2.51446	1.08e-06	chr5	44167559	44301305	ITPK1	inositol_1,3,4-triphosphate_5/6_kinase	5	DOWN
ENSGALT00000025873	104.424	844.924	3.01637	1.11e-06	chr1	107167342	107180491	ETS2	v-ets_erythroblastosis_virus_E26_oncogene_homolog_2_(avian)	5	DOWN
ENSGALT00000015678	334.77	1918.42	2.51868	1.28e-06	chr5	28899074	28914708	THBS1	thrombospondin_1	5	DOWN
ENSGALT00000027681	78.8296	706.22	3.16331	1.28e-06	chr1	178193452	178195286	GJB6	gap_junction_protein,_beta_6,_30kDa	5	DOWN
ENSGALT00000043221	242.631	1471.05	2.60001	1.65e-06	chr1	22979820	23107885	FAM3C	protein_FAM3C_[Source:RefSeq_peptide;Acc:NP_001091115]	5	DOWN
ENSGALT00000026863	384.934	2085.45	2.43768	1.98e-06	chr3	105851265	105973615	KIF13B	kinesin_family_member_13B	5	DOWN
ENSGALT00000016531	66.5444	619.285	3.21821	2.12e-06	chrZ	26415506	26430542	VLDLR	very_low_density_lipoprotein_receptor	5	DOWN
ENSGALT00000026444	221.132	1348.95	2.60885	2.14e-06	chr2	136937864	136952782	HAS2	hyaluronan_synthase_2	5	DOWN
ENSGALT00000003975	14.3326	306.712	4.41951	2.23e-06	chr10	380305	392708	SLC28A2	solute_carrier_family_28_(sodium-coupled_nucleoside_transporter),_member_2	5	DOWN
ENSGALT00000042664	189.396	1184.85	2.64523	2.75e-06	chr1	38160284	38171384	CSRP2	cysteine_and_glycine-rich_protein_2	5	DOWN
ENSGALT00000020565	677.729	3132.57	2.20856	5.6e-06	chrZ	40020751	40067183	SLC28A3	solute_carrier_family_28_(sodium-coupled_nucleoside_transporter),_member_3	5	DOWN
NM_001201448	171.021	900.757	2.39697	6.26e-06	chr1	50931985	50950143	MICALL1	MICAL-like_1	5	DOWN
ENSGALT00000008721	202.705	1173.13	2.53291	6.41e-06	chr2	3216849	3246773	ALS2CL	ALS2_C-terminal_like	5	DOWN
ENSGALT00000006404	76.782	617.332	3.00721	6.98e-06	chr18	7895217	7917904	AXIN2	axin_2	5	DOWN
NM_204932	1915.22	5454.05	1.50981	7.1e-06	chrLGE22C19W28_E50C23	709537	717763	KRT7	keratin_7_[Source:HGNC_Symbol;Acc:6445]	5	DOWN
ENSGALT00000023666	164.825	999.257	2.59992	7.7e-06	chrZ	56586635	56749770	FBN2	fibrillin_2	5	DOWN
ENSGALT00000021345	447.383	2143.08	2.2601	7.99e-06	chr1	62400841	62587151	CALD1	caldesmon_1	5	DOWN
ENSGALT00000027869	1578.64	6530.82	2.04858	9.14e-06	chr1	187466812	187482868	CTSC	cathepsin_C	5	DOWN
ENSGALT00000037589	292.795	1507.19	2.36389	9.26e-06	chr5	44170975	44307215	ITPK1	inositol_1,3,4-triphosphate_5/6_kinase	5	DOWN
ENSGALT00000021853	276.415	1436.86	2.37801	9.68e-06	chr1	15539605	15697582	CELSR1	cadherin,_EGF_LAG_seven-pass_G-type_receptor_1_(flamingo_homolog,_Drosophila)	5	DOWN
NM_001100286	249.319	1088.09	2.12573	1.33e-05	chr1	112491625	112511703	CYBB	cytochrome_b-245,_beta_polypeptide_(chronic_granulomatous_disease)	5	DOWN
ENSGALT00000023079	37.8791	391.693	3.37025	1.92e-05	chr4	68541427	68547721	RBM47	RNA_binding_motif_protein_47	5	DOWN
ENSGALT00000011883	39.9267	394.624	3.30505	2.42e-05	chr2	14820442	14835343	KIAA1462	KIAA1462	5	DOWN
ENSGALT00000016095	192.467	1016.84	2.40141	2.68e-05	chr4	30005288	30054123	GAB1	GRB2-associated_binding_protein_1	5	DOWN
ENSGALT00000045482	1843.79	6973.31	1.91917	2.8e-05	chr2	136104591	136163412	ENPP2	ectonucleotide_pyrophosphatase/phosphodiesterase_2_(autotaxin)	5	DOWN
ENSGALT00000026501	1828.44	6886.38	1.91313	2.98e-05	chr2	136108199	136163574	ENPP2	ectonucleotide_pyrophosphatase/phosphodiesterase_2_(autotaxin)	5	DOWN
NM_001277811	3.09073	181.51	5.87596	3.08e-05	chr1	181149304	181289326	PDGFD	platelet_derived_growth_factor_D	5	DOWN
ENSGALT00000012430	446.36	1935.02	2.11607	3.15e-05	chr20	12026080	12069868	BMP7	bone_morphogenetic_protein_7	5	DOWN
ENSGALT00000024326	361.387	1619.52	2.16395	3.35e-05	chr1	80216649	80227498	UPK1B	uroplakin_1B	5	DOWN
ENSGALT00000019050	2.04752	145.542	6.15141	3.73e-05	chr5	51711520	51736637	AHNAK2	AHNAK_nucleoprotein_2	5	DOWN
ENSGALT00000020033	169.944	906.462	2.41519	3.75e-05	chr1	50931991	50950143	GGA.5175	MICAL-like_protein_1_[Source:RefSeq_peptide;Acc:NP_001188377]	5	DOWN
ENSGALT00000020035	170.968	898.648	2.39403	4.42e-05	chr1	50931991	50950143	GGA.5175	MICAL-like_protein_1_[Source:RefSeq_peptide;Acc:NP_001188377]	5	DOWN
ENSGALT00000023275	15.3564	245.175	3.9969	4.87e-05	chr1	76166945	76245007	CASR	calcium-sensing_receptor	5	DOWN
ENSGALT00000017218	125.923	722.825	2.52111	4.91e-05	chr3	31428644	31485527	STRN	striatin,_calmodulin_binding_protein	5	DOWN
ENSGALT00000012104	106.471	635.891	2.57832	6.21e-05	chr4	11178096	11207186	ZNF185	zinc_finger_protein_185_(LIM_domain)_[Source:HGNC_Symbol;Acc:12976]	5	DOWN
ENSGALT00000032981	232.394	1089.12	2.22852	6.56e-05	chr9	22146849	22157886	C3ORF55	Uncharacterized_protein_[Source:UniProtKB/TrEMBL;Acc:E1C8D5]	5	DOWN
ENSGALT00000037239	23.5465	281.316	3.57861	7.24e-05	chr2	64735014	64854227	RREB1	ras_responsive_element_binding_protein_1	5	DOWN
ENSGALT00000030620	1.02376	122.099	6.89803	7.83e-05	chr1	48184763	48198006	EMP1	Epithelial_membrane_protein_1	5	DOWN
ENSGALT00000016170	179.158	883.019	2.30121	8.3e-05	chr1	35273570	35305258	CPM	carboxypeptidase_M	5	DOWN
ENSGALT00000023263	30.7128	308.666	3.32913	9.7e-05	chr4	73626291	73691855	PPARGC1A	peroxisome_proliferator-activated_receptor_gamma,_coactivator_1_alpha	5	DOWN
ENSGALT00000044093	210.895	971.907	2.2043	0.000109259	chr2	63369799	63390380	TFAP2A	transcription_factor_AP-2_alpha_(activating_enhancer_binding_protein_2_alpha)	5	DOWN
ENSGALT00000020844	226.251	1023.68	2.17776	0.000109807	chr2	63369712	63390425	TFAP2A	transcription_factor_AP-2_alpha_(activating_enhancer_binding_protein_2_alpha)	5	DOWN
ENSGALT00000037052	76.782	495.233	2.68927	0.000110427	chr3	82230622	82296804	COL9A1	collagen,_type_IX,_alpha_1	5	DOWN
ENSGALT00000045837	35.8316	328.202	3.19528	0.000110842	chr1	144576578	144648440	MBNL2	Muscleblind-like_2_(Drosophila)	5	DOWN
ENSGALT00000026222	247.75	1094.98	2.14395	0.00011146	chr1	112491624	112511703	NOX2	cytochrome_b-245,_beta_polypeptide_[Source:RefSeq_peptide;Acc:NP_001093756]	5	DOWN
ENSGALT00000030196	37.8791	336.016	3.14905	0.000115508	chr1	144576578	144648440	MBNL2	Muscleblind-like_2_(Drosophila)	5	DOWN
ENSGALT00000042993	37.8791	336.016	3.14905	0.000115508	chr1	144576578	144648440	MBNL2	Muscleblind-like_2_(Drosophila)	5	DOWN
ENSGALT00000011206	175.063	842.971	2.26761	0.000118916	chr18	9578500	9607509	BAIAP2	BAI1-associated_protein_2	5	DOWN
ENSGALT00000013777	6.14256	166.054	4.75667	0.000120589	chr1	10867381	10986273	SEMA3C	sema_domain,_immunoglobulin_domain_(Ig),_short_basic_domain,_secreted,_(semaphorin)_3C	5	DOWN
ENSGALT00000043423	724.822	2627.57	1.85803	0.000130755	chr2	136134361	136163574	ENPP2	ectonucleotide_pyrophosphatase/phosphodiesterase_2_(autotaxin)	5	DOWN
ENSGALT00000012517	478.096	1827.58	1.93456	0.000136009	chr15	10038153	10064717	AIFM3	apoptosis-inducing_factor,_mitochondrion-associated,_3	5	DOWN
ENSGALT00000043503	42.9979	352.622	3.03578	0.000136981	chr2	284907	288944	SLC4A2	solute_carrier_family_4,_anion_exchanger,_member_2_(erythrocyte_membrane_protein_band_3-like_1)	5	DOWN
ENSGALT00000010350	53.2355	392.67	2.88286	0.00014484	chr4	4328297	4331251	VGLL1	vestigial_like_1_(Drosophila)	5	DOWN
ENSGALT00000012401	2.04752	126.006	5.94347	0.000150052	chr4	12065413	12074015	CDXB (CDX4)	caudal_type_homeobox_4_[Source:RefSeq_peptide;Acc:NP_989945]	5	DOWN
ENSGALT00000024196	7182.7	22927.2	1.67446	0.000150365	chr1	79683347	79701497	ATP1A1	ATPase,_Na+/K+_transporting,_alpha_1_polypeptide	5	DOWN
ENSGALT00000003488	11.2614	196.335	4.12386	0.000153526	chr21	2919060	2959863	SAMD11	sterile_alpha_motif_domain_containing_11	5	DOWN
ENSGALT00000004448	54.2593	394.624	2.86253	0.000153649	chr19	5305961	5329691	SLC43A2	solute_carrier_family_43,_member_2	5	DOWN
ENSGALT00000046080	34.8079	312.573	3.16671	0.000160953	chr1	144576578	144648440	MBNL2	Muscleblind-like_2_(Drosophila)	5	DOWN
ENSGALT00000019398	354.221	1406.58	1.98947	0.000161067	chr2	43743130	43753642	TGM4	transglutaminase_4_(prostate)	5	DOWN
ENSGALT00000014476	65.5207	435.649	2.73314	0.00016495	chr7	13656873	13697980	SSFA2	Sperm_specific_antigen_2	5	DOWN
ENSGALT00000043812	36.8554	317.457	3.10661	0.000183619	chr1	144576578	144648440	MBNL2	Muscleblind-like_2_(Drosophila)	5	DOWN
ENSGALT00000040124	9.21384	178.753	4.27802	0.000197023	chr21	2919339	2940124	SAMD11	sterile_alpha_motif_domain_containing_11	5	DOWN
ENSGALT00000016231	512.904	1880.32	1.87422	0.00019847	chr8	18585119	18597571	ELOVL1	elongation_of_very_long_chain_fatty_acids_(FEN1/Elo2,_SUR4/Elo3,_yeast)-like_1	5	DOWN
ENSGALT00000036925	275.392	1122.33	2.02694	0.000218893	chr3	95424294	95426233	ID2	inhibitor_of_DNA_binding_2,_dominant_negative_helix-loop-helix_protein	5	DOWN
ENSGALT00000027566	8.19008	169.962	4.37519	0.000221385	chr1	173241711	173493625	STARD13	StAR-related_lipid_transfer_(START)_domain_containing_13	5	DOWN
ENSGALT00000039803	154.588	731.616	2.24266	0.000222143	chrZ	334045	366833	ATP8B1	ATPase,_class_I,_type_8B,_member_1	5	DOWN
ENSGALT00000006204	1.02376	108.424	6.72666	0.000225433	chr7	4722131	4739842	MLPH	melanophilin	5	DOWN
ENSGALT00000010639	62.4494	410.252	2.71575	0.000234878	chr24	3487205	3516376	SORL1	sortilin-related_receptor,_L(DLR_class)_A_repeats-containing	5	DOWN
ENSGALT00000003290	117.732	603.657	2.35822	0.000241333	chr18	4530722	4546873	-	-	5	DOWN
ENSGALT00000006103	2834.79	8899.54	1.65049	0.000243012	chr27	4549327	4553968	KRT19	keratin_19	5	DOWN
ENSGALT00000044342	1.02376	107.447	6.7136	0.000243275	chr7	4722131	4739842	MLPH	melanophilin	5	DOWN
ENSGALT00000018021	114.661	591.935	2.36806	0.000247357	chr7	19544323	19617293	COBLL1	COBL-like_1	5	DOWN
ENSGALT00000004144	175.063	791.201	2.17617	0.000247841	chr19	5053526	5066507	TMEM248	Uncharacterized_protein_[Source:UniProtKB/TrEMBL;Acc:F1NH62]	5	DOWN
ENSGALT00000011624	107.495	565.562	2.39542	0.000257252	chr9	12558090	12591471	ATP13A4	ATPase_type_13A4	5	DOWN
ENSGALT00000040078	60.4019	398.531	2.72203	0.00026144	chr17	2410446	2426122	FAM129B	Family_with_sequence_similarity_129,_member_B	5	DOWN
ENSGALT00000016667	2742.65	8555.71	1.64132	0.000266482	-	-	-	-	-	5	DOWN
ENSGALT00000021553	106.471	555.794	2.38409	0.000290704	chr5	52023887	52086423	JAG2	jagged_2	5	DOWN
ENSGALT00000007686	396.195	1451.51	1.87327	0.000326598	chr11	9471252	9488757	RHPN2	rhophilin,_Rho_GTPase_binding_protein_2	5	DOWN
ENSGALT00000004288	5.1188	141.635	4.79022	0.000329924	-	-	-	AQP5	aquaporin_5	5	DOWN
ENSGALT00000045259	33.7841	286.2	3.08261	0.000341555	chr1	144576578	144648440	MBNL2	Muscleblind-like_2_(Drosophila)	5	DOWN
ENSGALT00000009088	25.594	250.058	3.28839	0.000357665	chr5	8423160	8425797	ADM	adrenomedullin	5	DOWN
ENSGALT00000037261	39.9267	308.666	2.95062	0.000368287	chr3	67545633	67588418	AIM1	absent_in_melanoma_1	5	DOWN
ENSGALT00000044192	80.8771	457.138	2.49883	0.000371796	chr2	15230157	15236740	BAMBI	BMP_and_activin_membrane-bound_inhibitor_homolog_(Xenopus_laevis)	5	DOWN
ENSGALT00000001374	80.8771	455.185	2.49265	0.000388699	chr25	2103605	2117226	TUFT1	Tuftelin_1	5	DOWN
ENSGALT00000036628	8.19008	159.217	4.28097	0.000401619	chr1	120363891	120406308	NHS	Nance-Horan_syndrome_(congenital_cataracts_and_dental_anomalies)	5	DOWN
ENSGALT00000010664	26.6178	249.082	3.22616	0.000440264	chr1	7422960	7518502	KIAA1324L	KIAA1324-like	5	DOWN
ENSGALT00000012986	5.1188	136.751	4.7396	0.000446785	chr1	14597268	14618545	SLC26A4	solute_carrier_family_26,_member_4	5	DOWN
NM_001277984	129.811	568.797	2.1315	0.000505452	chr27	4625548	4629420	LOC100858439/ keratin 14-like	LOC100858439	5	DOWN
ENSGALT00000019784	22.5227	227.592	3.337	0.000507964	chr7	27874840	27876426	TMEM37	transmembrane_protein_37	5	DOWN
ENSGALT00000020759	357.292	1262.01	1.82055	0.00060731	chr1	54742739	54768918	TXNRD1	thioredoxin_reductase_1	5	DOWN
ENSGALT00000014862	24.5703	229.546	3.2238	0.000668722	chr2	24580153	24582822	DLX5	distal-less_homeobox_5	5	DOWN
ENSGALT00000010080	30.7128	252.012	3.03658	0.00073579	chr12	10475438	10492889	SLC41A3	solute_carrier_family_41,_member_3_[Source:HGNC_Symbol;Acc:31046]	5	DOWN
ENSGALT00000006501	75.7583	408.299	2.43015	0.000776607	chr10	5850093	6086027	THSD4	thrombospondin,_type_I,_domain_containing_4	5	DOWN
ENSGALT00000013873	508.809	1652.73	1.69966	0.000805984	chr17	1933419	1939035	-	-	5	DOWN
ENSGALT00000026780	7.16632	139.681	4.28476	0.000848284	chr1	122869210	122893310	PRPS2	phosphoribosyl_pyrophosphate_synthetase_2	5	DOWN
ENSGALT00000002051	33.7841	259.826	2.94313	0.000849247	chr26	3056479	3075970	LAMB3	laminin,_beta_3	5	DOWN
ENSGALT00000005846	130.018	570.446	2.13338	0.000879659	chr27	4625661	4629416	-	-	5	DOWN
ENSGALT00000046117	60.4019	351.645	2.54145	0.000905592	chr5	28673486	28690778	BMF	bcl-2-modifying_factor_[Source:RefSeq_peptide;Acc:NP_001106763]	5	DOWN
ENSGALT00000015759	15.3564	180.706	3.55673	0.000944141	chr9	22173836	22221855	VEPH1	ventricular_zone_expressed_PH_domain-containing_1_[Source:HGNC_Symbol;Acc:25735]	5	DOWN
ENSGALT00000012496	436.122	1420.25	1.70335	0.00100919	chr7	7514673	7600060	MYO1B	myosin_IB	5	DOWN
ENSGALT00000016528	28.6653	234.43	3.03178	0.00104324	chrZ	26195619	26294557	SMARCA2	SWI/SNF_related,_matrix_associated,_actin_dependent_regulator_of_chromatin,_subfamily_a,_member_2	5	DOWN
ENSGALT00000016670	1752.68	4959.17	1.50054	0.0010475	-	-	-	-	-	5	DOWN
ENSGALT00000043833	9.21384	147.495	4.00072	0.00106047	chr1	175315017	175317966	CDX2	caudal_type_homeobox_2	5	DOWN
ENSGALT00000037876	4.09504	113.308	4.79022	0.00124352	chr1	50582286	50593266	PDGFB	platelet-derived_growth_factor_beta_polypeptide_(simian_sarcoma_viral_(v-sis)_oncogene_homolog)	5	DOWN
ENSGALT00000026003	341.936	1134.05	1.72969	0.00129412	chr1	108297492	108311113	TMPRSS2	transmembrane_protease,_serine_2	5	DOWN
ENSGALT00000026117	82.9246	405.368	2.28936	0.00139996	chr1	109234441	109247196	SIK1	salt-inducible_kinase_1	5	DOWN
ENSGALT00000001354	282.558	965.07	1.77209	0.00140777	chr25	2093994	2102545	CGN	cingulin	5	DOWN
ENSGALT00000040292	4.09504	111.354	4.76513	0.00141343	chr26	3082073	3082959	G0S2	G0/G1switch_2_[Source:RefSeq_peptide;Acc:NP_001177853]	5	DOWN
ENSGALT00000031460	343.984	1127.22	1.71235	0.00144731	chr26	807345	844130	PKP1	plakophilin_1_(ectodermal_dysplasia/skin_fragility_syndrome)	5	DOWN
ENSGALT00000025800	44.0217	279.362	2.66585	0.00148547	chr1	105292500	105299313	RCAN1	regulator_of_calcineurin_1	5	DOWN
ENSGALT00000017962	121.827	516.722	2.08455	0.00149472	chr3	38475375	38612626	SIPA1L2	signal-induced_proliferation-associated_1_like_2	5	DOWN
NM_001270816	18.5444	201.894	3.44454	0.00149742	chr1	178213256	178213933	GJB2	GJB2	5	DOWN
ENSGALT00000008413	75.7583	379.972	2.32642	0.00152034	chr12	6695374	6799774	FGD3	FYVE,_RhoGEF_and_PH_domain_containing_3	5	DOWN
ENSGALT00000020588	3338.48	8866.33	1.40914	0.00158995	chrZ	41267478	41272899	CTSL2	cathepsin_L2	5	DOWN
ENSGALT00000025116	1915.46	5183.83	1.43633	0.00162517	chr6	30810572	30839263	HTRA1	Uncharacterized_protein_[Source:UniProtKB/TrEMBL;Acc:F1ND64]	5	DOWN
ENSGALT00000015707	161.754	622.216	1.94361	0.00167431	chr3	19553877	19675355	ESRRG	estrogen-related_receptor_gamma	5	DOWN
ENSGALT00000010570	276.415	928.928	1.74873	0.0017332	chr2	9467166	9532244	ESYT2	Uncharacterized_protein_[Source:UniProtKB/TrEMBL;Acc:F1NW18]	5	DOWN
ENSGALT00000014128	8.19008	131.867	4.00906	0.00184442	chr8	15253515	15275599	SYDE2	Synapse_defective_1,_Rho_GTPase,_homolog_2_(C._elegans)	5	DOWN
ENSGALT00000031766	1409.72	3822.18	1.43899	0.00190707	chr3	55463038	55468606	SGK1	serum/glucocorticoid_regulated_kinase_1	5	DOWN
ENSGALT00000044087	82.9246	390.716	2.23625	0.00195049	chrZ	59156359	59170693	ARRDC3	arrestin_domain_containing_3	5	DOWN
ENSGALT00000008888	17.4039	172.892	3.31239	0.00202977	chr5	7466933	7519456	MICAL2	microtubule_associated_monoxygenase,_calponin_and_LIM_domain_containing_2	5	DOWN
ENSGALT00000025518	173.016	639.798	1.88672	0.00203928	chr1	103417899	103443811	BACH1	BTB_and_CNC_homology_1,_basic_leucine_zipper_transcription_factor_1	5	DOWN
ENSGALT00000042714	20.4752	184.613	3.17256	0.00209738	chr14	9182193	9204188	EMP2	epithelial_membrane_protein_2	5	DOWN
ENSGALT00000037748	14.3326	158.24	3.46474	0.00217604	chr2	38105960	38419508	RARB	retinoic_acid_receptor,_beta	5	DOWN
ENSGALT00000041400	292.795	947.487	1.69421	0.00223512	chr2	108189926	108193054	C8ORF22	C8ORF22	5	DOWN
ENSGALT00000007808	857.911	2380.44	1.47233	0.00223515	chr21	6450515	6459194	SLC2A1	solute_carrier_family_2_(facilitated_glucose_transporter),_member_1	5	DOWN
ENSGALT00000019146	18.4277	174.846	3.24613	0.00224173	chr1	47722679	47743419	-	-	5	DOWN
ENSGALT00000019898	46.0692	272.525	2.56451	0.00225081	chr7	29769773	29831929	MGAT5	mannosyl_(alpha-1,6-)-glycoprotein_beta-1,6-N-acetyl-glucosaminyltransferase	5	DOWN
ENSGALT00000019179	40.9504	254.942	2.63822	0.00231549	chr7	27064564	27359838	KALRN	kalirin,_RhoGEF_kinase	5	DOWN
ENSGALT00000029195	18.4277	173.869	3.23805	0.00233914	chr7	25539596	25568408	TFCP2L1	transcription_factor_CP2-like_1	5	DOWN
ENSGALT00000024433	142.303	546.026	1.94001	0.00241912	chr2	105785434	105800639	DSG2	desmoglein_2	5	DOWN
ENSGALT00000006265	110.566	456.161	2.04463	0.00256822	chr20	5472059	5486605	SDC4	Syndecan-4_[Source:UniProtKB/Swiss-Prot;Acc:P49416]	5	DOWN
ENSGALT00000022919	339.888	1052.98	1.63135	0.00258464	chr1	193979552	194000178	-	-	5	DOWN
ENSGALT00000018724	85.9959	384.856	2.16198	0.00271393	chr4	49156408	49291621	SHROOM3	shroom_family_member_3	5	DOWN
ENSGALT00000017221	518.023	1489.61	1.52384	0.00278581	chr5	40218336	40245761	SEL1L	sel-1_suppressor_of_lin-12-like_(C._elegans)	5	DOWN
ENSGALT00000044516	2354.65	5983.82	1.34556	0.00287884	chr1	75366744	75371263	NANOG	nanog_homeobox	5	DOWN
ENSGALT00000026988	4256.8	10584.5	1.31411	0.00300567	chr1	129470050	129482680	RGN	regucalcin	5	DOWN
ENSGALT00000033690	214.99	720.872	1.74548	0.00303104	chr6	11331409	11360275	UNC5B	unc-5_homolog_B_(C._elegans)	5	DOWN
ENSGALT00000019885	4.09504	99.6327	4.60467	0.00305224	chr1	50582854	50594411	PDGFB	platelet-derived_growth_factor_beta_polypeptide_(simian_sarcoma_viral_(v-sis)_oncogene_homolog)	5	DOWN
ENSGALT00000023921	296.891	926.975	1.6426	0.00306455	chr2	100699720	100729685	EMILIN2	elastin_microfibril_interfacer_2	5	DOWN
ENSGALT00000022297	33.7841	222.708	2.72074	0.00306627	chr4	63979466	64199133	DLC1	deleted_in_liver_cancer_1	5	DOWN
ENSGALT00000026309	187.348	647.612	1.78941	0.00313046	chr2	139316927	139321894	MYC	v-myc_myelocytomatosis_viral_oncogene_homolog_(avian)	5	DOWN
ENSGALT00000020934	1595.02	4082.99	1.35605	0.00321568	chr1	56701685	56735737	AKR1D1	aldo-keto_reductase_family_1,_member_D1_(delta_4-3-ketosteroid-5-beta-reductase)	5	DOWN
ENSGALT00000024333	3.07128	91.8184	4.90187	0.00323921	chr1	80278966	80367961	IGSF11	immunoglobulin_superfamily,_member_11	5	DOWN
ENSGALT00000023163	44.0217	253.966	2.52835	0.00325158	chr4	69444998	69466051	RELL1	RELT-like_1	5	DOWN
ENSGALT00000036439	16.3802	157.263	3.26316	0.00338981	chr1	178210943	178217940	-	-	5	DOWN
ENSGALT00000023454	103.4	419.043	2.01887	0.00363132	chr5	28676053	28690778	BMF	bcl-2-modifying_factor_[Source:RefSeq_peptide;Acc:NP_001106763]	5	DOWN
ENSGALT00000024089	134.113	499.14	1.896	0.00370351	chr2	101998424	102069513	-	-	5	DOWN
ENSGALT00000020826	529.284	1473	1.47664	0.00372416	chr1	55671165	55703413	GNPTAB	N-acetylglucosamine-1-phosphate_transferase,_alpha_and_beta_subunits	5	DOWN
ENSGALT00000023808	17.4039	158.24	3.18463	0.00388852	chr1	77852890	77868563	STYK1	serine/threonine/tyrosine_kinase_1	5	DOWN
ENSGALT00000006774	45.0455	249.082	2.46717	0.00415939	chr5	1561280	1568324	PKP3	plakophilin_3	5	DOWN
ENSGALT00000020646	57.3306	285.223	2.31471	0.00418765	chr2	56365652	56391148	KCNG2	potassium_voltage-gated_channel,_subfamily_G,_member_2	5	DOWN
ENSGALT00000011134	38.9029	228.569	2.55468	0.00437858	chr5	15253047	15259679	RASSF7	Ras_association_(RalGDS/AF-6)_domain_family_7	5	DOWN
ENSGALT00000002132	73.7108	327.225	2.15034	0.00465222	chr15	231309	299936	HIC2	hypermethylated_in_cancer_2	5	DOWN
ENSGALT00000018715	4.09504	91.8184	4.48683	0.00510256	chr7	22892060	22970055	MARCH4	membrane-associated_ring_finger_(C3HC4)_4	5	DOWN
ENSGALT00000036134	149.469	514.769	1.78408	0.00546692	chr19	714994	715639	CLDN3	claudin_3	5	DOWN
ENSGALT00000044759	247.75	753.106	1.60397	0.00547303	chr12	203477	212534	DUSP7	Uncharacterized_protein_[Source:UniProtKB/TrEMBL;Acc:F1NUJ4]	5	DOWN
ENSGALT00000027364	961.311	2406.81	1.32405	0.00560491	chr1	155257164	155276151	KLF5	Kruppel-like_factor_5_(intestinal)	5	DOWN
ENSGALT00000012208	132.065	469.836	1.83091	0.00561752	chr5	16419318	16477175	TPCN2	two_pore_segment_channel_2	5	DOWN
NM_001256499	96.843	378.551	1.96677	0.00571375	chr2	63335623	63339141	LOC420860/transmembrane protein 14c-like	hypothetical_LOC420860	5	DOWN
ENSGALT00000005981	653.159	1692.78	1.37389	0.00573685	chr10	4583466	4605541	ANXA2	annexin_A2	5	DOWN
ENSGALT00000038374	484.239	1300.11	1.42484	0.00583508	chr5	22949352	22992334	DGKZ	diacylglycerol_kinase,_zeta_104kDa	5	DOWN
ENSGALT00000018268	1.02376	67.3986	6.04077	0.00593072	chr1	42864375	42915866	KITLG	KIT_ligand	5	DOWN
ENSGALT00000024687	7.16632	105.493	3.87978	0.00611299	chr3	66702482	66716393	FOXO3	forkhead_box_O3	5	DOWN
ENSGALT00000033891	8.19008	110.377	3.75242	0.00611519	chr15	8481374	8491459	ADORA2A	adenosine_A2a_receptor	5	DOWN
ENSGALT00000021113	29.6891	189.497	2.67418	0.00618195	chr1	59564531	59674959	DENND5B	DENN/MADD_domain_containing_5B	5	DOWN
ENSGALT00000026486	275.392	806.829	1.55078	0.00623448	chr3	95690441	95751830	ASAP2	Uncharacterized_protein_[Source:UniProtKB/TrEMBL;Acc:F1NKX8]	5	DOWN
ENSGALT00000021101	339.888	948.464	1.48053	0.00676481	chr1	59449077	59458058	C12ORF35	C12ORF35	5	DOWN
ENSGALT00000044666	41.9742	222.708	2.40758	0.00708171	chr3	53805126	53822823	PERP	PERP,_TP53_apoptosis_effector	5	DOWN
ENSGALT00000026520	124.899	438.579	1.81208	0.00712997	chr3	96021130	96056953	GRHL1	grainyhead-like_1_(Drosophila)	5	DOWN
ENSGALT00000010708	12.2851	125.029	3.34728	0.00715222	chr6	19941319	19946482	RBP4	retinol_binding_protein_4,_plasma	5	DOWN
ENSGALT00000005683	50.1643	245.175	2.28908	0.00726304	chr22	2614340	2660633	CHANK1	Ankyrin_1;_Uncharacterized_protein_[Source:UniProtKB/TrEMBL;Acc:Q90715]	5	DOWN
ENSGALT00000031304	10.2376	116.238	3.50513	0.00728127	chr2	2459541	2541875	WNT3A	Protein_Wnt-3a_[Source:UniProtKB/Swiss-Prot;Acc:Q2LMP1]	5	DOWN
ENSGALT00000013087	22.5227	161.171	2.83913	0.00746905	chr1	14328389	14346800	PRKAR2B	protein_kinase,_cAMP-dependent,_regulatory,_type_II,_beta	5	DOWN
ENSGALT00000026449	89.0672	346.761	1.96098	0.00750324	chr2	136546689	136654781	SNTB1	syntrophin,_beta_1_(dystrophin-associated_protein_A1,_59kDa,_basic_component_1)	5	DOWN
ENSGALT00000014350	40.9504	217.824	2.41122	0.00752057	chr3	14447218	14450083	BMP2	bone_morphogenetic_protein_2	5	DOWN
ENSGALT00000017890	231.37	687.661	1.5715	0.00752259	chr3	37178195	37213970	NID1	nidogen_1	5	DOWN
ENSGALT00000019307	201.681	617.332	1.61397	0.00763712	chr4	52293414	52334335	ANKRD50	ankyrin_repeat_domain_50	5	DOWN
ENSGALT00000024288	10.2376	115.261	3.49296	0.00766167	chr3	65969394	65975774	DDO	D-aspartate_oxidase	5	DOWN
ENSGALT00000006100	120.804	423.927	1.81115	0.00775421	chr27	4618777	4622608	KRT14	keratin_14	5	DOWN
ENSGALT00000043443	27.6415	176.799	2.6772	0.00775915	chr2	92627799	92630335	CBLN2	cerebellin_2	5	DOWN
ENSGALT00000027432	5.1188	89.8648	4.13388	0.00838211	chr1	167080642	167087881	SLC25A30	solute_carrier_family_25,_member_30	5	DOWN
ENSGALT00000031303	10.2376	113.308	3.4683	0.00848243	chr2	2459533	2542486	WNT3A	Protein_Wnt-3a_[Source:UniProtKB/Swiss-Prot;Acc:Q2LMP1]	5	DOWN
ENSGALT00000024318	16.3802	136.751	3.06153	0.00854694	chr1	80085284	80088616	-	-	5	DOWN
ENSGALT00000009118	77.8058	310.62	1.9972	0.00889016	chr19	9131389	9186283	KSR1	kinase_suppressor_of_ras_1	5	DOWN
ENSGALT00000037662	272.32	761.897	1.48429	0.00937687	chr4	57807175	57923545	PDLIM5	PDZ_and_LIM_domain_5	5	DOWN
ENSGALT00000000815	116.709	403.415	1.78935	0.00942952	chr26	367098	397261	-	-	5	DOWN
ENSGALT00000020674	117.732	405.368	1.78372	0.00951677	chr1	54372186	54405331	-	-	5	DOWN
ENSGALT00000018323	3.07128	76.1897	4.63268	0.00960611	chr7	21555003	21556682	INHA	inhibin,_alpha	5	DOWN
ENSGALT00000000695	253.893	716.965	1.49768	0.00974985	chr23	188095	199912	AIM1L	absent_in_melanoma_1-like	5	DOWN
ENSGALT00000003446	354.221	938.696	1.40601	0.00991182	chr14	13254972	13275561	PPL	periplakin	5	DOWN
ENSGALT00000017356	161.754	505.001	1.64248	0.0101031	chr4	39331593	39416540	WWC2	WW_and_C2_domain_containing_2	5	DOWN
ENSGALT00000020668	80.8771	312.573	1.95039	0.0101475	chr1	53895863	53940812	NUAK1	NUAK_family,_SNF1-like_kinase,_1	5	DOWN
ENSGALT00000011465	26.6178	166.054	2.64119	0.0102848	chr2	12793546	12910204	CCNY	cyclin_Y	5	DOWN
ENSGALT00000043298	1.02376	60.561	5.88644	0.0103476	chr1	42864375	42915866	KITLG	KIT_ligand	5	DOWN
ENSGALT00000027123	182.229	548.957	1.59094	0.0105452	chr1	134781802	134837592	UXS1	UDP-glucuronate_decarboxylase_1	5	DOWN
ENSGALT00000016809	66.5444	274.478	2.0443	0.0106596	chr5	37575336	37599366	FLVCR2	feline_leukemia_virus_subgroup_C_cellular_receptor_family,_member_2	5	DOWN
ENSGALT00000011955	149.469	471.79	1.6583	0.0109108	chr12	13713808	13779455	ADAMTS9	ADAM_metallopeptidase_with_thrombospondin_type_1_motif,_9	5	DOWN
ENSGALT00000023578	37.8791	197.312	2.381	0.0109498	chr12	15329788	15396454	FRMD4B	FERM_domain_containing_4B	5	DOWN
ENSGALT00000002426	28.6653	169.962	2.56783	0.0111992	chr21	2297829	2331951	DVL1	dishevelled,_dsh_homolog_1_(Drosophila)	5	DOWN
ENSGALT00000003484	92.1384	334.063	1.85824	0.0115852	chr19	4478901	4502458	RFFL	ring_finger_and_FYVE-like_domain_containing_1	5	DOWN
ENSGALT00000038697	2.04752	66.4218	5.01971	0.0120376	chr6	30850163	30865241	-	-	5	DOWN
ENSGALT00000025078	56.3068	242.244	2.10508	0.0124863	chr4	80001880	80095152	-	-	5	DOWN
ENSGALT00000044128	75.7583	290.107	1.93711	0.012734	chr23	2169482	2170150	ID3	inhibitor_of_DNA_binding_3,_dominant_negative_helix-loop-helix_protein	5	DOWN
ENSGALT00000024478	64.4969	260.803	2.01566	0.0132125	chrZ	37221305	37222586	GCNT1	glucosaminyl_(N-acetyl)_transferase_1,_core_2_(beta-1,6-N-acetylglucosaminyltransferase)	5	DOWN
ENSGALT00000000071	70.6395	275.455	1.96327	0.0133916	chr4	59708726	59730688	DAPP1	dual_adaptor_of_phosphotyrosine_and_3-phosphoinositides	5	DOWN
ENSGALT00000004672	398.243	997.304	1.32438	0.0135728	chr11	2028572	2035308	SLC12A3	solute_carrier_family_12_(sodium/chloride_transporters),_member_3	5	DOWN
ENSGALT00000017056	522.118	1256.15	1.26657	0.0139173	chr8	20794710	20799010	PDZK1IP1	PDZK1_interacting_protein_1	5	DOWN
ENSGALT00000045418	388.005	970.93	1.32329	0.0140993	-	-	-	KRT18	keratin_18_[Source:HGNC_Symbol;Acc:6430]	5	DOWN
ENSGALT00000020982	1.02376	56.6539	5.79022	0.0142354	chr2	67753129	67763712	SERPINB2	serpin_peptidase_inhibitor,_clade_B_(ovalbumin),_member_2	5	DOWN
ENSGALT00000030920	8.19008	94.7487	3.53216	0.014535	chr2	104126304	104127381	CHST9	Uncharacterized_protein_[Source:UniProtKB/TrEMBL;Acc:F1NIN6]	5	DOWN
ENSGALT00000043690	11.2614	106.47	3.241	0.0147902	chr4	57404742	57409306	PITX2	paired-like_homeodomain_2	5	DOWN
ENSGALT00000034383	62.4494	251.035	2.00713	0.0148916	chr9	470932	487202	EFHD1	EF-hand_domain_family,_member_D1	5	DOWN
ENSGALT00000017920	293.819	764.827	1.38021	0.0149004	chr3	38006260	38036746	KCNK1	potassium_channel,_subfamily_K,_member_1	5	DOWN
ENSGALT00000046134	102.376	345.784	1.75599	0.0149378	chr14	6742070	6744272	CACNG3	calcium_channel,_voltage-dependent,_gamma_subunit_3	5	DOWN
ENSGALT00000010589	51.188	221.732	2.11494	0.0153317	chr2	9540586	9570127	WDR60	WD_repeat_domain_60	5	DOWN
ENSGALT00000002921	290.748	753.106	1.37308	0.0157147	chr19	4176615	4178279	-	-	5	DOWN
ENSGALT00000036617	15.3564	119.169	2.95609	0.016092	chr1	123651001	123765375	ARHGAP6	Rho_GTPase_activating_protein_6	5	DOWN
ENSGALT00000027449	66.5444	256.896	1.94879	0.0165344	chr1	167496660	167608713	LRCH1	leucine-rich_repeats_and_calponin_homology_(CH)_domain_containing_1	5	DOWN
ENSGALT00000025568	132.065	405.368	1.61798	0.0171149	chr3	77342282	77397523	DOPEY1	dopey_family_member_1	5	DOWN
ENSGALT00000025542	353.197	875.205	1.30915	0.0171217	chr1	103790945	103933483	TIAM1	T-cell_lymphoma_invasion_and_metastasis_1	5	DOWN
ENSGALT00000007683	45.0455	202.196	2.1663	0.0171306	chr8	7933907	7992849	FAM129A	family_with_sequence_similarity_129,_member_A	5	DOWN
ENSGALT00000042662	102.376	336.993	1.71884	0.0177866	chr26	5157230	5161261	BTG2	BTG_family,_member_2	5	DOWN
ENSGALT00000033813	14.3326	113.308	2.98287	0.0179744	chr7	4973409	4974504	CXCR7	chemokine_(C-X-C_motif)_receptor_7	5	DOWN
ENSGALT00000009084	328.627	813.667	1.30799	0.0188638	chr5	8361713	8387323	AMPD3	adenosine_monophosphate_deaminase_(isoform_E)	5	DOWN
ENSGALT00000006784	6.14256	81.0737	3.72232	0.0193073	chr5	1555414	1560214	SIGIRR	single_immunoglobulin_and_toll-interleukin_1_receptor_(TIR)_domain	5	DOWN
ENSGALT00000009271	21.499	133.82	2.63796	0.0196771	chr9	4595628	4607031	BOK	BCL2-related_ovarian_killer	5	DOWN
ENSGALT00000016296	7.16632	84.9808	3.56783	0.0198075	chr3	26632538	26715148	PLB1	phospholipase_B1	5	DOWN
ENSGALT00000025628	52.2118	214.894	2.04118	0.0199484	chr3	80071279	80164378	FILIP1	filamin_A_interacting_protein_1	5	DOWN
ENSGALT00000001087	107.495	341.877	1.66921	0.0202172	-	-	-	TJP3	Tight_junction_protein_3_(zona_occludens_3)	5	DOWN
ENSGALT00000031625	239.56	620.262	1.37249	0.0208162	chr3	90579227	90585822	CLN8	ceroid-lipofuscinosis,_neuronal_8_(epilepsy,_progressive_with_mental_retardation)	5	DOWN
ENSGALT00000039687	31.7366	161.171	2.34437	0.0208229	chr15	3411517	3413275	FZD10	frizzled_homolog_10_(Drosophila)	5	DOWN
ENSGALT00000016467	32.7603	163.124	2.31595	0.0213919	chr4	33528137	33541938	CSGALNACT1	Chondroitin_sulfate_N-acetylgalactosaminyltransferase_1	5	DOWN
ENSGALT00000027534	45.0455	194.381	2.10944	0.0216144	chr1	170636417	170751330	FREM2	FRAS1_related_extracellular_matrix_protein_2	5	DOWN
ENSGALT00000044681	6.14256	79.1201	3.68713	0.0216735	chrZ	7993513	8162224	CNTFR	Ciliary_neurotrophic_factor_receptor_subunit_alpha_[Source:UniProtKB/Swiss-Prot;Acc:P51641]	5	DOWN
ENSGALT00000012478	226.251	589.005	1.38036	0.0217671	chr9	14744528	14748605	B3GNT7	UDP-GlcNAc:betaGal_beta-1,3-N-acetylglucosaminyltransferase_7	5	DOWN
ENSGALT00000022784	216.013	567.516	1.39354	0.0218551	chr1	67808168	68044295	ITPR2	inositol_1,4,5-triphosphate_receptor,_type_2	5	DOWN
ENSGALT00000020446	15.3564	112.331	2.87084	0.0219224	chr2	55844914	55876030	SLC9A3	solute_carrier_family_9_(sodium/hydrogen_exchanger),_member_3	5	DOWN
ENSGALT00000018718	311.223	761.897	1.29165	0.0220057	chr2	40901332	40926503	GPD1L	glycerol-3-phosphate_dehydrogenase_1-like	5	DOWN
ENSGALT00000026815	262.083	661.288	1.33526	0.0221084	chr1	124420460	124541119	SHROOM2	shroom_family_member_2	5	DOWN
ENSGALT00000038225	23.5465	136.751	2.53796	0.0221854	chr15	9992496	10000294	INPP5J	inositol_polyphosphate-5-phosphatase_J_[Source:HGNC_Symbol;Acc:8956]	5	DOWN
ENSGALT00000030043	109.542	339.923	1.63372	0.0228669	chr1	74509652	74533385	CD9	CD9_molecule	5	DOWN
ENSGALT00000021134	350.126	834.18	1.25248	0.0233365	chr1	59846667	59987218	TMTC1	transmembrane_and_tetratricopeptide_repeat_containing_1	5	DOWN
ENSGALT00000004590	29.6891	152.379	2.35966	0.0233491	chr3	56638963	56641934	CTGF	connective_tissue_growth_factor	5	DOWN
ENSGALT00000015558	157.659	440.533	1.48244	0.0236139	chr1	29596114	29655026	PRICKLE1	prickle_homolog_1_(Drosophila)	5	DOWN
ENSGALT00000013116	4.09504	68.3754	4.06153	0.023701	chr1	14213410	14241547	PIK3CG	phosphoinositide-3-kinase,_catalytic,_gamma_polypeptide	5	DOWN
ENSGALT00000009649	413.599	958.232	1.21214	0.0239181	chr5	9768004	9802730	RRAS2	related_RAS_viral_(r-ras)_oncogene_homolog_2	5	DOWN
ENSGALT00000044456	21.499	128.936	2.58432	0.0239263	-	-	-	FAIM2	Fas_apoptotic_inhibitory_molecule_2	5	DOWN
ENSGALT00000044854	17.4039	116.238	2.7396	0.0244713	chr20	5314291	5324952	EMILIN3	elastin_microfibril_interfacer_3	5	DOWN
ENSGALT00000014372	233.417	593.889	1.34728	0.0244867	chr17	1479415	1489213	SLC31A1	Solute_carrier_family_31_(copper_transporters),_member_1	5	DOWN
ENSGALT00000003011	62.4494	231.499	1.89025	0.0245361	chr1	107392916	107418544	SH3BGR	SH3_domain_binding_glutamic_acid-rich_protein	5	DOWN
ENSGALT00000009844	48.1167	197.312	2.03587	0.0247276	chr11	17837658	17843641	ZFPM1	zinc_finger_protein,_multitype_1	5	DOWN
ENSGALT00000003767	1.02376	49.8163	5.60467	0.0249026	chr23	4239917	4255560	TFAP2E	transcription_factor_AP-2_epsilon_(activating_enhancer_binding_protein_2_epsilon)	5	DOWN
ENSGALT00000026373	45.0455	189.497	2.07272	0.0249772	chr3	90462606	90561538	ARHGEF10	Rho_guanine_nucleotide_exchange_factor_(GEF)_10	5	DOWN
ENSGALT00000045072	42.9979	183.637	2.09452	0.0256122	chr7	34342480	34374375	LYPD6B	LY6/PLAUR_domain_containing_6B	5	DOWN
ENSGALT00000006617	142.303	402.438	1.4998	0.0259509	chr18	8080241	8086435	SLC16A6	solute_carrier_family_16,_member_6_(monocarboxylic_acid_transporter_7)	5	DOWN
ENSGALT00000039184	74.7345	256.896	1.78134	0.026123	chr5	13433999	13472383	LSP1	lymphocyte-specific_protein_1	5	DOWN
ENSGALT00000026131	68.592	242.244	1.82035	0.0266403	chr2	141665330	141689879	ST3GAL1	ST3_beta-galactoside_alpha-2,3-sialyltransferase_1	5	DOWN
ENSGALT00000024497	72.687	251.035	1.78812	0.0269119	chr2	106104444	106201400	GAREM	GRB2_associated,_regulator_of_MAPK1_[Source:HGNC_Symbol;Acc:26136]	5	DOWN
ENSGALT00000018797	1.02376	48.8395	5.5761	0.0269752	chr2	41769834	41786365	ENTPD3	ectonucleoside_triphosphate_diphosphohydrolase_3	5	DOWN
ENSGALT00000014051	58.3543	217.824	1.90025	0.0273403	chr17	1798820	1801316	TOR4A	Uncharacterized_protein_[Source:UniProtKB/TrEMBL;Acc:F1NLT2]	5	DOWN
ENSGALT00000043022	7.16632	79.1201	3.46474	0.0276124	chr1	23012647	23023872	WNT16	wingless-type_MMTV_integration_site_family,_member_16	5	DOWN
ENSGALT00000010632	105.447	320.387	1.6033	0.0280766	chr5	13433999	13472383	LSP1	lymphocyte-specific_protein_1	5	DOWN
ENSGALT00000020823	12.2851	96.7023	2.97664	0.0285292	chr1	55643575	55658917	DRAM1	DNA-damage_regulated_autophagy_modulator_1	5	DOWN
ENSGALT00000044870	53.2355	204.149	1.93916	0.0286884	chr25	577826	603090	MEF2D	myocyte_enhancer_factor_2D-like_[Source:RefSeq_peptide;Acc:NP_001026771]	5	DOWN
ENSGALT00000006807	72.687	247.128	1.76549	0.029497	chr23	5708085	5715390	RCAN3	RCAN_family_member_3	5	DOWN
ENSGALT00000000633	265.154	640.775	1.27299	0.0295834	chr22	1277203	1295625	RHOBTB2	Rho-related_BTB_domain_containing_2	5	DOWN
ENSGALT00000017475	48.1167	190.474	1.98499	0.0300709	chr5	43694394	43711430	TC2N	tandem_C2_domains,_nuclear	5	DOWN
ENSGALT00000043084	3.07128	59.5843	4.27802	0.0303548	chr17	415521	418106	CLIC3	chloride_intracellular_channel_3_[Source:HGNC_Symbol;Acc:2064]	5	DOWN
ENSGALT00000011227	2.04752	53.7235	4.7136	0.0309806	chr20	10922029	10944646	SLC12A5	solute_carrier_family_12_(potassium/chloride_transporter),_member_5_[Source:HGNC_Symbol;Acc:13818]	5	DOWN
ENSGALT00000045730	2.04752	53.7235	4.7136	0.0309806	chr2	56297532	56302379	-	-	5	DOWN
ENSGALT00000020177	41.9742	174.846	2.05851	0.0309843	chr2	52094037	52119044	STK17A	serine/threonine_kinase_17a	5	DOWN
ENSGALT00000004437	10.2376	87.9112	3.10217	0.0313933	chr27	5126611	5140086	RND2	Rho_family_GTPase_2	5	DOWN
ENSGALT00000020836	61.4256	218.801	1.83271	0.0319261	chr2	63302983	63336417	MAK	male_germ_cell-associated_kinase	5	DOWN
ENSGALT00000011863	117.732	337.97	1.52138	0.0326864	chr2	14597994	14657468	SVIL	supervillin	5	DOWN
ENSGALT00000004117	95.2097	290.107	1.6074	0.0332931	chr26	4050272	4061671	DEF6	differentially_expressed_in_FDCP_6_homolog_(mouse)	5	DOWN
ENSGALT00000018472	2.04752	52.7467	4.68713	0.0333099	chr1	45037003	45076411	TMCC3	transmembrane_and_coiled-coil_domain_family_3	5	DOWN
ENSGALT00000044719	55.2831	203.173	1.8778	0.0334391	chr1	54174608	54204367	-	-	5	DOWN
ENSGALT00000019332	273.344	644.682	1.23787	0.0336819	chr2	43441954	43464891	LIMD1	LIM_domains_containing_1	5	DOWN
ENSGALT00000015423	159.707	420.997	1.39839	0.0338561	chr4	21509901	21683609	RAPGEF2	Rap_guanine_nucleotide_exchange_factor_(GEF)_2	5	DOWN
ENSGALT00000045568	246.726	591.935	1.26253	0.0340609	chr4	56788243	56808532	AP1AR	Uncharacterized_protein_[Source:UniProtKB/TrEMBL;Acc:F1NFB7]	5	DOWN
ENSGALT00000010943	190.419	481.558	1.33853	0.0340808	chr24	4206158	4214569	MCAM	melanoma_cell_adhesion_molecule	5	DOWN
ENSGALT00000028007	6.14256	71.3057	3.53711	0.0343294	chr1	194098030	194256622	GDPD5	glycerophosphodiester_phosphodiesterase_domain_containing_5	5	DOWN
ENSGALT00000021741	124.899	349.691	1.48532	0.0344534	chr5	3278737	3399446	ANO3	anoctamin-3_isoform_1_[Source:RefSeq_peptide;Acc:NP_001186394]	5	DOWN
ENSGALT00000023973	10.2376	85.9576	3.06975	0.0346651	chrZ	13287240	13417571	GHR	growth_hormone_receptor	5	DOWN
ENSGALT00000045691	23.5465	125.029	2.40868	0.0348091	chr10	18171487	18201886	SMAD6	SMAD_family_member_6	5	DOWN
ENSGALT00000001905	15.3564	101.586	2.72579	0.0354637	chr13	7763329	7774372	ARHGEF37	Rho_guanine_nucleotide_exchange_factor_(GEF)_37	5	DOWN
ENSGALT00000021117	196.562	490.349	1.31882	0.0356097	chr1	59721892	59753853	CAPRIN2	caprin_family_member_2	5	DOWN
ENSGALT00000043126	125.923	349.691	1.47354	0.0357208	chr5	3278138	3399446	ANO3	anoctamin-3_isoform_1_[Source:RefSeq_peptide;Acc:NP_001186394]	5	DOWN
ENSGALT00000019750	183.253	462.999	1.33717	0.036208	chr7	27789277	27816492	ESYT3	extended_synaptotagmin-like_protein_3_[Source:HGNC_Symbol;Acc:24295]	5	DOWN
ENSGALT00000002596	145.374	387.786	1.41549	0.0363322	chr20	1306943	1341199	-	-	5	DOWN
ENSGALT00000044223	106.471	308.666	1.53558	0.0366169	chr6	22901372	22923088	WBP1L	WW_domain_binding_protein_1-like_[Source:HGNC_Symbol;Acc:23510]	5	DOWN
ENSGALT00000026575	33.7841	149.449	2.14524	0.0369281	chr3	100224718	100231095	NT5C1B	5'-nucleotidase,_cytosolic_IB	5	DOWN
ENSGALT00000039200	49.1405	184.613	1.90952	0.0379492	chr1	18948098	18951794	PIM3	pim-3_oncogene_[Source:HGNC_Symbol;Acc:19310]	5	DOWN
ENSGALT00000022794	5.1188	65.445	3.6764	0.0380643	chr1	189475609	189529781	SYTL2	synaptotagmin-like_2	5	DOWN
ENSGALT00000029931	283.582	652.496	1.20221	0.0381199	chr1	193589381	193595818	TRIM3	tripartite_motif-containing_3	5	DOWN
ENSGALT00000015428	225.227	540.165	1.26202	0.0383407	chr2	22843080	22962940	CDK6	cyclin-dependent_kinase_6	5	DOWN
ENSGALT00000018836	171.992	436.626	1.34406	0.0384566	chr5	50397015	50449044	PPP1R13B	protein_phosphatase_1,_regulatory_(inhibitor)_subunit_13B	5	DOWN
ENSGALT00000011176	15.3564	99.6327	2.69778	0.038676	chr18	9570844	9578677	AATK	apoptosis-associated_tyrosine_kinase_[Source:HGNC_Symbol;Acc:21]	5	DOWN
ENSGALT00000021228	134.113	360.436	1.4263	0.0393481	chr1	61044204	61059847	WNT5B	wingless-type_MMTV_integration_site_family,_member_5B	5	DOWN
ENSGALT00000007042	166.873	424.904	1.34839	0.0394165	chr14	3522006	3875659	SDK1	sidekick_1	5	DOWN
ENSGALT00000025890	242.631	570.446	1.23332	0.0397618	chr2	129152685	129181081	FZD6	frizzled_homolog_6_(Drosophila)	5	DOWN
ENSGALT00000027154	246.726	577.283	1.22637	0.0402053	chr1	136509159	136547639	GAS6	growth_arrest-specific_6	5	DOWN
ENSGALT00000009397	57.3306	200.242	1.80437	0.0407379	chrZ	8187057	8211693	IL11RA	interleukin_11_receptor,_alpha	5	DOWN
ENSGALT00000001106	176.087	439.556	1.31976	0.0413099	chr1	192620178	192621237	TSKU	tsukushin	5	DOWN
ENSGALT00000040822	154.588	396.577	1.35917	0.0420507	chr24	4206195	4213891	MCAM	melanoma_cell_adhesion_molecule	5	DOWN
ENSGALT00000003737	3.07128	54.7003	4.15464	0.042462	chrZ	8842283	8859327	RUSC2	RUN_and_SH3_domain_containing_2	5	DOWN
ENSGALT00000034276	76.782	239.314	1.64006	0.0432023	chr14	1990040	2011428	PDGF-A	platelet-derived_growth_factor_subunit_A_preproprotein_[Source:RefSeq_peptide;Acc:NP_989637]	5	DOWN
ENSGALT00000044829	41.9742	163.124	1.9584	0.0440914	chrZ	37186554	37195651	-	-	5	DOWN
ENSGALT00000027391	139.231	362.389	1.38006	0.0449616	chr1	165058990	165145844	ELF1	E74-like_factor_1_(ets_domain_transcription_factor)	5	DOWN
ENSGALT00000005557	3.07128	53.7235	4.12864	0.0453999	chr18	6825945	6842734	-	-	5	DOWN
ENSGALT00000008687	17.4039	101.586	2.54522	0.0457066	chr12	7892862	7904972	WNT5A	wingless-type_MMTV_integration_site_family,_member_5A	5	DOWN
ENSGALT00000034804	194.514	466.906	1.26325	0.046035	chr19	7188292	7195778	SKA2	spindle_and_kinetochore_associated_complex_subunit_2	5	DOWN
ENSGALT00000026914	23.5465	117.215	2.31557	0.0468277	chr3	107230219	107461810	PKHD1	Polycystic_kidney_and_hepatic_disease_1_(autosomal_recessive)	5	DOWN
NM_204306	67.9961	226.16	1.73382	0.0470612	chr14	1990488	2011574	PDGFA	platelet-derived_growth_factor_alpha_polypeptide	5	DOWN
ENSGALT00000021234	93.1622	265.687	1.51191	0.0501559	chr2	78115687	78159642	DAP	death-associated_protein	5	DOWN
ENSGALT00000009188	47.093	169.962	1.85163	0.0504051	chr13	12682532	12711218	FLT4	fms-related_tyrosine_kinase_4	5	DOWN
ENSGALT00000007713	4.09504	56.6539	3.79022	0.0505507	chr5	642268	659083	PAK6	p21(CDKN1A)-activated_kinase_6	5	DOWN
ENSGALT00000043501	6.14256	64.4682	3.39168	0.0511285	chr13	9128573	9134965	MSX2	msh_homeobox_2	5	DOWN
ENSGALT00000033975	93.1622	264.71	1.5066	0.0511561	chr10	13838314	13953221	SLCO3A1	solute_carrier_organic_anion_transporter_family,_member_3A1	5	DOWN
ENSGALT00000046051	12.2851	84.004	2.77355	0.0522787	chr13	11453018	11454119	HAND1	heart_and_neural_crest_derivatives_expressed_1	5	DOWN
ENSGALT00000024233	36.8554	145.542	1.98149	0.0528658	chr3	65438149	65463769	TRAF3IP2	TRAF3_interacting_protein_2	5	DOWN
ENSGALT00000036642	104.424	285.223	1.44964	0.0528786	-	-	-	-	-	5	DOWN
ENSGALT00000019637	122.851	320.387	1.38291	0.0534167	chr1	49920223	49946710	SGSM3	small_G_protein_signaling_modulator_3	5	DOWN
ENSGALT00000018822	212.942	489.372	1.20047	0.0536637	chr7	23184121	23265694	BIN1	bridging_integrator_1	5	DOWN
ENSGALT00000045196	17.4039	97.6791	2.48864	0.0538681	chr1	24794261	24863903	MET	met_proto-oncogene_(hepatocyte_growth_factor_receptor)	5	DOWN
ENSGALT00000004073	16.3802	94.7487	2.53216	0.0542598	chr7	748935	874858	GULP1	GULP,_engulfment_adaptor_PTB_domain_containing_1	5	DOWN
ENSGALT00000037802	2.04752	45.9092	4.48683	0.0552352	chr2	34302633	34303705	-	-	5	DOWN
ENSGALT00000033528	38.9029	148.472	1.93224	0.0556888	chr6	16089577	16107758	-	-	5	DOWN
ENSGALT00000045703	15.3564	90.8416	2.56451	0.0569442	chr19	721143	722360	CLDN4	claudin_4_[Source:HGNC_Symbol;Acc:2046]	5	DOWN
ENSGALT00000001009	59.3781	191.451	1.68897	0.0570794	chr11	18936950	19031832	ZFHX3	zinc_finger_homeobox_3	5	DOWN
ENSGALT00000027673	68.592	210.01	1.61435	0.0575397	chr1	177897784	177940298	LATS2	LATS,_large_tumor_suppressor,_homolog_2_(Drosophila)	5	DOWN
ENSGALT00000044091	140.255	347.738	1.30994	0.0587234	chr8	12546366	12596250	ARHGAP29	Rho_GTPase_activating_protein_29	5	DOWN
ENSGALT00000042794	30.7128	127.96	2.05878	0.0592564	chr12	1440104	1546831	CACNA2D2	calcium_channel,_voltage-dependent,_alpha_2/delta_subunit_2	5	DOWN
ENSGALT00000023483	24.5703	113.308	2.20526	0.0595438	chr25	579692	603051	MEF2D	myocyte_enhancer_factor_2D-like_[Source:RefSeq_peptide;Acc:NP_001026771]	5	DOWN
ENSGALT00000003399	170.968	403.415	1.23854	0.0600037	chr9	1740425	1751264	PLEKHB2	pleckstrin_homology_domain_containing,_family_B_(evectins)_member_2	5	DOWN
ENSGALT00000014558	23.5465	110.377	2.22886	0.0605295	chr17	902673	915909	NOXA1	NADPH_oxidase_activator_1	5	DOWN
ENSGALT00000005519	62.4494	195.358	1.64536	0.0606048	chr5	181926	188067	-	-	5	DOWN
ENSGALT00000026078	72.687	215.871	1.5704	0.0608029	chr1	108800899	108832149	SLC37A1	solute_carrier_family_37_(glycerol-3-phosphate_transporter),_member_1	5	DOWN
ENSGALT00000005611	30.7128	126.006	2.03658	0.0632777	chr14	1146803	1181494	BAIAP2L1	BAI1-associated_protein_2-like_1	5	DOWN
ENSGALT00000043042	44.0217	155.31	1.81886	0.0633372	chr7	21638776	21666114	SPEG	SPEG_complex_locus	5	DOWN
ENSGALT00000019112	2.04752	43.9556	4.4241	0.0637773	chr5	51829754	51839632	C14ORF79	C14ORF79	5	DOWN
ENSGALT00000046028	76.782	221.732	1.52997	0.0639649	chr1	59543234	59551697	METTL20	Uncharacterized_protein_[Source:UniProtKB/TrEMBL;Acc:E1C237]	5	DOWN
ENSGALT00000005219	6.14256	60.561	3.30148	0.0640611	chrZ	10001893	10166119	ADAMTS12	ADAM_metallopeptidase_with_thrombospondin_type_1_motif,_12	5	DOWN
ENSGALT00000016464	1.02376	38.0948	5.21765	0.064942	chr4	33513177	33525476	SH2D4A	SH2_domain_containing_4A	5	DOWN
ENSGALT00000017667	9.21384	70.329	2.93224	0.0649751	chr2	30032053	30066287	MACC1	metastasis_associated_in_colon_cancer_1	5	DOWN
ENSGALT00000045768	62.4494	192.428	1.62356	0.065121	chr25	719868	722103	S100A16	S100_calcium_binding_protein_A16_[Source:HGNC_Symbol;Acc:20441]	5	DOWN
ENSGALT00000002105	34.8079	133.82	1.94281	0.0662191	chr13	7596137	7665243	HTR4	5-hydroxytryptamine_(serotonin)_receptor_4	5	DOWN
ENSGALT00000002539	42.9979	151.403	1.81605	0.0665747	chr13	7040656	7094574	ATP10B	ATPase,_class_V,_type_10B	5	DOWN
ENSGALT00000039962	15.3564	86.9344	2.50109	0.0674949	chr7	3031381	3433912	ERBB4	v-erb-a_erythroblastic_leukemia_viral_oncogene_homolog_4	5	DOWN
ENSGALT00000040421	81.9008	228.569	1.48068	0.0684884	chr20	1993534	2109517	RALY	RNA_binding_protein,_autoantigenic_(hnRNP-associated_with_lethal_yellow_homolog_(mouse))	5	DOWN
ENSGALT00000004577	84.9721	234.43	1.46409	0.068579	chr15	4444355	4481664	AACS	acetoacetyl-CoA_synthetase	5	DOWN
ENSGALT00000003894	98.281	259.826	1.40256	0.0685889	chr11	1695688	1703743	MTSS1L	Uncharacterized_protein_[Source:UniProtKB/TrEMBL;Acc:E1C750]	5	DOWN
ENSGALT00000027212	139.231	336.016	1.27105	0.0686682	chr1	138452044	138502550	CARKD	Uncharacterized_protein_[Source:UniProtKB/TrEMBL;Acc:F1P2P4]	5	DOWN
ENSGALT00000007626	17.4039	91.8184	2.39937	0.0687743	chr6	11551269	11555665	AIFM2	apoptosis-inducing_factor,_mitochondrion-associated,_2	5	DOWN
ENSGALT00000024432	5.1188	55.6771	3.44321	0.0688678	chrZ	35536009	35564814	GDA	guanine_deaminase	5	DOWN
ENSGALT00000004171	67.5682	200.242	1.56733	0.0689874	chr15	3327007	3343689	PIWIL1	piwi-like_1_(Drosophila)	5	DOWN
ENSGALT00000004111	4.09504	51.7699	3.66016	0.0690415	chr14	13064936	13068959	-	-	5	DOWN
ENSGALT00000012820	62.4494	189.497	1.60142	0.0699559	chr5	18566513	18666428	LDLRAD3	low_density_lipoprotein_receptor_class_A_domain_containing_3	5	DOWN
ENSGALT00000044280	37.8791	138.704	1.87254	0.0700997	chr2	5229743	5238803	CSRNP1	Uncharacterized_protein_[Source:UniProtKB/TrEMBL;Acc:E1C673]	5	DOWN
ENSGALT00000013262	131.041	319.411	1.28539	0.0704228	chr6	22937885	23025465	CNNM2	cyclin_M2	5	DOWN
ENSGALT00000006108	70.6395	205.126	1.53796	0.0708677	chr27	4541982	4546408	KRT15	keratin_15	5	DOWN
ENSGALT00000014634	6.14256	58.6075	3.25417	0.0716589	chr2	20889644	20894978	STEAP4	STEAP_family_member_4	5	DOWN
ENSGALT00000031548	2.04752	42.002	4.35851	0.0736114	chr3	106954747	106976693	GATA4	GATA_binding_protein_4	5	DOWN
ENSGALT00000019393	55.2831	172.892	1.64496	0.0740357	chr2	43720851	43736462	ZDHHC3	Zinc_finger,_DHHC-type_containing_3	5	DOWN
ENSGALT00000009113	124.899	303.782	1.28228	0.0757483	chr8	12544480	12594090	ARHGAP29	Rho_GTPase_activating_protein_29	5	DOWN
ENSGALT00000018337	26.6178	111.354	2.06469	0.0759386	chr7	21558494	21570704	OBSL1	obscurin-like_1	5	DOWN
ENSGALT00000037447	47.093	155.31	1.72156	0.0759547	chr3	56146528	56178513	STX7	syntaxin_7	5	DOWN
ENSGALT00000009017	17.4039	88.888	2.35258	0.0776275	chr8	12479131	12484507	F3	coagulation_factor_III_(thromboplastin,_tissue_factor)	5	DOWN
ENSGALT00000010650	28.6653	115.261	2.00753	0.0778339	chr2	9791127	9894465	ZMYND11	zinc_finger,_MYND_domain_containing_11	5	DOWN
ENSGALT00000002894	28.6653	115.261	2.00753	0.0778339	chrZ	68538793	68553327	C9ORF72	C9ORF72	5	DOWN
ENSGALT00000040829	29.6891	117.215	1.98115	0.0786904	chr24	4173243	4185291	USP2	ubiquitin_specific_peptidase_2	5	DOWN
ENSGALT00000009327	12.2851	75.2129	2.61407	0.0788786	chr15	7808410	7819197	KREMEN1	kringle_containing_transmembrane_protein_1	5	DOWN
ENSGALT00000005385	24.5703	105.493	2.10217	0.0791925	chr26	4960036	4974337	TFEB	transcription_factor_EB	5	DOWN
ENSGALT00000024216	22.5227	99.6327	2.14524	0.0825474	chr4	78460391	78464160	CYTL1	cytokine-like_1	5	DOWN
ENSGALT00000010134	18.4277	89.8648	2.28588	0.0826719	chr14	6965317	6975475	SCNN1G	sodium_channel,_nonvoltage-gated_1,_gamma	5	DOWN
ENSGALT00000021712	98.281	250.058	1.34728	0.0827982	chr5	3526416	3559728	BBOX1	butyrobetaine_(gamma),_2-oxoglutarate_dioxygenase_(gamma-butyrobetaine_hydroxylase)_1	5	DOWN
ENSGALT00000017699	93.1622	240.291	1.36696	0.0833231	chr8	25544037	25566897	HOOK1	hook_homolog_1_(Drosophila)	5	DOWN
ENSGALT00000025807	112.614	275.455	1.29044	0.0840021	chr1	105365174	105370830	CLIC6	chloride_intracellular_channel_6	5	DOWN
ENSGALT00000016526	21.499	96.7023	2.16928	0.0842536	chr1	36192579	36280194	LGR5	leucine-rich_repeat-containing_G_protein-coupled_receptor_5	5	DOWN
ENSGALT00000037175	111.59	272.525	1.28818	0.0856277	chr2	68065224	68124817	PHLPP1	Uncharacterized_protein_[Source:UniProtKB/TrEMBL;Acc:F1NJB8]	5	DOWN
ENSGALT00000038626	62.4494	179.73	1.52507	0.0886426	chr15	7139417	7142644	ASPHD2	aspartate_beta-hydroxylase_domain_containing_2	5	DOWN
ENSGALT00000045711	1.02376	34.1877	5.06153	0.0892725	chr9	22180189	22186891	PTX3	pentraxin-related_gene,_rapidly_induced_by_IL-1_beta	5	DOWN
ENSGALT00000044788	112.614	271.548	1.26982	0.0900321	chr17	6079261	6091444	AIF1L	Uncharacterized_protein_[Source:UniProtKB/TrEMBL;Acc:F1NDU3]	5	DOWN
ENSGALT00000022502	100.329	249.082	1.31189	0.0905675	chr2	148565718	148571435	FAM83H	family_with_sequence_similarity_83,_member_H	5	DOWN
ENSGALT00000027392	115.685	276.432	1.25672	0.0910094	chr1	165060057	165098344	ELF1	E74-like_factor_1_(ets_domain_transcription_factor)	5	DOWN
ENSGALT00000012995	30.7128	114.285	1.89572	0.0933963	chr20	13824099	13879197	FAM65C	family_with_sequence_similarity_65,_member_C_[Source:HGNC_Symbol;Acc:16168]	5	DOWN
ENSGALT00000021346	93.1622	234.43	1.33134	0.0934993	chr1	62590065	62598178	AKR	aldo-keto_reductase_family_1_member_B10_[Source:RefSeq_peptide;Acc:NP_989960]	5	DOWN
ENSGALT00000011312	115.685	274.478	1.24649	0.0941585	chr14	8636415	8660489	EEF2K	eukaryotic_elongation_factor-2_kinase	5	DOWN
ENSGALT00000018780	98.281	243.221	1.30728	0.0943512	chr2	41602629	41626749	SNRK	SNF_related_kinase	5	DOWN
ENSGALT00000012131	6.14256	53.7235	3.12864	0.0946249	chr9	14463389	14478700	MUC4	mucin_4,_cell_surface_associated	5	DOWN
ENSGALT00000021718	51.188	155.31	1.60127	0.0947532	chr5	377153	386630	SYT7	synaptotagmin_VII	5	DOWN
ENSGALT00000014106	28.6653	109.401	1.93224	0.0949638	chr8	15135793	15137430	CYR61	cysteine-rich,_angiogenic_inducer,_61	5	DOWN
ENSGALT00000025738	120.804	282.293	1.22453	0.0962025	chr1	104683736	104692198	IFNGR2	interferon_gamma_receptor_2_(interferon_gamma_transducer_1)	5	DOWN
ENSGALT00000040212	9.21384	62.5146	2.76232	0.0965844	chr21	2676647	2677571	RNF223	ring_finger_protein_223_[Source:HGNC_Symbol;Acc:40020]	5	DOWN
ENSGALT00000005755	27.6415	106.47	1.94554	0.0973292	chr5	254168	276875	MYRF	myelin_regulatory_factor_[Source:HGNC_Symbol;Acc:1181]	5	DOWN
ENSGALT00000011840	2.04752	38.0948	4.21765	0.0979244	chr15	9504309	9545045	CCDC64	coiled-coil_domain_containing_64_[Source:HGNC_Symbol;Acc:28095]	5	DOWN
ENSGALT00000014682	33.7841	119.169	1.81859	0.0982324	chr3	8368922	8408079	CLIP4	CAP-GLY_domain_containing_linker_protein_family,_member_4	5	DOWN
ENSGALT00000023876	108.519	258.85	1.25417	0.0991279	chrZ	21786482	21806150	CDK7	Cyclin-dependent_kinase_7	5	DOWN
ENSGALT00000008115	14.3326	75.2129	2.39168	0.100158	chr19	7107094	7162124	PPM1E	protein_phosphatase_1E_(PP2C_domain_containing)	5	DOWN
ENSGALT00000045627	7.16632	55.6771	2.95778	0.101183	-	-	-	IL17RE	interleukin_17_receptor_E_[Source:HGNC_Symbol;Acc:18439]	5	DOWN
ENSGALT00000027850	24.5703	98.6559	2.00549	0.101274	chr1	185616758	185962787	FAT3	FAT_tumor_suppressor_homolog_3_(Drosophila)	5	DOWN
ENSGALT00000037704	8.19008	58.6075	2.83913	0.101596	chr3	40170699	40178161	DLL1	delta-like_1_(Drosophila)	5	DOWN
ENSGALT00000005928	17.4039	82.0504	2.2371	0.102662	chr15	5208506	5219304	ABCB9	ATP-binding_cassette,_sub-family_B_(MDR/TAP),_member_9	5	DOWN
ENSGALT00000026640	18.4277	84.004	2.18858	0.104488	chr1	119811747	119834097	GPR64	G_protein-coupled_receptor_64	5	DOWN
ENSGALT00000005350	29.6891	108.424	1.86868	0.105499	chr5	142306	159206	SPTB	spectrin,_beta,_erythrocytic_[Source:HGNC_Symbol;Acc:11274]	5	DOWN
ENSGALT00000036905	6.14256	51.7699	3.0752	0.105653	chr1	84665304	84703930	SENP7	SUMO1/sentrin_specific_peptidase_7	5	DOWN
ENSGALT00000008142	9.21384	60.561	2.71651	0.106518	chr12	5607157	5660512	NUP210	Nucleoporin_210kDa	5	DOWN
ENSGALT00000026687	113.637	263.734	1.21464	0.106622	chr1	120080415	120151665	SCML2	sex_comb_on_midleg-like_2_(Drosophila)	5	DOWN
ENSGALT00000000873	8.19008	57.6307	2.81489	0.106875	chr26	309758	314195	ELF3	E74-like_factor_3_(ets_domain_transcription_factor,_epithelial-specific_)	5	DOWN
ENSGALT00000024332	45.0455	138.704	1.62256	0.10741	chrZ	33515738	33587379	DENND4C	DENN/MADD_domain_containing_4C	5	DOWN
ENSGALT00000017992	97.2572	234.43	1.26928	0.1077	chr4	45164031	45214295	AFF1	AF4/FMR2_family,_member_1	5	DOWN
ENSGALT00000011466	114.661	264.71	1.20704	0.108128	chr5	15964388	15997992	CPT1A	carnitine_palmitoyltransferase_1A_(liver)	5	DOWN
ENSGALT00000005651	28.6653	105.493	1.87978	0.108287	chr20	4109315	4154694	PPP1R16B	protein_phosphatase_1,_regulatory_(inhibitor)_subunit_16B	5	DOWN
NM_204629	93.7522	232.954	1.31312	0.110232	chr1	62590036	62598178	AKR1B10	aldo-keto_reductase_family_1,_member_B10_(aldose_reductase)	5	DOWN
ENSGALT00000021448	111.59	257.873	1.20845	0.110994	chr2	84221676	84295762	TMEM245	transmembrane_protein_245_[Source:HGNC_Symbol;Acc:1363]	5	DOWN
ENSGALT00000000819	6.14256	50.7931	3.04772	0.111614	chr26	1676674	1717188	PLEKHA6	pleckstrin_homology_domain_containing,_family_A_member_6	5	DOWN
ENSGALT00000016460	36.8554	121.122	1.71651	0.112089	chr4	33473905	33509289	CDKL2	cyclin-dependent_kinase-like_2_(CDC2-related_kinase)	5	DOWN
ENSGALT00000027846	24.5703	95.7255	1.96199	0.112405	chr1	185617133	185962447	FAT3	FAT_tumor_suppressor_homolog_3_(Drosophila)	5	DOWN
ENSGALT00000026690	106.471	248.105	1.22049	0.112733	-	-	-	-	-	5	DOWN
ENSGALT00000002268	4.09504	43.9556	3.4241	0.112933	chr15	458203	470818	PPM1F	protein_phosphatase_1F_(PP2C_domain_containing)	5	DOWN
ENSGALT00000043645	4.09504	43.9556	3.4241	0.112933	chrZ	52715879	52804502	TRABD2A	TraB_domain_containing_2A_[Source:HGNC_Symbol;Acc:27013]	5	DOWN
ENSGALT00000027547	1.02376	31.2573	4.93224	0.11323	chr1	171675465	171701278	SMAD9	SMAD_family_member_9	5	DOWN
ENSGALT00000023931	1.02376	31.2573	4.93224	0.11323	chrZ	12698105	12708972	EP4	prostaglandin_E2_receptor_EP4_subtype_[Source:RefSeq_peptide;Acc:NP_001074972]	5	DOWN
ENSGALT00000007645	33.7841	114.285	1.75821	0.114476	chr21	6300380	6312118	WNT4	wingless-type_MMTV_integration_site_family,_member_4	5	DOWN
ENSGALT00000002936	3.07128	40.0484	3.70483	0.114496	-	-	-	MISP	mitotic_spindle_positioning_[Source:HGNC_Symbol;Acc:27000]	5	DOWN
ENSGALT00000015094	11.2614	64.4682	2.51721	0.114659	chr4	19890127	19899793	RBM46	RNA_binding_motif_protein_46	5	DOWN
ENSGALT00000011008	50.1643	145.542	1.5367	0.116316	chr9	11035308	11044835	PLSCR4	Uncharacterized_protein_[Source:UniProtKB/TrEMBL;Acc:F1NX66]	5	DOWN
ENSGALT00000028420	31.7366	109.401	1.7854	0.117212	chr23	4910835	4916448	TINAGL1	tubulointerstitial_nephritis_antigen-like_1	5	DOWN
ENSGALT00000022788	38.9029	123.076	1.6616	0.119235	chr13	8764211	8797603	CPEB4	cytoplasmic_polyadenylation_element_binding_protein_4	5	DOWN
ENSGALT00000037684	73.7108	187.544	1.34728	0.11941	chr1	53843799	53857446	TCP11L2	t-complex_11_(mouse)-like_2	5	DOWN
ENSGALT00000027929	87.0196	210.01	1.27105	0.122041	chr1	74562444	74577343	ARHGEF5	Rho_guanine_nucleotide_exchange_factor_(GEF)_5_[Source:HGNC_Symbol;Acc:13209]	5	DOWN
ENSGALT00000038916	3.07128	39.0716	3.66921	0.122187	chr2	4944067	4965594	XIRP1	xin_actin-binding_repeat_containing_1	5	DOWN
ENSGALT00000015350	92.1384	218.801	1.24775	0.122358	chr5	27163765	27173152	KIAA0247	KIAA0247	5	DOWN
ENSGALT00000023830	49.1405	141.635	1.52719	0.122541	chr2	100033708	100101435	EPB41L3	erythrocyte_membrane_protein_band_4.1-like_3	5	DOWN
ENSGALT00000018839	37.8791	120.145	1.6653	0.122559	chr2	42031975	42073412	SH3BP5	SH3-domain_binding_protein_5_(BTK-associated)	5	DOWN
ENSGALT00000011423	6.14256	48.8395	2.99114	0.124507	chr12	11788844	11807134	PXK	PX_domain_containing_serine/threonine_kinase	5	DOWN
ENSGALT00000045333	23.5465	89.8648	1.93224	0.128159	chr20	11959015	11971950	RBM38	RNA_binding_motif_protein_38	5	DOWN
ENSGALT00000027525	15.3564	71.3057	2.21518	0.131271	chr1	170265928	170402754	LHFP	lipoma_HMGIC_fusion_partner	5	DOWN
ENSGALT00000003220	15.3564	71.3057	2.21518	0.131271	chrZ	8457023	8462408	FAM214B	family_with_sequence_similarity_214,_member_B_[Source:HGNC_Symbol;Acc:25666]	5	DOWN
ENSGALT00000040826	28.6653	99.6327	1.79731	0.131576	chr24	4176611	4184533	USP2	ubiquitin_specific_peptidase_2	5	DOWN
ENSGALT00000040552	13.3089	66.4218	2.31927	0.131863	chr5	2932	21284	-	-	5	DOWN
ENSGALT00000026310	1.02376	29.3037	4.83913	0.132598	chr3	87554345	87560990	KLHL31	kelch-like_31_(Drosophila)	5	DOWN
ENSGALT00000011310	41.9742	125.029	1.57469	0.133483	chr10	14461078	14573856	MCTP2	multiple_C2_domains,_transmembrane_2	5	DOWN
ENSGALT00000043046	77.8058	189.497	1.28423	0.13364	chr2	28529556	28536991	SOSTDC1	sclerostin_domain_containing_1	5	DOWN
ENSGALT00000018208	20.4752	82.0504	2.00263	0.134369	chr1	42677858	42684720	C12ORF29	C12ORF29	5	DOWN
ENSGALT00000025959	18.4277	77.1665	2.0661	0.13673	chr2	136064123	136069743	NOV	nephroblastoma_overexpressed_gene	5	DOWN
ENSGALT00000020069	78.8296	189.497	1.26537	0.13869	chr1	50836438	50854357	PLA2G6	phospholipase_A2,_group_VI_(cytosolic,_calcium-independent)	5	DOWN
ENSGALT00000043823	3.07128	37.1181	3.59521	0.139076	-	-	-	MISP	mitotic_spindle_positioning_[Source:HGNC_Symbol;Acc:27000]	5	DOWN
ENSGALT00000045144	2.04752	33.2109	4.01971	0.139441	chr25	404203	413641	PEAR1	platelet_endothelial_aggregation_receptor_1_[Source:HGNC_Symbol;Acc:33631]	5	DOWN
ENSGALT00000018503	80.8771	192.428	1.25051	0.14041	chr4	48581285	48595158	IGFBP7	insulin-like_growth_factor_binding_protein_7	5	DOWN
ENSGALT00000017230	21.499	83.0272	1.94932	0.140468	chr5	41460689	41463889	FLRT2	fibronectin_leucine_rich_transmembrane_protein_2	5	DOWN
ENSGALT00000001027	68.592	170.938	1.31737	0.141023	chr26	2250626	2261807	PM20D1	peptidase_M20_domain_containing_1	5	DOWN
ENSGALT00000031549	8.19008	51.7699	2.66016	0.144382	chr2	102302370	102315684	GATA6	GATA_binding_protein_6	5	DOWN
ENSGALT00000025316	7.16632	48.8395	2.76874	0.145831	chr4	82570316	82594476	NAT8L	N-acetyltransferase_8-like	5	DOWN
ENSGALT00000019893	12.2851	61.5378	2.32456	0.147032	chr1	50627426	50649375	NPTXR	Neuronal_pentraxin_receptor	5	DOWN
ENSGALT00000016952	2.04752	32.2341	3.97664	0.149575	chr9	23264510	23304671	WWTR1	WW_domain_containing_transcription_regulator_1_[Source:HGNC_Symbol;Acc:24042]	5	DOWN
ENSGALT00000021607	28.6653	95.7255	1.7396	0.149592	chr1	66989113	67001063	CMAS	cytidine_monophosphate_N-acetylneuraminic_acid_synthetase	5	DOWN
ENSGALT00000031871	29.6891	97.6791	1.71812	0.149823	chr3	34322338	34455636	AKT3	v-akt_murine_thymoma_viral_oncogene_homolog_3_(protein_kinase_B,_gamma)	5	DOWN
ENSGALT00000032852	29.6891	97.6791	1.71812	0.149823	chrZ	16411043	16453742	-	-	5	DOWN
ENSGALT00000009109	13.3089	63.4914	2.25417	0.149832	chr6	16494813	16529024	PSD	pleckstrin_and_Sec7_domain_containing	5	DOWN
ENSGALT00000002650	60.4019	153.356	1.34422	0.151953	chr22	1561513	1572900	LZTS1	leucine_zipper,_putative_tumor_suppressor_1	5	DOWN
ENSGALT00000044669	39.9267	116.238	1.54166	0.153603	chr5	39826228	39837879	DIO2	deiodinase,_iodothyronine,_type_II	5	DOWN
ENSGALT00000015324	26.6178	90.8416	1.77096	0.153889	chr2	22758019	22774675	-	-	5	DOWN
ENSGALT00000004947	78.8296	182.66	1.21235	0.159748	chr22	2219555	2228649	RAB11FIP1	RAB11_family_interacting_protein_1_(class_I)	5	DOWN
ENSGALT00000017559	73.7108	173.869	1.23805	0.160253	chr2	28532373	28536155	SOSTDC1	sclerostin_domain_containing_1	5	DOWN
ENSGALT00000008962	56.3068	143.588	1.35056	0.161747	chr5	7749382	7960005	GALNTL4	UDP-N-acetyl-alpha-D-galactosamine:polypeptide_N-acetylgalactosaminyltransferase-like_4	5	DOWN
ENSGALT00000002152	4.09504	38.0948	3.21765	0.162215	chr10	2032640	2055582	SEMA7A	semaphorin_7A,_GPI_membrane_anchor_(John_Milton_Hagen_blood_group)	5	DOWN
ENSGALT00000045365	65.5207	159.217	1.28097	0.162785	chr9	1743356	1751261	PLEKHB2	pleckstrin_homology_domain_containing,_family_B_(evectins)_member_2	5	DOWN
ENSGALT00000045446	13.3089	61.5378	2.20908	0.163043	chr2	32791505	32793226	HOXA1	homeobox_A1	5	DOWN
ENSGALT00000019090	53.2355	137.728	1.37136	0.16372	chr7	25983767	26039837	DIRC2	disrupted_in_renal_carcinoma_2	5	DOWN
ENSGALT00000012978	44.0217	121.122	1.46018	0.164929	chr20	13811823	13824523	PARD6B	par-6_partitioning_defective_6_homolog_beta_(C._elegans)	5	DOWN
ENSGALT00000042689	56.3068	142.611	1.34071	0.165613	chr5	7717032	7962224	GALNTL4	UDP-N-acetyl-alpha-D-galactosamine:polypeptide_N-acetylgalactosaminyltransferase-like_4	5	DOWN
ENSGALT00000009820	19.4514	74.2361	1.93224	0.166231	chr4	3824470	3937271	GPC3	glypican_3	5	DOWN
ENSGALT00000043040	35.8316	105.493	1.55785	0.168483	chr1	73271525	73291016	C12orf5	chromosome_12_open_reading_frame_5	5	DOWN
ENSGALT00000011524	31.7366	97.6791	1.6219	0.16955	chr24	5106237	5107725	APOA1	apolipoprotein_A-I	5	DOWN
ENSGALT00000003129	38.9029	110.377	1.5045	0.172042	chrZ	8422479	8433634	FANCG	Fanconi_anemia,_complementation_group_G	5	DOWN
ENSGALT00000020648	6.14256	42.9788	2.80671	0.17211	chr2	56697423	56780391	NFATC1	nuclear_factor_of_activated_T-cells,_cytoplasmic,_calcineurin-dependent_1	5	DOWN
ENSGALT00000017640	4.09504	37.1181	3.18017	0.172186	chr2	29228467	29653602	HDAC9	histone_deacetylase_9	5	DOWN
ENSGALT00000020179	14.3326	62.5146	2.12489	0.172224	chr2	52241075	52264205	-	-	5	DOWN
ENSGALT00000030841	25.594	84.9808	1.73133	0.175249	chr2	125273981	125333683	TRIQK	Uncharacterized_protein_[Source:UniProtKB/TrEMBL;Acc:E1BUC7]	5	DOWN
ENSGALT00000017616	8.19008	47.8628	2.54695	0.175875	chr2	28893078	28948048	AHR	aryl_hydrocarbon_receptor	5	DOWN
ENSGALT00000018100	10.2376	52.7467	2.3652	0.176323	chr7	20637421	20676092	DPP4	dipeptidyl-peptidase_4_(CD26,_adenosine_deaminase_complexing_protein_2)	5	DOWN
ENSGALT00000040944	46.0692	122.099	1.40617	0.177049	chr6	9220413	9297361	SGMS1	sphingomyelin_synthase_1	5	DOWN
ENSGALT00000006631	19.4514	72.2825	1.89377	0.178868	chr20	5699880	5712513	ADA	adenosine_deaminase	5	DOWN
ENSGALT00000026696	19.4514	72.2825	1.89377	0.178868	chr1	120680044	120774095	REPS2	RALBP1_associated_Eps_domain_containing_2	5	DOWN
ENSGALT00000024999	34.8079	101.586	1.54522	0.178924	chr2	113502154	113517713	TTPA	tocopherol_(alpha)_transfer_protein	5	DOWN
ENSGALT00000028025	4.09504	36.1413	3.1417	0.18273	chr1	193685558	193688666	FOLR1	folate_receptor_1_(adult)	5	DOWN
ENSGALT00000036374	4.09504	36.1413	3.1417	0.18273	chr1	193685571	193688956	FOLR1	folate_receptor_1_(adult)	5	DOWN
ENSGALT00000044820	4.09504	36.1413	3.1417	0.18273	-	-	-	RAB25	RAB25,_member_RAS_oncogene_family_[Source:HGNC_Symbol;Acc:18238]	5	DOWN
ENSGALT00000025974	13.3089	58.6075	2.13869	0.184881	chr2	134048832	134252747	TRPS1	trichorhinophalangeal_syndrome_I	5	DOWN
ENSGALT00000019117	69.6157	160.194	1.20233	0.185444	chr5	6353276	6442756	HIPK3	homeodomain_interacting_protein_kinase_3	5	DOWN
ENSGALT00000000956	30.7128	92.7951	1.59521	0.186018	chr27	1430462	1500256	MYO1D	myosin_ID	5	DOWN
ENSGALT00000021558	68.592	158.24	1.206	0.186482	chr2	87893689	87919460	GALNT12	UDP-N-acetyl-alpha-D-galactosamine:polypeptide_N-acetylgalactosaminyltransferase_12_(GalNAc-T12)	5	DOWN
ENSGALT00000027141	14.3326	60.561	2.07908	0.186843	chr1	135926351	136157713	SH3RF3	SH3_domain_containing_ring_finger_3	5	DOWN
ENSGALT00000003315	11.2614	53.7235	2.25417	0.187803	chr21	2854549	2865854	PLEKHN1	Uncharacterized_protein_[Source:UniProtKB/TrEMBL;Acc:F1NY73]	5	DOWN
NM_001081503	1.03024	30.0899	4.86822	0.188249	chrZ	12698283	12708954	PTGER4	prostaglandin_E_receptor_4_(subtype_EP4)	5	DOWN
ENSGALT00000024529	7.16632	43.9556	2.61674	0.188372	-	-	-	-	-	5	DOWN
ENSGALT00000010149	56.3068	136.751	1.28017	0.19063	chr11	17944300	17988567	GALNS	Galactosamine_(N-acetyl)-6-sulfate_sulfatase_(Morquio_syndrome,_mucopolysaccharidosis_type_IVA)	5	DOWN
ENSGALT00000010963	6.14256	41.0252	2.7396	0.191429	chr12	11514296	11516739	KLHDC8B	kelch_domain_containing_8B	5	DOWN
ENSGALT00000006768	38.9029	106.47	1.4525	0.192153	chr14	3084878	3101764	SNX8	Sorting_nexin_8	5	DOWN
ENSGALT00000017089	5.1188	38.0948	2.89572	0.193474	chr8	21506672	21529836	SLC5A9	Solute_carrier_family_5_(sodium/glucose_cotransporter),_member_9	5	DOWN
ENSGALT00000004776	4.09504	35.1645	3.10217	0.193875	chr10	3130408	3135905	CHRNA5	cholinergic_receptor,_nicotinic,_alpha_5	5	DOWN
ENSGALT00000018315	11.2614	52.7467	2.2277	0.19624	chr4	46222166	46249662	CDS1	CDP-diacylglycerol_synthase_(phosphatidate_cytidylyltransferase)_1	5	DOWN
ENSGALT00000025054	30.7128	90.8416	1.56451	0.197669	chrZ	64961496	65028223	-	-	5	DOWN
ENSGALT00000017994	21.499	73.2593	1.76874	0.20006	chr2	32350695	32384116	SNX10	sorting_nexin_10	5	DOWN
ENSGALT00000005866	51.188	126.006	1.29961	0.200675	chr6	9237475	9298611	SGMS1	sphingomyelin_synthase_1	5	DOWN
ENSGALT00000021093	6.14256	40.0484	2.70483	0.201824	chr1	59115779	59189015	FGD4	FYVE,_RhoGEF_and_PH_domain_containing_4	5	DOWN
ENSGALT00000042758	58.3543	137.728	1.2389	0.201955	-	-	-	-	-	5	DOWN
ENSGALT00000015300	15.3564	60.561	1.97955	0.20394	chr1	24797124	24882798	MET	met_proto-oncogene_(hepatocyte_growth_factor_receptor)	5	DOWN
ENSGALT00000007949	15.3564	60.561	1.97955	0.20394	chr9	8750614	8782383	RHBDD1	rhomboid_domain_containing_1	5	DOWN
ENSGALT00000006974	17.4039	64.4682	1.88917	0.205811	chr18	8451085	8452375	KCNJ16	potassium_inwardly-rectifying_channel,_subfamily_J,_member_16	5	DOWN
ENSGALT00000037506	21.499	72.2825	1.74938	0.207137	chr3	52145373	52255811	GPR126	G_protein-coupled_receptor_126	5	DOWN
ENSGALT00000005977	45.0455	114.285	1.34318	0.207509	chr11	5725576	5829415	NKD1	naked_cuticle_homolog_1_(Drosophila)	5	DOWN
ENSGALT00000021822	57.3306	133.82	1.22292	0.212681	chrZ	10796193	10838397	LMBRD2	LMBR1_domain_containing_2	5	DOWN
ENSGALT00000014255	44.0217	111.354	1.33887	0.21411	chr8	15399749	15414613	SSX2IP	synovial_sarcoma,_X_breakpoint_2_interacting_protein	5	DOWN
ENSGALT00000021781	59.3781	136.751	1.20355	0.21479	chr25	273225	295312	OTUD7B	OTU_domain_containing_7B	5	DOWN
ENSGALT00000020569	3.07128	30.2805	3.30148	0.21734	chrZ	40523517	40576398	AGTPBP1	ATP/GTP_binding_protein_1	5	DOWN
ENSGALT00000043353	9.21384	45.9092	2.31691	0.21776	chrZ	80799752	80812305	LOX	lysyl_oxidase	5	DOWN
ENSGALT00000029461	9.21384	45.9092	2.31691	0.21776	chrZ	1242943	1267970	SMAD7A	TGF-beta_signal_pathway_antagonist_Smad7_[Source:RefSeq_peptide;Acc:NP_001153135]	5	DOWN
ENSGALT00000000419	26.6178	80.0969	1.58936	0.219526	chr26	774173	777490	TNNI1	troponin_I_type_1_(skeletal,_slow)	5	DOWN
ENSGALT00000042975	26.6178	80.0969	1.58936	0.219526	-	-	-	BCDIN3D	BCDIN3_domain_containing_[Source:HGNC_Symbol;Acc:27050]	5	DOWN
ENSGALT00000024580	42.9979	108.424	1.33434	0.221012	chr3	66327019	66334932	ZBTB24	zinc_finger_and_BTB_domain_containing_24	5	DOWN
ENSGALT00000026654	20.4752	68.3754	1.7396	0.222159	chr1	119835500	119872605	PHKA2	phosphorylase_kinase,_alpha_2_(liver)	5	DOWN
ENSGALT00000025239	30.7128	86.9344	1.50109	0.222968	chr2	117820323	117897580	JPH1	junctophilin_1	5	DOWN
ENSGALT00000014545	6.14256	38.0948	2.63268	0.224188	chr8	17817584	17833703	NEXN	nexilin_(F_actin_binding_protein)	5	DOWN
NM_213575	57.6937	138.802	1.26654	0.226063	chr1	112078681	112079701	MID1IP1	MID1_interacting_protein_1_(gastrulation_specific_G12_homolog_(zebrafish))	5	DOWN
ENSGALT00000043855	33.7841	91.8184	1.44244	0.226298	chr2	75643884	75709051	FAM134B	family_with_sequence_similarity_134,_member_B_[Source:HGNC_Symbol;Acc:25964]	5	DOWN
ENSGALT00000008583	2.04752	26.3734	3.68713	0.226788	chr20	8368250	8377966	GATA5	GATA_binding_protein_5	5	DOWN
ENSGALT00000011646	2.04752	26.3734	3.68713	0.226788	chr9	12623431	12626925	HRASLS	HRAS-like_suppressor	5	DOWN
ENSGALT00000023658	9.21384	44.9324	2.28588	0.228075	chrZ	56954952	56986064	PCSK1	proprotein_convertase_subtilisin/kexin_type_1_[Source:HGNC_Symbol;Acc:8743]	5	DOWN
ENSGALT00000045642	9.21384	44.9324	2.28588	0.228075	chr2	326976	336833	KCNH2	potassium_voltage-gated_channel,_subfamily_H_(eag-related),_member_2_[Source:HGNC_Symbol;Acc:6251]	5	DOWN
ENSGALT00000008287	1.02376	22.4662	4.45581	0.229196	chr12	6282466	6367527	PHF2	PHD_finger_protein_2	5	DOWN
ENSGALT00000043566	45.0455	110.377	1.29299	0.229747	chr27	4448702	4462843	TNS4	tensin_4_[Source:HGNC_Symbol;Acc:24352]	5	DOWN
ENSGALT00000021202	7.16632	40.0484	2.48244	0.230357	chr1	60438889	60496703	B4GALNT3	beta-1,4-N-acetyl-galactosaminyl_transferase_3	5	DOWN
ENSGALT00000045420	30.7128	84.9808	1.4683	0.236675	chr17	4820724	4824113	NAIF1	nuclear_apoptosis_inducing_factor_1_[Source:HGNC_Symbol;Acc:25446]	5	DOWN
ENSGALT00000026223	13.3089	52.7467	1.98669	0.236757	chr1	112524770	112542156	XK	X-linked_Kx_blood_group	5	DOWN
ENSGALT00000025070	15.3564	56.6539	1.88333	0.238391	chrZ	64830089	64898868	GRIN3A	glutamate_receptor,_ionotropic,_N-methyl-D-aspartate_3A	5	DOWN
ENSGALT00000019129	9.21384	43.9556	2.25417	0.238832	chr2	42926895	42952850	NPHP3	nephronophthisis_3_(adolescent)	5	DOWN
ENSGALT00000026054	46.0692	110.377	1.26057	0.239966	chr2	145578789	145615737	DENND3	DENN/MADD_domain_containing_3	5	DOWN
ENSGALT00000028027	5.1188	34.1877	2.7396	0.241311	chr1	193716132	193717673	HBG1	hemoglobin,_gamma_A	5	DOWN
ENSGALT00000016803	25.594	75.2129	1.55517	0.242423	chr5	37546188	37550495	JDP2	Jun_dimerization_protein_2	5	DOWN
ENSGALT00000032408	30.7128	84.004	1.45162	0.243807	chr4	2122994	2142344	F8	coagulation_factor_VIII,_procoagulant_component	5	DOWN
NM_204282	17.5142	66.9744	1.93509	0.244259	chr2	59814347	59814792	ID4	inhibitor_of_DNA_binding_4,_dominant_negative_helix-loop-helix_protein	5	DOWN
ENSGALT00000006237	23.5465	71.3057	1.59851	0.244376	chr14	2252289	2258784	-	-	5	DOWN
ENSGALT00000043707	4.09504	31.2573	2.93224	0.245071	chr5	37393656	37400127	PGF	placental_growth_factor_[Source:HGNC_Symbol;Acc:8893]	5	DOWN
ENSGALT00000009675	29.6891	82.0504	1.46658	0.245161	chr20	9800880	9833823	-	-	5	DOWN
ENSGALT00000039481	3.07128	28.3269	3.20526	0.246348	chr4	12044626	12058058	CDX4	caudal_type_homeobox_4	5	DOWN
ENSGALT00000019840	41.9742	102.563	1.28894	0.246767	chr1	50490803	50492294	MGAT3	mannosyl_(beta-1,4-)-glycoprotein_beta-1,4-N-acetylglucosaminyltransferase	5	DOWN
ENSGALT00000027237	37.8791	95.7255	1.3375	0.24701	chr1	142008008	142023348	ERCC5	excision_repair_cross-complementing_rodent_repair_deficiency,_complementation_group_5_(xeroderma_pigmentosum,_complementation_group_G_(Cockayne_syndrome))	5	DOWN
ENSGALT00000007864	14.3326	53.7235	1.90625	0.247342	chr19	6999879	7048320	DOC2B	double_C2-like_domains,_beta_[Source:HGNC_Symbol;Acc:2986]	5	DOWN
ENSGALT00000042870	25.594	74.2361	1.53631	0.250272	-	-	-	DOK1	docking_protein_1,_62kDa_(downstream_of_tyrosine_kinase_1)_[Source:HGNC_Symbol;Acc:2990]	5	DOWN
ENSGALT00000025131	30.7128	83.0272	1.43474	0.251129	chr2	116069827	116132391	SLCO5A1	Solute_carrier_organic_anion_transporter_family,_member_5A1	5	DOWN
ENSGALT00000005435	7.16632	38.0948	2.41029	0.254403	chr11	2943081	2953938	-	-	5	DOWN
ENSGALT00000008499	11.2614	46.886	2.05777	0.254521	chr6	15752204	15762949	ANXA7	annexin_A7	5	DOWN
ENSGALT00000006107	20.4752	64.4682	1.65471	0.255395	chr27	4509843	4514239	KRT12	Uncharacterized_protein_[Source:UniProtKB/TrEMBL;Acc:F1NDN6]	5	DOWN
ENSGALT00000000407	12.2851	48.8395	1.99114	0.25587	chr28	99391	152730	LASS4	LAG1_homolog,_ceramide_synthase_4	5	DOWN
ENSGALT00000010764	13.3089	50.7931	1.93224	0.256768	chr9	3116729	3147814	MAP3K13	mitogen-activated_protein_kinase_kinase_kinase_13	5	DOWN
ENSGALT00000020297	15.3564	54.7003	1.83271	0.257507	chr1	51000074	51005700	-	-	5	DOWN
ENSGALT00000001453	41.9742	100.609	1.26119	0.259853	chr20	49681	67792	L3MBTL1	Lethal(3)malignant_brain_tumor-like_protein_1_[Source:UniProtKB/Swiss-Prot;Acc:E1C2V1]	5	DOWN
ENSGALT00000009008	2.04752	24.4198	3.5761	0.259981	chr6	16356821	16374750	PITX3	paired-like_homeodomain_3	5	DOWN
ENSGALT00000022862	6.14256	35.1645	2.51721	0.262001	chr1	68489590	68490658	A4GALT	alpha_1,4-galactosyltransferase_(globotriaosylceramide_synthase)	5	DOWN
ENSGALT00000024538	3.07128	27.3501	3.15464	0.262158	chr1	83010007	83046065	F5	coagulation_factor_V_(proaccelerin,_labile_factor)	5	DOWN
ENSGALT00000036284	10.2376	43.9556	2.10217	0.264012	chr12	2494175	2539876	BSN	bassoon_presynaptic_cytomatrix_protein_[Source:HGNC_Symbol;Acc:1117]	5	DOWN
ENSGALT00000023516	20.4752	63.4914	1.63268	0.264367	-	-	-	-	-	5	DOWN
ENSGALT00000024766	31.7366	83.0272	1.38744	0.26456	chr1	84799654	84816004	NFKBIZ	nuclear_factor_of_kappa_light_polypeptide_gene_enhancer_in_B-cells_inhibitor,_zeta	5	DOWN
ENSGALT00000005924	17.4039	57.6307	1.72742	0.266796	chrZ	11866373	11907285	LIFR	leukemia_inhibitory_factor_receptor_alpha	5	DOWN
ENSGALT00000020841	1.02376	20.5126	4.32456	0.267416	chr2	63340765	63351273	-	-	5	DOWN
ENSGALT00000014433	14.3326	51.7699	1.85281	0.267599	chr17	1365414	1417184	RGS3	regulator_of_G-protein_signalling_3	5	DOWN
NM_204303	19.5746	67.945	1.79538	0.268438	chr3	77171436	77328216	ME1	malic_enzyme_1,_NADP(+)-dependent,_cytosolic	5	DOWN
ENSGALT00000040258	8.19008	39.0716	2.25417	0.271113	chr14	7016035	7025853	HS3ST2	heparan_sulfate_(glucosamine)_3-O-sulfotransferase_2	5	DOWN
ENSGALT00000018274	4.09504	29.3037	2.83913	0.275084	chr4	45865767	45881971	HELQ	Helicase,_POLQ-like	5	DOWN
ENSGALT00000032726	6.14256	34.1877	2.47656	0.275835	chr5	9018985	9020998	-	-	5	DOWN
ENSGALT00000023171	10.2376	42.9788	2.06975	0.275859	chr4	69799892	69923066	ARAP2	ArfGAP_with_RhoGAP_domain,_ankyrin_repeat_and_PH_domain_2_[Source:HGNC_Symbol;Acc:16924]	5	DOWN
ENSGALT00000030996	17.4039	56.6539	1.70276	0.276712	chr2	84632424	84785709	PTPN3	protein_tyrosine_phosphatase,_non-receptor_type_3	5	DOWN
ENSGALT00000027626	12.2851	46.886	1.93224	0.277932	chr1	175770578	175792411	WASF3	WAS_protein_family,_member_3	5	DOWN
ENSGALT00000017917	15.3564	52.7467	1.78024	0.277978	chr3	37810328	37958574	SLC35F3	solute_carrier_family_35,_member_F3	5	DOWN
ENSGALT00000043526	14.3326	50.7931	1.82533	0.278272	chr2	41855712	41908175	ZNRF2	Zinc_and_ring_finger_2	5	DOWN
ENSGALT00000028029	31.7366	81.0737	1.35309	0.280286	chr1	193727982	193730347	HBE	hemoglobin,_beta	5	DOWN
ENSGALT00000008831	7.16632	36.1413	2.33434	0.280694	chr7	6597660	6621009	-	-	5	DOWN
ENSGALT00000012346	20.4752	61.5378	1.5876	0.283154	chr14	12417757	12419761	C16ORF5	C16ORF5	5	DOWN
ENSGALT00000006182	23.5465	66.4218	1.49614	0.287711	chr13	10842857	11150740	SGCD	sarcoglycan,_delta_(35kDa_dystrophin-associated_glycoprotein)	5	DOWN
ENSGALT00000018431	38.9029	91.8184	1.2389	0.287739	chr3	41356970	41382846	KIF25	kinesin_family_member_25	5	DOWN
ENSGALT00000020302	10.2376	42.002	2.03658	0.288178	chr1	51010960	51014093	LGALS1	lectin,_galactoside-binding,_soluble,_1	5	DOWN
ENSGALT00000027027	1.02376	19.5358	4.25417	0.288716	chr1	130620079	130675538	GABRA5	gamma-aminobutyric_acid_(GABA)_A_receptor,_alpha_5	5	DOWN
ENSGALT00000019611	15.3564	51.7699	1.75327	0.288745	chr4	55856552	55899875	UGT8	UDP_glycosyltransferase_8	5	DOWN
ENSGALT00000024052	34.8079	84.9808	1.28772	0.289578	chrZ	16311845	16329239	SNX18	Uncharacterized_protein_[Source:UniProtKB/TrEMBL;Acc:E1C4N7]	5	DOWN
ENSGALT00000023753	26.6178	71.3057	1.42163	0.290888	chrZ	18735255	18767868	ELOVL7	ELOVL_family_member_7,_elongation_of_long_chain_fatty_acids_(yeast)	5	DOWN
ENSGALT00000009388	18.4277	56.6539	1.6203	0.296123	chr14	6438031	6456071	CASKIN1	CASK_interacting_protein_1	5	DOWN
ENSGALT00000015303	3.07128	25.3966	3.04772	0.296605	chr1	24999076	25013429	CAV1	caveolin_1,_caveolae_protein,_22kDa	5	DOWN
ENSGALT00000042947	3.07128	25.3966	3.04772	0.296605	chr6	21051931	21053666	VENTX	VENT_homeobox_[Source:HGNC_Symbol;Acc:13639]	5	DOWN
ENSGALT00000010580	2.04752	22.4662	3.45581	0.297646	chr5	13094003	13110393	TH	tyrosine_hydroxylase	5	DOWN
ENSGALT00000036275	2.04752	22.4662	3.45581	0.297646	chr12	4379531	4465392	ATG7	ATG7_autophagy_related_7_homolog_(S._cerevisiae)	5	DOWN
ENSGALT00000010657	8.19008	37.1181	2.18017	0.297768	chr5	13487246	13490212	SYT8	synaptotagmin_VIII	5	DOWN
NM_001037830	45.3308	106.771	1.23595	0.299151	chr20	9810335	9835998	UCKL1	uridine-cytidine_kinase_1-like_1	5	DOWN
ENSGALT00000044316	30.7128	77.1665	1.32913	0.299286	chr5	188164	199244	ALDH3B1	Aldehyde_dehydrogenase_[Source:UniProtKB/TrEMBL;Acc:E1C078]	5	DOWN
ENSGALT00000002716	15.3564	50.7931	1.72579	0.299878	chr21	2410358	2443945	ACAP3	Uncharacterized_protein_[Source:UniProtKB/TrEMBL;Acc:F1NGZ5]	5	DOWN
ENSGALT00000014655	10.2376	41.0252	2.00263	0.300982	chr2	21523764	21533990	STEAP1	six_transmembrane_epithelial_antigen_of_the_prostate_1	5	DOWN
ENSGALT00000003817	10.2376	41.0252	2.00263	0.300982	chr18	4763900	4774954	C17ORF109	uncharacterized_protein_LOC770371_[Source:RefSeq_peptide;Acc:NP_001156475]	5	DOWN
ENSGALT00000031243	38.9029	89.8648	1.20788	0.303227	chr2	16105775	16110294	-	-	5	DOWN
ENSGALT00000018064	28.6653	73.2593	1.35371	0.304257	chr3	39337938	39339803	ACTA1	actin,_alpha_1,_skeletal_muscle	5	DOWN
ENSGALT00000005893	19.4514	57.6307	1.56696	0.304978	chr21	4312360	4316769	CLCNKB	chloride_channel_Kb	5	DOWN
ENSGALT00000013750	19.4514	57.6307	1.56696	0.304978	chr5	23292380	23294330	CHST1	carbohydrate_(keratan_sulfate_Gal-6)_sulfotransferase_1	5	DOWN
ENSGALT00000025160	27.6415	71.3057	1.36718	0.306763	chr3	74768581	74811042	BACH2	BTB_and_CNC_homology_1,_basic_leucine_zipper_transcription_factor_2	5	DOWN
ENSGALT00000004467	4.09504	27.3501	2.7396	0.308399	chr19	5331520	5336684	SCARF1	scavenger_receptor_class_F,_member_1	5	DOWN
ENSGALT00000019399	22.5227	62.5146	1.47281	0.30912	chr5	53951086	54056201	-	-	5	DOWN
ENSGALT00000026386	16.3802	51.7699	1.66016	0.309995	chr3	91217030	91241120	C8ORF42	Uncharacterized_protein_[Source:UniProtKB/TrEMBL;Acc:F1NNS9]	5	DOWN
ENSGALT00000020498	32.7603	79.1201	1.27209	0.311419	chr1	51962484	51983162	TOM1	target_of_myb1_(chicken)	5	DOWN
ENSGALT00000009698	1.02376	18.559	4.18017	0.311603	chr2	4947533	4977259	XIRP1	xin_actin-binding_repeat_containing_1	5	DOWN
ENSGALT00000024087	1.02376	18.559	4.18017	0.311603	chr4	77624134	77625388	HS3ST1	heparan_sulfate_(glucosamine)_3-O-sulfotransferase_1	5	DOWN
ENSGALT00000010518	1.02376	18.559	4.18017	0.311603	chr24	3026785	3066936	CLMP	Uncharacterized_protein_[Source:UniProtKB/TrEMBL;Acc:E1BXB7]	5	DOWN
ENSGALT00000014550	13.3089	45.9092	1.78639	0.313539	chr3	13125327	13287642	PAK7	p21(CDKN1A)-activated_kinase_7	5	DOWN
ENSGALT00000023979	31.7366	77.1665	1.28183	0.314214	chrZ	13472983	13485439	ZNF131	zinc_finger_protein_131	5	DOWN
ENSGALT00000018212	10.2376	40.0484	1.96787	0.314288	chr2	34369171	34374862	WIPF3	WAS/WASL_interacting_protein_family,_member_3	5	DOWN
ENSGALT00000007266	3.07128	24.4198	2.99114	0.315329	chr17	5394146	5399935	PHYHD1	phytanoyl-CoA_dioxygenase_domain_containing_1	5	DOWN
ENSGALT00000015480	26.6178	68.3754	1.36109	0.318849	chr5	28133627	28138875	PIGH	phosphatidylinositol_glycan_anchor_biosynthesis,_class_H	5	DOWN
ENSGALT00000043593	16.3802	50.7931	1.63268	0.321566	chr8	21100765	21356721	TRABD2B	TraB_domain_containing_2B_[Source:HGNC_Symbol;Acc:44200]	5	DOWN
ENSGALT00000005793	27.6415	69.3522	1.3271	0.325724	chr19	5721552	5730117	UNC119	unc-119_homolog_(C._elegans)	5	DOWN
ENSGALT00000012664	30.7128	74.2361	1.27328	0.326261	chr14	12707720	12709772	VASN	Uncharacterized_protein_[Source:UniProtKB/TrEMBL;Acc:F1NNH6]	5	DOWN
ENSGALT00000019864	8.19008	35.1645	2.10217	0.326727	chr5	3757391	3758132	BDNF	brain-derived_neurotrophic_factor	5	DOWN
ENSGALT00000043975	12.2851	42.9788	1.80671	0.327174	chr10	426253	434155	-	-	5	DOWN
ENSGALT00000005163	18.4277	53.7235	1.54368	0.32905	chr27	4913995	4926852	PTRF	polymerase_I_and_transcript_release_factor	5	DOWN
ENSGALT00000008132	29.6891	72.2825	1.28372	0.329328	chr17	4829663	4860591	FAM102A	family_with_sequence_similarity_102,_member_A	5	DOWN
ENSGALT00000014581	5.1188	28.3269	2.4683	0.333457	chr1	22669169	22806015	PTPRZ1	protein_tyrosine_phosphatase,_receptor-type,_Z_polypeptide_1	5	DOWN
ENSGALT00000025551	3.07128	23.443	2.93224	0.335114	chr3	77130272	77137465	PRSS35	protease,_serine,_35	5	DOWN
ENSGALT00000025139	3.07128	23.443	2.93224	0.335114	chr4	80516083	80549452	ACOX3	acyl-Coenzyme_A_oxidase_3,_pristanoyl	5	DOWN
ENSGALT00000017665	20.4752	56.6539	1.4683	0.335347	chr4	44160593	44167571	AREG	amphiregulin_precursor_[Source:RefSeq_peptide;Acc:NP_001026708]	5	DOWN
ENSGALT00000003809	14.3326	45.9092	1.67948	0.337472	chr17	7745151	7755257	EGFL7	EGF-like-domain,_multiple_7	5	DOWN
ENSGALT00000013683	14.3326	45.9092	1.67948	0.337472	chr2	98462086	98504384	ANKRD12	ankyrin_repeat_domain_12	5	DOWN
ENSGALT00000012474	14.3326	45.9092	1.67948	0.337472	chr15	10027878	10036555	CARD8	caspase_recruitment_domain_family,_member_8_[Source:HGNC_Symbol;Acc:17057]	5	DOWN
ENSGALT00000044520	31.7366	74.2361	1.22597	0.34195	chr4	1656179	1659524	-	-	5	DOWN
ENSGALT00000040488	8.19008	34.1877	2.06153	0.342116	chr17	501841	504845	EX-FABP	extracellular_fatty_acid-binding_protein_precursor_[Source:RefSeq_peptide;Acc:NP_990753]	5	DOWN
ENSGALT00000014767	9.21384	36.1413	1.97177	0.342637	chr4	17651523	17658536	CD99L2	CD99_molecule-like_2	5	DOWN
NM_001030742	39.1493	91.2405	1.22069	0.34401	chr1	35073764	35097907	MDM1	Mdm4,_transformed_3T3_cell_double_minute_1,_p53_binding_protein_(mouse)	5	DOWN
ENSGALT00000018948	16.3802	48.8395	1.5761	0.345843	chr4	49571258	49794271	SLC4A4	solute_carrier_family_4,_sodium_bicarbonate_cotransporter,_member_4	5	DOWN
ENSGALT00000035442	26.6178	65.445	1.29789	0.349114	chr1	37697088	37704243	-	-	5	DOWN
ENSGALT00000005164	5.1188	27.3501	2.41767	0.351552	chr27	4919907	4926852	PTRF	polymerase_I_and_transcript_release_factor	5	DOWN
ENSGALT00000014572	3.07128	22.4662	2.87084	0.356006	chr1	22672267	22805802	PTPRZ1	protein_tyrosine_phosphatase,_receptor-type,_Z_polypeptide_1	5	DOWN
ENSGALT00000007212	3.07128	22.4662	2.87084	0.356006	chr11	8709892	8772492	TSHZ3	Teashirt_family_zinc_finger_3	5	DOWN
ENSGALT00000006646	11.2614	39.0716	1.79474	0.35614	chr14	2583592	2593176	GAA	glucosidase,_alpha;_acid_(Pompe_disease,_glycogen_storage_disease_type_II)	5	DOWN
ENSGALT00000043146	10.2376	37.1181	1.85824	0.357354	chr21	2847288	2856043	C1orf170	chromosome_1_open_reading_frame_170_[Source:HGNC_Symbol;Acc:28208]	5	DOWN
ENSGALT00000006971	8.19008	33.2109	2.01971	0.358136	chr18	8260525	8295962	MAP2K6	mitogen-activated_protein_kinase_kinase_6_[Source:HGNC_Symbol;Acc:6846]	5	DOWN
ENSGALT00000040596	8.19008	33.2109	2.01971	0.358136	chr14	5987733	5992306	-	-	5	DOWN
ENSGALT00000017374	20.4752	54.7003	1.41767	0.358455	chr5	43240581	43373750	TTC7B	tetratricopeptide_repeat_domain_7B	5	DOWN
ENSGALT00000008901	16.3802	47.8628	1.54695	0.358567	chr19	8743458	8748278	CUEDC1	CUE_domain_containing_1_[Source:HGNC_Symbol;Acc:31350]	5	DOWN
ENSGALT00000044458	29.6891	69.3522	1.22401	0.359041	-	-	-	-	-	5	DOWN
ENSGALT00000016800	19.4514	52.7467	1.4392	0.36179	chr1	39159692	39381655	SYT1	synaptotagmin_I	5	DOWN
ENSGALT00000043261	19.4514	52.7467	1.4392	0.36179	chr1	39238869	39381692	SYT1	synaptotagmin_I	5	DOWN
ENSGALT00000021177	1.02376	16.6054	4.01971	0.362521	chr11	14761129	14784372	CDYL2	chromodomain_protein,_Y-like_2	5	DOWN
ENSGALT00000023074	1.02376	16.6054	4.01971	0.362521	chr4	68424645	68437194	NSUN7	NOL1/NOP2/Sun_domain_family,_member_7	5	DOWN
ENSGALT00000026675	2.04752	19.5358	3.25417	0.363585	chr1	119936877	120009401	CDKL5	cyclin-dependent_kinase-like_5	5	DOWN
ENSGALT00000013524	2.04752	19.5358	3.25417	0.363585	chr12	18572198	18575093	BHLHE40	Uncharacterized_protein_[Source:UniProtKB/TrEMBL;Acc:E1BQW8]	5	DOWN
ENSGALT00000042104	2.04752	19.5358	3.25417	0.363585	chr2	22840864	22840957	gga-mir-1650	gga-mir-1650_[Source:miRBase;Acc:MI0007382]	5	DOWN
ENSGALT00000000505	14.3326	43.9556	1.61674	0.364067	chr4	11423396	11425746	-	-	5	DOWN
ENSGALT00000004279	4.09504	24.4198	2.5761	0.365173	chrZ	1060882	1069738	LIPG	Lipase,_endothelial	5	DOWN
ENSGALT00000025017	13.3089	42.002	1.65807	0.366614	chr3	71939186	72029882	KLHL32	kelch-like_32_(Drosophila)	5	DOWN
ENSGALT00000011424	17.4039	48.8395	1.48864	0.368423	chr9	12291915	12293004	FAM43A	family_with_sequence_similarity_43,_member_A	5	DOWN
ENSGALT00000015306	5.1188	26.3734	2.3652	0.370507	chr1	25020202	25028544	CAV2	caveolin_2	5	DOWN
ENSGALT00000018296	5.1188	26.3734	2.3652	0.370507	chr5	48441121	48448485	SLC25A29	Solute_carrier_family_25,_member_29	5	DOWN
ENSGALT00000015117	11.2614	38.0948	1.75821	0.371057	chr5	25464270	25468294	-	-	5	DOWN
ENSGALT00000022381	10.2376	36.1413	1.81977	0.372809	chr2	95477060	95554752	CDH7	cadherin_7,_type_2	5	DOWN
ENSGALT00000022928	6.14256	28.3269	2.20526	0.373409	chr21	4844038	4845148	PLA2G2A	phospholipase_A2,_group_IIA_(platelets,_synovial_fluid)	5	DOWN
ENSGALT00000044673	6.14256	28.3269	2.20526	0.373409	chr1	51065195	51067106	CDC42EP1	CDC42_effector_protein_(Rho_GTPase_binding)_1_[Source:HGNC_Symbol;Acc:17014]	5	DOWN
ENSGALT00000010867	28.6653	66.4218	1.21235	0.373488	chr5	14079794	14176709	-	-	5	DOWN
ENSGALT00000037574	7.16632	30.2805	2.07908	0.374678	chr2	44581824	44626570	MYRIP	myosin_VIIA_and_Rab_interacting_protein	5	DOWN
NM_001163003	10.3024	40.767	1.98442	0.375455	chr18	4763901	4774954	LOC770371/possibly small integral membrane protein 5-like	hypothetical_protein_LOC770371	5	DOWN
ENSGALT00000012287	3.07128	21.4894	2.80671	0.378048	chr12	14620836	14643753	-	-	5	DOWN
NM_001004391	29.8771	72.7983	1.28486	0.381688	chr20	7583704	7996525	CDH4	cadherin_4,_type_1,_R-cadherin_(retinal)	5	DOWN
ENSGALT00000025905	23.5465	57.6307	1.29132	0.382856	chr2	129741850	129767801	DPYS	dihydropyrimidinase	5	DOWN
ENSGALT00000006682	12.2851	39.0716	1.66921	0.383885	chr14	2611417	2615264	TMEM184A	transmembrane_protein_184A	5	DOWN
ENSGALT00000024563	25.594	60.561	1.24258	0.386105	chr2	107351680	107386641	-	-	5	DOWN
ENSGALT00000044251	11.2614	37.1181	1.72074	0.38651	chr3	31278222	31281746	CYP1B1	cytochrome_P450,_family_1,_subfamily_B,_polypeptide_1	5	DOWN
ENSGALT00000040339	11.2614	37.1181	1.72074	0.38651	chr3	373632	434893	CCDC85A	coiled-coil_domain_containing_85A_[Source:HGNC_Symbol;Acc:29400]	5	DOWN
ENSGALT00000026103	2.04752	18.559	3.18017	0.38833	chr2	144604863	144683639	KCNK9	Potassium_channel,_subfamily_K,_member_9	5	DOWN
ENSGALT00000002458	5.1188	25.3966	2.31076	0.39035	chr1	192207764	192221005	AQP11	aquaporin_11	5	DOWN
ENSGALT00000025056	1.02376	15.6287	3.93224	0.390751	chrZ	64949131	64957855	ALDOB	aldolase_B,_fructose-bisphosphate	5	DOWN
ENSGALT00000039389	1.02376	15.6287	3.93224	0.390751	chr20	10230158	10233326	RSPO4	R-spondin_4_[Source:HGNC_Symbol;Acc:16175]	5	DOWN
ENSGALT00000003121	1.02376	15.6287	3.93224	0.390751	chr21	2679189	2699394	-	-	5	DOWN
ENSGALT00000027875	6.14256	27.3501	2.15464	0.392327	chr1	188021744	188022863	PRSS23	protease,_serine,_23	5	DOWN
ENSGALT00000004146	7.16632	29.3037	2.03178	0.392766	chr19	5084354	5129148	FAM211A	Uncharacterized_protein_[Source:UniProtKB/TrEMBL;Acc:E1C0N0]	5	DOWN
ENSGALT00000009095	19.4514	49.8163	1.35674	0.400077	chr10	10084219	10088747	DTWD1	Uncharacterized_protein_[Source:UniProtKB/TrEMBL;Acc:E1C9D8]	5	DOWN
ENSGALT00000007167	4.09504	22.4662	2.45581	0.407967	chr20	5928135	5935198	SLC2A10	solute_carrier_family_2_(facilitated_glucose_transporter),_member_10	5	DOWN
ENSGALT00000020178	9.21384	32.2341	1.80671	0.408052	chr2	52203859	52216106	BLVRA	Biliverdin_reductase_A	5	DOWN
ENSGALT00000000837	9.21384	32.2341	1.80671	0.408052	chr28	815693	827123	MARCH2	membrane-associated_ring_finger_(C3HC4)_2	5	DOWN
ENSGALT00000037308	8.19008	30.2805	1.88644	0.410166	chr1	71411619	71442947	PPAR	peroxisome_proliferator-activated_receptor_alpha_[Source:RefSeq_peptide;Acc:NP_001001464]	5	DOWN
ENSGALT00000007393	5.1188	24.4198	2.25417	0.411108	chr10	8334754	8365618	MYO5C	myosin_VC	5	DOWN
ENSGALT00000023574	6.14256	26.3734	2.10217	0.412068	chr10	16795492	16809456	CERS3	ceramide_synthase_3_[Source:HGNC_Symbol;Acc:23752]	5	DOWN
ENSGALT00000008573	6.14256	26.3734	2.10217	0.412068	chr11	13255161	13323250	ADAMTS18	ADAM_metallopeptidase_with_thrombospondin_type_1_motif,_18_[Source:HGNC_Symbol;Acc:17110]	5	DOWN
ENSGALT00000021444	22.5227	53.7235	1.25417	0.412209	chr1	64687655	64736649	AEBP2	AE_binding_protein_2	5	DOWN
ENSGALT00000013503	16.3802	43.9556	1.4241	0.413568	chr6	23349106	23406139	SH3PXD2A	SH3_and_PX_domains_2A	5	DOWN
ENSGALT00000037604	19.4514	48.8395	1.32817	0.413583	chr2	43339785	43363519	FYCO1	FYVE_and_coiled-coil_domain_containing_1	5	DOWN
ENSGALT00000018191	2.04752	17.5822	3.10217	0.414561	chr3	39969772	40001972	TRIM67	tripartite_motif_containing_67_[Source:HGNC_Symbol;Acc:31859]	5	DOWN
ENSGALT00000022408	15.3564	42.002	1.45162	0.418133	chr3	52148763	52255579	GPR126	G_protein-coupled_receptor_126	5	DOWN
NM_205422	8.24196	33.9725	2.04331	0.419269	chr17	501845	504845	LCN8	LCN8	5	DOWN
ENSGALT00000010455	23.5465	54.7003	1.21604	0.42005	chr5	12608419	12931849	KCNQ1	potassium_voltage-gated_channel,_KQT-like_subfamily,_member_1	5	DOWN
ENSGALT00000022640	23.5465	54.7003	1.21604	0.42005	chr4	65771638	65777574	SGCB	sarcoglycan,_beta_(43kDa_dystrophin-associated_glycoprotein)	5	DOWN
ENSGALT00000037252	1.02376	14.6519	3.83913	0.420957	chr2	63540509	63597084	OFCC1	orofacial_cleft_1_candidate_1	5	DOWN
ENSGALT00000019043	1.02376	14.6519	3.83913	0.420957	chr2	42792236	42811141	ACPP	acid_phosphatase,_prostate	5	DOWN
ENSGALT00000010411	1.02376	14.6519	3.83913	0.420957	chr12	11006262	11071997	-	-	5	DOWN
ENSGALT00000013876	20.4752	49.8163	1.28274	0.422281	chr12	19731467	19749157	NR2C2	nuclear_receptor_subfamily_2,_group_C,_member_2	5	DOWN
ENSGALT00000043326	10.2376	33.2109	1.69778	0.422677	chr27	4442295	4446537	IGFBP4	insulin-like_growth_factor_binding_protein_4	5	DOWN
ENSGALT00000001524	17.4039	44.9324	1.36834	0.423385	chr19	516189	561565	RNF43	ring_finger_protein_43	5	DOWN
ENSGALT00000017040	22.5227	52.7467	1.2277	0.425289	chr5	38524086	38527515	ISM2	Uncharacterized_protein_[Source:UniProtKB/TrEMBL;Acc:F1NNP1]	5	DOWN
ENSGALT00000021310	3.07128	19.5358	2.66921	0.425761	chr1	62215177	62227083	USP18	ubiquitin_specific_peptidase_18	5	DOWN
ENSGALT00000020523	3.07128	19.5358	2.66921	0.425761	chr1	53058720	53091132	TIMP3	TIMP_metallopeptidase_inhibitor_3_(Sorsby_fundus_dystrophy,_pseudoinflammatory)	5	DOWN
ENSGALT00000043916	3.07128	19.5358	2.66921	0.425761	-	-	-	-	-	5	DOWN
ENSGALT00000039553	6.14256	25.3966	2.04772	0.432657	chr14	12661874	12681255	SRL	sarcalumenin	5	DOWN
ENSGALT00000005461	6.14256	25.3966	2.04772	0.432657	chr26	4989810	4997320	FRS3	fibroblast_growth_factor_receptor_substrate_3	5	DOWN
ENSGALT00000045438	6.14256	25.3966	2.04772	0.432657	chr1	42006974	42038172	RASSF9	Ras_association_(RalGDS/AF-6)_domain_family_(N-terminal)_member_9_[Source:HGNC_Symbol;Acc:15739]	5	DOWN
ENSGALT00000038471	5.1188	23.443	2.19528	0.432811	chr18	9463624	9466414	FSCN2	fascin-2_[Source:RefSeq_peptide;Acc:NP_001171209]	5	DOWN
ENSGALT00000011407	20.4752	48.8395	1.25417	0.436138	chr4	8906960	8943986	HDX	highly_divergent_homeobox	5	DOWN
NM_001031537	17.5142	48.5322	1.47042	0.437603	chr4	44160740	44167209	AREGB	amphiregulin_B	5	DOWN
ENSGALT00000003471	17.4039	43.9556	1.33663	0.438162	-	-	-	-	-	5	DOWN
ENSGALT00000031814	22.5227	51.7699	1.20073	0.438717	chr5	5047727	5066881	IMMP1L	IMP1_inner_mitochondrial_membrane_peptidase-like_(S._cerevisiae)	5	DOWN
ENSGALT00000016035	2.04752	16.6054	3.01971	0.442335	chr3	21572515	21591500	RD3	retinal_degeneration_3	5	DOWN
ENSGALT00000022283	2.04752	16.6054	3.01971	0.442335	chr2	91882133	91893812	FAM69C	Uncharacterized_protein_[Source:UniProtKB/TrEMBL;Acc:F1P454]	5	DOWN
ENSGALT00000016630	16.3802	42.002	1.35851	0.443656	chr8	19947563	20004993	-	-	5	DOWN
ENSGALT00000025690	21.499	49.8163	1.21235	0.444471	chr1	104632520	104642675	IL10RB	interleukin_10_receptor,_beta	5	DOWN
ENSGALT00000004678	21.499	49.8163	1.21235	0.444471	chr9	9405231	9525036	DNER	delta/notch-like_EGF_repeat_containing	5	DOWN
ENSGALT00000044745	9.21384	30.2805	1.71651	0.444595	-	-	-	-	-	5	DOWN
ENSGALT00000022607	18.4277	44.9324	1.28588	0.447496	chr3	54859270	54941536	AHI1	Abelson_helper_integration_site_1_[Source:HGNC_Symbol;Acc:21575]	5	DOWN
ENSGALT00000045290	8.19008	28.3269	1.79022	0.448345	chr3	2811631	2857436	ACYP2	acylphosphatase_2,_muscle_type	5	DOWN
ENSGALT00000004489	3.07128	18.559	2.59521	0.451519	chr13	8254941	8280226	NEURL1B	neuralized_homolog_1B_(Drosophila)	5	DOWN
ENSGALT00000003775	3.07128	18.559	2.59521	0.451519	chr19	4870121	4880847	PSPH	Phosphoserine_phosphatase	5	DOWN
ENSGALT00000043890	3.07128	18.559	2.59521	0.451519	chr2	129106055	129128935	BAALC	brain_and_acute_leukemia,_cytoplasmic	5	DOWN
ENSGALT00000038252	7.16632	26.3734	1.87978	0.451602	chr4	38987653	39011877	IRF2	interferon_regulatory_factor_2	5	DOWN
ENSGALT00000001616	1.02376	13.6751	3.7396	0.453232	chr17	9429010	9444852	NR5A1	nuclear_receptor_subfamily_5,_group_A,_member_1	5	DOWN
ENSGALT00000028106	1.02376	13.6751	3.7396	0.453232	chr18	9754644	9756687	NPTX1	neuronal_pentraxin_I	5	DOWN
ENSGALT00000014340	1.02376	13.6751	3.7396	0.453232	chr1	22086125	22106344	IQUB	IQ_motif_and_ubiquitin_domain_containing	5	DOWN
ENSGALT00000024095	1.02376	13.6751	3.7396	0.453232	chr2	102106446	102127328	ABHD3	abhydrolase_domain_containing_3	5	DOWN
ENSGALT00000022305	1.02376	13.6751	3.7396	0.453232	chr12	3226269	3228218	OAS*A	59_kDa_2'-5'-oligoadenylate_synthase-like_protein_[Source:RefSeq_peptide;Acc:NP_990372]	5	DOWN
ENSGALT00000029324	1.02376	13.6751	3.7396	0.453232	chr12	3226272	3228218	OAS*A	59_kDa_2'-5'-oligoadenylate_synthase-like_protein_[Source:RefSeq_peptide;Acc:NP_990372]	5	DOWN
ENSGALT00000010143	1.02376	13.6751	3.7396	0.453232	chr20	9964303	9966357	-	-	5	DOWN
ENSGALT00000012623	6.14256	24.4198	1.99114	0.454115	chr14	12661874	12680810	SRL	sarcalumenin	5	DOWN
ENSGALT00000021171	6.14256	24.4198	1.99114	0.454115	chr1	60139732	60238559	IQSEC3	IQ_motif_and_Sec7_domain_3	5	DOWN
ENSGALT00000009875	14.3326	38.0948	1.41029	0.454913	chr13	13728685	13739566	PKD2L2	polycystic_kidney_disease_2-like_2	5	DOWN
ENSGALT00000008525	5.1188	22.4662	2.13388	0.455486	chr11	12288496	12432361	CDH8	Cadherin_8,_type_2	5	DOWN
ENSGALT00000036239	5.1188	22.4662	2.13388	0.455486	chr12	11545870	11554936	LAMB2	laminin,_beta_2_(laminin_S)	5	DOWN
ENSGALT00000037966	5.1188	22.4662	2.13388	0.455486	chr3	31632108	31793597	CRIM1	cysteine_rich_transmembrane_BMP_regulator_1_(chordin-like)	5	DOWN
ENSGALT00000040881	19.4514	45.9092	1.2389	0.456429	chr13	9672036	9674820	SNCB	synuclein,_beta	5	DOWN
ENSGALT00000023984	19.4514	45.9092	1.2389	0.456429	chr3	60658436	60671812	SMPD1	sphingomyelin_phosphodiesterase_1,_acid_lysosomal_[Source:HGNC_Symbol;Acc:11120]	5	DOWN
ENSGALT00000019634	10.2376	31.2573	1.61032	0.458988	chr5	5617014	5623941	PRRG4	proline_rich_Gla_(G-carboxyglutamic_acid)_4_(transmembrane)	5	DOWN
ENSGALT00000046173	16.3802	41.0252	1.32456	0.459377	chr12	15468611	15557117	MITF	microphthalmia-associated_transcription_factor	5	DOWN
ENSGALT00000036866	16.3802	41.0252	1.32456	0.459377	chr1	90670108	90704903	CRYBG3	beta-gamma_crystallin_domain_containing_3_[Source:HGNC_Symbol;Acc:34427]	5	DOWN
ENSGALT00000037643	18.4277	43.9556	1.25417	0.462643	chr5	42358814	42375595	PTPN21	protein_tyrosine_phosphatase,_non-receptor_type_21	5	DOWN
ENSGALT00000038586	12.2851	34.1877	1.47656	0.466456	chrZ	23069195	23143219	PDE8B	phosphodiesterase_8B	5	DOWN
ENSGALT00000043640	12.2851	34.1877	1.47656	0.466456	chr11	10526663	10597453	WTIP	Wilms_tumor_1_interacting_protein	5	DOWN
ENSGALT00000002392	8.19008	27.3501	1.7396	0.468535	chr27	3971093	4005910	MLLT6	Myeloid/lymphoid_or_mixed-lineage_leukemia_(trithorax_homolog,_Drosophila);_translocated_to,_6	5	DOWN
ENSGALT00000009693	8.19008	27.3501	1.7396	0.468535	chr10	10702910	10708346	BTBD1	BTB_(POZ)_domain_containing_1	5	DOWN
ENSGALT00000004742	2.04752	15.6287	2.93224	0.471708	chr18	5124019	5286048	CA10	carbonic_anhydrase_X	5	DOWN
ENSGALT00000037249	2.04752	15.6287	2.93224	0.471708	chr3	68268128	68295765	BVES	blood_vessel_epicardial_substance	5	DOWN
ENSGALT00000040301	2.04752	15.6287	2.93224	0.471708	chr4	2156281	2160713	CMC4	C-x(9)-C_motif_containing_4_homolog_(S._cerevisiae)_[Source:HGNC_Symbol;Acc:35428]	5	DOWN
ENSGALT00000016998	7.16632	25.3966	1.82533	0.472805	chr8	20699729	20715718	MKNK1	MAP_kinase_interacting_serine/threonine_kinase_1	5	DOWN
ENSGALT00000043760	16.3802	40.0484	1.2898	0.47556	chr17	4877409	4880796	AK1	adenylate_kinase_1	5	DOWN
ENSGALT00000018991	16.3802	40.0484	1.2898	0.47556	chr3	44860099	44870618	PNLDC1	poly(A)-specific_ribonuclease_(PARN)-like_domain_containing_1	5	DOWN
ENSGALT00000045827	3.07128	17.5822	2.51721	0.478597	chr26	3087399	3091783	-	-	5	DOWN
ENSGALT00000043396	5.1188	21.4894	2.06975	0.479158	-	-	-	ILVBL	ilvB_(bacterial_acetolactate_synthase)-like_[Source:HGNC_Symbol;Acc:6041]	5	DOWN
NM_001030875	1.03024	15.5303	3.91403	0.479673	chr21	2679191	2699394	LOC419429/protein tyrosine phosphatase non receptor type 11-like	similar_to_Hypothetical_protein_MGC63553	5	DOWN
ENSGALT00000045474	4.09504	19.5358	2.25417	0.480257	chr3	108988859	109073478	RUNX2	runt-related_transcription_factor_2	5	DOWN
ENSGALT00000014468	17.4039	41.0252	1.2371	0.485113	chr7	13606938	13647794	PPP1R1C	protein_phosphatase_1,_regulatory_(inhibitor)_subunit_1C	5	DOWN
ENSGALT00000001635	1.02376	12.6983	3.63268	0.487664	chr26	2547058	2552305	C1orf116	chromosome_1_open_reading_frame_116	5	DOWN
ENSGALT00000007715	1.02376	12.6983	3.63268	0.487664	chr12	3713195	4003351	ATP2B2	ATPase,_Ca++_transporting,_plasma_membrane_2	5	DOWN
ENSGALT00000043910	1.02376	12.6983	3.63268	0.487664	chr5	22966048	22966158	gga-mir-6706	gga-mir-6706_[Source:miRBase;Acc:MI0022528]	5	DOWN
ENSGALT00000006094	1.02376	12.6983	3.63268	0.487664	chr23	5463428	5466913	-	-	5	DOWN
ENSGALT00000045975	8.19008	26.3734	1.68713	0.489484	chr23	4404011	4404779	GJB3	gap_junction_protein,_beta_3,_31kDa_[Source:HGNC_Symbol;Acc:4285]	5	DOWN
ENSGALT00000020546	11.2614	31.2573	1.47281	0.491232	chrZ	39827330	39835470	IDNK	Uncharacterized_protein_[Source:UniProtKB/TrEMBL;Acc:F1P2F5]	5	DOWN
ENSGALT00000000887	7.16632	24.4198	1.76874	0.494837	chr27	2938400	2963524	MAPT	microtubule-associated_protein_tau	5	DOWN
ENSGALT00000019496	7.16632	24.4198	1.76874	0.494837	chr2	44950767	44955201	SLC25A38	solute_carrier_family_25,_member_38	5	DOWN
ENSGALT00000004498	10.2376	29.3037	1.51721	0.497884	chrZ	9316119	9506598	PDZD2	PDZ_domain_containing_2	5	DOWN
ENSGALT00000012996	6.14256	22.4662	1.87084	0.499733	chr4	13284674	13339214	CAPN6	calpain_6	5	DOWN
ENSGALT00000043043	6.14256	22.4662	1.87084	0.499733	chr18	780799	806399	MYOCD	myocardin	5	DOWN
ENSGALT00000024385	6.14256	22.4662	1.87084	0.499733	chrZ	34660214	34687106	PTAR1	protein_prenyltransferase_alpha_subunit_repeat_containing_1	5	DOWN
ENSGALT00000026748	6.14256	22.4662	1.87084	0.499733	chr3	104737931	104748006	C3H8ORF80	Uncharacterized_protein_[Source:UniProtKB/TrEMBL;Acc:E1BTB4]	5	DOWN
ENSGALT00000026770	17.4039	40.0484	1.20233	0.501662	chr1	122466940	122507987	EGFL6	EGF-like-domain,_multiple_6	5	DOWN
ENSGALT00000037207	17.4039	40.0484	1.20233	0.501662	chr4	81642831	81659465	MSANTD1	Myb/SANT-like_DNA-binding_domain_containing_1_[Source:HGNC_Symbol;Acc:33741]	5	DOWN
ENSGALT00000002289	2.04752	14.6519	2.83913	0.502732	chr9	574114	597244	NGEF	neuronal_guanine_nucleotide_exchange_factor	5	DOWN
ENSGALT00000041305	2.04752	14.6519	2.83913	0.502732	chr9	574114	597171	NGEF	neuronal_guanine_nucleotide_exchange_factor	5	DOWN
ENSGALT00000038919	5.1188	20.5126	2.00263	0.503854	chr17	8212309	8238531	KCNT1	potassium_channel,_subfamily_T,_member_1	5	DOWN
ENSGALT00000037630	5.1188	20.5126	2.00263	0.503854	chrZ	64953819	64959631	ALDOB	aldolase_B,_fructose-bisphosphate	5	DOWN
NM_001001464	8.24196	29.1193	1.82092	0.504181	chr1	71411620	71442947	PPARA	peroxisome_proliferator-activated_receptor_alpha	5	DOWN
ENSGALT00000013057	9.21384	27.3501	1.56967	0.504562	chr7	9709226	9719149	COQ10B	coenzyme_Q10_homolog_B_(S._cerevisiae)	5	DOWN
ENSGALT00000022933	9.21384	27.3501	1.56967	0.504562	chr1	68715573	68928375	SCUBE1	signal_peptide,_CUB_domain,_EGF-like_1	5	DOWN
ENSGALT00000024741	4.09504	18.559	2.18017	0.506641	chr1	84708524	84710604	TXNL4B	thioredoxin-like_4B	5	DOWN
ENSGALT00000045227	3.07128	16.6054	2.43474	0.507034	chr25	2097072	2097182	gga-mir-6620	gga-mir-6620_[Source:miRBase;Acc:MI0022439]	5	DOWN
ENSGALT00000043173	3.07128	16.6054	2.43474	0.507034	chr1	72202217	72208823	-	-	5	DOWN
ENSGALT00000007572	3.07128	16.6054	2.43474	0.507034	chr20	6832940	6843420	-	-	5	DOWN
ENSGALT00000022395	11.2614	30.2805	1.42701	0.510807	chr2	97193844	97220472	MPPE1	Metallophosphoesterase_1	5	DOWN
ENSGALT00000042916	15.3564	36.1413	1.23481	0.51729	chr3	4348121	4348248	gga-mir-6542	gga-mir-6542_[Source:miRBase;Acc:MI0022359]	5	DOWN
ENSGALT00000012448	10.2376	28.3269	1.4683	0.518336	chr12	15538058	15554870	MITF	microphthalmia-associated_transcription_factor	5	DOWN
ENSGALT00000039494	10.2376	28.3269	1.4683	0.518336	-	-	-	ZNF512B	zinc_finger_protein_512B	5	DOWN
ENSGALT00000019721	10.2376	28.3269	1.4683	0.518336	chr7	27739667	27755563	-	-	5	DOWN
NM_205383	17.5142	42.7083	1.286	0.520136	chr23	436672	454976	SDC3	syndecan_3	5	DOWN
ENSGALT00000027842	12.2851	31.2573	1.34728	0.522801	chr1	185280117	185382364	SLC36A4	solute_carrier_family_36_(proton/amino_acid_symporter),_member_4	5	DOWN
ENSGALT00000016119	12.2851	31.2573	1.34728	0.522801	chr3	22432859	22443680	KIAA0240	KIAA0240	5	DOWN
ENSGALT00000011595	6.14256	21.4894	1.80671	0.523936	chr14	8935373	8936082	SOCS1	suppressor_of_cytokine_signaling_1	5	DOWN
ENSGALT00000045204	6.14256	21.4894	1.80671	0.523936	chr1	69422919	69502176	KIAA1644	Uncharacterized_protein_[Source:UniProtKB/TrEMBL;Acc:E1C879]	5	DOWN
ENSGALT00000001603	1.02376	11.7215	3.51721	0.524326	chr19	785548	804855	ELN	elastin_(supravalvular_aortic_stenosis,_Williams-Beuren_syndrome)	5	DOWN
ENSGALT00000012349	1.02376	11.7215	3.51721	0.524326	chr10	17666848	17858077	MEGF11	multiple_EGF-like-domains_11	5	DOWN
ENSGALT00000005279	1.02376	11.7215	3.51721	0.524326	chr10	3366147	3406151	DAPK2	death-associated_protein_kinase_2_[Source:HGNC_Symbol;Acc:2675]	5	DOWN
ENSGALT00000022147	14.3326	34.1877	1.25417	0.525501	chr4	62557972	62607677	MTUS1	mitochondrial_tumor_suppressor_1	5	DOWN
ENSGALT00000021150	11.2614	29.3037	1.3797	0.531022	chr2	76273169	76295468	FAM105A	uncharacterized_protein_LOC769855_[Source:RefSeq_peptide;Acc:NP_001073214]	5	DOWN
ENSGALT00000022382	8.19008	24.4198	1.5761	0.533719	chr2	95484911	95554453	CDH7	cadherin_7,_type_2	5	DOWN
ENSGALT00000019141	13.3089	32.2341	1.2762	0.533995	chr2	43197022	43212426	CP49	CP49_protein;_Uncharacterized_protein_[Source:UniProtKB/TrEMBL;Acc:Q90976]	5	DOWN
ENSGALT00000043995	4.09504	17.5822	2.10217	0.534218	chr5	71478	72531	-	-	5	DOWN
ENSGALT00000016586	2.04752	13.6751	2.7396	0.53545	chr8	19816838	19823208	-	-	5	DOWN
ENSGALT00000040125	2.04752	13.6751	2.7396	0.53545	chr9	14606242	14610177	-	-	5	DOWN
ENSGALT00000007647	3.07128	15.6287	2.34728	0.536862	chr5	665317	702105	PLCB2	phospholipase_C,_beta_2	5	DOWN
ENSGALT00000000839	3.07128	15.6287	2.34728	0.536862	chr26	353422	358969	PTPN7	protein_tyrosine_phosphatase,_non-receptor_type_7	5	DOWN
ENSGALT00000037222	3.07128	15.6287	2.34728	0.536862	chr1	75534045	75551354	A2ML1	Uncharacterized_protein_[Source:UniProtKB/TrEMBL;Acc:F1NTK2]	5	DOWN
ENSGALT00000010575	10.2376	27.3501	1.41767	0.539476	chr9	3879407	3881194	PROCR	protein_C_receptor,_endothelial_(EPCR)	5	DOWN
NM_205041	1.03024	13.589	3.72138	0.539717	chr12	3226206	3228218	OASL	2'-5'-oligoadenylate_synthetase-like	5	DOWN
ENSGALT00000040455	7.16632	22.4662	1.64845	0.541462	chr23	5625794	5630542	IL28RA	interleukin_28_receptor,_alpha_(interferon,_lambda_receptor)	5	DOWN
ENSGALT00000023905	7.16632	22.4662	1.64845	0.541462	chrZ	21917436	21925919	MTX3	metaxin_3	5	DOWN
ENSGALT00000045652	7.16632	22.4662	1.64845	0.541462	-	-	-	-	-	5	DOWN
ENSGALT00000024125	12.2851	30.2805	1.30148	0.542786	chrZ	23704322	23726114	ANKDD1B	ankyrin_repeat_and_death_domain_containing_1B	5	DOWN
ENSGALT00000025487	9.21384	25.3966	1.46276	0.548155	chr1	103312406	103316521	RWDD2B	RWD_domain_containing_2B	5	DOWN
ENSGALT00000009577	6.14256	20.5126	1.7396	0.549096	chr6	17424713	17438731	ANXA8	annexin_A8	5	DOWN
ENSGALT00000038513	6.14256	20.5126	1.7396	0.549096	chr18	9067762	9073622	SOX9	SRY_(sex_determining_region_Y)-box_9	5	DOWN
ENSGALT00000008885	6.14256	20.5126	1.7396	0.549096	chr9	4866583	4881692	ITM2C	integral_membrane_protein_2C	5	DOWN
ENSGALT00000014487	11.2614	28.3269	1.33079	0.551889	chr9	16861501	16902461	USP13	ubiquitin_specific_peptidase_13_(isopeptidase_T-3)	5	DOWN
ENSGALT00000026126	11.2614	28.3269	1.33079	0.551889	chr2	142122785	142207755	ZFAT	zinc_finger_and_AT_hook_domain_containing_[Source:HGNC_Symbol;Acc:19899]	5	DOWN
ENSGALT00000002760	11.2614	28.3269	1.33079	0.551889	chr11	1064190	1067062	-	-	5	DOWN
ENSGALT00000044910	5.1188	18.559	1.85824	0.556409	chr1	187498827	187522674	RAB38	RAB38,_member_RAS_oncogene_family	5	DOWN
ENSGALT00000023429	5.1188	18.559	1.85824	0.556409	chr4	76407831	76456077	CPEB2	cytoplasmic_polyadenylation_element_binding_protein_2	5	DOWN
ENSGALT00000031464	5.1188	18.559	1.85824	0.556409	chr27	2671506	2696162	KCNH6	potassium_voltage-gated_channel,_subfamily_H_(eag-related),_member_6	5	DOWN
ENSGALT00000020702	5.1188	18.559	1.85824	0.556409	chr2	60467065	60470062	NHLRC1	NHL_repeat_containing_1	5	DOWN
ENSGALT00000001528	5.1188	18.559	1.85824	0.556409	chr19	565351	590836	HSF5	heat_shock_transcription_factor_family_member_5	5	DOWN
ENSGALT00000035184	5.1188	18.559	1.85824	0.556409	chr19	565351	590836	HSF5	heat_shock_transcription_factor_family_member_5	5	DOWN
ENSGALT00000026341	5.1188	18.559	1.85824	0.556409	chr3	88000719	88049786	ANGIOPOIETIN-2	angiopoietin-2_[Source:RefSeq_peptide;Acc:NP_990148]	5	DOWN
ENSGALT00000039829	4.09504	16.6054	2.01971	0.563011	chr21	4223960	4228341	TMEM82	transmembrane_protein_82	5	DOWN
ENSGALT00000008834	4.09504	16.6054	2.01971	0.563011	chr19	8643565	8661541	HNF1B	HNF1_homeobox_B	5	DOWN
ENSGALT00000037951	1.02376	10.7447	3.39168	0.563278	chr4	48685348	48688644	HOPX	HOP_homeobox	5	DOWN
ENSGALT00000019108	1.02376	10.7447	3.39168	0.563278	chr5	51737894	51742948	-	-	5	DOWN
[truncated: 6,675 more rows]
