# Supplementary material for: A gene regulatory network for neural induction
Source: eLife. 2023 Mar 3;12:e73189. doi: 10.7554/eLife.73189 (PMC10038663; doi:10.7554/eLife.73189)
Supplement: Figure 1—source data 3. [file elife-73189-fig1-data3.xlsx]

## Sheet: Suppl Table S8
Supplementary Table S8. NanoString codeset
CODESET DETAILS
	Transcription factors upregulated at 5, 9 or 12h by a FC of 1.2 log2 and with an RNA-Seq induced base mean of at least 45, based on Galgal4 analysis
	Transcription factors downregulated at 5, 9 or 12h by a FC of 1.2 log2 and with an RNA-Seq uninduced base mean of at least 200, based on Galgal4 analysis
Probe No.	Customer Identifier	Accession	Target Sequence	Tm_Capture Probe	Tm_Reporter Probe	Exceptions	Gene	Part No. (Capture;Reporter Probes)	NanoString ID		AFF1	ASXL2
1	AATF	NM_001030724.1	TAAAGTGATTGACAGGTTTGAGGATGAGACTGCAGACGACGTTTTACCTGTTGGTAATATACGGAAAAAGGCTTCGGTCTCCCTCTTAGAAGCTGACCAA	80	82	N/A	AATF	346105;246105	NM_001030724.1:115		ATF3	ASXL3
2	ACTB	NM_205518.1	CATTGTCCACCGCAAATGCTTCTAAACCGGACTGTTACCAACACCCACACCCCTGTGATGAAACAAAACCCATAAATGCGCATAAAACAAGACGAGATTG	84	82	N/A	ACTB	326240;226240	NM_205518.1:1171		BACH1	ATF7IP
3	AFF1	XM_004941100.1	GAACCTCAGGCCACTCTTTTGGAGCTTTCCCCGTTGCTGCCGTCTTTGTCTTCTCCAGTGGCACCCCTGTCACCTCTACATTCCATCCAGCACACTAATT	80	83	N/A	AFF1	300002304;200002304	XM_004941100.1:810		BHLHE40 (BHLHB2)	BAZ1A
4	APOA1	ENSGALT00000011524.1	CCCCGGTGGCTGAGGAGGCGCGGGATCGTCTGCGTGGGCACGTGGAGGAGCTGCGCAAGAACCTGGCGCCATACAGCGATGAGCTGCGGCAGAAGCTGAG	90	90	N/A	APOA1	300002438;200002438	ENSGALT00000011524.1:544		BTBD6	BCL11A
5	ARIH2	NM_001199221.1	TTCAGGAAAGAGTTATGAACAACTTGGGAACGTGGATAGACTGGCAATACCTACAAAATGCTGCAAAACTACTCGCAAAGTGTCGTTACACTCTGCAGTA	84	81	N/A	ARIH2	300002372;200002372	NM_001199221.1:1330		CDX2	BLIMP1 (PRDM1)
6	ASXL2	NM_001031096.1	CGGTCCTTCAGCCTTCCCAAGTGAACGTCGCGCACTCAGGTTTCCAGCTAGAAAACAGCTCCACCAGCCAGAGATTTGTGCTGGGTTTTATGGGCAGAAG	83	85	N/A	ASXL2	300002208;200002208	NM_001031096.1:3340		CEBPB	BMI1
7	ASXL3	XM_419185.4	GCCTTACAAATGCACCAGTGCAAAGCAAGCTAGTATCTTCCTTCCAGCAGCACACAAAGAAAGCACTTAAGCAGGCTTTAAGACAGCAGCAGAAAAGAAG	83	86	N/A	ASXL3	300002340;200002340	XM_419185.4:430		CSRNP1	BRACHYURY (T)
8	ATF3	XM_419429.2	TCCAAAACAAACGTCAGTCCCACAGGATGTCTTCTACTTTGGATACGGTGACAGTGTCCGAAAGGCCGATGGAAACATCGATCATGAAAACGGAGTTTTC	80	81	N/A	ATF3	346423;246423	XM_419429.2:145		CSRP1	BRD8
9	ATF7IP	NM_001012813.1	AACTACACATCCTGTTGCACAAACCACAAGGACTTCTTTGCCCACAGTGGGTACTTCAGGACTTCATAACTCTACCAGCAGTCGAGGTCCCATACATATG	85	81	N/A	ATF7IP	300002200;200002200	NM_001012813.1:2270		CSRP2	BTBD11
10	AXIN1	NM_204944.2	GGCGAGGATGCAGATATCTCTTCTGGTCCTTCAGTCATTAGCCACAAGATGCCTTCCGCCCAACCTTTTCATCACTTCGCCCCTCGCTACTCTGAGATGG	82	83	N/A	AXIN1	300002252;200002252	NM_204944.2:1520		DLX5	CBFA2T2 (MTGR1)
11	AXIN2	NM_204491.1	GCAGTGTTTGAAGAGATCTGGGAAGACGAAACAATTCTGCCCATGTACGAAGGAAGGATTCTTGGGAAAGTAGAAAGGATCGATTGATGGCATCTGTGTT	83	81	N/A	AXIN2	346115;246115	NM_204491.1:2435		ELF1	CBX1
12	BACH1	XM_004938377.1	AGGTGTGTGTGATGCAACATATGATCAAGTACAAGAACTACATCCAGTTCCTGTAAGAACATTGGAAAAAACTTCACTTGTGGAACAGTGTGGACAGAGT	81	82	N/A	BACH1	300002296;200002296	XM_004938377.1:2480		ESRRG	CBX2
13	BAZ1A	XM_004941760.1	AGACTAGATTTCAGAAGCAAAAAGAAGATATGCAGGCCATGGCTTTTGAAAAAGCTAGATTGAAACGAGAGAAGGCAAATGCTTTAGAAGCCAGAAAAAG	81	83	N/A	BAZ1A	300002307;200002307	XM_004941760.1:550		ETS2	CBY1
14	BCL11A	NM_001031031.1	AGCCCAGCCCTCCGCCACCGGTAACTGAGAGGTAAATTCCTATTCTCATTTGGTTTAAAACACAAAATCTGAGTGCCTTGGATCTCTTGCGAGCGATGCT	85	81	N/A	BCL11A	346107;246107	NM_001031031.1:3395		GATA2	CCND1
15	BCL2	NM_205339.1	TGTTCGATTTCTCCTGGATCTCTCTGAAGACCATCCTGAGCCTGGTTCTGGTGGGAGCTTGCATCACTCTTGGCGCTTATCTTGGACATAAGTAGAGTCA	81	82	N/A	BCL2	310037;210037	NM_205339.1:665		GRHL1	CDCA7
16	BERT	EU118175.1	AGCAGAAAGAGCCCGTTCTACAATGATGAACGCTGACATGGACGCTGTTGAGGCTGAGAATCAGGTGGAATTAGAAGAGAAAACACGGCTTATTAATCAA	86	82	N/A	BERT	300002190;200002190	EU118175.1:80		GRHL2	CDR2
17	BHLHE40 (BHLHB2)	NM_001277144.1	ACCGGTTCTGAGGACCGGTGTCCAGCACAACTCCGCTATGGGTTCCCATTTCACCTTCCTGTTGCCCCAGCTGTTGAGATGCACTATGCTTGATTGCAGA	87	83	N/A	BHLHE40	300002374;200002374	NM_001277144.1:2290		GRHL3	CDR2L
18	BMI1	NM_001007988.1	AAGTACTGCCCGATCTGCGACGTCCAAGTGCACAAAACCCGGCCGCTGCTCAACATCAGGTCAGATAAAACTCTCCAGGATATCGTGTACAAGCTCGTAC	88	81	N/A	BMI1	300002196;200002196	NM_001007988.1:150		Hand1	CDX1
19	BMP4	NM_205237.2	GGCCCGCCGCAGCCCCAAGCACCAGCGTTCCCGCAAGAACAAAAAAAACTGCCGCCGCCACGCTCTCTATGTGGATTTCAGCGACGTGGGTTGGAACGAT	82	82	N/A	BMP4	310034;210034	NM_205237.2:985		HIC2	CITED2
20	BRD8	NM_001006148.1	ATTGCAGTGTCCTATACAGGAGAAGAGCTGGACTTTGATACTGTTGGAAATATTATAGCCATCATTGAAGACAAGGTAGACGACAACCCTGAAGTCCTGG	82	83	N/A	BRD8	346218;246218	NM_001006148.1:1455		HIF2A (EPAS1)	CITED3 (CITED4)
21	BTBD11	XM_004937809.1	AATATGGAAAACATAGCTCCTGTATGCTTCTGAGCAACGGGCCTACCAGAGCGTCCAGTGCATCGGTGTTGTACCCAAGCTCTGAACACGAAAGTGTGGT	87	85	N/A	BTBD11	300002294;200002294	XM_004937809.1:2240		HIPK2	CNOT1
22	BTBD6	XM_004936422.1	TTGCCCTAAATCCCGCGTACTGCCCCTTAATGATGTTAGGGCCTGTCTGCTAATGCAGCTACAGCGTAGTTAACGGGTGGTAACACCGCTGGTTGCCTGT	85	86	N/A	BTBD6	300002291;200002291	XM_004936422.1:1990		HOXA1	CRIP2
23	ASTERIX	XM_003643512.2	CGGGCTGATGCTCAAGCTGAAGTGGTGCGCCTGGATCGCCGTCTACTGCTCCTTCATCAGCTTCGCCAACTCGCGCAGCTCCGAGGACACAAAGCAGATG	88	87	N/A	C19ORF56	300002285;200002285	XM_003643512.2:160		Id2	CRTC1
24	C4ORF21	XM_426326.4	GAGCATACATTCTGAGGCTTTTCCAGTGAAGGCTGTCCAGGTGTCCACTGTAGATGCATTCCAGGGAGCCGAGAAGGAGATCGTTGTTCTGTCGTGTGTA	84	82	N/A	C4H4ORF21	300002363;200002363	XM_426326.4:6150		ID3	DACH1
25	CALFACILITIN	GQ504719.1	TGCCCCGACCCGCAGCCGTGAGGAGCCGACCCGGACGGGTTTGGCGTTGGAGGAACCTCCTCGTTTCCTTCGCACATTCCGTGCTCGCCGGGCTGTGGGC	88	87	N/A	CALFACILITIN	300002192;200002192	GQ504719.1:150		IRF7 (IRF3)	DNMT3A
26	CANT1	NM_001031581.1	TCACGGCTTCTCCTCCTTCAAGTTCATCCCGGACACGGACGATCAGATCATCGTGGCATTGAAATCGGAGGAGGACGATGGCAAGATCGCCAGTTACATC	83	85	N/A	CANT1	300002212;200002212	NM_001031581.1:1180		KLF5	DNMT3B
27	CBFA2T2 (MTGR1)	NM_001011689.1	AGCCGACTCCTCGGAGCTGCTCATTGAGGTCAACGGGAACGGCAAGAGGCACAGCCCTGACAGAAGGGATGATAACAGCTTCGAGAGGGAGCCGCTGCCG	88	88	N/A	CBFA2T2	300002197;200002197	NM_001011689.1:670		KLF6	E2F2
28	CBX1	NM_204332.1	AGAGATGGCTGGAGAAGATGCCCTTTGAAGAGACCAGTATGGTTTCTGTGCCCTGCAGCTGCTCCGCTGCTTTATGCAGCTTCATGCTGTGTACAGATTC	85	84	N/A	CBX1	300002235;200002235	NM_204332.1:790		LMO7	E2F3
29	CBX2	XM_423911.4	GCAGCACTGGAGGGGATCAGAAATCGGGGTTCACCACCGGAGCCCAAATGCTGCACAATGGCAGCAAGACGCCCACGAGCTCCTCTGTGCCCGGGGGGCA	88	89	N/A	CBX2	300002355;200002355	XM_423911.4:1240		MBNL2	EHMT1
30	CBY1	NM_001278149.1	TTCCACGGGACGAGATGCTTGCAGTATTGCATCGGTACTGTGTAAGGGTGCCTCTGCATCCCTGTATGTCACACTGTGCACTGATAACCAACGCTCGTGT	84	85	N/A	CBY1	300002378;200002378	NM_001278149.1:830		MEF2D	ENC1
31	CCND1	NM_205381.1	CGATTTCATTGAACATTTCCTCACTAAAATGCCTCTGGCAGAGGACACCAAACAGATCATCCGTAAACATGCTCAGACTTTTGTGGCTCTGTGCGCTACA	79	81	N/A	CCND1	310038;210038	NM_205381.1:710		MKL1	EOMES
32	CDCA7	XM_423365.4	TGTGCTGTTGAGAATCTCCTGACCCCTGCTTCCATAGTGTGACTAGACGTGCAATCTTGGGTGGCGTGTGCCCTATTCTCCAGGTTCATCTCTTGAAGAA	85	81	N/A	CDCA7	300002353;200002353	XM_423365.4:3100		MSX1	ERNI
33	CDR2	NM_001030642.1	TCCTGAGAATGAAGTTAGTGAATCTAGCTGAACTTGCTTTGGCAGGGAGGTGGAGAGCTAGCATAGCAGCTTGAGCCGTGCTTGGTTAAGTTAATGCCAT	84	84	N/A	CDR2	300002204;200002204	NM_001030642.1:2020		MYC (C-MYC)	ETV1 (ER81)
34	CDR2L	XM_426243.4	CGCTTTAAATCTCTCCCAGTATTTCAGCCCAGGTGACTTGCTGTGCCTGGCAGAAACTTGATGACCAGGGCTTTCCCATAAGCTAGATAAGAAGTGCTGT	81	84	N/A	CDR2L	300002362;200002362	XM_426243.4:2390		NANOG	ETV4 (PEA3)
35	CDX1	NM_204676.2	CCCCTTAATCCTGCTGACTCCTGGGATCTCTACTGGCCCAGCTACCTTACAGCCCAGTTTTGGATGCCCCAAAGGGCGTGCTGGGACACAGGAGGGTTTG	88	88	N/A	CDX1	300002241;200002241	NM_204676.2:1840		NCOA2	ETV5 (ERM)
36	CDX2	NM_204311.1	TTTATTTTTTACCCTGGCCTTTGTTAGGTGTAAGGGGAGCGTGGCACTCCCCAGTGAATCTCAGGGATCGGCGCGAAGGTCTGAGCGATGCTGTTGGGCT	78	86	N/A	CDX2	346184;246184	NM_204311.1:1289		NFKB2	EYA2
37	CDX4	NM_204614.1	GGCTCAGTTCAGAGTGACTCTGGTTCACTCAGCCCTAATGAAATAACAAGTTCCCTGTTCCCACCACCACACGGAATAAATGTATTACAGTCTGCTGACA	83	82	N/A	CDX4	346302;246302	NM_204614.1:750		PDLIM1	EZH2
38	CEBPB	NM_205253.2	AGATTTCCTTTCCGATCTCTTCGCCGAGGACTATAAAGGCAGCGGCGGCGGCAAGAAGCCCGACTACACCTACATCAGCCTCACCCGGCACGGCCACCCG	83	88	N/A	CEBPB	300002263;200002263	NM_205253.2:510		PDLIM5	FEZF2
39	CHORDIN	NM_204980.1	ACATCCAGCGCGGTGGCCAAGGCTCGCTTCACCCTGCTGCGCTCCTACCTGCTCTTCTCCATCAGCTACGAGCGGCTGGGCCGGCCGAGCCGTGTGCGTT	88	89	N/A	CHRD	300002253;200002253	NM_204980.1:540		PITX2	FOXA2 (HNF3B)
40	CHURCHILL	NM_204709.1	TGATTGCTCGCCATGAGTACACCTTCAGCGTGGTGGACGACTACCAGGAGTACACCATGCTGTGCCTGCTGTGCGGCCGCGCCGAGGACTCGGTCAGCAT	88	89	N/A	CHURC1	300002242;200002242	NM_204709.1:200		PPARGC1A	FOXI2-actually FOXI3
41	CITED2	NM_206844.1	CGCGGCGATGCTGCCGCCCAATGTCATAGACACTGACTTCATCGACGAGGAGGTCCTCATGTCCTTAGTCATCGAAATGGGGCTGGATCGCATCAAGGAG	85	85	N/A	CITED2	346096;246096	NM_206844.1:722		RASSF7	FOXP1
42	CITED3 (CITED4)	NM_204718.2	CCCTCACCGGCTCTGACCTTGAACGTTATGGACACTGATCTCATAGATGAGGAGGTTTTGACATCCCTTGTCCTGGAACTGGGGTTGGACCGGATTCAGG	85	85	N/A	CITED4	300002243;200002243	NM_204718.2:500		RREB1	FUBP1
43	CNOT1	NM_001277133.1	CTGCCTCTTTGGTGGGATAATAGAGAAAGGACTGGTTACTTACATGGCTTTGGGCCTGGCCCTTCGCTACGTTCTTGAAGCCTTACGAAAGCCTTTTGCG	82	83	N/A	CNOT1	300002229;200002229	NM_001277133.1:3020		SAMD4A	GATA3
44	CNOT2	NM_001012808.1	AGATATGCTGGCATCACCGTCAACATCAGGTCAGCTGTCTCAGTTTGGGGCAAGTTTATACGGGCAACAAAGTGCACTAGGCCTTCCAATGAGGGGAATG	84	85	N/A	CNOT2	300002199;200002199	NM_001012808.1:190		SCML2	GATAD2B
45	CNTNAP5	NM_001048079.1	CCTGGCAAAAAGGCGCAAACCTCAGATCTATACTGGGAATGTGACCTTTTCCTGCTCAGAACCACAAATTGTTCCCATCACGTTTGTCAGCTCCAGTAGA	84	80	N/A	CNTNAP5	346112;246112	NM_001048079.1:1025		SMARCA2	GBX2
46	COPS5	NM_001039311.1	CAGGTTGGTCGTCTAGAAAATGCAATTGGCTGGTACCACAGTCACCCCGGCTACGGCTGCTGGCTCTCCGGGATCGATGTCAGTACTCAGATGCTTAATC	85	85	N/A	COPS5	300002215;200002215	NM_001039311.1:520		TADA3	GLI2
47	CREBL2	NM_001278110.1	TTCGCTCCTCCCCACGTGAAACTCTTGCTTGTGGTACTCCTAAACCTGCATGGAGTGGGGCTTCTGGGGTAATAGGTGTTTGTGTTAAGTGGAGCCTTGT	84	83	N/A	CREBL2	300002231;200002231	NM_001278110.1:600		TBX3	GLI3
48	CRIP2	XM_422218.4	GCCCTGCTACGCAACGCTCTTTGGCCCCAAAGGGGTGAACATCGGCGGTGCCGGGTCGTACATCTATGAGAAGCCGCAGATTGAGGGGCAGAGCGCACCG	87	88	N/A	CRIP2	300002349;200002349	XM_422218.4:260		TFAP2A	HDX
49	CRTC1	XM_003642883.2	TTGGCCCGACGCGTTGTGTTCTGTGTTGGGATGTCGCTCCCTCTGCCATTTCCTGGGCGGTTTGTTGGGCAGCTCTGAACTTCTCTCTGTATTTCAGAGT	82	80	N/A	CRTC1	395280;295280	XM_003642883.2:6679		TFAP2C	HES1
50	CRYM	XM_424610.4	AAGCTGTTGATGCCGAGATCTGCAGAAGTGCTGTGTATTTTGGGAGCTGGTGTCCAAGCACGCAGCCACTACGAGATCTTCACGGAGCTGTTCCCATTTA	84	83	N/A	CRYM	300002356;200002356	XM_424610.4:440		TFCP2L1	HESX1
51	CSDC2	XM_422970.4	TGGTCATGAGCATTGTCTGTGATGAGAAAATATAAACCACAGCCAAATCTTGCCTTGTAAAATGTTGCTGTCTCGACTCTGCTGTGAATAGCACCCAGCA	81	84	N/A	CSDC2	300002352;200002352	XM_422970.4:1510		TRIM3	HEY1
52	CSRNP1	XM_418530.4	GGTTTCCCGCAAGCTGGAGATCAGGGCTCCTGTTTCTTGGAGTCTCTCATTGGTTTGTCCGAATCCGTCCCCGAAACTCCAGCCCCTTTCACAGACAATC	83	82	N/A	CSRNP1	351614;251614	XM_418530.4:1654		VGLL1	HIF1A
53	CSRP1	NM_205248.1	CCGCAGCGTTCCGCTCCACGTCGCCCGTCCCGCCGGGATGAGCCGCGCTGCGCCGCGTCACCGAGCAAAGGAATAAACATCAAAGCTGACCCAAAGCATT	88	86	N/A	CSRP1	300002262;200002262	NM_205248.1:870		ZBTB46	HIVEP3
54	CSRP2	NM_205208.1	CCACAAACCCAAATACTTCAAAATTCGCTCAGAAGTTTGGAGGTGCAGAGAAATGTTCTCGGTGTGGGGATTCTGTTTATGCGGCGGAGAAAGTCATAGG	80	80	N/A	CSRP2	346337;246337	NM_205208.1:330		ZFHX3	HMGA1
55	CXCL14	NM_204712.2	TCCAGATTCCATGAGCATCTGTTGCACTTCAGATTTCACACCTGCCTGCATTGTACCGAGGCTGGGGAAAAAACAACTCTTGTTTGGCATTTTAAAGAGG	81	79	N/A	CXCL14	346119;246119	NM_204712.2:570		ZMYND11	HMGA2
56	CYP26A1	NM_001001129.1	CCGGACCGCTTCATGTCTCCGTCTCCGGAGGACTCCTCTAGGTTCAGTTTCATTCCTTTCGGTGGGGGCTTGAGGAGCTGCGTAGGCAAAGAGTTTGCAA	82	84	N/A	CYP26A1	394883;294883	NM_001001129.1:1230		ZNF185	HOXB1
57	CYP26C1	XM_421678.2	ATTTCATAATAAACAGTGCCAAGGAGCACGGCAAAGAGTTCACCATGCAGGAGCTGAAGGAGTCAGCCATCGAGCTCATATTTGCTGCTTTTTTCACCAC	82	79	N/A	CYP26C1	394892;294892	XM_421678.2:934			ING5
58	DAD1	NM_001007473.1	AGAGAAGTGTTGTTTTCCAGCAGTACCTGCTGCTTTGGTGAGGAAGGGGAGAAGCAGAAGTCAAAGATTATTCCCACAGACTGTCCTATGGAGTGGTCTG	84	83	N/A	DAD1	300002195;200002195	NM_001007473.1:440			IRF8
59	DBX1	NM_001199474.1	GGCTATAAATTGAAGAGGTGATGTCCCACCTACATGTCCATGTGCTTCTCCAGGGCAGGTTCCCTATCACATTGCCACAAGCCTTCCTGCTCCAGGTATT	82	85	N/A	DBX1	300002373;200002373	NM_001199474.1:1080			IRX1
60	DLX3	NM_204804.1	AAGTGTTCCAGGACACGCGCCCCTATGTACCCACCTCTATATCCTCTCCTCTCCCAGCTCATCTCAGGAACAACGGGACTGCAAAGGGTTGAACTCGTGA	84	85	N/A	DLX3	310048;210048	NM_204804.1:1021			IRX2
61	DLX5	NM_204159.1	CCGCTCCCTGGACTCCTGTGTTTTACTGTTAAGGAAGAATAACGAAAGGAATGCGGATGGGGGATTTTTAAAGGGAAACGAAACAAACAAACGACGACGA	82	82	N/A	DLX5	310018;210018	NM_204159.1:940			IVNS1ABP
62	DMAP1	XM_422417.4	TCTGTCAACAGCAGAGGTGACGCATTAATCTGGACTTGAGAGTAATGTCCTATTCAGTTGTGACAACATGGAGTCATAAGGAAGCGTTCCACCGAGACAG	84	82	N/A	DMAP1	300002350;200002350	XM_422417.4:2330			KAT2B
63	DMBX1	XM_001234035.2	GAGTCCTGGTGTGGACGGCAAGGCTTTGAACTGCAAGAGAGCGAGCCCAAAATCAGAGTCTCCCATCAGCGCGACCGTGACTCCTTCATCTAGCAGTGGC	88	87	N/A	DMBX1	300002273;200002273	XM_001234035.2:690			KDM4A
64	DMRT3	XM_429193.3	AATGCTATCATGATGGAAGCTTAGATCCTCGGATGTGCTCTACAAACACTTCCAAGTTGAGGAGAGTAAAGCAGAACTTGCTACAGTCACAACAATAAGG	83	84	N/A	DMRT3	300002366;200002366	XM_429193.3:2370			KIAA2018
65	DNMT3B	NM_001024828.1	GAATTTGGAATCGGGGAGCTCGTCTGGGGGAAGATCAAGGGTTTCTCCTGGTGGCCAGCGATCGTTGTTTCCTACAGAGCCACGTCCAAGCGCCAGGCGG	85	85	N/A	DNMT3B	346103;246103	NM_001024828.1:825			LDB2
66	E2F2	FJ770467.1	TGAACCGCGCCGCCGAGCTCCTGGAGGTGCAGAAACGCCGCATCTACGACATCACCAACGTCCTGGAGGGCATCCAGCTCATCCGCAAGAAGTCCAAGAA	88	89	N/A	E2F2	300002191;200002191	FJ770467.1:100			LHX5
67	E2F3	XM_418915.4	AGGAAAGTAAAAGTTGTGTGAGCATGAAGATTTGTGAGACAAAGGGGCACTTTTGAGGGGGGAAGAGAAAATGAAGACTAATGCAGACCATCTCTTTATG	84	81	N/A	E2F3	300002339;200002339	XM_418915.4:2740			LIN28A
68	EBF1	NM_204752.1	TTCCTTTAGTGGTCAACTAGCTGTCAACGTATCCGAAGCCTCACAGGCCACCAGTCAGGGTTTTACTCGCAACTCAAGCAGCGTGTCACCTCACGGCTAT	83	84	N/A	EBF1	300002245;200002245	NM_204752.1:1310			LIN28B
69	ECE1	NM_204717.1	CCAAGGAGCTGGACAAAGTCTTTAACGATTATGATGCTGTGTCTGACCTCTACTTTGAGAATGTCATGCAGTTTTACAACTTCTCGGCCAGGGTCACGGC	82	80	N/A	ECE1	346120;246120	NM_204717.1:1520			LMO1
70	EHF	NM_001277584.1	AGCTGCTTTATAGCAACCTTCAGCACCTAAAATGGAACGGTCAGTGTGGAAGTGACATGTACCAATCTCATAATGTCGTTGTGAAGACAGAGCAAACAGA	84	81	N/A	EHF	300002375;200002375	NM_001277584.1:390			LMX1B
71	EHMT1	NM_001012532.1	GAGCCAGCAGGACTCTAGTACTAAATTAAATAGGATAGCAGAAAATGGCATTTCTGAACGAGATGGTGAGACTGGGAAGCAAAACCATATGAAAGCTAAT	85	84	N/A	EHMT1	300002198;200002198	NM_001012532.1:290			MAFA (L-MAF)
72	ELF1	NM_001006269.1	GAGTGCTAAAAGAAGACGACGGTGACAAATTAGATGATCCTGAGCAGTCCGAGCAGAGATTCCAGCAGCAGCCGTTTGTGATGGTAGTATCCAGTTCAAA	86	81	N/A	ELF1	300002194;200002194	NM_001006269.1:2000			MAML2
73	ELF3	XM_419257.4	ATTTCTCTTGTTGGATTTGTACCTCCAACTGGAGAGGCAGTGACTGTGGGACTTTGTTTCAAAGCCTGGACAAGAGCAATGGAGAAGAGAAGTGTGAGTG	81	84	N/A	ELF3	300002341;200002341	XM_419257.4:1410			MBD3
74	ELF5	XM_004941542.1	AAACAAAGTTATCCAACAAGGACTTCCCTGTGCGTGATAAAGCATGCATGAGGGCAGGTGGCATCAGCAGCCAAGAATGTCACAGTCATGGTAGAACAAA	81	88	N/A	ELF5	300002306;200002306	XM_004941542.1:180			MDFI
75	ENC1	XM_424790.4	CTTAGCAACTTCCAGAGTATCAGTAAAAGTGAAGACTTCCTCCAGCTGCCCAAAGACATGGTAGTGCAGCTCCTTTCCAGTGAAGAATTAGAAACCGAAG	82	82	N/A	ENC1	300002357;200002357	XM_424790.4:700			MEIS1
76	ENS1-1 (ERNI)	NM_001080873.1	CCCAAGACTTATTGGAACCAAAAAGGTTTCATCCCCAGTAAAAACGGGGACACGATGCATTGATCATAAACGCAATGGACTTTGGACTCTGGGCTGGACA	82	85	N/A	ENS-1	300002384;200002384	NM_001080873.1:2741			MEIS2
77	ENS3-1	NM_204632.1	CCTCTGATGCGGTCAGAAGGGTAAATGATCGCTGGGGAATTAATGGCTGTCCTCGATTCAACGCTTTCTACCCCAAGGCCCCGCCACTTCTCCCAATTAC	86	83	N/A	ENS-3	300002383;200002383	NM_204632.1:2570			MGA
78	LZTR1	ENSGALT00000000524.1	GCAGAGCATCATCAGTGCTGGGCGTTGCGTCCTTGCAGTTTGCCAGTTCACATTCGAAGATGTGTATGTCTAAAACCAAGAGAGCTGTGCTTCGGAACGG	83	81	N/A	ENSGALG00000000384	346097;246097	ENSGALT00000000524.1:325			MID1
79	ETV4 (PEA3)	ENSGALT00000031379.1	GGTTCCAGACAGCGATGAGCAATTTGTGCCTGACTTCCATTCAGAAAACCCTTTTCATAGTCCTCCTGCAAAGATTAAAAAGGAACCACAGAGTCCCTCC	82	80	N/A	ENSGALG00000001188	394894;294894	ENSGALT00000031379.1:308			MLLT3
80	FOXI1	ENSGALT00000003284.1	ACTGTGAAAAGATGTTTGACAATGGCAACTTTCGCAGGAAGAGGAAAAGGAAGTCTGATATTGGGGCTAGTTCTGCCCATCTGACATCTGAGAAATCCGA	83	83	N/A	ENSGALG00000002105	346042;246042	ENSGALT00000003284.1:604			MLXIP
81	RRN3	ENSGALT00000034401.1	AAATCAGAAAGAACTCTGGATGCTTACTTGTGGAATTTAGAATTGTCTGTTTATTATATCTCACTTCAAACAGTGCTGCTAGACCTGATTCTAGAAATAC	76	75	N/A	ENSGALG00000002862	346036;246036	ENSGALT00000034401.1:666			MTA1
82	NSD1	ENSGALT00000004699.1	ACTGAAACGCAGTGAATTTTGTAACCTTAGGATCCCCTACAGAAGGCAGAAGTCAGGGTCTGGAATTGCAAGTGCCACCTTGGAGGATCGAATAATTGAT	83	83	N/A	ENSGALG00000002971	346091;246091	ENSGALT00000004699.1:5054			Myb
83	LMX1A	ENSGALT00000005411.1	AGATGGGACAGATACGGTGTAAAGGGAATCCTTCCCCTGCCAAGCAAATATTTAGAAAGGTGTCCCCACAAATCTGTACCCCATCCCCAGGTAAAAGTGA	86	83	N/A	ENSGALG00000003424	346093;246093	ENSGALT00000005411.1:424			MYCL1
84	TOX3	ENSGALT00000005929.1	CTCCCCTCCATTACTATATCCAGAAATCTCATGGAGCAAGATGGCGTCATCCACAGCAATGGATTGCACATGGATCAGAGTCACACCCAAGTTTCGCAGT	82	84	N/A	ENSGALG00000003737	346044;246044	ENSGALT00000005929.1:351			MYCN (N-MYC)
85	ZNF423	ENSGALT00000006188.1	ATTACTCACTGTGGCCCAAATGCTACCCCTCAAGACGGTAACAATGCTTTCTTCTGTAACCAGTGCTCAATGGGCTTTCTGACCGAAGCAACCTTGACTG	84	83	N/A	ENSGALG00000003891	346045;246045	ENSGALT00000006188.1:1161			MYSM1
86	DNMT3A	ENSGALT00000006362.1	CAGCTGGGAGGGAGACATTGGGGATGTGGCACTGCTGAGGGCATGGCACTCGGTGCACGTTTAGCTGGGGAGAGTTGGGGGCCAGCATCTACGGGGTGGC	89	88	N/A	ENSGALG00000003993	346032;246032	ENSGALT00000006362.1:460			NAB1
87	E2F8	ENSGALT00000006406.1	AAACCAGAAAGCATTAACCATAGCTCAGAAAACATGACCTTACAAGAAGAAAAGGTAAGAAACAATACATTGCAACTGCCTCCCCAGAAAGGCTGGCAGC	83	84	N/A	ENSGALG00000004023	346076;246076	ENSGALT00000006406.1:2199			Nkx6-2
88	BCL7A	ENSGALT00000006984.1	TCCAGCACCAGAACAGAATTTGGCAACACAAGCAGATGGCACTGAAGTAAAGTCTGATGAAACTCAGTCAGAAGCAAAGGAGCAACCTGGTTCAGAAGAT	85	85	N/A	ENSGALG00000004379	346046;246046	ENSGALT00000006984.1:472			NR2C2
89	PAX3	ENSGALT00000040854.1	ATCGGCGGCAGCAAACCCAAGAAAATGAAAATGGATACAGAGTGTGCTGAAACTTTGCTAGAACAGCAGCAAGCTGAGCTTAAACGTTTTCTAACATATG	85	77	N/A	ENSGALG00000005246	346084;246084	ENSGALT00000040854.1:312			NRIP1
90	SETD2	ENSGALT00000008839.1	GTTTGCCAAGCAGGGGAAAATGCCCTGTTACTTCGACCTCATTGAGGAAAATGTGTACTTGACAGAAAGGAAGAAGAGCAAATCCCACCGGGATATTAAG	83	84	N/A	ENSGALG00000005508	346047;246047	ENSGALT00000008839.1:2918			NSD1
91	ETV5 (ERM)	ENSGALT00000009265.1	CTCAGGTCCCCGACGATGAACAATTTGTCCCAGATTTCCAGTCTGACAACCTGGTCCTGCATGCCCCACCTCCAGCCAAGATCAAGCGGGAGCTGCACAG	81	86	N/A	ENSGALG00000005768	346037;246037	ENSGALT00000009265.1:441			OTX2
92	KREMEN1	ENSGALT00000009327.1	TGGACCATACAAGTCCCAGGAGCTTCTCAAATCCTCTTCAGCTTTGTCCTTTTTGAAATCAAAGATGCCACAGACATGGTGGAGTTGCTGGACGGCTATA	82	83	N/A	ENSGALG00000005808	346048;246048	ENSGALT00000009327.1:709			PAX6
93	HOMER2	ENSGALT00000009667.1	TCAAGAGAAAATTGAGACCTCAAGCAATCATTCACAGGAGTCCGGGCGTGAAACACCATCTTCCACCCGAGCATCGAGTGTGAACGGGACAGATGATGAG	84	86	N/A	ENSGALG00000006008	346049;246049	ENSGALT00000009667.1:371			PBX4
94	ID1	ENSGALT00000010025.1	TGCTGAGAGCATTCCCTGTATTGTATATTACAATGATGCCGGAGAATATTGTTCTACAATAGCTGGAGTTTTGTTATTAAACAAGCCCTGATTACCAGGC	77	76	N/A	ENSGALG00000006210	394893;294893	ENSGALT00000010025.1:493			PDCD4
95	ZIC3	ENSGALT00000010497.1	GCCCTTCAAGTGCGAGTTTGAGGGCTGCGACCGGCGCTTCGCCAACAGCAGCGACAGGAAGAAACACATGCACGTCCACACCTCGGACAAGCCCTACATC	85	85	N/A	ENSGALG00000006497	346038;246038	ENSGALT00000010497.1:257			PDLIM4
96	RYBP	ENSGALT00000012632.1	CCTTGGACATCAACCTCTTACTGATGCAACCAGGATAATTTCTGCTTGCCGTGGGCATCTGGCCACCAAGGAATTTCTCACCCTAATGATTACTCTTGAC	81	83	N/A	ENSGALG00000007790	346051;246051	ENSGALT00000012632.1:791			PHF15
97	ZNF217	ENSGALT00000012648.1	AAATAAAGGTAGCCAGACTGAAACTACAGGGAAGTCAAAAGTAAATAAAAACAGCAGTTATACAGGGAATAGTAACTTATACCGACACAAATTGAAACAT	82	79	N/A	ENSGALG00000007799	346078;246078	ENSGALT00000012648.1:1010			PHTF1
98	SALL4	ENSGALT00000012710.1	TCGGCTGTTTCTTCTGTCATAGATTCCTCAAAGAGGGTGAAAGGGAAAGCAAATCGAGCGCAGAGGAGCCCGTTCTTCAATCACAAGTGTAAATTCTGCG	82	80	N/A	ENSGALG00000007834	346079;246079	ENSGALT00000012710.1:696			PRDM14
99	SMAD6	ENSGALT00000012764.1	AAAGCTTGAGGACGTCCCGTTTGGGCCTGGAGGAGCTCTCTCTGCATCTACTTTCTGGGGGGCTGTTGAGCCTTTACAAGCAGAGCACCTTGCAGCCTGC	86	85	N/A	ENSGALG00000007865	346092;246092	ENSGALT00000012764.1:277			PTTG1
100	DNAJC1	ENSGALT00000012853.1	CTACAGGCGGGTGAGAAAAATGAGCAATGCTGAGCTGGCATTACTCTTGTTCATTATACTCACAGTGGGTCATTATGCTGTGGTTTGGTCAATCTACCTG	86	77	N/A	ENSGALG00000007914	346052;246052	ENSGALT00000012853.1:212			RFX2
101	MLLT10	ENSGALT00000012873.1	AACACTGACTTCAAATCCCAGCCCTTCTCATCAAGTACATGCCTTTCCTGTGCAAGCAGTAATTGCATTAGCACCTAGCACGGATTCCTTGAACAGCAGT	80	83	N/A	ENSGALG00000007928	346080;246080	ENSGALT00000012873.1:2377			RFX3
102	TBX3	ENSGALT00000010560.1	AAATCGGGAAGGAGAATGTTTCCTCCGTTTAAAGTGAGATGCACTGGACTGGATAAAAAGGCCAAGTACATTTTATTGATGGATATTGTGGCGGCTGACG	82	79	N/A	ENSGALG00000008250	346050;246050	ENSGALT00000010560.1:372			RNF14
103	MYNN	ENSGALT00000015328.1	ACCCTCGGAGATGTCTTTACCGCTTCCTCTTCCCATTGGTACCGAAGACCATCAGATGCTTCTTCCAGTGGCAGGTAGTCAGTCCCCATCATCAGAAACA	83	82	N/A	ENSGALG00000009409	346054;246054	ENSGALT00000015328.1:1693			RUNX1T1
104	DBX2	ENSGALT00000038776.1	ACTCCAAAGAAAAAGAAGTGCTTTCAAACAGGTGCCTCCAAGAAGGTCTTCAGGAAAACTACCTCTCACAGTCTGCCATGAATTTTGCCTCCCCATGTCC	83	83	N/A	ENSGALG00000009604	346075;246075	ENSGALT00000038776.1:499			SALL1
105	YEATS4 (GAS41)	ENSGALT00000016197.1	ACCGCCGTACGAGATCACCGAAACGGGCTGGGGCGAATTTGAAATCATCATCAAGATATTTTTCATTGATCCAAACGAGCGACCCGTAACCCTGTATCAC	85	76	N/A	ENSGALG00000009964	346056;246056	ENSGALT00000016197.1:248			SALL3
106	NPAS3	ENSGALT00000016244.1	TGGACTTGTTGAATAAGGGTCAGTGTGTAACAAAGTATTACCGCTGGATGCAGAAGAATGGAGGTTATATCTGGATACAGTCCAGTGCAACCATAGCTGT	80	84	N/A	ENSGALG00000009998	346057;246057	ENSGALT00000016244.1:592			SETD1B
107	STOX2	ENSGALT00000017319.1	TCCCGCAGCGAGAAGGACTACCGGCTGCACAAACACTTCCCGCCGGCTTTCATCTCGCAGGCGTCGCGGGGCTACATGACATCAGGTGATGTATCACCAA	85	85	N/A	ENSGALG00000010646	346081;246081	ENSGALT00000017319.1:144			SETD2
108	SP4	ENSGALT00000017736.1	AGTCCCTCTAGCAGTAACAATGGAAGTGCATCTCCTACAAAAACCAAATCGGGCAATTCTTCTGCAACAACCCCTGGACAATTTCAGGTCATTCAAGTAC	84	81	N/A	ENSGALG00000010905	346058;246058	ENSGALT00000017736.1:372			SIN3A
109	PHF10	ENSGALT00000018250.1	TCTTGCCTACAGAGAGAACAAAGGTTAGTCCTTATCCAGTGGCTCTCATACCCGGCCAGTTCCAGGAGTACTACAAAAGATATTCTCCAGATGAACTTCG	82	82	N/A	ENSGALG00000011192	346100;246100	ENSGALT00000018250.1:460			SIX1
110	EZH2	ENSGALT00000020263.1	AGCTCAGAATGCCAAAACAGGTTTCCTGGATGTCGTTGTAAAGCACAATGCAACACTAAGCAGTGTCCATGTTACCTAGCTGTTCGTGAATGTGATCCTG	81	80	N/A	ENSGALG00000012405	346059;246059	ENSGALT00000020263.1:1786			SIX3
111	ZEB2 (SIP1/ZFHX1B)	ENSGALT00000020339.1	AGCATGAGCGTTACCTGTGTAAAATGAATGAAGAGATCAAGGCAGTCCTTCAGCCTCACGAGAACATGGTTCCCAACAAACCTGGAGTGTTTGATAAGCA	82	84	N/A	ENSGALG00000012440	346060;246060	ENSGALT00000020339.1:1720			SMAD2
112	HMGXB4	ENSGALT00000020504.1	CCGGCTGGAGTGAGGCCGAGGCCCGCTCGGAACTTTTCCTGTAGATGGGAACAGGGGAAGGAGCCCAGACGTGGCAACATATTCTCAGGCTCCTGCAGGA	86	87	N/A	ENSGALG00000012556	346035;246035	ENSGALT00000020504.1:119			SMARCD1
113	PTCH1	ENSGALT00000020601.1	AGGGTATTTCTCCAGTGACTTCAGGGAGTCTTATCTTTGCCCACAGACCTTCCTAGCGCAGCAAATGGGGATAACTAGAATGCACAAGTTTCCATGCCTT	81	84	N/A	ENSGALG00000012620	394880;294880	ENSGALT00000020601.1:6141			SNAI1
114	ADNP2	ENSGALT00000020622.1	CAGTCACCAGCTAGTGCACCCTCTCCTCCAGTGGTTTTAACAACTCAGAGTATATCATTACAAGCTTCCCCACCTGATGCTGAAACAAGTCAGACCCTTG	84	82	N/A	ENSGALG00000012634	346061;246061	ENSGALT00000020622.1:375			SOX1-1
115	TRIM24	ENSGALT00000020916.1	TTTATCACTGTCAGTTGTTGAAAGGGGAAGAGCCATGACTGCTTTGACCTGGAGGTCTGTGGACATTTACTCGACTTTCTACCCCTTGTCTGAAACACAA	81	81	N/A	ENSGALG00000012823	346062;246062	ENSGALT00000020916.1:2823			SOX11
116	RX1	ENSGALT00000021906.1	CTCGAGGAGTGATGGCTGCTGTCCCAAAAGCTCCCGGAGGACACGGAGTGCAGAGCCCACCTGCAGCACGCGGGGATGGGTTTGGGGGCACCAAGATGTT	88	89	N/A	ENSGALG00000013431	346033;246033	ENSGALT00000021906.1:7			SOX13
117	MYB	ENSGALT00000022624.1	CTGAAGTAAAAAAGCATTACTACACACGCTAGTCTGTGCAAAGGGGAAAGACTGATCCAGTTCGTGAATGCTCAGACATCCATTCCTCTTGAAATACTCT	84	78	N/A	ENSGALG00000013956	394881;294881	ENSGALT00000022624.1:2353			SOX2-1
118	CDKN1B	ENSGALT00000023032.1	CCGGTAAACCACGAAGAGTTAAACAGGGACTTGAAGAAGCACCGCAAGGAAATGGAAGAGGCATGCCAGAGGAAGTGGAATTTCGATTTCCAGAACCACA	86	85	N/A	ENSGALG00000014241	346039;246039	ENSGALT00000023032.1:102			SOX3-1
119	ENSGALG00000014558	ENSGALG00000014558.1	AGCAGCACTGAACTCATTTGTCACCAGCGCGTCCACAAAGGAGAGAGACCCTACAAGTGCCCTGAGTGTGAAAAGAGCTTCAAATGCAGTTCTGCCTTGA	88	83	N/A	ENSGALG00000014558	300002390;200002390	ENSGALG00000014558.1:540			SOX4
120	MEF2D	ENSGALT00000023483.1	CAGGTGACCTTCACCAAGCGTAAGTTCGGCTTGATGAAGAAAGCCTACGAGCTGAGCGTGTTGTGCGACTGCGAGATCGCCCTGATCATTTTCAACCACT	84	83	N/A	ENSGALG00000014559	346064;246064	ENSGALT00000023483.1:0			SOX9
121	HEY2	ENSGALT00000023951.1	ATAGAGAAAAGGCGCCGGGATCGTATAAATAACAGTTTATCTGAGCTGAGGCGGCTGGTGCCAACTGCTTTTGAAAAACAAGGATCTGCCAAATTAGAAA	81	83	N/A	ENSGALG00000014837	346065;246065	ENSGALT00000023951.1:165			SP4
122	BLIMP1 (PRDM1)	ENSGALT00000024824.1	GGAAAAGACTTCTTCCAAACCAACATTTCACCGGTTACTCCAGAAAAGGACTTGGATGATTTGCGTAAGAACTATAGCCCAGAGAGGTGTTTCTTCCCTC	80	78	N/A	ENSGALG00000015388	394882;294882	ENSGALT00000024824.1:1620			STOX1
123	ZNF462	ENSGALT00000024915.1	CCGAACCGTGAAAGGAGTGCTCATTCATTATCAAAAGAAGCATCGTGACTTCAAAGCTAATGCAGATGTGATTAGACAGCATACAGCCACCATTAGAAGC	80	84	N/A	ENSGALG00000015451	346066;246066	ENSGALT00000024915.1:3473			STOX2
124	EYA1	ENSGALT00000025181.1	AGCTCAGCAGCACTTTGAAACCCCAGAGCCTCCTTCTGCCCATGGACGGTACGCCTGTGTCTTGTGTCAGCATTGGACTACAGAACTTTGTGATTTCAAC	85	78	N/A	ENSGALG00000015622	346086;246086	ENSGALT00000025181.1:1810			TBL1XR1
125	WHSC1	ENSGALT00000025327.1	AGTGAATCGTGAGTGTTCTGTCTACTTGGGCAAAGCACAACTTTCTGCCACTCTACAGGAAGGTGTCATGCAAAAATATAACGGCCACGACGCTCTTCCA	81	84	N/A	ENSGALG00000015705	346067;246067	ENSGALT00000025327.1:116			TCF1 (TCF7)
126	HEY1	ENSGALT00000025381.1	TCATGCTTTGGCTATGGACTACCGGAGTCTCGGGTTCCGAGAGTGCCTGGCTGAAGTGGCTCGATACTTGAGCATTATAGAGGGCCTGGATGCCTCTGAC	86	86	N/A	ENSGALG00000015738	346068;246068	ENSGALT00000025381.1:258			TCF12
127	ERNI/ENS1	ENSGALT00000025383.1	CTTTGGACTCTGGGCTGGAGAAAGGGTATTCCACGAGATTTGATGAATGGATTACCCACAGTCAGATTAGAGAAATTAGTTAACTGCTGGCCAGAACAAA	83	80	N/A	ENSGALG00000015740	346030;246030	ENSGALT00000025383.1:1356			TCF7L1 (TCF3)
128	ZHX2	ENSGALT00000026439.1	TAACAAATTTCCTTACCCCACGCAAGCAGAATTGTCGTGGTTGACAGCAGCATCAAAGCATCCTGAAGAACAGATCCGAATCTGGTTTGCTACGCAACGT	80	81	N/A	ENSGALG00000016390	346069;246069	ENSGALT00000026439.1:845			TCF7L2 (TCF4)
129	ID2	ENSGALT00000036925.1	AAGCAGACTTTGCCTTTTCTTCCAAAGGTGGAGCGTGAGTACCAGAAGGACCCGGCGTTCAGTTCTTTAGGGGAGTCCGGGGTCAGAAATTGCCTTTCTG	83	80	N/A	ENSGALG00000016403	394896;294896	ENSGALT00000036925.1:869			TGIF1
130	PNOC	ENSGALT00000026828.1	AGGCACAGGCAAAATTAAACCCTGCTCCTGTCCACCCAAGCAGCCTCCAACCTCTCTCTGACGGACCCCAAAGCGCTTCAGACTCGCACGCGTCCCGAAA	84	86	N/A	ENSGALG00000016620	346087;246087	ENSGALT00000026828.1:592			TOX2
131	DACH1	ENSGALT00000027373.1	AGCTGACCGCAGTGGGGGCAGAACAGATGCTGAAAGGACAATACAAGGTTCACTAGATGCCTATGCCTAGCTCCCAATCCGGTTTCCCAAGATCCCCTCA	84	85	N/A	ENSGALG00000016933	346082;246082	ENSGALT00000027373.1:1790			TOX3
132	SIX4	ENSGALT00000028076.1	AGCGTGGGGGCTTCGCAGCCGGTAACTTTAAATTCACCCAAAACCACTTCAAGTGCTGTGAGCAACGGGGTGTCCATCACTGACATCATGTCGTCTTCTT	84	82	N/A	ENSGALG00000017389	346101;246101	ENSGALT00000028076.1:735			TRIM24
133	FOXM1	ENSGALT00000029983.1	GAAATGTTTCACCATACTGAAGTCACCATCTAAGGGTGTTTCTGACGCATTAGTTATAAAGAGGTGTGAGAGGCGGGAAATGAGCAGATCCAGAAGGAAA	78	85	N/A	ENSGALG00000019005	346070;246070	ENSGALT00000029983.1:149			TRIM9
134	LRP11	ENSGALT00000031799.1	GCTGTACTACCTTTGGCCTTAGGTTTGGCCATCACTGCTTTACTGCTGCTTATGGTTGCTTGCAGACTGCGTTTAGTGAGACAGAAGCTTAAAAAAGCTC	82	81	N/A	ENSGALG00000019987	346072;246072	ENSGALT00000031799.1:750			VGLL2
135	CHD7	ENSGALT00000036735.1	AGTCACCACAAAACACACCGCAAAAAGTGCCTGTCCTTCAGCATTCTCCATCGGAACCTTTTTTAGAGAAACCAGTGCCGGATATGACTCAGGTTAGTGG	84	80	N/A	ENSGALG00000022822	346073;246073	ENSGALT00000036735.1:610			WHSC1
136	FOXI2	ENSGALT00000037124.1	CCCCAGAGCTGGACCCATCGCCTTCTGCCAGGGACCATCCCAAAAGCTCCTCTCCCTCCGGTATCATTTCATCCACCCCGAGCTGCCTCAGCACCTTCTT	90	83	N/A	ENSGALG00000022935	300002439;200002439	ENSGALT00000037124.1:649			YEATS4 (GAS41)
137	FOXI3	ENSGALT00000037124.1	GAGCTGGACCCATCGCCTTCTGCCAGGGACCATCCCAAAAGCTCCTCTCCCTCCGGTATCATTTCATCCACCCCGAGCTGCCTCAGCACCTTCTTCAGCG	86	82	N/A	ENSGALG00000022935	346040;246040	ENSGALT00000037124.1:654			ZBTB1
138	DLX6	ENSGALT00000038006.1	CAGCAGAAAACGACGGTGATCGAAAACGGCGAGATCAGATTCAACGGGAAAGGGAAAAAGATCCGGAAGCCCCGAACCATTTACTCCAGCCTTCAGCTGC	86	85	N/A	ENSGALG00000023195	346074;246074	ENSGALT00000038006.1:472			ZEB2 (SIP1/ZFHX1B)
139	EN2	ENSGALT00000038721.1	CTCCCAGGCCGGCTCCAACGCCGGGAACCAACCCATGCTTTGGCCCGCTTGGGTGTACTGCACGCGGTACTCGGACCGACCGTCTTCAGGTCCCCGCTCC	87	87	N/A	ENSGALG00000023430	394897;294897	ENSGALT00000038721.1:464			ZHX2
140	FZB7	ENSGALT00000031605.1	TTCTGAGCAGAAAGGCGTAAGCATGGGATCGGTTTTTATGGGCAAAGTAACAAAAAGAAGTCGTTGAGGTTCACCCTTGGATGTGAGGAGCTCGCAGAAA	80	83	N/A	ENSGALG00000023536	394895;294895	ENSGALT00000031605.1:2724			ZIC1
141	TBX2	ENSGALT00000039210.1	GCGCCACGCACCAACCCGAGCTCCTGCACCCCATCCCCTGCCCCTTTTTGGGTCTGTTTTCACGATGATGCCCAACCCGAACAGCTGCTGACACAGAACA	85	85	N/A	ENSGALG00000023577	346041;246041	ENSGALT00000039210.1:824			ZIC2
142	TGIF2	ENSGALT00000030938.1	CTGCTCCCTGACATGCTGCGCAAGGATGGGAAGGACCCCAACCAGTTCACCATCTCTCGCCGAGGGGGCAAGGCTGGCGACGTGACCCTGCCGCGGGGGG	88	89	N/A	ENSGALG00000024081	346034;246034	ENSGALT00000030938.1:36			ZIC3
143	POGZ	ENSGALT00000041392.1	CACGCTCACCATCAGGAGCACAGTGCCGCAGTCCCAGTCACAACAGCAAATGAGCATCGCGAGCTTTGTGACCGTAAAGAGACCCGGAGTGACTGGTGAG	86	85	N/A	ENSGALG00000024479	346085;246085	ENSGALT00000041392.1:378			ZMYM3
144	HAND1	ENSGALT00000046051.1	TCCACGGGCAGAGCCCCGCGTACGGCCCCGCCGAGTTCGGCTCGGGAGGAGCGGGCAGGCTGGAAGCGCTCAGCGGTCGTTTGGGGAGAAGGAAAGGGGT	88	88	N/A	ENSGALG00000026787	394899;294899	ENSGALT00000046051.1:166			ZNF131
145	KLF4	ENSGALT00000042652.1	TGCCTTAGAGATTCAGTATTTACAGCACAAGGACTGCTTTCCGCAAGAAGGGGAGAACCCAGTTTAAGCACTACAGAGAATCATGGTGAAGTCTTCCAAA	80	83	N/A	ENSGALG00000026928	394898;294898	ENSGALT00000042652.1:1840			ZNF277
146	EOMES	XM_426003.4	TCAGCTGCCCTGTATCAAACTGGAAGTGATGTAACCTGCCCACTCTTCTTGCCTATAGTTTCAGCCATTTTAAACGGATCAACCCTAGAGCACTGGCACA	85	81	N/A	EOMES	300002361;200002361	XM_426003.4:2850			ZNF367
147	HIF2A (EPAS1)	NM_204807.1	CAGTGCAACTCTCAGACTGACTTCAATGAACTGGACCTTGAAACCTTAGCTCCTTACATTCCTATGGATGGAGAAGATTTCCAGCTCAGCCCTATCTGCC	85	83	N/A	EPAS1	300002248;200002248	NM_204807.1:1550			ZNF385C
148	ESRRG	NM_001007081.1	TCACAGACCAAATGTGAATATATGCTGAACTCGATGCCCAAAAGACTGTGTTTGGTGTGTGGTGACATTGCATCAGGGTACCACTACGGAGTGGCTTCTT	84	82	N/A	ESRRG	346223;246223	NM_001007081.1:300			ZNF414
149	ETS2	NM_205312.1	GTCCTGGAACAGCCAGTCGTCGCTAGTGGATTTACAGCGTGTGCCATCCTATGAGAGTTTTGAAGATGACTGTAGCCAGTCCTTGTGTATGAGCAAACCT	85	81	N/A	ETS2	300002264;200002264	NM_205312.1:1170			ZNF423
150	ETV1 (ER81)	NM_204917.1	CAAACTCAGCTCAGACTCCTAAACCTGACCGGGTTTTCCCTGCCCATCTCCCTCCATCCCAATCCATTCAAGACAACAGCTTCCCTATGGACCACAGATT	86	83	N/A	ETV1	300002250;200002250	NM_204917.1:640			ZNF462
151	EYA2	NM_204915.1	TGACAGACTGAAGCTTAACCTTACTAACATTTATGCCACGGCTCCAGATGACATAGAAGGCAACAGTAAAGCAGCACCACAGTGTCCTCTCCATCTTTAC	83	85	N/A	EYA2	330702;230702	NM_204915.1:91			ZNF469
152	FEZF2	XM_414411.3	ATCGGTCTCAAAGGAAAATAAGCAGCACACCTGAGCAAAGTATCCATCACCTGCAGACTCAGCGCACATTGGCTACAGCAGGCACCGATTTACATACAGT	85	87	N/A	FEZF2	300002328;200002328	XM_414411.3:8420			ZNF507
153	FGF3	NM_205327.1	GGCAGGCTTTATGCATCAGAGAACTATAACACAGAATGTGAGTTTGTGGAGAGGATTCATGAACTGGGCTACAACACCTATGCATCCCGTCTGTACCGAA	81	84	N/A	FGF3	394890;294890	NM_205327.1:312			ZNF516
154	FOXA2 (HNF3B)	NM_204770.1	CATCCGCCACTCGCTTTCCTTCAATGACTGCTTCCTCAAGGTGCCCCGCTCCCCAGACAAGCCGGGCAAAGGCTCCTTCTGGACGCTGCACCCCGACTCG	84	89	N/A	FOXA2	300002247;200002247	NM_204770.1:950			ZNF521
155	FOXB1	XM_004943754.1	CATATGATAGCGAAGAAGTGGCACATTAATGAAGCGCCTCTACAGGGGTCTTTTCTGCTCATGTCACCACATAAAACTATCAGATGCTTGGAGGAAGGAC	86	81	N/A	FOXB1	300002309;200002309	XM_004943754.1:120			ZNF821
156	FOXC2	NM_205138.1	CTTTCCCTAACGTGAGGGAAATGTTCACGTCGCATCGGTTGGGGATGGAGAGCGAGCATCAGGTGAGCAGCAACTCCGCGCCTTCCCTATATCGCCACAC	82	88	N/A	FOXC2	300002260;200002260	NM_205138.1:1580
157	FOXF1	XM_414186.4	GCCCTACCTGCATCAGAACAGCCACAACACCGCCGAGCTTCAAGGCATCCCGCGGTATCACTCCCAGTCTCCGAGCATGTGCGACAGAAAGGAATTCGTC	87	84	N/A	FOXF1	300002325;200002325	XM_414186.4:920
158	FOXG1 (BF1)	NM_205193.1	CATGCCCTACAGCTCGGTGTTGACTCAGAACTCCTTGGGGAACAATCACTCCTTTTCCACGTCCAACGGGTTGAGCGTCGATAGACTCGTCAACGGGGAG	85	83	N/A	FOXG1	346125;246125	NM_205193.1:1310
159	FOXN2	NM_001039284.1	TAAGCCTAATCTCGTTCAAGCACTGAAAAAGCAGCCTTTTCCTTCAGCACTTGCATTTTACACTCCACCGGCATCACCACCAAGTAGGTCATCTTCTCCT	80	80	N/A	FOXN2	346111;246111	NM_001039284.1:635
160	FOXP1	NM_001024827.1	CCTCGTCCGCACCGTCTAAGACCTCCTTAATAATAAACCCACACGCGTCGACCAACGGACAGCTATCGGTTCACACTCCTAAAAGGGAGAGCTTATCCCA	82	85	N/A	FOXP1	346236;246236	NM_001024827.1:805
161	FRYL	XM_004936051.1	CTGCTGAAGATGAGACGTGTCAGTCTGCTCTCCTTAGGACAGACAATAGATGAAGACCAGGAGATACATGTTTTACATCCTCATTTCCCCTCCACGCCAC	86	81	N/A	FRYL	300002290;200002290	XM_004936051.1:90
162	FTH1	NM_205086.1	CTGCACCTGGAGAAGAATGTGAACCAGTCGCTGTTAGAGCTGCACAAATTGGCAACTGAAAAGAATGACCCACACTTGTGTGACTTCATTGAGACTCACT	86	85	N/A	FTH1	300002258;200002258	NM_205086.1:460
163	FUBP1	NM_001006535.1	TATTGGTAAAGGTGGAGAGACAATTAAGCAATTACAGGAGCGAGCAGGTGTCAAAATGGTTATGATTCAAGATGGTCCACAGAACACTGGTGCTGACAAG	84	82	N/A	FUBP1	346222;246222	NM_001006535.1:705
164	GAPDH	NM_204305.1	CATGTTCAAATATGATTCTACACACGGACACTTCAAGGGCACTGTCAAGGCTGAGAACGGGAAACTTGTGATCAATGGGCACGCCATCACTATCTTCCAG	81	85	N/A	GAPDH	346114;246114	NM_204305.1:185
165	GATA2	NM_001003797.1	CACCCAGAGATCGAGAACATGGGGCTTTACCTAAGACAACACCAAGTAAGAAAGTGTTCTGCCAAGAGGAGAATGTAGGGATGGCAAAAAAAGGGGATCT	85	86	N/A	GATA2	346102;246102	NM_001003797.1:1830
166	GATA3	NM_001008444.1	CTCTCGCCGAGGAAGTGGATGTACTTTTTAATATCGACGGACAAGGCAACCCCGTGCCTCCGTATTACGGCAACTCCGTGCGAGCCACCGTGCAGCGGTA	81	82	N/A	GATA3	310011;210011	NM_001008444.1:310
167	GATAD2B	XM_423773.4	TGAGGCAGAGCCAGCTGCAGAAGGAGAACGTGGTACAGAAGACTCCGGTTGTCCAGAATGCAGCGTCTATCGTCCAGCCATCTCCTGCTCACGTGGGACA	87	87	N/A	GATAD2B	300002354;200002354	XM_423773.4:570
168	GBX2	NM_205068.1	TGAGCGCCGCTGGGGGGGCAAAAAAGTTGACAACCGGGGTTTTCGCCGGACCCGCTCTGAAAAGCGAAACGAGCGACGGAAACCAACCCAAACAGACGAA	84	85	N/A	GBX2	310050;210050	NM_205068.1:1074
169	GCM1	NM_206980.1	TTGAGAGTGCTGACAACTTCAAAAGCAGCCGGTAGAGACTTTCTTGCAAAGTTCGGGAAGGATCTCAAAAATGCTGAAGGCTGCAGACAGTGTTGCTATG	82	85	N/A	GCM1	300002270;200002270	NM_206980.1:40
170	GFI1	XM_426644.4	TCACTCTTGGTTTCCTGTCAGGAAAGCCTAGAGGATCTGGATTGAAGTGTGCAGTTAGACATATGGCTATTTTTGAAGCTGAGGCACCAGCTTGGGCCTG	82	84	N/A	GFI1	300002364;200002364	XM_426644.4:1730
171	GLI2	NM_001098851.1	CTGTTGATGTGTCCCGGTTTTCAAGCCCACGGGTGACTCCGAGGTTAAGCCGAAAACGAGCCCTGTCTATCTCCCCGCTGTCTGATGCCAGCATTGATCT	82	85	N/A	GLI2	326246;226246	NM_001098851.1:522
172	GLI3	NM_001271903.1	TGTGTACCAGCAAAATGGCTATCAGAACCTGATGGAAAACAATGGTTCCTATAGTTTGCAGCAGAACACGGTCCTTGGCAGCGGAGCCAGTAGTTCTTTC	84	82	N/A	GLI3	300002228;200002228	NM_001271903.1:3620
173	GEMININ	NM_001031010.1	TCCTAACCGCGTGACTTCTGGCCGAGTTCTCAGTATTGCTTGATCTGATGAATTCCAAAATGAAACAAAGCCTGAATGTGGAGAACCCGTCTGGATCTCT	80	84	N/A	GMNN	346106;246106	NM_001031010.1:190
174	GRHL1	XM_004935752.1	TAAAAGACCCGTGTTGGTTCTTCAGAATGACTCTCTCTACTCCCAGAGACGTCCTTACACCAGCGAAGATGAGGCCTGGAAATCCTTTCTTGAGAACCCA	82	85	N/A	GRHL1	300002289;200002289	XM_004935752.1:10
175	GRHL2	XM_004939981.1	TACTATAATACAGATGATGAGAGAGAAGGTAGCAGTGTCCTGGTCAAGAGGATGTTCCGACCTGTGGAGGAGGAGTTTGGTCCATCCCCTTTGAAACAAA	85	83	N/A	GRHL2	300002301;200002301	XM_004939981.1:1740
176	GRHL3	XM_004947907.1	ATGACTCGGATATCACATCCTTTGATGGCTCAGCCCATCTCATGAAGCTCTTGTCTGAAAACACTTCCATGACCCAAGAATATTGTGAACCACAGAAGAA	83	81	N/A	GRHL3	300002319;200002319	XM_004947907.1:370
177	GSC	NM_205331.1	AAGAAGACGGGAAAAGCGATTTGGACTCCGACAGCTGATGCCGCGCAGGGGGATGCTCCCCGTGGACTGTAGGATACGCTCCGGAGGATGCTACTATCTT	88	89	N/A	GSC	300002265;200002265	NM_205331.1:700
178	HDX	NM_001031120.3	AACTGCAGAGTTAGTGTTACCTCAGAAACCAATGATATGCCACAGACCCTGTAAAGCTGAACTCATGGGCTGTCAGAGATTACAAAAACCAGAACATGCA	85	85	N/A	HDX	300002209;200002209	NM_001031120.3:850
179	HES1	NM_001005848.1	AAACTCTGCCTTGGCTCCGTTGTATGGAGCCCCGTTGTGGTTGTTGTATTTTCCTAAGCAGATTTCAACACGGGGAAAGGATTAAAAAGGACCTCGCTAG	79	83	N/A	HES1	346180;246180	NM_001005848.1:898
180	HES5	NM_001012695.1	CAAAGAAGCTCTGCAATTCCTGTCTCTCCATTCAGCAAACACAGAAACTCAGATGAAGCTGATCTGCCATTTCCAGAGGTCACAAGCAATGCCCAAGGAC	82	85	N/A	HES5	346225;246225	NM_001012695.1:320
181	HESX1	NM_205012.1	CACAGTCACTGAAAGGTTATCTTTCAAACGAGAATTGAGCTGGTATAGGGGTAGAAGACCGAGAACTGCTTTCACTAGAAACCAGATTGAAGTCTTGGAA	79	82	N/A	HESX1	346095;246095	NM_205012.1:341
182	HIC2	XM_001232784.1	TTGGTGTTGGGAGATCTGCCAGGAGTCAGAGACTTTCCACTGCTTCTGTCATTCAAGCTCGCTATTCAGGGTCAAATGAGGGGTTGAAGGGCTCGCATTC	84	83	N/A	HIC2	346356;246356	XM_001232784.1:1170
183	HIF1A	NM_204297.1	TATGGTGCTTTCTGAGGATGGGGACATGATTTACATGTCTGAAAACGTGAACAAGTGTATGGGACTCACTCAGTTCGATTTGACGGGGCACAGTGTATTT	80	80	N/A	HIF1A	346113;246113	NM_204297.1:340
184	HIPK2	XM_003640420.2	GCTGGTGCAACATGAGGTGCTCTGTTCCATGACCAACACGTACGAAGTGTTAGAATTTCTTGGCCGGGGAACCTTCGGACAAGTAGTCAAATGCTGGAAA	87	83	N/A	HIPK2	300002274;200002274	XM_003640420.2:650
185	HIVEP2	XM_419711.4	ACAGTTAAACAGCGACTTGCACTAAGACTGTCAGAGAAAAAAGGGCAAGATTCTGAGCAGTCCTTAAACCTCCTTAGCCCACACAGTAAAGGAAGCACTG	86	85	N/A	HIVEP2	300002343;200002343	XM_419711.4:1780
186	HIVEP3	XM_004947685.1	TAGCCAGTTGGATGCCTCAAAAGCGTTGACATCCCATGGTGAAAAAATGAAGCCCGAACAATCATTGTTGTCACTTCAGCAATCCCACAGTGCCACAGAG	83	83	N/A	HIVEP3	300002317;200002317	XM_004947685.1:2510
187	HMGA1	NM_204369.1	ACATCGAAGTGCGTATGAAGCAGTGGTGTGTGATTGAATTCCTGCATGCGGAAAAGATCGAACCCGTCGACATTCATCGACGGCTGCTGAACGTGTACGG	81	84	N/A	HMGA1	300002236;200002236	NM_204369.1:360
188	HMGA2	NM_205001.1	CCAACTGGTGAACCATCTCCTAAAAGACCAAGAGGAAGACCCAAGGGAAGCAAAAACAAGAGTCCCTCTAAAGCAGCTCAGAAGAAAGCAGAAGCCACTG	87	89	N/A	HMGA2	300002255;200002255	NM_205001.1:180
189	HMX3	NM_001007985.1	GCCGAGGGCTCTGTTCGCCCCTTCGGGCAAAGCGGACGGCTCCGGCTTCGCCCTCTCGCAGGTGGGAGATCTCTCCTTTCCCCGCTTCGAGATCCCGGCG	85	85	N/A	HMX3	346088;246088	NM_001007985.1:116
190	HOXA1	XM_003640697.2	TTCGATCGGTCAGGGCTGACGGCAGCATCAAGCAGACGTGTTAAGCTCCAGCAGATACCTCAAAGCGTAGCGCTATTTCCCAAAACGTGACAAACAAGGC	87	85	N/A	HOXA1	300002276;200002276	XM_003640697.2:1510
191	HOXA2	NM_205150.1	TATCTCCGCTGACAGCTTTGACTTTTTTACAGACACGCTCACCACGATTGACTTACAGCATCTGAATTACTGAGAAATTAAAGACGTCCTCTCCCAGGGA	77	82	N/A	HOXA2	346333;246333	NM_205150.1:1155
192	HOXB1	NM_001080859.2	AACGAAGCAAAAACGCAACTCCTCTGCTGCCATTTTGCACTATCGTCGCTTTACAGGGTTTCCTACACGCTCTCCGCCTGTATTACCGATCCTGGGGGTG	82	84	N/A	HOXB1	300002217;200002217	NM_001080859.2:1480
193	HOXC6	XM_003643454.2	CACAGGATTTTACCAGTGACCAAAACAGGAACACTTCGCAAGAACAAAAAACTAGCATTCAAATATACCCATGGATGCAGCGTATGAACTCCCACAGTGG	82	84	N/A	HOXC6	300002284;200002284	XM_003643454.2:540
194	ID3	NM_204589.1	AGTTTGTGTCACTAACGCCTCCTCCATCAGTGCCGATTAGCAAACACGCACCGACCGTCGGTTCCCGATTCGTTATCAGCCGGAGGTAACGAGCCGCTTC	82	83	N/A	ID3	300002239;200002239	NM_204589.1:530
195	IGHMBP2	NM_001031175.1	TGTAGTCCTTGCTACAAATACAGGTGCTTCTTCTGATGGCCCGCTGAAGCTGCTGCCTGAGAATTACTTTGATCTGGTGGTGATAGATGAGTGTGCCCAA	85	83	N/A	IGHMBP2	300002210;200002210	NM_001031175.1:850
196	ING5	NM_001031312.1	GGATTTGAAGGATAAACTGGAGGGCAGTGACTTTGAGAGCTCTGGATCACGAAACCTGAAAAAGGGAAAAAGTCAGAAAGACAAAAGAAGCTCTCGTGGC	85	85	N/A	ING5	346094;246094	NM_001031312.1:373
197	INTS1	XM_414768.4	TCCGTACTTGGAGGAACTCCTCACAGTCCTCTTCTCAGCTACTGTTGAGACCACTGCCAGATTTCCTGCCATGAAACCAATTGCTGTGGTGAGCTCCTTG	84	84	N/A	INTS1	300002330;200002330	XM_414768.4:4430
198	IRF1	NM_205415.1	TGCAGATTAATTCCAATCAAATACCGGGGCTGATCTGGATCAACAAGGATAAGATGATATTTCAGATCCCATGGAAACATGCAGCTAAGCATGGCTGGGA	83	85	N/A	IRF1	300002268;200002268	NM_205415.1:160
199	IRF6	XM_417990.4	CAACATGACTTCTTCAGCAGCCCGGAGCTCTGGATCAGCTCTCTTCCAATGACAGACCTAGAAATCAAGTTTGAATATCGAGGAAAGGAGACTGGGCAGA	84	87	N/A	IRF6	300002335;200002335	XM_417990.4:630
200	IRF7 (IRF3)	NM_205372.1	CCGCTCCAAGTGCAACGACGACCCGCACAAGGTCTACGCGGTTGCCTCAGGCGTCCCCAATGACAGAGGTTCTGGGGGCCCTGTGGCAGGCGCCCTGCAA	88	88	N/A	IRF7	300002266;200002266	NM_205372.1:340
201	IRF8	NM_205416.1	GGGAGGCTGGTGGGGCACATCACCACCTCGTATCCTGAGGGCTGCAGGCTGTCCCTCAGCCAACCCTCTAACCACGGTGAGAAGCTCTACACCCCTGACA	87	88	N/A	IRF8	300002269;200002269	NM_205416.1:690
202	IRX1	NM_001030338.1	GCAAGTTTCACAACTGGACAAATGGGGCTTTTCTCACGCAGAGTTCCCTGCTAAACGTGAGGTCGTTTTTGGGAGTAAATCACCACCATGCCACTCACCA	82	81	N/A	IRX1	310013;210013	NM_001030338.1:1075
203	IRX2	NM_001030336.1	GACTGTCCTAAATGCCAGCTCTGTCCACAAGCAGAGCAGTGACTCTTTGAAAACGATCACTAACCAGCTAGAACAACATTACAGGCCCTCTAGTTATGAC	84	84	N/A	IRX2	346104;246104	NM_001030336.1:1280
204	IRX3	AJ238355.1	CCCAAGAACGCCACCCGCGAGAGCACCGGCACGCTCAAGGCCTGGCTCAACGAGCACCGCAAGAACCCGTACCCCACCAAGGGTGAGAAGATCATGCTGG	91	90	N/A	IRX3	346031;246031	AJ238355.1:9
205	ISX	XM_004937800.1	CAGGGCAAGCGGGAGAAGGCTCTCTACCCTGGTGCTGCCCTGGTACGAAGATGATGGATCCCTGTGAATGTGCCAGCCAGAGGAAGCCCAGCCTGTCCTT	88	88	N/A	ISX	300002293;200002293	XM_004937800.1:100
206	IVNS1ABP	XM_004949880.1	TAGATGACTGGACTCCTGTTCCGGAGCTGAGAACCAATCGTTGCAATGCAGGAGTATGTGCCCTGAATGGAAAACTGTACATTGTTGGTGGTTCAGATCC	86	82	N/A	IVNS1ABP	300002323;200002323	XM_004949880.1:1400
207	JDP2	NM_001277887.1	GGAGTTCCTGCAGCGGGAGTCCGAGCGCCTGGAGCTCATGAACGCTGAACTGAAGGCCCAGATAGAAGAGCTGAAACAAGAGAGGCAGCAGCTGATCCTG	89	89	N/A	JDP2	300002377;200002377	NM_001277887.1:290
208	KAT2B	XM_426001.4	ACTGGTCAGCTGGGAATCCAGACAGTTATCAATCCTCCTCCTGTTGCAAGATCTGTTTCGTACTGTGCAAGCCCGTCGTCTCTGGAGCAACCCAACAGTG	85	83	N/A	KAT2B	300002360;200002360	XM_426001.4:1270
209	KDM4A	XM_422410.2	CCTGGGCAGATAGTCATCAGCAAGCACAAGAATGGTCGCTTCTATCAATGTGAAGTGGTCAGCCTCGCAAAAGAGACTTTCTACGAGGTCAACTTTGATG	83	81	N/A	KDM4A	346451;246451	XM_422410.2:2805
210	KIAA2018	NM_001277825.1	GTTGCAACTCTGGAGAGAGAGCAGCAGACTTTTAAACCTCTACCAGTGAAAGAAAGCAATGCAGGGCCATTAGAAACAGCGTCAAACAAATTCAGTGCTC	85	84	N/A	KIAA2018	300002376;200002376	NM_001277825.1:3590
211	KLF15	XM_004944605.1	GAGTAAAAATGAACAGTTGAGCAGCTCAACGGAAGGTGGCCAAGCTTCAAATGGAGGAGTGTCCCTGGAGAATGGCATACCGGTTATGCTCCAAATTCAG	86	85	N/A	KLF15	300002312;200002312	XM_004944605.1:760
212	KLF3	XM_427367.2	AATCACCCTTCGGTTATAGTTCAGCCAGGGAAGAGACCTTTGCCAGTGGAGTCACCAGACACGCAAAGAAAACGCAGAATACATCGGTGCGATTATGAAG	83	84	N/A	KLF3	346474;246474	XM_427367.2:790
213	KLF5	XM_417013.4	TGGCAATTCACAACCCGAATTTACCTGCAACTCTGCCAATAACTCCCCAGAACATACAGCCAGTCAGATACAACAGGAGAAGTAACCCAGATTTGGAGAA	84	86	N/A	KLF5	300002333;200002333	XM_417013.4:810
214	KLF6	NM_001030969.1	TGATGTTTGGGGTTTCCTGGACTCATACACTGGTATCTAACCTTCTGAGTGGCTCCTAAGCCTTTGCCGTGAGCATGTGCACTGAGAATGTTAATGATTG	80	82	N/A	KLF6	346246;246246	NM_001030969.1:1395
215	KERATIN19	NM_205009.1	GATCGCTACTTACCGGCAGCTCCTGGAGGGTCAGGAGTCCCAGTTGTTTGGATCCCTTTCTGGATCTCCCGACAAAAGAGACAAGCCGGCAGATGGAAAA	86	86	N/A	KRT19	346123;246123	NM_205009.1:1280
216	KERATIN7	ENSGALT00000045526.1	TCCCAGGCAGTGGTTTGCAAGCTCAGTGCCCCTCTTAAGACGCCTCTTCCAATGGCAGCACAGAACCATGAGGAGACACTTCTCAGTCAATAAGTCTGAT	87	86	N/A	KRT7	300002440;200002440	ENSGALT00000045526.1:2656
217	LDB2	NM_204829.1	TCACTAGATTAGAGAATACACAGTATGATGCAGCAAACGGCATGGATGATGAAGAAGATTTCAACAATTCACCTGCACTGGGAAATAACAGCCCGTGGAA	84	84	N/A	LDB2	300002249;200002249	NM_204829.1:1000
218	LDHA	ENSGALT00000039415.1	GGCTATTGGCCTTTCTGTGGCAGATCTAGCTGAAACTATCATGAAGAACTTAAGAAGAGTGCACCCAATCTCTACAGCTGTTAAGGGCATGCACGGAATA	83	86	N/A	LDHA	300002437;200002437	ENSGALT00000039415.1:803
219	LEF1	NM_205013.2	ATCATAAAGACAATCACTGCCAAAATCCTTCACTATCACGAGGTCCAGCCCTGATATAAATAGAGCGAATAAGCTCCTGGGTCAGCAGAGCAGCTTTTGT	83	82	N/A	LEF1	330703;230703	NM_205013.2:1286
220	LFNG	ENSGALT00000006809.1	CCGCAACCGCGACATGACCTTCATCTTCACGGATGGGGAGGATGAGGAGCTGAAGAAGCAAGCACGAAATGTCATCAACACCAACTGCTCGGCTGCACAC	88	88	N/A	LFNG	300002431;200002431	ENSGALT00000006809.1:99
221	LHX5	XM_004934489.1	GCTGAACGTCTTGGACAGGGCATGGCACATCAAATGCGTCCAGTGCTGCGAGTGCAAATGCAACCTGACCGAGAAATGCTTCTCCAGGGAAGGAAAACTC	89	88	N/A	LHX5	300002287;200002287	XM_004934489.1:160
222	LIN28A	NM_001031774.2	ATGCCAAAGAGTGCAAGCTGCCTCCGCAGCCCAAGAAATGCCACTTCTGCCAGAGCATCAGCCACATGGTCGCCAACTGCCCTGCCAAAGCTCAGCAGTC	87	88	N/A	LIN28A	300002213;200002213	NM_001031774.2:530
223	LIN28B	NM_001034818.1	GAGAAAGGGAAAAGGCAAAAGGGGGAAAGCACGTTGGACCATGCGAGCGAAATTGGGGCTCGTGCAGACGCAGGATGTTGGGTTAAAGCAGAAGAGCACT	88	88	N/A	LIN28B	300002214;200002214	NM_001034818.1:0
224	LITAF	NM_204267.1	GCCCAGTTCAGATGAGTTGCCCTTCCTGTAACCAGATGATCGTGACACGTCTCTGCTATGAGTCAGGAGCGTTGACTTGGCTGTCGTGTGGTGGCCTCTT	83	85	N/A	LITAF	300002233;200002233	NM_204267.1:400
225	LMCD1	XM_414443.4	CCTTGCCGTGTGTTTGTGTTGCAATGAGCAGAGAAGGGGGTGAGCCCGTCCTCAGCCCAGGTGGGGTGTTTCTTCAACAGCAGGGTGTGTTCAGGGATCC	86	86	N/A	LMCD1	300002329;200002329	XM_414443.4:3220
226	LMO7	XM_004938645.1	AGTATGAGGAGAGGGGAGTCTTTGGACAATCTCGATTCTTCAAGAACAAGCTCGTGGAGGCACCACTCAAGGTTGAACCAGTCCTCCTCCACTTCATCTC	82	86	N/A	LMO7	300002297;200002297	XM_004938645.1:4350
227	LMX1B	NM_205358.1	TTGTGATGAGAGCCCTGGAGTGTGTTTACCACTTAAGCTGCTTCTGTTGCTGTGTTTGTGAGCGACAGCTGAGAAAAGGGGATGAGTTTGTTCTTAAGGA	81	80	N/A	LMX1B	346126;246126	NM_205358.1:385
228	LMO1	XM_003641297.2	AGGTTCAATAGCGATCCCTGCTTCGCTGGAGCACTGTGGATGGGCGCCCGGCCGCGCCAGCAGCCAGCCGTCTGTCAGCTTGCCTGCAATATTTTTTTAA	88	80	N/A	LOC100858792	300002277;200002277	XM_003641297.2:590
229	PHF20	XR_026848.1	TTCCTGTTGAATCTGACCAAAGTTTTGGTGAACAGGCGTCTCCTGGAAACGCATCACATAGCACGGTACTCAGTACGGATGCCAGTTTACAAGAAGAAAA	81	83	N/A	LOC419131	346127;246127	XR_026848.1:1120
230	ZIC2	XR_026941.1	CTGCAAGTGGATCGACCCCGAGCAGCTGAGCAACCCCAAAAAAAGTTGCAATAAAACTTTCAGCACCATGCACGAGCTGGTCACCCACGTCTCGGTGGAG	86	85	N/A	LOC428021	346090;246090	XR_026941.1:644
231	MAFA (L-MAF)	NM_205025.1	GCGGAGCGGGACCGCAGCAGACGTTCGGCGGAGTTGGGCTGAAGTCCGCGACAAAGCAACGTCGGAGGTTCTTCGGAGTCGGGCTGCATCTTGGAGCAGA	88	87	N/A	MAFA	300002257;200002257	NM_205025.1:280
232	MAML2	XM_003640590.2	GGGATATGGGTTCCACACTGCTTGACTTCACTGCTACAGAATAGTCTACAGGCTTGAACAGTAAGGACATCAGAAAGAGGTCCTATGTCACAATAAAGTA	84	83	N/A	MAML2	300002275;200002275	XM_003640590.2:4200
233	MAML3	XM_420411.4	AACATGAACGTGGTTGTGCAGTGAGGACAGTTTGATTACAGGACCGCTGCTGGAGGTGGCTTTAGTGGGTGGGTTGTGTAAGGAGCTATTTAGTCCCCAA	85	83	N/A	MAML3	300002344;200002344	XM_420411.4:3690
234	MBD3	NM_001079751.1	CACCGGTCCAGCTGCAACTATGAGCATTTTGATGTACACTTCAGGAAAGCCAAGAAGCTGATGGTTCATTCATTGCTGGGTAGTTTGGAAGATGGAACTT	83	79	N/A	MBD3	346261;246261	NM_001079751.1:1180
235	MBNL2	NM_001163376.1	CCAAAGAGACAAGCACTTGAAAAAAGCAATGGTGCCAGTGCCGTTTTCAATCCCAGTGTCTTGCACTATCAACAGGCTCTTGCCAATGCTCAGTTGCAGC	82	85	N/A	MBNL2	300002223;200002223	NM_001163376.1:730
236	MDFI	XM_418042.4	TTCATCCCACATCCCTATTGAGGCGCAGGAAGATTGCTGTGTCCACTGCATCCTATCCTGCCTCTTCTGCGAGTTCCTGACCCTCTGCAACATCGTGCTG	85	85	N/A	MDFI	300002337;200002337	XM_418042.4:450
237	MEIS1	NM_001139477.1	ACTGATTTTTGAGAAATGTGAATTAGCCACATGCACGCCCAGGGAGCCCGGGGTAGCGGGAGGCGATGTTTGCTCCTCCGAGTCTTTCAATGAAGACATA	84	83	N/A	MEIS1	394886;294886	NM_001139477.1:312
238	MEIS2	NM_204803.1	TTCCACCTCCTGGAGTTAGAGAAGGTTCACGAATTGTGCGATAACTTCTGCCATCGGTACATTAGTTGTTTGAAAGGGAAAATGCCAATAGACCTCGTGA	79	78	N/A	MEIS2	346315;246315	NM_204803.1:465
239	MGA	XM_421144.4	AAGAATCTTGTAAGAAGGAAACCAGCGAGATAAACAAAGACCCTGAAAAATGTGGAGAGAAAAGTTCGTGGTCTTCCCATAGTGAGGGGGACACTTCCTC	84	86	N/A	MGA	300002346;200002346	XM_421144.4:3920
240	MID1	NM_204129.1	TTCACGAGCCAAGGGAGCTACGGAGTAGCTGGCAATGTATTCATTGACAGTGGACGGCATTACTGGGAAGTGGTTATAAGTGGGAGTACATGGTATGCCA	85	86	N/A	MID1	300002232;200002232	NM_204129.1:1620
241	MIER1	NM_001031292.1	TGCCATTCCTGAGGGATCGCATATTAAGGACAATGAGCAGGCGTTGTATGAGCTGGTTAAGTGCAATTTTGATACTGAGGAATCTTTACGAAGGCTGAGG	83	80	N/A	MIER1	346108;246108	NM_001031292.1:760
242	MIXL1	NM_204990.1	TTTGCACTTTATCCCGCGGACTGCGCCTATTTATGCACGGGAGATGGGGGCGGCTGCGCCGGTTGCCGGCACCGTGTTACACTGTTTACAGCTTCTATTT	84	80	N/A	MIXL1	300002254;200002254	NM_204990.1:660
243	MKL1	XM_416243.4	GAGAAGAACATCTTGCCTGTGGAATCCAGCCTGAAGGAAGCCATTATAGTTGGACAGGTGAACTACCCAAAGGTTGCAGACAATTCCTCCTTCGATGAGG	86	86	N/A	MKL1	300002332;200002332	XM_416243.4:730
244	MLLT3	XM_004949131.1	GGAACACAACAAATCTTCCAAAGAATCCTCTAAGAAACCCAAAGAAAATAAACCACTGAAAGATGAAAAATTGGTTCCTAAGATGGCCTTCAAGGAGCCT	81	84	N/A	MLLT3	300002322;200002322	XM_004949131.1:940
245	MLXIP	XM_415149.4	GTTCGAATCTCACTGAATGAATTGGATGTCAAAAGGGACCTTAAAGGACTAGGAAGGGTGGGAAGTATGAGTGAACTGCTGCAACTTTTACCCATTAATG	80	84	N/A	MLXIP	300002331;200002331	XM_415149.4:5040
246	MSX1	NM_205488.1	AGCGCCCGTGCGGCCCCTGGCAGAGACTTCTCCGCTCCCTTCATCCAGACCTTCAACCCTGGGATCTGTTCTGTGCCTGGCAGGAAGGAACCCGTGGTGC	83	82	N/A	MSX1	310040;210040	NM_205488.1:950
247	MSX2	NM_204559.1	CCTCAAGAATGCAGTACCCAACCGGTACTGGCCGTTCTTTCTGCACGCTTCTATCTGCCATCCCGAGTGTACAGGAGTTCGCGTTAGCAAAGCAAGGCAT	80	81	N/A	MSX2	310057;210057	NM_204559.1:937
248	MTA1	NM_001012953.1	GTTTGGGAAGCCTTTAACCCGCTAGTAGACAAGCAGATAGACCAGTTCTTGGTGGTAGCACGGTCCATTGGTACATTTGCCCGAGCACTAGATTGCAGTA	81	83	N/A	MTA1	300002202;200002202	NM_001012953.1:700
249	MYC (C-MYC)	NM_001030952.1	TCAAGCGGTGTCACGTCAACATCCACCAACACAACTACGCTGCTCCTCCCTCCACCAAGGTGGAATACCCAGCCGCCAAGAGGCTAAAGTTGGACAGTGG	89	88	N/A	MYC	300002206;200002206	NM_001030952.1:820
250	MYCL1	XM_004947887.1	CTCTCCGGGTCGCGGGTTTTCGGGGCTCCGCAGTCCCCGCCGTCCCACGGCCAGTTCCCATTCCCGGGCTCACGGCCGCCGGGAAATGCTGACGCGGGGC	89	88	N/A	MYCL1	300002318;200002318	XM_004947887.1:910
251	MYCN (N-MYC)	NM_001031091.1	ATGCCGGGAATGATCAGCAAGAACCCGGACCTCGAGTTCGATTCCTTACAGCCTTGTTTCTACCCGGACGAAAATGATTTCTATTTATGCGGGCCGGACT	82	80	N/A	MYCN	310015;210015	NM_001031091.1:0
252	MYSM1	NM_001012927.1	TGGATCAGTGGGAAAGGTGTAAACCCAAATACCTGAATAAGACCTCAGTACGTCCGGGCCTTAAGAACTGCGGTGATGTTAACTGTATTGGACGGATCCA	86	83	N/A	MYSM1	300002201;200002201	NM_001012927.1:1270
253	NAB1	NM_204268.2	CTTGCTTTGGCCAAGGGGAAGAGTGAGGATTCAGCAGCTCTTAATGCCCAGTCTGAAAAGGTGATGGCAAAACAGATGGAGTTCCTTTGCAACCAGGCTG	86	85	N/A	NAB1	300002234;200002234	NM_204268.2:1080
254	NANOG	NM_001146142.1	GAAAGAGAGTCAGTGGGTGGATAAAGGGATTTATCTACCACAGAATGGGTTTCATCAAGCTGCGTATCTGGATATGACCCCTACATTTCACCAGGGCTTC	85	82	N/A	NANOG	300002222;200002222	NM_001146142.1:470
255	NCAM1	NM_001128828.2	ACTTTAAAATGGACGAAGGGACCTTCAAGACACCAGACATTGATCTTGCAAAGGATGTTTTTGCAGCTCTTGGCACTACTACTCCTGCCAGTGTGGCTAG	82	84	N/A	NCAM1	300002220;200002220	NM_001128828.2:3230
256	NCOA2	XM_001231577.3	TCCTTGTCGGATGGCACTATAGTTTCTGCCCAAACGAAGAGCAAACTCATCCGTTCCCAGACTACTAGTGAACCTCAGCTTGTCATCTCCTTGCATATGC	82	82	N/A	NCOA2	300002271;200002271	XM_001231577.3:1360
257	NEUROG2	NM_204796.1	TAGGCTGAACTCTCTTATCAAAAGGAAAAACTGTAGAGGGAAGGGAAGGGGTGGGTGGGAGGGAGGAGCGCCTCATGCATATATTTATTTCGACCTTTAG	86	81	N/A	NEUROG2	346313;246313	NM_204796.1:960
258	NFKB1	NM_205134.1	GATGAAGGAAACAAACCAAAGTGTGGTTGTCAGGATGGTCTGTTCCTGGAGAAGGCTATGCAGCTTGCCAAGCGTCACTGCAACGCTCTCTTTGATTATG	84	83	N/A	NFKB1	346124;246124	NM_205134.1:1855
259	NFKB2	NM_204413.1	GGTGGGCAAGCAGTGCAACGAGGCCGGCAACTGCGTCGCCATCGTGGGGCCCAAAGACATGACGGCACAGTTCAGCAACCTGGGTGTGCTCCACGTCACC	89	88	N/A	NFKB2	300002237;200002237	NM_204413.1:720
260	NKX1-2	XM_003641503.2	CGGCTCTGTCCCAGCGCTCCGGGGGTGAGGAATCGGGTTTTTCTTCTCCGACTCGCTTCGACAAAGAGAAAAAATACCTACATGCTGTAACCACTGGATT	84	82	N/A	NKX1-2	300002279;200002279	XM_003641503.2:520
261	NKX6-2	NM_001199548.1	TGGCGGGACCCGCGCCTCACCTGTCCCGCTCAGACGGGGATGGTTTTGGACAAGGACGGGAAGAAGAAGCACTCGCGCCCGACTTTCTCGGGGCAGCAGA	85	85	N/A	NKX6-2	394887;294887	NM_001199548.1:387
262	NOGGIN	NM_001039604.1	CGCGCTACATCAAGGAGGGCAACTGCTTCGCCGAGAAGTCCTGCTCGCTGCCCGAGGGCATGTTCTGCAAGCCCGTCAAGTCGGTCACCAAGACGTTCCT	88	86	N/A	NOG2	300002216;200002216	NM_001039604.1:430
263	NR0B1	NM_204593.1	GTGGCCCTGAAGAGCCCGCAGGTGGTCTGCAAAGCGGCCTCGGCCGTGCTGGTGAAGACGCTGCGCTTCGTGCAGAACGTGCCCTGCTTCCAGGAGCTGC	89	88	N/A	NR0B1	300002240;200002240	NM_204593.1:210
264	NR2C2	XM_004944728.1	AACAGTTCAACCCAAATAGAAAAATTCCAGGAGAAGGCACAGATGGAATTACAGGACTATGTGCAAAAAACGTATCCAGAAGATACTTATAGGCTAGCCC	82	85	N/A	NR2C2	300002313;200002313	XM_004944728.1:1530
265	NRIP1	XM_004938351.1	TGGAGTACTGCATTTCATCAAGCGTAGCACACAGATTTGGTGAGGAAAATGGTGGAACATTTGTGAACCAGATAGTCAGATTGTGTGTTGCCTCCTGCAC	81	82	N/A	NRIP1	300002295;200002295	XM_004938351.1:4710
266	TRKC (NTRK3)	NM_205169.1	AAGTGCCTGCTACACATACAACACTGAAAACAAAACGAAACTAAAAGCAAACCAACAAAATTCCCACAAAACGACGACCTGTAAGGCAGTTTGGCTTATA	85	81	N/A	NTRK3	300002261;200002261	NM_205169.1:2960
267	OBELIX	AY103477.1	CCGCAGCAGCGCATCGTCAGGGTGCTGGGCAGCCCCGGGAATAATCTGCACGAGGTGGAGACGGCCGACGGGTCGCGCTTCCTGGCCAGCATGCCGCCGC	88	88	N/A	OBELIX	300002189;200002189	AY103477.1:120
268	OTX2	NM_204520.2	GCTGACTGCTTGGATTATAAAGACCAGACATCCTCATGGAAGTTCCAGGTTTTGTGAAGGCCCGTGGGAACCTTTGTGATAATAAGAGAAATCGTGACGA	84	81	N/A	OTX2	330696;230696	NM_204520.2:842
269	OVOL2	ENSGALT00000014161.1	CCTTTGATCTGAAGCGCCACGTCCGGACCCACACCGGAATTCGTCCTTACAAATGTGAGGTTTGCAACAAAGCATTTACCCAGCGGTGTTCCCTGGAATC	84	81	N/A	OVOL2	300002434;200002434	ENSGALT00000014161.1:442
270	PAX2	NM_204793.1	CCTAAGTCTTGAAGTTGAGTTTTAGAGGCGACACGGCGGCTTCAGCCGATTTCTTCCCTTTCCTTTGCCTCCCCATGGATATGCACTGCAAGGCAGACCC	81	84	N/A	PAX2	330700;230700	NM_204793.1:98
271	PAX6	NM_205066.1	AAGAGTTTGAGAGAACCCACTATCCTGATGTGTTTGCGAGAGAGCGACTAGCTGCTAAAATAGACTTGCCTGAAGCAAGGATACAGGTGTGGTTTTCTAA	82	81	N/A	PAX6	326252;226252	NM_205066.1:1050
272	PAX7	NM_205065.1	AGAGACAATAGGTTGGGTACATTTATTAACCCGAGTTCATGCCTCCTCTACTGGCCATGTGTCTGCCCATGCTAAAGACCTTCCATTGATCTAGTAGTTG	78	81	N/A	PAX7	310031;210031	NM_205065.1:1990
273	PBX4	XM_004950821.1	CCGCCGGAGACCCTGGGAGCGTTAATTCCGACGCGTCCAATTAAGCCCTTAGGACCCGACCGATGAGAGGAAAGAGGTCATTAGTGTAATTTGTCAGTGT	85	82	N/A	PBX4	300002380;200002380	XM_004950821.1:1210
274	PCNA	NM_204170.1	AGCAGAAGACAATGCGGATACGTTGGCTCTAGTGTTTGAAGCACCAAATCAGGAAAAGGTTTCTGATTATGAGATGAAGCTTATGGACCTCGATGTGGAG	81	81	N/A	PCNA	310019;210019	NM_204170.1:275
275	PDCD4	ENSGALT00000014159.1	GTTTCCTTGGCATTAGAGGGGAAGGCTAGTCACAGGGAGATGACATCTAAGCTTATCTCCGACCTTTGTGGGACAGTAGTAAGCAAAACTGATGTGGAAA	85	82	N/A	PDCD4	300002433;200002433	ENSGALT00000014159.1:606
276	PDLIM1	XM_004942093.1	GTGTTTGTGAAGATTCGGGACAAGCAGCGTCACCCTGAGTGCTACGTGTGCAGTGACTGCGGCACCAACCTCAAGCAGAAAGGACATTTCTTCGTGGAAG	84	86	N/A	PDLIM1	300002381;200002381	XM_004942093.1:609
277	PDLIM4	NM_204839.1	CTGCAGCCCGAGTAAAATGCCTTTCTGTAGATAAAACCGTTTACACTTGGGATCTCCAGGGGATGGTGTTGAAAGCGTATGAACAGGTTTTTCCCTTCTC	78	79	N/A	PDLIM4	346121;246121	NM_204839.1:1090
278	PDLIM5	ENSGALT00000037662.1	GAAAGAAAGCGTAGATGGGATACCATTCCTGACATCATGGCGTGTACTACCAGAACACTAGCCAAAACAAAGTGCTAGTTGAGGTGCATTTGACAAGACA	85	83	N/A	PDLIM5	300002436;200002436	ENSGALT00000037662.1:2580
279	PHF15	XM_004944998.1	CTCTGAGACTCCTTGAACCGACTGTCCCGGTGTTTTAGAGTAGATCAGCTTTATCAGCCTTCAGAGAGTCCTGATTAGCGGTCAGATTGCAGCCCGGCTC	82	84	N/A	PHF15	300002314;200002314	XM_004944998.1:3540
280	PHTF1	XM_418005.4	GCTTGTACTGGAACGACACAGGTGGTTGCTACAGGTGCTTTGTTTCTCCAAAAATCGGTCCTGTGCAATAACCTAACAAATCAGTCCTGGTGGTGTTCGC	82	82	N/A	PHTF1	300002336;200002336	XM_418005.4:2640
281	PITX1	NM_001167684.1	TGGAGAGACTGCCCGAGAGCTTGAGACCCCAACCCTCCCATGACATGGCTTCCAGCTTCCATTTGCAAAGATCCTCGGAGCCCAGAGACCCGATCGAGAA	89	86	N/A	PITX1	300002224;200002224	NM_001167684.1:320
282	PITX2	NM_205010.1	GCCTGGGAGCCGGGAATAATAAGCTGTGCTCCTCCTCACCTTCCTCCTCCTCCTCCTCGTCCTCCTGCCATCACCAGCAGCCCGCGCTGGCCATGGCGAC	88	88	N/A	PITX2	300002256;200002256	NM_205010.1:110
283	POUV	NM_001110178.1	TCTGCCAGGATGCGCCAACCTCAGAGGAGCTGGAGCAGTTTGCCAAGGACCTCAAGCACAAGCGCATCATGCTGGGCTTCACTCAGGCTGACGTGGGGCT	88	88	N/A	POUV	300002219;200002219	NM_001110178.1:220
284	PPARGC1A	NM_001006457.1	ACCCGAAAAGATCTGAGGGACCGGTTTGAAGTTTTTGGTGAAATCGAGGAGTGCACAGTAAATTTGCGGGATGATGGAGACAGCTATGGTTTCATCACCT	81	82	N/A	PPARGC1A	395263;295263	NM_001006457.1:2055
285	PRDM14	ENSGALT00000036696.1	GGAGGCTGCGAGACGGCGGGGCAGAGCCGCAGGTTCCACTTCAGCGAGGAGGAGCTGAACGCGGTGCTGTACGGGGCGCTTCGTAGCCCTCAGCTGCCCG	89	87	N/A	PRDM14	300002435;200002435	ENSGALT00000036696.1:177
286	PSIP1	NM_001031610.2	CAGGGTGGATGAAGTTCCTGATGGAGCAGTAAAACCTCCAACAAATAAAATGCCTATTTTCTTCTTTGGCACCCATGAGACGGCGTTTTTGGGACCAAAG	84	77	N/A	PSIP1	346110;246110	NM_001031610.2:85
287	PTCH2	XM_422426.2	GGCCATGATGGCGGTGGAACTGTTTGGCATTATGGGGCTGATGGGCATCAAGCTGAGTGCCATCCCTGTGGTCATCCTCATCGCTTCAGTTGGCATCGGC	86	86	N/A	PTCH2	346452;246452	XM_422426.2:1250
288	PTRF	NM_001001471.1	GAGATTGAAGAGATTATTGAGGAGTCACGGGCAGAGCGCATCAAAAGGAGCGGCATGAAGAGAGTGGATGACTTTAAGAAGGCATTCTCGAAGGAAAAAA	86	83	N/A	PTRF	300002193;200002193	NM_001001471.1:720
289	PTTG1	NM_001277741.1	CCTATGAGCATAACTTGTTCACCTGTAAAGCTTGAAGAGATGCCATGGGAGTCTGACTTGCTACAATTACCTACTGACTTAATGTCTACGCTGGATGACA	83	81	N/A	PTTG1	300002230;200002230	NM_001277741.1:670
290	PUF60	NM_001031380.1	TGTACGACCAGGAGAGATTTGATAACAGCGACCTGTCAGCATGAACTCTACAGGAAGGACTTGGCCCCTGTCCCCTCTGCCTGTCTGTTTTTTTAGCCAT	85	82	N/A	PUF60	300002211;200002211	NM_001031380.1:2130
291	RARB	NM_205326.1	CCTTGAAGAACCAATGAAAGTGGATAAGCTTCAGGAACCGTTGCTTGAAGCGCTGAAAATCTATATCCGAAAGAGACGACCCAACAAGCCTCACATGTTT	82	81	N/A	RARB	346342;246342	NM_205326.1:1465
292	RASSF7	XM_004941476.1	CTGAGCACGGACGTACCTCGGCCCCGGGAGCCGAGGAAATCAATGACCTTCAACTTGGGCCCCATGGGCTCTGTCGACCCGTATGCAAAGAGCCGCTGGA	88	87	N/A	RASSF7	300002305;200002305	XM_004941476.1:410
293	RFX2	XM_418212.2	AAGAAGGTGTGTACAGTGTACATCTTTCCCTCTTACTGTTCCGTGCTGGTGTCTGTCAGGGTGATGTCTGTCTGTAAATGTCTCCTATCACAGTAGCAAG	79	81	N/A	RFX2	346410;246410	XM_418212.2:3420
294	RFX3	XM_003642990.2	TACAGAGATATGAATACCTCAGTCCAGATTCTATGATGCGCAGCACGTGGTTGCCAAACCAGCTCTGAAGTCTGTTGTCAGTGCTCTGGAGAGGTTTAGC	83	84	N/A	RFX3	300002282;200002282	XM_003642990.2:5340
295	RFX4	XM_416306.2	GGCTAAATGAAAATGACTGGTATCGGTGAAGCCCGTATTCTTAACAGAGCTGTACAAACTTGATAGTATGTGGGACTTCACATGGACATTCCTGAAGGGA	82	83	N/A	RFX4	346391;246391	XM_416306.2:2345
296	RIPPLYA3	XM_004934542.1	AACTTTCCAGTACAAGCCACTATTCACTTCTACAATGATGACACTGACTCTGAAGAAGATGAGGAAGAAACCAGTTCAGCCTAGTAATTAACAATTGCAA	80	81	N/A	RIPPLY3	394900;294900	XM_004934542.1:780
297	RNF14	NM_001030623.2	TGATTCGGGAGATCCTGGACTTCGATCAGGCTCAGAGAAGGAAGTGCTTTAACAGTAAGATGTACTTGTGCAATATTTGCTTCTGTGAGAAGCTGGGCAC	85	81	N/A	RNF14	300002203;200002203	NM_001030623.2:740
298	RREB1	NM_205049.1	TATCCATAAGCAGCTTCCCAGAGATCCCACTGGAAAGCCTTTCATTCAGAACAACCCTTCAATTCCAGCAGGCTTCCACGACTTGGGATTCACAGACTTC	82	83	N/A	RREB1	346329;246329	NM_205049.1:1110
299	RUNX1T1	NM_204744.1	CACCATAGAGGCGACTCCTCGCTAAAACTGAACTCAAAACTCGAAAACAAAAACACAACACAAAATGAAACCAATTCCTCATCCTCAGATGCGCAAAGAT	85	82	N/A	RUNX1T1	300002244;200002244	NM_204744.1:1790
300	RUNX2	NM_204128.1	AGCCAAGAAGGCACAGACAGAAGCTTGATGACTCTAAACCTAGTTTGTTCCCTGAACGCCTCAGTGATTTAGGGCGCATTCCTCATCCCAGTATGAGAGT	84	83	N/A	RUNX2	399638;299638	NM_204128.1:595
301	RUNX3	XM_001232977.3	GCTGAATTCATGCCCTTACGGCCCGCAACGCCTCCTGCCAAATCTGTTGGTAGCTCATCAGCAGTCAGTTCTAATTGCACTACCGCGTAGAGACGGGAGC	86	86	N/A	RUNX3	300002272;200002272	XM_001232977.3:2820
302	SALL1	NM_204707.1	CCAGTATCGGTCCTAATCAGAACTCTTCGGTCATGCCTGCTAATTCACTGTCATCACTCATAAAGACAGAGGTTAACGGCTTCGTGCACAGCTCCTCTCA	79	83	N/A	SALL1	346118;246118	NM_204707.1:3615
303	SALL3	NM_204647.1	ACTTTCCTATGACGAGAAGAACATTGACACGCTGAGCAACTTCGATGATGACATTGATGAAAATTCTATGGAAGAGGACCCGGAGTTAAAGGACATGGCA	81	84	N/A	SALL3	346306;246306	NM_204647.1:2420
304	SAMD4A	XM_004936485.1	TTGTCCTCATCCCATTGGGGCCGGGCTGTAGCCTATGCAAATATAAAAAGCACCCCTTGGGATGGATGGGACCGACGGCTTAATTGTAAAAACCAAAATC	84	85	N/A	SAMD4A	300002292;200002292	XM_004936485.1:2430
305	SCML2	XM_004934693.1	AGAAAAAAGTCTTACCGGAGCAACTGATTCCTGCACCACCTTCTCCTCTTTCTTCTCCTGATGGGGACAGTGGCACTACGCAGATACTTAAAGATGGAAT	83	86	N/A	SCML2	300002288;200002288	XM_004934693.1:1090
306	SETD1B	NM_001030661.1	ACCGGGAGGACATCACTATGTTCATAACTCTCCTGGTGTTTTCCGTGGGACAGAGCATCAGTTCAGTACGTTCAAATCCCATCAGCAGGAGCCAGTTCAG	82	81	N/A	SETD1B	300002205;200002205	NM_001030661.1:1120
307	SIN3A	XM_004943705.1	CCACACCATCCCTGCAGAACAATCAGCCCGTCGAGTTTAATCACGCCATCAACTATGTCAACAAGATCAAGAACCGCTTCCAGGGACAGCCAGACATCTA	84	87	N/A	SIN3A	300002308;200002308	XM_004943705.1:900
308	SIX1	NM_001044685.1	TCCTAAAGGGAGCTCGTGGACACGGACTCTCGGTTGTACATAGCGGACGGTGATCCTGAACGTGACTTCGGCTCTTCTCCACGGTCTCAGCTCCAGGTCCGG	83	82	N/A	SIX1	310016;210016	NM_001044685.1:990
309	SIX2	NM_001044695.1	CGTAGGGTGCGCGGCGGGGCAGGGCTCACCATGTCGATGCTCCCGACTTTTGGCTTCACCCAAGAGCAAGTGGCTTGCGTCTGCGAGGTGCTCCAGCAAG	85	85	N/A	SIX2	394884;294884	NM_001044695.1:32
310	SIX3	NM_204364.1	GTTTCCAGTTTGACAGAAAGAGCCGAGACGGGCACCTCCATCCTTTCGGTAACCTCCAGCGACTCGGAATGTGATGTATGATATCGGAAAACAAACAAAC	83	84	N/A	SIX3	330695;230695	NM_204364.1:1071
311	SMAD1	NM_001201455.1	ATAATCAGGAGTTCGCTCAGCTCTTAGCACAGTCGGTGAACCATGGCTTTGAGACGGTGTATGAGCTTACCAAGATGTGCACTCTCCGCATGAGTTTTGT	81	81	N/A	SMAD1	300002226;200002226	NM_001201455.1:1150
312	SMAD2	NM_204561.1	AAAAGCGGTTAAAAGCTTGGTCAAGAAGCTAAAGAAAACAGGACAGCTGGATGAGCTTGAGAAGGCCATTACCACTCAGAACTGCAATACGAAGTGTGTG	86	85	N/A	SMAD2	346298;246298	NM_204561.1:280
313	SMAD7	XM_427238.2	TGGCAGCAGCCCAGTGTTCATCCTGTACCATCCAGTCCGTAAAATACAATGGCTTTCATGCCAGCGTGTCGTCTGGGTTGCTCCACGGGTCCATGTCTTT	83	82	N/A	SMAD7	346473;246473	XM_427238.2:2115
314	SMARCA2	NM_205139.1	ATCGTGGATTATTAAGGATGATGCTGAAGTTGAAAGGCTCACGTGTGAAGAAGAGGAAGAAAAGATATTTGGAAGAGGATCCCGTCAACGTAGGGATGTG	80	84	N/A	SMARCA2	346332;246332	NM_205139.1:3830
315	SMARCD1	XM_003643118.2	GTCAGGTGTAAGAGAAGAACCTCTCTCAGCCTAGATCTCAGTATTTCTGCTTGGAACTGCAATGCAAATGGACTGTAATGCAAAGTTGGTCACGTTCTCT	82	81	N/A	SMARCD1	300002283;200002283	XM_003643118.2:2530
316	SNAI1	NM_205142.1	GGACCGTACGCAGCCACAAGATCTACACGCTCCTCATCCTGTGCTCCTGTGCAACCTCAAGGCCTAATCCTGCACCCATCTGGACATCTTTGGGTCGAGGG	81	82	N/A	SNAI1	310033;210033	NM_205142.1:880
317	SNAI2 (Slug)	XM_419196.2	AGTCCCATTAGCGATGAAGAAGAGAGAATCCAGTCCAAGCTTTCAGACCCTCATGCCATCGAAGCTGAAAAGTTTCAGTGCGGTTTATGCAACAAGACCT	85	80	N/A	SNAI2	394891;294891	XM_419196.2:446
318	SOX1_1	NM_204333.1	CAAAACCATCGCCGCTGACACCCAAAGTTCGGGCGGGGCCAACTTTCGGGCTGCGCTTCGCCCCGCACCGCCTCACTGCAAACGGAGCCGACGGGGAGCG	89	88	N/A	SOX1	300002443;200002443	NM_204333.1:1809
319	SOX1_2	NM_204333.1	TTTTATCTAGGCGTGGCGAGGGAACCCAGACTGTACATAGTTTACTAAAAAGCCTTTCTGCTAAACAGAAACCCGAAGGATGCGTTCCATTTTGAGTTAA	80	77	N/A	SOX1	346287;246287	NM_204333.1:2210
320	SOX10	NM_204792.1	CTTTCTTGACCCCGGCTATCGTTGGCTCACCCGCCTACAGAAAGGTTTTTCGTCCTTTCGCCCTGTACCGATTTCACGCAGGCCACACAACTGGCTTGCA	79	82	N/A	SOX10	310028;210028	NM_204792.1:1685
321	SOX11	NM_205187.1	GGGCCGGGCGCAACCATTGGCGTTGCCGGGAGTGATGTCACCCATATGAAACGCTGATAACGCGTCGGGTGCGGAGCCGCGAGTTTTGCAGAAGGGGCAG	86	86	N/A	SOX11	346334;246334	NM_205187.1:30
322	SOX13	XM_003642722.2	CAATTAAAGGGGAGGGGCTGCCCGGGTGCTGCTTTCTCCTCGCTTGCTTCTGGTGCAGCCACTGTCCCTGTAGAGGGACGCCTCAAATGAAGGAAGGGAC	87	89	N/A	SOX13	300002281;200002281	XM_003642722.2:150
323	SOX2_1	NM_205188.1	CTCGTCTCATTCGAGGGCTCCTTGCCAAGCCGGGGACCTTCGGGACATGATCAGCATGTATCTACCAGGTGCTGAAGTACCAGAACCAGCTGCCCCAAGC	88	88	N/A	SOX2	300002442;200002442	NM_205188.1:1022
324	SOX2_2	NM_205188.1	AGGAAAACCAAGACCCTGATGAAGAAGGATAAGTACACGTTGCCAGGGGGCTTACTGGCGCCGGGCACCAATACCATGACGACCGGGGTAGGGGTTGGGG	84	85	N/A	SOX2	310051;210051	NM_205188.1:591
325	SOX3_1	NM_204195.1	CTGCAGGGCAGCAGGTTGCACAGTGTGCACCAGCACTACCAGAGTGCCGGGACTGCCGTGAACGGCACCGTACCACTAACTCACATATAAACGAACTGGC	88	88	N/A	SOX3	300002466;200002466	NM_204195.1:1051
326	SOX3_2	NM_204195.1	CTTCCCACCTTGCCGAGCGCCGCTCGGTTCGTGTCCGCAATTCGTAGAGTTTTTAACTTTAGGGTTTTGTTCCTACGGAAAGGGGGCGGTGGGAGAGAGC	82	82	N/A	SOX3	394888;294888	NM_204195.1:1548
327	SOX4	NM_204484.1	TGTTGGATTCTCTCAGTGGTGGGTTAATAGAGCATGTTACCTGTCTGTCTTTAAGGTTTTTGTCGGACCGTGGAACAGTTTCAGAACGTAGCGTTAGGGC	78	78	N/A	SOX4	346169;246169	NM_204484.1:1668
328	SOX9	NM_204281.1	GTGCCGCTTTCTCGCATGAATCTCCTAGACCCCTTCATGAAAATGACAGAAGAACAGGACAAATGCATTTCTGACGCCCCCAGCCCCACCATGTCGGATG	78	85	N/A	SOX9	310056;210056	NM_204281.1:101
329	SPDEF	XM_425831.3	ACCTTAAAATCATCCAGCTGCATCCTCCCTGCTGTGAGCAACAACCAAATGTGGGTTGTTTTTAGTTTGCATGCAGATGGTGCAGCGGGCAGCCCAGCCC	85	84	N/A	SPDEF	300002359;200002359	XM_425831.3:30
330	SPRED1	NM_001199709.1	TTTGGCGAGCCGAAGGGAATCTTCTTTCACGTAAGAGATGCTGGATGTGGAAGAAGCAACAAGACTTGTCAGACCTTGGCATTTTACAAGTGCTAGCCAC	82	83	N/A	SPRED1	300002225;200002225	NM_001199709.1:1330
331	SPRY1	NM_001097524.1	ATCCAGACGCAACCCAAGCAGTCGTCGTTGATTGTAGATGATCTGAAGGGTCCTTTGAAAGAGGACTTGACACAGCACAAGTTTATCTGCGAACAGTGTG	83	81	N/A	SPRY1	394885;294885	NM_001097524.1:459
332	SPRY2	NM_204800.1	AGGGCTGGATTTATTTGCAAACCGCAGGAAGAAGAAAATACAACAGAGAGAGGGGTTTGGTGCAGCGCCGCGATCACGGATTTCAGATGTGTTCTAAGCC	84	84	N/A	SPRY2	394889;294889	NM_204800.1:26
333	SSTR5	NM_001024834.1	GATTAAAGTCAAATCTTCAGGGATTCGTGTTGGGTCTACAAGGCGCAGGAGGTCAGAGAGGAAGGTGACCAGAATGGTGGTGATCATTGTGGTCGTCTTT	80	83	N/A	SSTR5	330690;230690	NM_001024834.1:656
334	ST18	XM_004939854.1	CAATGAGTGCCTGTCAGAAACCACGGAAATGTCAGTTGAACTGGACAAAGCAAAAGGGAACTTGAGTTTGCTAGAAGAAGCAATAGCTCTGCAGGCAGAG	85	86	N/A	ST18	300002300;200002300	XM_004939854.1:1220
335	STOX1	XM_003641470.2	CTCGTCTAATAAAAATGAGGGCTGGCACAGTGCATTCGGGTCACCCATGAGGAACTGCATTTGACCTGAAAATCCCTGAAGGCGTCTCCTTCTCGAGCCA	85	85	N/A	STOX1	300002278;200002278	XM_003641470.2:11590
336	BRACHYURY (T)	NM_204940.1	AATGACGTGTAGGATTTGTCACCCAATGGCGCATTGAACAACATGGGTGTCAGAAGTTAAATTATTGTGAGGGGGAAAGCTATAGTCCCCGATAGCTGAA	82	81	N/A	T	300002251;200002251	NM_204940.1:2360
337	TADA3	XM_414389.4	CAAGATCCAGGAGTACGAGTTCCAGGATGATCCCATTGATGTGCCACGGATTCCTAAAAACGATGCTCCGAACAGGTTCTGGGCGTCAGTGGAGCCGTAC	85	86	N/A	TADA3	300002327;200002327	XM_414389.4:410
338	TBL1XR1	NM_001031369.1	TCCCTAGATTGGAATAGCGAAGGTACACTTCTAGCAACTGGGTCTTACGATGGCTTTGCAAGGATATGGACTAAAGATGGTAATCTTGCCAGCACCTTAG	83	83	N/A	TBL1XR1	346109;246109	NM_001031369.1:845
339	TBPL2	NM_001098853.1	CAAGGAGGGCTCGATGGATCGGTACCAAGAAATGAGGACAGTGGGATCTTCATGGAGGAAAGCAGCTCGTCGTACCCACATGCAACCCAGCCAAGCCCAG	88	87	N/A	TBPL2	300002218;200002218	NM_001098853.1:270
340	TBX1	XM_001234619.1	ACCTTCCAGGTGAAGATATTCGGCATGGACCCCATGGCTGACTACATGCTCCTCATGGATTTCGTCCCCGTAGACGACAAGCGCTACCGGCAAGTACCCC	85	85	N/A	TBX1	346089;246089	XM_001234619.1:1071
341	TBX6L	AB193180.1	GATGGAAGGGCTTTTGCATGCTTCAGGACATCAGACCTGCTTTTGAACTGGACTATTTTGGCTCCCTTATTGAGAACTCTGGTGGCTCTCTCGGCTGTGC	82	83	N/A	TBX6L	300002188;200002188	AB193180.1:10
342	TCF12	NM_205375.2	GAATAGTAAAATCCTAAATTCACCGTGGCAGGTAGTGTGATGACATAGCCACCAGTAAGGTGGGCTTACTTACCTAATGGAATATAAGAGCAATGGTCAC	81	84	N/A	TCF12	346345;246345	NM_205375.2:2935
343	TCF1 (TCF7)	NM_204547.1	GTATAAAGGATCTGCGTACTCTGGCTACCCCTTCCTCATGCTCTCAGACCCCTACCTGCCAAATGGATCTATGTCACCTCTGTCCAACAAAGTTCCTGTC	86	83	N/A	TCF7	300002238;200002238	NM_204547.1:290
344	TCF7L1 (TCF3)	XM_003643906.2	TGGTGCAGCACGCGCCCCACATGCACCCATTGACGCCGCTCATCACCTACAGCAATGACCACTTCTCGCCCGGCTCACCGCCTGCGCACCTCTCACCCGA	88	88	N/A	TCF7L1	300002286;200002286	XM_003643906.2:250
345	TCF7L2 (TCF4)	NM_001206510.2	ACCCTCCTCCACACTTACCAGCCGACGTAGATCCAAAAACAGGAATTCCAAGACCTCCACATCCTCCAGACATATCTCCTTATTATCCCCTATCACCAGG	86	82	N/A	TCF7L2	300002227;200002227	NM_001206510.2:610
346	TFAP2A	NM_205094.1	AGCTAGAGATTTTGGGTACGTTTGTGAGACAGAATTTCCTGCCAAAGCAGTAGCTGAATTTCTCAACCGACAACATTCCGATCCAAACGAGCAAGTCACA	79	80	N/A	TFAP2A	310032;210032	NM_205094.1:990
347	TFAP2C	XM_003642494.2	CAAAACATACATGAACACAGGCGACCAGAGCCCTGCAGAAACCAACAAAACCATCGATAAAATGGACAAGCACAGGAAGTAAAGGGGAACAAACAGACTC	89	88	N/A	TFAP2C	300002280;200002280	XM_003642494.2:1430
348	TFAP2E	XM_417778.3	CGCAGAGCAAAATCAAAAAACGGGGGTCGGTGTTTAAGGGAAAGGTTAGAGAAAATCGGCCTCAATCTACCTGCAGGACGGCGCAAAGCTGCCAACGTCA	83	87	N/A	TFAP2E	300002334;200002334	XM_417778.3:850
349	TFCP2L1	XM_422087.4	GTACTGTATATCTAGCATAGCTGCTTGTGTATATGACTCAGAGAGGTGAATCTGACCTGATGAGAGCAATTTGAAAGGCAGATTGGAGTTGATAGGAAGA	80	84	N/A	TFCP2L1	300002348;200002348	XM_422087.4:4430
350	TGIF1	NM_205379.1	GAAAAGTAAAAAAGGTGTAGTTGCAATATCAGGCAGTGAAACAGAGGATGATGACACTATGGATGTCCCACTAGATCTTTCCTCATCTGCTGGCTCGGGC	82	86	N/A	TGIF1	300002267;200002267	NM_205379.1:250
351	THRA	NM_205313.1	CTGACGGGGACAAAGTGGACCTGGAGGCGTTCAGCGAGTTTACAAAAATCATCACGCCGGCCATCACCCGCGTGGTCGACTTTGCCAAAAAACTGCCCAT	85	85	N/A	THRA	346341;246341	NM_205313.1:895
352	THRB	NM_205447.1	CAAATAGAGCCAGCCTACATGGAGGCTCTTCAATGTCACGAAGCATTTAAAGACTTATTTCCAAAGGCCTGTCTCACAGTACCTCCAAAAGCCCTAGACA	81	82	N/A	THRB	382692;282692	NM_205447.1:1590
353	TLE1	XM_003643037.2	CTACTCATTCACCACGTGAAAATGGTATAGATAAAAGCCGCCTACTGAAGAAAGATGCCTCTAGCAGTCCCGCATCTACAGCCTCTTCAGGAAGTTCCAC	81	86	N/A	TLE1	300002379;200002379	XM_003643037.2:940
354	TOX	NM_001031025.1	TTCCAATTCGCTCTCTGTGATGCAAGATTTACGGAATACAGAAGGAGCCCAGTATAGTTCCCATCCTCAGATGGCAACCATGAGGCCAAGGGTTCAACCT	81	86	N/A	TOX	300002207;200002207	NM_001031025.1:570
355	TOX2	XM_004946975.1	CGTGTCAGCCTATGCCCTGTTTTTCAGAGACACACAAGCTGCTATCAAAGGGCAAAACCCCAATGCTACCTTCGGAGACGTGTCAAAAATTGTTGCATCT	81	82	N/A	TOX2	300002315;200002315	XM_004946975.1:620
356	TP53	NM_205264.1	GAGGATTATGGGGGGGACTTCGACTTCCGGGTGGGGTTCGTGGAGGCGGGCACAGCCAAATCGGTCACCTGCACTTACTCCCCGGTGCTGAATAAGGTCT	85	83	N/A	TP53	310052;210052	NM_205264.1:318
357	TP53BP2	XM_419394.4	GCAATCTGCTTGGGCTGTACCCAAGGATTAAGCCTAGACAAAGAAGCTTGGCATGAAGTAGCAGGGATGCCAGATTCTTGAAGTACTTGCTAATCGTGGA	86	83	N/A	TP53BP2	300002342;200002342	XM_419394.4:3510
358	TRIM3	XM_422922.4	GAGAGCGAGGTGCAGGACAACAAGAACGGGACCTACGAGCTGCTCTACACGCCGCGCGCCGAGGGCGACTTCCAGCTGTCCATCGCGCTGTACGGGCAGC	89	88	N/A	TRIM3	300002351;200002351	XM_422922.4:1300
359	TRIM9	XM_421468.4	GCGCCGCAGCCATACGCCGTGCAGCTCCTTGGAGGCGAGCATTTATTTTTGTAGAGCCTTAAATACTGCCCGATAGCATCCTTCCCTTGGCAGGAAAACT	83	85	N/A	TRIM9	300002347;200002347	XM_421468.4:2340
360	TRNAU1AP	XR_213607.1	GAAGCAGACGCTGCCGTCCCCATCCGTAGCGGAGGGAGCAGAATGGAACGTGTGCCTGCGCCTCTGCGGCTCCGCCTGGCACACCTTCTTTGGCAGCTTA	87	88	N/A	TRNAU1AP	300002367;200002367	XR_213607.1:870
361	TSHZ3	XM_414125.3	GAGACAAGTGACCGCATGGCAGACTTTGAGAGCAGTTCTATTAAAAATGAAGAAGAGAGCAAGGAGGTTTCAATACCACTTGAAGACTCTACCGTATCTG	82	83	N/A	TSHZ3	300002324;200002324	XM_414125.3:300
362	UBII (UBB)	ENSGALT00000039524.1	CTTGACTGGCAAGACCATCACCCTCGAGGTTGAGCCCAGTGACACAATTGAAAATGTGAAGGCCAAGATCCAAGACAAAGAAGGCATTCCTCCCGATCAG	87	86	N/A	UBB	300002441;200002441	ENSGALT00000039524.1:503
363	VGLL1	XM_004940683.1	TGAAGACAGCTACAAATCTCATTACCTCCAGTGGTGCGTTGCCAACTTCAGCCGTGCCAGCGCTGCCCTTCCCTCTGACTTTGTTTGCGTCAATAGAGCA	82	84	N/A	VGLL1	300002303;200002303	XM_004940683.1:4020
364	VGLL2	NM_001145990.1	CAGACAACGGGACTTAAAACAACCTGGCTTTGCAAGGATGATCCTTTAGACTTATTTTGGAGAGGAAAACCCTTCTGTTGAGAGAGGAGAGCCAAAGACC	83	84	N/A	VGLL2	300002221;200002221	NM_001145990.1:990
365	ZBTB1	XM_001234834.1	AGATGAGTAAACACGCAGTAATCTTCACAGGGCACAGTGTGCACCATGTTCTGGATCTGTACCTTGAAAAAGCTGGTTTGAAGAAGAGAATCAGGCATTC	84	81	N/A	ZBTB1	346363;246363	XM_001234834.1:2510
366	ZBTB46	XM_004947124.1	ACCAGGCCACGGTCACCCACTTAGACATTGTCACTGCACAAGGCTTTAAGGCAATCATTGACTTCATGTATTCTGCACACCTAGCGCTGACCAGCAGGAA	86	84	N/A	ZBTB46	300002316;200002316	XM_004947124.1:660
367	ZEB1	NM_205131.1	GTTTTTAGTGGTGGTAGCCCGTTGCAGGCAACCAGTTCTCCTCAGGGTGTGGTGCAAGCTGTTGTTCTGCCAACAGTGGGTCTGGTGTCTCCCATAAGCA	81	86	N/A	ZEB1	300002259;200002259	NM_205131.1:1130
368	ZFHX3	XM_414230.4	AATGAAGACTCTATGGATGCAATGGAGCTTCTGACTCCAACCAGTTCCTCCTGCAGCACACCAATGCCCTCACAAGCTTATAGCACGCCTACATCTTCAG	85	86	N/A	ZFHX3	300002326;200002326	XM_414230.4:7140
369	ZFP1	ENSGALT00000000466.1	AAAGCTACAAAAGCAATGGTGATCTGAAGTATCATGAGCGCAGCCACACAGGAGAGAGACCTTATAAGTGTCCTCAGTGCGGCAAGTGCTTCAAAAACAG	86	85	N/A	ZFP1	300002453;200002453	ENSGALT00000000466.1:1095
370	ZFPM2	XM_418380.4	AAAATGCCGGAAGCTGTAAGTCCCAGTAATGGTCAGAGCTCTATAAGCATCCTGAATACAGCTCCTCACGCATCAGATCCAGAGAATCAGCTTCTGCAGA	84	86	N/A	ZFPM2	300002338;200002338	XM_418380.4:1970
371	ZIC1	NM_204254.1	CTGCTCTGTTCCAAGGCTTGGTAGGCGAAGGGGTTAGTAGGATGCATAAGAAGACAAGGTTACCAGGGCAAATGCCAACCGTGTAGGGCTGTACTGGAAA	81	82	N/A	ZIC1	310021;210021	NM_204254.1:1855
372	ZIC4	XM_422698.2	AAGGCTGAACATTTCACTCCAGTGCCAGCCTCCAGGACAGAGCCTTTTGCTGCTTCTTCGCTTCATAGCTACGGTGGCATGAACCTGAACGTGAACCTGG	84	85	N/A	ZIC4	346455;246455	XM_422698.2:750
373	ZMYM3	XM_004940633.1	CAGCGGGAGAACAAGATGAACCCGCTTCGATGCCCCGTCAAGTTCTATGAGTTTTATCTCTCTAAATGTCCTGAGAGCATGCGGAACCGCAGCGACATCT	86	81	N/A	ZMYM3	300002302;200002302	XM_004940633.1:3920
374	ZMYND11	XM_004939164.1	ATGGTATGCATCCAAAAGAAACCACTCGTCAGCTGAGTTTAGCAGTCAAGGATGGTCTTATTGTTGAAACCTTGACGGTGGGGTGTAAAGGGTCAAAGGC	81	83	N/A	ZMYND11	300002298;200002298	XM_004939164.1:320
375	ZNF131	XM_429143.4	CTAGCAAGTATCGTCAGGGAGAGCGAAAATGCCAGATCCAAGAAAAAGTTGACAGTGCAGCTGATCCTTCATGCAAACAGGTAGAAGGTATTGAAATTGT	83	81	N/A	ZNF131	300002365;200002365	XM_429143.4:770
376	ZNF185	ENSGALT00000012104.1	TCTTCTAAGGCGGCACAGAAAAACACTGCCGTGAAGGGACCCAGTTCATGCCACTCTTCTGGCTACAGGATGACAACTGAGGATTACAAGAAATTAGCTC	88	84	N/A	ZNF185	300002432;200002432	ENSGALT00000012104.1:339
377	ZNF277	NM_001195469.1	TCAGTCTAAAGGAGGACTGATAAGTCATATGGAAGAGACAAAACACATTACATTCCTGCCAGCCAGGTCTACCTGGGACCAACCACAGTATTATTTTCCT	82	82	N/A	ZNF277	300002371;200002371	NM_001195469.1:1060
378	ZNF367	XM_425046.4	TATGATAAGTAGAACTCTTGAGAAGCTGCAGAGAGTGGCCAATGAAATTGAGCAGGCCACAGGTCAAAAGGTGAAGGTTATACAAGCTGATTTCACTAGA	83	85	N/A	ZNF367	300002358;200002358	XM_425046.4:400
379	ZNF385C	XM_004948613.1	AGCTGTCCCACGCCAAAGAGCCGTCGGCCGCGGTGGTCACATCCTCACTCTGAGAGCAATAGGCAAAGCCTGGGACTCGCTCCTCTGCCCTCTGAAAGCA	88	89	N/A	ZNF385C	300002320;200002320	XM_004948613.1:1760
380	ZNF414	XM_004948755.1	CAACGCCGTCTGGAAGAAGAGCCAAGGTGTGAGTGTCAGCCCACTCCTCCCATGCTTTGGCTCAGGAGTGACTCCAGGGCACTCCTCCAACAGCCGCATC	88	88	N/A	ZNF414	300002321;200002321	XM_004948755.1:1220
381	ZNF469	XM_004944286.1	TTGATCCCAAAGGCCTTCCTGCTCACTACGATGCCAATCTCTTCTCAAAGCCACCACCCTTGGGACCCTCGCACATGGAGGATATGTATTTATGCCAAGA	82	86	N/A	ZNF469	300002310;200002310	XM_004944286.1:5170
382	ZNF507	XM_414126.2	ACAGATGTGATGTATGTGACTACACCAGCACAACTTACGTTGGCGTACGAAATCACAGACGAATCCATAACTCTGATAAGCCATACAGGTGTTCTCTCTG	83	81	N/A	ZNF507	346373;246373	XM_414126.2:2415
383	ZNF516	XM_419095.2	TTCCTTGTGAAGTCTGTGGCCAGGCCTTCAGTCAGACCTGGTTCCTGAAAGCTCACATGAAAAAGCATAGGGGCTCATTTGATCACGGCTGCCACATTTG	84	83	N/A	ZNF516	346418;246418	XM_419095.2:790
384	ZNF518B	XM_420787.4	AACAAGGACCCAAAAATAAGGTAAAACAAGTGGGTTACAGGGAGCTTCCAAAGAGAAAAACAAGAACACAGTCGGAAACCAGTTCAGGTTCTGACATGTC	86	83	N/A	ZNF518B	300002345;200002345	XM_420787.4:3000
385	ZNF521	XM_004939809.1	AACAGCCCATCATTGGTAACTGTTGGCTACACCTCAGTCTCAAGTACCACTCCAGATTCCAATCTCTCTGTGGATAGTTCAACAATGGTGGAAACGGCTC	85	82	N/A	ZNF521	300002299;200002299	XM_004939809.1:1060
386	ZNF821	XM_004944355.1	ATTCATCCACTGCAAGACCGCGATTTCAGCAGCAGTGGCAGTGATGATGAGGAAACCACCCACGATGAAGTTTCTTCCCATACTTCAGAGGAGGATGGCT	84	86	N/A	ZNF821	300002311;200002311	XM_004944355.1:300
