# Supplementary material for: A gene regulatory network for neural induction
Source: eLife. 2023 Mar 3;12:e73189. doi: 10.7554/eLife.73189 (PMC10038663; doi:10.7554/eLife.73189)
Supplement: Figure 2—source data 1. [file elife-73189-fig2-data1.xlsx]

## Sheet: Suppl Table S14
Supplementary Table S14. ChIPseq tissue dissociation
Samples	EGKXII Epiblast	5h Node induced and uninduced	12h Node induced and uninduced
		9h Node induced and uninduced
		HH6-7 neural plate
Pipette X times, followed by 15min rest on ice	15	30	30
Repeat pipetting and resting step Y more times	4	4	5
Total	60	120	150
