# Supplementary material for: A gene regulatory network for neural induction
Source: eLife. 2023 Mar 3;12:e73189. doi: 10.7554/eLife.73189 (PMC10038663; doi:10.7554/eLife.73189)
Supplement: Figure 3—source data 1. [file elife-73189-fig3-data1.xlsx]

## Sheet: GRN Expression profile
Supplemental Table. integrated NI gene expression profile
ensembl ID galGal5	name_in_NI_GRN	name_in_scRNAseq	Ensembl Name/ID galGal6	first_expressed_time_point	Exprs_0H	Exprs_1H	Exprs_3H	Exprs_5H	Exprs_7H	Exprs_9H	Exprs_12H	chr galGal5	start galGal5	end galGal5	gene_size
ENSGALG00000028095	HOXA1	HOXA1		0	UP	-	-	Down	Down	Down	Down	2	32634687	32636037	1351
ENSGALG00000043935	AFF1			0	UP	-	Down	Down	Down	-	-	4	46064418	46096688	32271
ENSGALG00000035016	ID2	ID2		0	UP	-	Down	Down	Down	Down	-	3	96269601	96271725	2125
ENSGALG00000015828	BACH1	BACH1		0	UP	-	Down	Down	Down	Down	Down	1	104102311	104115468	13158
ENSGALG00000034983	CDX2	CDX2		0	UP	-	Down	Down	Down	Down	Down	1	176067482	176070939	3458
ENSGALG00000029921	CSRP2	CSRP2		0	UP	-	Down	Down	Down	Down	Down	1	38237619	38245641	8023
ENSGALG00000009129	DLX5	DLX5		0	UP	-	Down	Down	Down	Down	Down	2	24479855	24482255	2401
ENSGALG00000016947	ELF1	ELF1		0	UP	-	Down	Down	Down	Down	Down	1	165748040	165834895	86856
ENSGALG00000016059	ETS2	ETS2		0	UP	-	Down	Down	Down	Down	Down	1	107802242	107815381	13140
ENSGALG00000038495	GRHL1	GRHL1		0	UP	-	Down	Down	Down	Down	Down	3	96863016	96899127	36112
ENSGALG00000037687	GRHL2	GRHL2	ENSGALG00000037687	0	UP	-	Down	Down	Down	Down	Down	2	129435467	129485773	50307
ENSGALG00000004249	GRHL3	GRHL3		0	UP	-	Down	Down	Down	Down	Down	23	5719947	5741312	21366
ENSGALG00000033416	HIC2	HIC2		0	UP	-	Down	Down	Down	Down	Down	15	227290	359589	132300
ENSGALG00000010005	HIF2A	EPAS1	EPAS1	0	UP	-	Down	Down	Down	Down	Down	3	26625939	26701895	75957
ENSGALG00000016927	KLF5	KLF5		0	UP	-	Down	Down	Down	Down	Down	1	156077320	156094516	17197
ENSGALG00000037787	MEF2D	MEF2D		0	UP	-	Down	Down	Down	Down	Down	25	1557866	1620174	62309
ENSGALG00000033631	MYC	MYC		0	UP	-	Down	Down	Down	Down	Down	2	139845724	139849615	3892
ENSGALG00000027772	NANOG	NANOG		0	UP	-	Down	Down	Down	Down	Down	1	75915830	75918614	2785
ENSGALG00000012211	PDLIM5	PDLIM5		0	UP	-	Down	Down	Down	Down	Down	4	58569545	58695921	126377
ENSGALG00000042492	PITX2	PITX2		0	UP	-	Down	Down	Down	Down	Down	4	58157161	58171834	14674
ENSGALG00000044251	RASSF7	RASSF7		0	UP	-	Down	Down	Down	Down	Down	5	15892435	15899025	6591
ENSGALG00000036043	TBX3	no expression		0	UP	-	Down	Down	Down	Down	Down	15	12277733	12287707	9975
ENSGALG00000012775	TFAP2A	TFAP2A		0	UP	-	Down	Down	Down	Down	Down	2	63495554	63509044	13491
ENSGALG00000006412	VGLL1	VGLL1		0	UP	-	Down	Down	Down	Down	Down	4	4375986	4381807	5822
ENSGALG00000009645	ESRRG			0	UP	Down	Down	Down	Down	Down	-	3	19997178	20358337	361160
ENSGALG00000005909	GATA2	GATA2		0	UP	Down	Down	Down	Down	Down	Down	12	9198667	9214691	16025
ENSGALG00000035317	ID3	ID3		0	UP	Down	Down	Down	Down	Down	Down	23	2211791	2213069	1279
ENSGALG00000015013	MSX1	MSX1		0	UP	Down	Down	Down	Down	Down	Down	4	79398825	79401315	2491
ENSGALG00000008014	CEBPB	CEBPB		1	-	UP	-	-	-	Down	Down	20	13926766	13928100	1335
ENSGALG00000033178	KLF6	KLF6		1	-	UP	-	-	-	Down	Down	2	11799037	11808009	8973
ENSGALG00000015388	BLIMP1	ENSGALG00000015388	PRDM1	1	-	UP	UP	-	-	-	-	3	68510621	68531230	20610
ENSGALG00000014297	IRF7	IRF7		1	-	UP	UP	-	-	Down	Down	5	15845876	15849344	3469
ENSGALG00000025887	ATF3	ATF3		1	-	UP	UP	UP	-	Down	Down	3	21874341	21876244	1904
ENSGALG00000035504	ETV1	ETV1		1	-	UP	UP	UP	UP	-	-	2	27328221	27392291	64071
ENSGALG00000015681	NRIP1	NRIP1		1	-	UP	UP	UP	UP	-	-	1	98322193	98325661	3469
ENSGALG00000033091	RUNX1T1	RUNX1T1		1	-	UP	UP	UP	UP	-	-	2	125596520	125702636	106117
ENSGALG00000007690	TFAP2C	TFAP2C		1	-	UP	UP	UP	UP	-	Down	20	12148971	12156390	7420
ENSGALG00000008018	SNAI1	SNAI1		1	-	UP	UP	UP	UP	UP	-	20	14008761	14012151	3391
NM_001080874	ERNI	ERNI		1	-	UP	UP	UP	UP	UP	Down	5	53685989	53689626	3638
ENSGALG00000007555	CCND1	CCND1		1	-	UP	UP	UP	UP	UP	UP	5	17525969	17539612	13644
ENSGALG00000041454	DNMT3A	DNMT3A	Dnmt3a	1	-	UP	UP	UP	UP	UP	UP	3	105053764	105065491	11728
ENSGALG00000014930	ENC1	Z-ENC1		1	-	UP	UP	UP	UP	UP	UP	Z	24273767	24275537	1771
ENSGALG00000005768	ETV5	ETV5		1	-	UP	UP	UP	UP	UP	UP	9	5114527	5123909	9383
ENSGALG00000026761	LIN28B	LIN28B		1	-	UP	UP	UP	UP	UP	UP	3	69096719	69176650	79932
ENSGALG00000008653	MGA	ENSGALG00000008653		1	-	UP	UP	UP	UP	UP	UP	5	24995616	25023029	27414
ENSGALG00000034889	OTX2	OTX2		1	-	UP	UP	UP	UP	UP	UP	5	55922635	55929314	6680
ENSGALG00000033439	PRDM14	PRDM14		1	-	UP	UP	UP	UP	UP	UP	2	116911618	116916354	4737
ENSGALG00000036497	SOX4	SOX4		1	-	UP	UP	UP	UP	UP	UP	2	59096906	59098672	1767
ENSGALG00000014795	TGIF1	TGIF1		1	-	UP	UP	UP	UP	UP	UP	2	101084413	101092939	8527
ENSGALG00000012823	TRIM24	TRIM24		1	-	UP	UP	UP	UP	UP	UP	1	56435002	56493091	58090
ENSGALG00000015451	ZNF462	Z-ZNF462	ENSGALG00000015451	1	-	UP	UP	UP	UP	UP	UP	Z	55489589	55547342	57754
ENSGALG00000010030	BAZ1A	BAZ1A	ENSGALG00000010030	3 (excluded in GRN)	-	-	UP	-	-	-	-	5	36011116	36043588	32473
ENSGALG00000027365	HIVEP3	HIVEP3		3	-	-	UP	-	-	-	-	23	863800	918759	54960
ENSGALG00000030991	IRX1	IRX1		3	-	-	UP	-	-	-	-	2	87405529	87410670	5142
ENSGALG00000013193	IRX2	IRX2		3	-	-	UP	-	-	-	-	2	86903335	86907419	4085
ENSGALG00000011278	KAT2B	KAT2B		3	-	-	UP	-	-	-	-	2	35988107	36027652	39546
ENSGALG00000004397	MLXIP	MLXIP		3	-	-	UP	-	-	-	-	15	5796665	5813999	17335
ENSGALG00000013956	MYB	MYB		3	-	-	UP	-	-	-	-	3	55871890	55897055	25166
ENSGALG00000010179	RFX3	Z-RFX3		3	-	-	UP	-	-	-	-	Z	26672762	26773738	100977
ENSGALG00000010646	STOX2	STOX2		3	-	-	UP	-	-	-	-	4	39895977	39956315	60339
ENSGALG00000006480	TCF7	TCF7		3	-	-	UP	-	-	-	-	13	16006865	16064664	57800
ENSGALG00000026534	ZNF469	ENSGALG00000026534		3	-	-	UP	-	-	-	-	11	18575204	18577421	2218
ENSGALG00000039238	SALL1	SALL1		3	-	-	UP	-	-	UP	UP	11	6043785	6062292	18508
ENSGALG00000003096	CBFA2T2	CBFA2T2		3	-	-	UP	-	UP	UP	-	20	2284255	2334193	49939
ENSGALG00000038200	GATAD2B	GATAD2B		3 (excluded in GRN)	-	-	UP	-	UP	UP	-	AADN04000896.1	9516	40496	30981
ENSGALG00000043827	ZHX2	ZHX2		3	-	-	UP	-	UP	UP	UP	2	137987771	137990264	2494
ENSGALG00000037778	NAB1	NAB1		3	-	-	UP	UP	-	-	Down	7	59839	77654	17816
ENSGALG00000005653	NFKB2	NFKB2		3	-	-	UP	UP	-	Down	Down	6	16936050	16944525	8476
ENSGALG00000000678	CITED4	CITED4		3	-	-	UP	UP	UP	-	-	23	1422977	1425194	2218
ENSGALG00000043085	RNF14	RNF14		3	-	-	UP	UP	UP	-	-	13	17254743	17261627	6885
ENSGALG00000013818	CITED2	CITED2		3	-	-	UP	UP	UP	-	UP	3	54137559	54139018	1460
ENSGALG00000026471	CRIP2	CRIP2		3 (excluded in GRN)	-	-	UP	UP	UP	UP	-	8	4011575	4021435	9861
ENSGALG00000036678	ETV4	ETV4		3	-	-	UP	UP	UP	UP	-	27	3550455	3562778	12324
ENSGALG00000026264	MAFA	MAFA		3	-	-	UP	UP	UP	UP	-	2	148778574	148780708	2135
ENSGALG00000033926	CBX1	CBX1		3	-	-	UP	UP	UP	UP	UP	27	4168579	4176543	7965
ENSGALG00000023338	CBX2	CBX2		3	-	-	UP	UP	UP	UP	UP	18	9721861	9733527	11667
ENSGALG00000040833	CDCA7	CDCA7	ENSGALG00000040833	3	-	-	UP	UP	UP	UP	UP	7	17398532	17406361	7830
ENSGALG00000025743	CDR2	CDR2		3	-	-	UP	UP	UP	UP	UP	14	8741730	8754600	12871
ENSGALG00000033678	EHMT1	EHMT1		3	-	-	UP	UP	UP	UP	UP	17	2485449	2582436	96988
ENSGALG00000027247	EOMES	EOMES		3	-	-	UP	UP	UP	UP	UP	2	38739415	38744142	4728
ENSGALG00000043399	EZH2	EZH2		3	-	-	UP	UP	UP	UP	UP	2	54453670	54500690	47021
ENSGALG00000013342	GBX2	GBX2		3	-	-	UP	UP	UP	UP	UP	7	5187306	5190674	3369
ENSGALG00000035031	HEY1	HEY1		3	-	-	UP	UP	UP	UP	UP	2	121291568	121294409	2842
ENSGALG00000011870	HIF1A	HIF1A		3	-	-	UP	UP	UP	UP	UP	5	54055990	54086580	30591
ENSGALG00000030396	HMGA1	HMGA1		3	-	-	UP	UP	UP	UP	UP	26	4415933	4417701	1769
ENSGALG00000006317	ING5	ING5		3	-	-	UP	UP	UP	UP	UP	9	4759612	4816518	56907
ENSGALG00000010074	KDM4A	ENSGALG00000010074	ENSGALG00000010074	3	-	-	UP	UP	UP	UP	UP	8	20229799	20245185	15387
ENSGALG00000039118	MEIS2	MEIS2		3	-	-	UP	UP	UP	UP	UP	5	31240856	31409344	168489
ENSGALG00000002803	MTA1	MTA1		3	-	-	UP	UP	UP	UP	UP	8	4026900	4093219	66320
ENSGALG00000024047	MYCL1	MYCL	MYCL	3	-	-	UP	UP	UP	UP	UP	23	5548133	5550962	2830
ENSGALG00000016462	MYCN	MYCN		3	-	-	UP	UP	UP	UP	UP	3	99664877	99667310	2434
ENSGALG00000039872	PDLIM4	PDLIM4		3	-	-	UP	UP	UP	UP	UP	13	16875246	16905638	30393
ENSGALG00000001845	PHTF1	PHTF1		3	-	-	UP	UP	UP	UP	UP	26	3719994	3729665	9672
ENSGALG00000042051	SETD2	SETD2		3	-	-	UP	UP	UP	UP	UP	2	3915870	3953545	37676
ENSGALG00000040383	SOX3	SOX3	ENSGALG00000054923	3	-	-	UP	UP	UP	UP	UP	4	10557675	10558846	1172
ENSGALG00000039182	TBL1XR1	TBL1XR1		3	-	-	UP	UP	UP	UP	UP	9	17991353	18078753	87401
ENSGALG00000001093	TCF7L1	TCF3		3	-	-	UP	UP	UP	UP	UP	28	2386329	2441061	54733
ENSGALG00000029135	YEATS4	YEATS4		3	-	-	UP	UP	UP	UP	UP	1	35425913	35432184	6272
ENSGALG00000011718	ZBTB1	ZBTB1		3	-	-	UP	UP	UP	UP	UP	5	52971777	52983605	11829
ENSGALG00000031144	ZIC3	ZIC3		3	-	-	UP	UP	UP	UP	UP	4	4574009	4576392	2384
ENSGALG00000009454	ZNF277	ZNF277		3	-	-	UP	UP	UP	UP	UP	1	26968440	27022185	53746
ENSGALG00000004304	TCF12			3	-	-	UP	UP	UP	UP	UP	10	7045145	7516317	471173
ENSGALG00000016397	SOX11	SOX11	ENSGALG00000016397	5	-	-	-	UP	-	UP	UP	3	94937211	94939190	1980
ENSGALG00000028015	HES1	HES1		5	-	-	-	UP	-	UP	UP	9	12963816	12974386	10571
ENSGALG00000002971	NSD1	NSD1	ENSGALG00000002971	5	-	-	-	UP	-	UP	UP	13	10206725	10259504	52780
ENSGALG00000000583	SOX13	SOX13		5	-	-	-	UP	-	UP	UP	26	1683808	1703852	20045
ENSGALG00000006424	PHF15	JADE2	JADE2	5	-	-	-	UP	UP	-	-	13	15859408	15899407	40000
ENSGALG00000041790	SAMD4A	SAMD4A		5	-	-	-	UP	UP	Down	Down	5	56498665	56564359	65695
ENSGALG00000041267	BMI1	BMI1		5	-	-	-	UP	UP	UP	UP	2	17748561	17758699	10139
ENSGALG00000003304	CRTC1	CRTC1		5	-	-	-	UP	UP	UP	UP	28	3825549	3857837	32289
ENSGALG00000041461	DNMT3B	DNMT3B		5	-	-	-	UP	UP	UP	UP	20	10452241	10464723	12483
ENSGALG00000030889	FOXA2	FOXA2		5	-	-	-	UP	UP	UP	UP	3	3365541	3369041	3501
ENSGALG00000005757	IRF8	IRF8		5	-	-	-	UP	UP	UP	UP	11	17821800	17827332	5533
ENSGALG00000045555	IVNS1ABP	ENSGALG00000045555		5	-	-	-	UP	UP	UP	UP	8	10398505	10414923	16419
ENSGALG00000008303	LHX5	LHX5		5	-	-	-	UP	UP	UP	UP	15	12639427	12644631	5205
ENSGALG00000034076	PBX4	PBX4		5 (excluded in GRN)	-	-	-	UP	UP	UP	UP	AADN04000744.1	40160	49650	9491
ENSGALG00000001644	SIN3A	SIN3A		5	-	-	-	UP	UP	UP	UP	10	2590069	2610361	20293
ENSGALG00000029247	SMARCD1	SMARCD1		5	-	-	-	UP	UP	UP	UP	33	296753	327900	31148
ENSGALG00000015705	WHSC1	NSD2	ENSGALG00000015705	5	-	-	-	UP	UP	UP	UP	4	83802146	83861078	58933
ENSGALG00000041083	ZIC2	ZIC2		5	-	-	-	UP	UP	UP	UP	1	144281220	144285013	3794
ENSGALG00000003891	ZNF423	ZNF423		5	-	-	-	UP	UP	UP	UP	11	6819993	7018204	198212
ENSGALG00000013660	ZNF516	ZNF516		5	-	-	-	UP	UP	UP	UP	2	91127585	91184075	56491
ENSGALG00000015112	ZNF521	ZNF521		5	-	-	-	UP	UP	UP	UP	2	103906762	104138860	232099
ENSGALG00000011814	ATF7IP	ATF7IP		7	-	-	-	-	UP	UP	UP	1	48864005	48924443	60439
ENSGALG00000037646	BRD8	BRD8		7	-	-	-	-	UP	UP	UP	13	10065288	10080015	14728
ENSGALG00000037457	FOXI3	ENSGALG00000037457	ENSGALG00000037457	7	-	-	-	-	UP	UP	UP	4	86624886	86627842	2957
ENSGALG00000008939	FUBP1	FUBP1		7	-	-	-	-	UP	UP	UP	8	18948063	18971002	22940
ENSGALG00000005506	HESX1	HESX1		7	-	-	-	-	UP	UP	UP	12	8600980	8639123	38144
ENSGALG00000001101	MBD3	MBD3		7	-	-	-	-	UP	UP	UP	28	2453801	2470213	16413
ENSGALG00000038504	MID1	MID1		7	-	-	-	-	UP	UP	UP	1	124632217	124725073	92857
ENSGALG00000001506	PTTG1	PTTG2		7	-	-	-	-	UP	UP	UP	13	7818157	7832434	14278
ENSGALG00000043460	SOX2	SOX2		7	-	-	-	-	UP	UP	UP	9	16918110	16919468	1359
ENSGALG00000039454	SP4	SP4		7	-	-	-	-	UP	UP	UP	2	30491274	30515206	23933
ENSGALG00000008883	TCF7L2	TCF7L2		7	-	-	-	-	UP	UP	UP	6	27067492	27239223	171732
ENSGALG00000000817	ZNF821	ZNF821		7	-	-	-	-	UP	UP	UP	11	19972950	19984338	11389
ENSGALG00000034648	E2F2	(no expression in scRNAseq)	ENSGALG00000051375	7	-	Down	-	-	UP	UP	-	23	2198441	2198958	518
ENSGALG00000030377	MDFI	MDFI		7	UP	-	Down	-	UP	UP	UP	26	4904775	4905638	864
ENSGALG00000009875	HMGA2	HMGA2		9	-	-	-	-	-	UP	UP	1	34203986	34308540	104555
ENSGALG00000036022	LIN28A	LIN28A		9	-	-	-	-	-	UP	UP	23	175669	186981	11313
ENSGALG00000035679	LMO1	LMO1		9	-	-	-	-	-	UP	UP	5	10128269	10140533	12265
ENSGALG00000040582	LMX1B	LMX1B		9	-	-	-	-	-	UP	UP	17	10543137	10636808	93672
ENSGALG00000008700	PDCD4	PDCD4		9	-	-	-	-	-	UP	UP	6	26158227	26173945	15719
ENSGALG00000032259	SIX3	SIX3		9	-	-	-	-	-	UP	UP	3	25897936	25901177	3242
ENSGALG00000012218	CBY1	CBY1		12	-	-	-	-	-	-	UP	1	50881481	50883895	2415
ENSGALG00000012680	E2F3	E2F3		12	-	-	-	-	-	-	UP	2	59627688	59669274	41587
ENSGALG00000007184	FEZF2	FEZF2		12	-	-	-	-	-	-	UP	12	13165723	13167630	1908
ENSGALG00000011630	GLI2	GLI2		12	-	-	-	-	-	-	UP	7	25930782	26109391	178610
ENSGALG00000013454	HOXB1	HOXB1		12	-	-	-	-	-	-	UP	27	3648587	4003342	354756
ENSGALG00000017199	MAML2	MAML2		12	-	-	-	-	-	-	UP	1	184996597	185204663	208067
ENSGALG00000041626	MEIS1	MEIS1		12	-	-	-	-	-	-	UP	3	10483926	10577709	93784
ENSGALG00000010500	NKX6-2	NKX6-2		12	-	-	-	-	-	-	UP	6	35311071	35313308	2238
ENSGALG00000036001	SMAD2	Z-SMAD2Z		12	-	-	-	-	-	-	UP	Z	1515764	1555787	40024
ENSGALG00000011489	T	T	TBXT	12	-	-	-	-	-	-	UP	3	43074401	43082303	7903
ENSGALG00000040465	ZEB2	ZEB2		12	-	-	-	-	-	-	UP	7	33480905	33588820	107916
ENSGALG00000029401	SIX1	SIX1		12	-	-	Down	-	-	-	UP	5	54487606	54490069	2464
ENSGALG00000012792	HIPK2	HIPK2		Down-regulated	-	-	-	-	-	-	Down	1	56075643	56198466	122824
ENSGALG00000000318	CSRP1	CSRP1		Down-regulated	-	-	-	-	-	Down	-	26	499823	772333	272511
ENSGALG00000005422	PDLIM1	PDLIM1		Down-regulated	-	-	-	-	Down	Down	Down	6	16449297	16486297	37001
ENSGALG00000006688	TADA3	TADA3		Down-regulated	-	-	-	-	Down	Down	Down	12	11503035	11506041	3007
ENSGALG00000035104	HAND1	(no expression in scRNAseq)		Down-regulated	-	-	-	Down	Down	Down	Down	13	12134076	12135178	1103
ENSGALG00000005533	ZMYM3	ZMYM3		Down-regulated	-	-	Down	-	-	-	-	4	2297763	2327175	29413
ENSGALG00000006599	ZMYND11	ZMYND11		Down-regulated	-	-	Down	-	-	-	-	2	9883489	9946309	62821
ENSGALG00000040362	ZNF185	(no expression in scRNAseq)		Down-regulated	-	-	Down	-	-	-	-	4	11267560	11283066	15507
ENSGALG00000004532	ZNF507	ENSGALG00000004532		Down-regulated	-	-	Down	-	-	-	-	11	9891255	9904371	13117
ENSGALG00000033813	BTBD6	BTBD6		Down-regulated	-	-	Down	-	-	-	Down	5	52749256	52908313	159058
ENSGALG00000000713	ZFHX3	ZFHX3		Down-regulated	-	-	Down	-	-	-	Down	11	19692862	19834198	141337
ENSGALG00000012024	MKL1	MRTFA	MRTFA	Down-regulated	-	-	Down	-	-	Down	Down	1	50007128	50093845	86718
ENSGALG00000006062	ZBTB46	ZBTB46		Down-regulated	-	-	Down	-	Down	Down	Down	20	9775105	9805872	30768
ENSGALG00000011635	TFCP2L1	TFCP2L1		Down-regulated	-	-	Down	Down	-	Down	Down	7	26189843	26218128	28286
ENSGALG00000042851	PPARGC1A	PPARGC1A		Down-regulated	-	-	Down	Down	Down	-	-	4	74475026	74593998	118973
ENSGALG00000012799	RREB1	RREB1		Down-regulated	-	-	Down	Down	Down	Down	Down	2	64856785	64985116	128332
ENSGALG00000016537	SCML2	SCML2		Down-regulated	-	-	Down	Down	Down	Down	Down	1	120694800	120730607	35808
ENSGALG00000008308	BHLHE40	BHLHE40		Down-regulated	-	-	Down	Down	Down	Down	Down	12	18624948	18629296	4349
ENSGALG00000027905	CSRNP1	CSRNP1		Down-regulated	-	-	Down	Down	Down	Down	Down	2	5277137	5282741	5605
ENSGALG00000016920	LMO7	LMO7		Down-regulated	-	-	Down	Down	Down	Down	Down	1	154868241	154908783	40543
ENSGALG00000016890	MBNL2	MBNL2		Down-regulated	-	-	Down	Down	Down	Down	Down	1	145335207	145407071	71865
ENSGALG00000036017	NCOA2	ENSGALG00000036017		Down-regulated	-	-	Down	Down	Down	Down	Down	2	116927518	117004105	76588
ENSGALG00000010164	SMARCA2	Z-SMARCA2		Down-regulated	-	-	Down	Down	Down	Down	Down	Z	26328237	26435687	107451
ENSGALG00000034004	TRIM3	TRIM3		Down-regulated	-	-	Down	Down	Down	Down	Down	1	194432358	194438661	6304
ENSGALG00000041404	SALL3	SALL3		Down-regulated (excluded in GRN)	-	Down	Down	-	-	-	-	2	57106918	57126307	19390
ENSGALG00000016531	ASXL2	ASXL2		Excluded in GRN	-	-	-	-	-	-	-	3	105234655	105318244	83590
ENSGALG00000015196	ASXL3	ASXL3		Excluded in GRN	-	-	-	-	-	-	-	2	107248917	107350660	101744
ENSGALG00000034048	BCL11A	BCL11A		Excluded in GRN	-	-	-	-	-	-	-	3	1854197	1913151	58955
ENSGALG00000039595	BTBD11	BTBD11		Excluded in GRN	-	-	-	-	-	-	-	1	53427815	53497435	69621
ENSGALG00000026295	CDR2L	CDR2L		Excluded in GRN	-	-	-	-	-	-	-	18	10689815	10703975	14161
ENSGALG00000005679	CDX1	CDX1		Excluded in GRN	-	-	-	-	-	-	-	13	13232068	13242308	10241
ENSGALG00000037015	DACH1	DACH1		Excluded in GRN	-	-	-	-	-	-	-	1	156676088	157041790	365703
ENSGALG00000004508	EYA2	EYA2		Excluded in GRN	-	-	-	-	-	-	-	20	5843309	5951540	108232
ENSGALG00000007769	FOXP1	FOXP3		Excluded in GRN	-	-	-	-	-	-	-	12	15937308	16132890	195583
ENSGALG00000029270	GATA3	GATA3		Excluded in GRN	-	-	-	-	-	-	-	1	4402131	4591692	189562
ENSGALG00000007041	HDX	HDX		Excluded in GRN	-	-	-	-	-	-	-	4	8966506	9003532	37027
ENSGALG00000031560	KIAA2018	USF3	USF3	Excluded in GRN	-	-	-	-	-	-	-	1	79232532	79256355	23824
ENSGALG00000014485	LDB2	LDB2		Excluded in GRN	-	-	-	-	-	-	-	4	76744860	76951561	206702
ENSGALG00000015078	MLLT3	Z-MLLT3		Excluded in GRN	-	-	-	-	-	-	-	Z	34030582	34141800	111219
ENSGALG00000010869	MYSM1	MYSM1		Excluded in GRN	-	-	-	-	-	-	-	8	26417386	26429418	12033
ENSGALG00000008519	NR2C2	NR2C2		Excluded in GRN	-	-	-	-	-	-	-	12	19784605	19809996	25392
ENSGALG00000012123	PAX6	PAX6		Excluded in GRN	-	-	-	-	-	-	-	5	5201970	5218801	16832
ENSGALG00000001773	RFX2	RFX2		Excluded in GRN	-	-	-	-	-	-	-	28	1576434	1603526	27093
ENSGALG00000004324	SETD1B	SETD1B		Excluded in GRN	-	-	-	-	-	-	-	15	5682195	5723072	40878
ENSGALG00000030353	SOX1	SOX1		Excluded in GRN	-	-	-	-	-	-	-	1	139815683	139817990	2308
ENSGALG00000004386	SOX9	SOX9		Excluded in GRN	-	-	-	-	-	-	-	18	8866455	8869366	2912
ENSGALG00000031024	STOX1	(no expression in scRNAseq)	ENSGALG00000031024	Excluded in GRN	-	-	-	-	-	-	-	6	10758511	10781894	23384
ENSGALG00000003106	TOX2	ENSGALG00000003106		Excluded in GRN	-	-	-	-	-	-	-	20	2376244	2489922	113679
ENSGALG00000034649	TOX3	TOX3		Excluded in GRN	-	-	-	-	-	-	-	11	5324988	5446431	121444
ENSGALG00000012367	TRIM9	TRIM9		Excluded in GRN	-	-	-	-	-	-	-	5	58110006	58139997	29992
ENSGALG00000014917	VGLL2	VGLL2		Excluded in GRN	-	-	-	-	-	-	-	3	63207045	63212424	5380
ENSGALG00000040532	ZIC1	ZIC1		Excluded in GRN	-	-	-	-	-	-	-	9	11935071	11938586	3516
ENSGALG00000014859	ZNF131	no expression		Excluded in GRN	-	-	-	-	-	-	-	Z	13611246	13629494	18249
ENSGALG00000012629	ZNF367	Z-ZNF367		Excluded in GRN	-	-	-	-	-	-	-	Z	42166306	42170592	4287
ENSGALG00000003403	ZNF385C	ZNF385C		Excluded in GRN	-	-	-	-	-	-	-	27	5186132	5220676	34545
ENSGALG00000024378	ZNF414	ZNF414		Excluded in GRN	-	-	-	-	-	-	-	28	1734532	1739063	4532
ENSGALG00000002301	CNOT1			Excluded in GRN	-	-	-	-	-	-	-	11	1472261	1525501	53241
ENSGALG00000040266	GLI3			Excluded in GRN	-	-	-	-	-	-	-	2	50875913	51069730	193818

## Sheet: GRN RNAseq expression galGal5
Supplementary Table. NI gene expression from RNAseq (FPKM)
text colored blue: fpkm <10 cell colored green: FC >1.5 cell colored blue: FC<0.5
tracking_id	ensembl ID galGal5	gene_name_gal4	gene_short_name_gal5	chr galGal5	start galGal5	end galGal5	PS_cEpiblast	aAO	NP_Epiblast	nonNeural	Uninduced_0hrs	Uninduced_5hrs	Induced_5hrs	Uninduced_9hrs	Induced_9hrs	Uninduced_12hrs	Induced_12hrs	FC_PS	FC_0hrs	FC_5hrs	FC_9hrs	FC_12hrs	FC_NP
ENSGALG00000015388	ENSGALG00000015388	BLIMP1	-	3	68510621	68531230	6.15074	1.82993	5.8986	1.85299	1.84314	0.86728	6.24683	5.03779	8.82027	2.5581	6.51388	3.36119	1	7.20278	1.75082	2.54637	3.18329
ENSGALG00000034648	ENSGALG00000034648	E2F2	-	23	2198441	2198958	10.7988	8.30284	11.7132	4.27881	6.62502	4.30942	7.14615	3.47882	12.9968	3.96451	8.76092	1.30062	1	1.65826	3.73598	2.20984	2.73749
ENSGALG00000037457	ENSGALG00000037457	FOXI3	-	4	86624886	86627842	0.835179	3.453	18.2575	49.6017	6.52674	20.5809	30.2302	10.7052	40.4404	12.195	28.8131	0.241871	1	1.46885	3.77764	2.3627	0.368082
ENSGALG00000045555	ENSGALG00000045555	IVNS1ABP	-	8	10398505	10414923	113.811	65.5548	52.7218	63.1652	47.0106	25.0674	54.8841	22.1869	61.5937	26.5012	46.2113	1.73612	1	2.18946	2.77613	1.74374	0.834665
ENSGALG00000010074	ENSGALG00000010074	KDM4A	-	8	20229799	20245185	55.297	36.7275	90.8494	30.3496	40.4259	32.4914	55.8378	29.7059	74.4374	27.8818	62.7356	1.5056	1	1.71854	2.50581	2.25006	2.99343
ENSGALG00000008653	ENSGALG00000008653	MGA	-	5	24995616	25023029	12.1954	11.9682	14.9952	6.4756	17.57	14.0131	26.5144	10.4536	24.7015	9.66754	16.5087	1.01898	1	1.89212	2.36297	1.70764	2.31565
ENSGALG00000036017	ENSGALG00000036017	NCOA2	-	2	116927518	117004105	6.4006	4.5066	9.27697	15.3027	10.9419	16.4403	9.05159	18.7987	10.6321	23.0701	6.7217	1.42027	1.20884	0.550573	0.565576	0.29136	0.606231
ENSGALG00000031024	ENSGALG00000031024	STOX1	-	6	10758511	10781894	0.100694	0.416397	0.624333	0.260685	0	0.344426	0.655615	0.214385	0.907853	0.0866515	0.431928	0.241822	1	1.9035	4.23469	4.98466	2.39497
ENSGALG00000003106	ENSGALG00000003106	TOX2	-	20	2376244	2489922	10.493	2.18601	5.2602	10.3953	2.30305	2.25753	3.44694	5.71812	8.41236	3.87272	5.05999	4.80007	1	1.52686	1.47118	1.30657	0.506017
ENSGALG00000014859	ENSGALG00000014859	ZNF131	-	Z	13611246	13629494	0.0531849	0.0671732	0.0731534	0.0613342	0.0428197	0.059818	0.076589	0.0125113	0.0132473	0.0101282	0.0358363	0.791758	1	1.28037	1.05883	3.53827	1.1927
ENSGALG00000040362	ENSGALG00000040362	ZNF185	-	4	11267560	11283066	0.160138	0.414006	0.132541	0.137986	0.394785	0	0.149427	0	0	0	0.19765	0.386801	1	0.149427	0	0.19765	0.960539
ENSGALG00000026534	ENSGALG00000026534	ZNF469	-	11	18575204	18577421	0.582363	0.0617282	0.184914	0.219459	0.32541	0.126309	2.90576	0.601406	0.971908	0.486714	0.254089	9.43431	1	23.0052	1.61606	0.52205	0.84259
ENSGALG00000004532	ENSGALG00000004532	ZNF507	-	11	9891255	9904371	0.785595	1.08958	1.3822	0.724013	1.29988	1.74626	1.45522	1.24824	1.64627	0.992616	1.80721	0.721007	1	0.833335	1.31887	1.82065	1.90908
ENSGALG00000043935	ENSGALG00000043935		AFF1	4	46064418	46096688	14.1651	9.58398	11.2861	13.1924	13.7912	15.1103	8.98067	10.6583	9.96089	11.5082	8.88266	1.478	1.53565	0.594341	0.934566	0.771855	0.8555
ENSGALG00000016531	ENSGALG00000016531		ASXL2	3	105234655	105318244	4.40719	4.57116	4.64985	3.68457	5.90151	8.81442	6.19035	9.28502	6.22403	8.21777	4.02841	0.964129	1	0.702298	0.67033	0.490207	1.26198
ENSGALG00000015196	ENSGALG00000015196		ASXL3	2	107248917	107350660	1.60686	1.45974	2.71395	1.44718	1.23636	1.10918	2.43528	0.887809	2.40454	1.14242	2.29076	1.10079	1	2.19557	2.7084	2.00518	1.87534
ENSGALG00000025887	ENSGALG00000025887		ATF3	3	21874341	21876244	8.04025	18.3218	0.554431	14.5658	11.3612	26.4253	72.8959	237.358	91.7204	94.6424	26.7946	0.438835	1	2.75856	0.386422	0.283114	0.0380639
ENSGALG00000011814	ENSGALG00000011814		ATF7IP	1	48864005	48924443	21.0244	20.7165	23.4632	12.001	19.5218	17.5375	16.0687	8.95506	21.7915	11.1134	17.5618	1.01486	1.2149	0.916248	2.43343	1.58024	1.9551
ENSGALG00000015828	ENSGALG00000015828		BACH1	1	104102311	104115468	5.94498	9.70806	15.3765	22.7062	26.0495	49.8097	16.5115	74.175	20.9291	74.5569	21.3921	0.612376	1.57766	0.331492	0.282158	0.286923	0.677194
ENSGALG00000010030	ENSGALG00000010030		BAZ1A	5	36011116	36043588	0.298691	1.06999	0.525865	0.327212	0.946065	0.739219	1.92953	2.38937	1.68166	2.18452	1.82771	0.279153	1	2.61023	0.703809	0.836664	1.60711
ENSGALG00000034048	ENSGALG00000034048		BCL11A	3	1854197	1913151	8.99376	10.706	2.31913	0.718124	3.44492	1.97483	7.23188	1.80305	4.62267	0.495585	2.32719	0.840067	1	3.66203	2.56381	4.69584	3.22943
ENSGALG00000008308	ENSGALG00000008308		BHLHE40	12	18624948	18629296	2.13654	3.69887	0.954511	1.5808	2.79704	4.80111	0.979302	53.434	8.15305	41.3418	7.10122	0.57762	1	0.203974	0.152582	0.171769	0.603815
ENSGALG00000041267	ENSGALG00000041267		BMI1	2	17748561	17758699	63.4225	41.5493	37.0034	8.83162	27.7867	12.3423	28.685	10.5677	36.0315	8.15802	26.5802	1.52644	1	2.32412	3.40959	3.25817	4.18988
ENSGALG00000037646	ENSGALG00000037646		BRD8	13	10065288	10080015	42.5501	43.4451	42.7167	29.3683	32.8107	25.6238	30.7514	16.5934	32.2313	18.4006	28.8695	0.979399	1	1.20011	1.94242	1.56894	1.45452
ENSGALG00000039595	ENSGALG00000039595		BTBD11	1	53427815	53497435	3.84915	10.5774	3.12898	1.95072	3.14227	2.74427	2.43246	2.40708	3.14439	1.46736	4.24797	0.363903	1	0.886378	1.30631	2.89497	1.60401
ENSGALG00000033813	ENSGALG00000033813		BTBD6	5	52749256	52908313	131.998	47.9491	13.4901	150.663	77.3766	171.838	165.743	135.8	146.465	127.364	46.9558	2.75288	0.466847	0.964531	1.07853	0.368674	0.0895382
ENSGALG00000003096	ENSGALG00000003096		CBFA2T2	20	2284255	2334193	9.16707	7.62705	9.01656	3.43297	4.60967	2.7447	8.52669	3.33285	10.2149	2.04413	7.64532	1.20192	1	3.1066	3.06491	3.74013	2.62646
ENSGALG00000033926	ENSGALG00000033926		CBX1	27	4168579	4176543	240.862	175.833	260.953	132.423	142.994	124.095	195.841	94.747	213.642	82.0299	219.014	1.36983	1	1.57815	2.25487	2.66993	1.9706
ENSGALG00000023338	ENSGALG00000023338		CBX2	18	9721861	9733527	25.103	15.9839	36.1411	8.74051	12.2437	7.96649	26.3234	8.23887	29.0067	6.96562	28.0779	1.57052	1	3.30427	3.52071	4.03093	4.1349
ENSGALG00000012218	ENSGALG00000012218		CBY1	1	50881481	50883895	26.4005	22.7001	33.6091	20.8288	18.86	17.3663	14.2426	11.6736	15.6423	11.7056	25.4874	1.16301	1.3242	0.820129	1.33997	2.17737	1.61359
ENSGALG00000007555	ENSGALG00000007555		CCND1	5	17525969	17539612	51.5947	88.692	93.5517	8.2659	40.7613	33.1398	137.629	27.2721	81.1824	17.4519	86.7469	0.581729	1	4.15298	2.97676	4.97063	11.3178
ENSGALG00000040833	ENSGALG00000040833		CDCA7	7	17398532	17406361	81.0125	85.5768	80.0398	25.0495	48.2587	27.01	58.4735	18.2195	49.5068	19.0554	49.3973	0.946664	1	2.16488	2.71724	2.5923	3.19527
ENSGALG00000025743	ENSGALG00000025743		CDR2	14	8741730	8754600	12.1416	9.49685	21.2289	4.6711	6.97078	6.54808	18.553	6.37811	13.4844	6.59667	17.5705	1.27849	1	2.83335	2.11417	2.66354	4.54473
ENSGALG00000026295	ENSGALG00000026295		CDR2L	18	10689815	10703975	4.64344	1.25406	8.32457	2.88344	1.529	1.30602	4.11186	1.38637	5.71413	1.92288	4.83078	3.70273	1	3.14839	4.12165	2.51226	2.88703
ENSGALG00000005679	ENSGALG00000005679		CDX1	13	13232068	13242308	0.208936	0.175438	0.150917	1.58066	0.853284	0.662369	0.266158	2.13092	1.17207	2.88934	7.86887	1.19094	1	0.401827	0.55003	2.72341	0.0954772
ENSGALG00000034983	ENSGALG00000034983		CDX2	1	176067482	176070939	1.33473	60.6516	0.312294	44.9853	52.8389	57.0296	5.07487	119.929	7.84552	145.686	23.9964	0.0220065	10.4119	0.0889866	0.065418	0.164713	0.00694213
ENSGALG00000008014	ENSGALG00000008014		CEBPB	20	13926766	13928100	2.44922	9.99906	0.445001	4.55018	5.23247	6.64894	3.3169	94.7052	21.7381	80.6159	12.6501	0.244945	1	0.498861	0.229534	0.156918	0.0977985
ENSGALG00000013818	ENSGALG00000013818		CITED2	3	54137559	54139018	7.07265	16.2288	13.8402	3.75814	4.64107	2.84775	9.96402	9.74908	10.8463	7.08207	11.922	0.435809	1	3.49891	1.11255	1.68341	3.68273
ENSGALG00000000678	ENSGALG00000000678		CITED4	23	1422977	1425194	60.0956	20.1545	43.1957	86.0013	35.407	28.8983	114.454	56.8062	74.0288	65.5394	55.738	2.98175	1	3.96058	1.30318	0.85045	0.502268
ENSGALG00000002301	ENSGALG00000002301	GNOT1	CNOT1	11	1472261	1525501	54.1106	87.5628	64.2746	42.7815	79.7112	73.337	60.4868	67.286	62.8661	62.7048	47.7121	0.617963	1.31783	0.824779	0.934312	0.7609	1.50239
ENSGALG00000026471	ENSGALG00000026471		CRIP2	8	4011575	4021435	46.127	18.4539	30.8471	13.6664	6.06101	4.3698	24.5004	8.7948	19.4255	8.64871	12.8672	2.49958	1	5.60676	2.20875	1.48776	2.25715
ENSGALG00000003304	ENSGALG00000003304		CRTC1	28	3825549	3857837	14.7577	13.7706	14.2927	7.24249	10.2388	8.43437	12.5124	7.39442	13.674	6.89406	11.8808	1.07168	1	1.4835	1.84923	1.72334	1.97345
ENSGALG00000027905	ENSGALG00000027905		CSRNP1	2	5277137	5282741	2.51509	2.23619	8.82574	21.6276	5.73729	11.0246	2.81147	18.3934	7.88954	22.3736	8.75091	1.12472	1	0.255018	0.428933	0.391127	0.408078
ENSGALG00000000318	ENSGALG00000000318		CSRP1	26	499823	772333	70.4841	61.0595	25.4769	37.621	30.1449	24.7436	24.0607	39.5508	14.9391	30.0519	15.8003	1.15435	1.25287	0.972401	0.377719	0.525767	0.677199
ENSGALG00000029921	ENSGALG00000029921		CSRP2	1	38237619	38245641	17.471	67.4195	6.32299	963.366	101.774	233.447	33.2227	434.78	24.0364	565.812	32.8204	0.259139	3.06339	0.142314	0.0552841	0.0580058	0.00656343
ENSGALG00000037015	ENSGALG00000037015		DACH1	1	156676088	157041790	1.65834	0.945015	11.2912	2.22819	1.98926	3.09443	3.50442	1.83989	8.14017	1.35604	7.80242	1.75483	1	1.13249	4.42427	5.75383	5.06743
ENSGALG00000009129	ENSGALG00000009129		DLX5	2	24479855	24482255	3.25087	11.5395	12.997	254.238	41.5599	50.0664	4.4494	54.0377	12.591	65.044	27.6522	0.281717	9.34056	0.08887	0.233004	0.425131	0.0511214
ENSGALG00000041454	ENSGALG00000041454		DNMT3A	3	105053764	105065491	562.265	215.268	200.484	39.7985	77.5419	46.1068	484.484	67.7076	325.664	51.8555	214.342	2.61193	1	10.5079	4.80986	4.13345	5.03748
ENSGALG00000041461	ENSGALG00000041461		DNMT3B	20	10452241	10464723	930.032	522.698	341.946	149.584	306.193	195.914	493.371	120.132	467.913	88.8157	357.52	1.77929	1	2.5183	3.89499	4.02541	2.28598
ENSGALG00000012680	ENSGALG00000012680		E2F3	2	59627688	59669274	10.0435	15.0151	14.7539	5.71253	13.3651	15.0565	19.4718	11.9579	16.5603	9.15764	14.1705	0.668893	1	1.29325	1.38488	1.5474	2.58273
ENSGALG00000033678	ENSGALG00000033678		EHMT1	17	2485449	2582436	31.2682	22.4915	53.4037	17.2789	17.6358	20.2723	33.4498	15.3385	46.2053	15.0377	41.2369	1.39022	1	1.65002	3.01237	2.74223	3.09069
ENSGALG00000016947	ENSGALG00000016947		ELF1	1	165748040	165834895	9.40994	17.7121	5.24719	17.3646	16.25	21.2997	8.4205	37.5522	7.78888	30.0761	5.32579	0.531272	1.92981	0.395334	0.207415	0.177077	0.302177
ENSGALG00000014930	ENSGALG00000014930		ENC1	Z	24273767	24275537	17.6044	7.79742	29.085	0.37002	2.33401	3.11072	41.1669	23.79	71.2009	11.1101	36.3797	2.25772	1	13.2339	2.99289	3.27447	78.6039
ENSGALG00000027247	ENSGALG00000027247		EOMES	2	38739415	38744142	58.5513	83.452	3.30641	1.40958	9.61788	12.1463	83.3216	5.11087	36.7651	4.05801	14.5984	0.701616	1	6.85983	7.19351	3.59743	2.34567
ENSGALG00000010005	ENSGALG00000010005	HIF2A	EPAS1	3	26625939	26701895	10.953	79.7832	0.997464	421.843	133.394	157.965	17.2769	237.086	6.33631	329.129	5.24363	0.137285	7.72095	0.109372	0.0267258	0.0159318	0.00236454
NM_001080874	NM_001080874		ERNI	5	53685989	53689626	69.4427	31.1104	0.993337	1.21907	8.90596	2.10151	51.6315	15.5216	26.861	15.1647	6.98253	2.23214	1	24.5688	1.73056	0.460446	0.814832
ENSGALG00000009645	ENSGALG00000009645	ESRRG	ESRRG	3	19997178	20358337	3.7413	8.9432	5.44601	15.7831	21.6687	31.3441	8.97811	19.4382	9.08329	14.3286	7.77221	0.41834	2.4135	0.286437	0.467291	0.542426	0.345053
ENSGALG00000016059	ENSGALG00000016059		ETS2	1	107802242	107815381	4.39776	32.9806	5.87139	37.0274	35.9973	72.8537	10.3333	93.411	10.0187	71.6666	8.44771	0.133344	3.48362	0.141836	0.107254	0.117875	0.158569
ENSGALG00000035504	ENSGALG00000035504		ETV1	2	27328221	27392291	11.4315	14.2843	7.62069	8.213	7.51785	7.31425	19.6193	8.79787	11.441	11.8591	10.0625	0.800284	1	2.68234	1.30043	0.848505	0.927881
ENSGALG00000036678	ENSGALG00000036678		ETV4	27	3550455	3562778	20.8949	3.81292	5.70002	0.138619	0.583338	0.0887767	26.3893	0.552809	12.8132	0.275268	9.05461	5.48003	1	297.255	23.1783	32.8938	41.12
ENSGALG00000005768	ENSGALG00000005768		ETV5	9	5114527	5123909	41.1148	23.5536	46.1722	11.9362	16.1724	13.3931	34.6683	9.25641	43.7524	6.97655	31.0456	1.74558	1	2.58852	4.72671	4.44999	3.86825
ENSGALG00000004508	ENSGALG00000004508		EYA2	20	5843309	5951540	0.701884	1.60227	0.853321	2.07435	0.815275	0.539393	1.37238	0.514081	1.60356	0.4415	3.45713	0.438056	1	2.5443	3.11927	7.83042	0.411368
ENSGALG00000043399	ENSGALG00000043399		EZH2	2	54453670	54500690	81.5002	68.9874	88.9718	29.7049	52.9519	35.3486	71.6916	23.4803	62.5865	21.5876	79.4527	1.18138	1	2.02813	2.66549	3.68048	2.99519
ENSGALG00000007184	ENSGALG00000007184		FEZF2	12	13165723	13167630	0.397901	0.0512423	19.9243	0.0856798	0	0	0	0	6.00115	0.496404	14.996	7.76509	1	0	6.00115	30.2093	232.544
ENSGALG00000030889	ENSGALG00000030889		FOXA2	3	3365541	3369041	9.93154	7.2284	1.2326	2.72153	3.57701	3.21334	14.3177	2.64917	16.1374	3.61952	10.6344	1.37396	1	4.45571	6.09149	2.93807	0.452907
ENSGALG00000007769	ENSGALG00000007769	FOXP1	FOXP3	12	15937308	16132890	3.62714	3.26187	4.64323	4.08865	5.63102	5.13497	7.5406	7.15844	6.47669	8.7823	5.00499	1.11198	1	1.46848	0.904763	0.569895	1.13564
ENSGALG00000008939	ENSGALG00000008939		FUBP1	8	18948063	18971002	200.309	215.651	243.657	157.659	182.705	163.993	185.632	106.086	200.683	112.305	252.019	0.928857	1	1.13195	1.8917	2.24406	1.54547
ENSGALG00000005909	ENSGALG00000005909		GATA2	12	9198667	9214691	11.9365	69.6902	1.36306	295.203	127.071	230.227	14.9905	291.2	30.78	251.685	19.3357	0.171279	8.47677	0.0651118	0.105701	0.076825	0.00461736
ENSGALG00000029270	ENSGALG00000029270		GATA3	1	4402131	4591692	0.182923	0.11343	0.589033	24.8871	0.842328	1.05324	0.542606	1.66802	2.95716	1.6009	5.00634	1.61265	1	0.515178	1.77286	3.1272	0.0236682
ENSGALG00000038200	ENSGALG00000038200		GATAD2B	AADN04000896.1	9516	40496	13.196	7.73224	15.6187	7.45782	6.55324	4.52609	8.74726	5.16143	11.675	4.88851	8.86803	1.70662	1	1.93263	2.26197	1.81406	2.09427
ENSGALG00000013342	ENSGALG00000013342		GBX2	7	5187306	5190674	8.27573	11.1517	38.8262	1.71119	1.54973	0.63733	13.5463	0.251965	37.4808	0.883463	68.6347	0.742105	1	21.2548	148.754	77.6883	22.6896
ENSGALG00000011630	ENSGALG00000011630		GLI2	7	25930782	26109391	1.84926	0.338829	23.0677	4.2263	0.61993	1.40024	2.96766	2.95388	9.14866	3.46444	10.108	5.4578	1	2.11939	3.09717	2.91764	5.45813
ENSGALG00000040266	ENSGALG00000040266	GLI3	GLI3	2	50875913	51069730	1.83963	1.30375	9.85298	1.20945	1.08093	1.5205	3.49826	1.75028	4.62616	1.98151	5.76692	1.41103	1	2.30073	2.6431	2.91037	8.14666
ENSGALG00000038495	ENSGALG00000038495		GRHL1	3	96863016	96899127	7.74628	24.4127	4.24846	19.5718	20.2988	24.2418	7.37431	33.4469	7.44277	31.1754	5.04259	0.317305	2.75264	0.304198	0.222525	0.161749	0.21707
ENSGALG00000037687	ENSGALG00000037687		GRHL2	2	129435467	129485773	5.97363	18.7893	4.5674	21.965	30.2661	47.5835	20.1368	51.732	20.1568	41.1527	11.9897	0.317927	1.50302	0.423189	0.389639	0.291347	0.20794
ENSGALG00000004249	ENSGALG00000004249		GRHL3	23	5719947	5741312	0.0523316	14.6395	0.216045	147.898	31.7019	116.73	2.03733	88.6286	2.15405	144.932	5.43112	0.00357468	15.5605	0.0174534	0.0243042	0.0374736	0.00146077
ENSGALG00000035104	ENSGALG00000035104		HAND1	13	12134076	12135178	2.96428	4.72497	0.357536	784.118	9.84576	47.1664	8.51163	159.056	5.57553	230.565	3.71862	0.627365	1	0.18046	0.0350539	0.0161283	0.000455972
ENSGALG00000007041	ENSGALG00000007041		HDX	4	8966506	9003532	2.20358	2.93644	4.99732	2.89815	2.54259	3.92009	3.91051	2.60487	3.51263	3.20228	5.02843	0.750426	1	0.997556	1.34849	1.57027	1.72431
ENSGALG00000028015	ENSGALG00000028015		HES1	9	12963816	12974386	85.1331	51.3895	30.3498	47.7412	15.0196	7.51318	14.7641	7.0607	32.6499	5.10095	55.5232	1.65662	1	1.96509	4.62417	10.8849	0.635715
ENSGALG00000005506	ENSGALG00000005506		HESX1	12	8600980	8639123	3.15801	2.15312	86.1595	2.178	0.671347	0.73637	6.66017	0.607115	35.8447	1.28804	109.259	1.46671	1	9.0446	59.041	84.8258	39.559
ENSGALG00000035031	ENSGALG00000035031		HEY1	2	121291568	121294409	10.4811	18.1989	15.5217	3.71058	9.64656	4.09846	16.6421	2.81857	17.8529	3.44236	20.2698	0.575919	1	4.06057	6.33403	5.88834	4.18309
ENSGALG00000033416	ENSGALG00000033416		HIC2	15	227290	359589	2.05576	7.19983	8.03353	32.4678	27.787	62.031	10.8345	55.5106	14.549	52.7295	15.5785	0.285529	2.56468	0.174663	0.262094	0.295442	0.247431
ENSGALG00000011870	ENSGALG00000011870		HIF1A	5	54055990	54086580	23.1125	22.9739	45.7168	27.6798	30.8342	21.1134	36.6504	24.8198	42.4232	22.2923	51.181	1.00603	1	1.73588	1.70925	2.2959	1.65163
ENSGALG00000012792	ENSGALG00000012792		HIPK2	1	56075643	56198466	12.381	12.1355	10.9842	16.6589	12.1899	11.2415	9.38643	18.6631	11.3477	24.1942	9.64803	1.02023	1.29867	0.83498	0.608029	0.398774	0.659359
ENSGALG00000027365	ENSGALG00000027365		HIVEP3	23	863800	918759	3.20864	0.731147	0.268176	0.0960738	0.148968	0.208089	3.12214	1.92452	2.33282	1.3959	0.698209	4.3885	1	15.0039	1.21216	0.500186	2.79135
ENSGALG00000030396	ENSGALG00000030396		HMGA1	26	4415933	4417701	784.099	485.069	647.063	201.735	184.24	150.567	540.821	243.556	754.024	228.497	833.219	1.61647	1	3.5919	3.0959	3.64652	3.20749
ENSGALG00000009875	ENSGALG00000009875		HMGA2	1	34203986	34308540	25.6556	43.6261	38.9339	17.4557	47.415	40.4849	42.6504	34.1945	64.3256	24.1357	60.7901	0.588079	1	1.05349	1.88117	2.51868	2.23044
ENSGALG00000028095	ENSGALG00000028095		HOXA1	2	32634687	32636037	0.701912	17.6689	5.9443	203.59	14.2706	13.8627	3.61903	70.8509	7.09956	112.794	44.6152	0.0397258	3.94321	0.261062	0.100204	0.395546	0.0291974
ENSGALG00000013454	ENSGALG00000013454		HOXB1	27	3648587	4003342	0.228274	2.29622	1.19356	1.1446	0.700184	0.0772429	1.29741	0.354861	5.05522	0.757122	23.3813	0.0994129	1	16.7965	14.2456	30.8818	1.04277
ENSGALG00000035016	ENSGALG00000035016		ID2	3	96269601	96271725	62.9122	201.764	228.44	406.948	164.288	230.033	51.6189	247.989	90.7258	200.559	138.672	0.311811	3.18271	0.224398	0.365846	0.691427	0.561349
ENSGALG00000035317	ENSGALG00000035317		ID3	23	2211791	2213069	208.685	111.088	77.4601	644.908	139.029	212.972	58.7662	307.771	167.839	314.408	145.862	1.87856	2.3658	0.275934	0.545337	0.463926	0.12011
ENSGALG00000006317	ENSGALG00000006317		ING5	9	4759612	4816518	51.9155	22.4061	18.6428	15.6245	28.4019	21.0882	70.4129	14.3982	47.2077	15.63	26.2213	2.31703	1	3.33897	3.27872	1.67763	1.19318
ENSGALG00000014297	ENSGALG00000014297		IRF7	5	15845876	15849344	7.75738	8.64611	2.12619	2.2129	3.55325	6.41784	8.91007	71.8024	10.3351	59.1791	5.08498	0.89721	1	1.38833	0.143938	0.0859253	0.960816
ENSGALG00000005757	ENSGALG00000005757		IRF8	11	17821800	17827332	6.84672	6.79548	13.2926	3.11814	5.8777	5.52006	11.616	6.33508	11.8905	7.28987	16.1887	1.00754	1	2.10432	1.87693	2.22071	4.26299
ENSGALG00000030991	ENSGALG00000030991		IRX1	2	87405529	87410670	0.615797	0.627249	5.92881	10.1087	1.06592	1.56065	3.95211	0.998587	7.50487	0.718434	8.76148	0.981742	1	2.53235	7.51549	12.1952	0.586506
ENSGALG00000013193	ENSGALG00000013193		IRX2	2	86903335	86907419	0.293296	0.163225	20.308	2.37863	0.054743	0	1.71569	0.191477	7.5517	0.193654	8.02136	1.79688	1	1.71569	39.4392	41.4211	8.53769
ENSGALG00000006424	ENSGALG00000006424	PHF15	JADE2	13	15859408	15899407	33.7641	15.2538	6.87819	5.80141	6.86363	7.6055	20.8073	14.5381	16.9818	11.833	8.9558	2.21349	1	2.73582	1.16809	0.756849	1.18561
ENSGALG00000011278	ENSGALG00000011278		KAT2B	2	35988107	36027652	1.59641	1.04538	1.08638	2.40222	0.564459	0.812731	4.72843	3.0289	3.93758	3.69836	2.42028	1.52711	1	5.81795	1.3	0.65442	0.45224
ENSGALG00000016927	ENSGALG00000016927		KLF5	1	156077320	156094516	34.8039	82.5917	12.2378	50.1342	116.897	150.131	67.0532	165.256	54.1097	118.949	34.5683	0.421397	1.74335	0.446631	0.32743	0.290614	0.244101
ENSGALG00000033178	ENSGALG00000033178		KLF6	2	11799037	11808009	0.594872	0.883677	5.34323	6.71477	1.689	11.6307	7.12007	68.0496	20.2698	41.4008	6.62388	0.673178	1	0.612179	0.297868	0.159994	0.795743
ENSGALG00000014485	ENSGALG00000014485		LDB2	4	76744860	76951561	11.5638	12.0352	6.69224	2.77939	15.2416	7.59401	8.79599	6.2733	9.15299	3.83888	7.23262	0.960832	1	1.15828	1.45904	1.88404	2.40781
ENSGALG00000008303	ENSGALG00000008303		LHX5	15	12639427	12644631	10.2301	0.82208	145.66	9.24127	0.466459	0.51234	15.1162	0.291136	73.238	1.36601	92.4406	12.4442	1	29.5042	251.559	67.672	15.7619
ENSGALG00000036022	ENSGALG00000036022		LIN28A	23	175669	186981	88.0973	82.9831	269.37	215.936	147.891	164.24	199.176	142.764	273.939	134.067	326.076	1.06163	1	1.21271	1.91882	2.43219	1.24745
ENSGALG00000026761	ENSGALG00000026761		LIN28B	3	69096719	69176650	46.066	33.5803	56.4206	7.5452	39.5662	19.9496	101.438	17.5185	68.2704	15.3052	64.1048	1.37182	1	5.08471	3.89705	4.18843	7.47768
ENSGALG00000035679	ENSGALG00000035679		LMO1	5	10128269	10140533	4.0287	1.06608	252.616	2.82372	0.695537	5.29671	1.05067	2.60792	20.3823	3.72407	77.1505	3.77898	1	0.198363	7.81554	20.7167	89.4621
ENSGALG00000016920	ENSGALG00000016920		LMO7	1	154868241	154908783	0.358991	1.88791	0.736141	2.82946	7.26555	22.5541	2.15252	46.7281	2.90794	34.6018	2.98146	0.190153	1	0.0954381	0.0622311	0.0861649	0.26017
ENSGALG00000040582	ENSGALG00000040582		LMX1B	17	10543137	10636808	2.81424	4.30566	40.752	4.63433	2.95691	0.78899	1.06857	2.86787	13.3404	3.2714	24.7394	0.653614	1	1.35435	4.65168	7.56233	8.7935
ENSGALG00000026264	ENSGALG00000026264		MAFA	2	148778574	148780708	75.4227	19.3363	13.3459	12.933	14.959	6.93478	46.7438	6.77935	15.6284	5.56137	8.39234	3.90058	1	6.74049	2.30529	1.50904	1.03193
ENSGALG00000017199	ENSGALG00000017199		MAML2	1	184996597	185204663	1.99221	5.90467	13.7016	1.14865	9.29255	4.2123	4.52694	1.97814	8.08347	2.10169	10.7484	0.337396	1	1.0747	4.0864	5.11417	11.9284
ENSGALG00000001101	ENSGALG00000001101		MBD3	28	2453801	2470213	317.305	180.55	341.817	112.763	160.674	140.162	196.933	108.207	207.928	91.8279	213.765	1.75744	1	1.40504	1.92158	2.32789	3.03129
ENSGALG00000016890	ENSGALG00000016890		MBNL2	1	145335207	145407071	1.42511	5.20471	1.19785	11.3152	7.82778	14.7381	2.05589	13.3272	2.92439	11.6724	1.32931	0.273812	1	0.139495	0.21943	0.113885	0.105862
ENSGALG00000030377	ENSGALG00000030377		MDFI	26	4904775	4905638	27.4402	22.5762	24.0245	13.819	12.995	10.6177	8.02361	6.93874	21.0423	14.5361	22.9812	1.21545	1.6196	0.755682	3.03258	1.58097	1.73851
ENSGALG00000037787	ENSGALG00000037787		MEF2D	25	1557866	1620174	3.86878	4.81843	3.81941	6.82255	10.5289	17.1305	5.16962	18.4237	7.92364	16.1134	5.81684	0.802913	2.03669	0.301779	0.430079	0.360994	0.559821
ENSGALG00000041626	ENSGALG00000041626		MEIS1	3	10483926	10577709	2.63476	0.983613	7.28981	17.9325	0.849064	0.730397	4.93904	1.88346	9.60804	3.78613	17.0397	2.67866	1	6.76213	5.10127	4.50056	0.406514
ENSGALG00000039118	ENSGALG00000039118		MEIS2	5	31240856	31409344	5.19535	2.08531	24.9753	7.44186	0.248923	0.180737	14.02	1.59114	36.892	2.09905	39.0388	2.4914	1	77.5713	23.1859	18.5983	3.35606
ENSGALG00000038504	ENSGALG00000038504		MID1	1	124632217	124725073	2.85574	3.26994	20.2873	8.05624	7.88539	9.02306	12.8937	6.13756	15.4339	5.74923	16.7621	0.873331	1	1.42897	2.51466	2.91554	2.51821
ENSGALG00000015078	ENSGALG00000015078		MLLT3	Z	34030582	34141800	2.30828	1.81739	4.76044	1.7267	1.97918	2.5362	4.08129	1.94642	4.02133	2.38673	6.16043	1.27011	1	1.60921	2.06601	2.58112	2.75696
ENSGALG00000004397	ENSGALG00000004397		MLXIP	15	5796665	5813999	6.77935	4.99504	13.1304	2.93079	7.83773	3.79897	8.93216	4.3897	9.7464	2.8638	8.60121	1.35722	1	2.35121	2.22029	3.00343	4.48016
ENSGALG00000012024	ENSGALG00000012024	MKL1	MRTFA	1	50007128	50093845	8.63229	7.56195	12.2005	17.3015	12.4401	19.0885	12.415	29.1849	10.9601	28.1619	10.508	1.14154	1.00202	0.650392	0.37554	0.373128	0.70517
ENSGALG00000015013	ENSGALG00000015013		MSX1	4	79398825	79401315	8.93648	160.579	43.7057	336.847	125.036	298.253	25.147	332.286	13.4061	309.807	33.9691	0.0556516	4.9722	0.0843143	0.0403451	0.109646	0.129749
ENSGALG00000002803	ENSGALG00000002803		MTA1	8	4026900	4093219	143.197	69.0561	75.0444	35.7809	35.1976	31.1865	144.705	42.1402	108.711	41.6828	64.6546	2.07363	1	4.63999	2.57975	1.55111	2.09733
ENSGALG00000013956	ENSGALG00000013956		MYB	3	55871890	55897055	1.70021	1.42773	3.17478	2.27064	1.57964	2.34356	3.27838	1.92919	2.8122	1.37086	2.67168	1.19085	1	1.39889	1.45771	1.94891	1.39819
ENSGALG00000033631	ENSGALG00000033631		MYC	2	139845724	139849615	9.10536	103.814	9.90927	18.9738	46.9056	79.2041	23.8804	105.639	33.6078	68.006	21.3281	0.0877084	1.96419	0.301505	0.318138	0.313621	0.522261
ENSGALG00000024047	ENSGALG00000024047		MYCL	23	5548133	5550962	43.1012	25.8282	54.8507	35.1178	16.7253	17.3443	34.7213	12.8729	30.7018	18.1931	46.4404	1.66877	1	2.00189	2.38499	2.55264	1.56191
ENSGALG00000016462	ENSGALG00000016462		MYCN	3	99664877	99667310	119.433	72.6426	119.574	5.30603	36.7019	22.5124	113.737	25.384	85.8359	15.8789	77.2078	1.64412	1	5.05219	3.3815	4.86229	22.5355
ENSGALG00000010869	ENSGALG00000010869		MYSM1	8	26417386	26429418	5.70267	7.37618	6.56	4.78229	6.43913	5.53499	5.74862	3.63827	6.41121	3.63878	4.72217	0.77312	1	1.0386	1.76216	1.29773	1.37173
ENSGALG00000037778	ENSGALG00000037778		NAB1	7	59839	77654	4.15118	5.60066	5.8931	8.02387	7.24009	10.4653	17.5191	19.6063	11.8031	19.1637	9.45687	0.741195	1	1.67402	0.602005	0.493478	0.734446
ENSGALG00000027772	ENSGALG00000027772		NANOG	1	75915830	75918614	362.954	429.551	14.9101	40.6363	350.157	454.891	192.021	565.249	87.4531	253.949	41.8546	0.844961	1.82353	0.422125	0.154716	0.164815	0.366916
ENSGALG00000005653	ENSGALG00000005653		NFKB2	6	16936050	16944525	8.6475	8.19591	6.91019	10.3441	8.56087	9.20309	14.0039	19.8808	11.0365	15.5945	8.68041	1.0551	1	1.52165	0.555134	0.556633	0.668032
ENSGALG00000010500	ENSGALG00000010500		NKX6-2	6	35311071	35313308	0.597974	0.222493	19.2794	0.289365	0.116118	0	0.0887416	0.203034	1.50476	0.1232	13.6633	2.68761	1	0.0887416	7.41137	110.903	66.6266
ENSGALG00000008519	ENSGALG00000008519		NR2C2	12	19784605	19809996	4.78907	5.20301	5.34249	4.52789	5.86839	5.96195	4.84537	5.0697	6.26887	4.68608	4.53747	0.920442	1	0.812716	1.23654	0.968287	1.17991
ENSGALG00000015681	ENSGALG00000015681		NRIP1	1	98322193	98325661	6.64628	5.55192	4.26973	2.78017	10.3473	6.78898	35.066	13.0864	11.4853	9.65692	7.8559	1.19711	1	5.16514	0.877652	0.8135	1.53578
ENSGALG00000002971	ENSGALG00000002971		NSD1	13	10206725	10259504	110.322	76.3826	40.4754	12.3339	53.3803	19.9451	98.3453	17.7933	73.1222	14.2115	33.0796	1.44433	1	4.9308	4.10954	2.32766	3.28164
ENSGALG00000015705	ENSGALG00000015705	WHSC1	NSD2	4	83802146	83861078	16.3129	13.0199	33.7724	11.1366	18.7363	16.6533	25.4252	11.8719	27.3259	10.5737	24.3481	1.25292	1	1.52674	2.30173	2.3027	3.03256
ENSGALG00000034889	ENSGALG00000034889		OTX2	5	55922635	55929314	84.6628	14.6109	186.899	9.13277	6.21046	3.18811	106.865	8.02153	118.502	5.03106	106.287	5.7945	1	33.5199	14.773	21.1262	20.4647
ENSGALG00000012123	ENSGALG00000012123		PAX6	5	5201970	5218801	0.313519	0.406927	2.57147	2.47899	0.733068	0.402682	0.512336	1.73814	1.23806	1.41922	3.88484	0.770455	1	1.27231	0.71229	2.73731	1.03731
ENSGALG00000034076	ENSGALG00000034076		PBX4	AADN04000744.1	40160	49650	20.2344	14.7485	20.7594	17.2737	13.935	8.66009	13.867	8.00289	13.6159	7.6323	13.1004	1.37196	1	1.60125	1.70137	1.71644	1.20179
ENSGALG00000008700	ENSGALG00000008700		PDCD4	6	26158227	26173945	81.3756	42.4413	225.163	106.995	61.1969	79.6208	64.4846	47.2894	88.7044	50.8006	147.333	1.91737	0.949016	0.809896	1.87578	2.90022	2.10443
ENSGALG00000005422	ENSGALG00000005422		PDLIM1	6	16449297	16486297	43.0696	57.2902	24.5503	92.7998	37.2089	52.1012	28.648	103.6	27.9117	106.006	25.8686	0.75178	1.29883	0.549853	0.269418	0.24403	0.264551
ENSGALG00000039872	ENSGALG00000039872		PDLIM4	13	16875246	16905638	20.0549	10.4031	20.5217	7.12766	3.12397	2.91115	17.4105	2.8377	22.5617	2.72894	21.2991	1.92778	1	5.98063	7.9507	7.8049	2.87916
ENSGALG00000012211	ENSGALG00000012211		PDLIM5	4	58569545	58695921	8.78622	14.3484	3.79288	19.5509	25.1979	41.2884	14.3529	26.2511	9.46968	23.7949	7.06917	0.612348	1.7556	0.347625	0.360735	0.297088	0.194
ENSGALG00000001845	ENSGALG00000001845		PHTF1	26	3719994	3729665	20.2313	16.0766	26.8463	7.49298	13.897	10.6569	20.7204	8.11218	21.7491	6.21369	17.0748	1.25843	1	1.94432	2.68104	2.74793	3.58286
ENSGALG00000042492	ENSGALG00000042492		PITX2	4	58157161	58171834	26.3848	44.4584	1.35124	7.1944	28.232	17.6829	2.15649	17.6044	1.40205	29.218	2.06853	0.593472	13.0916	0.121953	0.079642	0.0707964	0.187818
ENSGALG00000042851	ENSGALG00000042851		PPARGC1A	4	74475026	74593998	0.651726	2.90596	0.397979	5.98652	8.67136	18.0042	2.82239	8.60734	1.22776	7.89825	0.894186	0.224272	1	0.156763	0.142641	0.113213	0.0664792
ENSGALG00000033439	ENSGALG00000033439		PRDM14	2	116911618	116916354	116.818	45.8027	23.2739	2.58277	32.7546	16.2222	96.4366	7.95633	66.4946	1.58933	25.7911	2.55046	1	5.94473	8.35745	16.2277	9.01122
ENSGALG00000001506	ENSGALG00000001506	PTTG1	PTTG2	13	7818157	7832434	181.056	151.934	156.62	118.962	103.256	94.7934	118.834	73.6816	109.258	74.9533	151.341	1.19168	1	1.25361	1.48284	2.01914	1.31655
ENSGALG00000044251	ENSGALG00000044251		RASSF7	5	15892435	15899025	4.48968	11.9154	20.4757	44.9991	22.9921	39.9785	8.03444	37.7688	12.4172	36.1746	13.1309	0.376796	2.86169	0.200969	0.328769	0.362987	0.455025
ENSGALG00000001773	ENSGALG00000001773		RFX2	28	1576434	1603526	1.80197	2.0645	13.8195	4.00045	2.70898	4.17569	2.10031	3.33312	6.98376	2.66258	5.44176	0.872836	1	0.502985	2.09526	2.04379	3.45449
ENSGALG00000010179	ENSGALG00000010179		RFX3	Z	26672762	26773738	2.72375	2.14881	5.19936	1.01983	2.53015	2.50752	6.60084	1.80365	6.60218	1.73092	5.2727	1.26756	1	2.63242	3.66046	3.04618	5.09826
ENSGALG00000043085	ENSGALG00000043085		RNF14	13	17254743	17261627	17.4943	17.0757	18.7746	19.3002	18.8866	19.7037	29.0541	22.0384	20.029	23.3327	16.5904	1.02451	1	1.47455	0.908823	0.711036	0.972767
ENSGALG00000012799	ENSGALG00000012799		RREB1	2	64856785	64985116	0.653055	6.30976	0.241805	8.17872	9.18947	11.8755	1.34223	12.9924	1.83765	12.3148	1.56619	0.103499	1	0.113025	0.14144	0.127179	0.0295651
ENSGALG00000033091	ENSGALG00000033091		RUNX1T1	2	125596520	125702636	12.2092	3.9405	1.42418	0.29544	1.82382	0.521881	23.0772	0.455854	7.37694	0.968825	3.01089	3.09839	1	44.2193	16.1827	3.10777	4.82054
ENSGALG00000039238	ENSGALG00000039238		SALL1	11	6043785	6062292	16.3854	29.7313	67.4581	29.6654	31.4974	47.7623	64.1774	25.7654	69.9305	17.7007	66.5998	0.551116	1	1.34368	2.71412	3.76255	2.27397
ENSGALG00000041404	ENSGALG00000041404		SALL3	2	57106918	57126307	0.411017	0.539095	4.85354	2.44037	1.12702	2.02816	1.74189	1.52337	3.58046	1.65321	5.72592	0.76242	1	0.858852	2.35035	3.46352	1.98885
ENSGALG00000041790	ENSGALG00000041790		SAMD4A	5	56498665	56564359	15.4887	13.0826	10.3392	4.93507	8.85254	7.6894	17.2632	31.0121	16.9926	24.891	10.1474	1.18392	1	2.24506	0.547935	0.407673	2.09505
ENSGALG00000016537	ENSGALG00000016537		SCML2	1	120694800	120730607	2.5492	3.72042	6.28568	11.3008	9.1394	11.1389	5.10868	23.593	5.95498	28.7861	7.58248	0.685191	1	0.458634	0.252405	0.263408	0.556215
ENSGALG00000004324	ENSGALG00000004324		SETD1B	15	5682195	5723072	3.73209	3.49887	5.69007	3.02715	4.32832	4.25474	4.30175	3.05203	5.75097	2.67399	3.84678	1.06666	1	1.01105	1.88431	1.43859	1.87968
ENSGALG00000042051	ENSGALG00000042051		SETD2	2	3915870	3953545	95.7411	48.857	171.407	34.1557	44.3312	38.029	106.954	36.0698	137.59	32.3225	106.287	1.95962	1	2.81243	3.81455	3.28833	5.0184
ENSGALG00000001644	ENSGALG00000001644		SIN3A	10	2590069	2610361	54.2205	41.7122	60.7369	23.4023	30.632	24.6483	39.7553	18.9989	42.323	18.3485	31.6184	1.29987	1	1.6129	2.22766	1.72321	2.59534
ENSGALG00000029401	ENSGALG00000029401		SIX1	5	54487606	54490069	1.14794	1.04338	4.29682	15.0935	1.75602	6.63945	1.83792	4.251	4.43389	3.57323	10.4455	1.10021	1	0.276818	1.04302	2.92327	0.28468
ENSGALG00000032259	ENSGALG00000032259		SIX3	3	25897936	25901177	0.851687	0.103561	40.7557	0.735919	0.0608225	0	1.16185	0	38.2769	1.0323	65.9191	8.22401	1	1.16185	38.2769	63.8565	55.3807
ENSGALG00000036001	ENSGALG00000036001	SMAD2	SMAD2Z	Z	1515764	1555787	16.1185	9.23512	19.9597	10.4506	15.3211	17.6873	20.8961	13.3329	16.1039	11.2527	17.9362	1.74535	1	1.18142	1.20783	1.59395	1.90991
ENSGALG00000010164	ENSGALG00000010164		SMARCA2	Z	26328237	26435687	0.370375	1.87402	2.33017	5.39256	6.30891	9.54538	1.94277	11.0497	1.13092	12.1224	1.84452	0.197637	1	0.20353	0.102348	0.152158	0.432108
ENSGALG00000029247	ENSGALG00000029247		SMARCD1	33	296753	327900	66.7066	49.4753	62.1674	34.7525	29.9219	26.5442	40.9502	26.483	53.6843	24.3923	50.6639	1.34828	1	1.54272	2.02712	2.07704	1.78886
ENSGALG00000008018	ENSGALG00000008018		SNAI1	20	14008761	14012151	6.12187	8.36226	5.56073	4.33202	3.75262	5.98079	33.8683	37.457	56.8601	24.3817	16.0978	0.732083	1	5.66285	1.51801	0.660241	1.28363
ENSGALG00000030353	ENSGALG00000030353		SOX1	1	139815683	139817990	0.574627	0.207155	5.99017	0.103985	0.25875	0.13558	0.420954	0.0849648	1.22947	0.0687649	4.40002	2.7739	1	3.10484	14.4703	63.9864	57.6061
ENSGALG00000016397	ENSGALG00000016397		SOX11	3	94937211	94939190	17.5322	5.20249	30.6033	1.66432	3.32507	2.37662	43.8726	3.54616	34.1107	2.49078	39.8641	3.36996	1	18.4601	9.61905	16.0047	18.3879
ENSGALG00000000583	ENSGALG00000000583		SOX13	26	1683808	1703852	59.6072	28.7985	59.8613	30.1721	21.0604	15.1568	48.4695	22.5608	66.2164	17.0291	55.3895	2.0698	1	3.19787	2.93502	3.25264	1.984
ENSGALG00000043460	ENSGALG00000043460		SOX2	9	16918110	16919468	1.53595	0.198435	78.1694	0.248858	0.233021	0.0407133	8.85949	0.254647	44.7016	0.412049	56.8839	7.74032	1	217.607	175.543	138.051	314.112
ENSGALG00000040383	ENSGALG00000040383		SOX3	4	10557675	10558846	213.843	106.851	111.627	52.2043	70.9739	51.9302	160.168	51.7329	105.641	46.1023	70.7277	2.00132	1	3.08429	2.04205	1.53415	2.13827
ENSGALG00000036497	ENSGALG00000036497		SOX4	2	59096906	59098672	6.24042	6.48637	29.4973	4.51315	4.11643	4.99572	16.3091	4.96709	18.5072	4.57175	27.9894	0.962082	1	3.26461	3.72596	6.12225	6.53586
ENSGALG00000004386	ENSGALG00000004386		SOX9	18	8866455	8869366	0.524042	0.82243	8.55791	6.32439	1.12929	2.53175	1.36752	4.15765	8.84769	6.69525	9.30423	0.637187	1	0.540148	2.12805	1.38968	1.35316
ENSGALG00000039454	ENSGALG00000039454		SP4	2	30491274	30515206	8.17367	6.77451	17.0003	5.65636	8.66091	9.55324	12.9908	6.0775	14.6165	6.10007	16.4665	1.20653	1	1.35983	2.40502	2.6994	3.00552
ENSGALG00000010646	ENSGALG00000010646		STOX2	4	39895977	39956315	0.33825	0.000567355	0.000878918	0.642545	1.08217	0.00464561	2.14295	0.0027215	0.000571868	0.00220764	0.0018775	596.188	1	461.285	0.21013	0.850456	0.00136787
ENSGALG00000011489	ENSGALG00000011489		T	3	43074401	43082303	11.9476	7.35214	3.29513	0.150462	1.56593	0.241374	8.91645	0.212037	4.53141	0.248625	25.4869	1.62505	1	36.9404	21.3708	102.511	21.9001
ENSGALG00000006688	ENSGALG00000006688		TADA3	12	11503035	11506041	24.3903	29.3833	20.388	36.2365	18.4877	31.4468	23.2506	45.484	19.0899	38.8298	20.1848	0.830074	0.795149	0.739363	0.419706	0.519828	0.562637
ENSGALG00000039182	ENSGALG00000039182		TBL1XR1	9	17991353	18078753	17.1459	8.97426	20.7462	2.243	7.88512	3.90004	13.2274	4.63564	19.3474	4.75266	17.7888	1.91056	1	3.39161	4.17362	3.74291	9.24931
ENSGALG00000036043	ENSGALG00000036043		TBX3	15	12277733	12287707	0.651	4.59684	0.0703204	121.27	19.4732	38.9863	0.334466	72.6934	0.687962	80.9178	1.1458	0.141619	58.2218	0.00857906	0.00946389	0.01416	0.000579866
ENSGALG00000004304	ENSGALG00000004304	TCF12	TCF12	10	7045145	7516317	100.254	81.4923	149.372	68.5103	79.9568	83.1578	189.007	80.4356	182.487	73.9113	167.503	1.23023	1	2.27287	2.26873	2.26627	2.18029
ENSGALG00000001093	ENSGALG00000001093	TCF7L1	TCF3	28	2386329	2441061	88.0958	58.8568	116.168	53.5031	69.1475	69.7005	117.57	78.9099	143.06	70.6313	118.729	1.49678	1	1.68679	1.81295	1.68097	2.17124
ENSGALG00000006480	ENSGALG00000006480		TCF7	13	16006865	16064664	2.04118	1.9909	10.2824	1.98692	0.768634	0.586107	6.13619	1.09881	8.53133	1.03701	9.57015	1.02525	1	10.4694	7.76415	9.2286	5.17504
ENSGALG00000008883	ENSGALG00000008883		TCF7L2	6	27067492	27239223	7.42207	6.93209	14.3889	4.70993	5.49244	4.07945	8.81686	4.40321	16.3021	3.75898	12.2264	1.07068	1	2.16129	3.70232	3.25258	3.05501
ENSGALG00000012775	ENSGALG00000012775		TFAP2A	2	63495554	63509044	2.35991	65.0911	23.7198	130.484	90.2798	119.561	26.4694	107.835	42.5371	82.4811	41.7985	0.0362555	3.41072	0.221388	0.394465	0.506765	0.181783
ENSGALG00000007690	ENSGALG00000007690		TFAP2C	20	12148971	12156390	122.761	80.8645	5.32121	102.667	65.1518	40.0678	86.2315	78.9581	53.6095	76.5245	24.5776	1.51811	1	2.15214	0.678961	0.321173	0.0518298
ENSGALG00000011635	ENSGALG00000011635		TFCP2L1	7	26189843	26218128	2.01586	1.83964	2.21361	12.3805	6.81455	19.6666	1.67041	17.1062	1.68592	23.0071	1.67071	1.09579	1	0.0849364	0.0985561	0.0726171	0.178798
ENSGALG00000014795	ENSGALG00000014795		TGIF1	2	101084413	101092939	123.896	65.6309	55.4685	37.2563	55.5344	28.22	100.848	36.2836	90.8023	33.8467	56.684	1.88777	1	3.57364	2.50257	1.67473	1.48884
ENSGALG00000034649	ENSGALG00000034649		TOX3	11	5324988	5446431	0.81044	0.407392	3.80261	0.306846	0.209593	0.106475	0.671663	0.100186	1.26875	0.067581	1.97087	1.98934	1	6.30818	12.6639	29.1631	12.3926
ENSGALG00000012823	ENSGALG00000012823		TRIM24	1	56435002	56493091	162.677	92.6902	40.3062	20.121	43.2953	27.505	111.768	31.8779	73.6602	23.3957	45.461	1.75506	1	4.06355	2.3107	1.94313	2.00319
ENSGALG00000034004	ENSGALG00000034004		TRIM3	1	194432358	194438661	19.8448	18.9344	37.452	89.8327	29.5665	45.4587	26.3806	72.2335	28.6221	86.4194	29.8182	1.04808	1.12077	0.58032	0.396244	0.345041	0.416908
ENSGALG00000012367	ENSGALG00000012367		TRIM9	5	58110006	58139997	5.0077	2.12661	12.2728	1.74121	2.07968	0.533782	3.94066	0.443167	5.71748	0.536799	6.127	2.35478	1	7.38253	12.9014	11.414	7.04843
ENSGALG00000031560	ENSGALG00000031560	KIAA2018	USF3	1	79232532	79256355	2.95863	1.83528	4.74108	1.56229	2.59561	2.32048	4.21919	1.39286	4.86785	1.78355	3.4828	1.61209	1	1.81824	3.49486	1.95273	3.0347
ENSGALG00000006412	ENSGALG00000006412		VGLL1	4	4375986	4381807	2.87888	46.8724	0	110.954	77.5124	119.485	13.6747	131.066	8.55056	168.184	5.80218	0.0614195	5.66831	0.114447	0.0652386	0.034499	0
ENSGALG00000014917	ENSGALG00000014917		VGLL2	3	63207045	63212424	19.3538	42.2981	0.0872358	10.244	8.71196	7.62795	9.56064	4.7511	7.87772	1.92214	4.8606	0.457557	1	1.25337	1.65808	2.52874	0.00851579
ENSGALG00000029135	ENSGALG00000029135		YEATS4	1	35425913	35432184	107.294	30.2486	119.923	22.355	18.1478	13.0978	50.6227	15.6054	64.3331	17.9945	71.36	3.54707	1	3.86498	4.12249	3.96566	5.36448
ENSGALG00000011718	ENSGALG00000011718		ZBTB1	5	52971777	52983605	21.8543	15.7246	19.5522	7.22114	11.0812	9.51085	26.2065	12.1505	24.1821	10.6913	20.7492	1.38982	1	2.75543	1.99021	1.94076	2.70763
ENSGALG00000006062	ENSGALG00000006062		ZBTB46	20	9775105	9805872	9.12457	7.77772	9.63716	14.9943	10.883	19.9279	12.3266	30.6277	14.2171	35.7312	12.6671	1.17317	0.882887	0.61856	0.464191	0.354511	0.642722
ENSGALG00000040465	ENSGALG00000040465		ZEB2	7	33480905	33588820	0.684525	0.111382	27.0339	0.0683598	0.121534	0.0848913	0.4655	0.31956	8.97911	0.320274	13.587	6.14574	1	5.48348	28.0984	42.4231	395.465
ENSGALG00000000713	ENSGALG00000000713		ZFHX3	11	19692862	19834198	2.03141	2.51112	2.48603	8.07517	5.01405	6.45097	2.44081	8.8357	2.91027	11.5249	2.73716	0.808966	1	0.378363	0.329376	0.2375	0.307861
ENSGALG00000043827	ENSGALG00000043827		ZHX2	2	137987771	137990264	9.31993	4.8666	19.3552	2.62587	5.17653	2.68113	8.10985	4.84618	13.5176	6.09435	15.2934	1.91508	1	3.02479	2.78933	2.50944	7.37097
ENSGALG00000040532	ENSGALG00000040532		ZIC1	9	11935071	11938586	0.213852	0	11.1983	0.0264108	0	0	0	0	2.63993	0.0262053	6.42427	0.213852	1	0	2.63993	245.152	424.005
ENSGALG00000041083	ENSGALG00000041083		ZIC2	1	144281220	144285013	4.7942	0.0232628	185.63	0.447374	0	0	12.6076	0.0955119	48.5907	1.04326	80.2426	206.089	1	12.6076	508.74	76.9152	414.932
ENSGALG00000031144	ENSGALG00000031144		ZIC3	4	4574009	4576392	21.6708	1.29912	121.43	0.42241	0.225963	0.236875	45.6811	0.296353	55.1188	0.95909	58.394	16.6811	1	192.849	185.99	60.8848	287.47
ENSGALG00000005533	ENSGALG00000005533		ZMYM3	4	2297763	2327175	5.57238	5.16275	8.95404	4.61546	5.19545	3.84485	5.19068	2.48042	7.06341	2.20758	5.04239	1.07934	1	1.35003	2.84767	2.28413	1.94001
ENSGALG00000006599	ENSGALG00000006599		ZMYND11	2	9883489	9946309	0.276189	1.7518	1.38635	5.20403	3.77386	6.89859	1.72265	7.42212	2.64596	8.67966	2.98966	0.15766	1	0.24971	0.356497	0.344444	0.266399
ENSGALG00000009454	ENSGALG00000009454		ZNF277	1	26968440	27022185	14.304	17.3585	11.3685	8.9652	11.4095	11.0678	21.8276	8.7938	18.4766	9.51162	18.7193	0.824034	1	1.97217	2.10109	1.96805	1.26807
ENSGALG00000012629	ENSGALG00000012629		ZNF367	Z	42166306	42170592	5.58149	5.25116	7.86289	2.95394	5.44958	4.60238	6.21964	2.85022	7.26902	3.05653	4.57343	1.06291	1	1.3514	2.55034	1.49628	2.66183
ENSGALG00000003403	ENSGALG00000003403		ZNF385C	27	5186132	5220676	1.49363	0.356231	4.74242	4.28922	1.13168	0.635227	3.78226	0.312405	6.27807	0.456642	7.44684	4.19287	1	5.95419	20.0959	16.3078	1.10566
ENSGALG00000024378	ENSGALG00000024378		ZNF414	28	1734532	1739063	6.499	4.40965	10.2038	7.56814	2.94924	3.99874	5.10819	3.78747	5.90743	4.38643	6.13514	1.47381	1	1.27745	1.55973	1.39866	1.34826
ENSGALG00000003891	ENSGALG00000003891		ZNF423	11	6819993	7018204	63.9327	29.9173	175.279	38.648	28.3381	24.7216	40.8151	20.0705	63.3482	18.4973	84.9879	2.13698	1	1.65099	3.15628	4.59461	4.53527
ENSGALG00000015451	ENSGALG00000015451		ZNF462	Z	55489589	55547342	29.1032	13.6706	19.8547	7.57846	13.0253	4.74311	78.8233	5.48381	49.7197	4.68773	33.8656	2.12889	1	16.6185	9.06663	7.22431	2.61989
ENSGALG00000013660	ENSGALG00000013660		ZNF516	2	91127585	91184075	7.46533	7.16786	10.9924	4.94039	5.7347	6.43446	11.4524	5.0429	14.2759	6.0097	11.9087	1.0415	1	1.77985	2.83089	1.98158	2.22501
ENSGALG00000015112	ENSGALG00000015112		ZNF521	2	103906762	104138860	10.5139	3.26241	24.881	11.6426	7.35113	7.26479	12.5626	6.86109	20.1197	7.83696	20.8734	3.22274	1	1.72924	2.93243	2.66346	2.13707
ENSGALG00000000817	ENSGALG00000000817		ZNF821	11	19972950	19984338	11.978	8.08242	14.8929	9.06926	6.14436	9.35867	12.188	7.72668	15.6059	6.49004	10.5518	1.48198	1	1.30232	2.01974	1.62585	1.64213

## Sheet: GRN NanoString expression
Supplementary Table. NI gene expression from NanoString assay
text colored blue: expression level <100 cell colored green FC >1.2 cell colored blue: FC<0.8 cell colored yellow: p value<0.05
ID	Genes	CNG_1H_FC	CNG_1H_T_test	CNG_1H_Induced_mean	CNG_1H_Uninduced_mean	CNG_3H_FC	CNG_3H_T_test	CNG_3H_Induced_mean	CNG_3H_Uninduced_mean	CNG_5H_FC	CNG_5H_T_test	CNG_5H_Induced_mean	CNG_5H_Uninduced_mean	CNG_7H_FC	CNG_7H_T_test	CNG_7H_Induced_mean	CNG_7H_Uninduced_mean	CNG_9H_FC	CNG_9H_T_test	CNG_9H_Induced_mean	CNG_9H_Uninduced_mean	CNG_12H_FC	CNG_12H_T_test	CNG_12H_Induced_mean	CNG_12H_Uninduced_mean
XM_004941100.1	AFF1	0.827597	0.0624874	390.799	472.209	0.508243	0.00265673	244.401	480.875	0.530203	0.00751941	205.257	387.129	0.717302	0.0325233	285.38	397.852	0.96875	0.890312	290.968	300.354	1.20499	0.253168	315.444	261.782
NM_001031096.1	ASXL2	1.1206	0.371025	225.473	201.208	0.964251	0.581674	229.968	238.494	0.765469	0.0840504	167.469	218.779	0.807619	0.121845	166.862	206.609	0.88491	0.395917	178.454	201.663	0.954455	0.611371	178.211	186.715
XM_419185.4	ASXL3	0.722149	0.487823	29.3517	40.6449	1.44762	0.261892	44.7313	30.8998	3.16044	0.0593026	64.688	20.468	6.71899	4.2564e-05	73.1571	10.8881	9.0674	0.000622677	107.608	11.8676	5.07407	0.00163018	112.97	22.2642
XM_419429.2	ATF3	2.38835	0.00794364	1389.31	581.7	7.29818	0.00390595	3055.64	418.685	5.58023	0.000105604	4154.71	744.54	1.57249	0.19937	1419.25	902.551	0.777357	0.388209	574.536	739.088	0.368593	0.0171526	211.29	573.233
NM_001012813.1	ATF7IP	0.951736	0.662098	1930.25	2028.14	0.858472	0.237962	1201.41	1399.48	1.0602	0.347729	1204.82	1136.41	1.70011	0.00746207	1620.86	953.383	2.25197	0.000619702	1728.48	767.54	2.30434	0.00115412	1721.88	747.235
XM_004938377.1	BACH1	0.944615	0.546802	527.865	558.814	0.470065	3.59184e-05	348.21	740.769	0.349241	9.99729e-05	292.639	837.929	0.340685	0.000769564	276.852	812.634	0.405714	5.615e-06	345.84	852.424	0.344494	0.105246	242.978	705.319
XM_004941760.1	BAZ1A	0.509741	0.416157	9.45331	18.5453	10.8675	0.00104167	149.363	13.744	6.17727	0.00192058	140.621	22.7642	4.24654	0.00938916	63.4678	14.9457	1.52495	0.409922	58.9416	38.6515	1.65645	0.438523	61.8943	37.3656
NM_001031031.1	BCL11A	1.14772	0.496034	118.909	103.605	2.11536	0.068951	176.959	83.6545	2.0728	0.0213688	160.899	77.624	5.79679	0.00182459	164.421	28.3641	4.39386	0.000161285	160.325	36.4884	8.07437	0.00953564	69.2155	8.57225
NM_001277144.1	BHLHE40	1.21967	0.391071	122.967	100.82	0.161913	0.0121263	22.7047	140.228	0.195506	0.025232	34.0821	174.327	0.126901	0.00592702	38.0049	299.486	0.166899	0.000375911	49.6981	297.773	0.2857	0.00369101	36.2096	126.74
ENSGALT00000024824.1	BLIMP1	3.90678	0.00215001	989.528	253.285	18.4738	1.11423e-05	1227.1	66.4235	8.45831	0.000871978	846.86	100.122	4.81041	0.0260129	475.372	98.8215	9.07753	3.26103e-05	412.987	45.4955	14.2953	0.031582	471.626	32.9916
NM_001007988.1	BMI1	0.773785	0.156977	561.294	725.387	1.19443	0.23623	545.674	456.849	1.77675	0.00943485	783.434	440.938	3.37225	0.00146725	1148.99	340.72	4.21783	4.22408e-05	1420.83	336.861	4.47402	6.61713e-05	977.235	218.424
NM_001006148.1	BRD8	0.95149	0.691947	831.831	874.24	1.00712	0.924388	751.479	746.164	1.06188	0.464673	741.303	698.103	1.47874	0.0273633	800.668	541.454	1.76508	0.000222042	899.191	509.434	1.87911	0.0272294	734.992	391.139
XM_004937809.1	BTBD11	0.896025	0.713933	184.436	205.838	1.0596	0.815562	122.331	115.45	3.42659	0.0878696	251.192	73.3067	2.36783	0.208041	230.225	97.2304	2.18475	0.0219709	179.438	82.1322	4.64006	0.000860678	207.116	44.6365
XM_004936422.1	BTBD6	0.807631	0.127315	1946.39	2409.99	0.662947	0.0424479	2206.66	3328.56	0.833709	0.0826965	2532.98	3038.21	1.32114	0.0442712	3449.87	2611.29	1.18517	0.336339	3000.91	2532.05	0.701308	0.0437655	1096.16	1563.02
NM_001011689.1	CBFA2T2	1.05728	0.688994	200.032	189.194	1.58598	0.000538046	201.481	127.039	2.49756	0.00396434	290.919	116.482	4.37368	7.55904e-05	411.596	94.1074	4.30156	0.00619248	420.508	97.757	5.31972	0.0095416	442.229	83.1301
NM_204332.1	CBX1	0.967692	0.564646	2287.08	2363.44	1.2817	0.0157957	2556.28	1994.45	1.39546	0.000900151	2776.12	1989.4	1.78375	0.00817029	3018.47	1692.21	2.203	0.0164808	3516.09	1596.05	3.09757	5.93781e-05	3581.55	1156.24
XM_423911.4	CBX2	0.927169	0.318129	368.559	397.51	2.21383	0.00614992	575.208	259.825	2.42817	0.000712068	591.375	243.548	4.00435	5.8957e-05	696.315	173.889	3.37805	0.0430109	713.035	211.079	6.18439	0.00981088	974.276	157.538
NM_001278149.1	CBY1	0.924175	0.381196	470.461	509.06	0.810867	0.0506083	392.772	484.386	0.932975	0.618481	374.525	401.431	1.19477	0.181802	486.387	407.096	1.70517	0.0195105	581.471	341.005	2.42854	0.000279295	682.435	281.006
NM_205381.1	CCND1	1.8179	0.00854732	3746.26	2060.76	4.62378	3.97835e-05	8882	1920.94	3.38343	3.97341e-06	6854.08	2025.78	3.43567	0.00176835	4815.86	1401.72	4.00112	4.5015e-05	5224.73	1305.82	6.26314	0.00109041	3922.72	626.318
XM_423365.4	CDCA7	0.960059	0.669871	1473.05	1534.33	1.45294	0.00118135	1567.36	1078.75	2.06276	0.000520405	1484.43	719.631	2.58691	0.00451128	1662.33	642.595	2.70906	1.99281e-05	1665.74	614.875	3.06153	2.87765e-05	1575.16	514.503
NM_001030642.1	CDR2	0.947285	0.497515	155.784	164.453	3.22484	0.000144026	463.364	143.686	3.23133	0.00231074	451.068	139.592	3.4157	5.02552e-05	471.65	138.083	3.44972	0.000142646	566.386	164.183	3.47277	0.073004	408.576	117.651
XM_426243.4	CDR2L	0.66151	0.469355	24.3413	36.7965	2.52061	0.0608614	79.5307	31.5522	4.86164	0.00471589	136.098	27.9942	10.5717	0.00451502	201.482	19.0587	10.2284	0.00117023	262.148	25.6295	7.06454	0.000212309	229.047	32.4221
NM_204676.2	CDX1	0.194213	0.154497	1	5.14898	0.677209	0.373901	1	1.47665	1	1	1	1	0.284996	0.373901	1	3.50882	1.84413	0.620626	21.5746	11.6991	18.2451	0.000258738	101.802	5.57971
NM_204311.1	CDX2	0.860118	0.358355	3773.74	4387.47	0.308526	0.00950538	1236.71	4008.44	0.119968	2.01656e-05	533.178	4444.34	0.0824444	0.000258832	432.923	5251.09	0.108092	2.91974e-05	580.993	5374.99	0.192995	0.000358516	1392.92	7217.41
NM_205253.2	CEBPB	3.12457	0.0486922	291.252	93.2132	1.91083	0.34637	161.483	84.5092	3.8699	0.218386	298.892	77.235	0.8294	0.814484	137.496	165.777	0.240876	0.00251701	35.0316	145.434	0.33751	0.0194299	48.2878	143.071
NM_206844.1	CITED2	1.34817	0.078296	956.536	709.508	3.21159	0.000862387	921.159	286.823	3.34372	7.7357e-05	562.26	168.154	3.76335	0.000895123	442.731	117.643	4.7191	0.000736227	452.451	95.8767	7.74801	5.20749e-06	601.61	77.647
NM_204718.2	CITED4	0.92962	0.40212	431.03	463.662	3.53367	0.00142901	1220.81	345.48	4.62087	0.000952379	1221.62	264.37	3.90339	0.00446664	1151.67	295.043	2.81971	0.00886711	974.94	345.759	1.55306	0.0548703	503.006	323.88
NM_001277133.1	CNOT1	0.970529	0.684182	2743.57	2826.89	0.877804	0.135767	2275.9	2592.72	0.854607	0.101053	2062.06	2412.88	1.02776	0.728335	2180.22	2121.34	1.13374	0.145023	2596.16	2289.91	1.33961	0.170981	2134.44	1593.33
XM_422218.4	CRIP2	0.718371	0.2789	78.0679	108.674	4.83356	0.00230103	319.099	66.0175	4.80496	0.000304627	302.67	62.9912	4.55191	0.00127394	316.615	69.5564	4.37586	0.000330465	324.237	74.0968	2.94373	0.0113278	188.318	63.9726
XM_003642883.2	CRTC1	0.98177	0.912544	182.427	185.814	1.01966	0.804293	196.16	192.378	0.986409	0.959609	162.175	164.409	1.82727	0.000115371	199.119	108.971	1.47633	0.143443	207.899	140.822	2.10013	0.0138256	239.724	114.147
XM_418530.4	CSRNP1	1.09991	0.00315302	229.203	208.384	0.430539	0.0110242	138.145	320.865	0.366052	0.00195116	124.466	340.023	0.301903	0.00404237	136.176	451.06	0.40611	0.00366323	189.311	466.156	0.688967	0.00199918	377.932	548.548
NM_205248.1	CSRP1	0.99808	0.979891	526.632	527.646	1.00713	0.936878	454.749	451.531	0.909271	0.495844	373.416	410.676	0.949784	0.577392	327.874	345.209	0.555145	0.0309846	233.005	419.718	0.733036	0.0454481	206.392	281.557
NM_205208.1	CSRP2	0.985365	0.896881	2322.86	2357.36	0.423018	0.00671802	1414.58	3344.02	0.194134	0.00173412	936.937	4826.24	0.118623	0.000457597	638.895	5385.91	0.0907771	4.45991e-05	549.526	6053.57	0.0628675	0.000200202	489.862	7791.98
ENSGALT00000027373.1	DACH1	0.756395	0.506183	93.0602	123.031	0.79112	0.283038	157.655	199.28	0.817226	0.286515	190.113	232.632	2.30359	0.0117813	368.923	160.151	4.09046	0.00444836	513.109	125.44	7.4927	0.000461028	655.868	87.5342
NM_204159.1	DLX5	0.588744	0.139552	421.651	716.187	0.304193	0.0112348	200.577	659.375	0.151327	0.000240114	98.7248	652.394	0.106852	0.00059225	93.2011	872.246	0.159182	0.000780814	117.807	740.075	0.417077	0.0728649	322.928	774.265
ENSGALT00000006362.1	DNMT3A	15.218	0.039136	60.9219	4.00327	97.4608	0.00154896	97.4608	1	74.8499	0.00637845	74.8499	1	35.4369	1.64734e-05	35.4369	1	33.1184	0.00030607	33.1184	1	21.993	0.0277375	21.993	1
NM_001024828.1	DNMT3B	0.901592	0.547685	7117.54	7894.41	1.44078	0.0623952	7534.7	5229.6	1.89796	0.00357406	9351.95	4927.37	2.79517	0.0029223	12000.1	4293.15	3.19905	0.00139883	11174.3	3493	4.5148	0.00196988	10852.5	2403.76
FJ770467.1	E2F2	0.585482	0.03481	81.6567	139.469	1.00973	0.942564	118.611	117.468	2.09505	0.067892	148.05	70.6669	2.57542	0.000399741	187.529	72.8149	3.74089	0.0178238	191.214	51.1145	3.23197	0.00601957	214.512	66.3718
XM_418915.4	E2F3	1.05903	0.433923	629.318	594.242	1.26486	0.0660003	712.799	563.541	1.19249	0.180347	636.255	533.552	1.30271	0.0372118	662.701	508.71	1.63258	0.000218439	771.694	472.685	1.98407	6.74363e-05	661.489	333.401
NM_001012532.1	EHMT1	0.821718	0.378457	277.792	338.062	1.40175	0.0344163	438.168	312.587	1.64676	0.000660471	451.383	274.104	2.81188	0.000502555	585.24	208.131	3.66475	0.000189739	781.693	213.301	4.15354	0.000169296	805.426	193.913
NM_001006269.1	ELF1	0.98553	0.872727	691.189	701.337	0.759758	0.029722	525.527	691.703	0.530301	0.00144702	434.854	820.014	0.397617	6.08e-06	373.589	939.569	0.309436	0.00234321	298.991	966.245	0.309414	0.000493886	255.767	826.617
XM_424790.4	ENC1	4.40379	0.0102697	884.218	200.785	13.9324	0.00265928	1749.29	125.555	6.63425	0.00531454	1386.33	208.966	10.6443	5.4637e-05	1532.77	143.999	18.5753	0.000160143	1927.51	103.767	19.4854	0.00449572	1711.87	87.8541
XM_426003.4	EOMES	1.40501	0.197244	660.268	469.94	6.89541	6.92843e-05	1626.72	235.914	10.3301	0.000791755	2689.8	260.385	7.89791	0.000109	2615.36	331.146	8.31633	0.00047932	1827.06	219.695	85.7874	0.0290608	618.413	7.20867
ENSGALT00000025383.1	ERNI	2.87031	0.0115644	77562.8	27022.4	15.0182	0.000719003	212607	14156.6	10.2121	0.000231348	201790	19759.8	10.5466	6.21415e-05	124606	11814.9	9.00701	0.105638	78714.8	8739.28	3.56733	0.184199	12133.3	3401.23
NM_001007081.1	ESRRG	0.71763	0.00273328	1726.03	2405.19	0.337875	8.85809e-06	923.82	2734.21	0.289381	2.87495e-05	601.594	2078.9	0.362196	7.06716e-05	640.524	1768.44	0.450034	0.000224841	652.635	1450.19	0.636236	0.0663441	650.254	1022.03
NM_205312.1	ETS2	1.10405	0.128925	1431.35	1296.45	0.480123	0.0109529	595.134	1239.54	0.319953	0.000635486	487.03	1522.2	0.19064	0.00101926	308.824	1619.93	0.128747	4.00712e-05	177.272	1376.9	0.149994	0.00664851	131.302	875.38
NM_204917.1	ETV1	1.50783	0.0420607	569.448	377.66	3.096	0.00925493	949.626	306.727	2.26936	0.0056375	795.291	350.447	1.92265	0.00227325	696.152	362.08	1.77351	0.0373831	536.789	302.671	1.20202	0.185352	514.189	427.769
ENSGALT00000031379.1	ETV4	0.475737	0.389178	2.41428	5.07482	295.935	0.000252279	295.935	1	549.794	0.000196281	544.713	0.990758	522.081	0.000144514	522.081	1	451.297	2.13494e-05	451.297	1	180.738	0.0035888	233.269	1.29065
ENSGALT00000009265.1	ETV5	1.21878	0.015203	1149.62	943.253	2.01576	0.00165855	1287.11	638.521	1.91962	8.20603e-05	1162.73	605.706	2.68495	0.0041948	1580.55	588.671	3.51009	0.0352034	1850.16	527.098	6.58658	0.00152429	1938.59	294.325
NM_204915.1	EYA2	1.42222	0.469203	33.2144	23.3539	3.77676	0.236955	32.5708	8.62401	5.13175	0.0299293	68.3621	13.3214	20.3553	0.000238736	39.1343	1.92257	7.90406	0.00826395	66.4762	8.41038	31.929	0.00238622	197.603	6.18882
ENSGALT00000020263.1	EZH2	0.993873	0.919243	2467.56	2482.77	1.72773	0.00173931	2861.87	1656.43	2.13235	0.000255688	2839.3	1331.53	2.76903	0.00177646	3022.13	1091.4	3.78748	6.39809e-07	3428.54	905.23	4.07391	0.0021397	2943.15	722.439
XM_414411.3	FEZF2	2.88545	0.373901	2.88545	1	1	1	1	1	1	1	1	1	1.0886	0.373901	1.0886	1	2.51222	0.192046	2.51222	1	12.329	0.00240542	12.329	1
NM_204770.1	FOXA2	0.775698	0.384818	94.8324	122.254	1.10622	0.293617	112.97	102.122	3.39706	0.0490298	338.7	99.7039	5.68989	0.0284541	693.143	121.82	8.25641	0.0113525	854.75	103.526	9.12214	0.0205793	638.149	69.9561
ENSGALT00000037124.1	FOXI3	0.794718	0.433556	279.201	351.32	1.71732	0.0632991	852.999	496.705	1.71078	0.0418326	638.524	373.236	1.9141	0.0362694	807.832	422.042	2.71826	0.00196136	1203.65	442.801	2.6385	0.0203288	851.852	322.855
NM_001024827.1	FOXP1	0.99672	0.975222	594.711	596.668	1.42371	0.0573188	850.294	597.24	2.06949	0.000396924	990.897	478.812	1.64134	0.0119997	780.002	475.224	1.59539	0.014129	718.408	450.303	1.79221	0.00164928	866.229	483.33
NM_001006535.1	FUBP1	0.956153	0.585145	6438.33	6733.58	0.943047	0.383221	5657.42	5999.09	1.05044	0.344501	5464.29	5201.93	1.54829	0.014575	5890.51	3804.54	2.26546	0.000205106	7386.39	3260.43	2.37947	0.00101959	7636.6	3209.37
NM_001003797.1	GATA2	0.549451	0.000314851	2656.59	4835	0.125491	3.18327e-05	762.544	6076.51	0.107379	4.12964e-06	612.42	5703.33	0.0710835	3.19605e-05	426.375	5998.23	0.0452882	1.71202e-07	267.131	5898.47	0.0465909	0.000746108	253.254	5435.7
NM_001008444.1	GATA3	0.791254	0.746974	31.5946	39.9297	3.41149	0.0553086	83.3033	24.4185	1.21205	0.692754	58.8296	48.5371	0.394794	0.0927087	31.151	78.9044	0.829984	0.488901	74.6129	89.8968	2.53345	0.0483716	195.749	77.2658
XM_423773.4	GATAD2B	0.982067	0.798648	849.174	864.68	1.32412	0.0201276	895.672	676.429	1.41616	0.0101609	942.839	665.771	2.08954	0.00405165	1194.99	571.89	2.45192	0.0150947	1260.77	514.196	2.87385	1.29795e-05	1322.65	460.236
NM_205068.1	GBX2	0.68433	0.261631	33.1006	48.3693	12.1412	0.0267677	140.81	11.5977	44.9883	2.88579e-06	188.761	4.19577	395.471	0.000654196	395.471	1	148.499	0.0122952	875.85	5.898	143.492	0.00206682	1398.02	9.7429
NM_001098851.1	GLI2	0.788231	0.365695	56.672	71.8977	1.60256	0.0537536	214.484	133.838	1.53208	0.0775956	178.68	116.626	2.30657	0.00160731	323.925	140.436	4.14273	0.039101	569.267	137.414	4.97953	0.00806923	1271.09	255.264
NM_001271903.1	GLI3	0.766085	0.211539	136.452	178.116	2.00574	7.52706e-05	543.789	271.116	2.3341	0.0022582	761.604	326.294	2.44948	0.000576415	658.9	268.995	2.94604	0.000423439	832.895	282.717	4.8888	0.000123505	1462.72	299.198
XM_004935752.1	GRHL1	0.885359	0.0762913	687.111	776.082	0.379608	0.000145076	279.273	735.686	0.366317	0.00061688	272.579	744.107	0.379889	0.000186599	295.37	777.518	0.295291	5.4679e-06	214.334	725.843	0.202686	9.78368e-05	154.961	764.539
XM_004939981.1	GRHL2	0.833742	0.212165	2683.24	3218.31	0.413804	8.47758e-05	2011.4	4860.76	0.506087	0.000535308	1966.25	3885.2	0.466325	0.00210193	1622.8	3479.97	0.457675	0.000126734	1564.49	3418.33	0.415319	0.00211094	1159.22	2791.16
XM_004947907.1	GRHL3	0.569816	0.0694746	822.707	1443.81	0.0382474	0.00169988	134.573	3518.5	0.00694724	1.09369e-05	19.0007	2735	0.0100525	0.000354365	26.0863	2595	0.0163314	3.38533e-05	47.1858	2889.26	0.0427108	0.0487649	117.175	2743.45
ENSGALT00000046051.1	HAND1	1.92928	0.215434	76.5514	39.6787	0.447794	0.064608	49.9847	111.624	0.499752	0.0311642	67.1978	134.462	0.0579879	0.00601778	17.8714	308.193	0.0440832	0.000118169	17.3157	392.796	0.0168845	3.51601e-08	13.94	825.607
NM_001031120.3	HDX	0.725127	0.411768	114.836	158.367	0.934834	0.56223	157.836	168.839	0.993202	0.961641	132.954	133.864	1.57526	0.0315846	163.501	103.793	2.04726	0.000518352	214.336	104.694	1.91109	0.00911611	249.799	130.71
NM_001005848.1	HES1	1.06289	0.693827	2056.43	1934.76	1.48267	0.0562647	2253.15	1519.66	0.9917	0.961887	1574.43	1587.6	0.716275	0.0172187	1208.72	1687.51	1.2741	0.0165811	1754.19	1376.81	2.28097	0.000842632	1553.81	681.206
NM_205012.1	HESX1	1.12166	0.785377	53.3359	47.5509	7.50437	0.00799711	189.686	25.2768	23.0574	0.00540445	209.703	9.0948	67.2605	0.00115094	380.344	5.6548	189.605	0.00719577	1469.5	7.7503	112.311	0.0339852	1609.5	14.3307
ENSGALT00000025381.1	HEY1	0.867691	0.393994	99.8522	115.078	2.76782	0.0120439	148.875	53.7876	5.86147	0.000197082	322.25	54.9776	7.98999	0.000739869	288.114	36.0593	8.44398	0.0040589	296.027	35.0578	25.4927	0.000138189	330.897	12.9801
XM_001232784.1	HIC2	0.884976	0.458304	1647.88	1862.06	0.278819	0.000219229	861.634	3090.29	0.206478	7.49172e-05	576.54	2792.27	0.19568	0.000149382	560.926	2866.55	0.299162	0.000378741	783.958	2620.51	0.448785	0.00168534	1062.92	2368.44
NM_204297.1	HIF1A	1.11589	0.213146	3135.54	2809.89	1.38586	0.0222524	2811.99	2029.05	1.70659	0.0216106	2789.15	1634.34	1.76449	0.00833031	3082.92	1747.2	2.05543	7.34512e-05	3748.44	1823.67	3.13899	0.000305538	5093.54	1622.67
NM_204807.1	HIF2A	0.963501	0.654198	6877.47	7138	0.37841	6.24304e-05	2785.72	7361.64	0.152859	1.24938e-05	1112.28	7276.51	0.0845669	5.3657e-07	657.095	7770.13	0.03586	2.13846e-05	303.79	8471.54	0.0134675	0.000557751	155.187	11523
XM_003640420.2	HIPK2	0.956222	0.807015	631.047	659.937	0.845172	0.0868478	602.382	712.733	0.860531	0.114418	642.018	746.072	0.80972	0.000840708	630.902	779.161	0.877769	0.201522	756.805	862.192	0.729586	0.124561	793.697	1087.87
XM_004947685.1	HIVEP3	1.61913	0.522612	14.746	9.10734	17.6421	0.000147528	153.729	8.71376	97.9003	3.57958e-05	428.376	4.37564	14.7879	0.00767178	252.143	17.0506	237.311	0.00132469	122.671	0.516919	15.2246	0.00122051	56.2512	3.69475
NM_204369.1	HMGA1	1.086	0.417318	1432.13	1318.72	2.81389	9.14661e-05	2355.2	836.991	3.63641	2.60897e-05	3818.23	1050	4.63518	0.000592151	4416.42	952.803	4.92812	3.56205e-06	6532.81	1325.62	4.151	5.04852e-05	5576.35	1343.38
NM_205001.1	HMGA2	0.973063	0.329354	1918.09	1971.19	1.08116	0.318707	1917.52	1773.58	1.1509	0.0318893	1941.92	1687.29	1.22764	0.125866	2061.5	1679.24	1.64824	0.00323939	2165.83	1314.03	2.76452	0.000674935	2750.72	995.006
XM_003640697.2	HOXA1	0.962936	0.727741	704.163	731.267	0.674429	0.354193	464.154	688.219	0.233555	0.00285852	207.234	887.302	0.101624	0.00806693	140.997	1387.44	0.165545	0.00470727	474.077	2863.74	0.401664	0.00260976	1892.08	4710.62
NM_001080859.2	HOXB1	0.281602	0.373901	1	3.55111	5.4407	0.440869	18.534	3.40654	3.22502	0.11642	3.22502	1	15.5188	0.0564306	15.5188	1	168.241	0.0971706	168.241	1	412.615	0.000663067	532.54	1.29065
ENSGALT00000036925.1	ID2	0.632237	0.0593448	1545.25	2444.1	0.273813	0.00195871	917.5	3350.82	0.343536	0.000271156	1004.65	2924.43	0.305062	0.00257377	963.251	3157.55	0.556109	0.0044343	1532.2	2755.21	1.18793	0.488503	2609.03	2196.28
NM_204589.1	ID3	0.657249	0.034326	3199.08	4867.37	0.201036	2.72086e-05	1175.52	5847.3	0.294826	2.85781e-05	1767.15	5993.89	0.40101	0.000474509	2576.78	6425.72	0.430078	0.00258421	3074.36	7148.39	0.355334	0.00112031	2573.37	7242.11
NM_001031312.1	ING5	1.0331	0.780271	1008.1	975.809	2.37904	0.00185442	1583.37	665.55	2.66468	0.00759661	1260.98	473.218	5.71382	0.00211298	2113.91	369.964	5.18892	6.409e-06	2205.33	425.007	2.34763	0.00291199	786.038	334.821
NM_205372.1	IRF7	3.16726	0.0331511	143.175	45.2048	10.2275	0.0472187	148.334	14.5034	33.2283	0.0108975	518.139	15.5933	5.20057	0.393148	193	37.1112	0.788208	0.645042	20.8974	26.5126	4.09321	0.0192108	25.2647	6.17236
NM_205416.1	IRF8	0.952592	0.729606	124.157	130.336	1.23772	0.132562	144.286	116.575	2.62515	0.0315532	151.28	57.6271	1.92464	0.00221148	179.855	93.4488	2.4954	0.0230717	217.251	87.0606	5.0409	5.94991e-05	333.38	66.135
NM_001030338.1	IRX1	0.909536	0.543188	201.517	221.56	2.38956	0.0011309	289.268	121.055	1.24965	0.274509	227.011	181.659	1.69629	0.00247829	230.759	136.037	2.80477	0.0156485	300.232	107.044	7.86381	0.00135389	448.115	56.9845
NM_001030336.1	IRX2	0.349374	0.220964	5.24219	15.0045	8.39344	0.00845929	53.4264	6.36526	35.9941	0.00444338	53.0585	1.47409	30.4139	0.000631683	130.839	4.30195	201.112	0.000425912	340.509	1.69313	72.6699	8.105e-07	340.739	4.68886
XM_004949880.1	IVNS1ABP	0.883382	0.359407	1752.7	1984.08	1.25623	0.156223	1641.99	1307.08	1.94671	0.000414378	1821.93	935.903	2.6217	0.000685347	2273.48	867.177	3.32587	0.000117057	2893.81	870.09	2.57832	0.00110469	2086.04	809.069
XM_426001.4	KAT2B	2.21855	0.212853	72.4327	32.6487	4.70412	0.000420175	240.097	51.0399	9.106	9.52245e-05	215.261	23.6395	4.90281	0.00142353	184.031	37.5357	2.90628	1.03784e-06	138.823	47.7664	1.14747	0.201718	116.642	101.651
XM_422410.2	KDM4A	0.96577	0.643824	1514.47	1568.14	1.20798	0.0100218	1467.06	1214.48	1.44579	0.00356282	1655.24	1144.87	2.40347	0.00204484	2362.52	982.96	3.14185	9.23235e-05	2943.3	936.803	3.88389	2.00136e-05	2727.92	702.367
NM_001277825.1	KIAA2018	0.888206	0.46244	309.807	348.801	1.11962	0.248675	308.549	275.584	1.47502	0.000262817	316.6	214.642	2.29677	0.0026763	379.086	165.052	3.39648	0.00023979	444.027	130.732	3.63275	0.000316289	440.65	121.299
XM_417013.4	KLF5	1.06278	0.557897	6928.53	6519.24	0.583317	0.00231317	3934.78	6745.53	0.430286	0.000162739	2862.59	6652.77	0.343702	3.64682e-05	2119.93	6167.92	0.278678	0.000171775	1390.14	4988.35	0.345323	0.000243217	1349.73	3908.6
NM_001030969.1	KLF6	2.2208	0.0106545	572.372	257.733	1.43859	0.179793	677.32	470.822	1.16139	0.321712	563.689	485.358	0.646876	0.412245	401.417	620.547	0.341422	0.000313314	183.297	536.862	0.34735	0.0250275	237.166	682.789
NM_204829.1	LDB2	0.993624	0.945122	333.142	335.28	0.85644	0.49766	320.565	374.3	0.915789	0.549499	239.332	261.34	1.49854	0.0559574	272.001	181.511	2.53629	0.00661717	316.055	124.613	2.45845	0.00245848	202.391	82.3248
XM_004934489.1	LHX5	1.3129	0.824684	5.61136	4.27402	16.5319	0.00410875	16.5319	1	80.0913	8.34799e-05	161.659	2.01843	746.369	0.000977284	746.369	1	2401.74	0.0051709	2030.75	0.845533	2975.88	0.000337709	2975.88	1
NM_001031774.2	LIN28A	0.957621	0.197112	7074.37	7387.44	1.00052	0.991218	7959.58	7955.43	1.01212	0.759527	7687.33	7595.3	1.3119	0.0551136	9136.22	6964.1	1.50002	0.0883498	10512.4	7008.14	2.17499	0.00367314	14082.4	6474.68
NM_001034818.1	LIN28B	1.61564	0.00238579	1252.46	775.209	4.53774	1.17494e-05	1793.32	395.201	4.0943	1.10089e-05	1677.89	409.811	4.37497	0.00101508	1390.15	317.75	3.66516	0.0001264	1239.45	338.171	3.82407	6.10327e-06	1088.81	284.726
XM_003641297.2	LMO1	0.682163	0.336651	36.445	53.4257	0.626639	0.223074	16.9921	27.1163	1.02934	0.956208	28.9127	28.0888	4.61479	0.0836019	182.683	39.5864	14.0449	0.120357	591.908	42.144	41.6783	0.0101749	2884.72	69.2139
XM_004938645.1	LMO7	0.938662	0.743691	112.212	119.544	0.294055	0.0201931	47.9522	163.072	0.0816566	0.0109461	18.5403	227.053	0.0421636	0.00442159	15.3619	364.339	0.0469748	0.0178312	14.6468	311.801	0.177482	0.00391101	43.5601	245.433
NM_205358.1	LMX1B	0.707651	0.212461	91.2024	128.88	0.482291	0.0618626	48.2528	100.049	0.507049	0.0276349	53.8859	106.274	1.61744	0.0836884	136.948	84.6691	3.69017	0.0336092	443.96	120.309	13.9009	3.60088e-06	1779.49	128.013
NM_205025.1	MAFA	0.852577	0.47627	296.544	347.821	2.71244	0.0278473	834.044	307.488	3.59692	0.0218949	764.603	212.571	4.5693	0.000528321	701.492	153.523	2.4409	0.0011237	418.676	171.525	1.79983	0.0330453	180.756	100.43
XM_003640590.2	MAML2	0.860146	0.593485	180.586	209.948	0.584434	0.104073	105.957	181.298	0.772949	0.646467	118.793	153.689	2.04792	7.83004e-05	212.439	103.734	5.51159	0.000176426	276.865	50.2332	20.8797	0.00347371	437.658	20.961
NM_001079751.1	MBD3	0.958795	0.632407	3742.91	3903.77	1.05914	0.492688	3460.04	3266.84	1.18328	0.050611	3440.2	2907.35	1.73865	0.00386853	4394.29	2527.42	2.27931	2.51654e-05	5377.37	2359.21	2.78804	4.06744e-05	4719.5	1692.77
NM_001163376.1	MBNL2	0.822265	0.100122	459.643	558.997	0.249085	2.97806e-05	185.5	744.727	0.192486	3.16921e-05	134.959	701.133	0.16514	0.00116023	101.328	613.589	0.145625	0.00021737	82.7591	568.304	0.203175	0.00364963	103.068	507.287
XM_418042.4	MDFI	0.771988	0.185714	177.076	229.377	0.428285	0.0145583	63.8339	149.045	0.672242	0.0193303	88.0351	130.958	2.09417	0.00546303	219.817	104.966	2.87386	0.0666553	286.329	99.6322	6.86229	0.0022593	480.921	70.0817
ENSGALT00000023483.1	MEF2D	0.803621	0.00990339	885.313	1101.65	0.402589	3.03426e-05	557.159	1383.94	0.380426	7.28136e-05	489.099	1285.66	0.350153	0.000986409	496.612	1418.27	0.412479	0.00118676	534.81	1296.57	0.573207	0.0030355	636.168	1109.84
NM_001139477.1	MEIS1	1.69925	0.271377	126.657	74.5373	10.897	0.00548272	577.624	53.0079	8.54675	0.01056	510.193	59.6944	7.55189	0.00433214	370.395	49.0467	5.23418	0.013209	615.793	117.648	3.44053	0.00150936	1298.26	377.342
NM_204803.1	MEIS2	2.88651	0.267059	14.9766	5.18849	78.1298	0.00023964	153.066	1.95912	44.1076	0.00392627	243.103	5.51159	330.134	0.0032935	330.134	1	92.3967	0.00769728	680.454	7.36448	18.2305	0.350519	286.316	15.7053
XM_421144.4	MGA	1.41178	0.00234204	697.56	494.098	2.19568	0.000759549	958.544	436.559	1.57646	0.0121939	566.66	359.451	1.97121	0.00778496	545.063	276.512	2.79793	4.88425e-05	614.633	219.674	2.08478	0.00674951	451.239	216.444
NM_204129.1	MID1	0.788109	0.0689736	556.138	705.661	0.728959	0.096214	592.714	813.097	0.937151	0.293564	495.82	529.071	1.67918	0.0299969	771.98	459.736	1.9898	0.00245695	877.969	441.234	3.21542	0.000106767	1153.81	358.837
XM_416243.4	MKL1	0.423011	0.0780115	21.2158	50.1542	0.463552	0.0185609	36.2953	78.2983	0.363926	0.212458	26.735	73.4627	0.75081	0.496743	53.4849	71.2363	0.45142	0.000596134	48.1972	106.768	0.517356	0.00932804	44.0702	85.1836
XM_004949131.1	MLLT3	0.574902	0.311927	11.6363	20.2406	1.2249	0.658024	25.7331	21.0084	2.06706	0.177021	56.0063	27.0946	5.04443	0.00146542	64.9669	12.8789	3.86973	4.39126e-06	103.766	26.8149	3.60773	0.122103	63.1087	17.4926
XM_415149.4	MLXIP	1.11918	0.657234	172.008	153.691	2.10767	0.00557338	161.512	76.6308	2.88171	3.25658e-06	142.104	49.3125	3.94483	0.000906646	182.791	46.3367	4.76908	0.00103905	235.023	49.2807	6.4312	0.000187077	217.737	33.8563
NM_205488.1	MSX1	0.563249	0.00706718	3262.61	5792.49	0.184529	0.000349567	1213.25	6574.86	0.0774953	0.000398254	421.591	5440.21	0.0552328	1.41166e-05	304.171	5507.07	0.0495136	3.52684e-06	257.606	5202.73	0.163544	0.0039027	737.568	4509.91
NM_001012953.1	MTA1	1.17897	0.0108003	2390.61	2027.71	2.89945	9.90012e-05	5783.51	1994.69	3.45432	0.000153738	7391.58	2139.81	3.86163	0.00121395	7577.03	1962.13	3.5677	0.00113287	6916.81	1938.73	2.48352	9.98317e-06	4380.9	1763.99
ENSGALT00000022624.1	MYB	0.638826	0.275702	61.4128	96.1338	1.84386	0.00847466	324.813	176.159	1.85165	0.020691	218.305	117.898	3.2811	0.00228736	204.317	62.2709	2.60096	0.0119296	284.412	109.349	2.21881	0.366169	156.066	70.3378
NM_001030952.1	MYC	0.973261	0.841905	2584.13	2655.13	0.374121	1.23988e-05	1268.22	3389.87	0.29814	0.000135636	1173.75	3936.9	0.240309	0.000406483	1001.36	4166.96	0.250358	0.00117347	864.815	3454.31	0.599029	0.0719094	1384.11	2310.6
XM_004947887.1	MYCL1	1.33634	0.596157	29.4108	22.0085	2.54118	0.0198915	34.2646	13.4837	3.74212	0.0215679	36.3901	9.72445	1.81812	0.0252013	36.6258	20.1449	6.46006	0.077259	25.4543	3.94026	4.97477	0.038145	46.4101	9.32909
NM_001031091.1	MYCN	1.35093	0.210493	2628.11	1945.41	3.61938	0.0070072	3771.32	1041.98	2.59362	2.92861e-05	3380.55	1303.41	4.76289	0.000446786	3330.42	699.245	6.04247	5.13461e-06	3233.47	535.124	8.07099	0.0463752	1869.5	231.632
NM_001012927.1	MYSM1	1.11657	0.294739	268.352	240.337	0.983463	0.832163	226.225	230.029	1.10433	0.283132	201.048	182.053	1.45403	0.0200304	232.662	160.013	1.69233	0.00537265	253.538	149.816	1.76084	0.00781819	255.313	144.995
NM_204268.2	NAB1	1.06466	0.667677	234.825	220.564	2.39243	0.000477511	723.101	302.245	2.11956	0.00721813	678.851	320.279	1.25863	0.149862	402.235	319.581	0.940299	0.327934	344.88	366.777	0.7393	0.0145695	257.474	348.267
NM_001146142.1	NANOG	0.938765	0.423824	12533.2	13350.8	0.624339	0.0136032	8400.94	13455.7	0.59776	0.0254568	7422.62	12417.4	0.364246	0.000811292	4006.86	11000.4	0.211951	0.000101882	1964.79	9270.03	0.230414	0.00160829	950.957	4127.16
XM_001231577.3	NCOA2	1.01325	0.945431	785.566	775.292	0.494658	0.00528045	510.39	1031.8	0.552678	0.00228241	485.857	879.096	0.618721	0.0117967	575.86	930.726	0.720182	0.00526865	641.441	890.665	0.472258	0.0669869	504.789	1068.88
NM_204413.1	NFKB2	1.22908	0.173556	544.5	443.013	1.95184	0.0131121	723.101	370.471	2.88257	0.00241539	1113.97	386.45	1.68674	0.248028	712.588	422.465	0.847697	0.155893	434.259	512.281	0.932598	0.496828	462.785	496.232
NM_001199548.1	NKX6-2	1.14373	0.373901	1.14373	1	1	1	1	1	1	1	1	1	1	1	1	1	23.8295	0.115903	23.8295	1	139.896	0.00362664	139.896	1
XM_004944728.1	NR2C2	0.974367	0.721093	438.402	449.935	0.942149	0.36813	412.539	437.87	0.942374	0.256897	392.285	416.273	1.2665	0.0261378	430.999	340.306	1.22933	0.0123645	466.072	379.126	1.12302	0.780192	329.49	293.395
XM_004938351.1	NRIP1	2.33065	0.00893585	1849.72	793.648	9.20362	0.000246748	3639.19	395.409	4.56235	0.000112136	2258.65	495.064	3.1436	5.75414e-05	1272.14	404.676	1.98347	0.00226364	675.295	340.461	1.87601	0.014186	448.086	238.85
ENSGALT00000004699.1	NSD1	1	1	1	1	1	1	1	1	1	1	1	1	1	1	1	1	1	1	1	1	1	1	1	1
NM_204520.2	OTX2	5.54292	0.00105378	1591.35	287.096	26.7522	5.9242e-05	4626.17	172.927	6.83208	0.00087255	3180.38	465.507	15.9883	0.00118671	3327.49	208.12	16.8884	8.89e-07	4052.8	239.976	19.0987	3.11025e-06	3510.9	183.829
NM_205066.1	PAX6	0.280488	0.139642	8.00916	28.5543	0.135188	0.272158	1	7.39709	0.131586	0.196931	2.16703	16.4686	15.1704	0.00102517	19.2032	1.26583	3.36236	0.0373934	28.6229	8.51274	2.15032	0.00111492	100.581	46.7746
XM_004950821.1	PBX4	0.801478	0.468805	64.4373	80.398	1.22786	0.345613	66.5467	54.1972	1.74892	0.190726	73.091	41.7921	2.83154	0.0201003	99.8091	35.2491	2.96607	0.00240454	94.6283	31.9036	3.02612	0.000384097	113.422	37.4809
ENSGALT00000014159.1	PDCD4	1.0326	0.786526	1884.28	1824.79	0.859697	0.188371	1724.74	2006.21	0.83517	0.00687438	1318.09	1578.22	1.2181	0.206775	1775.14	1457.31	2.23628	0.0102929	2330.27	1042.03	4.94058	0.000139006	3625.81	733.884
XM_004942093.1	PDLIM1	0.988144	0.86656	681.515	689.693	0.759379	0.0655361	557.996	734.805	0.606873	4.37911e-05	558.496	920.286	0.512824	0.00055759	515.832	1005.87	0.391135	9.35299e-05	431.547	1103.32	0.347294	1.07775e-05	466.139	1342.2
NM_204839.1	PDLIM4	1.12312	0.648552	78.2659	69.6864	2.52443	0.00338403	107.162	42.4499	10.8511	0.00164633	469.629	43.2794	23.1384	4.867e-06	569.37	24.6071	22.3725	8.82742e-05	563.97	25.2081	90.9668	0.0341619	565.786	6.2197
ENSGALT00000037662.1	PDLIM5	1.02409	0.762872	1240.61	1211.42	0.595399	0.00506984	1015.24	1705.14	0.397258	0.00135783	488.532	1229.76	0.307012	0.00504661	336.567	1096.27	0.320162	0.00018641	301.159	940.645	0.454569	0.0728798	271.369	596.982
XM_004944998.1	PHF15	1.13816	0.173972	484.122	425.357	1.52954	0.0772321	473.022	309.259	2.85866	0.00597097	835.85	292.392	3.89856	1.3648e-05	982.604	252.043	3.47593	1.18561e-05	829.79	238.725	2.39328	0.0123207	421.758	176.226
XM_418005.4	PHTF1	0.812352	0.195054	287.913	354.419	1.6543	0.00244897	598.877	362.012	1.70997	0.000478059	594.07	347.415	2.27981	0.00117883	652.642	286.271	2.86657	0.000702943	801.318	279.539	3.17057	0.036999	565.83	178.463
NM_205010.1	PITX2	0.513547	0.0516404	118.277	230.315	0.168187	0.00464655	38.1415	226.78	0.0196483	0.0443604	6.0229	306.535	0.0094615	0.00428039	2.92423	309.066	0.0495224	0.00015272	13.2201	266.952	0.0905498	0.058245	12.3864	136.791
NM_001006457.1	PPARGC1A	0.548704	0.0793616	329.428	600.375	0.113232	4.3841e-05	105.172	928.819	0.116487	0.00122009	90.7496	779.052	0.125775	0.00096231	84.7327	673.683	0.131033	5.11969e-05	63.7079	486.196	0.156129	0.00266518	46.3405	296.81
ENSGALT00000036696.1	PRDM14	2.14944	0.0386406	349.91	162.792	4.29434	0.0355993	688.309	160.283	3.3917	0.00622056	526.474	155.224	9.25767	0.00221345	560.733	60.5696	20.4016	0.000950916	356.147	17.4568	122.497	0.00718356	219.005	1.78784
NM_001277741.1	PTTG1	1.00372	0.965592	2333.87	2325.21	1.16407	0.091793	2345.77	2015.15	1.36054	0.0103492	2365.08	1738.34	1.61746	0.00552887	2517.49	1556.45	2.28283	1.76006e-05	2824.12	1237.11	2.47057	0.00612457	2568.4	1039.6
XM_004941476.1	RASSF7	0.714428	0.145137	119.195	166.839	0.224302	0.000684239	51.8525	231.173	0.192986	0.00087439	31.7703	164.625	0.267477	0.00459639	47.5702	177.848	0.331497	5.40018e-05	68.0117	205.165	0.479552	0.0866961	77.5978	161.813
XM_418212.2	RFX2	0.319856	0.0553797	5.82668	18.2166	0.293178	0.181236	8.54375	29.1419	0.764107	0.710431	9.8353	12.8716	3.57932	0.000347017	29.1076	8.13216	4.75651	0.0039183	69.6661	14.6465	6.02033	0.00557749	66.9566	11.1217
XM_003642990.2	RFX3	1.18572	0.442562	278.431	234.821	1.57563	0.0149003	494.879	314.083	2.10491	0.0016417	451.865	214.672	4.04061	0.000246546	463.375	114.679	5.01088	7.38334e-05	584.861	116.718	4.62002	0.000548565	578.526	125.222
NM_001030623.2	RNF14	1.23503	0.243199	257.151	208.214	1.52114	0.0028946	409.602	269.273	1.51315	0.00192844	432.69	285.953	1.72963	0.00497299	398.169	230.206	1.56582	0.0419451	425.566	271.786	1.32722	0.544222	243.944	183.801
NM_205049.1	RREB1	0.933139	0.65772	1373.47	1471.88	0.333375	0.000375908	842.786	2528.04	0.239184	0.00018092	527.605	2205.85	0.13468	0.000111495	290.795	2159.16	0.0957545	1.29857e-07	204.39	2134.52	0.231105	0.000312346	441.749	1911.47
NM_204744.1	RUNX1T1	3.91877	0.0107872	560.905	143.133	35.1009	4.08167e-05	1309.02	37.2931	9.4301	5.74849e-06	719.36	76.2834	65.2492	3.09436e-06	453.347	6.94793	328.626	0.00571927	328.626	1	15.5322	0.164502	101.133	6.51116
NM_204707.1	SALL1	1.08138	0.145899	3961.12	3663.03	1.21461	0.0244058	5047.03	4155.28	1.25359	0.0480364	4404.87	3513.8	1.3406	0.0608989	3279.43	2446.24	2.29456	0.001181	3977.89	1733.62	5.95294	7.57775e-06	4928.22	827.863
NM_204647.1	SALL3	0.531033	0.00175498	43.4205	81.7661	0.528776	0.0161698	70.9126	134.107	0.928773	0.734032	64.8732	69.8483	2.54001	0.00363477	152.798	60.1563	3.82929	5.2597e-05	229.04	59.8127	4.97961	9.0406e-05	316.127	63.4842
XM_004936485.1	SAMD4A	0.944864	0.871479	58.0599	61.448	1.90514	0.111505	105.728	55.4965	3.14009	0.0385113	119.04	37.9098	1.89033	0.0448106	77.5301	41.0141	1.67156	0.0936349	82.1329	49.1354	3.55985	0.00465046	78.6785	22.1017
XM_004934693.1	SCML2	0.905103	0.604461	280.644	310.068	0.550734	0.00865596	195.822	355.566	0.441054	0.000804534	196.946	446.536	0.416964	0.00132552	167.566	401.872	0.436669	0.000125911	221.204	506.571	0.419018	0.0868902	262.822	627.232
NM_001030661.1	SETD1B	0.880969	0.432961	417.564	473.982	1.02594	0.770603	378.992	369.41	1.16865	0.297803	381.527	326.468	1.28148	0.00329996	405.947	316.781	1.69913	0.00260034	439.697	258.778	2.12124	0.00756434	526.167	248.047
ENSGALT00000008839.1	SETD2	1.05985	0.388543	1404.44	1325.13	1.73911	0.00168831	1829.97	1052.24	2.10786	0.000721218	2233.36	1059.54	3.30051	0.00197446	3272.74	991.585	4.73078	0.000101477	4052.71	856.67	6.08465	0.000850964	4518.49	742.605
XM_004943705.1	SIN3A	0.920693	0.338274	898.856	976.281	0.978836	0.790829	860.467	879.072	1.21363	0.023032	832.495	685.953	1.76986	0.0028629	1093.55	617.872	2.29676	0.00414625	1217.53	530.11	2.55908	0.000627324	1198.8	468.448
NM_001044685.1	SIX1	0.741741	0.374063	56.1962	75.7626	0.207333	0.000205157	32.5371	156.932	0.230237	0.000933255	30.3035	131.618	0.342183	0.0483208	45.4155	132.723	0.78078	0.382341	119.199	152.666	4.21668	0.00463072	309.8	73.47
NM_204364.1	SIX3	1.61697	0.734118	8.79723	5.44056	4.79391	0.0593065	4.38114	0.913897	41.2193	0.00258366	41.2193	1	271.298	0.011757	271.298	1	839.007	0.0282275	1353.43	1.61313	3122.58	9.18399e-05	3122.58	1
NM_204561.1	SMAD2	0.938971	0.412694	751.256	800.084	1.17823	0.0136711	849.585	721.071	1.28835	0.0138552	790.468	613.553	1.55244	0.0166306	799.94	515.279	1.82724	0.00139994	913.396	499.877	1.82627	0.00178386	861.697	471.833
NM_205139.1	SMARCA2	0.912493	0.766241	181.525	198.933	0.404091	0.00563675	110.309	272.981	0.21149	2.27849e-05	65.7228	310.761	0.114108	0.0085773	34.019	298.131	0.119336	6.97136e-05	32.8412	275.199	0.318573	0.00250009	99.8864	313.544
XM_003643118.2	SMARCD1	0.972183	0.656304	1518.49	1561.94	1.15387	0.072531	1851.68	1604.76	1.30455	0.00152697	1826.86	1400.37	1.96007	0.00117046	2167.62	1105.89	2.34485	4.2404e-05	2534.91	1081.06	2.55338	0.00199032	2334.32	914.208
NM_205142.1	SNAI1	2.29027	0.00636243	179.491	78.3713	5.61326	0.00532048	529.357	94.3047	7.24262	0.00775124	619.777	85.5735	5.48928	0.000385669	623.823	113.644	4.09557	0.00014322	509.726	124.458	2.79995	0.053545	215.387	76.9254
NM_204333.1	SOX1	1.32577	0.373901	1	0.754279	1	1	1	1	1	1	1	1	2.56518	0.122217	2.56518	1	30.6217	0.064121	30.6217	1	254.115	0.00213561	254.115	1
NM_205187.1	SOX11	1	1	1	1	23.672	0.010891	23.672	1	10.4244	0.196752	10.4244	1	7.40038	0.000135923	7.40038	1	7.58111	0.0875745	7.58111	1	15.9812	0.00104583	15.9812	1
XM_003642722.2	SOX13	4.81209	0.373901	4.81209	1	2.51306	0.373901	2.51306	1	1.44731	0.373901	1.44731	1	1	1	1	1	1	1	1	1	0.72777	0.373901	0.72777	1
NM_205188.1	SOX2	0.548203	0.492105	17.9589	32.7596	13.0438	7.5715e-05	110.545	8.47493	19.3559	6.87206e-05	349.458	18.0543	75.163	0.00129998	1133.48	15.0803	359.42	0.00985331	2879.73	8.01216	608.027	0.000458919	4098.64	6.74089
NM_204195.1	SOX3	1.3204	0.15362	740.486	560.803	2.45	0.00229251	1128.17	460.478	2.17647	0.000286029	1075.35	494.08	3.19184	0.000372865	1117.54	350.124	3.38589	0.000372281	1129.34	333.544	2.3951	0.0076567	518.909	216.655
NM_204484.1	SOX4	2.05844	0.00164754	1625.64	789.745	3.00755	0.000848539	1897.05	630.763	3.09521	0.0016533	1732.17	559.63	4.5927	9.12106e-05	2013.15	438.337	7.02592	7.99242e-07	2744.33	390.6	8.9378	0.00104225	2841.59	317.93
NM_204281.1	SOX9	0.724556	0.688586	5.61136	7.74454	0.198133	0.354573	1.66986	8.42796	0.546804	0.644417	3.1872	5.82878	0.308713	0.420788	1.32807	4.30197	2.66799	0.478589	31.4465	11.7866	1.57533	0.613349	11.0958	7.04347
ENSGALT00000017736.1	SP4	0.851253	0.108854	593.216	696.874	0.908412	0.202655	529.954	583.386	1.2537	0.0923089	608.325	485.225	2.15793	0.00051057	891.049	412.917	2.9719	0.0001255	1097.84	369.407	3.57498	0.000197441	1006.9	281.653
XM_003641470.2	STOX1	1.5432	0.724202	7.20989	4.67205	16.4539	0.155892	16.4539	1	36.3725	0.00175963	36.3725	1	90.4667	0.00024972	90.4667	1	95.169	0.007423	95.169	1	133.665	0.0506496	133.665	1
ENSGALT00000017319.1	STOX2	0.791652	0.19519	161.799	204.381	1.94882	0.00348979	279.552	143.446	2.5723	0.000723624	253.916	98.7115	2.91586	0.00300748	310.378	106.445	2.91638	0.116656	308.655	105.835	6.8288	0.0117814	635.057	92.9968
NM_204940.1	T	8.80843	0.373901	8.80843	1	35.1371	0.341955	34.9324	0.994176	5.95133	0.134664	5.95133	1	25.2038	0.0103744	25.2038	1	111.932	0.0406673	111.932	1	197.965	0.0852883	197.965	1
XM_414389.4	TADA3	1.0011	0.990407	528.933	528.35	0.885716	0.0514183	556.022	627.766	0.66808	0.00131596	501.689	750.942	0.631099	0.00808319	468.166	741.827	0.60683	0.000148301	506.965	835.431	0.634419	0.00140709	476.263	750.707
NM_001031369.1	TBL1XR1	1.06413	0.44034	540.848	508.256	2.71101	0.00404871	778.868	287.298	3.73356	0.000174046	757.1	202.783	5.91914	9.89558e-05	917.561	155.016	8.21454	4.71453e-05	1132.91	137.915	10.1619	3.85027e-06	1154.75	113.635
ENSGALT00000010560.1	TBX3	0.727971	0.117735	229.005	314.58	0.0765791	0.00318615	55.2107	720.964	0.056098	3.23537e-06	53.8344	959.649	0.0221613	0.000204256	30.701	1385.35	0.012518	0.000252373	20.0859	1604.56	0.0207558	0.00168659	39.7825	1916.69
NM_205375.2	TCF12	0.967164	0.779811	4814.55	4978	1.62922	0.0101339	7826.67	4803.95	2.007	0.000122549	9271.01	4619.33	2.45925	0.00169746	9433.55	3835.95	2.62911	0.000199091	10223.5	3888.59	3.11774	0.00505281	9199.75	2950.78
NM_204547.1	TCF7	1.36105	0.407257	44.8885	32.9808	33.9304	0.0165903	166.581	4.90949	16.6422	0.00329663	159.272	9.57035	13.5919	0.00290572	263.384	19.378	26.3213	0.00177392	344.637	13.0935	19.5901	1.62253e-05	415.367	21.2029
XM_003643906.2	TCF7L1	1.0489	0.207566	457.06	435.753	2.2902	0.000218388	1006.96	439.683	2.86047	7.44308e-05	1243.75	434.806	3.83146	0.000344361	1509.23	393.904	3.62753	0.0279925	1319.54	363.757	4.35179	0.0164262	1458.23	335.088
NM_001206510.2	TCF7L2	0.960397	0.738918	794.265	827.017	1.45824	0.146015	1128.79	774.077	1.91642	0.00304876	937.243	489.058	2.79118	0.000536111	1352.65	484.617	5.50584	0.00218681	1779.22	323.151	6.96726	1.94528e-05	2135.31	306.477
NM_205094.1	TFAP2A	0.801848	0.0211299	5447.89	6794.17	0.294681	1.78798e-05	2253.4	7646.9	0.285203	6.67122e-05	1953.84	6850.69	0.27695	0.000353639	1686.96	6091.22	0.311941	1.88791e-05	1587.48	5089.06	0.581192	0.0560371	2172.71	3738.36
XM_003642494.2	TFAP2C	1.26638	0.00256237	2488.8	1965.28	1.83374	0.00332905	2508.18	1367.8	1.74407	0.00388176	1993.2	1142.85	1.30381	0.0234027	1295.97	993.987	0.752836	0.0703192	766.009	1017.5	0.495296	0.00604898	513.251	1036.25
XM_422087.4	TFCP2L1	0.471049	0.249333	14.3205	30.4013	0.0535408	0.0311985	5.78837	108.111	0.0178603	0.0465034	0.751347	42.0679	0.39663	0.404374	1.08897	2.74556	0.49089	0.29322	22.9253	46.7014	0.308947	0.318908	10.2313	33.1167
NM_205379.1	TGIF1	1.74868	0.00048987	4973.26	2844	2.65145	0.00184358	4442.57	1675.53	2.71921	0.000169199	3576.02	1315.1	3.89153	0.000258295	3343.94	859.288	4.77798	2.402e-05	3154.72	660.262	4.17116	0.000936782	2104.13	504.448
XM_004946975.1	TOX2	0.686009	0.373101	106.943	155.891	0.914846	0.751849	103.68	113.331	1.90757	0.0237409	253.693	132.993	2.38128	0.0017608	362.987	152.434	2.29306	0.00669705	392.469	171.155	1.93095	0.00385046	296.068	153.327
ENSGALT00000005929.1	TOX3	0.675708	0.444987	19.3309	28.6084	2.89454	0.0519118	51.7464	17.8772	8.13273	0.0156946	48.8667	6.00865	7.28954	8.47065e-05	75.7549	10.3923	19.0033	0.00177213	128.475	6.76064	30.7867	0.000254823	224.499	7.29206
ENSGALT00000020916.1	TRIM24	1.57548	0.00608791	1462.74	928.445	3.65022	0.000369226	2139.21	586.051	3.23377	2.2907e-05	1787.98	552.91	4.15407	0.00173707	1532.97	369.028	5.39264	0.000356178	1454.06	269.639	5.18276	0.0868664	713.609	137.689
XM_422922.4	TRIM3	0.954516	0.708441	589.619	617.715	0.51263	0.000339978	447.255	872.471	0.40236	2.81885e-05	381.181	947.362	0.392309	0.000319297	405.03	1032.42	0.323007	0.000698478	391.843	1213.11	0.372888	0.00963514	541.418	1451.96
XM_421468.4	TRIM9	0.564984	0.378432	11.4932	20.3425	1.7955	0.115864	18.3572	10.224	7.34472	0.00671135	18.8228	2.56276	5.70252	0.00918923	32.7814	5.74859	10.8968	0.0667327	49.6144	4.55311	34.5968	0.00073288	76.2227	2.20318
XM_004940683.1	VGLL1	0.843091	0.140313	832.031	986.882	0.165552	0.000304901	183.798	1110.21	0.0491562	9.98551e-06	53.8833	1096.17	0.0452741	0.000111954	53.4369	1180.3	0.0162713	9.17308e-06	18.1383	1114.74	0.0228081	2.89618e-05	24.5516	1076.44
NM_001145990.1	VGLL2	0.614703	0.114837	109.32	177.842	0.66285	0.118697	175.405	264.622	0.768835	0.135478	183.27	238.374	0.87655	0.348113	139.128	158.722	0.729327	0.231986	103.585	142.028	1.37342	0.696555	75.2727	54.8068
ENSGALT00000025327.1	WHSC1	0.921507	0.377162	1474.56	1600.16	1.11109	0.120638	1549.36	1394.45	1.415	0.00747552	1456.28	1029.17	2.14796	0.0049034	1741.74	810.882	2.75609	0.00536283	1962.11	711.919	2.7316	0.0456255	1597.69	584.891
ENSGALT00000016197.1	YEATS4	0.951035	0.586223	650.615	684.113	1.9062	0.00594195	1010.32	530.019	3.07147	0.00339935	1601.83	521.519	6.09248	0.000327093	2610.92	428.549	7.12636	2.88187e-05	3329.89	467.264	4.80447	0.0243212	1923.49	400.354
XM_001234834.1	ZBTB1	1.60853	0.0502242	163.058	101.371	2.53061	0.000966245	255.429	100.936	2.92424	0.000294605	224.697	76.8394	2.92622	0.00127556	225.985	77.2277	3.44388	0.000371131	300.221	87.1753	4.05571	0.00814632	259.532	63.9917
XM_004947124.1	ZBTB46	0.909165	0.287535	373.539	410.859	0.484918	0.025688	348.008	717.664	0.511705	0.0022196	316.244	618.019	0.541896	0.012145	351.445	648.548	0.603882	0.0441624	377.81	625.636	0.509359	0.000885604	365.709	717.979
ENSGALT00000020339.1	ZEB2	0.879026	0.841054	1.61501	1.83728	1.00586	0.373901	1	0.994176	6.29256	0.0646274	12.7011	2.01843	197.616	0.0202779	197.616	1	554.027	0.0158017	725.211	1.30898	107.451	0.00127094	1621.47	15.0903
XM_414230.4	ZFHX3	1.00625	0.967661	779.545	774.704	0.554862	0.00307703	428.155	771.644	0.394784	7.76143e-05	323.432	819.264	0.337709	0.00436888	287.191	850.411	0.344412	0.000526592	324.163	941.206	0.434296	0.000624825	555.169	1278.32
ENSGALT00000026439.1	ZHX2	1.04741	0.782357	231.902	221.406	1.77873	0.00633904	219.391	123.341	2.20154	3.19869e-05	313.494	142.397	3.79545	0.000109418	431.052	113.571	5.12066	0.00157436	631.465	123.317	5.57738	0.000224538	691.177	123.925
NM_204254.1	ZIC1	1	1	1	1	1	1	1	1	1	1	1	1	10.8601	0.183114	10.8601	1	118.116	0.0836313	118.116	1	567.158	0.00193403	567.158	1
XR_026941.1	ZIC2	5.50513	0.239793	22.2416	4.04016	115.698	3.41969e-05	226.667	1.95912	551.496	0.000723797	812.955	1.47409	1385.48	0.000610639	1564.81	1.12944	753.891	0.00268914	3303.64	4.38212	2012.72	0.00232442	5209.82	2.58845
ENSGALT00000010497.1	ZIC3	5.61828	0.00322968	350.761	62.4321	215.279	0.000264835	2111.77	9.80946	134.378	0.000623241	2634.46	19.6048	5021.27	0.00125777	5021.27	1	801.343	0.00357633	6248.27	7.79725	6898.73	0.00238279	6898.73	1
XM_004940633.1	ZMYM3	0.754258	0.150508	90.7233	120.281	0.727671	0.0128573	86.6332	119.055	0.937987	0.849681	86.2616	91.9645	2.10447	0.00138248	119.526	56.7965	3.15211	0.00294231	169.311	53.7136	3.69285	0.0011855	180.505	48.8795
XM_004939164.1	ZMYND11	0.930972	0.764393	181.001	194.421	0.410914	0.00301373	70.6027	171.819	0.425805	0.00852939	61.9568	145.505	0.239787	0.00152483	42.3959	176.806	0.376784	0.00151202	48.724	129.315	0.533275	0.0492886	105.612	198.044
XM_429143.4	ZNF131	0.959557	0.845687	285.695	297.736	0.871493	0.565517	262.416	301.111	1.11921	0.330737	283.874	253.638	1.52696	0.123635	288.996	189.263	1.77223	0.0411159	383.74	216.529	1.66945	0.160876	300.235	179.84
ENSGALT00000012104.1	ZNF185	0.882174	0.304307	1740.2	1972.63	0.31206	2.4722e-05	1013.09	3246.46	0.155634	3.57111e-06	465.924	2993.71	0.127284	7.11612e-05	336.138	2640.85	0.102428	4.60412e-05	260.648	2544.68	0.099324	0.000296579	222.05	2235.62
NM_001195469.1	ZNF277	0.972643	0.839768	359.313	369.419	1.52019	0.0216719	481.516	316.747	2.32129	0.0044484	576.369	248.297	2.7629	0.00182658	675.13	244.356	2.93818	1.91971e-05	668.902	227.659	2.29642	0.00886957	441.437	192.228
XM_425046.4	ZNF367	1.3996	0.373901	1	0.714491	1	1	1	1	1	1	1	1	0.849135	0.373901	0.849135	1	1	1	1	1	1	1	1	1
XM_004948613.1	ZNF385C	0.644912	0.651647	2.41428	3.74359	1	1	1	1	15.4027	0.00989555	15.4027	1	50.141	0.0285681	50.141	1	78.002	0.0039562	78.002	1	95.8602	0.00734067	95.8602	1
XM_004948755.1	ZNF414	0.829075	0.449367	84.4461	101.856	1.09792	0.58578	114.752	104.518	1.27092	0.070066	103.308	81.2867	2.19857	0.00151419	100.871	45.8801	1.94359	0.0301516	126.157	64.9095	1.84723	0.0138977	159.695	86.4509
ENSGALT00000006188.1	ZNF423	0.802147	0.08281	448.038	558.549	1.0922	0.540154	489.305	448.001	1.35608	0.0525976	480.625	354.421	2.24778	0.0109282	750.459	333.866	3.90093	0.00631357	1212.7	310.875	8.15834	0.00257409	1893.93	232.146
ENSGALT00000024915.1	ZNF462	1.49044	0.00102222	2286.87	1534.36	9.32662	0.00171331	6527.72	699.902	9.50006	0.000393555	6525.4	686.88	13.5795	3.93366e-05	6311.31	464.768	18.7953	2.82229e-05	5667.31	301.528	11.4012	0.000259228	4480.38	392.973
XM_004944286.1	ZNF469	0.0748407	0.226369	0.815746	10.8998	36.2543	0.0431378	36.2543	1	124.523	0.00647731	124.523	1	105.606	1.57385e-05	105.606	1	11.5678	0.00226879	45.8951	3.9675	26.9305	0.00425569	26.9305	1
XM_414126.2	ZNF507	0.822471	0.297856	160.886	195.613	0.644937	0.0100283	119.853	185.837	1.06393	0.527006	148.252	139.344	2.39393	0.0383038	147.373	61.5611	2.59304	0.0302506	253.805	97.8792	1.66255	0.552179	102.087	61.4043
XM_419095.2	ZNF516	0.976563	0.896816	230.365	235.893	1.06468	0.710861	195.188	183.33	1.78327	0.00171849	311.996	174.958	2.45499	0.00221061	457.53	186.367	3.27192	9.47878e-06	568.785	173.839	3.89314	0.0350215	468.727	120.398
XM_004939809.1	ZNF521	0.939349	0.730905	492.264	524.048	1.14987	0.120292	489.984	426.123	2.15642	0.00200338	667.993	309.77	3.26811	0.000654932	928.869	284.222	4.81175	0.00033774	1354.95	281.591	5.63992	0.000111226	1470.58	260.746
XM_004944355.1	ZNF821	0.969714	0.741033	116.882	120.533	0.923857	0.366302	161.245	174.534	1.29992	0.204501	172.461	132.67	1.72619	0.0237227	227.263	131.656	1.92069	0.000998757	263.137	137.001	2.47859	0.00648145	233.465	94.1926

## Sheet: GRN candidate NI genes
Supplementary Table. candidate NI gene information
no.	ensembl ID galGal5	ID	Gene	synonym	chr galGal5	ctcf insulate region start	ctcf insulate region end	ctcf insulate region size	DNA binding	known motif	binding motif experiment	type	protein class	molecular function	biiological process	protein function	family	non-DNA binding TF	coregulation	DREiVe output	chr galGal5	strand	functional domains	NanoString probe
1	ENSGALG00000043935	XM_004941100.1	AFF1		chr4	46020321	46121036	100715	N			TR		Transferase	Ubl conjugation pathway	Scaffold subunit of some HBO1 complexes, which have a histone H4 acetyltransferase activity 1. Acts as a E3 ubiquitin-protein ligase mediating the ubiquitination and subsequent proteasomal degradation of target protein histone demethylase KDM1A 2. Also acts as a ubiquitin ligase E3 toward itself. Positive regulator of neurogenesis (By similarity).				done	chr4	-
2	ENSGALG00000016531	NM_001031096.1	ASXL2		chr3	105027462	105350116	322654	N			TF	C2H2 zinc finger factors	DNA-binding, Methyltransferase, Repressor, Transferase	Adaptive immunity, Immunity, Innate immunity, Transcription, Transcription regulation	The protein binds specifically to the PRDI (positive regulatory domain I element) of the beta-IFN gene promoter.	PcG	involve differential recruitment of acetylated and methylated histone H3	PPARG	done	chr3	-	ASXH,HARE-HTH,PHD_3
3	ENSGALG00000015196	XM_419185.4	ASXL3		chr2	106943759	107568664	624905	N			TF	Transcription factors	Activator, Developmental protein, DNA-binding	Transcription, Transcription regulation	This gene is a member of the caudal-related homeobox transcription factor gene family. The encoded DNA-binding protein regulates intestine-specific gene expression and enterocyte differentiation.	PcG			done	chr2	+	ASXH,HARE-HTH,PHD_3
4	ENSGALG00000025887	XM_419429.2	ATF3		chr3	21860062	22067738	207676	Y	Y	HT-SELEX	TF	Transcription factors	Developmental protein, DNA-binding			B-ATF-related factors			time out	chr3	-	BZIP_1
5	ENSGALG00000011814	NM_001012813.1	ATF7IP		chr1	48814781	49084320	269539	N			TF	Transcription factors	Activator, Developmental protein, DNA-binding	Transcription, Transcription regulation	This gene is a member of the caudal-related homeobox transcription factor gene family. The encoded protein is a major regulator of intestine-specific genes involved in cell growth an differentiation.		involved in histone modification	SETDB1, MBD1,TFIIE-alpha, TFIIE-beta,SP1	done	chr1	+	ATF7IP_BD,fn3_4
6	ENSGALG00000015828	XM_004938377.1	BACH1		chr1	104070799	104457004	386205	Y	Y	ChIPseq	TF	Transcription factors	Developmental protein, DNA-binding, Repressor	Differentiation, Transcription, Transcription regulation	Transcription factor with important functions in the development of the eye, nose, central nervous system and pancreas. Required for the differentiation of pancreatic islet alpha cells (By similarity). Competes with PAX4 in binding to a common element in the glucagon, insulin and somatostatin promoters. Regulates specification of the ventral neuron subtypes by establishing the correct progenitor …	Jun-related factors::Maf-related factors			no homologous regions	chr1	+	BTB,bZIP_Maf
7	ENSGALG00000010030	XM_004941760.1	BAZ1A		chr5	35904236	36071581	167345	N			TF	Transcription factors	Activator, DNA-binding	Differentiation, Transcription, Transcription regulation	This intronless gene encodes a transcription factor that contains a basic leucine zipper (bZIP) domain. The encoded protein functions as a homodimer but can also form heterodimers with CCAAT/enhancer-binding proteins alpha, delta, and gamma.		chromatin remodeling		done	chr5	-	Bromodomain,DDT,PHD,WHIM1,WSD
8	ENSGALG00000034048	NM_001031031.1	BCL11A		chr3	1583340	1919038	335698	N			TF	Transcription factors	Activator, DNA-binding	Apoptosis, Transcription, Transcription regulation	Binds to the consensus sequence 5'-AGAGTG-3' and has transcriptional activator activity (By similarity).				done	chr3	-	zf-C2H2
9	ENSGALG00000008308	NM_001277144.1	BHLHE40		chr12	18575349	18637342	61993	Y	Y	HT-SELEX	TF		Developmental protein, DNA-binding			Hairy-related factors			done	chr12	+	Hairy_orange,HLH
10	ENSGALG00000015388	ENSGALT00000024824.1	BLIMP1	PRDM1;ENSG00000057657 (human)	chr3	68437945	68532093	94148	Y	Y	ChIPseq	TF	Transcription factors	DNA-binding, Methyltransferase, Transferase	Transcription, Transcription regulation	Directly up-regulates the expression of pluripotency gene POU5F1 through its proximal enhancer.	More than 3 adjacent zinc finger factors			done	chr3	-	SET
11	ENSGALG00000041267	NM_001007988.1	BMI1		chr2	17521478	17949189	427711	N			TF	Transcription factors	Activator, Developmental protein, DNA-binding	Osteogenesis, Transcription, Transcription regulation	a member of a homeobox transcription factor gene family	PcG	histone modification		done	chr2	-	RAWUL
12	ENSGALG00000037646	NM_001006148.1	BRD8		chr13	10028086	10091079	62993	N			TF	Plasma proteins Transcription factors	Activator, DNA-binding	Cell cycle, Transcription, Transcription regulation	Transcription activator that binds DNA cooperatively with DP proteins through the E2 recognition site, 5'-TTTC[CG]CGC-3' found in the promoter region of a number of genes whose products are involved in cell cycle regulation or in DNA replication. The DRTF1/E2F complex functions in the control of cell-cycle progression from g1 to s phase. E2F2 binds specifically to RB1 in a cell-cycle dependent ma…		components of the NuA4 histone acetyltransferase		done	chr13	+	Bromodomain
13	ENSGALG00000039595	XM_004937809.1	BTBD11		chr1	53405160	53598063	192903	N			TR				Required for the activation of AURKB and chromosomal congression during mitosis where it stimulates microtubule polymerization.		protein heterodimerization activity		done	chr1	-	Ank,Ank_2,BTB
14	ENSGALG00000033813	XM_004936422.1	BTBD6		chr5	52829148	52912813	83665	N			TF	Transcription factors	Activator, DNA-binding	Transcription, Transcription regulation	Transcriptional activator (By similarity). Binds a GC box motif. Could play a role in B-cell growth and development.				no homologous regions	chr5	-	BACK,BTB,PHR
15	ENSGALG00000003096	NM_001011689.1	CBFA2T2	MTGR1	chr20	2241597	2271538	29941	N			TF	Transcription factors	Activator, DNA-binding	Cell cycle, Transcription, Transcription regulation	Transcription activator that binds DNA cooperatively with DP proteins through the E2 recognition site, 5'-TTTC[CG]CGC-3' found in the promoter region of a number of genes whose products are involved in cell cycle regulation or in DNA replication.		MYND-type Zinc finger, Transcriptional corepressor	PRDM14, Oct4	done	chr20	-	NHR2,TAFH,zf-MYND
16	ENSGALG00000033926	NM_204332.1	CBX1		chr27	4159751	4191709	31958	N			TF	Transcription factors	Activator, DNA-binding	Transcription, Transcription regulation	Transcription factor that activates the LYN and BLK promoters. Appears to be required for the T-cell-receptor-mediated trans activation of HIV-2 gene expression. Binds specifically to two purine-rich motifs in the HIV-2 enhancer.		Recognizes and binds histone H3 tails methylated at 'Lys-9'		done	chr27	+	Chromo,Chromo_shadow
17	ENSGALG00000023338	XM_423911.4	CBX2		chr18	9709908	9731885	21977	N			TF	Transcription factors	Activator, Developmental protein, DNA-binding	Adaptive immunity, Differentiation, Gastrulation, Immunity, Transcription, Transcription regulation		PcG	histone modification		done	chr18	-
18	ENSGALG00000012218	NM_001278149.1	CBY1		chr1	50881042	50885438	4396	N			TF	Transcription factors	Activator, DNA-binding, Receptor	Transcription, Transcription regulation			inhibit the wingless/Wnt pathway by binding to beta-catenin and inhibiting beta-catenin-mediated transcriptional activation		no homologous regions	chr1	-	Chibby
19	ENSGALG00000007555	NM_205381.1	CCND1		chr5	17507554	17566955	59401	N			TF	Transcription factors	DNA-binding	Transcription, Transcription regulation					done	chr5	+	Cyclin_C,Cyclin_N
20	ENSGALG00000040833	XM_423365.4	CDCA7		chr7	30586172	30677690	91518	N			TF	Predicted intracellular protein			May be involved in gene regulation within neural lineage cells potentially by direct DNA binding or by binding to other transcription factors.			Myc	done	chr7		zf-4CXXC_R1
21	ENSGALG00000025743	NM_001030642.1	CDR2		chr14	8725454	8766754	41300	N			TR		Transferase	Transcription, Transcription regulation, Ubl conjugation pathway	The protein encoded by this gene contains a RING zinc finger, a motif known to be involved in protein-protein interactions.				done	chr14
22	ENSGALG00000026295	XM_426243.4	CDR2L		chr18	10670614	10753799	83185	N			TR		Repressor	Translation regulation	Sterile alpha motifs (SAMs) in proteins such as SAMD4A are part of an RNA-binding domain that functions as a posttranscriptional regulator by binding to an RNA sequence motif known as the Smaug recognition element, which was named after the Drosophila Smaug protein				no homologous regions	chr18	+
23	ENSGALG00000005679	NM_204676.2	CDX1		chr13	13216389	13300979	84590	Y	Y		TF	Transcription factors	DNA-binding	Cilium biogenesis/degradation, Differentiation, Spermatogenesis, Transcription, Transcription regulation	Recognizes and binds the X-box, a regulatory motif with DNA sequence 5'-GTNRCC(0-3N)RGYAAC-3' present on promoters				done	chr13	-	Caudal_act,Homeodomain
24	ENSGALG00000034983	NM_204311.1	CDX2		chr1	176034444	176101227	66783	Y	Y		TF	Transcription factors	Developmental protein, DNA-binding, Repressor	Differentiation, Transcription, Transcription regulation	Essential for the differentiation of nodal monocilia and left-right asymmetry specification during embryogenesis. Required for the biogenesis of motile cilia by governing growth and beating efficiency of motile cells. Also required for ciliated ependymal cell differentiation.				done	chr1	+	Caudal_act,Homeodomain
25	ENSGALG00000008014	NM_205253.2	CEBPB		chr20	13703845	13928369	224524	Y	Y		TF	Transcription factors	Activator, DNA-binding, Repressor	Transcription, Transcription regulation	Transcription factor that binds specifically to the RAS-responsive elements (RRE) of gene promoters			GCM1, TEAD4	done	chr20	-	BZIP_2
26	ENSGALG00000013818	NM_206844.1	CITED2		chr3	53834369	54143128	308759	N			TR	Predicted intracellular protein	Chromatin regulator	Growth regulation, Transcription, Transcription regulation	Specifically recognizes and binds acylated histone H3, with a preference for histone H3 diacetylated at 'Lys-18' and 'Lys-27' (H3K18ac and H3K27ac) or histone H3 diacetylated at 'Lys-14' and 'Lys-27' (H3K14ac and H3K27ac)			p300, TFAP2	done	chr3	+	CITED
27	ENSGALG00000000678	NM_204718.2	CITED4	CITED3	chr23	1301474	1431320	129846	N			TR		Chromatin regulator, DNA-binding, Repressor	Cell cycle, Host-virus interaction, Transcription, Transcription regulation	The protein encoded by this gene was first identified by its ability to bind the adenovirus E1A protein. The protein localizes to the nucleus. It functions as a transcriptional repressor, and expression of E1A inhibits this repression.			TFAP2/AP-2	done	chr23	+	CITED
28	ENSGALG00000002301	NM_001277133.1	CNOT1	GNOT1	chr11	1447499	1545209	97710	N			TF	RAS pathway related proteins Transcription factors	DNA-binding	Transcription, Transcription regulation	Transcription factor activating transcription. Binds specifically the DNA GGAA/T core motif (Ets-binding site or EBS) in gene promoters and stimulates transcription.				done	chr11	-
29	ENSGALG00000026471	XM_422218.4	CRIP2		chr8	3998950	4026594	27644	N			TF	Transcription factors	Activator, Developmental protein, DNA-binding	Transcription, Transcription regulation					no homologous regions	chr8	-	LIM
30	ENSGALG00000003304	XM_003642883.2	CRTC1		chr28	3759818	3859632	99814	N			TR	Transcription factors	DNA-binding	Transcription, Transcription regulation	Zinc finger nuclear factor involved in transcription by regulating chromatin structure and organization 1, 2. Involved in the pluripotency and differentiation of embryonic stem cells by regulating SOX2, POU5F1/OCT4, and NANOG			CREB1	done	chr28	-	TORC_C,TORC_M,TORC_N
31	ENSGALG00000027905	XM_418530.4	CSRNP1		chr2	5271700	5290242	18542	Y	5'-AGAGTG-3		TF	Transcription factors	DNA-binding, Repressor	Transcription, Transcription regulation	The protein encoded by this gene is a zinc finger transcriptional repressor and may be part of the NuRD histone deacetylase complex (HDAC).				no homologous regions	chr2	+	CSRNP_N
32	ENSGALG00000000318	NM_205248.1	CSRP1		chr26	760885	773176	12291	N			TF	Transcription factors	Activator, DNA-binding	Transcription, Transcription regulation	MAFA is a transcription factor that binds RIPE3b, a conserved enhancer element that regulates pancreatic beta cell-specific expression of the insulin gene			zyxin/ZYX	done	chr26	+	LIM
33	ENSGALG00000029921	NM_205208.1	CSRP2		chr1	38205797	38309607	103810	N			TF	Transcription factors	Activator, Developmental protein, DNA-binding	Apoptosis, Differentiation, Neurogenesis, Transcription, Transcription regulation	Transcriptional activator which binds specifically to the MEF2 element, 5'-YTA[AT](4)TAR-3', found in numerous muscle-specific, growth factor- and stress-induced genes.				done	chr1	-	LIM
34	ENSGALG00000037015	ENSGALT00000027373.1	DACH1		chr1	156675576	157259244	583668	N			TF	Transcription factors	Activator, DNA-binding	Transcription, Transcription regulation	Transcriptional activator that binds to DNA sequences containing the consensus pentanucleotide 5'-CGGA[AT]-3'.			EYA3, SIX1	done	chr1	+	Ski_Sno
35	ENSGALG00000009129	NM_204159.1	DLX5		chr2	24124928	24483316	358388	Y	Y		TF	Transcription factors	Activator, Developmental protein, DNA-binding, Repressor	Apoptosis, Transcription, Transcription regulation					done	chr2	-	DLL_N,Homeodomain
36	ENSGALG00000041454	ENSGALT00000006362.1	DNMT3A		chr3	105028095	105079292	51197	N			TF	Predicted intracellular proteins, Transcription factors	Activator, DNA-binding	Transcription, Transcription regulation	Transcriptional activator that binds to the enhancer of the adenovirus E1A gene; the core-binding sequence is 5'[AC]GGA[AT]GT-3'.		DNA methylation		done	chr3	-	DNA_methylase,PWWP	targeted gene intron
37	ENSGALG00000041461	NM_001024828.1	DNMT3B		chr20	10437046	10477920	40874	N			TF	Predicted intracellular proteins, Transcription factors	DNA-binding		Binds to DNA sequences containing the consensus nucleotide core sequence 5'-GGAA.-3'.		DNA methylation		no homologous regions	chr20	+	DNA_methylase,PWWP
38	ENSGALG00000034648	FJ770467.1	E2F2	neighbour of ID3	chr23	2197331	2207165	9834	Y	Y		TF	Transcription factors	Developmental protein, DNA-binding, Repressor	Transcription, Transcription regulation		E2F			done	chr23		E2F_CC-MB,E2F_TDP
39	ENSGALG00000012680	XM_418915.4	E2F3		chr2	59601315	59669412	68097	Y	Y		TF	Transcription factors	DNA-binding	Transcription, Transcription regulation	Receptor-regulated SMAD (R-SMAD) that is an intracellular signal transducer and transcriptional modulator activated by TGF-beta (transforming growth factor) and activin type 1 receptor kinases. Binds the TRE element in the promoter region of many genes that are regulated by TGF-beta and, on formation of the SMAD2/SMAD4 complex, activates transcription.			DRGX, EOMES, FOXI1, FOXO6, ONECUT2, ONECUT2, TBX21	done	chr2	-	E2F_CC-MB,E2F_TDP
40	ENSGALG00000033678	NM_001012532.1	EHMT1		chr17	2436527	2669471	232944	N			TF	Transcription factors	Activator, Chromatin regulator, Developmental protein, DNA-binding	Transcription, Transcription regulation	Is thought to act as a 'pioneer' factor opening the compacted chromatin for other proteins through interactions with nucleosomal core histones and thereby replacing linker histones at target enhancer and/or promoter sites.		Histone methyltransferase		time out	chr17	+	Ank_2,Pre-SET,SET
41	ENSGALG00000016947	NM_001006269.1	ELF1		chr1	165695602	165863041	167439	Y	Y		TF	Transcription factors	Developmental protein, DNA-binding		Binds to 3 E-boxes of the E-cadherin/CDH1 gene promoter and to the promoters of CLDN7 and KRT8 and, in association with histone demethylase KDM1A which it recruits to the promoters, causes a decrease in dimethylated H3K4 levels and represses transcription			FOXJ2, FOXO1, MEIS1, GCM1, MYBL1, TEAD4, HOXB2, CEBPG	done	chr1	-	Elf-1_N,Ets
42	ENSGALG00000014930	XM_424790.4	ENC1		chrZ	24264357	24318227	53870	N			TF	Transcription factors	Activator, Developmental protein, DNA-binding	Transcription			Actin-binding protein		done	chrZ	+	BACK,BTB,Kelch_1
43	ENSGALG00000027247	XM_426003.4	EOMES		chr2	38724416	38802922	78506	Y	Y		TF	Transcription factors	Activator, DNA-binding	Transcription, Transcription regulation		TBR1 (T-box brain protein 1) sub-family of T-box genes			done	chr2	-	T-box, T-box_assoc
44	NM_001080874	ENSGALT00000025383.1	ERNI	ENS1, NM_001080874	chr5	53581643	53917902	336259	N			TF	Transcription factors	DNA-binding	Transcription, Transcription regulation	Possible transcriptional factor.				no human version	chr5	-
45	ENSGALG00000009645	NM_001007081.1	ESRRG		chr3	19726405	20575912	849507	Y	Y		TF	Transcription factors	Activator, DNA-binding	Differentiation, Neurogenesis, Transcription, Transcription regulation		ESRR family			seq too long	chr3	+
46	ENSGALG00000016059	NM_205312.1	ETS2		chr1	107764131	107928203	164072	Y	Y		TF	Transcription factors	DNA-binding, Repressor	Differentiation, Transcription, Transcription regulation					no homologous regions	chr1	+	Ets,SAM_PNT
47	ENSGALG00000035504	NM_204917.1	ETV1	ER81	chr2	27109261	27393798	284537	Y	Y		TF	Transcription factors	Activator, DNA-binding	Transcription, Transcription regulation					done	chr2	-	Ets,ETS_PEA3_N
48	ENSGALG00000036678	ENSGALT00000031379.1	ETV4	PEA3	chr27	3522513	3580610	58097	Y	Y		TF	Transcription factors	Developmental protein, DNA-binding	Transcription, Transcription regulation					done	chr27	+	Ets,ETS_PEA3_N
49	ENSGALG00000005768	ENSGALT00000009265.1	ETV5	ERM	chr9	5081189	5159953	78764	Y	Y		TF	Transcription factors	Activator, DNA-binding	Transcription, Transcription regulation					done	chr9	-	Ets,ETS_PEA3_N
50	ENSGALG00000004508	NM_204915.1	EYA2		chr20	5766692	5954421	187729	N			TF	Plasma proteins Transcription factors	DNA-binding, Repressor	Transcription, Transcription regulation				SIX1 (DNA-binding)	done	chr20	+
51	ENSGALG00000043399	ENSGALT00000020263.1	EZH2		chr2	54388557	54583411	194854	N			TF	Plasma proteins	DNA-binding	Transcription, Transcription regulation	Regulates MYC expression by binding to a single-stranded far-upstream element (FUSE) upstream of the MYC promoter. May act both as activator and repressor of transcription.	PcG	involved in histone methylation		done	chr2	-	EZH2_WD-Binding,SET	tageted down stream of the gene
52	ENSGALG00000007184	XM_414411.3	FEZF2		chr12	13054476	13265925	211449	Y			TR		Transferase	Ubl conjugation pathway	This protein forms homodimers which associate with microtubules in the cytoplasm. The protein is likely involved in the formation of multiprotein structures acting as anchor points to microtubules.	C2H2-type zinc finger	Transcription repressor		done	chr12	-	zf-C2H2
53	ENSGALG00000030889	NM_204770.1	FOXA2	HNF3B	chr3	3352447	3379196	26749	Y	Y		TF	Transcription factors	Activator, DNA-binding	Differentiation, Transcription, Transcription regulation					done	chr3	+	Forkhead,Forkhead_N,HNF_C
54	ENSGALG00000037457	ENSGALT00000037124.1	FOXI3	FOXI2?	chr4	86541669	86630421	88752	Y			TF	Transcription factors	Activator, DNA-binding	Transcription, Transcription regulation					done	chr4	-	Forkhead
55	ENSGALG00000007769	NM_001024827.1	FOXP1		chr12	15787733	16283718	495985	Y	Y		TF	Transcription factors	Activator, Developmental protein, DNA-binding	Transcription, Transcription regulation	The protein encoded by this gene is an embryonic nuclear transcription factor that binds to a specific DNA element, the palindromic T-site.				seq too long	chr12	-	Forkhead,FOXP-CC
56	ENSGALG00000008939	NM_001006535.1	FUBP1		chr8	18896968	19081080	184112	Y			TF	Transcription factors	Developmental protein, DNA-binding, Repressor	Transcription, Transcription regulation	This protein is a transcriptional repressor and is thought to play a role in the anterior/posterior axis of the tetrapod forelimb.				done	chr8	+	PF09005,KH_1
57	ENSGALG00000005909	NM_001003797.1	GATA2		chr12	9195467	9321510	126043	Y	Y		TF	Transcription factors	Developmental protein, DNA-binding	Differentiation, Neurogenesis, Transcription, Transcription regulation	Transcriptional regulator. Involved in the initiation of neuronal differentiation. Activates transcription by binding to the E box (5'-CANNTG-3').				done	chr12	+	GATA
58	ENSGALG00000029270	NM_001008444.1	GATA3		chr1	4399639	5027444	627805	Y	Y		TF	Transcription factors	Activator, DNA-binding, Repressor	Transcription, Transcription regulation, Wnt signaling pathway	The encoded protein forms a complex with beta-catenin and activates transcription through a Wnt/beta-catenin signaling pathway.				done	chr1	+	GATA
59	ENSGALG00000038200	XM_423773.4	GATAD2B		Un_NT_464188v1	(locate in unassembled region ingalGal5, locate in chr25 in galGal6)			N			TF	Transcription factors	Activator, DNA-binding	Phagocytosis, Transcription, Transcription regulation	This gene encodes a member of the GATA family of zinc-finger transcription factors that are named for the consensus nucleotide sequence they bind in the promoter regions of target genes.		Enhances MBD2-mediated repression	MBD2	no human version	Un_NT_464188v1		GATA,P66_CC
60	ENSGALG00000013342	NM_205068.1	GBX2		chr7	5183766	5389992	206226	Y	Y		TF	Transcription factors	Activator, DNA-binding, Repressor	Transcription, Transcription regulation, Wnt signaling pathway	Participates in the Wnt signaling pathway. Binds to DNA and acts as a repressor in the absence of CTNNB1, and as an activator in its presence.				done	chr7	+	Homeodomain
61	ENSGALG00000011630	NM_001098851.1	GLI2		chr7	25898531	26140360	241829	Y	Y		TF	Transcription factors	Activator, DNA-binding, Repressor	Transcription, Transcription regulation, Wnt signaling pathway	Participates in the Wnt signaling pathway and modulates MYC expression by binding to its promoter in a sequence-specific manner. Acts as repressor in the absence of CTNNB1, and as activator in its presence.				done	chr7	+	zf-C2H2
62	ENSGALG00000040266	NM_001271903.1	GLI3		chr2	50785035	51250006	464971	Y	Y		TF	Transcription factors	Activator, DNA-binding	Transcription, Transcription regulation	Together with the CITED2 coactivator, stimulates the PITX2 P1 promoter transcription activation. Associates with chromatin to the PITX2 P1 promoter region.				done	chr2	-
63	ENSGALG00000038495	XM_004935752.1	GRHL1		chr3	96817822	96931122	113300	Y	Y		TF	Transcription factors	Activator, DNA-binding	Transcription, Transcription regulation	The encoded protein can act as either a homodimer or heterodimer with other family members and is induced during retinoic acid-mediated differentiation. It plays a role in the development of the eyes, face, body wall, limbs, and neural tube.				time out	chr3	+	CP2
64	ENSGALG00000037687	XM_004939981.1	GRHL2		chr2	129375562	129684508	308946	Y	Y		TF	Transcription factors	DNA-binding						done	chr2	+	CP2
65	ENSGALG00000004249	XM_004947907.1	GRHL3		chr23	5691546	5777683	86137	Y	Y		TF	Transcription factors	DNA-binding, Repressor	Transcription, Transcription regulation					done	chr23	+	CP2
66	ENSGALG00000035104	ENSGALT00000046051.1	HAND1		chr13	12109041	12238760	129719	Y	Y (with TCF7L1(tcf3))		TF	Transcription factors	Activator, Developmental protein, DNA-binding	Differentiation, Neurogenesis, Transcription, Transcription regulation		helix-loop-helix family			done	chr13	+	HLH
67	ENSGALG00000007041	NM_001031120.3	HDX		chr4	8949844	9011502	61658	Y	Y		TF	Transcription factors	Activator, Developmental protein, DNA-binding, Repressor	Differentiation, Neurogenesis, Transcription, Transcription regulation					done	chr4	+	Homeodomain
68	ENSGALG00000028015	NM_001005848.1	HES1		chr9	12948202	13032559	84357	Y	Y		TF	Transcription factors	Activator, Developmental protein, DNA-binding	Differentiation, Neurogenesis, Transcription, Transcription regulation	This nuclear protein probably functions as a transcription factor in early stages of left-right body axis formation.	helix-loop-helix family			done	chr9	+	Hairy_orange,HLH
69	ENSGALG00000005506	NM_205012.1	HESX1		chr12	8595639	8689017	93378	Y	Y		TF	Transcription factors	Activator, Developmental protein, DNA-binding, Repressor	Differentiation, Neurogenesis, Transcription, Transcription regulation	It functions as a DNA-binding transcription factor by using distinct zinc fingers in different signaling pathways.				done	chr12	-	Homeodomain
70	ENSGALG00000035031	ENSGALT00000025381.1	HEY1	ENSG00000164683 (human)	chr2	121270127	121405948	135821	Y	Y		TF	Predicted intracellular protein	DNA-binding	Transcription, Transcription regulation	The STPR domain of the encoded protein binds to double stranded DNA and may also contain a nuclear localization signal, suggesting that this protein interacts with chromosomal DNA.				done	chr2	-	Hairy_orange
71	ENSGALG00000033416	XM_001232784.1	HIC2		chr15	200052	376029	175977	Y	Y		TF	Plasma proteins	Activator, Developmental protein, Repressor	Differentiation, Stress response, Transcription, Transcription regulation	Transcriptional coactivator of the p300/CBP-mediated transcription complex.				no homologous regions	chr15	+	BTB,zf-C2H2
72	ENSGALG00000011870	NM_204297.1	HIF1A		chr5	54022490	54087426	64936	Y	Y		TF	Predicted intracellular protein	Activator	Transcription, Transcription regulation	The protein encoded by this intronless gene belongs to the CITED family of transcriptional coactivators that bind to several proteins, including CREB-binding protein (CBP) and p300, via a conserved 32 aa C-terminal motif, and regulate gene transcription.				done	chr5	-	HIF-1,HIF-1a_CTAD,PAS,PAS_3
73	ENSGALG00000010005	NM_204807.1	HIF2A	EPAS1	chr3	26451151	26734870	283719	Y	5'-TACGTG-3'		TF	Predicted intracellular protein	Activator	Biological rhythms, Host-virus interaction, Transcription, Transcription regulation	Transcriptional coactivator for CREB1 which activates transcription through both consensus and variant cAMP response element (CRE) sites.			ARNT	done	chr3	+	HIF-1,HIF-1a_CTAD,PAS_3,PAS_9
74	ENSGALG00000012792	XM_003640420.2	HIPK2		chr1	56072834	56213027	140193	N			TR	Predicted intracellular protein			Adapter protein for the cul3 E3 ubiquitin-protein ligase complex (By similarity). Involved in late neuronal development and muscle formation (By similarity)		Serine/threonine-protein kinase	SMAD1, POU4F1	done	chr1	+	Pkinase
75	ENSGALG00000027365	XM_004947685.1	HIVEP3		chr23	617672	1078494	460822	Y	kappa-B motif		TF	Plasma proteins	Kinase, Serine/threonine-protein kinase, Transferase	Apoptosis, DNA damage, Transcription, Transcription regulation	This gene encodes a conserved serine/threonine kinase that is a member of the homeodomain-interacting protein kinase family. The encoded protein interacts with homeodomain transcription factors and many other transcription factors such as p53, and can function as both a corepressor and a coactivator depending on the transcription factor and its subcellular localization.	C2H2 zinc finger			no human version	chr23	+	zf-C2H2
76	ENSGALG00000030396	NM_204369.1	HMGA1		chr26	4382180	4432401	50221	Y	A+T rich regions in double-stranded DNA		TF	Transcription factors Basic leucine zipper factors (bZIP)	DNA-binding, Repressor	Transcription, Transcription regulation	This protein binds the cAMP response element (CRE) (consensus: 5'-GTGACGT[AC][AG]-3'), a sequence present in many viral and cellular promoters. Represses transcription from promoters with ATF sites. It may repress transcription by stabilizing the binding of inhibitory cofactors at the promoter.				done	chr26	-	AT_hook
77	ENSGALG00000009875	NM_205001.1	HMGA2	HMGI-C	chr1	34149236	34362549	213313	Y			TF	Basic leucine zipper factors (bZIP)::Basic leucine zipper factors (bZIP)	Helicase, Hydrolase	Transcription, Transcription regulation					done	chr1	+	AT_hook
78	ENSGALG00000028095	XM_003640697.2	HOXA1	ENSG00000105991 (human)	chr2	32547046	32682881	135835	Y	Y		TF	Transcription factors	Developmental protein, Repressor	Biological rhythms, Transcription, Transcription regulation	Transcriptional regulator (lacking a basic DNA binding domain) which negatively regulates the basic helix-loop-helix (bHLH) transcription factors by forming heterodimers and inhibiting their DNA binding and transcriptional activity.				done	chr2	-	Homeodomain
79	ENSGALG00000013454	NM_001080859.2	HOXB1		chr27	3817086	3922360	105274	Y	Y		TF	Transcription factors	Repressor	Biological rhythms, Myogenesis, Transcription, Transcription regulation	Transcriptional regulator (lacking a basic DNA binding domain) which negatively regulates the basic helix-loop-helix (bHLH) transcription factors by forming heterodimers and inhibiting their DNA binding and transcriptional activity.				done	chr27	-	Homeodomain
80	ENSGALG00000035016	ENSGALT00000036925.1	ID2		chr3	95980220	96277033	296813	N			TR	Predicted intracellular protein	Cyclin, Repressor	Cell cycle, Cell division, DNA damage, Transcription, Transcription regulation	This cyclin forms a complex with and functions as a regulatory subunit of CDK4 or CDK6, whose activity is required for cell cycle G1/S transition.				done	chr3		HLH
81	ENSGALG00000035317	NM_204589.1	ID3		chr23	2206384	2221187	14803	N			TR	Predicted intracellular protein		Apoptosis, Transcription, Transcription regulation	Participates in MYC-mediated cell transformation and apoptosis; induces anchorage-independent growth and clonogenicity in lymphoblastoid cells. Insufficient to induce tumorigenicity when overexpressed but contributes to MYC-mediated tumorigenesis. May play a role as transcriptional regulator.		inhibitor of DNA binding; form heterodimers with other HLH proteins	HLH proteins	done	chr23	-	HLH
82	ENSGALG00000006317	NM_001031312.1	ING5		chr9	4766596	4835011	68415	N			TF	Plasma proteins Transcription factors	Activator, DNA-binding	Immunity, Innate immunity, Transcription, Transcription regulation	Transcriptional activator which binds to the enhancer of the T-cell receptor alpha and delta genes.		histone H4-specific acetyltransferase activity		no homologous regions	chr9	-	ING
83	ENSGALG00000014297	NM_205372.1	IRF7		chr5	15832815	15898731	65916	Y	Y		TF	Predicted intracellular protein			Binds to the LIM domain of a wide variety of LIM domain-containing transcription factors.				done	chr5	+	IRF, IRF-3
84	ENSGALG00000005757	NM_205416.1	IRF8		chr11	17796100	17838014	41914	Y	Y		TF	Plasma proteins			This gene encodes a protein containing a calponin homology (CH) domain, a PDZ domain, and a LIM domain, and may be involved in protein-protein interactions.				done	chr11	-	IRF, IRF-3
85	ENSGALG00000030991	NM_001030338.1	IRX1		chr2	86908775	87413609	504834	Y			TF	Predicted intracellular protein	Activator	Notch signaling pathway, Transcription, Transcription regulation	Acts as a transcriptional coactivator for NOTCH proteins. Has been shown to amplify NOTCH-induced transcription of HES1. Potentiates activation by NOTCH3 and NOTCH4 more efficiently than MAML1 or MAML3.	Iroquois homeobox protein family			done	chr2	+	Homeobox_KN
86	ENSGALG00000013193	NM_001030336.1	IRX2		chr2	86437437	86911782	474345	Y	Y		TF		DNA-binding, Repressor	Transcription, Transcription regulation	Transcriptional corepressor which facilitates transcriptional repression via its association with DNA-binding transcription factors and recruitment of other corepressors and histone-modifying enzymes	Iroquois homeobox protein family			done	chr2	-	Homeobox_KN
87	ENSGALG00000045555	XM_004949880.1	IVNS1ABP	(neighbour SWT1)	chr8	10326595	10427614	101019	N			TF	Transcription factors	DNA-binding		May act as a transcription factor for cell pluripotency and differentiation in the embryo.		Inhibits pre-mRNA splicing		done	chr8	+	Kelch_1
88	ENSGALG00000011278	XM_426001.4	KAT2B	GCN5, GCN5L, P/CAF, PCAF;ENSG00000114166 (human)	chr2	35956760	36081052	124292	N			TF	Transcription factors	Activator, Developmental protein, DNA-binding, Repressor	Transcription, Transcription regulation	This gene encodes a protein which belongs to the C2H2-type zinc finger protein subclass of the Gli family. Members of this subclass are characterized as transcription factors which bind DNA through zinc finger motifs. These motifs contain conserved H-C links. Gli family zinc finger proteins are mediators of Sonic hedgehog (Shh) signaling				done	chr2	+	Acetyltransf_1,Bromodomain,PCAF_N
89	ENSGALG00000010074	XM_422410.2	KDM4A		chr8	20204414	20405728	201314	N			TF	Transcription factors	Activator, DNA-binding, Repressor	Transcription, Transcription regulation					done	chr8	+	JmjC
90	ENSGALG00000031560	NM_001277825.1	KIAA2018	USF3	chr1	79230740	79397529	166789	Y			TR	Predicted intracellular protein	Actin-binding	Transcription, Transcription regulation	The protein encoded by this gene interacts with the transcription factor myocardin, a key regulator of smooth muscle cell differentiation.				done	chr1	+	HLH
91	ENSGALG00000016927	XM_417013.4	KLF5		chr1	155841157	156325582	484425	Y	Y		TF	Predicted intracellular protein		Transcription, Transcription regulation	The protein encoded by this gene binds proteins of the TEA domain family of transcription factors (TEFs) through the Vg (vestigial) homology region found in its N-terminus.				done	chr1	-	zf-C2H2
92	ENSGALG00000033178	NM_001030969.1	KLF6		chr2	11518928	11809004	290076	Y	Y		TF	Predicted intracellular protein		Transcription, Transcription regulation	This gene encodes a protein with a transcriptional enhancer factor 1 (TEF-1) interaction domain. The encoded protein may act as a co-factor of TEF-1 regulated gene expression during skeletal muscle development.	Kruppel-like family			done	chr2		zf-C2H2
93	ENSGALG00000014485	NM_204829.1	LDB2		chr4	76539772	77187219	647447	N			TR	Predicted intracellular protein			This gene encodes a putative transcription factor with two LIM zinc-binding domains. The encoded protein may participate in the differentiation of smooth muscle tissue.	LIM-domain binding family	Binds to the LIM domain	LIM domain-containing transcription factors	done	chr4	+	LIM_bind
94	ENSGALG00000008303	XM_004934489.1	LHX5		chr15	12544616	12653968	109352	Y	Y		TF	Transcription factors	Developmental protein, DNA-binding, Repressor	Differentiation, Neurogenesis, Transcription, Transcription regulation					done	chr15	+	Homeodomain,LIM
95	ENSGALG00000036022	NM_001031774.2	LIN28A		chr23	161758	204061	42303	N			TF	Transcription factors	Activator, Developmental protein, DNA-binding	Transcription, Transcription regulation			RNA-binding protein		done	chr23	-	CSD,zf-CCHC
96	ENSGALG00000026761	NM_001034818.1	LIN28B		chr3	68876187	69185945	309758	N			TF	Transcription factors	Activator, DNA-binding	Transcription, Transcription regulation			Pre-miRNAs binding 5'-GGAG-3'		done	chr3	-	CSD,zf-CCHC
97	ENSGALG00000035679	XM_003641297.2	LMO1	LOC100858792	chr5	10096028	10203324	107296	Y			TF	Predicted intracellular protein	DNA-binding		this gene encodes a large protein that contains a helix-loop-helix domain and a polyglutamine region.				no homologous regions	chr5	+	LIM
98	ENSGALG00000016920	XM_004938645.1	LMO7		chr1	154522999	155045453	522454	N			TR	Plasma proteins			The LIM/double zinc-finger motif found in this gene product occurs in proteins with critical functions in gene regulation, cell growth, and somatic differentiation.				done	chr1	-	PF15949,LIM
99	ENSGALG00000040582	NM_205358.1	LMX1B		chr17	10539608	10728644	189036	Y	Y		TF		Activator, DNA-binding	Transcription, Transcription regulation		LIM-homeodomain family			done	chr17	+	Homeodomain,LIM
100	ENSGALG00000026264	NM_205025.1	MAFA		chr2	148642952	148904468	261516	Y	Y		TF		DNA-binding	Transcription, Transcription regulation					done	chr2		bZIP_Maf,Maf_N
101	ENSGALG00000017199	XM_003640590.2	MAML2		chr1	184962875	185282921	320046	N			TR	Predicted intracellular protein		Differentiation	CRP2 contains two copies of the cysteine-rich amino acid sequence motif (LIM) with putative zinc-binding activity, and may be involved in regulating ordered cell growth.	Mastermind-like family		NOTCH	done	chr1	+	MamL-1
102	ENSGALG00000001101	NM_001079751.1	MBD3		chr28	2450970	2472627	21657	N			TF	Transcription factors	DNA-binding	Transcription, Transcription regulation			transcriptional repressor; Recruits histone deacetylases and DNA methyltransferases		done	chr28		MBD_C,MBDa
103	ENSGALG00000016890	NM_001163376.1	MBNL2		chr1	145107028	145581918	474890	N			TF	Transcription factors	Activator, Developmental protein, DNA-binding	Transcription, Transcription regulation			RNA-binding protein that binds to 5'ACACCC-3' core sequence		done	chr1	-	Zf-CCCH
104	ENSGALG00000030377	XM_418042.4	MDFI		chr26	4878898	4924075	45177	N			TF	Transcription factors	DNA-binding, Repressor	Transcription, Transcription regulation			Regulates the transcriptional activity of TCF7L1/TCF3 by interacting directly with TCF7L1/TCF3 and preventing it from binding DNA	TCF7L1/TCF3	done	chr26	+	MDFI
105	ENSGALG00000037787	ENSGALT00000023483.1	MEF2D		chr25	1493615	1633419	139804	Y	Y		TF	Predicted intracellular protein	Activator, DNA-binding	Cell cycle, Cell division, Mitosis, Transcription, Transcription regulation					done	chr25		HJURP_C,SRF-TF
106	ENSGALG00000041626	NM_001139477.1	MEIS1		chr3	10478736	10854790	376054	Y	Y		TF	Transcription factors	DNA-binding, Repressor	Differentiation, DNA damage, DNA repair, Immunity, Innate immunity, Transcription, Transcription regulation					done	chr3	+	Homeobox_KN,Meis_PKNOX_N
107	ENSGALG00000039118	NM_204803.1	MEIS2		chr5	30910235	31416823	506588	Y	Y		TF	Transcription factors	DNA-binding, Repressor	Transcription, Transcription regulation	Transcriptional inhibitor that binds to DNA sequence 5'- CACCT-3' in different promoters. Represses transcription of E-cadherin.				done	chr5	+	Homeobox_KN,Meis_PKNOX_N
108	ENSGALG00000008653	XM_421144.4	MGA		chr5	24919671	25038481	118810	Y	Y		TF	Transcription factors	Activator, DNA-binding, Repressor	Myogenesis, Transcription, Transcription regulation	The encoded protein suppresses expression of the alpha-fetoprotein gene by binding to an AT-rich enhancer motif. The protein has also been shown to negatively regulate c-Myb, and transactivate the cell cycle inhibitor cyclin-dependent kinase inhibitor 1A (also known as p21CIP1).				done	chr5	+	T-box, HLH
109	ENSGALG00000038504	NM_204129.1	MID1		chr1	124577972	124820623	242651	N			TF	Transcription factors	Activator, DNA-binding	Transcription, Transcription regulation		tripartite motif (TRIM) family			done	chr1		fn3,PRY,SPRY,zf-B_box,zf-RING_UBOX
110	ENSGALG00000012024	XM_416243.4	MKL1	MRTFA	chr1	49980866	50116028	135162	N			TF		Developmental protein, DNA-binding, Repressor	Transcription, Transcription regulation				myocardin	done	chr1	+	RPEL,SAP
111	ENSGALG00000015078	XM_004949131.1	MLLT3		chrZ	33926267	34177168	250901	N			TF	Transcription factors	Activator, Developmental protein, DNA-binding	Transcription, Transcription regulation	Binds the DNA sequence 5'-NRTCTG-3' (non-canonical E-box) (By similarity		histone modification		done	chrZ	-	YEATS
112	ENSGALG00000004397	XM_415149.4	MLXIP		chr15	5772001	5856160	84159	Y	Y		TF	Transcription factors	DNA-binding	Transcription, Transcription regulation	Transcriptional regulator that binds to the promoter and activates the transcription of genes promoting brown adipose tissue (BAT) differentiation. Among brown adipose tissue-specific genes, binds the proximal region of the promoter of the UCP1 gene to activate its transcription and thereby regulate thermogenesis (By similarity).				done	chr15	+	HLH
113	ENSGALG00000015013	NM_205488.1	MSX1		chr4	79154871	79502933	348062	Y	Y		TR	Transcription factors	DNA-binding	Transcription, Transcription regulation	HMG-I/Y bind preferentially to the minor groove of A+T rich regions in double-stranded DNA. It is suggested that these proteins could function in nucleosome phasing and in the 3'-end processing of mRNA transcripts. They are also involved in the transcription regulation of genes containing, or in close proximity to A+T-rich regions.				done	chr4		Homeodomain
114	ENSGALG00000002803	NM_001012953.1	MTA1		chr8	3998787	4178115	179328	N			TF	Transcription factors	DNA-binding				chromatin remodeling		done	chr8	-	BAH,ELM2,GATA,MTA_R1,Myb_DNA-binding
115	ENSGALG00000013956	ENSGALT00000022624.1	MYB		chr3	55750601	56014966	264365	Y	Y		TR	Transcription factors	DNA-binding	Cell cycle, Cell division, DNA condensation, Growth regulation, Mitosis, Transcription, Transcription regulation	Functions as a transcriptional regulator. Functions in cell cycle regulation through CCNA2. Plays an important role in chromosome condensation during the meiotic G2/M transition of spermatocytes.				done	chr3	-	Cmyb_C,LMSTEN,Myb_DNA-binding
116	ENSGALG00000033631	NM_001030952.1	MYC	C-MYC	chr2	139841303	140251448	410145	Y	Y		TR		DNA-binding	Transcription, Transcription regulation	This protein binds to DNA methyltransferase 3 alpha (DNMT3A), and reduces DNMT3A-mediated CpG island methylation. It is suggested that silencing of this gene, resulting in acceleration of DNA methylation, may have a role in oncogenesis.				done	chr2	+	HLH,Myc-LZ,Myc_N
117	ENSGALG00000024047	XM_004947887.1	MYCL1	MYCL	chr23	5528891	5553385	24494					Predicted intracellular protein		Protein transport, Transport					done	chr23	-	HLH,Myc_N	targeted gene intron
118	ENSGALG00000016462	NM_001031091.1	MYCN	N-MYC	chr3	99660209	100102635	442426	Y	Y		TF	Predicted intracellular protein	Repressor	Transcription, Transcription regulation		MYC family			done	chr3	+	JAB,Myb_DNA-binding,SWIRM
119	ENSGALG00000010869	NM_001012927.1	MYSM1		chr8	26380775	26435648	54873	N			TF	Transcription factors	DNA-binding, Repressor	Transcription, Transcription regulation			histone modification		done	chr8		JAB,Myb_DNA-binding,SWIRM
120	ENSGALG00000037778	NM_204268.2	NAB1		chr7	42406	155831	113425	N			TF	Transcription factors	Activator, DNA-binding	Transcription, Transcription regulation					done	chr7	-	Nab1,NCD1,NCD2
121	ENSGALG00000027772	NM_001146142.1	NANOG		chr1	75873706	75978248	104542	Y	Y		TF	Predicted intracellular protein	Repressor	Transcription, Transcription regulation				SMAD1	no homologous regions	chr1	-	Homeodomain
122	ENSGALG00000036017	XM_001231577.3	NCOA2	ENSG00000140396 (human)	chr2	116848790	117174390	325600	N			TF	Transcription factors	Activator, DNA-binding	Transcription, Transcription regulation	The encoded protein forms a heterodimer with the related transcription factor MAX. This complex binds to the E box DNA consensus sequence and regulates the transcription of specific target genes.		Coactivator of the steroid binding domain (AF-2)		done	chr2	-	PAS
123	ENSGALG00000005653	NM_204413.1	NFKB2		chr6	16890004	16980532	90528	Y	Y		TF	Predicted intracellular protein	Activator, Repressor	Host-virus interaction, Transcription, Transcription regulation	ATF7IP is a multifunctional nuclear protein that associates with heterochromatin. It can act as a transcriptional coactivator or corepressor depending upon its binding partners				done	chr6	+	Ank_2,RHD_dimer,RHD_DNA_bind
124	ENSGALG00000010500	NM_001199548.1	NKX6-2		chr6	35228494	35316388	87894	Y	Y		TR	Predicted intracellular protein		Transcription, Transcription regulation	Component of the ACF complex, an ATP-dependent chromatin remodeling complex, that regulates spacing of nucleosomes using ATP to generate evenly spaced nucleosomes along the chromatin				done	chr6	-	Homeodomain
125	ENSGALG00000008519	XM_004944728.1	NR2C2		chr12	19724157	19835627	111470	Y	Y		TR	Plasma proteins Transcription factors	Repressor	Transcription, Transcription regulation	Transcription factor associated with the BAF SWI/SNF chromatin remodeling complex (By similarity).				done	chr12	-	Hormone_recep,zf-C4
126	ENSGALG00000015681	XM_004938351.1	NRIP1		chr1	98249016	98352796	103780	N			TF	Transcription factors	Activator, DNA-binding	Transcription, Transcription regulation					done	chr1	-	NRIP1_repr_1,NRIP1_repr_2,NRIP1_repr_3,NRIP1_repr_4
127	ENSGALG00000002971	ENSGALT00000004699.1	NSD1		chr13	10188384	10349055	160671	N			TF	Transcription factors	Developmental protein, DNA-binding	Transcription, Transcription regulation			Histone methyltransferase		done	chr13	-	PWWP,C5HCH,SET,AWS	targeted gene intron
128	ENSGALG00000034889	NM_204520.2	OTX2		chr5	55747636	56006409	258773	Y	Y		TR	Predicted intracellular protein	Chromatin regulator, Repressor	Transcription, Transcription regulation	Component of a Polycomb group (PcG) multiprotein PRC1-like complex, a complex class required to maintain the transcriptionally repressive state of many genes, including Hox genes, throughout development. PcG PRC1 complex acts via chromatin remodeling and modification of histones				done	chr5	+	Homeodomain,TF_Otx
129	ENSGALG00000012123	NM_205066.1	PAX6		chr5	5112917	5288227	175310	Y	Y		TR	Predicted intracellular protein	Chromatin regulator	Growth regulation, Transcription, Transcription regulation					done	chr5	-	Homeodomain
130	ENSGALG00000034076	XM_004950821.1	PBX4		(locate in unassembled region)				Y			TR	Predicted intracellular protein	Repressor	Transcription, Transcription regulation	Acts as a transcriptional repressor for zinc finger transcription factors EGR1 and EGR2.							Homeodomain,PBC
131	ENSGALG00000008700	ENSGALT00000014159.1	PDCD4		chr6	26100945	26185218	84273	N			TF	Transcription factors	Activator, Developmental protein, DNA-binding, Repressor	Transcription, Transcription regulation	The protein encoded by this gene is a DNA binding homeobox transcription factor involved in embryonic stem (ES) cell proliferation, renewal, and pluripotency.				done	chr6	+	MA3
132	ENSGALG00000005422	XM_004942093.1	PDLIM1		chr6	16438358	16497216	58858	N			TF		Activator, DNA-binding, Repressor	Biological rhythms, Transcription, Transcription regulation	The protein encoded by this gene can function as both a transcriptional activator or repressor depending on its dimerization partner				done	chr6	+	PF15936,LIM,PDZ
133	ENSGALG00000039872	NM_204839.1	PDLIM4		chr13	16858139	16910361	52222	N			TF	Transcription factors	Developmental protein, DNA-binding, Repressor						done	chr13		PF15936,LIM,PDZ
134	ENSGALG00000012211	ENSGALT00000037662.1	PDLIM5		chr4	58558652	59187475	628823	N			TR	Predicted intracellular protein	Repressor	Biological rhythms, Transcription, Transcription regulation	The protein encoded by this gene is a transcriptional regulatory protein. It contains paired amphipathic helix (PAH) domains, which are important for protein-protein interactions and may mediate repression by the Mad-Max complex.				time out	chr4		PF15936,LIM,PDZ
135	ENSGALG00000006424	XM_004944998.1	PHF15	JADE2	chr13	15844450	15903339	58889	N			TR	Transcription factors	Activator, DNA-binding	Apoptosis, Transcription, Transcription regulation	The protein encoded by this gene contains an HMG-box, indicating that it may be involved in bending and unwinding of DNA and alteration of chromatin structure. Transcriptional coactivator of the p300/CBP-mediated transcription complex.				done	chr13	-	zf-HC5HC2H_2,zf-HC5HC2H,PHD_2,PHD,EPL1
136	ENSGALG00000001845	XM_418005.4	PHTF1		chr26	3711984	3842369	130385	Y			TR		Activator	Biological rhythms, Transcription, Transcription regulation	The protein encoded by this gene functions as a transcriptional coactivator for nuclear hormone receptors, including steroid, thyroid, retinoid, and vitamin D receptors.				done	chr26	-	Phtf-FEM1B_bdg
137	ENSGALG00000042492	NM_205010.1	PITX2		chr4	58161840	58190904	29064	Y	Y		TF	Predicted intracellular protein	Repressor	Transcription, Transcription regulation	The translocation produces a chimeric gene made up of the 5'-region of the RUNX1 (AML1) gene fused to the 3'-region of the CBFA2T1 (MTG8) gene. The chimeric protein is thought to associate with the nuclear corepressor/histone deacetylase complex to block hematopoietic differentiation.				done	chr4	+	Homeodomain,OAR
138	ENSGALG00000042851	NM_001006457.1	PPARGC1A		chr4	74288912	74760610	471698	N			TF	Transcription factors	Activator, DNA-binding, Receptor, Repressor	Differentiation, Spermatogenesis, Transcription, Transcription regulation			Transcriptional coactivator for steroid receptors and nuclear receptors		no human version	chr4	+	RRM_1
139	ENSGALG00000033439	ENSGALT00000036696.1	PRDM14		chr2	116879813	116931717	51904	Y	5'-GGTC[TC]CTAA-3'		TR	Predicted intracellular protein			Component of heterochromatin. Recognizes and binds histone H3 tails methylated at 'Lys-9', leading to epigenetic repression. Interaction with lamin B receptor (LBR) can contribute to the association of the heterochromatin with the inner nuclear membrane.				done	chr2	-	zf-C2H2,zf-C2H2_4
140	ENSGALG00000001506	NM_001277741.1	PTTG1	PTTG2	chr13	7812233	7880886	68653	N			TF	Transcription factors	Developmental protein, DNA-binding, Repressor	Notch signaling pathway, Transcription, Transcription regulation			chromosome stability		done	chr13	-	Securin
141	ENSGALG00000044251	XM_004941476.1	RASSF7		chr5	15883437	15934947	51510	N			TR	Predicted intracellular protein	DNA-binding, Repressor, Transferase	Transcription, Transcription regulation, Ubl conjugation pathway	The protein encoded by this gene mediates transcriptional control by interaction with the activation function 2 (AF2) region of several nuclear receptors, including the estrogen, retinoic acid, and vitamin D3 receptors.				done	chr5	-	RA
142	ENSGALG00000001773	XM_418212.2	RFX2		chr28	1492328	1632235	139907	Y	Y		TR	Predicted intracellular protein	Chromatin regulator, DNA-binding, Repressor	Differentiation, Sexual differentiation, Transcription, Transcription regulation	This gene encodes a component of the polycomb multiprotein complex, which is required to maintain the transcriptionally repressive state of many genes throughout development via chromatin remodeling and modification of histones.				done	chr28	-	RFX1_trans_act,RFX_DNA_binding	targeted down stream of the gene
143	ENSGALG00000010179	XM_003642990.2	RFX3		chrZ	26656844	27127823	470979	Y	Y		TR	Predicted intracellular protein		Cilium biogenesis/degradation, Differentiation	The protein encoded by this gene interacts directly with the C-terminal region of beta-catenin, inhibiting oncogenic beta-catenin-mediated transcriptional activation by competing with transcription factors for binding to beta-catenin.				done	chrZ	-	RFX1_trans_act,RFX_DNA_binding
144	ENSGALG00000043085	NM_001030623.2	RNF14		chr13	17254417	17283285	28868	N			TR	Predicted intracellular protein			Zinc-finger proteins bind nucleic acids and play important roles in various cellular functions, including cell proliferation, differentiation, and apoptosis. This gene encodes a LIM-domain zinc finger protein. The LIM domain is composed of two contiguous zinc finger domains, separated by a two-amino acid residue hydrophobic linker. The LIM domain mediates protein:protein interactions.				done	chr13	+	IBR,RWD
145	ENSGALG00000012799	NM_205049.1	RREB1		chr2	64811035	65014514	203479	Y	Y		TR	Predicted intracellular protein	Developmental protein, Repressor	RNA-mediated gene silencing, Transcription, Transcription regulation, Translation regulation					done	chr2	-	zf-C2H2
146	ENSGALG00000033091	NM_204744.1	RUNX1T1		chr2	125506808	126274514	767706	N			TR		Actin-binding, Developmental protein		The encoded protein plays a role in the oxidative stress response as a regulator of the transcription factor Nrf2, and expression of this gene may play a role in malignant transformation.		Transcriptional corepressor		done	chr2	-	NHR2,TAFH,zf-MYND
147	ENSGALG00000039238	NM_204707.1	SALL1		chr11	5642428	6273108	630680	Y	Y (from literatures)		TF	Predicted intracellular protein	Activator, Developmental protein, DNA-binding, Repressor	Transcription, Transcription regulation	This gene encodes a chromatin-associated protein that associates with other DNA-binding transcription factors to regulate gene expression and cell fate determination during development.		may be part of the NuRD histone deacetylase complex (HDAC)		done	chr11	+	zf-C2H2
148	ENSGALG00000041404	NM_204647.1	SALL3		chr2	56990279	57129079	138800	Y			TF	Basic helix-loop-helix factors (bHLH)	DNA-binding, Repressor	Biological rhythms, Transcription, Transcription regulation	The encoded protein can interact with ARNTL or compete for E-box binding sites in the promoter of PER1 and repress CLOCK/ARNTL's transactivation of PER1. This gene is believed to be involved in the control of circadian rhythm and cell differentiation.			DNMT3A	no human version	chr2	-	zf-C2H2,zf-C2H_4,zf-met
149	ENSGALG00000041790	XM_004936485.1	SAMD4A		chr5	56454248	56566185	111937	N			TR	Transcription factors	Activator, Developmental protein, DNA-binding, Repressor	Differentiation, Transcription, Transcription regulation	Associates with SMADs in response to BMP2 leading to activate transcription of BMP target genes. Acts as a transcriptional repressor via its interaction with EBF1, a transcription factor involved specification of B-cell lineage; this interaction preventing EBF1 to bind DNA and activate target genes.		RNA binding		done	chr5	-	SAM_1	targed down stream of the gene
150	ENSGALG00000016537	XM_004934693.1	SCML2		chr1	120680963	120971501	290538	N			TF	Transcription factors	DNA-binding, Repressor	Transcription, Transcription regulation		PcG	binds histone peptides		done	chr1	+	MBT,RBR,SAM_1,SLED
151	ENSGALG00000004324	NM_001030661.1	SETD1B		chr15	5617555	5741938	124383	N			TF	Transcription factors	Activator, DNA-binding	Transcription, Transcription regulation			a component of a histone methyltransferase complex		done	chr15	+	N-SET,RRM_1,SET
152	ENSGALG00000042051	ENSGALT00000008839.1	SETD2		chr2	3844199	3975345	131146	N			TF	Transcription factors	Activator, DNA-binding	Angiogenesis, Differentiation, Transcription, Transcription regulation	Transcription factor involved in the induction of oxygen regulated genes. Heterodimerizes with ARNT; heterodimer binds to core DNA sequence 5'-TACGTG-3' within the hypoxia response element (HRE) of target gene promoters (By similarity).		histone methyltransferase		done	chr2	-	SET,SRI,WW
153	ENSGALG00000001644	XM_004943705.1	SIN3A		chr10	2543440	2625205	81765	N			TR	Transcription factors		Transcription, Transcription regulation	Functions as a transcriptional repressor for PRDM1.			MXI1	done	chr10	-	PAH,Sin3_corepress,Sin3a_C
154	ENSGALG00000029401	NM_001044685.1	SIX1		chr5	54329975	54497598	167623	Y	Y		TR	Enzymes Plasma proteins Potential drug targets Transcription factors	Chromatin regulator, DNA-binding, Methyltransferase, Repressor, Transferase		This gene encodes a DNA methyltransferase that is thought to function in de novo methylation, rather than maintenance methylation.				done	chr5	+	Homeodomain,SIX1_SD
155	ENSGALG00000032259	NM_204364.1	SIX3		chr3	25638018	25943471	305453	Y	Y		TR	Enzymes Potential drug targets Transcription factors	Activator, DNA-binding, Methyltransferase, Repressor, Transferase		This gene encodes a DNA methyltransferase which is thought to function in de novo methylation, rather than maintenance methylation.				done	chr3	+	Homeodomain,SIX1_SD
156	ENSGALG00000036001	NM_204561.1	SMAD2		chrZ	1378012	1742828	364816	Y	Y (with smad3)		TR	Predicted intracellular protein	Chromatin regulator, Methyltransferase, Transferase						done	chrZ	+	MH2,MH1
157	ENSGALG00000010164	NM_205139.1	SMARCA2		chrZ	26231336	26561533	330197	N			TF	Transcription factors	Transcription, Transcription regulation	Transcription, Transcription regulation	Kappa-B motif is a gene regulatory element found in promoters and enhancers of genes involved in immunity, inflammation, and growth and that responds to viral antigens, mitogens, and cytokines.	SWI/SNF family	chromatin remodeling		done	chrZ	+	BRK,Bromodomain,Helicase_C,HSA,QLQ,SnAC,SNF2_N
158	ENSGALG00000029247	XM_003643118.2	SMARCD1		chr33	292415	308584	16169	N			TF	Transcription factors	Developmental protein, DNA-binding	Transcription, Transcription regulation		SWI/SNF family	chromatin remodeling		done	chr33	-	SWIB
159	ENSGALG00000008018	NM_205142.1	SNAI1		chr20	13971704	14013419	41715	Y	Y		TR								done	chr20	-	zf-C2H2
160	ENSGALG00000030353	NM_204333.1	SOX1		chr1	139810712	139974044	163332	Y	Y		TR	Plasma proteins	Activator, Chromatin regulator, Developmental protein, Hydrolase, Protein phosphatase	DNA damage, DNA repair, Transcription, Transcription regulation	Functions both as protein phosphatase and as transcriptional coactivator for SIX1, and probably also for SIX2, SIX4 and SIX5	SOX			done	chr1	+	HMG_box,SOXp
161	ENSGALG00000016397	NM_205187.1	SOX11		chr3	94732000	95375463	643463	Y	Y		TR	Plasma proteins	Chromatin regulator, Methyltransferase, Repressor, Transferase	Biological rhythms, Transcription, Transcription regulation		SOX			done	chr3		HMG_box
162	ENSGALG00000000583	XM_003642722.2	SOX13		chr26	1580281	1803625	223344	Y	Y		TR	Plasma proteins Transcription factors	Repressor	Transcription, Transcription regulation	The encoded protein is part of the methyl-CpG-binding protein-1 complex, which represses gene expression by deacetylating methylated nucleosomes.	SOX			done	chr26	+	HMG_box	targeted upstream of the gene
163	ENSGALG00000043460	NM_205188.1	SOX2		chr9	16558800	16924262	365462	Y	Y		TR		Activator, Chromatin regulator	Transcription, Transcription regulation		SOX			done	chr9	-	HMG_box,SOXp
164	ENSGALG00000040383	NM_204195.1	SOX3		chr4	10509451	10603605	94154	Y	Y		TR	Predicted intracellular protein		Host-virus interaction	Involved in many cell functions, including pre-mRNA splicing, the aryl hydrocarbon receptor (AHR) pathway, F-actin organization and protein ubiquitination.	SOX			done	chr4	+	HMG_box,SOXp
165	ENSGALG00000036497	NM_204484.1	SOX4		chr2	58820170	59101828	281658	Y	Y		TR	histone acetyltransferase	Activator, Acyltransferase, Transferase	Biological rhythms, Cell cycle, Host-virus interaction, Transcription, Transcription regulation	Functions as a histone acetyltransferase (HAT) to promote transcriptional activation	SOX			done	chr2	-	HMG_box
166	ENSGALG00000004386	NM_204281.1	SOX9		chr18	8865559	8965806	100247	Y	Y		TR	histone demethylase	Chromatin regulator, Dioxygenase, Oxidoreductase	Host-virus interaction, Transcription, Transcription regulation		SOX			done	chr18	+	HMG_box,Sox_N
167	ENSGALG00000039454	ENSGALT00000017736.1	SP4		chr2	30452798	30589327	136529	Y	Y		TR	Predicted intracellular protein	RNA-binding	RNA-mediated gene silencing					done	chr2	+	zf-C2H2
168	ENSGALG00000031024	XM_003641470.2	STOX1		chr6	10741351	10855846	114495	Y			TR		Activator	Biological rhythms, Transcription, Transcription regulation	Modulates transcriptional activation by steroid receptors such as NR3C1, NR3C2 and ESR1. Also modulates transcriptional repression by nuclear hormone receptors. Positive regulator of the circadian clock gene expression: stimulates transcription of ARNTL/BMAL1, CLOCK and CRY1 by acting as a coactivator for RORA and RORC. Involved in the regulation of ovarian function (By similarity). Plays a role …				no result	chr6	-	Stock_head	partially targeted at gene intron
169	ENSGALG00000010646	ENSGALT00000017319.1	STOX2		chr4	39884458	39974443	89985					Predicted intracellular protein	Transferase	Ubl conjugation pathway					done	chr4	-	Stock_head
170	ENSGALG00000011489	NM_204940.1	T	Brachyury, TBXT, BRAC	chr3	42962041	43088554	126513	Y	Y		TR	Predicted intracellular protein	RNA-binding	RNA-mediated gene silencing					no result ?	chr3	+	T-box
171	ENSGALG00000006688	XM_414389.4	TADA3		chr12	11502008	11562923	60915	N			TF	Transcription factors	Developmental protein, DNA-binding	Transcription, Transcription regulation	Sequence-specific transcription factor which is part of a developmental regulatory system that provides cells with specific positional identities on the anterior-posterior axis. Acts on the anterior body structures.				done	chr12	-	Ada3
172	ENSGALG00000039182	NM_001031369.1	TBL1XR1		chr9	17784063	18100721	316658	N			TF	Transcription factors	Activator, DNA-binding	Antiviral defense, Host-virus interaction, Immunity, Innate immunity, Transcription, Transcription regulation					done	chr9	+	LisH,WD40
173	ENSGALG00000036043	ENSGALT00000010560.1	TBX3		chr15	12011598	12293067	281469	Y	Y		TR	Predicted intracellular protein	DNA-binding	Transcription, Transcription regulation	Acts as transcriptional repressor and plays a role in gene silencing. Does not bind to DNA by itself 1. Binds to DNA with a preference for sites containing methylated CpG dinucleotides (in vitro). Binds to a lesser degree DNA containing unmethylated CpG dinucleotides 2. Recruits histone deacetylases and DNA methyltransferases.				done	chr15	+	T-box,TBX
174	ENSGALG00000004304	NM_205375.2	TCF12		chr10	7173125	7518923	345798	Y	Y		TR	Predicted intracellular protein	Activator, DNA-binding	Transcription, Transcription regulation	Specifically recognizes and binds acylated histone H3, with a preference for histone H3 that is crotonylated				done	chr10	-
175	ENSGALG00000006480	NM_204547.1	TCF7	TCF1;HNF1A	chr13	15995810	16086950	91140	Y	Y		TR	Transcription factors	Activator, DNA-binding, Repressor	Biological rhythms, Transcription, Transcription regulation	Transcriptional coregulator which can act as both a transcriptional corepressor and coactivator. As a part of the histone-deacetylase multiprotein complex (NuRD), regulates transcription of its targets by modifying the acetylation status of the target chromatin and cofactor accessibility to the target DNA.				done	chr13	-	CTNNB1_binding,HMG_box
176	ENSGALG00000001093	XM_003643906.2	TCF7L1	TCF3	chr28	2371252	2454544	83292	Y	Y		TR	Predicted intracellular protein	Activator, Chromatin regulator, DNA-binding, Hydrolase, Metalloprotease, Protease	Transcription, Transcription regulation, Ubl conjugation pathway					done	chr28	+	PF0CTNNB1_binding8347,HMG_box
177	ENSGALG00000008883	NM_001206510.2	TCF7L2	TCF4	chr6	26989025	27357023	367998	Y	Y		TR	Plasma proteins	Activator, Chromatin regulator, Methyltransferase, Repressor, Transferase	Transcription, Transcription regulation					done	chr6	+	CTNNB1_binding,HMG_box
178	ENSGALG00000012775	NM_205094.1	TFAP2A		chr2	63486549	64026667	540118	Y	Y		TR			Cell cycle, Cell division, Chromosome partition, DNA damage, DNA repair, Mitosis	Regulatory protein, which plays a central role in chromosome stability, in the p53/TP53 pathway, and DNA repair.				done	chr2	+	TF_AP-2
179	ENSGALG00000007690	XM_003642494.2	TFAP2C		chr20	12010974	12173895	162921	Y	Y		TR	Plasma proteins	Repressor	Translation regulation	This gene encodes a member of the Polycomb group proteins. These proteins form the Polycomb repressive complexes which are involved in transcriptional repression. The encoded protein binds histone peptides that are monomethylated at lysine residues and may be involved in regulating homeotic gene expression during development				done	chr20	-	TF_AP-2
180	ENSGALG00000011635	XM_422087.4	TFCP2L1	CRTR1	chr7	26155161	26353230	198069	Y	? Check TFCP2		TR	Predicted intracellular protein	Activator, Chromatin regulator, Methyltransferase, RNA-binding, Transferase	Transcription, Transcription regulation	SET1B is a component of a histone methyltransferase complex that produces trimethylated histone H3 at Lys4 (Lee et al., 2007)				done	chr7	-	CP2	targeted down stream of the gene
181	ENSGALG00000014795	NM_205379.1	TGIF1		chr2	100992700	101132275	139575	Y	Y		TR	Predicted intracellular protein	Activator, Chromatin regulator, Developmental protein, Methyltransferase, Transferase		This protein is a histone methyltransferase that is specific for lysine-36 of histone H3, and methylation of this residue is associated with active chromatin. This protein also contains a novel transcriptional activation domain and has been found associated with hyperphosphorylated RNA polymerase II.				done	chr2		Homeobox_KN
182	ENSGALG00000003106	XM_004946975.1	TOX2		chr20	2359088	2664270	305182					Predicted intracellular protein							done	chr20	-	HMG_box
183	ENSGALG00000034649	ENSGALT00000005929.1	TOX3		chr11	5199901	5621401	421500	N			TR	Predicted intracellular protein			The encoded protein is a component of histone deacetylase-containing multiprotein complexes that function through modifying chromatin structure to keep genes silent.				done	chr11	+	HMG_box
184	ENSGALG00000012823	ENSGALT00000020916.1	TRIM24		chr1	56393017	56590270	197253	N			TR	Transcription factors	DNA-binding	Transcription, Transcription regulation	Low-percent homology to certain collagens suggests that it may function as a transcription factor or extra-nuclear regulator factor for the synthesis or organization of collagen fibers				no result	chr1	-	Bromodomain,PHD,zf-B_box
185	ENSGALG00000034004	XM_422922.4	TRIM3		chr1	194383018	194444262	61244	N				Predicted intracellular protein							done	chr1	+	Filamin,PF01436,zf-B_box,zf-RING_UBOX
186	ENSGALG00000012367	XM_421468.4	TRIM9		chr9	58105984	58156113	50129	N				Predicted intracellular protein							done	chr9	-	Fn3,SPRY,zf-B_box,zf-RING_UBOX	targeted down stream of the gene
187	ENSGALG00000006412	XM_004940683.1	VGLL1		chr4	4334898	4448994	114096	N			TR	Predicted intracellular protein	RNA-binding	mRNA processing, mRNA splicing	Mediates pre-mRNA alternative splicing regulation. Acts either as activator or repressor of splicing on specific pre-mRNA targets.				done	chr4	+	Vg_Tdu	targed down stream of the gene
188	ENSGALG00000014917	NM_001145990.1	VGLL2		chr3	63088876	63245860	156984	N			TR	Predicted intracellular protein	Developmental protein	Differentiation	This protein is a transcription factor that negatively regulates other myogenic family proteins. Studies of the mouse homolog, I-mf, show that it interferes with myogenic factor function by masking nuclear localization signals and preventing DNA binding.				done	chr3	+	Vg_Tdu
189	ENSGALG00000015705	ENSGALT00000025327.1	WHSC1	NSD2	chr4	83676522	83933888	257366	N			TF	Transcription factors	Activator, DNA-binding, Repressor	Autophagy, Transcription, Transcription regulation					done	chr4	-	PWWP,SET,C5HCH,AWS,HMG_box
190	ENSGALG00000029135	ENSGALT00000016197.1	YEATS4	GAS41	chr1	35429300	35586549	157249	N			TF	Transcription factors	DNA-binding		This gene encodes a member of the Iroquois homeobox protein family. Homeobox genes in this family are involved in pattern formation in the embryo				done	chr1	+	YEATS
191	ENSGALG00000011718	XM_001234834.1	ZBTB1		chr5	52911526	53037870	126344	Y			TR		RNA-binding	Apoptosis					seq too long	chr5	-	BTB
192	ENSGALG00000006062	XM_004947124.1	ZBTB46		chr20	9694251	9833959	139708					Transcription factors	DNA-binding						done	chr20	+	BTB,zf-C2H2
193	ENSGALG00000040465	ENSGALT00000020339.1	ZEB2	SIP1;ZFHX1B	chr7	32895724	33590372	694648	Y	5'-CACCT-3'		TR	Plasma proteins			This gene encodes a member of the enigma protein family. The protein contains two protein interacting domains, a PDZ domain at the amino terminal end and one to three LIM domains at the carboxyl terminal. It is a cytoplasmic protein associated with the cytoskeleton. The protein may function as an adapter to bring other LIM-interacting proteins to the cytoskeleton.	Zfh1 family of 2-handed zinc finger/homeodomain proteins			done	chr7	-	zf-C2H2,zf-Di19
194	ENSGALG00000000713	XM_414230.4	ZFHX3		chr11	19419627	19879012	459385	Y	AT-rich core sequence		TR				Inactivated SRC dissociates from this protein allowing the initiation of a new SRC inactivation cycle 1. Involved in reorganization of the actin cytoskeleton 2. In nonmuscle cells, binds to ACTN1 (alpha-actinin-1), increases the affinity of ACTN1 to F-actin (filamentous actin), and promotes formation of actin stress fibers.				done	chr11	+	Homeodomain,zf-C2H2
195	ENSGALG00000043827	ENSGALT00000026439.1	ZHX2		chr2	137889386	138017230	127844					Predicted intracellular protein							done	chr2	+	Homeodomain
196	ENSGALG00000040532	NM_204254.1	ZIC1		chr9	11839851	12037661	197810	Y	Y		TR	Predicted intracellular protein	Activator, DNA-binding, Helicase, Hydrolase	Neurogenesis, Transcription, Transcription regulation	The encoded protein is part of the large ATP-dependent chromatin remodeling complex SNF/SWI, which is required for transcriptional activation of genes normally repressed by chromatin.	ZIC family			done	chr9		zf-C2H2
197	ENSGALG00000041083	XR_026941.1	ZIC2		chr1	144168431	144447113	278682	Y	Y		TR	Predicted intracellular protein	Chromatin regulator	Neurogenesis	The encoded protein is part of the large ATP-dependent chromatin remodeling complex SNF/SWI and has sequence similarity to the yeast Swp73 protein.				done	chr1	-	zf-C2H2
198	ENSGALG00000031144	ENSGALT00000010497.1	ZIC3		chr4	4568935	4633709	64774	Y	Y		TR	Predicted intracellular protein		Transcription, Transcription regulation	The protein encoded by this gene is a transcriptional activator adaptor and a component of the histone acetyl transferase (HAT) coactivator complex which plays a crucial role in chromatin modulation and cell cycle progression.				done	chr4	+	zf-C2H2
199	ENSGALG00000005533	XM_004940633.1	ZMYM3		chr4	2271507	2334315	62808					Transcription factors	DNA-binding	Transcription, Transcription regulation	Putative transcriptional activator involved in the hypothalamo-pituitary-gonadal system.				done	chr4	+	PF12012,zf-FCS
200	ENSGALG00000006599	XM_004939164.1	ZMYND11		chr2	9843961	10072674	228713	N			TF	Transcription factors	DNA-binding						done	chr2	+	Bromodomain,PWWP
201	ENSGALG00000014859	XM_429143.4	ZNF131		chrZ	13426946	13745715	318769					Transcription factors	DNA-binding, Repressor	Differentiation, Neurogenesis, Transcription, Transcription regulation					done	chrZ	+	BTB
202	ENSGALG00000040362	ENSGALT00000012104.1	ZNF185	(lincRNA)	chr4	11227940	11341663	113723	N				Predicted intracellular protein							no result	chr4	-
203	ENSGALG00000009454	NM_001195469.1	ZNF277		chr1	26896793	27529655	632862					Transcription factors	DNA-binding, Repressor	Transcription, Transcription regulation					seq too long	chr1	-
204	ENSGALG00000012629	XM_425046.4	ZNF367		chrZ	42099783	42284007	184224					Transcription factors	DNA-binding	Transcription, Transcription regulation					no result	chrZ	-	zf-C2H2
205	ENSGALG00000003403	XM_004948613.1	ZNF385C		chr27	5180922	5245622	64700	N				Predicted intracellular protein							done	chr27	-
206	ENSGALG00000024378	XM_004948755.1	ZNF414		chr28	1723214	1762434	39220					Predicted intracellular protein	Activator, DNA-binding	Transcription, Transcription regulation					done	chr28	-	Zf-C2H2_8
207	ENSGALG00000003891	ENSGALT00000006188.1	ZNF423		chr11	6777395	7125769	348374	Y	Y		TR	Predicted intracellular protein	Activator, Chromatin regulator, Repressor	Transcription, Transcription regulation, Ubl conjugation pathway					done	chr11	+	zf-C2H2
208	ENSGALG00000015451	ENSGALT00000024915.1	ZNF462		chrZ	55098699	55709033	610334	N			TF	Transcription factors	Activator, DNA-binding	Transcription, Transcription regulation	Transcription factor that binds to GC box promoter elements. Activates the transcription of these genes.	C2H2-type zinc finger family			done	chrZ	+	zf-H2C2_5
209	ENSGALG00000026534	XM_004944286.1	ZNF469		chr11	18557803	18610237	52434					Transcription factors	DNA-binding	Transcription, Transcription regulation					done	chr11		zf-C2H2
210	ENSGALG00000004532	XM_414126.2	ZNF507		chr11	9849736	9934354	84618					Transcription factors	DNA-binding	Transcription, Transcription regulation					done	chr11	+	zf-C2H2
211	ENSGALG00000013660	XM_419095.2	ZNF516		chr2	91013310	91223302	209992	Y			TR		Activator, RNA-binding	Biological rhythms, Transcription, Transcription regulation					time out	chr2	+	zf-C2H2
212	ENSGALG00000015112	XM_004939809.1	ZNF521		chr2	103734962	104139800	404838	N											done	chr2	-	zf-C2H2
213	ENSGALG00000000817	XM_004944355.1	ZNF821		chr11	19939186	20073462	134276	Y	Y		TR	Transcription factors	Chromatin regulator, DNA-binding, Methyltransferase, Transferase	Transcription, Transcription regulation	Histone methyltransferase with histone H3 'Lys-27' (H3K27me) methyltransferase activity forming trimethylated 'Lys-27' (H3K27me3).				done	chr11	+	zf-H2C2_4
