# Supplementary material for: A gene regulatory network for neural induction
Source: eLife. 2023 Mar 3;12:e73189. doi: 10.7554/eLife.73189 (PMC10038663; doi:10.7554/eLife.73189)
Supplement: Figure 4—source data 1. [file elife-73189-fig4-data1.xlsx]

## Sheet: 5h
Supplementary Table. NI transcription factor binding sites within regulatory sites 5h after node graft
target gene	chromatin response	chr_galGal5	regulatory_region_start	regulatory_region_end	TF	TF_binding_chr	TF_binding_site_start	TF_binding_site_end
ZNF277	activation	chr1	26953288	26954207	TCF12	chr1	26953292	26953302
ZNF277	activation	chr1	26953288	26954207	TCF12	chr1	26953293	26953303
ZNF277	activation	chr1	26953288	26954207	TFAP2A	chr1	26953414	26953427
ZNF277	activation	chr1	26953288	26954207	TFAP2C	chr1	26953414	26953427
ZNF277	activation	chr1	26953288	26954207	TCF7L1	chr1	26953491	26953502
ZNF277	activation	chr1	26953288	26954207	GRHL2	chr1	26953584	26953595
ZNF277	activation	chr1	26953288	26954207	LHX5	chr1	26953772	26953779
ZNF277	activation	chr1	26953288	26954207	TFAP2A	chr1	26953818	26953831
ZNF277	activation	chr1	26953288	26954207	HIF1A	chr1	26954008	26954017
ZNF277	activation	chr1	26953288	26954207	KLF5	chr1	26954092	26954101
ZNF277	activation	chr1	26953288	26954207	TCF12	chr1	26954114	26954124
ZNF277	activation	chr1	26953288	26954207	TCF12	chr1	26954115	26954125
ZNF277	activation	chr1	26953288	26954207	SNAI1	chr1	26954115	26954124
ZNF277	activation	chr1	26953288	26954207	TCF7L1	chr1	26954159	26954170
ZNF277	activation	chr1	26953288	26954207	TFAP2C	chr1	26954195	26954207
ZNF277	activation	chr1	26953288	26954207	TFAP2A	chr1	26954195	26954207
ZNF277	repression_index_4	chr1	26997665	26999576	EOMES	chr1	26997769	26997781
ZNF277	repression_index_4	chr1	26997665	26999576	TBX3	chr1	26997769	26997778
ZNF277	repression_index_4	chr1	26997665	26999576	MGA	chr1	26997770	26997777
ZNF277	repression_index_4	chr1	26997665	26999576	ETV1	chr1	26997784	26997797
ZNF277	repression_index_4	chr1	26997665	26999576	ETV1	chr1	26998006	26998019
ZNF277	repression_index_4	chr1	26997665	26999576	ELF1	chr1	26998006	26998019
ZNF277	repression_index_4	chr1	26997665	26999576	ETV4	chr1	26998008	26998017
ZNF277	repression_index_4	chr1	26997665	26999576	ZIC2	chr1	26998025	26998038
ZNF277	repression_index_4	chr1	26997665	26999576	OTX2	chr1	26998249	26998260
ZNF277	repression_index_4	chr1	26997665	26999576	GBX2	chr1	26998257	26998266
ZNF277	repression_index_4	chr1	26997665	26999576	LHX5	chr1	26998258	26998265
ZNF277	repression_index_4	chr1	26997665	26999576	FOXA2	chr1	26998406	26998416
ZNF277	repression_index_4	chr1	26997665	26999576	GATA2	chr1	26998450	26998460
ZNF277	repression_index_4	chr1	26997665	26999576	MEIS2	chr1	26998473	26998480
ZNF277	repression_index_4	chr1	26997665	26999576	TCF12	chr1	26998575	26998585
ZNF277	repression_index_4	chr1	26997665	26999576	GRHL1	chr1	26998696	26998707
ZNF277	repression_index_4	chr1	26997665	26999576	MEIS2	chr1	26998755	26998762
ZNF277	repression_index_4	chr1	26997665	26999576	SNAI1	chr1	26998831	26998840
ZNF277	repression_index_4	chr1	26997665	26999576	ZIC2	chr1	26999039	26999052
ZNF277	repression_index_4	chr1	26997665	26999576	ZIC3	chr1	26999040	26999054
ZNF277	repression_index_4	chr1	26997665	26999576	KLF5	chr1	26999049	26999058
ZNF277	repression_index_4	chr1	26997665	26999576	FOXA2	chr1	26999332	26999342
ZNF277	repression_index_4	chr1	27004764	27006441	BACH1	chr1	27004767	27004779
ZNF277	repression_index_4	chr1	27004764	27006441	MAFA	chr1	27004767	27004781
ZNF277	repression_index_4	chr1	27004764	27006441	ZIC2	chr1	27004883	27004896
ZNF277	repression_index_4	chr1	27004764	27006441	TCF12	chr1	27004885	27004895
ZNF277	repression_index_4	chr1	27004764	27006441	SOX3	chr1	27005021	27005030
ZNF277	repression_index_4	chr1	27004764	27006441	SNAI1	chr1	27005116	27005125
ZNF277	repression_index_4	chr1	27004764	27006441	BACH1	chr1	27005118	27005130
ZNF277	repression_index_4	chr1	27004764	27006441	BACH1	chr1	27005120	27005132
ZNF277	repression_index_4	chr1	27004764	27006441	TCF12	chr1	27005216	27005226
ZNF277	repression_index_4	chr1	27004764	27006441	SOX4	chr1	27005263	27005272
ZNF277	repression_index_4	chr1	27004764	27006441	KLF5	chr1	27005388	27005397
ZNF277	repression_index_4	chr1	27004764	27006441	EOMES	chr1	27005512	27005524
ZNF277	repression_index_4	chr1	27004764	27006441	FOXA2	chr1	27005713	27005723
ZNF277	repression_index_4	chr1	27004764	27006441	FOXA2	chr1	27005737	27005747
ZNF277	repression_index_4	chr1	27004764	27006441	NANOG	chr1	27005768	27005778
ZNF277	repression_index_4	chr1	27004764	27006441	SOX13	chr1	27005768	27005778
ZNF277	repression_index_4	chr1	27004764	27006441	GATA2	chr1	27005779	27005789
ZNF277	repression_index_4	chr1	27004764	27006441	LHX5	chr1	27005816	27005823
ZNF277	repression_index_4	chr1	27004764	27006441	SOX3	chr1	27006020	27006029
ZNF277	repression_index_4	chr1	27004764	27006441	SOX4	chr1	27006021	27006030
ZNF277	repression_index_4	chr1	27004764	27006441	MEIS2	chr1	27006039	27006046
ZNF277	repression_index_4	chr1	27004764	27006441	SOX3	chr1	27006047	27006056
ZNF277	repression_index_4	chr1	27004764	27006441	SOX4	chr1	27006048	27006057
ZNF277	repression_index_4	chr1	27004764	27006441	ZIC2	chr1	27006087	27006100
ZNF277	repression_index_4	chr1	27004764	27006441	SOX3	chr1	27006281	27006290
ZNF277	repression_index_4	chr1	27004764	27006441	MEIS2	chr1	27006363	27006370
ZNF277	repression_index_4	chr1	27004764	27006441	ETV4	chr1	27006369	27006378
ZNF277	activation	chr1	27011998	27012322	TFAP2A	chr1	27012015	27012028
ZNF277	activation	chr1	27011998	27012322	MEIS2	chr1	27012033	27012040
ZNF277	activation	chr1	27011998	27012322	KLF5	chr1	27012066	27012075
ZNF277	activation	chr1	27011998	27012322	ELF1	chr1	27012066	27012079
ZNF277	activation	chr1	27011998	27012322	TCF12	chr1	27012084	27012094
ZNF277	activation	chr1	27011998	27012322	TCF12	chr1	27012085	27012095
ZNF277	activation	chr1	27011998	27012322	TFAP2C	chr1	27012091	27012102
ZNF277	activation	chr1	27011998	27012322	TFAP2C	chr1	27012091	27012104
ZNF277	activation	chr1	27011998	27012322	TFAP2A	chr1	27012091	27012102
ZNF277	activation	chr1	27011998	27012322	ETV1	chr1	27012192	27012205
ZNF277	activation	chr1	27011998	27012322	ETV4	chr1	27012194	27012203
ZNF277	activation	chr1	27011998	27012322	ELF1	chr1	27012235	27012248
ZNF277	activation	chr1	27011998	27012322	ETV1	chr1	27012235	27012248
ZNF277	activation	chr1	27011998	27012322	ETV4	chr1	27012237	27012246
ZNF277	activation	chr1	27011998	27012322	ETV5	chr1	27012237	27012247
ZNF277	activation	chr1	27049189	27050145	CDX2	chr1	27049198	27049209
ZNF277	activation	chr1	27049189	27050145	MEF2D	chr1	27049200	27049211
ZNF277	activation	chr1	27049189	27050145	ESRRG	chr1	27049383	27049392
ZNF277	activation	chr1	27049189	27050145	NFKB2	chr1	27049492	27049504
ZNF277	activation	chr1	27049189	27050145	FOXA2	chr1	27049658	27049668
ZNF277	activation	chr1	27049189	27050145	GBX2	chr1	27049708	27049717
ZNF277	activation	chr1	27049189	27050145	MSX1	chr1	27049709	27049716
ZNF277	activation	chr1	27049189	27050145	HIC2	chr1	27049739	27049747
ZNF277	activation	chr1	27049189	27050145	ZIC2	chr1	27049767	27049780
ZNF277	activation	chr1	27049189	27050145	MEIS2	chr1	27049791	27049805
ZNF277	activation	chr1	27049189	27050145	TCF7L1	chr1	27050131	27050142
ZNF277	activation	chr1	27050351	27051782	FOXA2	chr1	27050362	27050372
ZNF277	activation	chr1	27050351	27051782	MEIS2	chr1	27050621	27050635
ZNF277	activation	chr1	27050351	27051782	SOX3	chr1	27050794	27050803
ZNF277	activation	chr1	27050351	27051782	TFAP2C	chr1	27051004	27051017
ZNF277	activation	chr1	27050351	27051782	TFAP2A	chr1	27051004	27051017
ZNF277	activation	chr1	27050351	27051782	SOX3	chr1	27051027	27051036
ZNF277	activation	chr1	27050351	27051782	HIC2	chr1	27051041	27051049
ZNF277	activation	chr1	27050351	27051782	ELF1	chr1	27051052	27051065
ZNF277	activation	chr1	27050351	27051782	ETV1	chr1	27051052	27051065
ZNF277	activation	chr1	27050351	27051782	ETV4	chr1	27051054	27051063
ZNF277	activation	chr1	27050351	27051782	ZIC2	chr1	27051377	27051390
ZNF277	activation	chr1	27050351	27051782	TCF12	chr1	27051629	27051639
ZNF277	activation	chr1	27050351	27051782	ZIC3	chr1	27051672	27051686
ZNF277	activation	chr1	27050351	27051782	TCF12	chr1	27051673	27051683
ZNF277	activation	chr1	27050351	27051782	SNAI1	chr1	27051673	27051682
ZNF277	activation	chr1	27050351	27051782	ZIC2	chr1	27051674	27051687
ZNF277	activation	chr1	27069578	27071983	KLF5	chr1	27069614	27069623
ZNF277	activation	chr1	27069578	27071983	TCF7L1	chr1	27069823	27069834
ZNF277	activation	chr1	27069578	27071983	CDX2	chr1	27070134	27070145
ZNF277	activation	chr1	27069578	27071983	MEIS2	chr1	27070149	27070163
ZNF277	activation	chr1	27069578	27071983	BACH1	chr1	27070301	27070313
ZNF277	activation	chr1	27069578	27071983	LHX5	chr1	27070488	27070495
ZNF277	activation	chr1	27069578	27071983	KLF5	chr1	27070617	27070626
ZNF277	activation	chr1	27069578	27071983	TCF12	chr1	27070628	27070638
ZNF277	activation	chr1	27069578	27071983	TCF12	chr1	27070686	27070696
ZNF277	activation	chr1	27069578	27071983	TCF7L1	chr1	27070864	27070875
ZNF277	activation	chr1	27069578	27071983	TCF12	chr1	27071096	27071106
ZNF277	activation	chr1	27069578	27071983	SNAI1	chr1	27071097	27071106
ZNF277	activation	chr1	27069578	27071983	GRHL2	chr1	27071097	27071108
ZNF277	activation	chr1	27069578	27071983	NFKB2	chr1	27071390	27071402
ZNF277	activation	chr1	27069578	27071983	TFAP2C	chr1	27071683	27071696
ZNF277	activation	chr1	27069578	27071983	TFAP2A	chr1	27071683	27071696
ZNF277	activation	chr1	27069578	27071983	TFAP2A	chr1	27071684	27071697
ZNF277	activation	chr1	27069578	27071983	TFAP2C	chr1	27071685	27071696
ZNF277	activation	chr1	27069578	27071983	TFAP2A	chr1	27071685	27071696
ZNF277	activation	chr1	27089317	27092301	GATA2	chr1	27089468	27089478
ZNF277	activation	chr1	27089317	27092301	CDX2	chr1	27089960	27089971
ZNF277	activation	chr1	27089317	27092301	ESRRG	chr1	27089969	27089978
ZNF277	activation	chr1	27089317	27092301	ELF1	chr1	27090082	27090095
ZNF277	activation	chr1	27089317	27092301	HIC2	chr1	27090127	27090135
ZNF277	activation	chr1	27089317	27092301	GATA2	chr1	27090523	27090533
ZNF277	activation	chr1	27089317	27092301	NANOG	chr1	27090685	27090695
ZNF277	activation	chr1	27089317	27092301	ETV1	chr1	27090715	27090728
ZNF277	activation	chr1	27089317	27092301	ETV4	chr1	27090717	27090726
ZNF277	activation	chr1	27089317	27092301	ZIC2	chr1	27090768	27090781
ZNF277	activation	chr1	27089317	27092301	GRHL2	chr1	27090875	27090886
ZNF277	activation	chr1	27089317	27092301	MEIS2	chr1	27091182	27091196
ZNF277	activation	chr1	27089317	27092301	GBX2	chr1	27091197	27091206
ZNF277	activation	chr1	27089317	27092301	MSX1	chr1	27091198	27091205
ZNF277	activation	chr1	27089317	27092301	TFAP2A	chr1	27091507	27091519
ZNF277	activation	chr1	27089317	27092301	TFAP2C	chr1	27091507	27091519
ZNF277	activation	chr1	27089317	27092301	TCF12	chr1	27091585	27091595
ZNF277	activation	chr1	27089317	27092301	MEIS2	chr1	27091621	27091635
ZNF277	activation	chr1	27089317	27092301	TCF12	chr1	27091765	27091775
ZNF277	activation	chr1	27089317	27092301	TCF12	chr1	27091766	27091776
ZNF277	activation	chr1	27089317	27092301	SNAI1	chr1	27091766	27091775
ZNF277	activation	chr1	27089317	27092301	SOX13	chr1	27091847	27091857
ZNF277	activation	chr1	27089317	27092301	NANOG	chr1	27091847	27091857
ZNF277	activation	chr1	27089317	27092301	SOX4	chr1	27091847	27091856
ZNF277	activation	chr1	27089317	27092301	ZIC2	chr1	27091910	27091923
ZNF277	activation	chr1	27089317	27092301	MEIS2	chr1	27092219	27092233
ZNF277	activation	chr1	27089317	27092301	TFAP2C	chr1	27092283	27092294
ZNF277	activation	chr1	27089317	27092301	TFAP2A	chr1	27092283	27092294
ZNF277	activation	chr1	27092742	27094417	PITX2	chr1	27092869	27092876
ZNF277	activation	chr1	27092742	27094417	OTX2	chr1	27092911	27092922
ZNF277	activation	chr1	27092742	27094417	PITX2	chr1	27092913	27092920
ZNF277	activation	chr1	27092742	27094417	LHX5	chr1	27093143	27093150
ZNF277	activation	chr1	27092742	27094417	GBX2	chr1	27093317	27093326
ZNF277	activation	chr1	27092742	27094417	MEIS2	chr1	27093453	27093460
ZNF277	activation	chr1	27092742	27094417	CDX2	chr1	27093602	27093613
ZNF277	activation	chr1	27092742	27094417	TCF12	chr1	27094107	27094117
ZNF277	activation	chr1	27092742	27094417	KLF5	chr1	27094340	27094349
ZNF277	activation	chr1	27094952	27096068	ZNF423	chr1	27095190	27095204
ZNF277	activation	chr1	27094952	27096068	MAFA	chr1	27095279	27095293
ZNF277	activation	chr1	27094952	27096068	BACH1	chr1	27095408	27095420
ZNF277	activation	chr1	27094952	27096068	HIF1A	chr1	27095648	27095657
ZNF277	activation	chr1	27094952	27096068	TCF12	chr1	27095727	27095737
ZNF277	activation	chr1	27094952	27096068	TCF12	chr1	27095858	27095868
ZNF277	activation	chr1	27094952	27096068	SNAI1	chr1	27095859	27095868
ZNF277	activation	chr1	27094952	27096068	TCF12	chr1	27095859	27095869
ZNF277	activation	chr1	27094952	27096068	MAFA	chr1	27095974	27095988
ZNF277	repression_index_4	chr1	27288600	27288929	TCF12	chr1	27288816	27288826
ZNF277	repression_index_4	chr1	27288600	27288929	GATA2	chr1	27288835	27288845
HMGA2	activation	chr1	34197249	34197797	TCF12	chr1	34197267	34197277
HMGA2	activation	chr1	34197249	34197797	TCF12	chr1	34197268	34197278
HMGA2	activation	chr1	34197249	34197797	ZIC2	chr1	34197285	34197298
HMGA2	activation	chr1	34197249	34197797	TCF12	chr1	34197289	34197299
HMGA2	activation	chr1	34197249	34197797	SNAI1	chr1	34197290	34197299
HMGA2	activation	chr1	34197249	34197797	TCF12	chr1	34197290	34197300
HMGA2	activation	chr1	34197249	34197797	MEIS2	chr1	34197464	34197471
HMGA2	activation	chr1	34197249	34197797	TCF12	chr1	34197495	34197505
HMGA2	activation	chr1	34197249	34197797	TCF12	chr1	34197496	34197506
HMGA2	activation	chr1	34197249	34197797	MAFA	chr1	34197537	34197551
HMGA2	activation	chr1	34197249	34197797	ZIC2	chr1	34197542	34197555
HMGA2	activation	chr1	34197249	34197797	TCF12	chr1	34197677	34197687
HMGA2	activation	chr1	34197249	34197797	SOX4	chr1	34197774	34197783
HMGA2	activation	chr1	34197249	34197797	SOX3	chr1	34197775	34197784
HMGA2	activation	chr1	34211133	34212218	OTX2	chr1	34211218	34211229
HMGA2	activation	chr1	34211133	34212218	GBX2	chr1	34211251	34211260
HMGA2	activation	chr1	34211133	34212218	DLX5	chr1	34211252	34211259
HMGA2	activation	chr1	34211133	34212218	MSX1	chr1	34211252	34211259
HMGA2	activation	chr1	34211133	34212218	TCF12	chr1	34211266	34211276
HMGA2	activation	chr1	34211133	34212218	FOXA2	chr1	34211420	34211430
HMGA2	activation	chr1	34211133	34212218	LHX5	chr1	34211480	34211487
HMGA2	activation	chr1	34211133	34212218	CDX2	chr1	34211528	34211539
HMGA2	activation	chr1	34211133	34212218	EOMES	chr1	34211660	34211672
HMGA2	activation	chr1	34211133	34212218	TBX3	chr1	34211663	34211672
HMGA2	activation	chr1	34211133	34212218	MGA	chr1	34211664	34211671
HMGA2	activation	chr1	34211133	34212218	SOX3	chr1	34211721	34211730
HMGA2	activation	chr1	34211133	34212218	FOXA2	chr1	34211815	34211825
HMGA2	activation	chr1	34211133	34212218	BACH1	chr1	34212040	34212052
HMGA2	activation	chr1	34211133	34212218	SOX3	chr1	34212110	34212119
HMGA2	repression_index_4	chr1	34217534	34218902	HIC2	chr1	34217623	34217631
HMGA2	repression_index_4	chr1	34217534	34218902	ESRRG	chr1	34217760	34217769
HMGA2	repression_index_4	chr1	34217534	34218902	TCF12	chr1	34218086	34218096
HMGA2	repression_index_4	chr1	34217534	34218902	SNAI1	chr1	34218086	34218095
HMGA2	repression_index_4	chr1	34217534	34218902	KLF5	chr1	34218425	34218434
HMGA2	repression_index_4	chr1	34217534	34218902	EOMES	chr1	34218483	34218495
HMGA2	repression_index_4	chr1	34217534	34218902	CDX2	chr1	34218685	34218696
HMGA2	repression_index_4	chr1	34217534	34218902	MEIS2	chr1	34218715	34218729
HMGA2	activation	chr1	34219184	34220527	ETS2	chr1	34219382	34219391
HMGA2	activation	chr1	34219184	34220527	SOX4	chr1	34219475	34219484
HMGA2	activation	chr1	34219184	34220527	SOX3	chr1	34219476	34219485
HMGA2	activation	chr1	34219184	34220527	ETV1	chr1	34219497	34219510
HMGA2	activation	chr1	34219184	34220527	ETV4	chr1	34219499	34219508
HMGA2	activation	chr1	34219184	34220527	FOXA2	chr1	34219550	34219560
HMGA2	activation	chr1	34219184	34220527	CDX2	chr1	34219554	34219565
HMGA2	activation	chr1	34219184	34220527	SNAI1	chr1	34219602	34219611
HMGA2	activation	chr1	34219184	34220527	TCF12	chr1	34219602	34219612
HMGA2	activation	chr1	34219184	34220527	TCF12	chr1	34219724	34219734
HMGA2	activation	chr1	34219184	34220527	SNAI1	chr1	34219724	34219733
HMGA2	activation	chr1	34219184	34220527	ZIC2	chr1	34219725	34219738
HMGA2	activation	chr1	34219184	34220527	CDX2	chr1	34219838	34219849
HMGA2	activation	chr1	34219184	34220527	MAFA	chr1	34219975	34219989
HMGA2	activation	chr1	34219184	34220527	MAFA	chr1	34220003	34220017
HMGA2	activation	chr1	34219184	34220527	GRHL2	chr1	34220027	34220038
HMGA2	activation	chr1	34219184	34220527	GBX2	chr1	34220164	34220173
HMGA2	activation	chr1	34219184	34220527	MSX1	chr1	34220165	34220172
HMGA2	activation	chr1	34219184	34220527	ZIC3	chr1	34220251	34220265
HMGA2	activation	chr1	34219184	34220527	LHX5	chr1	34220350	34220357
HMGA2	activation	chr1	34284240	34284603	ELF1	chr1	34284310	34284323
HMGA2	activation	chr1	34284240	34284603	ETV1	chr1	34284310	34284323
HMGA2	activation	chr1	34284240	34284603	MEIS2	chr1	34284451	34284458
HMGA2	activation	chr1	34284240	34284603	SOX3	chr1	34284503	34284512
HMGA2	activation	chr1	34284240	34284603	SOX4	chr1	34284504	34284513
HMGA2	activation	chr1	34284966	34288725	ESRRG	chr1	34285044	34285053
HMGA2	activation	chr1	34284966	34288725	ZIC2	chr1	34285061	34285074
HMGA2	activation	chr1	34284966	34288725	ELF1	chr1	34285217	34285230
HMGA2	activation	chr1	34284966	34288725	ETV1	chr1	34285217	34285230
HMGA2	activation	chr1	34284966	34288725	ETV4	chr1	34285219	34285228
HMGA2	activation	chr1	34284966	34288725	EOMES	chr1	34285223	34285235
HMGA2	activation	chr1	34284966	34288725	SOX4	chr1	34285300	34285309
HMGA2	activation	chr1	34284966	34288725	SOX3	chr1	34285301	34285310
HMGA2	activation	chr1	34284966	34288725	FOXA2	chr1	34285470	34285480
HMGA2	activation	chr1	34284966	34288725	TBX3	chr1	34285502	34285511
HMGA2	activation	chr1	34284966	34288725	EOMES	chr1	34285502	34285514
HMGA2	activation	chr1	34284966	34288725	SOX3	chr1	34286199	34286208
HMGA2	activation	chr1	34284966	34288725	SOX3	chr1	34286293	34286302
HMGA2	activation	chr1	34284966	34288725	ETV1	chr1	34286406	34286419
HMGA2	activation	chr1	34284966	34288725	ETV4	chr1	34286408	34286417
HMGA2	activation	chr1	34284966	34288725	HES1	chr1	34286619	34286628
HMGA2	activation	chr1	34284966	34288725	OTX2	chr1	34286640	34286651
HMGA2	activation	chr1	34284966	34288725	MEIS2	chr1	34286763	34286770
HMGA2	activation	chr1	34284966	34288725	SOX3	chr1	34286958	34286967
HMGA2	activation	chr1	34284966	34288725	SOX3	chr1	34286963	34286972
HMGA2	activation	chr1	34284966	34288725	RREB1	chr1	34286964	34286983
HMGA2	activation	chr1	34284966	34288725	TFAP2C	chr1	34287016	34287029
HMGA2	activation	chr1	34284966	34288725	TFAP2A	chr1	34287016	34287029
HMGA2	activation	chr1	34284966	34288725	TCF12	chr1	34287121	34287131
HMGA2	activation	chr1	34284966	34288725	TCF12	chr1	34287122	34287132
HMGA2	activation	chr1	34284966	34288725	SNAI1	chr1	34287398	34287407
HMGA2	activation	chr1	34284966	34288725	SOX3	chr1	34287427	34287436
HMGA2	activation	chr1	34284966	34288725	SOX4	chr1	34287428	34287437
HMGA2	activation	chr1	34284966	34288725	HOXA1	chr1	34287477	34287484
HMGA2	activation	chr1	34284966	34288725	LHX5	chr1	34287477	34287484
HMGA2	activation	chr1	34284966	34288725	DLX5	chr1	34287477	34287484
HMGA2	activation	chr1	34284966	34288725	SOX4	chr1	34287510	34287519
HMGA2	activation	chr1	34284966	34288725	TBX3	chr1	34287570	34287579
HMGA2	activation	chr1	34284966	34288725	MEIS2	chr1	34287703	34287717
HMGA2	activation	chr1	34284966	34288725	TFAP2C	chr1	34287729	34287742
HMGA2	activation	chr1	34284966	34288725	TFAP2A	chr1	34287729	34287742
HMGA2	activation	chr1	34284966	34288725	TFAP2C	chr1	34287730	34287743
HMGA2	activation	chr1	34284966	34288725	TFAP2A	chr1	34287730	34287743
HMGA2	activation	chr1	34284966	34288725	FOXA2	chr1	34287796	34287806
HMGA2	activation	chr1	34284966	34288725	SOX4	chr1	34287800	34287809
HMGA2	activation	chr1	34284966	34288725	OTX2	chr1	34288046	34288057
HMGA2	activation	chr1	34284966	34288725	PITX2	chr1	34288048	34288055
HMGA2	activation	chr1	34284966	34288725	ETV1	chr1	34288060	34288073
HMGA2	activation	chr1	34284966	34288725	ELF1	chr1	34288060	34288073
HMGA2	activation	chr1	34284966	34288725	ETV4	chr1	34288062	34288071
HMGA2	activation	chr1	34284966	34288725	ETV4	chr1	34288066	34288075
HMGA2	activation	chr1	34284966	34288725	ETV1	chr1	34288073	34288086
HMGA2	activation	chr1	34284966	34288725	ETV4	chr1	34288075	34288084
HMGA2	activation	chr1	34284966	34288725	RREB1	chr1	34288125	34288144
HMGA2	activation	chr1	34284966	34288725	SOX3	chr1	34288179	34288188
HMGA2	activation	chr1	34284966	34288725	GATA2	chr1	34288208	34288218
HMGA2	activation	chr1	34284966	34288725	TBX3	chr1	34288256	34288265
HMGA2	activation	chr1	34284966	34288725	MGA	chr1	34288257	34288264
HMGA2	activation	chr1	34284966	34288725	ETV4	chr1	34288316	34288325
HMGA2	activation	chr1	34284966	34288725	KLF5	chr1	34288321	34288330
HMGA2	activation	chr1	34284966	34288725	TCF12	chr1	34288461	34288471
HMGA2	activation	chr1	34284966	34288725	MYC	chr1	34288461	34288472
HMGA2	activation	chr1	34284966	34288725	SNAI1	chr1	34288462	34288471
HMGA2	activation	chr1	34284966	34288725	TCF12	chr1	34288462	34288472
HMGA2	activation	chr1	34284966	34288725	HIC2	chr1	34288466	34288474
HMGA2	activation	chr1	34284966	34288725	MEIS2	chr1	34288513	34288520
HMGA2	activation	chr1	34284966	34288725	RREB1	chr1	34288524	34288543
HMGA2	activation	chr1	34284966	34288725	TFAP2A	chr1	34288605	34288618
HMGA2	activation	chr1	34284966	34288725	TFAP2C	chr1	34288605	34288618
HMGA2	activation	chr1	34284966	34288725	KLF5	chr1	34288713	34288722
HMGA2	activation	chr1	34292974	34294283	ZIC2	chr1	34293083	34293096
HMGA2	activation	chr1	34292974	34294283	SOX4	chr1	34293112	34293121
HMGA2	activation	chr1	34292974	34294283	FOXA2	chr1	34293517	34293527
HMGA2	activation	chr1	34292974	34294283	MYCN	chr1	34293781	34293792
HMGA2	activation	chr1	34292974	34294283	BHLHE40	chr1	34293828	34293837
HMGA2	activation	chr1	34292974	34294283	ZIC2	chr1	34293867	34293880
HMGA2	activation	chr1	34292974	34294283	GRHL2	chr1	34293984	34293995
HMGA2	activation	chr1	34292974	34294283	GRHL1	chr1	34293984	34293995
HMGA2	activation	chr1	34292974	34294283	GRHL3	chr1	34293984	34293995
HMGA2	activation	chr1	34344051	34345682	ELF1	chr1	34344269	34344282
HMGA2	activation	chr1	34344051	34345682	KLF5	chr1	34344273	34344282
HMGA2	activation	chr1	34344051	34345682	BACH1	chr1	34344358	34344370
HMGA2	activation	chr1	34344051	34345682	BACH1	chr1	34344371	34344383
HMGA2	activation	chr1	34344051	34345682	BACH1	chr1	34344437	34344449
HMGA2	activation	chr1	34344051	34345682	BACH1	chr1	34344480	34344492
HMGA2	activation	chr1	34344051	34345682	HES1	chr1	34344490	34344499
HMGA2	activation	chr1	34344051	34345682	TBX3	chr1	34344658	34344667
HMGA2	activation	chr1	34344051	34345682	ETV1	chr1	34344885	34344898
HMGA2	activation	chr1	34344051	34345682	ZIC2	chr1	34344913	34344926
HMGA2	activation	chr1	34344051	34345682	TFAP2C	chr1	34344916	34344929
HMGA2	activation	chr1	34344051	34345682	SOX3	chr1	34345122	34345131
HMGA2	activation	chr1	34344051	34345682	ETV4	chr1	34345359	34345368
HMGA2	activation	chr1	34344051	34345682	MYCN	chr1	34345472	34345483
HMGA2	activation	chr1	34344051	34345682	MYC	chr1	34345472	34345483
HMGA2	activation	chr1	34344051	34345682	ETV1	chr1	34345480	34345493
HMGA2	activation	chr1	34344051	34345682	ELF1	chr1	34345480	34345493
HMGA2	activation	chr1	34344051	34345682	ETV4	chr1	34345482	34345491
HMGA2	activation	chr1	34344051	34345682	ESRRG	chr1	34345624	34345633
HMGA2	activation	chr1	34344051	34345682	HIC2	chr1	34345652	34345660
YEATS4	activation	chr1	35433954	35434634	TFAP2C	chr1	35433970	35433981
YEATS4	activation	chr1	35433954	35434634	TFAP2A	chr1	35433970	35433981
YEATS4	activation	chr1	35433954	35434634	ZIC2	chr1	35434008	35434021
YEATS4	activation	chr1	35433954	35434634	ZIC3	chr1	35434009	35434023
YEATS4	activation	chr1	35433954	35434634	NANOG	chr1	35434268	35434278
YEATS4	activation	chr1	35433954	35434634	SOX13	chr1	35434268	35434278
YEATS4	activation	chr1	35433954	35434634	GBX2	chr1	35434581	35434590
YEATS4	activation	chr1	35433954	35434634	MSX1	chr1	35434582	35434589
YEATS4	activation	chr1	35434840	35435207	HIC2	chr1	35434846	35434854
YEATS4	activation	chr1	35434840	35435207	TCF12	chr1	35434864	35434874
YEATS4	activation	chr1	35434840	35435207	TCF12	chr1	35434865	35434875
YEATS4	activation	chr1	35434840	35435207	MAFA	chr1	35434926	35434940
YEATS4	activation	chr1	35436589	35437592	MYCN	chr1	35436595	35436606
YEATS4	activation	chr1	35436589	35437592	MYC	chr1	35436595	35436606
YEATS4	activation	chr1	35436589	35437592	HEY1	chr1	35436596	35436605
YEATS4	activation	chr1	35436589	35437592	HES1	chr1	35436596	35436605
YEATS4	activation	chr1	35436589	35437592	TFAP2C	chr1	35436697	35436710
YEATS4	activation	chr1	35436589	35437592	TFAP2A	chr1	35436697	35436710
YEATS4	activation	chr1	35436589	35437592	TFAP2A	chr1	35436698	35436711
YEATS4	activation	chr1	35436589	35437592	TFAP2C	chr1	35436698	35436711
YEATS4	activation	chr1	35436589	35437592	ETV1	chr1	35436768	35436781
YEATS4	activation	chr1	35436589	35437592	ELF1	chr1	35436768	35436781
YEATS4	activation	chr1	35436589	35437592	ETV4	chr1	35436770	35436779
YEATS4	activation	chr1	35436589	35437592	SOX3	chr1	35436987	35436996
YEATS4	activation	chr1	35436589	35437592	RREB1	chr1	35437052	35437071
YEATS4	activation	chr1	35436589	35437592	CDX2	chr1	35437115	35437126
YEATS4	activation	chr1	35436589	35437592	FOXA2	chr1	35437169	35437179
YEATS4	activation	chr1	35436589	35437592	TCF7L1	chr1	35437272	35437283
YEATS4	activation	chr1	35436589	35437592	CDX2	chr1	35437318	35437329
YEATS4	activation	chr1	35436589	35437592	MEIS2	chr1	35437319	35437333
YEATS4	activation	chr1	35456321	35457396	MYC	chr1	35456486	35456497
YEATS4	activation	chr1	35456321	35457396	MYCN	chr1	35456486	35456497
YEATS4	activation	chr1	35456321	35457396	HEY1	chr1	35456487	35456496
YEATS4	activation	chr1	35456321	35457396	ZIC2	chr1	35456540	35456553
YEATS4	activation	chr1	35456321	35457396	OTX2	chr1	35456581	35456592
YEATS4	activation	chr1	35456321	35457396	PITX2	chr1	35456583	35456590
YEATS4	activation	chr1	35456321	35457396	GATA2	chr1	35456620	35456630
YEATS4	activation	chr1	35456321	35457396	MEIS2	chr1	35456791	35456798
YEATS4	activation	chr1	35456321	35457396	TFAP2C	chr1	35456813	35456824
YEATS4	activation	chr1	35456321	35457396	TFAP2A	chr1	35456813	35456824
YEATS4	activation	chr1	35456321	35457396	KLF5	chr1	35457000	35457009
YEATS4	activation	chr1	35456321	35457396	ETV1	chr1	35457133	35457146
YEATS4	activation	chr1	35456321	35457396	ETS2	chr1	35457136	35457145
YEATS4	activation	chr1	35456321	35457396	SOX13	chr1	35457324	35457334
YEATS4	activation	chr1	35456321	35457396	NANOG	chr1	35457324	35457334
YEATS4	activation	chr1	35506382	35506575	SOX3	chr1	35506484	35506493
YEATS4	activation	chr1	35506382	35506575	MEIS2	chr1	35506562	35506569
YEATS4	activation	chr1	35519435	35520351	TFAP2A	chr1	35519613	35519626
YEATS4	activation	chr1	35519435	35520351	TFAP2C	chr1	35519620	35519633
YEATS4	activation	chr1	35519435	35520351	BACH1	chr1	35519690	35519702
YEATS4	activation	chr1	35519435	35520351	TCF12	chr1	35519720	35519730
YEATS4	activation	chr1	35519435	35520351	TCF12	chr1	35519721	35519731
YEATS4	activation	chr1	35519435	35520351	SNAI1	chr1	35519826	35519835
YEATS4	activation	chr1	35519435	35520351	GRHL2	chr1	35519925	35519936
YEATS4	activation	chr1	35519435	35520351	GRHL1	chr1	35519925	35519936
YEATS4	activation	chr1	35519435	35520351	GRHL3	chr1	35519925	35519936
YEATS4	activation	chr1	35519435	35520351	TCF12	chr1	35519983	35519993
YEATS4	activation	chr1	35519435	35520351	KLF5	chr1	35520031	35520040
YEATS4	activation	chr1	35519435	35520351	TCF12	chr1	35520111	35520121
YEATS4	activation	chr1	35519435	35520351	TCF12	chr1	35520216	35520226
YEATS4	activation	chr1	35519435	35520351	SNAI1	chr1	35520216	35520225
YEATS4	activation	chr1	35519435	35520351	EOMES	chr1	35520266	35520278
YEATS4	activation	chr1	35519435	35520351	TBX3	chr1	35520269	35520278
YEATS4	activation	chr1	35519435	35520351	MGA	chr1	35520270	35520277
YEATS4	activation	chr1	35519435	35520351	SOX4	chr1	35520279	35520288
YEATS4	activation	chr1	35546217	35546926	TCF12	chr1	35546385	35546395
YEATS4	activation	chr1	35546217	35546926	BACH1	chr1	35546391	35546403
YEATS4	activation	chr1	35546217	35546926	TCF7L1	chr1	35546441	35546452
YEATS4	activation	chr1	35546217	35546926	MYC	chr1	35546509	35546520
YEATS4	activation	chr1	35546217	35546926	HIF1A	chr1	35546509	35546518
YEATS4	activation	chr1	35546217	35546926	HEY1	chr1	35546510	35546519
YEATS4	activation	chr1	35546217	35546926	HES1	chr1	35546510	35546519
YEATS4	activation	chr1	35546217	35546926	BHLHE40	chr1	35546510	35546519
CSRP2	activation	chr1	38251622	38252145	KLF5	chr1	38251654	38251663
CSRP2	activation	chr1	38251622	38252145	ZIC2	chr1	38251688	38251701
CSRP2	activation	chr1	38251622	38252145	MEIS2	chr1	38251698	38251705
CSRP2	activation	chr1	38251622	38252145	TFAP2A	chr1	38251732	38251745
CSRP2	activation	chr1	38251622	38252145	TFAP2C	chr1	38251732	38251745
CSRP2	activation	chr1	38251622	38252145	MAFA	chr1	38251760	38251774
CSRP2	activation	chr1	38251622	38252145	TCF12	chr1	38251827	38251837
CSRP2	activation	chr1	38251622	38252145	MAFA	chr1	38251830	38251844
CSRP2	activation	chr1	38251622	38252145	TCF12	chr1	38251839	38251849
CSRP2	activation	chr1	38251622	38252145	SNAI1	chr1	38251840	38251849
CSRP2	activation	chr1	38251622	38252145	ZIC2	chr1	38251869	38251882
CSRP2	activation	chr1	38251622	38252145	ZIC2	chr1	38251881	38251894
CSRP2	activation	chr1	38251622	38252145	SOX3	chr1	38251889	38251898
CSRP2	activation	chr1	38251622	38252145	SOX4	chr1	38251890	38251899
CSRP2	activation	chr1	38251622	38252145	SOX3	chr1	38251983	38251992
CSRP2	activation	chr1	38251622	38252145	SOX3	chr1	38252008	38252017
CSRP2	activation	chr1	38251622	38252145	RREB1	chr1	38252019	38252038
CSRP2	activation	chr1	38254097	38255804	GATA2	chr1	38254291	38254301
CSRP2	activation	chr1	38254097	38255804	SOX3	chr1	38254330	38254339
CSRP2	activation	chr1	38254097	38255804	ELF1	chr1	38254455	38254468
CSRP2	activation	chr1	38254097	38255804	TFAP2C	chr1	38254557	38254568
CSRP2	activation	chr1	38254097	38255804	TFAP2A	chr1	38254557	38254568
CSRP2	activation	chr1	38254097	38255804	KLF5	chr1	38254595	38254604
CSRP2	activation	chr1	38254097	38255804	TCF12	chr1	38254654	38254664
CSRP2	activation	chr1	38254097	38255804	TCF12	chr1	38254655	38254665
CSRP2	activation	chr1	38254097	38255804	TFAP2A	chr1	38254661	38254673
CSRP2	activation	chr1	38254097	38255804	TFAP2C	chr1	38254661	38254673
CSRP2	activation	chr1	38254097	38255804	TFAP2C	chr1	38254661	38254672
CSRP2	activation	chr1	38254097	38255804	TFAP2A	chr1	38254661	38254672
CSRP2	activation	chr1	38254097	38255804	TFAP2A	chr1	38254661	38254674
CSRP2	activation	chr1	38254097	38255804	TFAP2C	chr1	38254661	38254674
CSRP2	activation	chr1	38254097	38255804	TFAP2A	chr1	38254662	38254673
CSRP2	activation	chr1	38254097	38255804	TFAP2C	chr1	38254662	38254673
CSRP2	activation	chr1	38254097	38255804	ESRRG	chr1	38254686	38254695
CSRP2	activation	chr1	38254097	38255804	DLX5	chr1	38254694	38254701
CSRP2	activation	chr1	38254097	38255804	MSX1	chr1	38254694	38254701
CSRP2	activation	chr1	38254097	38255804	TFAP2C	chr1	38254785	38254798
CSRP2	activation	chr1	38254097	38255804	TFAP2A	chr1	38254785	38254798
CSRP2	activation	chr1	38254097	38255804	MAFA	chr1	38254795	38254809
CSRP2	activation	chr1	38254097	38255804	ZIC2	chr1	38254800	38254813
CSRP2	activation	chr1	38254097	38255804	TCF12	chr1	38254804	38254814
CSRP2	activation	chr1	38254097	38255804	MYC	chr1	38254804	38254815
CSRP2	activation	chr1	38254097	38255804	SNAI1	chr1	38254805	38254814
CSRP2	activation	chr1	38254097	38255804	TCF12	chr1	38254805	38254815
CSRP2	activation	chr1	38254097	38255804	SNAI1	chr1	38254819	38254828
CSRP2	activation	chr1	38254097	38255804	ZIC2	chr1	38255323	38255336
CSRP2	activation	chr1	38254097	38255804	ZIC2	chr1	38255401	38255414
CSRP2	activation	chr1	38254097	38255804	ZIC3	chr1	38255402	38255416
CSRP2	activation	chr1	38254097	38255804	MAFA	chr1	38255695	38255709
CSRP2	activation	chr1	38254097	38255804	MEIS2	chr1	38255736	38255743
ATF7IP	repression_index_4	chr1	48830550	48831074	ZIC2	chr1	48830609	48830622
ATF7IP	repression_index_4	chr1	48830550	48831074	TCF12	chr1	48830702	48830712
ATF7IP	repression_index_4	chr1	48830550	48831074	TCF12	chr1	48830724	48830734
ATF7IP	repression_index_4	chr1	48830550	48831074	TCF12	chr1	48830725	48830735
ATF7IP	repression_index_4	chr1	48830550	48831074	ETV4	chr1	48830898	48830907
ATF7IP	repression_index_4	chr1	48830550	48831074	NANOG	chr1	48830939	48830949
ATF7IP	repression_index_4	chr1	48830550	48831074	SOX13	chr1	48830939	48830949
ATF7IP	repression_index_4	chr1	48830550	48831074	MSX1	chr1	48830985	48830992
ATF7IP	repression_index_4	chr1	48830550	48831074	DLX5	chr1	48830985	48830992
ATF7IP	repression_index_4	chr1	48879277	48879780	MAFA	chr1	48879348	48879362
ATF7IP	repression_index_4	chr1	48879277	48879780	BACH1	chr1	48879350	48879362
ATF7IP	repression_index_4	chr1	48879277	48879780	ZIC2	chr1	48879353	48879366
ATF7IP	repression_index_4	chr1	48879277	48879780	GRHL2	chr1	48879356	48879367
ATF7IP	repression_index_4	chr1	48879277	48879780	BACH1	chr1	48879583	48879595
ATF7IP	repression_index_4	chr1	48879277	48879780	GRHL2	chr1	48879704	48879715
ATF7IP	repression_index_4	chr1	48879277	48879780	GRHL1	chr1	48879704	48879715
ATF7IP	repression_index_4	chr1	48908942	48909924	SOX3	chr1	48909067	48909076
ATF7IP	repression_index_4	chr1	48908942	48909924	SOX4	chr1	48909176	48909185
ATF7IP	repression_index_4	chr1	48908942	48909924	SOX3	chr1	48909177	48909186
ATF7IP	repression_index_4	chr1	48908942	48909924	TCF12	chr1	48909292	48909302
ATF7IP	repression_index_4	chr1	48908942	48909924	SOX3	chr1	48909359	48909368
ATF7IP	repression_index_4	chr1	48908942	48909924	FOXA2	chr1	48909568	48909578
ATF7IP	repression_index_4	chr1	48908942	48909924	GRHL2	chr1	48909665	48909676
ATF7IP	repression_index_4	chr1	48908942	48909924	ZIC2	chr1	48909682	48909695
ATF7IP	repression_index_4	chr1	48908942	48909924	SOX4	chr1	48909750	48909759
ATF7IP	repression_index_4	chr1	48908942	48909924	SOX13	chr1	48909828	48909838
ATF7IP	activation	chr1	48929323	48930815	ELF1	chr1	48929325	48929338
ATF7IP	activation	chr1	48929323	48930815	ETV1	chr1	48929325	48929338
ATF7IP	activation	chr1	48929323	48930815	ETV4	chr1	48929327	48929336
ATF7IP	activation	chr1	48929323	48930815	LHX5	chr1	48929451	48929458
ATF7IP	activation	chr1	48929323	48930815	GATA2	chr1	48929519	48929529
ATF7IP	activation	chr1	48929323	48930815	MYCN	chr1	48929592	48929603
ATF7IP	activation	chr1	48929323	48930815	MYC	chr1	48929592	48929603
ATF7IP	activation	chr1	48929323	48930815	HEY1	chr1	48929593	48929602
ATF7IP	activation	chr1	48929323	48930815	HES1	chr1	48929593	48929602
ATF7IP	activation	chr1	48929323	48930815	BACH1	chr1	48929597	48929609
ATF7IP	activation	chr1	48929323	48930815	TCF12	chr1	48929684	48929694
ATF7IP	activation	chr1	48929323	48930815	SOX4	chr1	48929707	48929716
ATF7IP	activation	chr1	48929323	48930815	TCF12	chr1	48929722	48929732
ATF7IP	activation	chr1	48929323	48930815	TCF12	chr1	48929723	48929733
ATF7IP	activation	chr1	48929323	48930815	SNAI1	chr1	48929723	48929732
ATF7IP	activation	chr1	48929323	48930815	ZIC2	chr1	48929724	48929737
ATF7IP	activation	chr1	48929323	48930815	ZIC2	chr1	48929785	48929798
ATF7IP	activation	chr1	48929323	48930815	ZIC2	chr1	48929800	48929813
ATF7IP	activation	chr1	48929323	48930815	FOXA2	chr1	48929833	48929843
ATF7IP	activation	chr1	48929323	48930815	CDX2	chr1	48929851	48929862
ATF7IP	activation	chr1	48929323	48930815	TFAP2A	chr1	48929974	48929986
ATF7IP	activation	chr1	48929323	48930815	CDX2	chr1	48930092	48930103
ATF7IP	activation	chr1	48929323	48930815	MYCN	chr1	48930370	48930381
ATF7IP	activation	chr1	48929323	48930815	TFAP2A	chr1	48930370	48930382
ATF7IP	activation	chr1	48929323	48930815	KLF5	chr1	48930486	48930495
ATF7IP	activation	chr1	48929323	48930815	MEIS2	chr1	48930546	48930553
ATF7IP	activation	chr1	48929323	48930815	TCF12	chr1	48930554	48930564
ATF7IP	activation	chr1	48929323	48930815	TCF12	chr1	48930555	48930565
ATF7IP	activation	chr1	48929323	48930815	SNAI1	chr1	48930555	48930564
ATF7IP	activation	chr1	48929323	48930815	ZIC2	chr1	48930628	48930641
ATF7IP	activation	chr1	48929323	48930815	ZIC2	chr1	48930641	48930654
ATF7IP	activation	chr1	48929323	48930815	TFAP2A	chr1	48930707	48930718
ATF7IP	activation	chr1	48929323	48930815	TFAP2C	chr1	48930707	48930719
ATF7IP	activation	chr1	48929323	48930815	TFAP2A	chr1	48930707	48930719
ATF7IP	activation	chr1	48929323	48930815	TFAP2C	chr1	48930707	48930718
ATF7IP	activation	chr1	48929323	48930815	TCF12	chr1	48930802	48930812
ATF7IP	activation	chr1	48935830	48938122	EOMES	chr1	48936004	48936016
ATF7IP	activation	chr1	48935830	48938122	TFAP2A	chr1	48936309	48936322
ATF7IP	activation	chr1	48935830	48938122	TFAP2C	chr1	48936309	48936322
ATF7IP	activation	chr1	48935830	48938122	TFAP2A	chr1	48936310	48936323
ATF7IP	activation	chr1	48935830	48938122	TFAP2C	chr1	48936310	48936323
ATF7IP	activation	chr1	48935830	48938122	TFAP2A	chr1	48936310	48936321
ATF7IP	activation	chr1	48935830	48938122	TFAP2C	chr1	48936310	48936321
ATF7IP	activation	chr1	48935830	48938122	SOX3	chr1	48936355	48936364
ATF7IP	activation	chr1	48935830	48938122	SOX4	chr1	48936356	48936365
ATF7IP	activation	chr1	48935830	48938122	ELF1	chr1	48936581	48936594
ATF7IP	activation	chr1	48935830	48938122	ETV1	chr1	48936581	48936594
ATF7IP	activation	chr1	48935830	48938122	ETV4	chr1	48936583	48936592
ATF7IP	activation	chr1	48935830	48938122	LHX5	chr1	48936727	48936734
ATF7IP	activation	chr1	48935830	48938122	TCF12	chr1	48936845	48936855
ATF7IP	activation	chr1	48935830	48938122	TCF12	chr1	48936846	48936856
ATF7IP	activation	chr1	48935830	48938122	HIC2	chr1	48937005	48937013
ATF7IP	activation	chr1	48935830	48938122	TCF12	chr1	48937085	48937095
ATF7IP	activation	chr1	48935830	48938122	TCF12	chr1	48937086	48937096
ATF7IP	activation	chr1	48935830	48938122	CDX2	chr1	48937147	48937158
ATF7IP	activation	chr1	48935830	48938122	SOX3	chr1	48937353	48937362
ATF7IP	activation	chr1	48935830	48938122	MEIS2	chr1	48937417	48937424
ATF7IP	activation	chr1	48935830	48938122	TCF12	chr1	48937838	48937848
ATF7IP	activation	chr1	48935830	48938122	TCF12	chr1	48937839	48937849
ATF7IP	activation	chr1	48935830	48938122	ZIC2	chr1	48937872	48937885
ATF7IP	activation	chr1	48935830	48938122	BACH1	chr1	48937945	48937957
ATF7IP	activation	chr1	48935830	48938122	TCF12	chr1	48938082	48938092
ATF7IP	activation	chr1	48935830	48938122	SNAI1	chr1	48938083	48938092
ATF7IP	activation	chr1	48935830	48938122	PITX2	chr1	48938113	48938120
ATF7IP	repression_index_4	chr1	48990547	48992213	GATA2	chr1	48990633	48990643
ATF7IP	repression_index_4	chr1	48990547	48992213	LHX5	chr1	48990653	48990660
ATF7IP	repression_index_4	chr1	48990547	48992213	ZIC2	chr1	48990931	48990944
ATF7IP	repression_index_4	chr1	48990547	48992213	CDX2	chr1	48991060	48991071
ATF7IP	repression_index_4	chr1	48990547	48992213	ETV4	chr1	48991081	48991090
ATF7IP	repression_index_4	chr1	48990547	48992213	SOX3	chr1	48991127	48991136
ATF7IP	repression_index_4	chr1	48990547	48992213	SOX4	chr1	48991128	48991137
ATF7IP	repression_index_4	chr1	48990547	48992213	ZIC2	chr1	48991226	48991239
ATF7IP	repression_index_4	chr1	48990547	48992213	TFAP2C	chr1	48991364	48991377
ATF7IP	repression_index_4	chr1	48990547	48992213	TFAP2A	chr1	48991364	48991377
ATF7IP	repression_index_4	chr1	48990547	48992213	MEF2D	chr1	48991656	48991667
ATF7IP	repression_index_4	chr1	48990547	48992213	MEF2D	chr1	48991918	48991929
ATF7IP	repression_index_4	chr1	48990547	48992213	CDX2	chr1	48991973	48991984
ATF7IP	repression_index_4	chr1	49013955	49015470	ESRRG	chr1	49014156	49014165
ATF7IP	repression_index_4	chr1	49013955	49015470	ETV4	chr1	49014275	49014284
ATF7IP	repression_index_4	chr1	49013955	49015470	TCF12	chr1	49014284	49014294
ATF7IP	repression_index_4	chr1	49013955	49015470	ETV4	chr1	49014630	49014639
ATF7IP	repression_index_4	chr1	49013955	49015470	KLF5	chr1	49014846	49014855
ATF7IP	repression_index_4	chr1	49013955	49015470	MEIS2	chr1	49014996	49015010
ATF7IP	repression_index_4	chr1	49013955	49015470	CDX2	chr1	49015071	49015082
ATF7IP	repression_index_4	chr1	49013955	49015470	MAFA	chr1	49015137	49015151
ATF7IP	repression_index_4	chr1	49013955	49015470	SOX3	chr1	49015147	49015156
ATF7IP	repression_index_4	chr1	49013955	49015470	TCF7L1	chr1	49015430	49015441
ATF7IP	repression_index_4	chr1	49019142	49019639	SOX13	chr1	49019202	49019212
ATF7IP	repression_index_4	chr1	49019142	49019639	NANOG	chr1	49019202	49019212
ATF7IP	repression_index_4	chr1	49019142	49019639	SOX4	chr1	49019203	49019212
ATF7IP	repression_index_4	chr1	49019142	49019639	SOX3	chr1	49019204	49019213
ATF7IP	repression_index_4	chr1	49019142	49019639	TCF12	chr1	49019542	49019552
MKL1	activation	chr1	49989832	49990013	SOX4	chr1	49989987	49989996
MKL1	activation	chr1	49989832	49990013	SOX3	chr1	49989988	49989997
MKL1	repression_index_4	chr1	49993868	49995666	GRHL1	chr1	49993963	49993974
MKL1	repression_index_4	chr1	49993868	49995666	GRHL2	chr1	49993963	49993974
MKL1	repression_index_4	chr1	49993868	49995666	ESRRG	chr1	49994106	49994115
MKL1	repression_index_4	chr1	49993868	49995666	PITX2	chr1	49994119	49994126
MKL1	repression_index_4	chr1	49993868	49995666	ELF1	chr1	49994218	49994231
MKL1	repression_index_4	chr1	49993868	49995666	ETV1	chr1	49994218	49994231
MKL1	repression_index_4	chr1	49993868	49995666	CDX2	chr1	49994350	49994361
MKL1	repression_index_4	chr1	49993868	49995666	MEIS2	chr1	49994351	49994365
MKL1	repression_index_4	chr1	49993868	49995666	RREB1	chr1	49994444	49994463
MKL1	repression_index_4	chr1	49993868	49995666	SOX3	chr1	49994445	49994454
MKL1	repression_index_4	chr1	49993868	49995666	SOX3	chr1	49994450	49994459
MKL1	repression_index_4	chr1	49993868	49995666	SOX3	chr1	49994455	49994464
MKL1	repression_index_4	chr1	49993868	49995666	SOX13	chr1	49994519	49994529
MKL1	repression_index_4	chr1	49993868	49995666	FOXA2	chr1	49994523	49994533
MKL1	repression_index_4	chr1	49993868	49995666	MEIS2	chr1	49994589	49994603
MKL1	repression_index_4	chr1	49993868	49995666	FOXA2	chr1	49994900	49994910
MKL1	repression_index_4	chr1	49993868	49995666	SOX3	chr1	49994909	49994918
MKL1	repression_index_4	chr1	49993868	49995666	TCF12	chr1	49994917	49994927
MKL1	repression_index_4	chr1	49993868	49995666	TFAP2C	chr1	49995167	49995178
MKL1	repression_index_4	chr1	49993868	49995666	TFAP2A	chr1	49995167	49995178
MKL1	repression_index_4	chr1	49993868	49995666	ZIC2	chr1	49995297	49995310
MKL1	repression_index_4	chr1	49993868	49995666	ETV1	chr1	49995412	49995425
MKL1	repression_index_4	chr1	49993868	49995666	ELF1	chr1	49995412	49995425
MKL1	repression_index_4	chr1	49993868	49995666	ETV4	chr1	49995414	49995423
MKL1	repression_index_4	chr1	49993868	49995666	TFAP2C	chr1	49995427	49995438
MKL1	repression_index_4	chr1	49993868	49995666	TFAP2A	chr1	49995427	49995438
MKL1	repression_index_4	chr1	49993868	49995666	KLF5	chr1	49995471	49995480
MKL1	repression_index_4	chr1	49993868	49995666	DLX5	chr1	49995591	49995598
MKL1	repression_index_4	chr1	49993868	49995666	MSX1	chr1	49995591	49995598
MKL1	repression_index_4	chr1	49993868	49995666	TFAP2A	chr1	49995607	49995620
MKL1	repression_index_4	chr1	49993868	49995666	TFAP2C	chr1	49995609	49995620
MKL1	repression_index_4	chr1	49993868	49995666	TFAP2A	chr1	49995609	49995620
MKL1	repression_index_4	chr1	50002897	50003587	ZIC2	chr1	50002962	50002975
MKL1	repression_index_4	chr1	50002897	50003587	FOXA2	chr1	50003058	50003068
MKL1	repression_index_4	chr1	50002897	50003587	TCF12	chr1	50003063	50003073
MKL1	repression_index_4	chr1	50002897	50003587	MAFA	chr1	50003150	50003164
MKL1	repression_index_4	chr1	50002897	50003587	MAFA	chr1	50003271	50003285
MKL1	repression_index_4	chr1	50002897	50003587	HIF1A	chr1	50003280	50003289
MKL1	repression_index_4	chr1	50002897	50003587	ETV1	chr1	50003356	50003369
MKL1	repression_index_4	chr1	50002897	50003587	ETV4	chr1	50003358	50003367
MKL1	repression_index_4	chr1	50002897	50003587	ETS2	chr1	50003359	50003368
MKL1	repression_index_4	chr1	50002897	50003587	ZIC2	chr1	50003508	50003521
MKL1	repression_index_4	chr1	50036339	50037443	BACH1	chr1	50036376	50036388
MKL1	repression_index_4	chr1	50036339	50037443	SOX3	chr1	50036600	50036609
MKL1	repression_index_4	chr1	50036339	50037443	SOX4	chr1	50036616	50036625
MKL1	repression_index_4	chr1	50036339	50037443	SOX3	chr1	50036617	50036626
MKL1	repression_index_4	chr1	50036339	50037443	KLF5	chr1	50036677	50036686
MKL1	repression_index_4	chr1	50036339	50037443	ELF1	chr1	50036765	50036778
MKL1	repression_index_4	chr1	50036339	50037443	ETV1	chr1	50036765	50036778
MKL1	repression_index_4	chr1	50036339	50037443	ETV5	chr1	50036766	50036776
MKL1	repression_index_4	chr1	50036339	50037443	ETV4	chr1	50036767	50036776
MKL1	repression_index_4	chr1	50036339	50037443	TFAP2A	chr1	50036827	50036840
MKL1	repression_index_4	chr1	50036339	50037443	TFAP2C	chr1	50036827	50036838
MKL1	repression_index_4	chr1	50036339	50037443	TFAP2C	chr1	50036827	50036840
MKL1	repression_index_4	chr1	50036339	50037443	TFAP2A	chr1	50036827	50036838
MKL1	repression_index_4	chr1	50036339	50037443	LHX5	chr1	50036924	50036931
MKL1	repression_index_4	chr1	50036339	50037443	GRHL2	chr1	50037021	50037032
MKL1	repression_index_4	chr1	50036339	50037443	GRHL3	chr1	50037021	50037032
MKL1	repression_index_4	chr1	50036339	50037443	BACH1	chr1	50037247	50037259
MKL1	repression_index_4	chr1	50036339	50037443	KLF5	chr1	50037331	50037340
MKL1	repression_index_4	chr1	50036339	50037443	CDX2	chr1	50037391	50037402
MKL1	repression_index_4	chr1	50047596	50048889	TCF12	chr1	50047609	50047619
MKL1	repression_index_4	chr1	50047596	50048889	TCF12	chr1	50047610	50047620
MKL1	repression_index_4	chr1	50047596	50048889	TFAP2A	chr1	50047667	50047680
MKL1	repression_index_4	chr1	50047596	50048889	TFAP2C	chr1	50047667	50047680
MKL1	repression_index_4	chr1	50047596	50048889	TFAP2A	chr1	50047668	50047679
MKL1	repression_index_4	chr1	50047596	50048889	TFAP2C	chr1	50047668	50047679
MKL1	repression_index_4	chr1	50047596	50048889	ELF1	chr1	50047730	50047743
MKL1	repression_index_4	chr1	50047596	50048889	ETV4	chr1	50047732	50047741
MKL1	repression_index_4	chr1	50047596	50048889	TCF12	chr1	50047740	50047750
MKL1	repression_index_4	chr1	50047596	50048889	SNAI1	chr1	50047741	50047750
MKL1	repression_index_4	chr1	50047596	50048889	ETV1	chr1	50047875	50047888
MKL1	repression_index_4	chr1	50047596	50048889	ELF1	chr1	50047875	50047888
MKL1	repression_index_4	chr1	50047596	50048889	BACH1	chr1	50047969	50047981
MKL1	repression_index_4	chr1	50047596	50048889	TCF12	chr1	50047996	50048006
MKL1	repression_index_4	chr1	50047596	50048889	SNAI1	chr1	50047997	50048006
MKL1	repression_index_4	chr1	50047596	50048889	MEIS2	chr1	50048241	50048248
MKL1	repression_index_4	chr1	50047596	50048889	ZIC2	chr1	50048422	50048435
MKL1	repression_index_4	chr1	50047596	50048889	RREB1	chr1	50048641	50048660
MKL1	repression_index_4	chr1	50047596	50048889	TFAP2A	chr1	50048768	50048781
MKL1	repression_index_4	chr1	50047596	50048889	TFAP2C	chr1	50048768	50048781
MKL1	repression_index_4	chr1	50057318	50057695	TFAP2A	chr1	50057602	50057613
MKL1	repression_index_4	chr1	50057318	50057695	TFAP2C	chr1	50057602	50057613
MKL1	repression_index_4	chr1	50057318	50057695	MEIS2	chr1	50057648	50057662
MKL1	repression_index_4	chr1	50057995	50058291	ETV1	chr1	50058030	50058043
MKL1	repression_index_4	chr1	50057995	50058291	TBX3	chr1	50058150	50058159
MKL1	repression_index_4	chr1	50057995	50058291	SOX3	chr1	50058238	50058247
HIPK2	repression_index_4	chr1	56078822	56080287	ETV1	chr1	56078886	56078899
HIPK2	repression_index_4	chr1	56078822	56080287	ELF1	chr1	56078886	56078899
HIPK2	repression_index_4	chr1	56078822	56080287	ETV4	chr1	56078888	56078897
HIPK2	repression_index_4	chr1	56078822	56080287	ETS2	chr1	56078889	56078898
HIPK2	repression_index_4	chr1	56078822	56080287	ETV1	chr1	56078971	56078984
HIPK2	repression_index_4	chr1	56078822	56080287	ELF1	chr1	56078971	56078984
HIPK2	repression_index_4	chr1	56078822	56080287	ETS2	chr1	56078972	56078981
HIPK2	repression_index_4	chr1	56078822	56080287	ETV4	chr1	56078973	56078982
HIPK2	repression_index_4	chr1	56078822	56080287	GRHL2	chr1	56079055	56079066
HIPK2	repression_index_4	chr1	56078822	56080287	KLF5	chr1	56079121	56079130
HIPK2	repression_index_4	chr1	56078822	56080287	ZIC2	chr1	56079180	56079193
HIPK2	repression_index_4	chr1	56078822	56080287	TCF12	chr1	56079188	56079198
HIPK2	repression_index_4	chr1	56078822	56080287	TCF12	chr1	56079189	56079199
HIPK2	repression_index_4	chr1	56078822	56080287	SNAI1	chr1	56079189	56079198
HIPK2	repression_index_4	chr1	56078822	56080287	TFAP2A	chr1	56079263	56079276
HIPK2	repression_index_4	chr1	56078822	56080287	TCF12	chr1	56079285	56079295
HIPK2	repression_index_4	chr1	56078822	56080287	ETV1	chr1	56079290	56079303
HIPK2	repression_index_4	chr1	56078822	56080287	ELF1	chr1	56079290	56079303
HIPK2	repression_index_4	chr1	56078822	56080287	ETV4	chr1	56079292	56079301
HIPK2	repression_index_4	chr1	56078822	56080287	ETV5	chr1	56079292	56079302
HIPK2	repression_index_4	chr1	56078822	56080287	ETV1	chr1	56079550	56079563
HIPK2	repression_index_4	chr1	56078822	56080287	ELF1	chr1	56079550	56079563
HIPK2	repression_index_4	chr1	56078822	56080287	TCF12	chr1	56079625	56079635
HIPK2	repression_index_4	chr1	56078822	56080287	MEIS2	chr1	56079663	56079670
HIPK2	repression_index_4	chr1	56078822	56080287	TCF12	chr1	56079811	56079821
HIPK2	repression_index_4	chr1	56078822	56080287	BACH1	chr1	56079877	56079889
HIPK2	repression_index_4	chr1	56078822	56080287	TCF12	chr1	56080068	56080078
HIPK2	repression_index_4	chr1	56078822	56080287	TCF12	chr1	56080069	56080079
HIPK2	repression_index_4	chr1	56078822	56080287	SNAI1	chr1	56080069	56080078
HIPK2	repression_index_4	chr1	56078822	56080287	HIF1A	chr1	56080078	56080087
HIPK2	repression_index_4	chr1	56078822	56080287	SOX3	chr1	56080160	56080169
HIPK2	repression_index_4	chr1	56078822	56080287	TCF12	chr1	56080253	56080263
HIPK2	repression_index_4	chr1	56078822	56080287	SNAI1	chr1	56080254	56080263
HIPK2	repression_index_4	chr1	56078822	56080287	TCF12	chr1	56080254	56080264
HIPK2	activation	chr1	56088954	56090195	ZIC3	chr1	56088981	56088995
HIPK2	activation	chr1	56088954	56090195	ZIC2	chr1	56088983	56088996
HIPK2	activation	chr1	56088954	56090195	NFKB2	chr1	56089056	56089068
HIPK2	activation	chr1	56088954	56090195	MEIS2	chr1	56089457	56089464
HIPK2	activation	chr1	56088954	56090195	MYC	chr1	56089585	56089596
HIPK2	activation	chr1	56088954	56090195	ZIC2	chr1	56089587	56089600
HIPK2	activation	chr1	56088954	56090195	MEIS2	chr1	56089649	56089656
HIPK2	activation	chr1	56088954	56090195	KLF5	chr1	56089696	56089705
HIPK2	activation	chr1	56088954	56090195	SOX4	chr1	56089759	56089768
HIPK2	activation	chr1	56088954	56090195	TFAP2A	chr1	56089774	56089786
HIPK2	activation	chr1	56088954	56090195	TFAP2C	chr1	56089774	56089786
HIPK2	activation	chr1	56088954	56090195	TFAP2A	chr1	56089775	56089788
HIPK2	activation	chr1	56088954	56090195	TFAP2C	chr1	56089775	56089786
HIPK2	activation	chr1	56088954	56090195	TFAP2A	chr1	56089775	56089786
HIPK2	activation	chr1	56088954	56090195	TFAP2C	chr1	56089775	56089788
HIPK2	activation	chr1	56088954	56090195	KLF5	chr1	56089818	56089827
HIPK2	activation	chr1	56088954	56090195	ZIC2	chr1	56089935	56089948
HIPK2	activation	chr1	56088954	56090195	ETV1	chr1	56089975	56089988
HIPK2	activation	chr1	56088954	56090195	ETV4	chr1	56089977	56089986
HIPK2	activation	chr1	56088954	56090195	ETS2	chr1	56089978	56089987
HIPK2	activation	chr1	56088954	56090195	MEIS2	chr1	56089982	56089989
HIPK2	activation	chr1	56088954	56090195	EOMES	chr1	56090042	56090054
HIPK2	activation	chr1	56088954	56090195	TBX3	chr1	56090042	56090051
HIPK2	activation	chr1	56088954	56090195	MGA	chr1	56090043	56090050
HIPK2	activation	chr1	56088954	56090195	KLF5	chr1	56090053	56090062
HIPK2	activation	chr1	56088954	56090195	ELF1	chr1	56090062	56090075
HIPK2	activation	chr1	56088954	56090195	ETV1	chr1	56090062	56090075
HIPK2	activation	chr1	56088954	56090195	ETV4	chr1	56090064	56090073
HIPK2	activation	chr1	56088954	56090195	ETV5	chr1	56090064	56090074
HIPK2	activation	chr1	56088954	56090195	TBX3	chr1	56090101	56090110
HIPK2	activation	chr1	56088954	56090195	MGA	chr1	56090102	56090109
HIPK2	activation	chr1	56088954	56090195	ZIC2	chr1	56090133	56090146
HIPK2	repression_index_4	chr1	56091900	56093723	MEIS2	chr1	56092029	56092036
HIPK2	repression_index_4	chr1	56091900	56093723	TFAP2C	chr1	56092055	56092068
HIPK2	repression_index_4	chr1	56091900	56093723	TFAP2A	chr1	56092055	56092068
HIPK2	repression_index_4	chr1	56091900	56093723	ZIC2	chr1	56092111	56092124
HIPK2	repression_index_4	chr1	56091900	56093723	EOMES	chr1	56092213	56092225
HIPK2	repression_index_4	chr1	56091900	56093723	TBX3	chr1	56092213	56092222
HIPK2	repression_index_4	chr1	56091900	56093723	MGA	chr1	56092214	56092221
HIPK2	repression_index_4	chr1	56091900	56093723	TCF7L1	chr1	56092270	56092281
HIPK2	repression_index_4	chr1	56091900	56093723	ZIC2	chr1	56092283	56092296
HIPK2	repression_index_4	chr1	56091900	56093723	BACH1	chr1	56092287	56092299
HIPK2	repression_index_4	chr1	56091900	56093723	ELF1	chr1	56092593	56092606
HIPK2	repression_index_4	chr1	56091900	56093723	ETV1	chr1	56092593	56092606
HIPK2	repression_index_4	chr1	56091900	56093723	ETV4	chr1	56092595	56092604
HIPK2	repression_index_4	chr1	56091900	56093723	OTX2	chr1	56092645	56092656
HIPK2	repression_index_4	chr1	56091900	56093723	PITX2	chr1	56092647	56092654
HIPK2	repression_index_4	chr1	56091900	56093723	RREB1	chr1	56092801	56092820
HIPK2	repression_index_4	chr1	56091900	56093723	RREB1	chr1	56092805	56092824
HIPK2	repression_index_4	chr1	56091900	56093723	MEIS2	chr1	56092847	56092854
HIPK2	repression_index_4	chr1	56091900	56093723	TFAP2C	chr1	56092943	56092954
HIPK2	repression_index_4	chr1	56091900	56093723	TFAP2A	chr1	56092943	56092954
HIPK2	repression_index_4	chr1	56091900	56093723	ESRRG	chr1	56092946	56092955
HIPK2	repression_index_4	chr1	56091900	56093723	TFAP2A	chr1	56092960	56092973
HIPK2	repression_index_4	chr1	56091900	56093723	TFAP2C	chr1	56092961	56092973
HIPK2	repression_index_4	chr1	56091900	56093723	TFAP2A	chr1	56092961	56092973
HIPK2	repression_index_4	chr1	56091900	56093723	TFAP2A	chr1	56092961	56092974
HIPK2	repression_index_4	chr1	56091900	56093723	TFAP2C	chr1	56092961	56092974
HIPK2	repression_index_4	chr1	56091900	56093723	TFAP2A	chr1	56092962	56092973
HIPK2	repression_index_4	chr1	56091900	56093723	TFAP2C	chr1	56092962	56092973
HIPK2	repression_index_4	chr1	56091900	56093723	MEIS2	chr1	56093016	56093023
HIPK2	repression_index_4	chr1	56091900	56093723	HIC2	chr1	56093130	56093138
HIPK2	repression_index_4	chr1	56091900	56093723	ETV4	chr1	56093148	56093157
HIPK2	repression_index_4	chr1	56091900	56093723	BACH1	chr1	56093235	56093247
HIPK2	repression_index_4	chr1	56091900	56093723	MAFA	chr1	56093267	56093281
HIPK2	repression_index_4	chr1	56091900	56093723	BACH1	chr1	56093267	56093279
HIPK2	repression_index_4	chr1	56091900	56093723	TFAP2C	chr1	56093326	56093337
HIPK2	repression_index_4	chr1	56091900	56093723	ZIC2	chr1	56093343	56093356
HIPK2	repression_index_4	chr1	56091900	56093723	TFAP2A	chr1	56093540	56093551
HIPK2	repression_index_4	chr1	56091900	56093723	TFAP2C	chr1	56093540	56093551
HIPK2	repression_index_4	chr1	56091900	56093723	OTX2	chr1	56093651	56093662
HIPK2	repression_index_4	chr1	56091900	56093723	PITX2	chr1	56093653	56093660
HIPK2	repression_index_4	chr1	56091900	56093723	BACH1	chr1	56093705	56093717
HIPK2	activation	chr1	56134768	56135636	TFAP2A	chr1	56134791	56134804
HIPK2	activation	chr1	56134768	56135636	TFAP2C	chr1	56134791	56134804
HIPK2	activation	chr1	56134768	56135636	TFAP2C	chr1	56134792	56134805
HIPK2	activation	chr1	56134768	56135636	TFAP2A	chr1	56134792	56134805
HIPK2	activation	chr1	56134768	56135636	TFAP2A	chr1	56134793	56134804
HIPK2	activation	chr1	56134768	56135636	TFAP2A	chr1	56135054	56135065
HIPK2	activation	chr1	56134768	56135636	TFAP2C	chr1	56135054	56135065
HIPK2	activation	chr1	56134768	56135636	TCF12	chr1	56135102	56135112
HIPK2	activation	chr1	56134768	56135636	ETS2	chr1	56135191	56135200
HIPK2	activation	chr1	56134768	56135636	TFAP2C	chr1	56135208	56135219
HIPK2	activation	chr1	56134768	56135636	TFAP2A	chr1	56135208	56135219
HIPK2	activation	chr1	56134768	56135636	TFAP2A	chr1	56135208	56135221
HIPK2	activation	chr1	56134768	56135636	TFAP2C	chr1	56135208	56135221
HIPK2	activation	chr1	56134768	56135636	ETV1	chr1	56135215	56135228
HIPK2	activation	chr1	56134768	56135636	ETV4	chr1	56135217	56135226
HIPK2	activation	chr1	56134768	56135636	ZIC2	chr1	56135232	56135245
HIPK2	activation	chr1	56134768	56135636	SNAI1	chr1	56135268	56135277
HIPK2	activation	chr1	56134768	56135636	MYC	chr1	56135308	56135319
HIPK2	activation	chr1	56134768	56135636	HES1	chr1	56135309	56135318
HIPK2	activation	chr1	56134768	56135636	TCF7L1	chr1	56135362	56135373
HIPK2	activation	chr1	56134768	56135636	ELF1	chr1	56135406	56135419
HIPK2	activation	chr1	56134768	56135636	ELF1	chr1	56135499	56135512
HIPK2	activation	chr1	56134768	56135636	ETV1	chr1	56135499	56135512
HIPK2	activation	chr1	56148208	56149468	ETV1	chr1	56148232	56148245
HIPK2	activation	chr1	56148208	56149468	ELF1	chr1	56148232	56148245
HIPK2	activation	chr1	56148208	56149468	ETV4	chr1	56148234	56148243
HIPK2	activation	chr1	56148208	56149468	KLF5	chr1	56148520	56148529
HIPK2	activation	chr1	56148208	56149468	TCF12	chr1	56148566	56148576
HIPK2	activation	chr1	56148208	56149468	TCF12	chr1	56148567	56148577
HIPK2	activation	chr1	56148208	56149468	TFAP2A	chr1	56148596	56148607
HIPK2	activation	chr1	56148208	56149468	TFAP2C	chr1	56148596	56148607
HIPK2	activation	chr1	56148208	56149468	MAFA	chr1	56148612	56148626
HIPK2	activation	chr1	56148208	56149468	TFAP2C	chr1	56148672	56148685
HIPK2	activation	chr1	56148208	56149468	MEIS2	chr1	56148869	56148883
HIPK2	activation	chr1	56148208	56149468	LHX5	chr1	56148870	56148877
HIPK2	activation	chr1	56148208	56149468	HES1	chr1	56149008	56149017
HIPK2	activation	chr1	56148208	56149468	SOX4	chr1	56149035	56149044
HIPK2	activation	chr1	56148208	56149468	SOX3	chr1	56149036	56149045
HIPK2	activation	chr1	56148208	56149468	FOXA2	chr1	56149052	56149062
HIPK2	activation	chr1	56148208	56149468	TCF12	chr1	56149109	56149119
HIPK2	activation	chr1	56148208	56149468	SOX13	chr1	56149177	56149187
HIPK2	activation	chr1	56148208	56149468	NANOG	chr1	56149177	56149187
HIPK2	activation	chr1	56148208	56149468	SOX4	chr1	56149178	56149187
HIPK2	activation	chr1	56148208	56149468	HIC2	chr1	56149276	56149284
HIPK2	activation	chr1	56148208	56149468	ZIC2	chr1	56149323	56149336
HIPK2	activation	chr1	56148208	56149468	ZIC2	chr1	56149400	56149413
HIPK2	activation	chr1	56148208	56149468	TCF12	chr1	56149402	56149412
HIPK2	activation	chr1	56148208	56149468	TFAP2A	chr1	56149440	56149453
HIPK2	repression_index_4	chr1	56157636	56158434	SOX13	chr1	56157693	56157703
HIPK2	repression_index_4	chr1	56157636	56158434	NANOG	chr1	56157693	56157703
HIPK2	repression_index_4	chr1	56157636	56158434	MEIS2	chr1	56157757	56157771
HIPK2	repression_index_4	chr1	56157636	56158434	SNAI1	chr1	56157918	56157927
HIPK2	repression_index_4	chr1	56157636	56158434	TFAP2C	chr1	56158049	56158062
HIPK2	repression_index_4	chr1	56157636	56158434	ZIC3	chr1	56158050	56158064
HIPK2	repression_index_4	chr1	56157636	56158434	GATA2	chr1	56158180	56158190
HIPK2	repression_index_4	chr1	56157636	56158434	ZIC2	chr1	56158283	56158296
HIPK2	repression_index_4	chr1	56157636	56158434	ZIC2	chr1	56158331	56158344
HIPK2	repression_index_4	chr1	56157636	56158434	GATA2	chr1	56158347	56158357
HIPK2	repression_index_4	chr1	56157636	56158434	ELF1	chr1	56158398	56158411
HIPK2	activation	chr1	56172268	56173154	SOX4	chr1	56172303	56172312
HIPK2	activation	chr1	56172268	56173154	TCF12	chr1	56172498	56172508
HIPK2	activation	chr1	56172268	56173154	ETV1	chr1	56172666	56172679
HIPK2	activation	chr1	56172268	56173154	ETS2	chr1	56172667	56172676
HIPK2	activation	chr1	56172268	56173154	ETV4	chr1	56172668	56172677
HIPK2	activation	chr1	56172268	56173154	GRHL1	chr1	56172720	56172731
HIPK2	activation	chr1	56172268	56173154	EOMES	chr1	56172781	56172793
HIPK2	activation	chr1	56172268	56173154	SOX4	chr1	56172907	56172916
HIPK2	repression_index_4	chr1	56187428	56188920	FOXA2	chr1	56187909	56187919
HIPK2	repression_index_4	chr1	56187428	56188920	ELF1	chr1	56187915	56187928
HIPK2	repression_index_4	chr1	56187428	56188920	HIF1A	chr1	56187941	56187950
HIPK2	repression_index_4	chr1	56187428	56188920	MEIS2	chr1	56188113	56188120
HIPK2	repression_index_4	chr1	56187428	56188920	OTX2	chr1	56188138	56188149
HIPK2	repression_index_4	chr1	56187428	56188920	PITX2	chr1	56188140	56188147
HIPK2	repression_index_4	chr1	56187428	56188920	KLF5	chr1	56188146	56188155
HIPK2	repression_index_4	chr1	56187428	56188920	BACH1	chr1	56188169	56188181
HIPK2	repression_index_4	chr1	56187428	56188920	ETV1	chr1	56188281	56188294
HIPK2	repression_index_4	chr1	56187428	56188920	GATA2	chr1	56188444	56188454
HIPK2	repression_index_4	chr1	56187428	56188920	HIC2	chr1	56188885	56188893
HIPK2	repression_index_4	chr1	56196405	56198474	ZIC2	chr1	56196446	56196459
HIPK2	repression_index_4	chr1	56196405	56198474	TCF12	chr1	56196447	56196457
HIPK2	repression_index_4	chr1	56196405	56198474	HIC2	chr1	56196803	56196811
HIPK2	repression_index_4	chr1	56196405	56198474	TFAP2C	chr1	56196804	56196815
HIPK2	repression_index_4	chr1	56196405	56198474	TFAP2A	chr1	56196804	56196815
HIPK2	repression_index_4	chr1	56196405	56198474	NFKB2	chr1	56196809	56196821
HIPK2	repression_index_4	chr1	56196405	56198474	TCF7L1	chr1	56196943	56196954
HIPK2	repression_index_4	chr1	56196405	56198474	GRHL3	chr1	56196979	56196990
HIPK2	repression_index_4	chr1	56196405	56198474	GRHL2	chr1	56196979	56196990
HIPK2	repression_index_4	chr1	56196405	56198474	GRHL1	chr1	56196979	56196990
HIPK2	repression_index_4	chr1	56196405	56198474	KLF5	chr1	56197019	56197028
HIPK2	repression_index_4	chr1	56196405	56198474	TBX3	chr1	56197119	56197128
HIPK2	repression_index_4	chr1	56196405	56198474	MEIS2	chr1	56197148	56197155
HIPK2	repression_index_4	chr1	56196405	56198474	ELF1	chr1	56197217	56197230
HIPK2	repression_index_4	chr1	56196405	56198474	ETV1	chr1	56197217	56197230
HIPK2	repression_index_4	chr1	56196405	56198474	ETV4	chr1	56197219	56197228
HIPK2	repression_index_4	chr1	56196405	56198474	SOX3	chr1	56197323	56197332
HIPK2	repression_index_4	chr1	56196405	56198474	TCF12	chr1	56197438	56197448
HIPK2	repression_index_4	chr1	56196405	56198474	SNAI1	chr1	56197438	56197447
HIPK2	repression_index_4	chr1	56196405	56198474	TCF7L1	chr1	56197517	56197528
HIPK2	repression_index_4	chr1	56196405	56198474	SOX4	chr1	56197629	56197638
HIPK2	repression_index_4	chr1	56196405	56198474	MAFA	chr1	56197712	56197726
HIPK2	repression_index_4	chr1	56196405	56198474	ZIC2	chr1	56197717	56197730
HIPK2	repression_index_4	chr1	56196405	56198474	ZIC2	chr1	56197734	56197747
HIPK2	repression_index_4	chr1	56196405	56198474	SOX13	chr1	56197766	56197776
HIPK2	repression_index_4	chr1	56196405	56198474	NANOG	chr1	56197766	56197776
HIPK2	repression_index_4	chr1	56196405	56198474	KLF5	chr1	56197810	56197819
HIPK2	repression_index_4	chr1	56196405	56198474	TFAP2A	chr1	56197919	56197932
HIPK2	repression_index_4	chr1	56196405	56198474	TFAP2A	chr1	56197920	56197931
HIPK2	repression_index_4	chr1	56196405	56198474	TFAP2C	chr1	56197920	56197931
HIPK2	repression_index_4	chr1	56196405	56198474	GRHL3	chr1	56197965	56197976
HIPK2	repression_index_4	chr1	56196405	56198474	GRHL2	chr1	56197965	56197976
HIPK2	repression_index_4	chr1	56196405	56198474	TCF12	chr1	56198150	56198160
HIPK2	repression_index_4	chr1	56196405	56198474	SNAI1	chr1	56198150	56198159
HIPK2	repression_index_4	chr1	56196405	56198474	TCF12	chr1	56198222	56198232
HIPK2	repression_index_4	chr1	56196405	56198474	ESRRG	chr1	56198438	56198447
HIPK2	activation	chr1	56202094	56202982	MYC	chr1	56202199	56202210
HIPK2	activation	chr1	56202094	56202982	MYCN	chr1	56202199	56202210
HIPK2	activation	chr1	56202094	56202982	HEY1	chr1	56202200	56202209
HIPK2	activation	chr1	56202094	56202982	KLF5	chr1	56202285	56202294
HIPK2	activation	chr1	56202094	56202982	KLF5	chr1	56202401	56202410
HIPK2	activation	chr1	56202094	56202982	TBX3	chr1	56202409	56202418
HIPK2	activation	chr1	56202094	56202982	MGA	chr1	56202410	56202417
HIPK2	activation	chr1	56202094	56202982	RREB1	chr1	56202582	56202601
HIPK2	activation	chr1	56202094	56202982	TBX3	chr1	56202666	56202675
HIPK2	activation	chr1	56202094	56202982	EOMES	chr1	56202666	56202678
HIPK2	activation	chr1	56202094	56202982	MGA	chr1	56202667	56202674
HIPK2	activation	chr1	56202094	56202982	ZIC2	chr1	56202800	56202813
HIPK2	activation	chr1	56202094	56202982	KLF5	chr1	56202827	56202836
HIPK2	activation	chr1	56202094	56202982	ZIC2	chr1	56202940	56202953
HIPK2	repression_index_4	chr1	56211550	56212095	FOXA2	chr1	56211589	56211599
HIPK2	repression_index_4	chr1	56211550	56212095	MEIS2	chr1	56211667	56211674
HIPK2	repression_index_4	chr1	56211550	56212095	CDX2	chr1	56211678	56211689
HIPK2	repression_index_4	chr1	56211550	56212095	ESRRG	chr1	56211710	56211719
HIPK2	repression_index_4	chr1	56211550	56212095	KLF5	chr1	56211869	56211878
HIPK2	repression_index_4	chr1	56211550	56212095	TFAP2A	chr1	56211997	56212010
HIPK2	repression_index_4	chr1	56211550	56212095	TFAP2C	chr1	56211997	56212010
HIPK2	repression_index_4	chr1	56211550	56212095	NFKB2	chr1	56212070	56212082
TRIM24	activation	chr1	56401936	56403121	LHX5	chr1	56401984	56401991
TRIM24	activation	chr1	56401936	56403121	MAFA	chr1	56402080	56402094
TRIM24	activation	chr1	56401936	56403121	BACH1	chr1	56402080	56402092
TRIM24	activation	chr1	56401936	56403121	BACH1	chr1	56402082	56402094
TRIM24	activation	chr1	56401936	56403121	ETV1	chr1	56402142	56402155
TRIM24	activation	chr1	56401936	56403121	ETV4	chr1	56402144	56402153
TRIM24	activation	chr1	56401936	56403121	TCF7L1	chr1	56402336	56402347
TRIM24	activation	chr1	56401936	56403121	ESRRG	chr1	56402405	56402414
TRIM24	activation	chr1	56401936	56403121	SOX4	chr1	56402502	56402511
TRIM24	activation	chr1	56401936	56403121	TCF12	chr1	56402562	56402572
TRIM24	activation	chr1	56401936	56403121	MEIS2	chr1	56402898	56402905
TRIM24	activation	chr1	56414075	56414939	TCF12	chr1	56414117	56414127
TRIM24	activation	chr1	56414075	56414939	TCF12	chr1	56414118	56414128
TRIM24	activation	chr1	56414075	56414939	KLF5	chr1	56414192	56414201
TRIM24	activation	chr1	56414075	56414939	KLF5	chr1	56414335	56414344
TRIM24	activation	chr1	56414075	56414939	DLX5	chr1	56414386	56414393
TRIM24	activation	chr1	56414075	56414939	MSX1	chr1	56414386	56414393
TRIM24	repression_index_4	chr1	56467612	56469339	EOMES	chr1	56467621	56467633
TRIM24	repression_index_4	chr1	56467612	56469339	MEIS2	chr1	56467828	56467835
TRIM24	repression_index_4	chr1	56467612	56469339	LHX5	chr1	56468245	56468252
TRIM24	repression_index_4	chr1	56467612	56469339	ETV1	chr1	56468308	56468321
TRIM24	repression_index_4	chr1	56467612	56469339	ETV4	chr1	56468310	56468319
TRIM24	repression_index_4	chr1	56467612	56469339	GATA2	chr1	56468720	56468730
TRIM24	repression_index_4	chr1	56467612	56469339	CDX2	chr1	56468775	56468786
TRIM24	repression_index_4	chr1	56467612	56469339	SOX3	chr1	56468802	56468811
TRIM24	repression_index_4	chr1	56467612	56469339	GBX2	chr1	56468826	56468835
TRIM24	repression_index_4	chr1	56467612	56469339	MSX1	chr1	56468827	56468834
TRIM24	repression_index_4	chr1	56467612	56469339	ETV1	chr1	56468941	56468954
TRIM24	repression_index_4	chr1	56467612	56469339	ELF1	chr1	56468941	56468954
TRIM24	repression_index_4	chr1	56467612	56469339	ETV4	chr1	56468943	56468952
TRIM24	repression_index_4	chr1	56467612	56469339	TCF7L1	chr1	56469018	56469029
TRIM24	repression_index_4	chr1	56467612	56469339	TBX3	chr1	56469072	56469081
TRIM24	repression_index_4	chr1	56467612	56469339	EOMES	chr1	56469072	56469084
TRIM24	repression_index_4	chr1	56467612	56469339	MGA	chr1	56469073	56469080
TRIM24	repression_index_4	chr1	56467612	56469339	MEIS2	chr1	56469202	56469209
TRIM24	repression_index_4	chr1	56509703	56512830	TCF7L1	chr1	56510038	56510049
TRIM24	repression_index_4	chr1	56509703	56512830	KLF5	chr1	56510052	56510061
TRIM24	repression_index_4	chr1	56509703	56512830	SOX4	chr1	56510241	56510250
TRIM24	repression_index_4	chr1	56509703	56512830	SOX3	chr1	56510242	56510251
TRIM24	repression_index_4	chr1	56509703	56512830	TFAP2A	chr1	56510326	56510337
TRIM24	repression_index_4	chr1	56509703	56512830	TFAP2C	chr1	56510326	56510337
TRIM24	repression_index_4	chr1	56509703	56512830	GATA2	chr1	56510410	56510420
TRIM24	repression_index_4	chr1	56509703	56512830	SOX13	chr1	56510433	56510443
TRIM24	repression_index_4	chr1	56509703	56512830	NANOG	chr1	56510433	56510443
TRIM24	repression_index_4	chr1	56509703	56512830	SOX4	chr1	56510434	56510443
TRIM24	repression_index_4	chr1	56509703	56512830	GATA2	chr1	56510522	56510532
TRIM24	repression_index_4	chr1	56509703	56512830	MAFA	chr1	56510668	56510682
TRIM24	repression_index_4	chr1	56509703	56512830	CDX2	chr1	56510741	56510752
TRIM24	repression_index_4	chr1	56509703	56512830	MEIS2	chr1	56510839	56510846
TRIM24	repression_index_4	chr1	56509703	56512830	GRHL2	chr1	56510903	56510914
TRIM24	repression_index_4	chr1	56509703	56512830	KLF5	chr1	56511060	56511069
TRIM24	repression_index_4	chr1	56509703	56512830	ETV1	chr1	56511732	56511745
TRIM24	repression_index_4	chr1	56509703	56512830	ETV4	chr1	56511734	56511743
TRIM24	repression_index_4	chr1	56509703	56512830	TFAP2A	chr1	56511875	56511888
TRIM24	repression_index_4	chr1	56509703	56512830	TFAP2A	chr1	56511876	56511889
TRIM24	repression_index_4	chr1	56509703	56512830	TFAP2C	chr1	56511876	56511889
TRIM24	repression_index_4	chr1	56509703	56512830	GATA2	chr1	56512071	56512081
TRIM24	repression_index_4	chr1	56509703	56512830	CDX2	chr1	56512188	56512199
TRIM24	repression_index_4	chr1	56509703	56512830	ZIC2	chr1	56512376	56512389
TRIM24	repression_index_4	chr1	56509703	56512830	SOX3	chr1	56512552	56512561
TRIM24	repression_index_4	chr1	56509703	56512830	SOX4	chr1	56512553	56512562
TRIM24	repression_index_4	chr1	56509703	56512830	GBX2	chr1	56512559	56512568
TRIM24	repression_index_4	chr1	56509703	56512830	DLX5	chr1	56512560	56512567
TRIM24	repression_index_4	chr1	56509703	56512830	MSX1	chr1	56512560	56512567
TRIM24	repression_index_4	chr1	56509703	56512830	ETV4	chr1	56512728	56512737
TRIM24	repression_index_4	chr1	56520947	56525165	MEIS2	chr1	56521011	56521025
TRIM24	repression_index_4	chr1	56520947	56525165	MEIS2	chr1	56521115	56521129
TRIM24	repression_index_4	chr1	56520947	56525165	SOX13	chr1	56521781	56521791
TRIM24	repression_index_4	chr1	56520947	56525165	BACH1	chr1	56521868	56521880
TRIM24	repression_index_4	chr1	56520947	56525165	MAFA	chr1	56521868	56521882
TRIM24	repression_index_4	chr1	56520947	56525165	BACH1	chr1	56521996	56522008
TRIM24	repression_index_4	chr1	56520947	56525165	BACH1	chr1	56521998	56522010
TRIM24	repression_index_4	chr1	56520947	56525165	MEIS2	chr1	56522015	56522029
TRIM24	repression_index_4	chr1	56520947	56525165	SOX4	chr1	56522102	56522111
TRIM24	repression_index_4	chr1	56520947	56525165	ATF3	chr1	56522219	56522230
TRIM24	repression_index_4	chr1	56520947	56525165	GATA2	chr1	56522516	56522526
TRIM24	repression_index_4	chr1	56520947	56525165	GRHL3	chr1	56522527	56522538
TRIM24	repression_index_4	chr1	56520947	56525165	GRHL1	chr1	56522527	56522538
TRIM24	repression_index_4	chr1	56520947	56525165	GATA2	chr1	56522588	56522598
TRIM24	repression_index_4	chr1	56520947	56525165	GRHL2	chr1	56522814	56522825
TRIM24	repression_index_4	chr1	56520947	56525165	SOX13	chr1	56522872	56522882
TRIM24	repression_index_4	chr1	56520947	56525165	NANOG	chr1	56522872	56522882
TRIM24	repression_index_4	chr1	56520947	56525165	GATA2	chr1	56523089	56523099
TRIM24	repression_index_4	chr1	56520947	56525165	ETV4	chr1	56523349	56523358
TRIM24	repression_index_4	chr1	56520947	56525165	CDX2	chr1	56523471	56523482
TRIM24	repression_index_4	chr1	56520947	56525165	ESRRG	chr1	56523494	56523503
TRIM24	repression_index_4	chr1	56520947	56525165	GATA2	chr1	56523581	56523591
TRIM24	repression_index_4	chr1	56520947	56525165	ZIC2	chr1	56523609	56523622
TRIM24	repression_index_4	chr1	56520947	56525165	MEIS2	chr1	56523660	56523674
TRIM24	repression_index_4	chr1	56520947	56525165	MAFA	chr1	56523855	56523869
TRIM24	repression_index_4	chr1	56520947	56525165	MEIS2	chr1	56523936	56523950
TRIM24	repression_index_4	chr1	56520947	56525165	TFAP2C	chr1	56524068	56524081
TRIM24	repression_index_4	chr1	56520947	56525165	TFAP2A	chr1	56524068	56524081
TRIM24	repression_index_4	chr1	56520947	56525165	ZIC2	chr1	56524237	56524250
TRIM24	repression_index_4	chr1	56520947	56525165	ELF1	chr1	56524290	56524303
TRIM24	repression_index_4	chr1	56520947	56525165	ETV5	chr1	56524291	56524301
TRIM24	repression_index_4	chr1	56520947	56525165	SOX4	chr1	56524337	56524346
TRIM24	repression_index_4	chr1	56520947	56525165	ETV4	chr1	56524453	56524462
TRIM24	repression_index_4	chr1	56520947	56525165	TFAP2C	chr1	56524504	56524517
TRIM24	repression_index_4	chr1	56520947	56525165	TFAP2A	chr1	56524504	56524517
TRIM24	repression_index_4	chr1	56520947	56525165	ETS2	chr1	56524539	56524548
TRIM24	repression_index_4	chr1	56520947	56525165	ETV4	chr1	56524563	56524572
TRIM24	repression_index_4	chr1	56520947	56525165	TCF12	chr1	56524840	56524850
TRIM24	repression_index_4	chr1	56520947	56525165	TCF7L1	chr1	56524858	56524869
TRIM24	repression_index_4	chr1	56520947	56525165	HIC2	chr1	56524896	56524904
TRIM24	repression_index_4	chr1	56520947	56525165	GATA2	chr1	56524948	56524958
TRIM24	repression_index_4	chr1	56520947	56525165	ETV4	chr1	56524964	56524973
TRIM24	repression_index_4	chr1	56520947	56525165	HIC2	chr1	56525100	56525108
TRIM24	repression_index_4	chr1	56520947	56525165	SOX3	chr1	56525112	56525121
TRIM24	repression_index_4	chr1	56559374	56559761	CDX2	chr1	56559471	56559482
TRIM24	repression_index_4	chr1	56559374	56559761	SOX4	chr1	56559704	56559713
TRIM24	repression_index_4	chr1	56559374	56559761	ELF1	chr1	56559744	56559757
TRIM24	activation	chr1	56583741	56584733	ESRRG	chr1	56583980	56583989
TRIM24	activation	chr1	56583741	56584733	TCF12	chr1	56584025	56584035
TRIM24	activation	chr1	56583741	56584733	HIC2	chr1	56584216	56584224
TRIM24	activation	chr1	56583741	56584733	TFAP2C	chr1	56584218	56584231
TRIM24	activation	chr1	56583741	56584733	TFAP2A	chr1	56584219	56584230
TRIM24	activation	chr1	56583741	56584733	TFAP2A	chr1	56584219	56584232
TRIM24	activation	chr1	56583741	56584733	TFAP2C	chr1	56584273	56584285
TRIM24	activation	chr1	56583741	56584733	TFAP2A	chr1	56584273	56584285
TRIM24	activation	chr1	56583741	56584733	SOX13	chr1	56584327	56584337
TRIM24	activation	chr1	56583741	56584733	SOX3	chr1	56584345	56584354
TRIM24	activation	chr1	56583741	56584733	SOX4	chr1	56584498	56584507
TRIM24	activation	chr1	56583741	56584733	ESRRG	chr1	56584673	56584682
TRIM24	activation	chr1	56583741	56584733	ETV4	chr1	56584723	56584732
TRIM24	repression_index_4	chr1	56588586	56590516	SNAI1	chr1	56588595	56588604
TRIM24	repression_index_4	chr1	56588586	56590516	TCF12	chr1	56588678	56588688
TRIM24	repression_index_4	chr1	56588586	56590516	MEIS2	chr1	56588707	56588714
TRIM24	repression_index_4	chr1	56588586	56590516	KLF5	chr1	56588770	56588779
TRIM24	repression_index_4	chr1	56588586	56590516	ETV4	chr1	56588797	56588806
TRIM24	repression_index_4	chr1	56588586	56590516	OTX2	chr1	56588883	56588894
TRIM24	repression_index_4	chr1	56588586	56590516	PITX2	chr1	56588885	56588892
TRIM24	repression_index_4	chr1	56588586	56590516	HIC2	chr1	56588982	56588990
TRIM24	repression_index_4	chr1	56588586	56590516	TFAP2A	chr1	56588983	56588995
TRIM24	repression_index_4	chr1	56588586	56590516	TFAP2C	chr1	56588983	56588995
TRIM24	repression_index_4	chr1	56588586	56590516	TFAP2A	chr1	56588983	56588994
TRIM24	repression_index_4	chr1	56588586	56590516	TFAP2C	chr1	56588983	56588994
TRIM24	repression_index_4	chr1	56588586	56590516	TFAP2A	chr1	56588984	56588996
TRIM24	repression_index_4	chr1	56588586	56590516	TCF12	chr1	56589015	56589025
TRIM24	repression_index_4	chr1	56588586	56590516	TCF12	chr1	56589016	56589026
TRIM24	repression_index_4	chr1	56588586	56590516	ZIC2	chr1	56589071	56589084
TRIM24	repression_index_4	chr1	56588586	56590516	HIF1A	chr1	56589098	56589107
TRIM24	repression_index_4	chr1	56588586	56590516	ETV1	chr1	56589169	56589182
TRIM24	repression_index_4	chr1	56588586	56590516	ETV4	chr1	56589171	56589180
TRIM24	repression_index_4	chr1	56588586	56590516	ETS2	chr1	56589172	56589181
TRIM24	repression_index_4	chr1	56588586	56590516	HIC2	chr1	56589192	56589200
TRIM24	repression_index_4	chr1	56588586	56590516	SNAI1	chr1	56589242	56589251
TRIM24	repression_index_4	chr1	56588586	56590516	TCF12	chr1	56589242	56589252
TRIM24	repression_index_4	chr1	56588586	56590516	CDX2	chr1	56589262	56589273
TRIM24	repression_index_4	chr1	56588586	56590516	GATA2	chr1	56589382	56589392
TRIM24	repression_index_4	chr1	56588586	56590516	RREB1	chr1	56589411	56589430
TRIM24	repression_index_4	chr1	56588586	56590516	TBX3	chr1	56589412	56589421
TRIM24	repression_index_4	chr1	56588586	56590516	HIC2	chr1	56589636	56589644
TRIM24	repression_index_4	chr1	56588586	56590516	ZIC3	chr1	56589641	56589655
TRIM24	repression_index_4	chr1	56588586	56590516	KLF5	chr1	56589763	56589772
TRIM24	repression_index_4	chr1	56588586	56590516	KLF5	chr1	56589998	56590007
TRIM24	repression_index_4	chr1	56588586	56590516	TCF7L1	chr1	56590071	56590082
TRIM24	repression_index_4	chr1	56588586	56590516	EOMES	chr1	56590148	56590160
TRIM24	repression_index_4	chr1	56588586	56590516	NANOG	chr1	56590181	56590191
TRIM24	repression_index_4	chr1	56588586	56590516	TCF12	chr1	56590281	56590291
TRIM24	repression_index_4	chr1	56588586	56590516	SNAI1	chr1	56590282	56590291
TRIM24	repression_index_4	chr1	56588586	56590516	TFAP2A	chr1	56590344	56590357
TRIM24	repression_index_4	chr1	56588586	56590516	TFAP2C	chr1	56590344	56590357
TRIM24	repression_index_4	chr1	56588586	56590516	TFAP2A	chr1	56590345	56590358
TRIM24	repression_index_4	chr1	56588586	56590516	TFAP2C	chr1	56590345	56590358
TRIM24	repression_index_4	chr1	56588586	56590516	TFAP2C	chr1	56590345	56590356
TRIM24	repression_index_4	chr1	56588586	56590516	TFAP2A	chr1	56590345	56590356
TRIM24	repression_index_4	chr1	56588586	56590516	SNAI1	chr1	56590353	56590362
TRIM24	repression_index_4	chr1	56588586	56590516	TCF12	chr1	56590353	56590363
TRIM24	repression_index_4	chr1	56588586	56590516	KLF5	chr1	56590464	56590473
NANOG	repression_index_4	chr1	75880376	75880975	FOXA2	chr1	75880401	75880411
NANOG	repression_index_4	chr1	75880376	75880975	HIC2	chr1	75880537	75880545
NANOG	repression_index_4	chr1	75880376	75880975	SOX13	chr1	75880542	75880552
NANOG	repression_index_4	chr1	75880376	75880975	ETV4	chr1	75880741	75880750
NANOG	repression_index_4	chr1	75880376	75880975	KLF5	chr1	75880799	75880808
NANOG	repression_index_4	chr1	75880376	75880975	MGA	chr1	75880871	75880878
NANOG	repression_index_4	chr1	75880376	75880975	GBX2	chr1	75880881	75880890
NANOG	repression_index_4	chr1	75880376	75880975	LHX5	chr1	75880882	75880889
NANOG	repression_index_4	chr1	75880376	75880975	MEIS2	chr1	75880958	75880965
NANOG	repression_index_4	chr1	75904392	75909361	HIC2	chr1	75904636	75904644
NANOG	repression_index_4	chr1	75904392	75909361	MEIS2	chr1	75904728	75904735
NANOG	repression_index_4	chr1	75904392	75909361	KLF5	chr1	75904895	75904904
NANOG	repression_index_4	chr1	75904392	75909361	TFAP2C	chr1	75904900	75904913
NANOG	repression_index_4	chr1	75904392	75909361	OTX2	chr1	75904967	75904978
NANOG	repression_index_4	chr1	75904392	75909361	EOMES	chr1	75905005	75905017
NANOG	repression_index_4	chr1	75904392	75909361	TBX3	chr1	75905008	75905017
NANOG	repression_index_4	chr1	75904392	75909361	MGA	chr1	75905009	75905016
NANOG	repression_index_4	chr1	75904392	75909361	SNAI1	chr1	75905010	75905019
NANOG	repression_index_4	chr1	75904392	75909361	TCF12	chr1	75905010	75905020
NANOG	repression_index_4	chr1	75904392	75909361	ETV1	chr1	75905058	75905071
NANOG	repression_index_4	chr1	75904392	75909361	ZIC2	chr1	75905071	75905084
NANOG	repression_index_4	chr1	75904392	75909361	ETV4	chr1	75905524	75905533
NANOG	repression_index_4	chr1	75904392	75909361	MEIS2	chr1	75905540	75905554
NANOG	repression_index_4	chr1	75904392	75909361	CDX2	chr1	75905544	75905555
NANOG	repression_index_4	chr1	75904392	75909361	GATA2	chr1	75905675	75905685
NANOG	repression_index_4	chr1	75904392	75909361	TCF12	chr1	75905696	75905706
NANOG	repression_index_4	chr1	75904392	75909361	SOX3	chr1	75905726	75905735
NANOG	repression_index_4	chr1	75904392	75909361	ETV4	chr1	75905851	75905860
NANOG	repression_index_4	chr1	75904392	75909361	SOX4	chr1	75905970	75905979
NANOG	repression_index_4	chr1	75904392	75909361	SOX3	chr1	75905971	75905980
NANOG	repression_index_4	chr1	75904392	75909361	TCF12	chr1	75906100	75906110
NANOG	repression_index_4	chr1	75904392	75909361	SNAI1	chr1	75906101	75906110
NANOG	repression_index_4	chr1	75904392	75909361	TCF12	chr1	75906101	75906111
NANOG	repression_index_4	chr1	75904392	75909361	EOMES	chr1	75906440	75906452
NANOG	repression_index_4	chr1	75904392	75909361	ELF1	chr1	75906514	75906527
NANOG	repression_index_4	chr1	75904392	75909361	ETV4	chr1	75906516	75906525
NANOG	repression_index_4	chr1	75904392	75909361	TCF12	chr1	75906789	75906799
NANOG	repression_index_4	chr1	75904392	75909361	MEIS2	chr1	75906930	75906937
NANOG	repression_index_4	chr1	75904392	75909361	KLF5	chr1	75907446	75907455
NANOG	repression_index_4	chr1	75904392	75909361	GATA2	chr1	75907505	75907515
NANOG	repression_index_4	chr1	75904392	75909361	TCF12	chr1	75907969	75907979
NANOG	repression_index_4	chr1	75904392	75909361	TFAP2A	chr1	75908008	75908021
NANOG	repression_index_4	chr1	75904392	75909361	TFAP2C	chr1	75908008	75908021
NANOG	repression_index_4	chr1	75904392	75909361	ETV4	chr1	75908396	75908405
NANOG	repression_index_4	chr1	75904392	75909361	SOX13	chr1	75908689	75908699
NANOG	repression_index_4	chr1	75904392	75909361	NANOG	chr1	75908738	75908748
NANOG	repression_index_4	chr1	75904392	75909361	SOX13	chr1	75908738	75908748
NANOG	repression_index_4	chr1	75904392	75909361	TCF12	chr1	75908784	75908794
NANOG	repression_index_4	chr1	75904392	75909361	SNAI1	chr1	75908784	75908793
NANOG	repression_index_4	chr1	75904392	75909361	ZNF423	chr1	75908912	75908926
NANOG	repression_index_4	chr1	75904392	75909361	ZNF423	chr1	75908913	75908927
NANOG	repression_index_4	chr1	75904392	75909361	TFAP2A	chr1	75908915	75908927
NANOG	repression_index_4	chr1	75909779	75911873	ZIC2	chr1	75909854	75909867
NANOG	repression_index_4	chr1	75909779	75911873	NFKB2	chr1	75909862	75909874
NANOG	repression_index_4	chr1	75909779	75911873	GRHL2	chr1	75909987	75909998
NANOG	repression_index_4	chr1	75909779	75911873	KLF5	chr1	75910217	75910226
NANOG	repression_index_4	chr1	75909779	75911873	FOXA2	chr1	75910271	75910281
NANOG	repression_index_4	chr1	75909779	75911873	MEIS2	chr1	75910627	75910634
NANOG	repression_index_4	chr1	75909779	75911873	ZIC2	chr1	75910743	75910756
NANOG	repression_index_4	chr1	75909779	75911873	HOXA1	chr1	75911062	75911069
NANOG	repression_index_4	chr1	75909779	75911873	LHX5	chr1	75911062	75911069
NANOG	repression_index_4	chr1	75909779	75911873	EOMES	chr1	75911117	75911129
NANOG	repression_index_4	chr1	75909779	75911873	TBX3	chr1	75911120	75911129
NANOG	repression_index_4	chr1	75909779	75911873	MGA	chr1	75911121	75911128
NANOG	repression_index_4	chr1	75909779	75911873	TCF12	chr1	75911214	75911224
NANOG	repression_index_4	chr1	75909779	75911873	TCF12	chr1	75911215	75911225
NANOG	repression_index_4	chr1	75909779	75911873	MEIS2	chr1	75911219	75911226
NANOG	repression_index_4	chr1	75909779	75911873	FOXA2	chr1	75911310	75911320
NANOG	repression_index_4	chr1	75909779	75911873	ZNF423	chr1	75911329	75911343
NANOG	repression_index_4	chr1	75909779	75911873	SNAI1	chr1	75911626	75911635
NANOG	repression_index_4	chr1	75909779	75911873	GRHL2	chr1	75911773	75911784
NANOG	repression_index_4	chr1	75909779	75911873	ESRRG	chr1	75911790	75911799
NANOG	repression_index_4	chr1	75909779	75911873	TCF7L1	chr1	75911791	75911802
NANOG	repression_index_4	chr1	75909779	75911873	LHX5	chr1	75911850	75911857
NANOG	repression_index_4	chr1	75948785	75949856	KLF5	chr1	75948826	75948835
NANOG	repression_index_4	chr1	75948785	75949856	TBX3	chr1	75948826	75948835
NANOG	repression_index_4	chr1	75948785	75949856	MEIS2	chr1	75948858	75948865
NANOG	repression_index_4	chr1	75948785	75949856	ELF1	chr1	75948927	75948940
NANOG	repression_index_4	chr1	75948785	75949856	ETV1	chr1	75948927	75948940
NANOG	repression_index_4	chr1	75948785	75949856	ETV5	chr1	75948928	75948938
NANOG	repression_index_4	chr1	75948785	75949856	ETV4	chr1	75948929	75948938
NANOG	repression_index_4	chr1	75948785	75949856	TCF12	chr1	75949097	75949107
NANOG	repression_index_4	chr1	75948785	75949856	TCF12	chr1	75949098	75949108
NANOG	repression_index_4	chr1	75948785	75949856	ZIC3	chr1	75949173	75949187
NANOG	repression_index_4	chr1	75948785	75949856	TFAP2A	chr1	75949211	75949223
NANOG	repression_index_4	chr1	75948785	75949856	TFAP2C	chr1	75949211	75949223
NANOG	repression_index_4	chr1	75948785	75949856	TFAP2A	chr1	75949213	75949224
NANOG	repression_index_4	chr1	75948785	75949856	TFAP2C	chr1	75949213	75949224
NANOG	repression_index_4	chr1	75948785	75949856	ESRRG	chr1	75949345	75949354
NANOG	repression_index_4	chr1	75948785	75949856	BACH1	chr1	75949514	75949526
NANOG	repression_index_4	chr1	75948785	75949856	ELF1	chr1	75949727	75949740
NANOG	repression_index_4	chr1	75948785	75949856	ETV1	chr1	75949727	75949740
NANOG	repression_index_4	chr1	75948785	75949856	ETV5	chr1	75949728	75949738
NANOG	repression_index_4	chr1	75948785	75949856	ETV4	chr1	75949729	75949738
NANOG	activation	chr1	75976284	75976488	RREB1	chr1	75976440	75976459
NANOG	activation	chr1	75976284	75976488	SOX3	chr1	75976441	75976450
NANOG	activation	chr1	75976284	75976488	RREB1	chr1	75976445	75976464
NANOG	activation	chr1	75976284	75976488	SOX3	chr1	75976446	75976455
NANOG	activation	chr1	75976284	75976488	RREB1	chr1	75976450	75976469
NANOG	activation	chr1	75976284	75976488	SOX3	chr1	75976451	75976460
NANOG	activation	chr1	75976284	75976488	SOX3	chr1	75976456	75976465
NANOG	activation	chr1	75976284	75976488	SOX3	chr1	75976461	75976470
NANOG	repression_index_4	chr1	75977297	75978130	KLF5	chr1	75977468	75977477
NANOG	repression_index_4	chr1	75977297	75978130	TCF12	chr1	75977508	75977518
NANOG	repression_index_4	chr1	75977297	75978130	GRHL2	chr1	75977669	75977680
NANOG	repression_index_4	chr1	75977297	75978130	CDX2	chr1	75977731	75977742
NANOG	repression_index_4	chr1	75977297	75978130	EOMES	chr1	75977879	75977891
NANOG	repression_index_4	chr1	75977297	75978130	MGA	chr1	75977880	75977887
NRIP1	activation	chr1	98261918	98262156	TCF12	chr1	98261986	98261996
NRIP1	activation	chr1	98261918	98262156	TCF12	chr1	98261987	98261997
NRIP1	activation	chr1	98261918	98262156	SNAI1	chr1	98261987	98261996
NRIP1	activation	chr1	98261918	98262156	ATF3	chr1	98262062	98262073
NRIP1	activation	chr1	98261918	98262156	MYCN	chr1	98262081	98262092
NRIP1	activation	chr1	98261918	98262156	SOX3	chr1	98262091	98262100
NRIP1	activation	chr1	98261918	98262156	SOX13	chr1	98262092	98262102
NRIP1	activation	chr1	98261918	98262156	NANOG	chr1	98262092	98262102
NRIP1	activation	chr1	98261918	98262156	SOX4	chr1	98262092	98262101
BACH1	activation	chr1	104178284	104178532	ZIC2	chr1	104178301	104178314
BACH1	activation	chr1	104178284	104178532	TCF12	chr1	104178303	104178313
BACH1	activation	chr1	104178284	104178532	ZIC2	chr1	104178436	104178449
BACH1	activation	chr1	104178284	104178532	MAFA	chr1	104178463	104178477
BACH1	activation	chr1	104269573	104269882	TFAP2A	chr1	104269590	104269603
BACH1	activation	chr1	104269573	104269882	TFAP2C	chr1	104269592	104269603
BACH1	activation	chr1	104269573	104269882	TFAP2A	chr1	104269592	104269603
BACH1	activation	chr1	104269573	104269882	ESRRG	chr1	104269640	104269649
BACH1	activation	chr1	104269573	104269882	NANOG	chr1	104269647	104269657
BACH1	activation	chr1	104269573	104269882	MAFA	chr1	104269662	104269676
BACH1	activation	chr1	104269573	104269882	ETV4	chr1	104269720	104269729
BACH1	activation	chr1	104456310	104456971	ZNF423	chr1	104456469	104456483
BACH1	activation	chr1	104456310	104456971	TFAP2C	chr1	104456518	104456530
BACH1	activation	chr1	104456310	104456971	TFAP2A	chr1	104456518	104456530
BACH1	activation	chr1	104456310	104456971	TCF12	chr1	104456530	104456540
BACH1	activation	chr1	104456310	104456971	HIC2	chr1	104456543	104456551
BACH1	activation	chr1	104456310	104456971	KLF5	chr1	104456586	104456595
BACH1	activation	chr1	104456310	104456971	SOX3	chr1	104456639	104456648
BACH1	activation	chr1	104456310	104456971	SOX13	chr1	104456640	104456650
BACH1	activation	chr1	104456310	104456971	NANOG	chr1	104456640	104456650
BACH1	activation	chr1	104456310	104456971	SOX4	chr1	104456640	104456649
BACH1	activation	chr1	104456310	104456971	TFAP2A	chr1	104456733	104456746
BACH1	activation	chr1	104456310	104456971	TFAP2A	chr1	104456789	104456802
BACH1	activation	chr1	104456310	104456971	TFAP2C	chr1	104456789	104456802
BACH1	activation	chr1	104456310	104456971	TCF12	chr1	104456810	104456820
BACH1	activation	chr1	104456310	104456971	HIC2	chr1	104456893	104456901
ETS2	repression_index_4	chr1	107826689	107827595	EOMES	chr1	107826750	107826762
ETS2	repression_index_4	chr1	107826689	107827595	MGA	chr1	107826751	107826758
ETS2	repression_index_4	chr1	107826689	107827595	GATA2	chr1	107826835	107826845
ETS2	repression_index_4	chr1	107826689	107827595	KLF5	chr1	107827083	107827092
ETS2	repression_index_4	chr1	107826689	107827595	TFAP2C	chr1	107827112	107827125
ETS2	repression_index_4	chr1	107826689	107827595	TFAP2A	chr1	107827112	107827125
ETS2	repression_index_4	chr1	107826689	107827595	TFAP2A	chr1	107827114	107827125
ETS2	repression_index_4	chr1	107826689	107827595	TFAP2C	chr1	107827114	107827125
ETS2	repression_index_4	chr1	107826689	107827595	TCF12	chr1	107827196	107827206
ETS2	repression_index_4	chr1	107826689	107827595	SNAI1	chr1	107827197	107827206
ETS2	repression_index_4	chr1	107826689	107827595	ATF3	chr1	107827432	107827443
ETS2	repression_index_4	chr1	107831060	107831741	ETV1	chr1	107831064	107831077
ETS2	repression_index_4	chr1	107831060	107831741	SOX3	chr1	107831125	107831134
ETS2	repression_index_4	chr1	107831060	107831741	HIC2	chr1	107831149	107831157
ETS2	repression_index_4	chr1	107831060	107831741	SOX3	chr1	107831237	107831246
ETS2	repression_index_4	chr1	107831060	107831741	BACH1	chr1	107831345	107831357
ETS2	repression_index_4	chr1	107831060	107831741	OTX2	chr1	107831372	107831383
ETS2	repression_index_4	chr1	107831060	107831741	SOX3	chr1	107831430	107831439
ETS2	repression_index_4	chr1	107831060	107831741	ZIC2	chr1	107831462	107831475
ETS2	repression_index_4	chr1	107831060	107831741	SNAI1	chr1	107831495	107831504
ETS2	repression_index_4	chr1	107831060	107831741	TCF12	chr1	107831495	107831505
ETS2	repression_index_4	chr1	107831060	107831741	EOMES	chr1	107831638	107831650
ETS2	repression_index_4	chr1	107831060	107831741	KLF5	chr1	107831650	107831659
ETS2	repression_index_4	chr1	107831060	107831741	TBX3	chr1	107831650	107831659
ETS2	repression_index_4	chr1	107831060	107831741	KLF5	chr1	107831655	107831664
ETS2	repression_index_4	chr1	107832742	107833899	SOX4	chr1	107832743	107832752
ETS2	repression_index_4	chr1	107832742	107833899	TCF12	chr1	107832815	107832825
ETS2	repression_index_4	chr1	107832742	107833899	SOX4	chr1	107832835	107832844
ETS2	repression_index_4	chr1	107832742	107833899	SOX3	chr1	107832836	107832845
ETS2	repression_index_4	chr1	107832742	107833899	NANOG	chr1	107833044	107833054
ETS2	repression_index_4	chr1	107832742	107833899	IRF8	chr1	107833256	107833269
ETS2	repression_index_4	chr1	107832742	107833899	TFAP2A	chr1	107833299	107833312
ETS2	repression_index_4	chr1	107832742	107833899	TFAP2C	chr1	107833299	107833312
ETS2	repression_index_4	chr1	107832742	107833899	TFAP2C	chr1	107833300	107833311
ETS2	repression_index_4	chr1	107832742	107833899	TFAP2A	chr1	107833300	107833311
ETS2	repression_index_4	chr1	107832742	107833899	BACH1	chr1	107833321	107833333
ETS2	repression_index_4	chr1	107832742	107833899	PITX2	chr1	107833493	107833500
ETS2	repression_index_4	chr1	107832742	107833899	SOX3	chr1	107833553	107833562
ETS2	repression_index_4	chr1	107832742	107833899	ZIC2	chr1	107833657	107833670
ETS2	repression_index_4	chr1	107832742	107833899	TCF7L1	chr1	107833865	107833876
ETS2	repression_index_4	chr1	107832742	107833899	GATA2	chr1	107833871	107833881
ETS2	repression_index_4	chr1	107837031	107838042	SOX3	chr1	107837108	107837117
ETS2	repression_index_4	chr1	107837031	107838042	GRHL2	chr1	107837141	107837152
ETS2	repression_index_4	chr1	107837031	107838042	SOX4	chr1	107837160	107837169
ETS2	repression_index_4	chr1	107837031	107838042	SOX3	chr1	107837188	107837197
ETS2	repression_index_4	chr1	107837031	107838042	CDX2	chr1	107837249	107837260
ETS2	repression_index_4	chr1	107837031	107838042	ZIC2	chr1	107837385	107837398
ETS2	repression_index_4	chr1	107837031	107838042	MYC	chr1	107837426	107837437
ETS2	repression_index_4	chr1	107837031	107838042	MYCN	chr1	107837426	107837437
ETS2	repression_index_4	chr1	107837031	107838042	HIF1A	chr1	107837426	107837435
ETS2	repression_index_4	chr1	107837031	107838042	MAFA	chr1	107837515	107837529
ETS2	repression_index_4	chr1	107837031	107838042	ESRRG	chr1	107837587	107837596
ETS2	repression_index_4	chr1	107837031	107838042	GRHL2	chr1	107837608	107837619
ETS2	repression_index_4	chr1	107837031	107838042	GRHL1	chr1	107837608	107837619
ETS2	repression_index_4	chr1	107837031	107838042	RREB1	chr1	107837651	107837670
ETS2	repression_index_4	chr1	107837031	107838042	SOX3	chr1	107837662	107837671
ETS2	repression_index_4	chr1	107837031	107838042	SOX3	chr1	107837667	107837676
ETS2	repression_index_4	chr1	107837031	107838042	HIC2	chr1	107837718	107837726
ETS2	repression_index_4	chr1	107837031	107838042	ZIC2	chr1	107837802	107837815
ETS2	repression_index_4	chr1	107837031	107838042	TCF12	chr1	107837910	107837920
ETS2	repression_index_4	chr1	107837031	107838042	TCF12	chr1	107837911	107837921
ETS2	repression_index_4	chr1	107837031	107838042	NFKB2	chr1	107837972	107837984
ETS2	repression_index_4	chr1	107837031	107838042	TFAP2A	chr1	107838016	107838028
ETS2	repression_index_4	chr1	107837031	107838042	TFAP2A	chr1	107838028	107838041
ETS2	repression_index_4	chr1	107927169	107927408	TCF12	chr1	107927190	107927200
ETS2	repression_index_4	chr1	107927169	107927408	TFAP2A	chr1	107927309	107927321
ETS2	repression_index_4	chr1	107927169	107927408	TFAP2C	chr1	107927309	107927321
ETS2	repression_index_4	chr1	107927169	107927408	TFAP2C	chr1	107927310	107927321
ETS2	repression_index_4	chr1	107927169	107927408	TFAP2A	chr1	107927310	107927321
ETS2	repression_index_4	chr1	107927169	107927408	TFAP2A	chr1	107927310	107927323
ETS2	repression_index_4	chr1	107927169	107927408	ETV4	chr1	107927344	107927353
ETS2	repression_index_4	chr1	107927169	107927408	ETV4	chr1	107927348	107927357
ETS2	repression_index_4	chr1	107927169	107927408	ETV4	chr1	107927352	107927361
SCML2	activation	chr1	120707486	120708461	FOXA2	chr1	120707609	120707619
SCML2	activation	chr1	120707486	120708461	DLX5	chr1	120707636	120707643
SCML2	activation	chr1	120707486	120708461	MSX1	chr1	120707636	120707643
SCML2	activation	chr1	120707486	120708461	BACH1	chr1	120707823	120707835
SCML2	activation	chr1	120707486	120708461	TCF7L1	chr1	120707838	120707849
SCML2	activation	chr1	120707486	120708461	ETV4	chr1	120707866	120707875
SCML2	activation	chr1	120707486	120708461	TCF12	chr1	120707877	120707887
SCML2	activation	chr1	120707486	120708461	MAFA	chr1	120708017	120708031
SCML2	activation	chr1	120707486	120708461	SOX4	chr1	120708033	120708042
SCML2	activation	chr1	120707486	120708461	TCF7L1	chr1	120708090	120708101
SCML2	activation	chr1	120707486	120708461	SOX4	chr1	120708244	120708253
SCML2	activation	chr1	120707486	120708461	SOX3	chr1	120708245	120708254
SCML2	activation	chr1	120707486	120708461	ZIC2	chr1	120708262	120708275
SCML2	activation	chr1	120707486	120708461	HOXA1	chr1	120708342	120708349
SCML2	activation	chr1	120707486	120708461	LHX5	chr1	120708342	120708349
SCML2	activation	chr1	120707486	120708461	EOMES	chr1	120708426	120708438
SCML2	repression_index_4	chr1	120806365	120806912	SOX3	chr1	120806373	120806382
SCML2	repression_index_4	chr1	120806365	120806912	SOX4	chr1	120806374	120806383
SCML2	repression_index_4	chr1	120806365	120806912	ETV1	chr1	120806392	120806405
SCML2	repression_index_4	chr1	120806365	120806912	TCF12	chr1	120806484	120806494
SCML2	repression_index_4	chr1	120813317	120814121	ZIC3	chr1	120813332	120813346
SCML2	repression_index_4	chr1	120813317	120814121	MEIS2	chr1	120813351	120813365
SCML2	repression_index_4	chr1	120813317	120814121	MSX1	chr1	120813370	120813377
SCML2	repression_index_4	chr1	120813317	120814121	SOX3	chr1	120813440	120813449
SCML2	repression_index_4	chr1	120813317	120814121	SOX4	chr1	120813441	120813450
SCML2	repression_index_4	chr1	120813317	120814121	BHLHE40	chr1	120813561	120813570
SCML2	repression_index_4	chr1	120813317	120814121	TFAP2A	chr1	120813573	120813586
SCML2	repression_index_4	chr1	120813317	120814121	TFAP2C	chr1	120813573	120813586
SCML2	repression_index_4	chr1	120813317	120814121	KLF5	chr1	120813593	120813602
SCML2	repression_index_4	chr1	120813317	120814121	OTX2	chr1	120813697	120813708
SCML2	repression_index_4	chr1	120813317	120814121	ESRRG	chr1	120813708	120813717
SCML2	repression_index_4	chr1	120813317	120814121	MSX1	chr1	120813758	120813765
SCML2	repression_index_4	chr1	120813317	120814121	DLX5	chr1	120813758	120813765
SCML2	repression_index_4	chr1	120813317	120814121	EOMES	chr1	120813845	120813857
SCML2	repression_index_4	chr1	120813317	120814121	ZIC2	chr1	120814020	120814033
SCML2	repression_index_4	chr1	120813317	120814121	TFAP2C	chr1	120814063	120814074
SCML2	repression_index_4	chr1	120813317	120814121	TFAP2A	chr1	120814063	120814074
SCML2	repression_index_4	chr1	120813317	120814121	MEIS2	chr1	120814072	120814079
SCML2	repression_index_4	chr1	120821511	120821887	MAFA	chr1	120821538	120821552
SCML2	repression_index_4	chr1	120821511	120821887	EOMES	chr1	120821555	120821567
SCML2	repression_index_4	chr1	120821511	120821887	TBX3	chr1	120821558	120821567
SCML2	repression_index_4	chr1	120821511	120821887	ESRRG	chr1	120821598	120821607
SCML2	repression_index_4	chr1	120821511	120821887	ESRRG	chr1	120821803	120821812
SCML2	repression_index_4	chr1	120829648	120830128	TFAP2A	chr1	120829649	120829661
SCML2	repression_index_4	chr1	120829648	120830128	HIF1A	chr1	120829681	120829690
SCML2	repression_index_4	chr1	120829648	120830128	MYC	chr1	120829681	120829692
SCML2	repression_index_4	chr1	120829648	120830128	HEY1	chr1	120829682	120829691
SCML2	repression_index_4	chr1	120829648	120830128	BHLHE40	chr1	120829682	120829691
SCML2	repression_index_4	chr1	120829648	120830128	HES1	chr1	120829682	120829691
SCML2	repression_index_4	chr1	120829648	120830128	HIF1A	chr1	120829683	120829692
SCML2	repression_index_4	chr1	120829648	120830128	ELF1	chr1	120829779	120829792
SCML2	repression_index_4	chr1	120829648	120830128	ZIC2	chr1	120829809	120829822
SCML2	repression_index_4	chr1	120829648	120830128	MEIS2	chr1	120830093	120830107
SCML2	repression_index_4	chr1	120829648	120830128	KLF5	chr1	120830108	120830117
SCML2	repression_index_4	chr1	120844819	120845099	GRHL2	chr1	120844968	120844979
SCML2	activation	chr1	120853801	120855039	OTX2	chr1	120854023	120854034
SCML2	activation	chr1	120853801	120855039	PITX2	chr1	120854025	120854032
SCML2	activation	chr1	120853801	120855039	TCF12	chr1	120854118	120854128
SCML2	activation	chr1	120853801	120855039	TCF12	chr1	120854119	120854129
SCML2	activation	chr1	120853801	120855039	KLF5	chr1	120854134	120854143
SCML2	activation	chr1	120853801	120855039	ZIC2	chr1	120854201	120854214
SCML2	activation	chr1	120853801	120855039	SOX4	chr1	120854257	120854266
SCML2	activation	chr1	120853801	120855039	SOX3	chr1	120854258	120854267
SCML2	activation	chr1	120853801	120855039	KLF5	chr1	120854313	120854322
SCML2	activation	chr1	120853801	120855039	LHX5	chr1	120854329	120854336
SCML2	activation	chr1	120853801	120855039	SOX4	chr1	120854380	120854389
SCML2	activation	chr1	120853801	120855039	TCF12	chr1	120854400	120854410
SCML2	activation	chr1	120853801	120855039	SNAI1	chr1	120854401	120854410
SCML2	activation	chr1	120853801	120855039	MSX1	chr1	120854418	120854425
SCML2	activation	chr1	120853801	120855039	DLX5	chr1	120854418	120854425
SCML2	activation	chr1	120853801	120855039	ZIC2	chr1	120854508	120854521
SCML2	activation	chr1	120853801	120855039	ELF1	chr1	120854678	120854691
SCML2	activation	chr1	120853801	120855039	ETV4	chr1	120854749	120854758
SCML2	activation	chr1	120853801	120855039	OTX2	chr1	120854847	120854858
SCML2	activation	chr1	120853801	120855039	HIC2	chr1	120854877	120854885
SCML2	activation	chr1	120853801	120855039	MEIS2	chr1	120854958	120854972
SCML2	activation	chr1	120853801	120855039	GRHL2	chr1	120855016	120855027
SCML2	repression_index_4	chr1	120943335	120944122	GATA2	chr1	120943382	120943392
SCML2	repression_index_4	chr1	120943335	120944122	GATA2	chr1	120943438	120943448
SCML2	repression_index_4	chr1	120943335	120944122	KLF5	chr1	120943571	120943580
SCML2	repression_index_4	chr1	120943335	120944122	SOX3	chr1	120943756	120943765
SCML2	repression_index_4	chr1	120943335	120944122	TCF12	chr1	120943781	120943791
SCML2	repression_index_4	chr1	120943335	120944122	SNAI1	chr1	120943781	120943790
SCML2	repression_index_4	chr1	120943335	120944122	TFAP2A	chr1	120943783	120943794
SCML2	repression_index_4	chr1	120943335	120944122	SOX3	chr1	120943880	120943889
SCML2	repression_index_4	chr1	120943335	120944122	EOMES	chr1	120943990	120944002
SCML2	repression_index_4	chr1	120943335	120944122	TBX3	chr1	120943990	120943999
SCML2	repression_index_4	chr1	120943335	120944122	MGA	chr1	120943991	120943998
SCML2	repression_index_4	chr1	120943335	120944122	NANOG	chr1	120944082	120944092
SCML2	repression_index_4	chr1	120943335	120944122	MEF2D	chr1	120944107	120944118
MID1	activation	chr1	124583781	124584874	ZIC2	chr1	124583914	124583927
MID1	activation	chr1	124583781	124584874	ZIC2	chr1	124583956	124583969
MID1	activation	chr1	124583781	124584874	ESRRG	chr1	124584205	124584214
MID1	activation	chr1	124583781	124584874	BACH1	chr1	124584249	124584261
MID1	activation	chr1	124583781	124584874	EOMES	chr1	124584263	124584275
MID1	activation	chr1	124583781	124584874	TFAP2A	chr1	124584356	124584367
MID1	activation	chr1	124583781	124584874	OTX2	chr1	124584365	124584376
MID1	activation	chr1	124583781	124584874	SOX3	chr1	124584437	124584446
MID1	activation	chr1	124583781	124584874	TCF12	chr1	124584800	124584810
MID1	activation	chr1	124583781	124584874	NFKB2	chr1	124584843	124584855
MID1	activation	chr1	124583781	124584874	TFAP2A	chr1	124584849	124584862
MID1	activation	chr1	124583781	124584874	TFAP2A	chr1	124584850	124584863
MID1	activation	chr1	124583781	124584874	TFAP2C	chr1	124584850	124584863
MID1	activation_index_7	chr1	124589877	124591420	TCF12	chr1	124589907	124589917
MID1	activation_index_7	chr1	124589877	124591420	SNAI1	chr1	124589908	124589917
MID1	activation_index_7	chr1	124589877	124591420	TCF12	chr1	124589908	124589918
MID1	activation_index_7	chr1	124589877	124591420	TFAP2A	chr1	124589923	124589934
MID1	activation_index_7	chr1	124589877	124591420	MEIS2	chr1	124590043	124590057
MID1	activation_index_7	chr1	124589877	124591420	MEIS2	chr1	124590129	124590143
MID1	activation_index_7	chr1	124589877	124591420	SOX3	chr1	124590436	124590445
MID1	activation_index_7	chr1	124589877	124591420	ELF1	chr1	124590635	124590648
MID1	activation_index_7	chr1	124589877	124591420	ETV1	chr1	124590635	124590648
MID1	activation_index_7	chr1	124589877	124591420	SNAI1	chr1	124590776	124590785
MID1	activation_index_7	chr1	124589877	124591420	RREB1	chr1	124590792	124590811
MID1	activation_index_7	chr1	124589877	124591420	TCF12	chr1	124590900	124590910
MID1	activation_index_7	chr1	124589877	124591420	SNAI1	chr1	124590901	124590910
MID1	activation_index_7	chr1	124589877	124591420	CDX2	chr1	124590942	124590953
MID1	activation_index_7	chr1	124589877	124591420	KLF5	chr1	124590972	124590981
MID1	activation_index_7	chr1	124589877	124591420	ESRRG	chr1	124591005	124591014
MID1	activation_index_7	chr1	124589877	124591420	TFAP2A	chr1	124591107	124591118
MID1	activation_index_7	chr1	124589877	124591420	KLF5	chr1	124591325	124591334
MID1	activation_index_7	chr1	124589877	124591420	TFAP2C	chr1	124591342	124591355
MID1	activation_index_7	chr1	124589877	124591420	TFAP2C	chr1	124591343	124591356
MID1	activation_index_7	chr1	124589877	124591420	TFAP2A	chr1	124591343	124591356
MID1	activation_index_7	chr1	124589877	124591420	HIC2	chr1	124591407	124591415
MID1	activation	chr1	124596472	124596878	MAFA	chr1	124596479	124596493
MID1	activation	chr1	124596472	124596878	BACH1	chr1	124596481	124596493
MID1	activation	chr1	124596472	124596878	HES1	chr1	124596594	124596603
MID1	activation	chr1	124596472	124596878	HEY1	chr1	124596594	124596603
MID1	activation	chr1	124596472	124596878	HEY1	chr1	124596692	124596701
MID1	activation	chr1	124596472	124596878	MEIS2	chr1	124596817	124596824
MID1	activation	chr1	124605743	124608129	OTX2	chr1	124605782	124605793
MID1	activation	chr1	124605743	124608129	PITX2	chr1	124605784	124605791
MID1	activation	chr1	124605743	124608129	RREB1	chr1	124606206	124606225
MID1	activation	chr1	124605743	124608129	ZIC2	chr1	124606220	124606233
MID1	activation	chr1	124605743	124608129	TFAP2C	chr1	124606291	124606302
MID1	activation	chr1	124605743	124608129	TFAP2A	chr1	124606291	124606302
MID1	activation	chr1	124605743	124608129	TCF12	chr1	124606323	124606333
MID1	activation	chr1	124605743	124608129	TCF12	chr1	124606324	124606334
MID1	activation	chr1	124605743	124608129	MAFA	chr1	124606326	124606340
MID1	activation	chr1	124605743	124608129	TFAP2A	chr1	124606345	124606358
MID1	activation	chr1	124605743	124608129	MEIS2	chr1	124606424	124606431
MID1	activation	chr1	124605743	124608129	TFAP2A	chr1	124606651	124606664
MID1	activation	chr1	124605743	124608129	TFAP2C	chr1	124606651	124606664
MID1	activation	chr1	124605743	124608129	TFAP2C	chr1	124606652	124606665
MID1	activation	chr1	124605743	124608129	TFAP2A	chr1	124606652	124606665
MID1	activation	chr1	124605743	124608129	KLF5	chr1	124606673	124606682
MID1	activation	chr1	124605743	124608129	GATA2	chr1	124606856	124606866
MID1	activation	chr1	124605743	124608129	ELF1	chr1	124606920	124606933
MID1	activation	chr1	124605743	124608129	OTX2	chr1	124606938	124606949
MID1	activation	chr1	124605743	124608129	ETV1	chr1	124606949	124606962
MID1	activation	chr1	124605743	124608129	ELF1	chr1	124606949	124606962
MID1	activation	chr1	124605743	124608129	ETV4	chr1	124606951	124606960
MID1	activation	chr1	124605743	124608129	SOX4	chr1	124606964	124606973
MID1	activation	chr1	124605743	124608129	ZIC3	chr1	124606976	124606990
MID1	activation	chr1	124605743	124608129	ZIC2	chr1	124606978	124606991
MID1	activation	chr1	124605743	124608129	GATA2	chr1	124607239	124607249
MID1	activation	chr1	124605743	124608129	GRHL2	chr1	124607912	124607923
MID1	activation	chr1	124605743	124608129	ETV4	chr1	124608045	124608054
MID1	activation	chr1	124613078	124613602	KLF5	chr1	124613219	124613228
MID1	activation	chr1	124613078	124613602	TFAP2A	chr1	124613262	124613275
MID1	activation	chr1	124613078	124613602	TFAP2C	chr1	124613264	124613275
MID1	activation	chr1	124613078	124613602	TFAP2A	chr1	124613264	124613275
MID1	activation	chr1	124613078	124613602	GRHL2	chr1	124613536	124613547
MID1	activation	chr1	124623700	124625551	BACH1	chr1	124623872	124623884
MID1	activation	chr1	124623700	124625551	SOX4	chr1	124623990	124623999
MID1	activation	chr1	124623700	124625551	GATA2	chr1	124624048	124624058
MID1	activation	chr1	124623700	124625551	OTX2	chr1	124624066	124624077
MID1	activation	chr1	124623700	124625551	PITX2	chr1	124624068	124624075
MID1	activation	chr1	124623700	124625551	MEIS2	chr1	124624399	124624413
MID1	activation	chr1	124623700	124625551	CDX2	chr1	124624442	124624453
MID1	activation	chr1	124623700	124625551	TFAP2A	chr1	124624463	124624476
MID1	activation	chr1	124623700	124625551	CDX2	chr1	124624475	124624486
MID1	activation	chr1	124623700	124625551	FOXA2	chr1	124625179	124625189
MID1	repression_index_4	chr1	124674188	124674494	ELF1	chr1	124674313	124674326
MID1	repression_index_4	chr1	124674188	124674494	ETV1	chr1	124674313	124674326
MID1	repression_index_4	chr1	124674188	124674494	ETV4	chr1	124674315	124674324
MID1	activation	chr1	124759454	124760413	HIC2	chr1	124759768	124759776
MID1	activation	chr1	124759454	124760413	TCF12	chr1	124759873	124759883
MID1	activation	chr1	124759454	124760413	TCF12	chr1	124759874	124759884
MID1	activation	chr1	124759454	124760413	TFAP2C	chr1	124759905	124759916
MID1	activation	chr1	124759454	124760413	TFAP2A	chr1	124759905	124759916
MID1	activation	chr1	124759454	124760413	SOX3	chr1	124760039	124760048
MID1	activation	chr1	124759454	124760413	FOXA2	chr1	124760138	124760148
MID1	activation	chr1	124759454	124760413	SOX4	chr1	124760169	124760178
MID1	activation	chr1	124759454	124760413	ESRRG	chr1	124760235	124760244
MID1	activation	chr1	124759454	124760413	NANOG	chr1	124760383	124760393
MID1	activation	chr1	124759454	124760413	SOX13	chr1	124760383	124760393
MID1	activation	chr1	124777662	124778698	GRHL1	chr1	124777868	124777879
MID1	activation	chr1	124777662	124778698	GRHL3	chr1	124777868	124777879
MID1	activation	chr1	124777662	124778698	GRHL2	chr1	124777868	124777879
MID1	activation	chr1	124777662	124778698	CDX2	chr1	124777885	124777896
MID1	activation	chr1	124777662	124778698	GBX2	chr1	124777985	124777994
MID1	activation	chr1	124777662	124778698	LHX5	chr1	124777986	124777993
MID1	activation	chr1	124777662	124778698	TCF12	chr1	124778517	124778527
MID1	activation	chr1	124777662	124778698	SNAI1	chr1	124778517	124778526
MID1	activation	chr1	124807560	124808053	GBX2	chr1	124807592	124807601
MID1	activation	chr1	124807560	124808053	MEIS2	chr1	124807656	124807670
MID1	activation	chr1	124807560	124808053	ETV1	chr1	124807718	124807731
MID1	activation	chr1	124807560	124808053	ETV4	chr1	124807720	124807729
MID1	activation	chr1	124807560	124808053	HOXA1	chr1	124807760	124807767
MID1	activation	chr1	124807560	124808053	LHX5	chr1	124807760	124807767
MID1	activation	chr1	124807560	124808053	DLX5	chr1	124807760	124807767
MID1	activation	chr1	124807560	124808053	ETV4	chr1	124807831	124807840
MID1	activation	chr1	124807560	124808053	TBX3	chr1	124807886	124807895
MID1	activation	chr1	124807560	124808053	EOMES	chr1	124807886	124807898
MID1	activation	chr1	124807560	124808053	MGA	chr1	124807887	124807894
MID1	activation	chr1	124807560	124808053	ETV1	chr1	124807907	124807920
MID1	activation	chr1	124807560	124808053	ELF1	chr1	124807907	124807920
MID1	activation	chr1	124807560	124808053	ETV4	chr1	124807909	124807918
MID1	activation	chr1	124807560	124808053	ETV4	chr1	124807980	124807989
MID1	activation	chr1	124807560	124808053	HIF1A	chr1	124807985	124807994
ZIC2	activation	chr1	144208867	144210240	SOX3	chr1	144208880	144208889
ZIC2	activation	chr1	144208867	144210240	MAFA	chr1	144208946	144208960
ZIC2	activation	chr1	144208867	144210240	TCF12	chr1	144208952	144208962
ZIC2	activation	chr1	144208867	144210240	ZIC2	chr1	144208962	144208975
ZIC2	activation	chr1	144208867	144210240	TCF12	chr1	144208963	144208973
ZIC2	activation	chr1	144208867	144210240	BACH1	chr1	144209026	144209038
ZIC2	activation	chr1	144208867	144210240	TCF12	chr1	144209121	144209131
ZIC2	activation	chr1	144208867	144210240	SOX3	chr1	144209286	144209295
ZIC2	activation	chr1	144208867	144210240	SOX4	chr1	144209319	144209328
ZIC2	activation	chr1	144208867	144210240	SOX3	chr1	144209320	144209329
ZIC2	activation	chr1	144208867	144210240	SOX3	chr1	144209363	144209372
ZIC2	activation	chr1	144208867	144210240	SOX4	chr1	144209364	144209373
ZIC2	activation	chr1	144208867	144210240	MGA	chr1	144210081	144210088
ZIC2	activation	chr1	144208867	144210240	FOXA2	chr1	144210185	144210195
ZIC2	activation	chr1	144252268	144253081	TFAP2C	chr1	144252286	144252298
ZIC2	activation	chr1	144252268	144253081	TFAP2A	chr1	144252286	144252298
ZIC2	activation	chr1	144252268	144253081	ETV4	chr1	144252361	144252370
ZIC2	activation	chr1	144252268	144253081	KLF5	chr1	144252423	144252432
ZIC2	activation	chr1	144252268	144253081	TFAP2C	chr1	144252446	144252459
ZIC2	activation	chr1	144252268	144253081	TFAP2A	chr1	144252446	144252459
ZIC2	activation	chr1	144252268	144253081	TFAP2A	chr1	144252448	144252459
ZIC2	activation	chr1	144252268	144253081	TFAP2A	chr1	144252482	144252493
ZIC2	activation	chr1	144252268	144253081	TFAP2C	chr1	144252482	144252495
ZIC2	activation	chr1	144252268	144253081	MYC	chr1	144252493	144252504
ZIC2	activation	chr1	144252268	144253081	MAFA	chr1	144252509	144252523
ZIC2	activation	chr1	144252268	144253081	TFAP2A	chr1	144252568	144252579
ZIC2	activation	chr1	144252268	144253081	KLF5	chr1	144252574	144252583
ZIC2	activation	chr1	144252268	144253081	KLF5	chr1	144252579	144252588
ZIC2	activation	chr1	144252268	144253081	TFAP2A	chr1	144252607	144252618
ZIC2	activation	chr1	144252268	144253081	TFAP2C	chr1	144252607	144252618
ZIC2	activation	chr1	144252268	144253081	TFAP2C	chr1	144252623	144252636
ZIC2	activation	chr1	144252268	144253081	TFAP2C	chr1	144252843	144252856
ZIC2	activation	chr1	144252268	144253081	ZIC3	chr1	144252859	144252873
ZIC2	activation	chr1	144252268	144253081	TCF12	chr1	144252860	144252870
ZIC2	activation	chr1	144252268	144253081	SNAI1	chr1	144252860	144252869
ZIC2	activation	chr1	144252268	144253081	ZIC2	chr1	144252861	144252874
ZIC2	activation	chr1	144252268	144253081	TCF12	chr1	144252895	144252905
ZIC2	activation	chr1	144252268	144253081	TCF12	chr1	144252896	144252906
ZIC2	activation	chr1	144252268	144253081	ZIC2	chr1	144252966	144252979
ZIC2	activation	chr1	144252268	144253081	TFAP2C	chr1	144252966	144252979
ZIC2	activation	chr1	144252268	144253081	TFAP2A	chr1	144252983	144252994
ZIC2	activation	chr1	144252268	144253081	GRHL2	chr1	144253034	144253045
ZIC2	activation	chr1	144252268	144253081	TFAP2C	chr1	144253069	144253080
ZIC2	activation	chr1	144252268	144253081	TFAP2A	chr1	144253069	144253080
ZIC2	activation	chr1	144255259	144256376	MAFA	chr1	144255575	144255589
ZIC2	activation	chr1	144255259	144256376	SNAI1	chr1	144255647	144255656
ZIC2	activation	chr1	144255259	144256376	MYC	chr1	144255747	144255758
ZIC2	activation	chr1	144255259	144256376	SOX13	chr1	144255785	144255795
ZIC2	activation	chr1	144255259	144256376	MEIS2	chr1	144255803	144255810
ZIC2	activation	chr1	144255259	144256376	OTX2	chr1	144255899	144255910
ZIC2	activation	chr1	144255259	144256376	MEIS2	chr1	144255980	144255987
ZIC2	activation	chr1	144255259	144256376	ELF1	chr1	144256184	144256197
ZIC2	activation	chr1	144255259	144256376	KLF5	chr1	144256208	144256217
ZIC2	activation	chr1	144255259	144256376	ZIC2	chr1	144256272	144256285
ZIC2	activation	chr1	144260909	144264595	ELF1	chr1	144260982	144260995
ZIC2	activation	chr1	144260909	144264595	ETV1	chr1	144260982	144260995
ZIC2	activation	chr1	144260909	144264595	GRHL2	chr1	144261044	144261055
ZIC2	activation	chr1	144260909	144264595	GRHL1	chr1	144261044	144261055
ZIC2	activation	chr1	144260909	144264595	MEIS2	chr1	144261254	144261261
ZIC2	activation	chr1	144260909	144264595	TCF12	chr1	144261256	144261266
ZIC2	activation	chr1	144260909	144264595	TBX3	chr1	144261508	144261517
ZIC2	activation	chr1	144260909	144264595	TFAP2C	chr1	144261701	144261714
ZIC2	activation	chr1	144260909	144264595	TFAP2A	chr1	144261701	144261714
ZIC2	activation	chr1	144260909	144264595	GRHL2	chr1	144261785	144261796
ZIC2	activation	chr1	144260909	144264595	GRHL2	chr1	144261796	144261807
ZIC2	activation	chr1	144260909	144264595	SNAI1	chr1	144261927	144261936
ZIC2	activation	chr1	144260909	144264595	CDX2	chr1	144261982	144261993
ZIC2	activation	chr1	144260909	144264595	OTX2	chr1	144262053	144262064
ZIC2	activation	chr1	144260909	144264595	PITX2	chr1	144262055	144262062
ZIC2	activation	chr1	144260909	144264595	SOX3	chr1	144262062	144262071
ZIC2	activation	chr1	144260909	144264595	KLF5	chr1	144262069	144262078
ZIC2	activation	chr1	144260909	144264595	HOXA1	chr1	144262190	144262197
ZIC2	activation	chr1	144260909	144264595	LHX5	chr1	144262190	144262197
ZIC2	activation	chr1	144260909	144264595	GRHL2	chr1	144262288	144262299
ZIC2	activation	chr1	144260909	144264595	TFAP2C	chr1	144262354	144262367
ZIC2	activation	chr1	144260909	144264595	TFAP2A	chr1	144262354	144262367
ZIC2	activation	chr1	144260909	144264595	ETS2	chr1	144262365	144262374
ZIC2	activation	chr1	144260909	144264595	ZIC2	chr1	144262453	144262466
ZIC2	activation	chr1	144260909	144264595	ZIC2	chr1	144262508	144262521
ZIC2	activation	chr1	144260909	144264595	ETV1	chr1	144262553	144262566
ZIC2	activation	chr1	144260909	144264595	ETV4	chr1	144262555	144262564
ZIC2	activation	chr1	144260909	144264595	ETS2	chr1	144262556	144262565
ZIC2	activation	chr1	144260909	144264595	MAFA	chr1	144262761	144262775
ZIC2	activation	chr1	144260909	144264595	GATA2	chr1	144263060	144263070
ZIC2	activation	chr1	144260909	144264595	LHX5	chr1	144263095	144263102
ZIC2	activation	chr1	144260909	144264595	TFAP2A	chr1	144263125	144263138
ZIC2	activation	chr1	144260909	144264595	TFAP2C	chr1	144263125	144263138
ZIC2	activation	chr1	144260909	144264595	FOXA2	chr1	144263377	144263387
ZIC2	activation	chr1	144260909	144264595	FOXA2	chr1	144263910	144263920
ZIC2	activation	chr1	144260909	144264595	TCF12	chr1	144264055	144264065
ZIC2	activation	chr1	144260909	144264595	TCF12	chr1	144264056	144264066
ZIC2	activation	chr1	144260909	144264595	HIC2	chr1	144264491	144264499
ZIC2	activation	chr1	144260909	144264595	ZIC2	chr1	144264497	144264510
ZIC2	activation	chr1	144326470	144327058	TFAP2A	chr1	144326514	144326525
ZIC2	activation	chr1	144326470	144327058	TFAP2C	chr1	144326514	144326525
ZIC2	activation	chr1	144326470	144327058	TCF12	chr1	144326517	144326527
ZIC2	activation	chr1	144326470	144327058	TCF12	chr1	144326546	144326556
ZIC2	activation	chr1	144326470	144327058	FOXA2	chr1	144326700	144326710
ZIC2	activation	chr1	144326470	144327058	TFAP2A	chr1	144326773	144326786
ZIC2	activation	chr1	144326470	144327058	TFAP2A	chr1	144326774	144326787
ZIC2	activation	chr1	144326470	144327058	TFAP2C	chr1	144326774	144326787
ZIC2	activation	chr1	144326470	144327058	ZIC2	chr1	144326930	144326943
ZIC2	activation	chr1	144326470	144327058	TFAP2A	chr1	144326954	144326965
ZIC2	activation	chr1	144326470	144327058	TFAP2A	chr1	144327011	144327022
ZIC2	activation	chr1	144326470	144327058	TFAP2C	chr1	144327011	144327022
ZIC2	activation	chr1	144326470	144327058	SOX3	chr1	144327031	144327040
ZIC2	activation	chr1	144326470	144327058	SOX4	chr1	144327032	144327041
ZIC2	activation	chr1	144334914	144339043	HIC2	chr1	144335037	144335045
ZIC2	activation	chr1	144334914	144339043	ZIC2	chr1	144335145	144335158
ZIC2	activation	chr1	144334914	144339043	TCF12	chr1	144335149	144335159
ZIC2	activation	chr1	144334914	144339043	SNAI1	chr1	144335150	144335159
ZIC2	activation	chr1	144334914	144339043	TCF12	chr1	144335150	144335160
ZIC2	activation	chr1	144334914	144339043	ZIC2	chr1	144335670	144335683
ZIC2	activation	chr1	144334914	144339043	ZIC3	chr1	144335671	144335685
ZIC2	activation	chr1	144334914	144339043	ZIC2	chr1	144335746	144335759
ZIC2	activation	chr1	144334914	144339043	TBX3	chr1	144335779	144335788
ZIC2	activation	chr1	144334914	144339043	KLF5	chr1	144335799	144335808
ZIC2	activation	chr1	144334914	144339043	GBX2	chr1	144335862	144335871
ZIC2	activation	chr1	144334914	144339043	DLX5	chr1	144335863	144335870
ZIC2	activation	chr1	144334914	144339043	MSX1	chr1	144335863	144335870
ZIC2	activation	chr1	144334914	144339043	MAFA	chr1	144335908	144335922
ZIC2	activation	chr1	144334914	144339043	TCF12	chr1	144336142	144336152
ZIC2	activation	chr1	144334914	144339043	LHX5	chr1	144336158	144336165
ZIC2	activation	chr1	144334914	144339043	FOXA2	chr1	144336242	144336252
ZIC2	activation	chr1	144334914	144339043	SOX3	chr1	144336495	144336504
ZIC2	activation	chr1	144334914	144339043	SOX4	chr1	144336496	144336505
ZIC2	activation	chr1	144334914	144339043	MEIS2	chr1	144336509	144336516
ZIC2	activation	chr1	144334914	144339043	HOXA1	chr1	144336816	144336823
ZIC2	activation	chr1	144334914	144339043	LHX5	chr1	144336816	144336823
ZIC2	activation	chr1	144334914	144339043	DLX5	chr1	144336816	144336823
ZIC2	activation	chr1	144334914	144339043	ETV1	chr1	144337130	144337143
ZIC2	activation	chr1	144334914	144339043	TCF12	chr1	144337239	144337249
ZIC2	activation	chr1	144334914	144339043	GATA2	chr1	144337283	144337293
ZIC2	activation	chr1	144334914	144339043	ELF1	chr1	144337652	144337665
ZIC2	activation	chr1	144334914	144339043	ETV1	chr1	144337652	144337665
ZIC2	activation	chr1	144334914	144339043	ETV4	chr1	144337654	144337663
ZIC2	activation	chr1	144334914	144339043	CDX2	chr1	144337771	144337782
ZIC2	activation	chr1	144334914	144339043	GRHL2	chr1	144337935	144337946
ZIC2	activation	chr1	144334914	144339043	BACH1	chr1	144338133	144338145
ZIC2	activation	chr1	144334914	144339043	ESRRG	chr1	144338246	144338255
ZIC2	activation	chr1	144334914	144339043	ESRRG	chr1	144338610	144338619
ZIC2	activation	chr1	144334914	144339043	OTX2	chr1	144338636	144338647
ZIC2	activation	chr1	144334914	144339043	HOXA1	chr1	144338666	144338673
ZIC2	activation	chr1	144334914	144339043	LHX5	chr1	144338666	144338673
ZIC2	activation	chr1	144334914	144339043	DLX5	chr1	144338666	144338673
ZIC2	activation	chr1	144334914	144339043	TCF7L1	chr1	144338762	144338773
ZIC2	activation	chr1	144334914	144339043	MYC	chr1	144338960	144338971
ZIC2	activation	chr1	144334914	144339043	HES1	chr1	144338961	144338970
ZIC2	activation	chr1	144334914	144339043	ETV4	chr1	144339020	144339029
ZIC2	activation	chr1	144339856	144340302	LHX5	chr1	144339905	144339912
ZIC2	activation	chr1	144339856	144340302	TFAP2A	chr1	144340033	144340046
ZIC2	activation	chr1	144339856	144340302	TFAP2C	chr1	144340033	144340046
ZIC2	activation	chr1	144339856	144340302	SOX4	chr1	144340097	144340106
ZIC2	activation	chr1	144339856	144340302	SOX3	chr1	144340098	144340107
ZIC2	activation	chr1	144339856	144340302	ETV1	chr1	144340151	144340164
ZIC2	activation	chr1	144341744	144342146	SOX4	chr1	144341937	144341946
ZIC2	activation	chr1	144341744	144342146	TCF12	chr1	144341967	144341977
ZIC2	activation	chr1	144341744	144342146	MAFA	chr1	144341974	144341988
ZIC2	activation	chr1	144341744	144342146	TFAP2C	chr1	144341987	144342000
ZIC2	activation	chr1	144341744	144342146	ETV5	chr1	144342000	144342010
ZIC2	activation	chr1	144341744	144342146	KLF5	chr1	144342031	144342040
ZIC2	activation	chr1	144341744	144342146	MYCN	chr1	144342052	144342063
ZIC2	activation	chr1	144341744	144342146	BHLHE40	chr1	144342095	144342104
ZIC2	activation	chr1	144341744	144342146	MGA	chr1	144342098	144342105
ZIC2	activation	chr1	144341744	144342146	KLF5	chr1	144342109	144342118
ZIC2	repression_index_5	chr1	144349544	144349984	LHX5	chr1	144349573	144349580
ZIC2	repression_index_5	chr1	144349544	144349984	SOX3	chr1	144349624	144349633
ZIC2	repression_index_5	chr1	144349544	144349984	SOX3	chr1	144349644	144349653
ZIC2	repression_index_5	chr1	144349544	144349984	SOX3	chr1	144349663	144349672
ZIC2	repression_index_5	chr1	144349544	144349984	SOX3	chr1	144349671	144349680
ZIC2	repression_index_5	chr1	144349544	144349984	ETV1	chr1	144349674	144349687
ZIC2	repression_index_5	chr1	144349544	144349984	ELF1	chr1	144349674	144349687
ZIC2	repression_index_5	chr1	144349544	144349984	FOXA2	chr1	144349950	144349960
ZIC2	activation	chr1	144353420	144353984	ZIC2	chr1	144353548	144353561
ZIC2	activation	chr1	144353420	144353984	TCF12	chr1	144353742	144353752
ZIC2	activation	chr1	144373050	144375045	ZIC2	chr1	144373184	144373197
ZIC2	activation	chr1	144373050	144375045	TFAP2C	chr1	144373249	144373262
ZIC2	activation	chr1	144373050	144375045	TFAP2A	chr1	144373249	144373262
ZIC2	activation	chr1	144373050	144375045	TFAP2A	chr1	144373250	144373261
ZIC2	activation	chr1	144373050	144375045	TFAP2C	chr1	144373250	144373261
ZIC2	activation	chr1	144373050	144375045	TFAP2A	chr1	144373476	144373489
ZIC2	activation	chr1	144373050	144375045	TFAP2C	chr1	144373476	144373489
ZIC2	activation	chr1	144373050	144375045	TFAP2A	chr1	144373477	144373490
ZIC2	activation	chr1	144373050	144375045	TFAP2A	chr1	144373477	144373488
ZIC2	activation	chr1	144373050	144375045	TFAP2C	chr1	144373477	144373490
ZIC2	activation	chr1	144373050	144375045	SOX13	chr1	144373533	144373543
ZIC2	activation	chr1	144373050	144375045	RREB1	chr1	144373878	144373897
ZIC2	activation	chr1	144373050	144375045	TFAP2C	chr1	144374025	144374036
ZIC2	activation	chr1	144373050	144375045	TFAP2A	chr1	144374025	144374036
ZIC2	activation	chr1	144373050	144375045	TFAP2A	chr1	144374025	144374038
ZIC2	activation	chr1	144373050	144375045	KLF5	chr1	144374036	144374045
ZIC2	activation	chr1	144373050	144375045	SOX4	chr1	144374284	144374293
ZIC2	activation	chr1	144373050	144375045	MEIS2	chr1	144374344	144374358
ZIC2	activation	chr1	144373050	144375045	MAFA	chr1	144374404	144374418
ZIC2	activation	chr1	144373050	144375045	BACH1	chr1	144374406	144374418
ZIC2	activation	chr1	144373050	144375045	GATA2	chr1	144374594	144374604
ZIC2	activation	chr1	144373050	144375045	GRHL2	chr1	144374723	144374734
ZIC2	activation	chr1	144373050	144375045	TCF12	chr1	144374846	144374856
ZIC2	activation	chr1	144373050	144375045	HOXA1	chr1	144375016	144375023
ZIC2	activation	chr1	144373050	144375045	LHX5	chr1	144375016	144375023
ZIC2	activation	chr1	144373050	144375045	DLX5	chr1	144375016	144375023
ZIC2	activation	chr1	144382524	144385015	HIC2	chr1	144382535	144382543
ZIC2	activation	chr1	144382524	144385015	MSX1	chr1	144382668	144382675
ZIC2	activation	chr1	144382524	144385015	LHX5	chr1	144382672	144382679
ZIC2	activation	chr1	144382524	144385015	TCF12	chr1	144382850	144382860
ZIC2	activation	chr1	144382524	144385015	ELF1	chr1	144382898	144382911
ZIC2	activation	chr1	144382524	144385015	ETV4	chr1	144382900	144382909
ZIC2	activation	chr1	144382524	144385015	MAFA	chr1	144383397	144383411
ZIC2	activation	chr1	144382524	144385015	SOX13	chr1	144383459	144383469
ZIC2	activation	chr1	144382524	144385015	NANOG	chr1	144383459	144383469
ZIC2	activation	chr1	144382524	144385015	MYC	chr1	144383670	144383681
ZIC2	activation	chr1	144382524	144385015	GRHL2	chr1	144383816	144383827
ZIC2	activation	chr1	144382524	144385015	TCF7L1	chr1	144384038	144384049
ZIC2	activation	chr1	144382524	144385015	NANOG	chr1	144384152	144384162
ZIC2	activation	chr1	144382524	144385015	SOX13	chr1	144384152	144384162
ZIC2	activation	chr1	144382524	144385015	SOX4	chr1	144384153	144384162
ZIC2	activation	chr1	144382524	144385015	MEIS2	chr1	144384399	144384406
ZIC2	activation	chr1	144382524	144385015	TFAP2C	chr1	144384404	144384416
ZIC2	activation	chr1	144382524	144385015	TFAP2A	chr1	144384404	144384416
ZIC2	activation	chr1	144382524	144385015	ESRRG	chr1	144384596	144384605
ZIC2	activation	chr1	144382524	144385015	GBX2	chr1	144384724	144384733
ZIC2	activation	chr1	144382524	144385015	DLX5	chr1	144384725	144384732
ZIC2	activation	chr1	144382524	144385015	MSX1	chr1	144384725	144384732
ZIC2	activation	chr1	144382524	144385015	MSX1	chr1	144384973	144384980
ZIC2	activation	chr1	144389570	144391539	TFAP2A	chr1	144389683	144389696
ZIC2	activation	chr1	144389570	144391539	TFAP2C	chr1	144389684	144389697
ZIC2	activation	chr1	144389570	144391539	TFAP2A	chr1	144389684	144389697
ZIC2	activation	chr1	144389570	144391539	TCF7L1	chr1	144389821	144389832
ZIC2	activation	chr1	144389570	144391539	ESRRG	chr1	144389824	144389833
ZIC2	activation	chr1	144389570	144391539	MAFA	chr1	144389849	144389863
ZIC2	activation	chr1	144389570	144391539	BACH1	chr1	144389928	144389940
ZIC2	activation	chr1	144389570	144391539	MEIS2	chr1	144390107	144390114
ZIC2	activation	chr1	144389570	144391539	SNAI1	chr1	144390170	144390179
ZIC2	activation	chr1	144389570	144391539	MEIS2	chr1	144390264	144390271
ZIC2	activation	chr1	144389570	144391539	NANOG	chr1	144390615	144390625
ZIC2	activation	chr1	144389570	144391539	GRHL3	chr1	144390724	144390735
ZIC2	activation	chr1	144389570	144391539	GRHL2	chr1	144390724	144390735
ZIC2	activation	chr1	144389570	144391539	GRHL1	chr1	144390724	144390735
ZIC2	activation	chr1	144389570	144391539	EOMES	chr1	144390876	144390888
ZIC2	activation	chr1	144389570	144391539	TCF7L1	chr1	144390926	144390937
ZIC2	activation	chr1	144389570	144391539	TFAP2A	chr1	144391036	144391047
ZIC2	activation	chr1	144389570	144391539	TFAP2C	chr1	144391036	144391047
ZIC2	activation	chr1	144389570	144391539	TFAP2C	chr1	144391036	144391049
ZIC2	activation	chr1	144389570	144391539	TFAP2A	chr1	144391036	144391049
ZIC2	activation	chr1	144389570	144391539	SOX3	chr1	144391084	144391093
ZIC2	activation	chr1	144389570	144391539	SOX3	chr1	144391214	144391223
ZIC2	activation	chr1	144389570	144391539	TFAP2A	chr1	144391236	144391247
ZIC2	activation	chr1	144389570	144391539	TFAP2C	chr1	144391236	144391247
ZIC2	activation	chr1	144389570	144391539	HOXA1	chr1	144391305	144391312
ZIC2	activation	chr1	144389570	144391539	LHX5	chr1	144391305	144391312
ZIC2	activation	chr1	144389570	144391539	DLX5	chr1	144391305	144391312
ZIC2	activation	chr1	144412284	144415009	GRHL2	chr1	144412286	144412297
ZIC2	activation	chr1	144412284	144415009	GRHL1	chr1	144412286	144412297
ZIC2	activation	chr1	144412284	144415009	SOX4	chr1	144412296	144412305
ZIC2	activation	chr1	144412284	144415009	ZIC2	chr1	144412302	144412315
ZIC2	activation	chr1	144412284	144415009	ETV1	chr1	144412306	144412319
ZIC2	activation	chr1	144412284	144415009	CDX2	chr1	144412422	144412433
ZIC2	activation	chr1	144412284	144415009	TBX3	chr1	144412481	144412490
ZIC2	activation	chr1	144412284	144415009	ZIC2	chr1	144412536	144412549
ZIC2	activation	chr1	144412284	144415009	NFKB2	chr1	144412873	144412885
ZIC2	activation	chr1	144412284	144415009	NFKB2	chr1	144412874	144412886
ZIC2	activation	chr1	144412284	144415009	SNAI1	chr1	144412988	144412997
ZIC2	activation	chr1	144412284	144415009	TCF12	chr1	144412988	144412998
ZIC2	activation	chr1	144412284	144415009	HIC2	chr1	144413022	144413030
ZIC2	activation	chr1	144412284	144415009	TFAP2C	chr1	144413131	144413144
ZIC2	activation	chr1	144412284	144415009	TFAP2A	chr1	144413131	144413144
ZIC2	activation	chr1	144412284	144415009	TFAP2A	chr1	144413132	144413143
ZIC2	activation	chr1	144412284	144415009	GRHL2	chr1	144413340	144413351
ZIC2	activation	chr1	144412284	144415009	GRHL1	chr1	144413340	144413351
ZIC2	activation	chr1	144412284	144415009	GRHL3	chr1	144413340	144413351
ZIC2	activation	chr1	144412284	144415009	OTX2	chr1	144413438	144413449
ZIC2	activation	chr1	144412284	144415009	KLF5	chr1	144413474	144413483
ZIC2	activation	chr1	144412284	144415009	TCF12	chr1	144413598	144413608
ZIC2	activation	chr1	144412284	144415009	ZIC2	chr1	144413634	144413647
ZIC2	activation	chr1	144412284	144415009	GRHL2	chr1	144413981	144413992
ZIC2	activation	chr1	144412284	144415009	GRHL1	chr1	144413981	144413992
ZIC2	activation	chr1	144412284	144415009	CDX2	chr1	144414219	144414230
ZIC2	activation	chr1	144412284	144415009	ZIC2	chr1	144414461	144414474
ZIC2	activation	chr1	144412284	144415009	SOX3	chr1	144414963	144414972
ZIC2	activation	chr1	144421452	144422007	TCF12	chr1	144421611	144421621
ZIC2	activation	chr1	144421452	144422007	TFAP2A	chr1	144421730	144421742
ZIC2	activation	chr1	144421452	144422007	TFAP2C	chr1	144421730	144421742
ZIC2	activation	chr1	144421452	144422007	ZIC2	chr1	144421730	144421743
ZIC2	activation	chr1	144421452	144422007	SOX3	chr1	144421784	144421793
ZIC2	activation	chr1	144421452	144422007	SOX4	chr1	144421785	144421794
ZIC2	activation	chr1	144421452	144422007	LHX5	chr1	144421799	144421806
ZIC2	activation	chr1	144421452	144422007	ETV1	chr1	144421836	144421849
ZIC2	activation	chr1	144421452	144422007	BACH1	chr1	144421968	144421980
ZIC2	activation	chr1	144421452	144422007	TCF12	chr1	144421976	144421986
ZIC2	activation	chr1	144421452	144422007	TCF12	chr1	144421977	144421987
ZIC2	activation	chr1	144422666	144423994	TCF12	chr1	144422691	144422701
ZIC2	activation	chr1	144422666	144423994	ETV1	chr1	144422901	144422914
ZIC2	activation	chr1	144422666	144423994	ETS2	chr1	144422902	144422911
ZIC2	activation	chr1	144422666	144423994	ETV4	chr1	144422903	144422912
ZIC2	activation	chr1	144422666	144423994	GBX2	chr1	144423038	144423047
ZIC2	activation	chr1	144422666	144423994	DLX5	chr1	144423039	144423046
ZIC2	activation	chr1	144422666	144423994	MSX1	chr1	144423039	144423046
ZIC2	activation	chr1	144422666	144423994	KLF5	chr1	144423063	144423072
ZIC2	activation	chr1	144422666	144423994	TFAP2C	chr1	144423395	144423408
ZIC2	activation	chr1	144422666	144423994	TFAP2C	chr1	144423499	144423512
ZIC2	activation	chr1	144422666	144423994	TFAP2A	chr1	144423499	144423512
ZIC2	activation	chr1	144422666	144423994	TFAP2A	chr1	144423500	144423513
ZIC2	activation	chr1	144422666	144423994	TFAP2C	chr1	144423500	144423513
ZIC2	activation	chr1	144422666	144423994	TFAP2A	chr1	144423562	144423574
ZIC2	activation	chr1	144422666	144423994	HIC2	chr1	144423688	144423696
ZIC2	activation	chr1	144422666	144423994	MAFA	chr1	144423796	144423810
ZIC2	activation	chr1	144422666	144423994	GRHL2	chr1	144423808	144423819
ZIC2	activation	chr1	144422666	144423994	GRHL1	chr1	144423808	144423819
ZIC2	activation	chr1	144422666	144423994	GBX2	chr1	144423974	144423983
ZIC2	activation	chr1	144422666	144423994	HOXA1	chr1	144423975	144423982
MBNL2	repression_index_6	chr1	145108074	145108710	KLF5	chr1	145108259	145108268
MBNL2	repression_index_6	chr1	145108074	145108710	ZIC2	chr1	145108263	145108276
MBNL2	repression_index_6	chr1	145108074	145108710	MYCN	chr1	145108299	145108310
MBNL2	repression_index_6	chr1	145108074	145108710	KLF5	chr1	145108384	145108393
MBNL2	repression_index_6	chr1	145108074	145108710	GATA2	chr1	145108459	145108469
MBNL2	repression_index_6	chr1	145108074	145108710	TFAP2C	chr1	145108530	145108543
MBNL2	repression_index_6	chr1	145108074	145108710	TFAP2A	chr1	145108600	145108613
MBNL2	repression_index_6	chr1	145108074	145108710	TFAP2C	chr1	145108600	145108613
MBNL2	repression_index_6	chr1	145108074	145108710	ZNF423	chr1	145108601	145108615
MBNL2	repression_index_6	chr1	145108074	145108710	TFAP2A	chr1	145108601	145108612
MBNL2	repression_index_6	chr1	145108074	145108710	TFAP2C	chr1	145108601	145108612
MBNL2	repression_index_6	chr1	145108074	145108710	TFAP2C	chr1	145108601	145108614
MBNL2	repression_index_6	chr1	145108074	145108710	TFAP2A	chr1	145108627	145108639
MBNL2	repression_index_6	chr1	145108074	145108710	TFAP2A	chr1	145108677	145108688
MBNL2	repression_index_6	chr1	145108074	145108710	KLF5	chr1	145108680	145108689
MBNL2	repression_index_6	chr1	145108074	145108710	TFAP2C	chr1	145108684	145108696
MBNL2	repression_index_6	chr1	145108074	145108710	TFAP2A	chr1	145108684	145108696
MBNL2	repression_index_6	chr1	145108074	145108710	TFAP2C	chr1	145108684	145108697
MBNL2	repression_index_6	chr1	145108074	145108710	TFAP2A	chr1	145108684	145108695
MBNL2	repression_index_6	chr1	145108074	145108710	TFAP2C	chr1	145108684	145108695
MBNL2	repression_index_6	chr1	145108074	145108710	TFAP2A	chr1	145108684	145108697
MBNL2	repression_index_5	chr1	145109982	145110213	SOX3	chr1	145109997	145110006
MBNL2	repression_index_5	chr1	145109982	145110213	ETV1	chr1	145110009	145110022
MBNL2	repression_index_5	chr1	145109982	145110213	ELF1	chr1	145110009	145110022
MBNL2	repression_index_5	chr1	145109982	145110213	KLF5	chr1	145110124	145110133
MBNL2	activation	chr1	145116417	145116831	TFAP2A	chr1	145116446	145116459
MBNL2	activation	chr1	145116417	145116831	OTX2	chr1	145116471	145116482
MBNL2	activation	chr1	145116417	145116831	PITX2	chr1	145116473	145116480
MBNL2	activation	chr1	145116417	145116831	ETV1	chr1	145116479	145116492
MBNL2	activation	chr1	145116417	145116831	ELF1	chr1	145116479	145116492
MBNL2	activation	chr1	145116417	145116831	ETV4	chr1	145116481	145116490
MBNL2	activation	chr1	145116417	145116831	ZIC2	chr1	145116483	145116496
MBNL2	activation	chr1	145116417	145116831	SOX4	chr1	145116788	145116797
MBNL2	repression_index_4	chr1	145129501	145130657	OTX2	chr1	145129534	145129545
MBNL2	repression_index_4	chr1	145129501	145130657	PITX2	chr1	145129536	145129543
MBNL2	repression_index_4	chr1	145129501	145130657	TCF12	chr1	145129825	145129835
MBNL2	repression_index_4	chr1	145129501	145130657	TCF12	chr1	145129826	145129836
MBNL2	repression_index_4	chr1	145129501	145130657	TFAP2A	chr1	145129876	145129889
MBNL2	repression_index_4	chr1	145129501	145130657	TFAP2C	chr1	145129876	145129889
MBNL2	repression_index_4	chr1	145129501	145130657	TFAP2A	chr1	145129877	145129890
MBNL2	repression_index_4	chr1	145129501	145130657	ETV1	chr1	145129880	145129893
MBNL2	repression_index_4	chr1	145129501	145130657	ELF1	chr1	145129880	145129893
MBNL2	repression_index_4	chr1	145129501	145130657	ETV4	chr1	145129882	145129891
MBNL2	repression_index_4	chr1	145129501	145130657	KLF5	chr1	145129908	145129917
MBNL2	repression_index_4	chr1	145129501	145130657	ATF3	chr1	145129928	145129939
MBNL2	repression_index_4	chr1	145129501	145130657	OTX2	chr1	145130101	145130112
MBNL2	repression_index_4	chr1	145129501	145130657	CDX2	chr1	145130565	145130576
MBNL2	repression_index_4	chr1	145175858	145176272	ETV4	chr1	145175970	145175979
MBNL2	repression_index_4	chr1	145175858	145176272	MEIS2	chr1	145175985	145175999
MBNL2	repression_index_4	chr1	145175858	145176272	OTX2	chr1	145176035	145176046
MBNL2	repression_index_4	chr1	145175858	145176272	ETV4	chr1	145176056	145176065
MBNL2	repression_index_4	chr1	145175858	145176272	MEIS2	chr1	145176110	145176117
MBNL2	repression_index_4	chr1	145175858	145176272	HIC2	chr1	145176191	145176199
MBNL2	repression_index_4	chr1	145175858	145176272	KLF5	chr1	145176253	145176262
MBNL2	activation	chr1	145246137	145247332	SOX13	chr1	145246279	145246289
MBNL2	activation	chr1	145246137	145247332	NANOG	chr1	145246279	145246289
MBNL2	activation	chr1	145246137	145247332	ETV1	chr1	145246445	145246458
MBNL2	activation	chr1	145246137	145247332	ELF1	chr1	145246445	145246458
MBNL2	activation	chr1	145246137	145247332	ETV4	chr1	145246447	145246456
MBNL2	activation	chr1	145246137	145247332	EOMES	chr1	145246625	145246637
MBNL2	activation	chr1	145246137	145247332	MGA	chr1	145246626	145246633
MBNL2	activation	chr1	145246137	145247332	TFAP2C	chr1	145246670	145246683
MBNL2	activation	chr1	145246137	145247332	TFAP2A	chr1	145246670	145246683
MBNL2	activation	chr1	145246137	145247332	TCF12	chr1	145246694	145246704
MBNL2	activation	chr1	145246137	145247332	TCF12	chr1	145246695	145246705
MBNL2	activation	chr1	145246137	145247332	MEIS2	chr1	145246732	145246739
MBNL2	activation	chr1	145246137	145247332	ETS2	chr1	145246734	145246743
MBNL2	activation	chr1	145246137	145247332	NANOG	chr1	145246744	145246754
MBNL2	activation	chr1	145246137	145247332	SOX13	chr1	145246744	145246754
MBNL2	activation	chr1	145246137	145247332	ZIC2	chr1	145246843	145246856
MBNL2	activation	chr1	145246137	145247332	TCF12	chr1	145246854	145246864
MBNL2	activation	chr1	145246137	145247332	MEIS2	chr1	145246927	145246941
MBNL2	activation	chr1	145246137	145247332	MSX1	chr1	145247050	145247057
MBNL2	activation	chr1	145246137	145247332	GRHL2	chr1	145247251	145247262
MBNL2	activation	chr1	145246137	145247332	ETV4	chr1	145247293	145247302
MBNL2	activation	chr1	145246137	145247332	ZIC2	chr1	145247298	145247311
MBNL2	activation	chr1	145261919	145262240	SNAI1	chr1	145261966	145261975
MBNL2	activation	chr1	145261919	145262240	TCF12	chr1	145261966	145261976
MBNL2	activation	chr1	145261919	145262240	SNAI1	chr1	145262184	145262193
MBNL2	activation	chr1	145261919	145262240	TCF12	chr1	145262184	145262194
MBNL2	activation	chr1	145261919	145262240	FOXA2	chr1	145262226	145262236
MBNL2	activation	chr1	145361047	145361605	TCF12	chr1	145361048	145361058
MBNL2	activation	chr1	145361047	145361605	TCF12	chr1	145361049	145361059
MBNL2	activation	chr1	145361047	145361605	ETS2	chr1	145361226	145361235
MBNL2	activation	chr1	145361047	145361605	ETV5	chr1	145361227	145361237
MBNL2	activation	chr1	145361047	145361605	KLF5	chr1	145361365	145361374
MBNL2	repression_index_4	chr1	145375063	145376267	GRHL1	chr1	145375100	145375111
MBNL2	repression_index_4	chr1	145375063	145376267	GRHL2	chr1	145375100	145375111
MBNL2	repression_index_4	chr1	145375063	145376267	GRHL3	chr1	145375100	145375111
MBNL2	repression_index_4	chr1	145375063	145376267	HIF1A	chr1	145375200	145375209
MBNL2	repression_index_4	chr1	145375063	145376267	OTX2	chr1	145375262	145375273
MBNL2	repression_index_4	chr1	145375063	145376267	PITX2	chr1	145375264	145375271
MBNL2	repression_index_4	chr1	145375063	145376267	ETV4	chr1	145375275	145375284
MBNL2	repression_index_4	chr1	145375063	145376267	KLF5	chr1	145375653	145375662
MBNL2	repression_index_4	chr1	145375063	145376267	FOXA2	chr1	145375697	145375707
MBNL2	repression_index_4	chr1	145375063	145376267	ZIC2	chr1	145375954	145375967
MBNL2	repression_index_4	chr1	145375063	145376267	HIC2	chr1	145375965	145375973
MBNL2	repression_index_4	chr1	145375063	145376267	MAFA	chr1	145376223	145376237
MBNL2	repression_index_4	chr1	145375063	145376267	SNAI1	chr1	145376235	145376244
MBNL2	repression_index_4	chr1	145375063	145376267	TCF12	chr1	145376235	145376245
MBNL2	repression_index_4	chr1	145386363	145386715	RREB1	chr1	145386469	145386488
MBNL2	repression_index_4	chr1	145386363	145386715	LHX5	chr1	145386506	145386513
MBNL2	repression_index_4	chr1	145409046	145409748	TCF12	chr1	145409119	145409129
MBNL2	repression_index_4	chr1	145409046	145409748	EOMES	chr1	145409170	145409182
MBNL2	repression_index_4	chr1	145409046	145409748	TBX3	chr1	145409170	145409179
MBNL2	repression_index_4	chr1	145409046	145409748	MGA	chr1	145409171	145409178
MBNL2	repression_index_4	chr1	145409046	145409748	MYC	chr1	145409199	145409210
MBNL2	repression_index_4	chr1	145409046	145409748	KLF5	chr1	145409321	145409330
MBNL2	repression_index_4	chr1	145409046	145409748	ETV4	chr1	145409412	145409421
MBNL2	repression_index_4	chr1	145409046	145409748	GRHL2	chr1	145409505	145409516
MBNL2	repression_index_4	chr1	145409046	145409748	HIF1A	chr1	145409549	145409558
MBNL2	repression_index_4	chr1	145409046	145409748	ZIC2	chr1	145409578	145409591
MBNL2	repression_index_4	chr1	145409046	145409748	MYC	chr1	145409587	145409598
MBNL2	repression_index_4	chr1	145409046	145409748	TCF12	chr1	145409650	145409660
MBNL2	activation	chr1	145412678	145413785	TBX3	chr1	145412691	145412700
MBNL2	activation	chr1	145412678	145413785	TFAP2C	chr1	145412917	145412930
MBNL2	activation	chr1	145412678	145413785	ZIC2	chr1	145413007	145413020
MBNL2	activation	chr1	145412678	145413785	TFAP2A	chr1	145413049	145413062
MBNL2	activation	chr1	145412678	145413785	HIC2	chr1	145413113	145413121
MBNL2	activation	chr1	145412678	145413785	MEIS2	chr1	145413218	145413225
MBNL2	activation	chr1	145412678	145413785	MAFA	chr1	145413260	145413274
MBNL2	activation	chr1	145412678	145413785	CDX2	chr1	145413310	145413321
MBNL2	activation	chr1	145412678	145413785	TFAP2A	chr1	145413334	145413347
MBNL2	activation	chr1	145412678	145413785	MAFA	chr1	145413350	145413364
MBNL2	activation	chr1	145412678	145413785	TBX3	chr1	145413372	145413381
MBNL2	activation	chr1	145412678	145413785	ETV1	chr1	145413435	145413448
MBNL2	activation	chr1	145412678	145413785	ELF1	chr1	145413435	145413448
MBNL2	activation	chr1	145412678	145413785	ETV4	chr1	145413437	145413446
MBNL2	activation	chr1	145412678	145413785	HIC2	chr1	145413656	145413664
MBNL2	activation	chr1	145412678	145413785	GATA2	chr1	145413714	145413724
MBNL2	activation	chr1	145421198	145422513	ZIC2	chr1	145421261	145421274
MBNL2	activation	chr1	145421198	145422513	ETV4	chr1	145421388	145421397
MBNL2	activation	chr1	145421198	145422513	ETV1	chr1	145421413	145421426
MBNL2	activation	chr1	145421198	145422513	ETV4	chr1	145421415	145421424
MBNL2	activation	chr1	145421198	145422513	KLF5	chr1	145421463	145421472
MBNL2	activation	chr1	145421198	145422513	KLF5	chr1	145421531	145421540
MBNL2	activation	chr1	145421198	145422513	ZIC2	chr1	145421608	145421621
MBNL2	activation	chr1	145421198	145422513	TFAP2A	chr1	145421608	145421620
MBNL2	activation	chr1	145421198	145422513	MAFA	chr1	145421939	145421953
MBNL2	activation	chr1	145421198	145422513	TFAP2A	chr1	145422162	145422175
MBNL2	activation	chr1	145421198	145422513	TFAP2C	chr1	145422162	145422175
MBNL2	activation	chr1	145421198	145422513	TFAP2A	chr1	145422163	145422176
MBNL2	activation	chr1	145421198	145422513	TFAP2C	chr1	145422163	145422176
MBNL2	activation	chr1	145421198	145422513	ELF1	chr1	145422198	145422211
MBNL2	activation	chr1	145421198	145422513	TCF12	chr1	145422276	145422286
MBNL2	activation	chr1	145421198	145422513	MEIS2	chr1	145422281	145422288
MBNL2	activation	chr1	145421198	145422513	MYC	chr1	145422376	145422387
MBNL2	activation	chr1	145421198	145422513	HIF1A	chr1	145422376	145422385
MBNL2	activation	chr1	145421198	145422513	HEY1	chr1	145422377	145422386
MBNL2	activation	chr1	145421198	145422513	BHLHE40	chr1	145422377	145422386
MBNL2	activation	chr1	145421198	145422513	HES1	chr1	145422377	145422386
MBNL2	activation	chr1	145421198	145422513	KLF5	chr1	145422404	145422413
MBNL2	activation	chr1	145421198	145422513	FOXA2	chr1	145422425	145422435
MBNL2	activation	chr1	145434103	145434518	LHX5	chr1	145434114	145434121
MBNL2	activation	chr1	145434103	145434518	SOX4	chr1	145434119	145434128
MBNL2	activation	chr1	145434103	145434518	CDX2	chr1	145434172	145434183
MBNL2	activation	chr1	145434103	145434518	MEIS2	chr1	145434198	145434205
MBNL2	activation	chr1	145434103	145434518	MYC	chr1	145434454	145434465
MBNL2	activation	chr1	145434103	145434518	MYCN	chr1	145434454	145434465
MBNL2	activation	chr1	145434103	145434518	HIF1A	chr1	145434454	145434463
MBNL2	activation	chr1	145434103	145434518	HEY1	chr1	145434455	145434464
MBNL2	activation	chr1	145434103	145434518	FOXA2	chr1	145434496	145434506
MBNL2	activation	chr1	145435310	145435916	GRHL2	chr1	145435331	145435342
MBNL2	activation	chr1	145435310	145435916	MEIS2	chr1	145435355	145435362
MBNL2	activation	chr1	145435310	145435916	NFKB2	chr1	145435411	145435423
MBNL2	activation	chr1	145435310	145435916	MAFA	chr1	145435453	145435467
MBNL2	activation	chr1	145435310	145435916	MAFA	chr1	145435838	145435852
MBNL2	repression_index_4	chr1	145436175	145437468	SOX13	chr1	145436202	145436212
MBNL2	repression_index_4	chr1	145436175	145437468	NANOG	chr1	145436202	145436212
MBNL2	repression_index_4	chr1	145436175	145437468	SOX4	chr1	145436203	145436212
MBNL2	repression_index_4	chr1	145436175	145437468	SOX3	chr1	145436204	145436213
MBNL2	repression_index_4	chr1	145436175	145437468	ATF3	chr1	145436245	145436256
MBNL2	repression_index_4	chr1	145436175	145437468	TCF12	chr1	145436279	145436289
MBNL2	repression_index_4	chr1	145436175	145437468	TCF12	chr1	145436280	145436290
MBNL2	repression_index_4	chr1	145436175	145437468	GRHL2	chr1	145436297	145436308
MBNL2	repression_index_4	chr1	145436175	145437468	MEIS2	chr1	145436336	145436350
MBNL2	repression_index_4	chr1	145436175	145437468	ETV1	chr1	145436549	145436562
MBNL2	repression_index_4	chr1	145436175	145437468	ELF1	chr1	145436549	145436562
MBNL2	repression_index_4	chr1	145436175	145437468	ETV4	chr1	145436551	145436560
MBNL2	repression_index_4	chr1	145436175	145437468	ETV4	chr1	145436576	145436585
MBNL2	repression_index_4	chr1	145436175	145437468	GBX2	chr1	145436686	145436695
MBNL2	repression_index_4	chr1	145436175	145437468	MSX1	chr1	145436687	145436694
MBNL2	repression_index_4	chr1	145436175	145437468	DLX5	chr1	145436687	145436694
MBNL2	repression_index_4	chr1	145436175	145437468	ETS2	chr1	145436708	145436717
MBNL2	repression_index_4	chr1	145436175	145437468	OTX2	chr1	145436730	145436741
MBNL2	repression_index_4	chr1	145436175	145437468	PITX2	chr1	145436732	145436739
MBNL2	repression_index_4	chr1	145436175	145437468	ETV1	chr1	145436932	145436945
[truncated: 24,536 more rows]

## Sheet: 9h
Supplementary Table. NI transcription factor binding sites within regulatory sites 9h after node graft
target gene	chromatin response	chr_galGal5	regulatory_region_start	regulatory_region_end	TF	TF_binding_chr	TF_binding_site_start	TF_binding_site_end
ZNF277	activation	chr1	26902358	26903580	MEIS2	chr1	26902477	26902484
ZNF277	activation	chr1	26902358	26903580	HIC2	chr1	26902623	26902631
ZNF277	activation	chr1	26902358	26903580	TFAP2A	chr1	26902635	26902648
ZNF277	activation	chr1	26902358	26903580	TFAP2A	chr1	26902670	26902683
ZNF277	activation	chr1	26902358	26903580	TFAP2A	chr1	26902672	26902683
ZNF277	activation	chr1	26902358	26903580	TFAP2A	chr1	26902741	26902754
ZNF277	activation	chr1	26902358	26903580	TFAP2A	chr1	26902743	26902754
ZNF277	activation	chr1	26902358	26903580	ZIC3	chr1	26902760	26902774
ZNF277	activation	chr1	26902358	26903580	KLF6	chr1	26902795	26902805
ZNF277	activation	chr1	26902358	26903580	TFAP2A	chr1	26902818	26902830
ZNF277	activation	chr1	26902358	26903580	HIC2	chr1	26902858	26902866
ZNF277	activation	chr1	26902358	26903580	ZIC3	chr1	26902871	26902885
ZNF277	activation	chr1	26902358	26903580	KLF5	chr1	26902888	26902897
ZNF277	activation	chr1	26902358	26903580	GATA2	chr1	26903024	26903034
ZNF277	activation	chr1	26902358	26903580	GATA2	chr1	26903032	26903042
ZNF277	activation	chr1	26902358	26903580	ZIC2	chr1	26903044	26903057
ZNF277	activation	chr1	26902358	26903580	ETV4	chr1	26903060	26903069
ZNF277	activation	chr1	26902358	26903580	BACH1	chr1	26903108	26903120
ZNF277	activation	chr1	26902358	26903580	BACH1	chr1	26903154	26903166
ZNF277	activation	chr1	26902358	26903580	TCF12	chr1	26903161	26903171
ZNF277	activation	chr1	26902358	26903580	SIX3	chr1	26903171	26903187
ZNF277	activation	chr1	26902358	26903580	NFKB2	chr1	26903173	26903185
ZNF277	activation	chr1	26902358	26903580	ZIC2	chr1	26903202	26903215
ZNF277	activation	chr1	26902358	26903580	TFAP2A	chr1	26903237	26903248
ZNF277	activation	chr1	26902358	26903580	SOX3	chr1	26903326	26903335
ZNF277	activation	chr1	26902358	26903580	SOX4	chr1	26903327	26903336
ZNF277	activation	chr1	26902358	26903580	SOX3	chr1	26903446	26903455
ZNF277	activation	chr1	26902358	26903580	SOX4	chr1	26903447	26903456
ZNF277	activation	chr1	26902358	26903580	SALL1	chr1	26903472	26903482
ZNF277	activation	chr1	26902358	26903580	SALL1	chr1	26903476	26903486
ZNF277	activation	chr1	26902358	26903580	MEIS2	chr1	26903543	26903550
ZNF277	activation	chr1	26927969	26929049	KLF5	chr1	26927975	26927984
ZNF277	activation	chr1	26927969	26929049	TFAP2A	chr1	26928034	26928047
ZNF277	activation	chr1	26927969	26929049	MEF2D	chr1	26928047	26928058
ZNF277	activation	chr1	26927969	26929049	KLF5	chr1	26928059	26928068
ZNF277	activation	chr1	26927969	26929049	TFAP2A	chr1	26928066	26928078
ZNF277	activation	chr1	26927969	26929049	TFAP2A	chr1	26928067	26928078
ZNF277	activation	chr1	26927969	26929049	KLF5	chr1	26928114	26928123
ZNF277	activation	chr1	26927969	26929049	TFAP2A	chr1	26928143	26928155
ZNF277	activation	chr1	26927969	26929049	SOX3	chr1	26928169	26928178
ZNF277	activation	chr1	26927969	26929049	SOX4	chr1	26928170	26928179
ZNF277	activation	chr1	26927969	26929049	MYC	chr1	26928181	26928192
ZNF277	activation	chr1	26927969	26929049	HES1	chr1	26928182	26928191
ZNF277	activation	chr1	26927969	26929049	HEY1	chr1	26928182	26928191
ZNF277	activation	chr1	26927969	26929049	HIC2	chr1	26928245	26928253
ZNF277	activation	chr1	26927969	26929049	HES1	chr1	26928355	26928364
ZNF277	activation	chr1	26927969	26929049	HIF1A	chr1	26928529	26928538
ZNF277	activation	chr1	26927969	26929049	ETV5	chr1	26928607	26928617
ZNF277	activation	chr1	26927969	26929049	ETS2	chr1	26928609	26928618
ZNF277	activation	chr1	26927969	26929049	NANOG	chr1	26928626	26928636
ZNF277	activation	chr1	26927969	26929049	SOX2	chr1	26928626	26928636
ZNF277	activation	chr1	26927969	26929049	CDX2	chr1	26928657	26928668
ZNF277	activation	chr1	26927969	26929049	ELF1	chr1	26928662	26928675
ZNF277	activation	chr1	26927969	26929049	FOXA2	chr1	26928685	26928695
ZNF277	activation	chr1	26927969	26929049	HIF1A	chr1	26928702	26928711
ZNF277	activation	chr1	26927969	26929049	MYC	chr1	26928702	26928713
ZNF277	activation	chr1	26927969	26929049	BHLHE40	chr1	26928703	26928712
ZNF277	activation	chr1	26927969	26929049	HEY1	chr1	26928703	26928712
ZNF277	activation	chr1	26927969	26929049	HIF1A	chr1	26928704	26928713
ZNF277	activation	chr1	26927969	26929049	ZIC2	chr1	26928769	26928782
ZNF277	activation	chr1	26927969	26929049	HIC2	chr1	26928814	26928822
ZNF277	activation	chr1	26927969	26929049	TFAP2A	chr1	26928825	26928836
ZNF277	activation	chr1	26927969	26929049	LMX1B	chr1	26929024	26929034
ZNF277	activation	chr1	26927969	26929049	LMX1B	chr1	26929027	26929037
ZNF277	activation	chr1	26927969	26929049	ETV5	chr1	26929036	26929046
ZNF277	activation	chr1	26936760	26937447	TCF12	chr1	26936781	26936791
ZNF277	activation	chr1	26936760	26937447	SNAI1	chr1	26936782	26936791
ZNF277	activation	chr1	26936760	26937447	TCF12	chr1	26936782	26936792
ZNF277	activation	chr1	26936760	26937447	CDX2	chr1	26936863	26936874
ZNF277	activation	chr1	26936760	26937447	MEIS2	chr1	26936890	26936897
ZNF277	activation	chr1	26936760	26937447	TCF12	chr1	26937022	26937032
ZNF277	activation	chr1	26936760	26937447	ZIC2	chr1	26937095	26937108
ZNF277	activation	chr1	26936760	26937447	KLF5	chr1	26937107	26937116
ZNF277	activation	chr1	26936760	26937447	MEIS2	chr1	26937145	26937152
ZNF277	activation	chr1	26936760	26937447	ETV4	chr1	26937165	26937174
ZNF277	activation	chr1	26936760	26937447	ELF1	chr1	26937181	26937194
ZNF277	activation	chr1	26936760	26937447	ETV4	chr1	26937183	26937192
ZNF277	activation	chr1	26936760	26937447	ETV4	chr1	26937266	26937275
ZNF277	activation	chr1	26936760	26937447	ETV4	chr1	26937299	26937308
ZNF277	activation	chr1	26936760	26937447	HIC2	chr1	26937358	26937366
ZNF277	activation	chr1	26936760	26937447	TCF12	chr1	26937378	26937388
ZNF277	activation	chr1	26936760	26937447	MAFA	chr1	26937380	26937394
ZNF277	activation	chr1	26936760	26937447	ZIC2	chr1	26937385	26937398
ZNF277	activation	chr1	26936760	26937447	SALL1	chr1	26937397	26937404
ZNF277	activation	chr1	26936760	26937447	NFKB2	chr1	26937398	26937410
ZNF277	activation	chr1	26942118	26944391	CDX2	chr1	26942188	26942199
ZNF277	activation	chr1	26942118	26944391	OTX2	chr1	26942253	26942264
ZNF277	activation	chr1	26942118	26944391	PITX2	chr1	26942255	26942262
ZNF277	activation	chr1	26942118	26944391	KLF6	chr1	26942294	26942304
ZNF277	activation	chr1	26942118	26944391	ZIC2	chr1	26942317	26942330
ZNF277	activation	chr1	26942118	26944391	TCF7L2	chr1	26942326	26942339
ZNF277	activation	chr1	26942118	26944391	SOX3	chr1	26942328	26942337
ZNF277	activation	chr1	26942118	26944391	SOX4	chr1	26942329	26942338
ZNF277	activation	chr1	26942118	26944391	GATA2	chr1	26942423	26942433
ZNF277	activation	chr1	26942118	26944391	ZIC2	chr1	26942579	26942592
ZNF277	activation	chr1	26942118	26944391	MAFA	chr1	26942709	26942723
ZNF277	activation	chr1	26942118	26944391	BACH1	chr1	26942711	26942723
ZNF277	activation	chr1	26942118	26944391	SP4	chr1	26942712	26942728
ZNF277	activation	chr1	26942118	26944391	KLF5	chr1	26942715	26942724
ZNF277	activation	chr1	26942118	26944391	TCF7L2	chr1	26942770	26942783
ZNF277	activation	chr1	26942118	26944391	ELF1	chr1	26942852	26942865
ZNF277	activation	chr1	26942118	26944391	ETV4	chr1	26942883	26942892
ZNF277	activation	chr1	26942118	26944391	MYC	chr1	26943068	26943079
ZNF277	activation	chr1	26942118	26944391	HIC2	chr1	26943074	26943082
ZNF277	activation	chr1	26942118	26944391	ETV4	chr1	26943148	26943157
ZNF277	activation	chr1	26942118	26944391	TFAP2A	chr1	26943156	26943169
ZNF277	activation	chr1	26942118	26944391	ZNF423	chr1	26943276	26943290
ZNF277	activation	chr1	26942118	26944391	CDX2	chr1	26943528	26943539
ZNF277	activation	chr1	26942118	26944391	SALL1	chr1	26943531	26943541
ZNF277	activation	chr1	26942118	26944391	TCF12	chr1	26943691	26943701
ZNF277	activation	chr1	26942118	26944391	TCF12	chr1	26943692	26943702
ZNF277	activation	chr1	26942118	26944391	E2F2	chr1	26943953	26943968
ZNF277	activation	chr1	26942118	26944391	TFAP2A	chr1	26943960	26943972
ZNF277	activation	chr1	26942118	26944391	DLX5	chr1	26943992	26943999
ZNF277	activation	chr1	26942118	26944391	TFAP2A	chr1	26944106	26944119
ZNF277	activation	chr1	26942118	26944391	BACH1	chr1	26944187	26944199
ZNF277	activation	chr1	26942118	26944391	ZIC2	chr1	26944210	26944223
ZNF277	activation	chr1	26942118	26944391	SIX3	chr1	26944225	26944241
ZNF277	activation	chr1	26942118	26944391	BHLHE40	chr1	26944233	26944242
ZNF277	activation	chr1	26942118	26944391	HEY1	chr1	26944233	26944242
ZNF277	activation	chr1	26942118	26944391	TFAP2A	chr1	26944241	26944254
ZNF277	activation	chr1	26942118	26944391	ZIC2	chr1	26944280	26944293
ZNF277	activation	chr1	26953407	26954435	TFAP2A	chr1	26953414	26953427
ZNF277	activation	chr1	26953407	26954435	TCF7L1	chr1	26953491	26953502
ZNF277	activation	chr1	26953407	26954435	TCF7L2	chr1	26953491	26953504
ZNF277	activation	chr1	26953407	26954435	GRHL2	chr1	26953584	26953595
ZNF277	activation	chr1	26953407	26954435	LHX5	chr1	26953772	26953779
ZNF277	activation	chr1	26953407	26954435	TFAP2A	chr1	26953818	26953831
ZNF277	activation	chr1	26953407	26954435	HIF1A	chr1	26954008	26954017
ZNF277	activation	chr1	26953407	26954435	KLF5	chr1	26954092	26954101
ZNF277	activation	chr1	26953407	26954435	TCF12	chr1	26954114	26954124
ZNF277	activation	chr1	26953407	26954435	SNAI1	chr1	26954115	26954124
ZNF277	activation	chr1	26953407	26954435	TCF12	chr1	26954115	26954125
ZNF277	activation	chr1	26953407	26954435	TCF7L1	chr1	26954159	26954170
ZNF277	activation	chr1	26953407	26954435	TFAP2A	chr1	26954195	26954207
ZNF277	activation	chr1	26953407	26954435	TFAP2A	chr1	26954332	26954345
ZNF277	activation	chr1	26953407	26954435	EOMES	chr1	26954389	26954401
ZNF277	activation	chr1	26958055	26959164	ZIC2	chr1	26958094	26958107
ZNF277	activation	chr1	26958055	26959164	MAFA	chr1	26958102	26958116
ZNF277	activation	chr1	26958055	26959164	MYC	chr1	26958131	26958142
ZNF277	activation	chr1	26958055	26959164	MYCN	chr1	26958131	26958142
ZNF277	activation	chr1	26958055	26959164	HEY1	chr1	26958132	26958141
ZNF277	activation	chr1	26958055	26959164	TFAP2A	chr1	26958164	26958177
ZNF277	activation	chr1	26958055	26959164	HIF1A	chr1	26958311	26958320
ZNF277	activation	chr1	26958055	26959164	MYC	chr1	26958311	26958322
ZNF277	activation	chr1	26958055	26959164	MYCN	chr1	26958311	26958322
ZNF277	activation	chr1	26958055	26959164	TCF12	chr1	26958311	26958321
ZNF277	activation	chr1	26958055	26959164	BHLHE40	chr1	26958312	26958321
ZNF277	activation	chr1	26958055	26959164	HES1	chr1	26958312	26958321
ZNF277	activation	chr1	26958055	26959164	HEY1	chr1	26958312	26958321
ZNF277	activation	chr1	26958055	26959164	HIF1A	chr1	26958313	26958322
ZNF277	activation	chr1	26958055	26959164	KLF5	chr1	26958405	26958414
ZNF277	activation	chr1	26958055	26959164	MGA	chr1	26958413	26958420
ZNF277	activation	chr1	26958055	26959164	HIC2	chr1	26958429	26958437
ZNF277	activation	chr1	26958055	26959164	ZIC2	chr1	26958433	26958446
ZNF277	activation	chr1	26958055	26959164	ZIC2	chr1	26958568	26958581
ZNF277	activation	chr1	26958055	26959164	TCF7L2	chr1	26958621	26958634
ZNF277	activation	chr1	26958055	26959164	ZIC2	chr1	26958625	26958638
ZNF277	activation	chr1	26958055	26959164	ZIC2	chr1	26958656	26958669
ZNF277	activation	chr1	26958055	26959164	ELF1	chr1	26958674	26958687
ZNF277	activation	chr1	26958055	26959164	KLF5	chr1	26958678	26958687
ZNF277	activation	chr1	26958055	26959164	OTX2	chr1	26958771	26958782
ZNF277	activation	chr1	26958055	26959164	PITX2	chr1	26958773	26958780
ZNF277	activation	chr1	26958055	26959164	KLF5	chr1	26959064	26959073
ZNF277	activation	chr1	26958055	26959164	ELF1	chr1	26959069	26959082
ZNF277	activation	chr1	26958055	26959164	ETV4	chr1	26959071	26959080
ZNF277	activation	chr1	26958055	26959164	ETV5	chr1	26959071	26959081
ZNF277	activation	chr1	26958055	26959164	SALL1	chr1	26959131	26959141
ZNF277	activation	chr1	26986304	26987198	ZIC2	chr1	26986334	26986347
ZNF277	activation	chr1	26986304	26987198	SALL1	chr1	26986638	26986645
ZNF277	activation	chr1	26986304	26987198	ELF1	chr1	26986641	26986654
ZNF277	activation	chr1	26986304	26987198	ETV5	chr1	26986642	26986652
ZNF277	activation	chr1	26986304	26987198	ETV4	chr1	26986643	26986652
ZNF277	activation	chr1	26986304	26987198	TFAP2A	chr1	26986693	26986706
ZNF277	activation	chr1	26986304	26987198	TFAP2A	chr1	26986694	26986707
ZNF277	activation	chr1	26986304	26987198	TFAP2A	chr1	26986695	26986706
ZNF277	activation	chr1	26986304	26987198	TFAP2A	chr1	26986695	26986707
ZNF277	activation	chr1	26986304	26987198	TCF7L1	chr1	26986884	26986895
ZNF277	activation	chr1	26986304	26987198	KLF6	chr1	26987019	26987029
ZNF277	activation	chr1	26986304	26987198	GBX2	chr1	26987061	26987070
ZNF277	activation	chr1	26986304	26987198	DLX5	chr1	26987062	26987069
ZNF277	activation	chr1	26986304	26987198	MSX1	chr1	26987062	26987069
ZNF277	activation	chr1	26986304	26987198	CDX2	chr1	26987172	26987183
ZNF277	activation	chr1	26991667	26991985	SOX3	chr1	26991754	26991763
ZNF277	activation	chr1	26991667	26991985	SOX4	chr1	26991755	26991764
ZNF277	activation	chr1	26991667	26991985	LMX1B	chr1	26991936	26991946
ZNF277	activation	chr1	26991667	26991985	SOX3	chr1	26991973	26991982
ZNF277	activation	chr1	26992221	26992829	BHLHE40	chr1	26992486	26992495
ZNF277	activation	chr1	26992221	26992829	HES1	chr1	26992486	26992495
ZNF277	activation	chr1	26992221	26992829	MEIS2	chr1	26992491	26992498
ZNF277	activation	chr1	26992221	26992829	FOXA2	chr1	26992506	26992516
ZNF277	activation	chr1	26992221	26992829	MEIS2	chr1	26992514	26992521
ZNF277	activation	chr1	26992221	26992829	ESRRG	chr1	26992525	26992534
ZNF277	activation	chr1	26992221	26992829	ELF1	chr1	26992540	26992553
ZNF277	activation	chr1	26992221	26992829	ETV4	chr1	26992542	26992551
ZNF277	activation	chr1	26992221	26992829	GATA2	chr1	26992603	26992613
ZNF277	activation	chr1	26992221	26992829	SOX3	chr1	26992711	26992720
ZNF277	activation	chr1	26992221	26992829	CDX2	chr1	26992740	26992751
ZNF277	activation	chr1	27050349	27051394	FOXA2	chr1	27050362	27050372
ZNF277	activation	chr1	27050349	27051394	LMX1B	chr1	27050423	27050433
ZNF277	activation	chr1	27050349	27051394	LMX1B	chr1	27050426	27050436
ZNF277	activation	chr1	27050349	27051394	TCF7L2	chr1	27050582	27050595
ZNF277	activation	chr1	27050349	27051394	MEIS2	chr1	27050621	27050635
ZNF277	activation	chr1	27050349	27051394	SOX3	chr1	27050794	27050803
ZNF277	activation	chr1	27050349	27051394	TFAP2A	chr1	27051004	27051017
ZNF277	activation	chr1	27050349	27051394	SOX3	chr1	27051027	27051036
ZNF277	activation	chr1	27050349	27051394	HIC2	chr1	27051041	27051049
ZNF277	activation	chr1	27050349	27051394	ELF1	chr1	27051052	27051065
ZNF277	activation	chr1	27050349	27051394	ETV4	chr1	27051054	27051063
ZNF277	activation	chr1	27050349	27051394	SIX3	chr1	27051164	27051180
ZNF277	activation	chr1	27050349	27051394	ZIC2	chr1	27051377	27051390
ZNF277	activation	chr1	27077037	27077559	BACH1	chr1	27077207	27077219
ZNF277	activation	chr1	27077037	27077559	TBX3	chr1	27077221	27077230
ZNF277	activation	chr1	27077037	27077559	KLF5	chr1	27077235	27077244
ZNF277	activation	chr1	27077037	27077559	MGA	chr1	27077341	27077348
ZNF277	activation	chr1	27077037	27077559	TCF7L2	chr1	27077463	27077476
ZNF277	activation	chr1	27077037	27077559	ZIC2	chr1	27077481	27077494
ZNF277	activation	chr1	27271035	27272023	KLF6	chr1	27271050	27271060
ZNF277	activation	chr1	27271035	27272023	OTX2	chr1	27271075	27271086
ZNF277	activation	chr1	27271035	27272023	PITX2	chr1	27271077	27271084
ZNF277	activation	chr1	27271035	27272023	MAFA	chr1	27271091	27271105
ZNF277	activation	chr1	27271035	27272023	TCF12	chr1	27271127	27271137
ZNF277	activation	chr1	27271035	27272023	ELF1	chr1	27271175	27271188
ZNF277	activation	chr1	27271035	27272023	ETV4	chr1	27271177	27271186
ZNF277	activation	chr1	27271035	27272023	ETV5	chr1	27271177	27271187
ZNF277	activation	chr1	27271035	27272023	MAFA	chr1	27271200	27271214
ZNF277	activation	chr1	27271035	27272023	KLF6	chr1	27271285	27271295
ZNF277	activation	chr1	27271035	27272023	TFAP2A	chr1	27271335	27271348
ZNF277	activation	chr1	27271035	27272023	MEIS2	chr1	27271359	27271366
ZNF277	activation	chr1	27271035	27272023	TCF12	chr1	27271364	27271374
ZNF277	activation	chr1	27271035	27272023	IRF7	chr1	27271399	27271412
ZNF277	activation	chr1	27271035	27272023	GATA2	chr1	27271715	27271725
ZNF277	activation	chr1	27271035	27272023	MAFA	chr1	27271933	27271947
ZNF277	activation	chr1	27271035	27272023	RREB1	chr1	27271954	27271973
HMGA2	activation	chr1	34150180	34151383	TFAP2A	chr1	34150498	34150509
HMGA2	activation	chr1	34150180	34151383	MYC	chr1	34150521	34150532
HMGA2	activation	chr1	34150180	34151383	HES1	chr1	34150522	34150531
HMGA2	activation	chr1	34150180	34151383	TFAP2A	chr1	34150531	34150543
HMGA2	activation	chr1	34150180	34151383	TFAP2A	chr1	34150531	34150544
HMGA2	activation	chr1	34150180	34151383	ZIC2	chr1	34150531	34150544
HMGA2	activation	chr1	34150180	34151383	ZIC3	chr1	34150532	34150546
HMGA2	activation	chr1	34150180	34151383	KLF5	chr1	34150609	34150618
HMGA2	activation	chr1	34150180	34151383	KLF6	chr1	34150609	34150619
HMGA2	activation	chr1	34150180	34151383	HIC2	chr1	34150656	34150664
HMGA2	activation	chr1	34150180	34151383	MAFA	chr1	34150688	34150702
HMGA2	activation	chr1	34150180	34151383	TFAP2A	chr1	34150764	34150777
HMGA2	activation	chr1	34150180	34151383	TFAP2A	chr1	34150765	34150778
HMGA2	activation	chr1	34150180	34151383	SOX3	chr1	34150887	34150896
HMGA2	activation	chr1	34150180	34151383	PITX2	chr1	34151128	34151135
HMGA2	activation	chr1	34150180	34151383	TFAP2A	chr1	34151151	34151164
HMGA2	activation	chr1	34150180	34151383	ELF1	chr1	34151178	34151191
HMGA2	activation	chr1	34150180	34151383	SALL1	chr1	34151333	34151343
HMGA2	activation	chr1	34150180	34151383	GRHL3	chr1	34151349	34151360
HMGA2	activation	chr1	34153745	34156997	HOXA1	chr1	34153829	34153836
HMGA2	activation	chr1	34153745	34156997	LHX5	chr1	34153829	34153836
HMGA2	activation	chr1	34153745	34156997	ZNF821	chr1	34153973	34153987
HMGA2	activation	chr1	34153745	34156997	ZIC3	chr1	34153987	34154001
HMGA2	activation	chr1	34153745	34156997	ZIC2	chr1	34153989	34154002
HMGA2	activation	chr1	34153745	34156997	KLF5	chr1	34154242	34154251
HMGA2	activation	chr1	34153745	34156997	SOX3	chr1	34154458	34154467
HMGA2	activation	chr1	34153745	34156997	RREB1	chr1	34154574	34154593
HMGA2	activation	chr1	34153745	34156997	ZIC2	chr1	34154653	34154666
HMGA2	activation	chr1	34153745	34156997	ELF1	chr1	34154763	34154776
HMGA2	activation	chr1	34153745	34156997	ETV5	chr1	34154764	34154774
HMGA2	activation	chr1	34153745	34156997	ETV4	chr1	34154765	34154774
HMGA2	activation	chr1	34153745	34156997	SALL1	chr1	34154807	34154814
HMGA2	activation	chr1	34153745	34156997	KLF5	chr1	34154808	34154817
HMGA2	activation	chr1	34153745	34156997	SOX4	chr1	34154824	34154833
HMGA2	activation	chr1	34153745	34156997	SOX3	chr1	34154825	34154834
HMGA2	activation	chr1	34153745	34156997	GRHL1	chr1	34154918	34154929
HMGA2	activation	chr1	34153745	34156997	GRHL2	chr1	34154918	34154929
HMGA2	activation	chr1	34153745	34156997	TCF7L2	chr1	34154965	34154978
HMGA2	activation	chr1	34153745	34156997	TCF7L2	chr1	34155007	34155020
HMGA2	activation	chr1	34153745	34156997	GRHL1	chr1	34155110	34155121
HMGA2	activation	chr1	34153745	34156997	GRHL2	chr1	34155110	34155121
HMGA2	activation	chr1	34153745	34156997	TFAP2A	chr1	34155233	34155245
HMGA2	activation	chr1	34153745	34156997	TFAP2A	chr1	34155234	34155245
HMGA2	activation	chr1	34153745	34156997	TFAP2A	chr1	34155234	34155247
HMGA2	activation	chr1	34153745	34156997	CDX2	chr1	34155245	34155256
HMGA2	activation	chr1	34153745	34156997	GRHL2	chr1	34155377	34155388
HMGA2	activation	chr1	34153745	34156997	SOX13	chr1	34155403	34155413
HMGA2	activation	chr1	34153745	34156997	SOX4	chr1	34155403	34155412
HMGA2	activation	chr1	34153745	34156997	SALL1	chr1	34155433	34155443
HMGA2	activation	chr1	34153745	34156997	IRF7	chr1	34155507	34155520
HMGA2	activation	chr1	34153745	34156997	ETS2	chr1	34155544	34155553
HMGA2	activation	chr1	34153745	34156997	EOMES	chr1	34155594	34155606
HMGA2	activation	chr1	34153745	34156997	SOX3	chr1	34155711	34155720
HMGA2	activation	chr1	34153745	34156997	ETV4	chr1	34156073	34156082
HMGA2	activation	chr1	34153745	34156997	ETS2	chr1	34156074	34156083
HMGA2	activation	chr1	34153745	34156997	GATA2	chr1	34156089	34156099
HMGA2	activation	chr1	34153745	34156997	LMX1B	chr1	34156215	34156225
HMGA2	activation	chr1	34153745	34156997	LMX1B	chr1	34156218	34156228
HMGA2	activation	chr1	34153745	34156997	MEIS2	chr1	34156289	34156296
HMGA2	activation	chr1	34153745	34156997	DLX5	chr1	34156650	34156657
HMGA2	activation	chr1	34153745	34156997	MSX1	chr1	34156650	34156657
HMGA2	activation	chr1	34157202	34158660	DLX5	chr1	34157326	34157333
HMGA2	activation	chr1	34157202	34158660	HOXA1	chr1	34157326	34157333
HMGA2	activation	chr1	34157202	34158660	LHX5	chr1	34157326	34157333
HMGA2	activation	chr1	34157202	34158660	ZIC2	chr1	34157344	34157357
HMGA2	activation	chr1	34157202	34158660	SALL1	chr1	34157406	34157416
HMGA2	activation	chr1	34157202	34158660	SALL1	chr1	34157542	34157552
HMGA2	activation	chr1	34157202	34158660	CDX2	chr1	34157544	34157555
HMGA2	activation	chr1	34157202	34158660	ZIC2	chr1	34157573	34157586
HMGA2	activation	chr1	34157202	34158660	HIF1A	chr1	34157623	34157632
HMGA2	activation	chr1	34157202	34158660	GRHL1	chr1	34157675	34157686
HMGA2	activation	chr1	34157202	34158660	GRHL2	chr1	34157675	34157686
HMGA2	activation	chr1	34157202	34158660	ETV4	chr1	34157797	34157806
HMGA2	activation	chr1	34157202	34158660	TFAP2A	chr1	34157821	34157834
HMGA2	activation	chr1	34157202	34158660	TCF12	chr1	34157890	34157900
HMGA2	activation	chr1	34157202	34158660	GATA2	chr1	34157977	34157987
HMGA2	activation	chr1	34157202	34158660	GATA2	chr1	34158040	34158050
HMGA2	activation	chr1	34157202	34158660	RREB1	chr1	34158150	34158169
HMGA2	activation	chr1	34157202	34158660	RREB1	chr1	34158152	34158171
HMGA2	activation	chr1	34157202	34158660	RREB1	chr1	34158153	34158172
HMGA2	activation	chr1	34157202	34158660	RREB1	chr1	34158155	34158174
HMGA2	activation	chr1	34157202	34158660	RREB1	chr1	34158156	34158175
HMGA2	activation	chr1	34157202	34158660	RREB1	chr1	34158157	34158176
HMGA2	activation	chr1	34157202	34158660	KLF5	chr1	34158158	34158167
HMGA2	activation	chr1	34157202	34158660	KLF6	chr1	34158158	34158168
HMGA2	activation	chr1	34157202	34158660	RREB1	chr1	34158158	34158177
HMGA2	activation	chr1	34157202	34158660	RREB1	chr1	34158159	34158178
HMGA2	activation	chr1	34157202	34158660	SOX3	chr1	34158183	34158192
HMGA2	activation	chr1	34157202	34158660	ZNF423	chr1	34158219	34158233
HMGA2	activation	chr1	34157202	34158660	GBX2	chr1	34158245	34158254
HMGA2	activation	chr1	34157202	34158660	HESX1	chr1	34158245	34158254
HMGA2	activation	chr1	34157202	34158660	MSX1	chr1	34158246	34158253
HMGA2	activation	chr1	34157202	34158660	SOX3	chr1	34158294	34158303
HMGA2	activation	chr1	34157202	34158660	ZIC2	chr1	34158320	34158333
HMGA2	activation	chr1	34157202	34158660	TFAP2A	chr1	34158360	34158372
HMGA2	activation	chr1	34157202	34158660	ESRRG	chr1	34158507	34158516
HMGA2	activation	chr1	34157202	34158660	HES1	chr1	34158631	34158640
HMGA2	activation	chr1	34157202	34158660	HEY1	chr1	34158631	34158640
HMGA2	activation	chr1	34159212	34160507	SALL1	chr1	34159232	34159242
HMGA2	activation	chr1	34159212	34160507	SALL1	chr1	34159236	34159246
HMGA2	activation	chr1	34159212	34160507	TCF7L2	chr1	34159310	34159323
HMGA2	activation	chr1	34159212	34160507	KLF6	chr1	34159421	34159431
HMGA2	activation	chr1	34159212	34160507	GRHL1	chr1	34159519	34159530
HMGA2	activation	chr1	34159212	34160507	GRHL3	chr1	34159519	34159530
HMGA2	activation	chr1	34159212	34160507	ZNF821	chr1	34159631	34159645
HMGA2	activation	chr1	34159212	34160507	TBX3	chr1	34159699	34159708
HMGA2	activation	chr1	34159212	34160507	KLF5	chr1	34159707	34159716
HMGA2	activation	chr1	34159212	34160507	TCF7L1	chr1	34159779	34159790
HMGA2	activation	chr1	34159212	34160507	CDX2	chr1	34159865	34159876
HMGA2	activation	chr1	34159212	34160507	CDX2	chr1	34160044	34160055
HMGA2	activation	chr1	34159212	34160507	TFAP2A	chr1	34160115	34160127
HMGA2	activation	chr1	34159212	34160507	HES1	chr1	34160202	34160211
HMGA2	activation	chr1	34159212	34160507	KLF5	chr1	34160210	34160219
HMGA2	activation	chr1	34159212	34160507	ZIC2	chr1	34160298	34160311
HMGA2	activation	chr1	34159212	34160507	TCF7L2	chr1	34160461	34160474
HMGA2	activation	chr1	34161306	34163246	SOX4	chr1	34161385	34161394
HMGA2	activation	chr1	34161306	34163246	SOX3	chr1	34161386	34161395
HMGA2	activation	chr1	34161306	34163246	ETV5	chr1	34161417	34161427
HMGA2	activation	chr1	34161306	34163246	SOX3	chr1	34161682	34161691
HMGA2	activation	chr1	34161306	34163246	SOX3	chr1	34161690	34161699
HMGA2	activation	chr1	34161306	34163246	TFAP2A	chr1	34161742	34161753
HMGA2	activation	chr1	34161306	34163246	TFAP2A	chr1	34161742	34161755
HMGA2	activation	chr1	34161306	34163246	TCF12	chr1	34161762	34161772
HMGA2	activation	chr1	34161306	34163246	TCF7L2	chr1	34161831	34161844
HMGA2	activation	chr1	34161306	34163246	BACH1	chr1	34161942	34161954
HMGA2	activation	chr1	34161306	34163246	GATA2	chr1	34162019	34162029
HMGA2	activation	chr1	34161306	34163246	ETS2	chr1	34162036	34162045
HMGA2	activation	chr1	34161306	34163246	KLF5	chr1	34162079	34162088
HMGA2	activation	chr1	34161306	34163246	ELF1	chr1	34162097	34162110
HMGA2	activation	chr1	34161306	34163246	ETV4	chr1	34162099	34162108
HMGA2	activation	chr1	34161306	34163246	SOX3	chr1	34162201	34162210
HMGA2	activation	chr1	34161306	34163246	TCF12	chr1	34162250	34162260
HMGA2	activation	chr1	34161306	34163246	SOX13	chr1	34162451	34162461
HMGA2	activation	chr1	34161306	34163246	SOX2	chr1	34162451	34162461
HMGA2	activation	chr1	34161306	34163246	SOX4	chr1	34162452	34162461
HMGA2	activation	chr1	34161306	34163246	GRHL1	chr1	34162620	34162631
HMGA2	activation	chr1	34161306	34163246	GRHL2	chr1	34162620	34162631
HMGA2	activation	chr1	34161306	34163246	SIX3	chr1	34162690	34162706
HMGA2	activation	chr1	34161306	34163246	LMX1B	chr1	34162737	34162747
HMGA2	activation	chr1	34161306	34163246	SNAI1	chr1	34162782	34162791
HMGA2	activation	chr1	34161306	34163246	SOX3	chr1	34162799	34162808
HMGA2	activation	chr1	34161306	34163246	SOX3	chr1	34162885	34162894
HMGA2	activation	chr1	34161306	34163246	SOX3	chr1	34162949	34162958
HMGA2	activation	chr1	34161306	34163246	SOX4	chr1	34162950	34162959
HMGA2	activation	chr1	34161306	34163246	ESRRG	chr1	34162958	34162967
HMGA2	activation	chr1	34161306	34163246	SOX3	chr1	34163072	34163081
HMGA2	activation	chr1	34161306	34163246	DLX5	chr1	34163219	34163226
HMGA2	activation	chr1	34161306	34163246	MSX1	chr1	34163219	34163226
HMGA2	activation	chr1	34197211	34197830	TCF12	chr1	34197267	34197277
HMGA2	activation	chr1	34197211	34197830	TCF12	chr1	34197268	34197278
HMGA2	activation	chr1	34197211	34197830	ZIC2	chr1	34197285	34197298
HMGA2	activation	chr1	34197211	34197830	TCF12	chr1	34197289	34197299
HMGA2	activation	chr1	34197211	34197830	SNAI1	chr1	34197290	34197299
HMGA2	activation	chr1	34197211	34197830	TCF12	chr1	34197290	34197300
HMGA2	activation	chr1	34197211	34197830	MEIS2	chr1	34197464	34197471
HMGA2	activation	chr1	34197211	34197830	TCF12	chr1	34197495	34197505
HMGA2	activation	chr1	34197211	34197830	TCF12	chr1	34197496	34197506
HMGA2	activation	chr1	34197211	34197830	MAFA	chr1	34197537	34197551
HMGA2	activation	chr1	34197211	34197830	ZIC2	chr1	34197542	34197555
HMGA2	activation	chr1	34197211	34197830	TCF12	chr1	34197677	34197687
HMGA2	activation	chr1	34197211	34197830	SOX4	chr1	34197774	34197783
HMGA2	activation	chr1	34197211	34197830	SOX3	chr1	34197775	34197784
HMGA2	activation	chr1	34201627	34208115	ESRRG	chr1	34201711	34201720
HMGA2	activation	chr1	34201627	34208115	GATA2	chr1	34201738	34201748
HMGA2	activation	chr1	34201627	34208115	KLF5	chr1	34201753	34201762
HMGA2	activation	chr1	34201627	34208115	ZIC2	chr1	34201822	34201835
HMGA2	activation	chr1	34201627	34208115	ZIC2	chr1	34201853	34201866
HMGA2	activation	chr1	34201627	34208115	TFAP2A	chr1	34201940	34201951
HMGA2	activation	chr1	34201627	34208115	MYCN	chr1	34202037	34202048
HMGA2	activation	chr1	34201627	34208115	PITX2	chr1	34202045	34202052
HMGA2	activation	chr1	34201627	34208115	DLX5	chr1	34202088	34202095
HMGA2	activation	chr1	34201627	34208115	MSX1	chr1	34202088	34202095
HMGA2	activation	chr1	34201627	34208115	TCF7L2	chr1	34202125	34202138
HMGA2	activation	chr1	34201627	34208115	MEIS2	chr1	34202133	34202147
HMGA2	activation	chr1	34201627	34208115	CDX2	chr1	34202146	34202157
HMGA2	activation	chr1	34201627	34208115	SALL1	chr1	34202149	34202159
HMGA2	activation	chr1	34201627	34208115	TCF12	chr1	34202222	34202232
HMGA2	activation	chr1	34201627	34208115	SNAI1	chr1	34202349	34202358
HMGA2	activation	chr1	34201627	34208115	TCF12	chr1	34202349	34202359
HMGA2	activation	chr1	34201627	34208115	ZNF821	chr1	34202361	34202375
HMGA2	activation	chr1	34201627	34208115	TCF12	chr1	34202535	34202545
HMGA2	activation	chr1	34201627	34208115	TFAP2A	chr1	34202823	34202836
HMGA2	activation	chr1	34201627	34208115	TFAP2A	chr1	34202886	34202897
HMGA2	activation	chr1	34201627	34208115	TFAP2A	chr1	34202915	34202926
HMGA2	activation	chr1	34201627	34208115	TFAP2A	chr1	34202950	34202962
HMGA2	activation	chr1	34201627	34208115	TFAP2A	chr1	34202951	34202962
HMGA2	activation	chr1	34201627	34208115	TFAP2A	chr1	34202958	34202969
HMGA2	activation	chr1	34201627	34208115	TCF12	chr1	34202972	34202982
HMGA2	activation	chr1	34201627	34208115	TFAP2A	chr1	34202982	34202994
HMGA2	activation	chr1	34201627	34208115	TFAP2A	chr1	34202996	34203007
HMGA2	activation	chr1	34201627	34208115	SOX4	chr1	34203022	34203031
HMGA2	activation	chr1	34201627	34208115	SOX3	chr1	34203023	34203032
HMGA2	activation	chr1	34201627	34208115	MYC	chr1	34203048	34203059
HMGA2	activation	chr1	34201627	34208115	MYCN	chr1	34203048	34203059
HMGA2	activation	chr1	34201627	34208115	HES1	chr1	34203049	34203058
HMGA2	activation	chr1	34201627	34208115	HEY1	chr1	34203049	34203058
HMGA2	activation	chr1	34201627	34208115	TCF12	chr1	34203049	34203059
HMGA2	activation	chr1	34201627	34208115	HIF1A	chr1	34203050	34203059
HMGA2	activation	chr1	34201627	34208115	TFAP2A	chr1	34203097	34203109
HMGA2	activation	chr1	34201627	34208115	KLF5	chr1	34203458	34203467
HMGA2	activation	chr1	34201627	34208115	TFAP2A	chr1	34203570	34203581
HMGA2	activation	chr1	34201627	34208115	ZIC2	chr1	34203596	34203609
HMGA2	activation	chr1	34201627	34208115	NFKB2	chr1	34203661	34203673
HMGA2	activation	chr1	34201627	34208115	KLF5	chr1	34203901	34203910
HMGA2	activation	chr1	34201627	34208115	TFAP2A	chr1	34204094	34204105
HMGA2	activation	chr1	34201627	34208115	ELF1	chr1	34204145	34204158
HMGA2	activation	chr1	34201627	34208115	ETV4	chr1	34204147	34204156
HMGA2	activation	chr1	34201627	34208115	TCF12	chr1	34204181	34204191
HMGA2	activation	chr1	34201627	34208115	TFAP2A	chr1	34204292	34204303
HMGA2	activation	chr1	34201627	34208115	TFAP2A	chr1	34204292	34204304
HMGA2	activation	chr1	34201627	34208115	TFAP2A	chr1	34204293	34204305
HMGA2	activation	chr1	34201627	34208115	CEBPB	chr1	34204324	34204333
HMGA2	activation	chr1	34201627	34208115	TFAP2A	chr1	34204411	34204423
HMGA2	activation	chr1	34201627	34208115	KLF5	chr1	34204580	34204589
HMGA2	activation	chr1	34201627	34208115	ZIC2	chr1	34204586	34204599
HMGA2	activation	chr1	34201627	34208115	TFAP2A	chr1	34204631	34204643
HMGA2	activation	chr1	34201627	34208115	NFKB2	chr1	34204637	34204649
HMGA2	activation	chr1	34201627	34208115	TFAP2A	chr1	34204701	34204714
HMGA2	activation	chr1	34201627	34208115	TFAP2A	chr1	34204703	34204714
HMGA2	activation	chr1	34201627	34208115	TFAP2A	chr1	34204710	34204721
HMGA2	activation	chr1	34201627	34208115	NANOG	chr1	34204798	34204808
HMGA2	activation	chr1	34201627	34208115	SOX13	chr1	34204798	34204808
HMGA2	activation	chr1	34201627	34208115	SOX2	chr1	34204798	34204808
HMGA2	activation	chr1	34201627	34208115	TFAP2A	chr1	34204812	34204824
HMGA2	activation	chr1	34201627	34208115	TFAP2A	chr1	34204933	34204944
HMGA2	activation	chr1	34201627	34208115	SALL1	chr1	34205108	34205118
HMGA2	activation	chr1	34201627	34208115	SALL1	chr1	34205112	34205122
HMGA2	activation	chr1	34201627	34208115	SOX3	chr1	34205170	34205179
HMGA2	activation	chr1	34201627	34208115	IRF7	chr1	34205174	34205187
HMGA2	activation	chr1	34201627	34208115	SALL1	chr1	34205215	34205225
HMGA2	activation	chr1	34201627	34208115	SOX3	chr1	34205242	34205251
HMGA2	activation	chr1	34201627	34208115	TFAP2A	chr1	34205320	34205332
HMGA2	activation	chr1	34201627	34208115	TFAP2A	chr1	34205341	34205353
HMGA2	activation	chr1	34201627	34208115	ZIC3	chr1	34205342	34205356
HMGA2	activation	chr1	34201627	34208115	KLF5	chr1	34205349	34205358
HMGA2	activation	chr1	34201627	34208115	SOX4	chr1	34205424	34205433
HMGA2	activation	chr1	34201627	34208115	HIC2	chr1	34205555	34205563
HMGA2	activation	chr1	34201627	34208115	ZIC2	chr1	34205569	34205582
HMGA2	activation	chr1	34201627	34208115	ELF1	chr1	34205570	34205583
HMGA2	activation	chr1	34201627	34208115	SALL1	chr1	34205720	34205727
HMGA2	activation	chr1	34201627	34208115	EOMES	chr1	34205727	34205739
HMGA2	activation	chr1	34201627	34208115	TBX3	chr1	34205727	34205736
HMGA2	activation	chr1	34201627	34208115	MGA	chr1	34205728	34205735
HMGA2	activation	chr1	34201627	34208115	IRF7	chr1	34205851	34205864
HMGA2	activation	chr1	34201627	34208115	TCF7L2	chr1	34206342	34206355
HMGA2	activation	chr1	34201627	34208115	IRF7	chr1	34206346	34206359
HMGA2	activation	chr1	34201627	34208115	ZIC2	chr1	34206521	34206534
HMGA2	activation	chr1	34201627	34208115	HESX1	chr1	34206768	34206777
HMGA2	activation	chr1	34201627	34208115	LHX5	chr1	34206769	34206776
HMGA2	activation	chr1	34201627	34208115	LMX1B	chr1	34206769	34206779
HMGA2	activation	chr1	34201627	34208115	MSX1	chr1	34206785	34206792
HMGA2	activation	chr1	34201627	34208115	ELF1	chr1	34207031	34207044
HMGA2	activation	chr1	34201627	34208115	TCF7L1	chr1	34207133	34207144
HMGA2	activation	chr1	34201627	34208115	ZIC2	chr1	34207219	34207232
HMGA2	activation	chr1	34201627	34208115	E2F2	chr1	34207226	34207241
HMGA2	activation	chr1	34201627	34208115	SOX3	chr1	34207257	34207266
HMGA2	activation	chr1	34201627	34208115	MEIS2	chr1	34207302	34207309
HMGA2	activation	chr1	34201627	34208115	SOX2	chr1	34207377	34207387
HMGA2	activation	chr1	34201627	34208115	RREB1	chr1	34207561	34207580
HMGA2	activation	chr1	34201627	34208115	ESRRG	chr1	34207655	34207664
HMGA2	activation	chr1	34201627	34208115	ZIC2	chr1	34207720	34207733
HMGA2	activation	chr1	34201627	34208115	HIC2	chr1	34208066	34208074
HMGA2	activation	chr1	34211279	34212117	ZNF821	chr1	34211395	34211409
HMGA2	activation	chr1	34211279	34212117	FOXA2	chr1	34211420	34211430
HMGA2	activation	chr1	34211279	34212117	LMX1B	chr1	34211477	34211487
HMGA2	activation	chr1	34211279	34212117	LHX5	chr1	34211480	34211487
HMGA2	activation	chr1	34211279	34212117	CDX2	chr1	34211528	34211539
HMGA2	activation	chr1	34211279	34212117	EOMES	chr1	34211660	34211672
HMGA2	activation	chr1	34211279	34212117	TBX3	chr1	34211663	34211672
HMGA2	activation	chr1	34211279	34212117	MGA	chr1	34211664	34211671
HMGA2	activation	chr1	34211279	34212117	SOX3	chr1	34211721	34211730
HMGA2	activation	chr1	34211279	34212117	FOXA2	chr1	34211815	34211825
HMGA2	activation	chr1	34211279	34212117	BACH1	chr1	34212040	34212052
HMGA2	activation	chr1	34223183	34223509	MEIS2	chr1	34223314	34223321
HMGA2	activation	chr1	34223183	34223509	HESX1	chr1	34223399	34223408
HMGA2	activation	chr1	34223183	34223509	ESRRG	chr1	34223428	34223437
HMGA2	activation	chr1	34223183	34223509	CEBPB	chr1	34223473	34223482
HMGA2	activation	chr1	34223749	34225725	ZIC2	chr1	34223800	34223813
HMGA2	activation	chr1	34223749	34225725	MEIS2	chr1	34223806	34223813
HMGA2	activation	chr1	34223749	34225725	ETS2	chr1	34224089	34224098
HMGA2	activation	chr1	34223749	34225725	MAFA	chr1	34224362	34224376
HMGA2	activation	chr1	34223749	34225725	NANOG	chr1	34224371	34224381
HMGA2	activation	chr1	34223749	34225725	SOX13	chr1	34224371	34224381
HMGA2	activation	chr1	34223749	34225725	SOX3	chr1	34224525	34224534
HMGA2	activation	chr1	34223749	34225725	KLF6	chr1	34224603	34224613
HMGA2	activation	chr1	34223749	34225725	ETS2	chr1	34224729	34224738
HMGA2	activation	chr1	34223749	34225725	EOMES	chr1	34225099	34225111
HMGA2	activation	chr1	34223749	34225725	MGA	chr1	34225103	34225110
HMGA2	activation	chr1	34223749	34225725	MYC	chr1	34225103	34225114
HMGA2	activation	chr1	34223749	34225725	BHLHE40	chr1	34225104	34225113
HMGA2	activation	chr1	34223749	34225725	HES1	chr1	34225104	34225113
HMGA2	activation	chr1	34223749	34225725	HEY1	chr1	34225104	34225113
HMGA2	activation	chr1	34223749	34225725	HIF1A	chr1	34225105	34225114
HMGA2	activation	chr1	34223749	34225725	SOX3	chr1	34225166	34225175
HMGA2	activation	chr1	34223749	34225725	TCF7L2	chr1	34225172	34225185
HMGA2	activation	chr1	34223749	34225725	TCF7L1	chr1	34225174	34225185
HMGA2	activation	chr1	34223749	34225725	ELF1	chr1	34225188	34225201
HMGA2	activation	chr1	34223749	34225725	ETV4	chr1	34225190	34225199
HMGA2	activation	chr1	34223749	34225725	ETV5	chr1	34225190	34225200
HMGA2	activation	chr1	34223749	34225725	MEIS2	chr1	34225325	34225339
HMGA2	activation	chr1	34223749	34225725	LMX1B	chr1	34225369	34225379
HMGA2	activation	chr1	34223749	34225725	MEIS2	chr1	34225475	34225489
HMGA2	activation	chr1	34223749	34225725	SALL1	chr1	34225498	34225508
HMGA2	activation	chr1	34223749	34225725	CDX2	chr1	34225500	34225511
HMGA2	activation	chr1	34223749	34225725	KLF5	chr1	34225560	34225569
HMGA2	activation	chr1	34223749	34225725	MAFA	chr1	34225590	34225604
HMGA2	activation	chr1	34249828	34252655	DLX5	chr1	34249872	34249879
HMGA2	activation	chr1	34249828	34252655	MSX1	chr1	34249872	34249879
HMGA2	activation	chr1	34249828	34252655	ZNF821	chr1	34249915	34249929
HMGA2	activation	chr1	34249828	34252655	IRF7	chr1	34249946	34249959
HMGA2	activation	chr1	34249828	34252655	MEIS2	chr1	34250079	34250093
HMGA2	activation	chr1	34249828	34252655	KLF6	chr1	34250404	34250414
HMGA2	activation	chr1	34249828	34252655	TFAP2A	chr1	34250409	34250420
HMGA2	activation	chr1	34249828	34252655	NANOG	chr1	34250658	34250668
HMGA2	activation	chr1	34249828	34252655	SOX13	chr1	34250658	34250668
HMGA2	activation	chr1	34249828	34252655	SOX2	chr1	34250658	34250668
HMGA2	activation	chr1	34249828	34252655	GRHL2	chr1	34250702	34250713
HMGA2	activation	chr1	34249828	34252655	MEIS2	chr1	34250808	34250815
HMGA2	activation	chr1	34249828	34252655	OTX2	chr1	34251103	34251114
HMGA2	activation	chr1	34249828	34252655	PITX2	chr1	34251105	34251112
HMGA2	activation	chr1	34249828	34252655	TCF12	chr1	34251200	34251210
HMGA2	activation	chr1	34249828	34252655	MEIS2	chr1	34251220	34251234
HMGA2	activation	chr1	34249828	34252655	MEIS2	chr1	34251760	34251774
HMGA2	activation	chr1	34249828	34252655	SOX3	chr1	34251852	34251861
HMGA2	activation	chr1	34249828	34252655	ETV4	chr1	34251960	34251969
HMGA2	activation	chr1	34249828	34252655	OTX2	chr1	34251970	34251981
HMGA2	activation	chr1	34249828	34252655	PITX2	chr1	34251972	34251979
HMGA2	activation	chr1	34249828	34252655	TCF7L2	chr1	34251988	34252001
HMGA2	activation	chr1	34249828	34252655	PITX2	chr1	34252007	34252014
HMGA2	activation	chr1	34249828	34252655	BACH1	chr1	34252011	34252023
HMGA2	activation	chr1	34249828	34252655	FOXA2	chr1	34252024	34252034
HMGA2	activation	chr1	34249828	34252655	LMX1B	chr1	34252131	34252141
HMGA2	activation	chr1	34249828	34252655	LHX5	chr1	34252134	34252141
HMGA2	activation	chr1	34249828	34252655	LMX1B	chr1	34252134	34252144
HMGA2	activation	chr1	34249828	34252655	TCF12	chr1	34252174	34252184
HMGA2	activation	chr1	34249828	34252655	LHX5	chr1	34252262	34252269
HMGA2	activation	chr1	34249828	34252655	LMX1B	chr1	34252262	34252272
HMGA2	activation	chr1	34249828	34252655	HIC2	chr1	34252444	34252452
HMGA2	activation	chr1	34249828	34252655	ETV4	chr1	34252503	34252512
HMGA2	activation	chr1	34249828	34252655	SOX3	chr1	34252578	34252587
HMGA2	activation	chr1	34249828	34252655	SOX4	chr1	34252579	34252588
HMGA2	activation	chr1	34249828	34252655	TCF12	chr1	34252603	34252613
HMGA2	activation	chr1	34263929	34267842	MYC	chr1	34263947	34263958
HMGA2	activation	chr1	34263929	34267842	MYCN	chr1	34263947	34263958
HMGA2	activation	chr1	34263929	34267842	LMX1B	chr1	34264303	34264313
HMGA2	activation	chr1	34263929	34267842	LHX5	chr1	34264306	34264313
HMGA2	activation	chr1	34263929	34267842	TCF7L2	chr1	34264329	34264342
HMGA2	activation	chr1	34263929	34267842	SOX2	chr1	34264447	34264457
HMGA2	activation	chr1	34263929	34267842	SOX4	chr1	34264472	34264481
HMGA2	activation	chr1	34263929	34267842	GATA2	chr1	34264851	34264861
HMGA2	activation	chr1	34263929	34267842	GATA2	chr1	34265007	34265017
HMGA2	activation	chr1	34263929	34267842	SIX3	chr1	34265019	34265035
HMGA2	activation	chr1	34263929	34267842	ELF1	chr1	34265027	34265040
HMGA2	activation	chr1	34263929	34267842	ETV4	chr1	34265029	34265038
HMGA2	activation	chr1	34263929	34267842	SOX3	chr1	34265559	34265568
HMGA2	activation	chr1	34263929	34267842	TCF12	chr1	34265635	34265645
HMGA2	activation	chr1	34263929	34267842	SOX4	chr1	34265682	34265691
HMGA2	activation	chr1	34263929	34267842	MEIS2	chr1	34265723	34265730
HMGA2	activation	chr1	34263929	34267842	TCF12	chr1	34265847	34265857
HMGA2	activation	chr1	34263929	34267842	CEBPB	chr1	34265925	34265934
HMGA2	activation	chr1	34263929	34267842	OTX2	chr1	34266375	34266386
HMGA2	activation	chr1	34263929	34267842	PITX2	chr1	34266377	34266384
HMGA2	activation	chr1	34263929	34267842	GBX2	chr1	34266408	34266417
HMGA2	activation	chr1	34263929	34267842	HESX1	chr1	34266408	34266417
HMGA2	activation	chr1	34263929	34267842	MSX1	chr1	34266409	34266416
HMGA2	activation	chr1	34263929	34267842	TFAP2A	chr1	34266427	34266438
HMGA2	activation	chr1	34263929	34267842	TFAP2A	chr1	34266457	34266470
HMGA2	activation	chr1	34263929	34267842	MAFA	chr1	34266511	34266525
HMGA2	activation	chr1	34263929	34267842	KLF5	chr1	34266578	34266587
HMGA2	activation	chr1	34263929	34267842	ZIC2	chr1	34266650	34266663
HMGA2	activation	chr1	34263929	34267842	KLF5	chr1	34266663	34266672
HMGA2	activation	chr1	34263929	34267842	ZIC2	chr1	34266731	34266744
HMGA2	activation	chr1	34263929	34267842	TCF12	chr1	34266732	34266742
HMGA2	activation	chr1	34263929	34267842	ESRRG	chr1	34266779	34266788
HMGA2	activation	chr1	34263929	34267842	ZIC2	chr1	34266786	34266799
HMGA2	activation	chr1	34263929	34267842	TFAP2A	chr1	34266812	34266825
HMGA2	activation	chr1	34263929	34267842	TFAP2A	chr1	34266813	34266826
HMGA2	activation	chr1	34263929	34267842	SOX3	chr1	34266881	34266890
HMGA2	activation	chr1	34263929	34267842	TFAP2A	chr1	34266884	34266897
HMGA2	activation	chr1	34263929	34267842	ELF1	chr1	34267167	34267180
HMGA2	activation	chr1	34263929	34267842	DLX5	chr1	34267271	34267278
HMGA2	activation	chr1	34263929	34267842	TCF7L2	chr1	34267371	34267384
HMGA2	activation	chr1	34263929	34267842	CDX2	chr1	34267441	34267452
HMGA2	activation	chr1	34263929	34267842	ETS2	chr1	34267493	34267502
HMGA2	activation	chr1	34263929	34267842	ETV4	chr1	34267494	34267503
HMGA2	activation	chr1	34263929	34267842	CEBPB	chr1	34267548	34267557
HMGA2	activation	chr1	34263929	34267842	GRHL2	chr1	34267754	34267765
HMGA2	activation	chr1	34283946	34284595	TCF7L2	chr1	34284164	34284177
HMGA2	activation	chr1	34283946	34284595	TCF7L1	chr1	34284166	34284177
HMGA2	activation	chr1	34283946	34284595	ZIC2	chr1	34284213	34284226
HMGA2	activation	chr1	34283946	34284595	ELF1	chr1	34284310	34284323
HMGA2	activation	chr1	34283946	34284595	MEIS2	chr1	34284451	34284458
HMGA2	activation	chr1	34283946	34284595	SOX3	chr1	34284503	34284512
HMGA2	activation	chr1	34283946	34284595	SOX4	chr1	34284504	34284513
HMGA2	activation	chr1	34284975	34285518	ESRRG	chr1	34285044	34285053
HMGA2	activation	chr1	34284975	34285518	ZIC2	chr1	34285061	34285074
HMGA2	activation	chr1	34284975	34285518	TCF7L2	chr1	34285097	34285110
HMGA2	activation	chr1	34284975	34285518	ELF1	chr1	34285217	34285230
HMGA2	activation	chr1	34284975	34285518	ETV4	chr1	34285219	34285228
HMGA2	activation	chr1	34284975	34285518	EOMES	chr1	34285223	34285235
HMGA2	activation	chr1	34284975	34285518	SOX4	chr1	34285300	34285309
HMGA2	activation	chr1	34284975	34285518	SOX3	chr1	34285301	34285310
HMGA2	activation	chr1	34284975	34285518	ZNF821	chr1	34285354	34285368
HMGA2	activation	chr1	34284975	34285518	SIX3	chr1	34285374	34285390
HMGA2	activation	chr1	34284975	34285518	FOXA2	chr1	34285470	34285480
HMGA2	activation	chr1	34284975	34285518	EOMES	chr1	34285502	34285514
HMGA2	activation	chr1	34284975	34285518	TBX3	chr1	34285502	34285511
HMGA2	activation	chr1	34292875	34293912	TCF12	chr1	34292879	34292889
HMGA2	activation	chr1	34292875	34293912	ZIC2	chr1	34293083	34293096
HMGA2	activation	chr1	34292875	34293912	SOX4	chr1	34293112	34293121
HMGA2	activation	chr1	34292875	34293912	TCF7L2	chr1	34293254	34293267
HMGA2	activation	chr1	34292875	34293912	FOXA2	chr1	34293517	34293527
HMGA2	activation	chr1	34292875	34293912	MYCN	chr1	34293781	34293792
HMGA2	activation	chr1	34292875	34293912	BHLHE40	chr1	34293828	34293837
HMGA2	activation	chr1	34292875	34293912	ZIC2	chr1	34293867	34293880
HMGA2	repression_index_4	chr1	34297168	34297399	TCF12	chr1	34297237	34297247
HMGA2	repression_index_4	chr1	34297168	34297399	TCF12	chr1	34297238	34297248
HMGA2	repression_index_4	chr1	34297168	34297399	HESX1	chr1	34297277	34297286
HMGA2	repression_index_4	chr1	34297168	34297399	GBX2	chr1	34297277	34297286
HMGA2	repression_index_4	chr1	34297168	34297399	HOXA1	chr1	34297278	34297285
HMGA2	repression_index_4	chr1	34297168	34297399	GATA2	chr1	34297287	34297297
HMGA2	activation	chr1	34300011	34300963	KLF5	chr1	34300035	34300044
HMGA2	activation	chr1	34300011	34300963	RREB1	chr1	34300035	34300054
HMGA2	activation	chr1	34300011	34300963	ZIC2	chr1	34300202	34300215
HMGA2	activation	chr1	34300011	34300963	IRF7	chr1	34300218	34300231
HMGA2	activation	chr1	34300011	34300963	SOX3	chr1	34300280	34300289
HMGA2	activation	chr1	34300011	34300963	SOX4	chr1	34300281	34300290
HMGA2	activation	chr1	34300011	34300963	TFAP2A	chr1	34300677	34300688
HMGA2	activation	chr1	34300011	34300963	TFAP2A	chr1	34300693	34300704
HMGA2	activation	chr1	34300011	34300963	HIC2	chr1	34300731	34300739
HMGA2	activation	chr1	34300011	34300963	TCF7L2	chr1	34300806	34300819
HMGA2	activation	chr1	34300011	34300963	TBX3	chr1	34300903	34300912
HMGA2	activation	chr1	34320454	34320933	ELF1	chr1	34320491	34320504
HMGA2	activation	chr1	34320454	34320933	TCF12	chr1	34320505	34320515
HMGA2	activation	chr1	34320454	34320933	SNAI1	chr1	34320517	34320526
HMGA2	activation	chr1	34320454	34320933	TCF12	chr1	34320517	34320527
HMGA2	activation	chr1	34320454	34320933	ZIC2	chr1	34320518	34320531
HMGA2	activation	chr1	34320454	34320933	BACH1	chr1	34320522	34320534
HMGA2	activation	chr1	34320454	34320933	MAFA	chr1	34320522	34320536
HMGA2	activation	chr1	34320454	34320933	ZIC2	chr1	34320533	34320546
HMGA2	activation	chr1	34320454	34320933	TCF12	chr1	34320534	34320544
HMGA2	activation	chr1	34320454	34320933	ZIC2	chr1	34320586	34320599
HMGA2	activation	chr1	34320454	34320933	KLF6	chr1	34320602	34320612
HMGA2	activation	chr1	34320454	34320933	ZIC2	chr1	34320644	34320657
HMGA2	activation	chr1	34320454	34320933	ETV4	chr1	34320681	34320690
HMGA2	activation	chr1	34320454	34320933	SOX3	chr1	34320757	34320766
HMGA2	activation	chr1	34338608	34339059	ETV4	chr1	34338617	34338626
HMGA2	activation	chr1	34338608	34339059	TFAP2A	chr1	34338622	34338635
HMGA2	activation	chr1	34338608	34339059	HIC2	chr1	34338731	34338739
HMGA2	activation	chr1	34338608	34339059	TFAP2A	chr1	34338826	34338837
HMGA2	activation	chr1	34338608	34339059	TFAP2A	chr1	34338826	34338839
HMGA2	activation	chr1	34338608	34339059	HIC2	chr1	34339018	34339026
HMGA2	activation	chr1	34338608	34339059	SOX3	chr1	34339028	34339037
YEATS4	activation	chr1	35429014	35429613	SIX3	chr1	35429054	35429070
YEATS4	activation	chr1	35429014	35429613	ZNF821	chr1	35429087	35429101
YEATS4	activation	chr1	35429014	35429613	ZNF821	chr1	35429091	35429105
YEATS4	activation	chr1	35429014	35429613	HIF1A	chr1	35429135	35429144
YEATS4	activation	chr1	35429014	35429613	ELF1	chr1	35429244	35429257
YEATS4	activation	chr1	35429014	35429613	ETV4	chr1	35429246	35429255
YEATS4	activation	chr1	35429014	35429613	ZIC2	chr1	35429260	35429273
YEATS4	activation	chr1	35429014	35429613	KLF5	chr1	35429411	35429420
YEATS4	activation	chr1	35429014	35429613	CEBPB	chr1	35429428	35429437
YEATS4	activation	chr1	35429014	35429613	ZIC2	chr1	35429476	35429489
YEATS4	activation	chr1	35429014	35429613	ZIC2	chr1	35429515	35429528
YEATS4	activation	chr1	35434867	35435263	MAFA	chr1	35434926	35434940
YEATS4	activation	chr1	35435486	35437860	ESRRG	chr1	35435653	35435662
YEATS4	activation	chr1	35435486	35437860	ESRRG	chr1	35435740	35435749
YEATS4	activation	chr1	35435486	35437860	SOX4	chr1	35435855	35435864
YEATS4	activation	chr1	35435486	35437860	ZIC2	chr1	35435890	35435903
YEATS4	activation	chr1	35435486	35437860	TCF7L1	chr1	35436043	35436054
YEATS4	activation	chr1	35435486	35437860	GRHL2	chr1	35436080	35436091
YEATS4	activation	chr1	35435486	35437860	IRF7	chr1	35436223	35436236
YEATS4	activation	chr1	35435486	35437860	KLF5	chr1	35436338	35436347
YEATS4	activation	chr1	35435486	35437860	KLF6	chr1	35436338	35436348
YEATS4	activation	chr1	35435486	35437860	SIX3	chr1	35436446	35436462
YEATS4	activation	chr1	35435486	35437860	TFAP2A	chr1	35436459	35436472
YEATS4	activation	chr1	35435486	35437860	SNAI1	chr1	35436464	35436473
YEATS4	activation	chr1	35435486	35437860	MAFA	chr1	35436510	35436524
YEATS4	activation	chr1	35435486	35437860	TFAP2A	chr1	35436583	35436596
YEATS4	activation	chr1	35435486	35437860	MYC	chr1	35436595	35436606
YEATS4	activation	chr1	35435486	35437860	MYCN	chr1	35436595	35436606
YEATS4	activation	chr1	35435486	35437860	HES1	chr1	35436596	35436605
YEATS4	activation	chr1	35435486	35437860	HEY1	chr1	35436596	35436605
YEATS4	activation	chr1	35435486	35437860	TFAP2A	chr1	35436697	35436710
YEATS4	activation	chr1	35435486	35437860	TFAP2A	chr1	35436698	35436711
YEATS4	activation	chr1	35435486	35437860	ELF1	chr1	35436768	35436781
YEATS4	activation	chr1	35435486	35437860	ETV4	chr1	35436770	35436779
YEATS4	activation	chr1	35435486	35437860	LMX1B	chr1	35436850	35436860
YEATS4	activation	chr1	35435486	35437860	LMX1B	chr1	35436853	35436863
YEATS4	activation	chr1	35435486	35437860	SOX3	chr1	35436987	35436996
YEATS4	activation	chr1	35435486	35437860	RREB1	chr1	35437052	35437071
YEATS4	activation	chr1	35435486	35437860	ZNF821	chr1	35437076	35437090
YEATS4	activation	chr1	35435486	35437860	CDX2	chr1	35437115	35437126
YEATS4	activation	chr1	35435486	35437860	LMX1B	chr1	35437156	35437166
YEATS4	activation	chr1	35435486	35437860	LMX1B	chr1	35437159	35437169
YEATS4	activation	chr1	35435486	35437860	FOXA2	chr1	35437169	35437179
YEATS4	activation	chr1	35435486	35437860	TCF7L1	chr1	35437272	35437283
YEATS4	activation	chr1	35435486	35437860	CDX2	chr1	35437318	35437329
YEATS4	activation	chr1	35435486	35437860	MEIS2	chr1	35437319	35437333
YEATS4	activation	chr1	35435486	35437860	TCF7L2	chr1	35437352	35437365
YEATS4	activation	chr1	35435486	35437860	ETV4	chr1	35437597	35437606
YEATS4	activation	chr1	35435486	35437860	SOX3	chr1	35437652	35437661
YEATS4	activation	chr1	35435486	35437860	SOX4	chr1	35437653	35437662
YEATS4	activation	chr1	35435486	35437860	OTX2	chr1	35437696	35437707
YEATS4	activation	chr1	35435486	35437860	PITX2	chr1	35437698	35437705
YEATS4	activation	chr1	35448729	35449708	ZIC2	chr1	35448818	35448831
YEATS4	activation	chr1	35448729	35449708	TCF12	chr1	35448829	35448839
YEATS4	activation	chr1	35448729	35449708	TCF12	chr1	35448830	35448840
YEATS4	activation	chr1	35448729	35449708	MAFA	chr1	35448832	35448846
YEATS4	activation	chr1	35448729	35449708	KLF5	chr1	35448870	35448879
YEATS4	activation	chr1	35448729	35449708	TFAP2A	chr1	35448875	35448887
YEATS4	activation	chr1	35448729	35449708	TFAP2A	chr1	35448922	35448934
YEATS4	activation	chr1	35448729	35449708	SNAI1	chr1	35448960	35448969
YEATS4	activation	chr1	35448729	35449708	ZIC2	chr1	35449099	35449112
YEATS4	activation	chr1	35448729	35449708	ZIC2	chr1	35449204	35449217
YEATS4	activation	chr1	35448729	35449708	ZIC3	chr1	35449205	35449219
YEATS4	activation	chr1	35448729	35449708	ETV4	chr1	35449240	35449249
YEATS4	activation	chr1	35448729	35449708	HES1	chr1	35449290	35449299
YEATS4	activation	chr1	35448729	35449708	KLF5	chr1	35449348	35449357
YEATS4	activation	chr1	35448729	35449708	ETV5	chr1	35449455	35449465
YEATS4	activation	chr1	35448729	35449708	ETS2	chr1	35449477	35449486
YEATS4	activation	chr1	35448729	35449708	ETV5	chr1	35449478	35449488
YEATS4	activation	chr1	35448729	35449708	TFAP2A	chr1	35449684	35449696
YEATS4	activation	chr1	35448729	35449708	KLF5	chr1	35449698	35449707
YEATS4	activation	chr1	35492303	35493788	GATA2	chr1	35492580	35492590
YEATS4	activation	chr1	35492303	35493788	GRHL2	chr1	35492587	35492598
YEATS4	activation	chr1	35492303	35493788	SALL1	chr1	35492599	35492609
YEATS4	activation	chr1	35492303	35493788	ZIC2	chr1	35492789	35492802
YEATS4	activation	chr1	35492303	35493788	MEIS2	chr1	35492795	35492802
YEATS4	activation	chr1	35492303	35493788	IRF7	chr1	35492862	35492875
YEATS4	activation	chr1	35492303	35493788	ELF1	chr1	35492920	35492933
YEATS4	activation	chr1	35492303	35493788	ETV4	chr1	35492922	35492931
YEATS4	activation	chr1	35492303	35493788	SALL1	chr1	35493087	35493094
YEATS4	activation	chr1	35492303	35493788	RREB1	chr1	35493127	35493146
YEATS4	activation	chr1	35492303	35493788	SOX3	chr1	35493138	35493147
YEATS4	activation	chr1	35492303	35493788	CDX2	chr1	35493359	35493370
YEATS4	activation	chr1	35492303	35493788	SNAI1	chr1	35493446	35493455
YEATS4	activation	chr1	35492303	35493788	TCF7L2	chr1	35493643	35493656
YEATS4	activation	chr1	35492303	35493788	CDX2	chr1	35493774	35493785
YEATS4	repression_index_4	chr1	35521298	35521509	KLF5	chr1	35521333	35521342
YEATS4	repression_index_4	chr1	35521298	35521509	TFAP2A	chr1	35521410	35521423
YEATS4	activation	chr1	35544028	35544427	MYC	chr1	35544037	35544048
YEATS4	activation	chr1	35544028	35544427	TCF12	chr1	35544143	35544153
YEATS4	activation	chr1	35544028	35544427	TBX3	chr1	35544379	35544388
CSRP2	activation	chr1	38259636	38260398	TCF12	chr1	38259810	38259820
CSRP2	activation	chr1	38259636	38260398	SNAI1	chr1	38259811	38259820
CSRP2	activation	chr1	38259636	38260398	TCF12	chr1	38259811	38259821
CSRP2	activation	chr1	38259636	38260398	ETV5	chr1	38259854	38259864
CSRP2	activation	chr1	38259636	38260398	ELF1	chr1	38259881	38259894
CSRP2	activation	chr1	38259636	38260398	ZIC2	chr1	38259885	38259898
CSRP2	activation	chr1	38259636	38260398	PITX2	chr1	38259931	38259938
CSRP2	activation	chr1	38259636	38260398	GATA2	chr1	38259962	38259972
CSRP2	activation	chr1	38259636	38260398	TFAP2A	chr1	38260023	38260034
CSRP2	activation	chr1	38259636	38260398	DLX5	chr1	38260213	38260220
CSRP2	activation	chr1	38259636	38260398	MSX1	chr1	38260213	38260220
CSRP2	activation	chr1	38259636	38260398	TFAP2A	chr1	38260275	38260287
CSRP2	activation	chr1	38288949	38289266	TCF7L1	chr1	38288960	38288971
CSRP2	activation	chr1	38288949	38289266	TCF7L2	chr1	38288960	38288973
CSRP2	activation	chr1	38288949	38289266	TBX3	chr1	38288990	38288999
CSRP2	activation	chr1	38288949	38289266	MGA	chr1	38288991	38288998
CSRP2	activation	chr1	38308186	38309877	ZNF821	chr1	38308223	38308237
CSRP2	activation	chr1	38308186	38309877	KLF6	chr1	38308303	38308313
CSRP2	activation	chr1	38308186	38309877	KLF5	chr1	38308304	38308313
CSRP2	activation	chr1	38308186	38309877	TBX3	chr1	38308304	38308313
CSRP2	activation	chr1	38308186	38309877	ZIC2	chr1	38308404	38308417
CSRP2	activation	chr1	38308186	38309877	SNAI1	chr1	38308459	38308468
CSRP2	activation	chr1	38308186	38309877	TCF12	chr1	38308459	38308469
CSRP2	activation	chr1	38308186	38309877	ZIC2	chr1	38308468	38308481
CSRP2	activation	chr1	38308186	38309877	TCF12	chr1	38308513	38308523
CSRP2	activation	chr1	38308186	38309877	MAFA	chr1	38308640	38308654
CSRP2	activation	chr1	38308186	38309877	TFAP2A	chr1	38308653	38308666
CSRP2	activation	chr1	38308186	38309877	TFAP2A	chr1	38308654	38308665
CSRP2	activation	chr1	38308186	38309877	TCF12	chr1	38308657	38308667
CSRP2	activation	chr1	38308186	38309877	TFAP2A	chr1	38308747	38308758
CSRP2	activation	chr1	38308186	38309877	KLF6	chr1	38308772	38308782
CSRP2	activation	chr1	38308186	38309877	KLF5	chr1	38308773	38308782
CSRP2	activation	chr1	38308186	38309877	MEIS2	chr1	38308785	38308792
CSRP2	activation	chr1	38308186	38309877	TCF12	chr1	38308798	38308808
CSRP2	activation	chr1	38308186	38309877	SNAI1	chr1	38308799	38308808
CSRP2	activation	chr1	38308186	38309877	KLF6	chr1	38308809	38308819
CSRP2	activation	chr1	38308186	38309877	TFAP2A	chr1	38308814	38308825
CSRP2	activation	chr1	38308186	38309877	TFAP2A	chr1	38308883	38308895
CSRP2	activation	chr1	38308186	38309877	TFAP2A	chr1	38308913	38308926
CSRP2	activation	chr1	38308186	38309877	TFAP2A	chr1	38308993	38309006
CSRP2	activation	chr1	38308186	38309877	TFAP2A	chr1	38308994	38309005
CSRP2	activation	chr1	38308186	38309877	TFAP2A	chr1	38308994	38309006
CSRP2	activation	chr1	38308186	38309877	ZIC2	chr1	38309025	38309038
CSRP2	activation	chr1	38308186	38309877	ZIC3	chr1	38309026	38309040
CSRP2	activation	chr1	38308186	38309877	TCF12	chr1	38309029	38309039
CSRP2	activation	chr1	38308186	38309877	TFAP2A	chr1	38309116	38309127
CSRP2	activation	chr1	38308186	38309877	TFAP2A	chr1	38309146	38309157
CSRP2	activation	chr1	38308186	38309877	TFAP2A	chr1	38309187	38309199
CSRP2	activation	chr1	38308186	38309877	TFAP2A	chr1	38309210	38309221
CSRP2	activation	chr1	38308186	38309877	HES1	chr1	38309240	38309249
CSRP2	activation	chr1	38308186	38309877	KLF5	chr1	38309327	38309336
CSRP2	activation	chr1	38308186	38309877	KLF5	chr1	38309336	38309345
CSRP2	activation	chr1	38308186	38309877	TFAP2A	chr1	38309356	38309368
CSRP2	activation	chr1	38308186	38309877	TFAP2A	chr1	38309364	38309375
CSRP2	activation	chr1	38308186	38309877	ZIC2	chr1	38309380	38309393
CSRP2	activation	chr1	38308186	38309877	ETV5	chr1	38309405	38309415
CSRP2	activation	chr1	38308186	38309877	TCF12	chr1	38309415	38309425
CSRP2	activation	chr1	38308186	38309877	SOX3	chr1	38309454	38309463
CSRP2	activation	chr1	38308186	38309877	MEIS2	chr1	38309494	38309501
CSRP2	activation	chr1	38308186	38309877	ZIC3	chr1	38309648	38309662
CSRP2	activation	chr1	38308186	38309877	BHLHE40	chr1	38309705	38309714
CSRP2	activation	chr1	38308186	38309877	HEY1	chr1	38309705	38309714
CSRP2	activation	chr1	38308186	38309877	FOXA2	chr1	38309772	38309782
ATF7IP	repression_index_4	chr1	48818952	48819480	EOMES	chr1	48819016	48819028
ATF7IP	repression_index_4	chr1	48818952	48819480	SALL1	chr1	48819196	48819206
ATF7IP	repression_index_4	chr1	48818952	48819480	HOXA1	chr1	48819299	48819306
ATF7IP	repression_index_4	chr1	48818952	48819480	LMX1B	chr1	48819299	48819309
ATF7IP	activation	chr1	48860278	48860813	ZIC3	chr1	48860323	48860337
ATF7IP	activation	chr1	48860278	48860813	GBX2	chr1	48860438	48860447
ATF7IP	activation	chr1	48860278	48860813	HESX1	chr1	48860438	48860447
ATF7IP	activation	chr1	48860278	48860813	HOXA1	chr1	48860439	48860446
ATF7IP	activation	chr1	48874806	48875607	TCF12	chr1	48874976	48874986
ATF7IP	activation	chr1	48874806	48875607	SNAI1	chr1	48874977	48874986
ATF7IP	activation	chr1	48874806	48875607	SOX4	chr1	48874994	48875003
ATF7IP	activation	chr1	48874806	48875607	SOX3	chr1	48874995	48875004
ATF7IP	activation	chr1	48874806	48875607	KLF5	chr1	48875272	48875281
ATF7IP	activation	chr1	48874806	48875607	SOX4	chr1	48875369	48875378
ATF7IP	activation	chr1	48874806	48875607	TCF7L2	chr1	48875428	48875441
ATF7IP	activation	chr1	48874806	48875607	KLF5	chr1	48875499	48875508
ATF7IP	activation	chr1	48874806	48875607	SOX3	chr1	48875584	48875593
ATF7IP	activation	chr1	48929196	48930716	MEIS2	chr1	48929281	48929288
ATF7IP	activation	chr1	48929196	48930716	ELF1	chr1	48929325	48929338
ATF7IP	activation	chr1	48929196	48930716	ETV4	chr1	48929327	48929336
ATF7IP	activation	chr1	48929196	48930716	LHX5	chr1	48929451	48929458
ATF7IP	activation	chr1	48929196	48930716	GATA2	chr1	48929519	48929529
ATF7IP	activation	chr1	48929196	48930716	MYC	chr1	48929592	48929603
ATF7IP	activation	chr1	48929196	48930716	MYCN	chr1	48929592	48929603
ATF7IP	activation	chr1	48929196	48930716	HES1	chr1	48929593	48929602
ATF7IP	activation	chr1	48929196	48930716	HEY1	chr1	48929593	48929602
ATF7IP	activation	chr1	48929196	48930716	BACH1	chr1	48929597	48929609
ATF7IP	activation	chr1	48929196	48930716	TCF12	chr1	48929684	48929694
ATF7IP	activation	chr1	48929196	48930716	SOX4	chr1	48929707	48929716
ATF7IP	activation	chr1	48929196	48930716	TCF12	chr1	48929722	48929732
ATF7IP	activation	chr1	48929196	48930716	SNAI1	chr1	48929723	48929732
ATF7IP	activation	chr1	48929196	48930716	TCF12	chr1	48929723	48929733
ATF7IP	activation	chr1	48929196	48930716	ZIC2	chr1	48929724	48929737
ATF7IP	activation	chr1	48929196	48930716	ZIC2	chr1	48929785	48929798
ATF7IP	activation	chr1	48929196	48930716	ZIC2	chr1	48929800	48929813
ATF7IP	activation	chr1	48929196	48930716	FOXA2	chr1	48929833	48929843
ATF7IP	activation	chr1	48929196	48930716	CDX2	chr1	48929851	48929862
ATF7IP	activation	chr1	48929196	48930716	TFAP2A	chr1	48929974	48929986
ATF7IP	activation	chr1	48929196	48930716	CDX2	chr1	48930092	48930103
ATF7IP	activation	chr1	48929196	48930716	MYCN	chr1	48930370	48930381
ATF7IP	activation	chr1	48929196	48930716	TFAP2A	chr1	48930370	48930382
ATF7IP	activation	chr1	48929196	48930716	KLF5	chr1	48930486	48930495
ATF7IP	activation	chr1	48929196	48930716	MEIS2	chr1	48930546	48930553
ATF7IP	activation	chr1	48929196	48930716	TCF12	chr1	48930554	48930564
ATF7IP	activation	chr1	48929196	48930716	SNAI1	chr1	48930555	48930564
ATF7IP	activation	chr1	48929196	48930716	TCF12	chr1	48930555	48930565
ATF7IP	activation	chr1	48929196	48930716	ZIC2	chr1	48930628	48930641
ATF7IP	activation	chr1	48929196	48930716	ZIC2	chr1	48930641	48930654
ATF7IP	activation	chr1	48932478	48933726	ZIC2	chr1	48932707	48932720
ATF7IP	activation	chr1	48932478	48933726	GRHL1	chr1	48932751	48932762
ATF7IP	activation	chr1	48932478	48933726	GRHL2	chr1	48932751	48932762
ATF7IP	activation	chr1	48932478	48933726	GRHL3	chr1	48932751	48932762
ATF7IP	activation	chr1	48932478	48933726	TFAP2A	chr1	48932850	48932863
ATF7IP	activation	chr1	48932478	48933726	TCF12	chr1	48932873	48932883
ATF7IP	activation	chr1	48932478	48933726	TFAP2A	chr1	48932896	48932909
ATF7IP	activation	chr1	48932478	48933726	ZIC3	chr1	48932927	48932941
ATF7IP	activation	chr1	48932478	48933726	ZIC2	chr1	48932929	48932942
ATF7IP	activation	chr1	48932478	48933726	ELF1	chr1	48932972	48932985
ATF7IP	activation	chr1	48935049	48938274	TCF12	chr1	48935114	48935124
ATF7IP	activation	chr1	48935049	48938274	SOX3	chr1	48935387	48935396
ATF7IP	activation	chr1	48935049	48938274	SOX4	chr1	48935388	48935397
ATF7IP	activation	chr1	48935049	48938274	FOXA2	chr1	48935697	48935707
ATF7IP	activation	chr1	48935049	48938274	TCF7L2	chr1	48935707	48935720
ATF7IP	activation	chr1	48935049	48938274	GATA2	chr1	48935768	48935778
ATF7IP	activation	chr1	48935049	48938274	MYC	chr1	48935790	48935801
ATF7IP	activation	chr1	48935049	48938274	BHLHE40	chr1	48935791	48935800
ATF7IP	activation	chr1	48935049	48938274	HES1	chr1	48935791	48935800
ATF7IP	activation	chr1	48935049	48938274	HEY1	chr1	48935791	48935800
ATF7IP	activation	chr1	48935049	48938274	FOXA2	chr1	48935826	48935836
ATF7IP	activation	chr1	48935049	48938274	SALL1	chr1	48935839	48935846
ATF7IP	activation	chr1	48935049	48938274	EOMES	chr1	48936004	48936016
ATF7IP	activation	chr1	48935049	48938274	SIX3	chr1	48936240	48936256
ATF7IP	activation	chr1	48935049	48938274	TFAP2A	chr1	48936309	48936322
ATF7IP	activation	chr1	48935049	48938274	TFAP2A	chr1	48936310	48936323
ATF7IP	activation	chr1	48935049	48938274	TFAP2A	chr1	48936310	48936321
ATF7IP	activation	chr1	48935049	48938274	SOX3	chr1	48936355	48936364
ATF7IP	activation	chr1	48935049	48938274	SOX4	chr1	48936356	48936365
ATF7IP	activation	chr1	48935049	48938274	SIX3	chr1	48936409	48936425
ATF7IP	activation	chr1	48935049	48938274	ELF1	chr1	48936581	48936594
ATF7IP	activation	chr1	48935049	48938274	ETV4	chr1	48936583	48936592
ATF7IP	activation	chr1	48935049	48938274	HESX1	chr1	48936726	48936735
ATF7IP	activation	chr1	48935049	48938274	LHX5	chr1	48936727	48936734
ATF7IP	activation	chr1	48935049	48938274	TCF12	chr1	48936845	48936855
ATF7IP	activation	chr1	48935049	48938274	TCF12	chr1	48936846	48936856
ATF7IP	activation	chr1	48935049	48938274	HIC2	chr1	48937005	48937013
ATF7IP	activation	chr1	48935049	48938274	TCF12	chr1	48937085	48937095
ATF7IP	activation	chr1	48935049	48938274	TCF12	chr1	48937086	48937096
ATF7IP	activation	chr1	48935049	48938274	CDX2	chr1	48937147	48937158
ATF7IP	activation	chr1	48935049	48938274	SOX3	chr1	48937353	48937362
ATF7IP	activation	chr1	48935049	48938274	MEIS2	chr1	48937417	48937424
ATF7IP	activation	chr1	48935049	48938274	TCF12	chr1	48937838	48937848
ATF7IP	activation	chr1	48935049	48938274	TCF12	chr1	48937839	48937849
ATF7IP	activation	chr1	48935049	48938274	ZIC2	chr1	48937872	48937885
ATF7IP	activation	chr1	48935049	48938274	BACH1	chr1	48937945	48937957
ATF7IP	activation	chr1	48935049	48938274	TCF12	chr1	48938082	48938092
ATF7IP	activation	chr1	48935049	48938274	SNAI1	chr1	48938083	48938092
ATF7IP	activation	chr1	48935049	48938274	PITX2	chr1	48938113	48938120
ATF7IP	activation	chr1	48935049	48938274	SALL1	chr1	48938128	48938135
ATF7IP	activation	chr1	48935049	48938274	MYC	chr1	48938130	48938141
ATF7IP	activation	chr1	48935049	48938274	BHLHE40	chr1	48938131	48938140
ATF7IP	activation	chr1	48946133	48946352	SALL1	chr1	48946157	48946167
ATF7IP	activation	chr1	48946133	48946352	KLF5	chr1	48946324	48946333
ATF7IP	activation	chr1	48965980	48967224	TCF12	chr1	48966239	48966249
ATF7IP	activation	chr1	48965980	48967224	TFAP2A	chr1	48966269	48966280
ATF7IP	activation	chr1	48965980	48967224	TCF12	chr1	48966364	48966374
ATF7IP	activation	chr1	48965980	48967224	SNAI1	chr1	48966365	48966374
ATF7IP	activation	chr1	48965980	48967224	TCF12	chr1	48966365	48966375
ATF7IP	activation	chr1	48965980	48967224	ZIC3	chr1	48966539	48966553
ATF7IP	activation	chr1	48965980	48967224	ZIC2	chr1	48966566	48966579
ATF7IP	activation	chr1	48965980	48967224	MYC	chr1	48966581	48966592
ATF7IP	activation	chr1	48965980	48967224	ZIC2	chr1	48966583	48966596
ATF7IP	activation	chr1	48965980	48967224	NFKB2	chr1	48966613	48966625
ATF7IP	activation	chr1	48965980	48967224	ZIC3	chr1	48966617	48966631
ATF7IP	activation	chr1	48965980	48967224	ELF1	chr1	48966646	48966659
ATF7IP	activation	chr1	48965980	48967224	ETV4	chr1	48966648	48966657
ATF7IP	activation	chr1	48965980	48967224	KLF5	chr1	48966682	48966691
ATF7IP	activation	chr1	48965980	48967224	MYCN	chr1	48966695	48966706
ATF7IP	activation	chr1	48965980	48967224	TFAP2A	chr1	48966706	48966717
ATF7IP	activation	chr1	48965980	48967224	MYCN	chr1	48966750	48966761
ATF7IP	activation	chr1	48965980	48967224	TFAP2A	chr1	48966750	48966762
ATF7IP	activation	chr1	48965980	48967224	TFAP2A	chr1	48966775	48966787
ATF7IP	activation	chr1	48965980	48967224	TBX3	chr1	48966821	48966830
ATF7IP	activation	chr1	48965980	48967224	KLF6	chr1	48966840	48966850
ATF7IP	activation	chr1	48965980	48967224	ZIC2	chr1	48966903	48966916
ATF7IP	activation	chr1	48965980	48967224	TFAP2A	chr1	48966997	48967010
ATF7IP	activation	chr1	48965980	48967224	TFAP2A	chr1	48966997	48967008
ATF7IP	activation	chr1	48965980	48967224	ELF1	chr1	48967091	48967104
ATF7IP	activation	chr1	48965980	48967224	ETV4	chr1	48967093	48967102
ATF7IP	activation	chr1	49000402	49001294	TCF12	chr1	49000512	49000522
ATF7IP	activation	chr1	49000402	49001294	MAFA	chr1	49000515	49000529
ATF7IP	activation	chr1	49000402	49001294	TCF7L1	chr1	49000583	49000594
ATF7IP	activation	chr1	49000402	49001294	SALL1	chr1	49000629	49000639
ATF7IP	activation	chr1	49000402	49001294	ESRRG	chr1	49000676	49000685
ATF7IP	activation	chr1	49000402	49001294	ETV4	chr1	49000688	49000697
ATF7IP	activation	chr1	49000402	49001294	OTX2	chr1	49000884	49000895
ATF7IP	activation	chr1	49000402	49001294	HIC2	chr1	49000906	49000914
ATF7IP	activation	chr1	49000402	49001294	TBX3	chr1	49000910	49000919
ATF7IP	activation	chr1	49000402	49001294	ZIC2	chr1	49001163	49001176
ATF7IP	activation	chr1	49025945	49027112	TBX3	chr1	49026035	49026044
ATF7IP	activation	chr1	49025945	49027112	MGA	chr1	49026036	49026043
ATF7IP	activation	chr1	49025945	49027112	HIC2	chr1	49026055	49026063
ATF7IP	activation	chr1	49025945	49027112	HIC2	chr1	49026076	49026084
ATF7IP	activation	chr1	49025945	49027112	ZIC2	chr1	49026093	49026106
ATF7IP	activation	chr1	49025945	49027112	MGA	chr1	49026116	49026123
ATF7IP	activation	chr1	49025945	49027112	TFAP2A	chr1	49026134	49026145
ATF7IP	activation	chr1	49025945	49027112	TCF7L2	chr1	49026241	49026254
ATF7IP	activation	chr1	49025945	49027112	TFAP2A	chr1	49026358	49026371
ATF7IP	activation	chr1	49025945	49027112	KLF6	chr1	49026395	49026405
ATF7IP	activation	chr1	49025945	49027112	ETV5	chr1	49026455	49026465
ATF7IP	activation	chr1	49025945	49027112	TFAP2A	chr1	49026623	49026635
ATF7IP	activation	chr1	49025945	49027112	TFAP2A	chr1	49026758	49026771
ATF7IP	activation	chr1	49025945	49027112	ZIC2	chr1	49026758	49026771
ATF7IP	activation	chr1	49025945	49027112	TFAP2A	chr1	49026760	49026771
ATF7IP	activation	chr1	49025945	49027112	TFAP2A	chr1	49026760	49026772
ATF7IP	activation	chr1	49025945	49027112	ETV4	chr1	49026778	49026787
ATF7IP	activation	chr1	49025945	49027112	SOX3	chr1	49026781	49026790
ATF7IP	activation	chr1	49025945	49027112	ZIC2	chr1	49026800	49026813
ATF7IP	activation	chr1	49025945	49027112	TCF12	chr1	49026802	49026812
ATF7IP	activation	chr1	49025945	49027112	MEIS2	chr1	49027002	49027009
ATF7IP	activation	chr1	49025945	49027112	MYC	chr1	49027044	49027055
ATF7IP	activation	chr1	49025945	49027112	HES1	chr1	49027045	49027054
ATF7IP	activation	chr1	49025945	49027112	ZIC2	chr1	49027055	49027068
ATF7IP	activation	chr1	49078099	49078367	SALL1	chr1	49078192	49078199
ATF7IP	activation	chr1	49078099	49078367	GRHL1	chr1	49078206	49078217
ATF7IP	activation	chr1	49078099	49078367	ESRRG	chr1	49078255	49078264
ATF7IP	activation	chr1	49083437	49085320	TCF12	chr1	49083447	49083457
ATF7IP	activation	chr1	49083437	49085320	TCF12	chr1	49083448	49083458
ATF7IP	activation	chr1	49083437	49085320	SOX3	chr1	49083480	49083489
ATF7IP	activation	chr1	49083437	49085320	SOX4	chr1	49083481	49083490
ATF7IP	activation	chr1	49083437	49085320	TCF12	chr1	49083519	49083529
ATF7IP	activation	chr1	49083437	49085320	SNAI1	chr1	49083520	49083529
ATF7IP	activation	chr1	49083437	49085320	ZNF821	chr1	49083610	49083624
ATF7IP	activation	chr1	49083437	49085320	EOMES	chr1	49083684	49083696
ATF7IP	activation	chr1	49083437	49085320	TBX3	chr1	49083687	49083696
ATF7IP	activation	chr1	49083437	49085320	MGA	chr1	49083688	49083695
ATF7IP	activation	chr1	49083437	49085320	EOMES	chr1	49083892	49083904
ATF7IP	activation	chr1	49083437	49085320	TBX3	chr1	49083895	49083904
ATF7IP	activation	chr1	49083437	49085320	MGA	chr1	49083896	49083903
ATF7IP	activation	chr1	49083437	49085320	KLF5	chr1	49083920	49083929
ATF7IP	activation	chr1	49083437	49085320	ZIC2	chr1	49083946	49083959
ATF7IP	activation	chr1	49083437	49085320	NFKB2	chr1	49083953	49083965
ATF7IP	activation	chr1	49083437	49085320	TFAP2A	chr1	49083959	49083972
ATF7IP	activation	chr1	49083437	49085320	TFAP2A	chr1	49083960	49083972
ATF7IP	activation	chr1	49083437	49085320	TFAP2A	chr1	49083960	49083973
ATF7IP	activation	chr1	49083437	49085320	TFAP2A	chr1	49083961	49083972
ATF7IP	activation	chr1	49083437	49085320	ZIC3	chr1	49084020	49084034
ATF7IP	activation	chr1	49083437	49085320	KLF5	chr1	49084029	49084038
ATF7IP	activation	chr1	49083437	49085320	HES1	chr1	49084075	49084084
ATF7IP	activation	chr1	49083437	49085320	HEY1	chr1	49084075	49084084
ATF7IP	activation	chr1	49083437	49085320	TFAP2A	chr1	49084147	49084158
ATF7IP	activation	chr1	49083437	49085320	KLF6	chr1	49084201	49084211
ATF7IP	activation	chr1	49083437	49085320	TFAP2A	chr1	49084221	49084234
ATF7IP	activation	chr1	49083437	49085320	TFAP2A	chr1	49084223	49084234
ATF7IP	activation	chr1	49083437	49085320	BHLHE40	chr1	49084231	49084240
ATF7IP	activation	chr1	49083437	49085320	HES1	chr1	49084231	49084240
ATF7IP	activation	chr1	49083437	49085320	HEY1	chr1	49084231	49084240
ATF7IP	activation	chr1	49083437	49085320	TFAP2A	chr1	49084240	49084253
ATF7IP	activation	chr1	49083437	49085320	TFAP2A	chr1	49084242	49084253
ATF7IP	activation	chr1	49083437	49085320	E2F2	chr1	49084269	49084284
ATF7IP	activation	chr1	49083437	49085320	KLF5	chr1	49084337	49084346
ATF7IP	activation	chr1	49083437	49085320	KLF5	chr1	49084348	49084357
ATF7IP	activation	chr1	49083437	49085320	KLF5	chr1	49084361	49084370
ATF7IP	activation	chr1	49083437	49085320	RREB1	chr1	49084414	49084433
ATF7IP	activation	chr1	49083437	49085320	KLF5	chr1	49084416	49084425
ATF7IP	activation	chr1	49083437	49085320	KLF6	chr1	49084416	49084426
ATF7IP	activation	chr1	49083437	49085320	RREB1	chr1	49084418	49084437
ATF7IP	activation	chr1	49083437	49085320	KLF5	chr1	49084424	49084433
ATF7IP	activation	chr1	49083437	49085320	KLF6	chr1	49084424	49084434
ATF7IP	activation	chr1	49083437	49085320	MEIS2	chr1	49084476	49084483
ATF7IP	activation	chr1	49083437	49085320	TFAP2A	chr1	49084634	49084646
ATF7IP	activation	chr1	49083437	49085320	MAFA	chr1	49084651	49084665
ATF7IP	activation	chr1	49083437	49085320	ZIC2	chr1	49084656	49084669
ATF7IP	activation	chr1	49083437	49085320	TFAP2A	chr1	49084667	49084679
ATF7IP	activation	chr1	49083437	49085320	TFAP2A	chr1	49084669	49084680
ATF7IP	activation	chr1	49083437	49085320	ZIC2	chr1	49084725	49084738
ATF7IP	activation	chr1	49083437	49085320	ZIC3	chr1	49084726	49084740
ATF7IP	activation	chr1	49083437	49085320	TFAP2A	chr1	49084762	49084773
ATF7IP	activation	chr1	49083437	49085320	ZIC2	chr1	49084824	49084837
ATF7IP	activation	chr1	49083437	49085320	KLF5	chr1	49084864	49084873
ATF7IP	activation	chr1	49083437	49085320	ETV4	chr1	49084873	49084882
ATF7IP	activation	chr1	49083437	49085320	KLF5	chr1	49084878	49084887
ATF7IP	activation	chr1	49083437	49085320	ETV5	chr1	49084886	49084896
ATF7IP	activation	chr1	49083437	49085320	MAFA	chr1	49084949	49084963
ATF7IP	activation	chr1	49083437	49085320	KLF5	chr1	49084967	49084976
ATF7IP	activation	chr1	49083437	49085320	SP4	chr1	49084968	49084984
ATF7IP	activation	chr1	49083437	49085320	KLF5	chr1	49084972	49084981
ATF7IP	activation	chr1	49083437	49085320	ZNF821	chr1	49085011	49085025
ATF7IP	activation	chr1	49083437	49085320	ELF1	chr1	49085022	49085035
ATF7IP	activation	chr1	49083437	49085320	ETV4	chr1	49085024	49085033
ATF7IP	activation	chr1	49083437	49085320	ZIC2	chr1	49085127	49085140
ATF7IP	activation	chr1	49083437	49085320	TCF12	chr1	49085131	49085141
ATF7IP	activation	chr1	49083437	49085320	SNAI1	chr1	49085132	49085141
ATF7IP	activation	chr1	49083437	49085320	TBX3	chr1	49085240	49085249
ATF7IP	activation	chr1	49083437	49085320	ETV4	chr1	49085287	49085296
MKL1	activation	chr1	49981879	49982598	ZIC3	chr1	49981884	49981898
MKL1	activation	chr1	49981879	49982598	TCF12	chr1	49981885	49981895
MKL1	activation	chr1	49981879	49982598	ZIC2	chr1	49981886	49981899
MKL1	activation	chr1	49981879	49982598	TCF12	chr1	49981897	49981907
MKL1	activation	chr1	49981879	49982598	HIF1A	chr1	49982031	49982040
MKL1	activation	chr1	49981879	49982598	MYC	chr1	49982031	49982042
MKL1	activation	chr1	49981879	49982598	BHLHE40	chr1	49982032	49982041
MKL1	activation	chr1	49981879	49982598	HEY1	chr1	49982032	49982041
MKL1	activation	chr1	49981879	49982598	HIF1A	chr1	49982033	49982042
MKL1	activation	chr1	49981879	49982598	ZIC2	chr1	49982088	49982101
MKL1	activation	chr1	49981879	49982598	ELF1	chr1	49982278	49982291
MKL1	activation	chr1	49981879	49982598	ETV5	chr1	49982279	49982289
MKL1	activation	chr1	49981879	49982598	ETV4	chr1	49982280	49982289
MKL1	activation	chr1	49981879	49982598	ELF1	chr1	49982286	49982299
MKL1	activation	chr1	49981879	49982598	ETV4	chr1	49982288	49982297
MKL1	activation	chr1	49981879	49982598	ETV5	chr1	49982288	49982298
MKL1	activation	chr1	49981879	49982598	MEIS2	chr1	49982583	49982597
MKL1	activation	chr1	49998386	49998837	KLF5	chr1	49998462	49998471
MKL1	activation	chr1	49998386	49998837	TFAP2A	chr1	49998471	49998482
MKL1	activation	chr1	49998386	49998837	SP4	chr1	49998555	49998571
MKL1	activation	chr1	49998386	49998837	RREB1	chr1	49998558	49998577
MKL1	activation	chr1	49998386	49998837	KLF5	chr1	49998559	49998568
MKL1	activation	chr1	49998386	49998837	KLF6	chr1	49998559	49998569
MKL1	activation	chr1	49998386	49998837	KLF5	chr1	49998564	49998573
MKL1	activation	chr1	49998386	49998837	KLF6	chr1	49998564	49998574
MKL1	activation	chr1	49998386	49998837	TFAP2A	chr1	49998589	49998602
MKL1	activation	chr1	49998386	49998837	TFAP2A	chr1	49998591	49998602
MKL1	activation	chr1	49998386	49998837	KLF6	chr1	49998617	49998627
MKL1	activation	chr1	49998386	49998837	KLF6	chr1	49998643	49998653
MKL1	activation	chr1	49998386	49998837	KLF5	chr1	49998644	49998653
MKL1	activation	chr1	49998386	49998837	TFAP2A	chr1	49998648	49998660
MKL1	activation	chr1	49998386	49998837	TFAP2A	chr1	49998680	49998692
MKL1	activation	chr1	49998386	49998837	TFAP2A	chr1	49998681	49998693
MKL1	activation	chr1	49998386	49998837	TFAP2A	chr1	49998681	49998692
MKL1	activation	chr1	49998386	49998837	ZIC3	chr1	49998681	49998695
MKL1	activation	chr1	49998386	49998837	TFAP2A	chr1	49998682	49998693
MKL1	activation	chr1	49998386	49998837	MEIS2	chr1	49998736	49998743
MKL1	repression_index_4	chr1	50031704	50034101	GRHL2	chr1	50031774	50031785
MKL1	repression_index_4	chr1	50031704	50034101	SOX3	chr1	50031857	50031866
MKL1	repression_index_4	chr1	50031704	50034101	MAFA	chr1	50032117	50032131
MKL1	repression_index_4	chr1	50031704	50034101	KLF5	chr1	50032152	50032161
MKL1	repression_index_4	chr1	50031704	50034101	BACH1	chr1	50032231	50032243
MKL1	repression_index_4	chr1	50031704	50034101	MYC	chr1	50032290	50032301
MKL1	repression_index_4	chr1	50031704	50034101	MYCN	chr1	50032290	50032301
MKL1	repression_index_4	chr1	50031704	50034101	KLF5	chr1	50032467	50032476
MKL1	repression_index_4	chr1	50031704	50034101	KLF5	chr1	50032509	50032518
MKL1	repression_index_4	chr1	50031704	50034101	SOX4	chr1	50032790	50032799
MKL1	repression_index_4	chr1	50031704	50034101	SOX3	chr1	50032791	50032800
MKL1	repression_index_4	chr1	50031704	50034101	GBX2	chr1	50032896	50032905
MKL1	repression_index_4	chr1	50031704	50034101	DLX5	chr1	50032897	50032904
MKL1	repression_index_4	chr1	50031704	50034101	MSX1	chr1	50032897	50032904
MKL1	repression_index_4	chr1	50031704	50034101	KLF5	chr1	50032928	50032937
MKL1	repression_index_4	chr1	50031704	50034101	CDX2	chr1	50032951	50032962
MKL1	repression_index_4	chr1	50031704	50034101	MEF2D	chr1	50032976	50032987
MKL1	repression_index_4	chr1	50031704	50034101	TFAP2A	chr1	50033097	50033110
MKL1	repression_index_4	chr1	50031704	50034101	TBX3	chr1	50033103	50033112
MKL1	repression_index_4	chr1	50031704	50034101	SALL1	chr1	50033217	50033224
MKL1	repression_index_4	chr1	50031704	50034101	TCF12	chr1	50033328	50033338
MKL1	repression_index_4	chr1	50031704	50034101	TCF12	chr1	50033347	50033357
MKL1	repression_index_4	chr1	50031704	50034101	BACH1	chr1	50033367	50033379
MKL1	repression_index_4	chr1	50031704	50034101	TCF7L2	chr1	50033413	50033426
MKL1	repression_index_4	chr1	50031704	50034101	ZIC2	chr1	50033744	50033757
MKL1	repression_index_4	chr1	50031704	50034101	SOX3	chr1	50033757	50033766
MKL1	repression_index_4	chr1	50031704	50034101	SOX4	chr1	50033758	50033767
MKL1	repression_index_4	chr1	50031704	50034101	TCF7L1	chr1	50033846	50033857
MKL1	repression_index_4	chr1	50036660	50037554	KLF5	chr1	50036677	50036686
MKL1	repression_index_4	chr1	50036660	50037554	ELF1	chr1	50036765	50036778
MKL1	repression_index_4	chr1	50036660	50037554	ETV5	chr1	50036766	50036776
MKL1	repression_index_4	chr1	50036660	50037554	ETV4	chr1	50036767	50036776
MKL1	repression_index_4	chr1	50036660	50037554	TFAP2A	chr1	50036827	50036840
MKL1	repression_index_4	chr1	50036660	50037554	TFAP2A	chr1	50036827	50036838
MKL1	repression_index_4	chr1	50036660	50037554	LMX1B	chr1	50036921	50036931
MKL1	repression_index_4	chr1	50036660	50037554	LHX5	chr1	50036924	50036931
MKL1	repression_index_4	chr1	50036660	50037554	GRHL2	chr1	50037021	50037032
MKL1	repression_index_4	chr1	50036660	50037554	GRHL3	chr1	50037021	50037032
MKL1	repression_index_4	chr1	50036660	50037554	CEBPB	chr1	50037130	50037139
MKL1	repression_index_4	chr1	50036660	50037554	BACH1	chr1	50037247	50037259
MKL1	repression_index_4	chr1	50036660	50037554	KLF5	chr1	50037331	50037340
MKL1	repression_index_4	chr1	50036660	50037554	SALL1	chr1	50037389	50037399
MKL1	repression_index_4	chr1	50036660	50037554	CDX2	chr1	50037391	50037402
MKL1	activation	chr1	50046057	50046681	MEF2D	chr1	50046083	50046094
MKL1	activation	chr1	50046057	50046681	CDX2	chr1	50046085	50046096
MKL1	activation	chr1	50046057	50046681	ETV4	chr1	50046110	50046119
MKL1	activation	chr1	50046057	50046681	GRHL2	chr1	50046206	50046217
MKL1	activation	chr1	50046057	50046681	GRHL3	chr1	50046206	50046217
MKL1	activation	chr1	50046057	50046681	BACH1	chr1	50046303	50046315
MKL1	activation	chr1	50046057	50046681	TCF7L1	chr1	50046402	50046413
MKL1	activation	chr1	50046057	50046681	ZIC3	chr1	50046541	50046555
MKL1	repression_index_4	chr1	50083718	50085092	TFAP2A	chr1	50084006	50084017
MKL1	repression_index_4	chr1	50083718	50085092	TCF12	chr1	50084019	50084029
MKL1	repression_index_4	chr1	50083718	50085092	TCF12	chr1	50084187	50084197
MKL1	repression_index_4	chr1	50083718	50085092	SOX13	chr1	50084244	50084254
MKL1	repression_index_4	chr1	50083718	50085092	TFAP2A	chr1	50084405	50084416
MKL1	repression_index_4	chr1	50083718	50085092	ZIC2	chr1	50084518	50084531
MKL1	repression_index_4	chr1	50083718	50085092	GRHL2	chr1	50084544	50084555
MKL1	repression_index_4	chr1	50083718	50085092	SNAI1	chr1	50084546	50084555
MKL1	repression_index_4	chr1	50083718	50085092	EOMES	chr1	50084548	50084560
MKL1	repression_index_4	chr1	50083718	50085092	TBX3	chr1	50084548	50084557
MKL1	repression_index_4	chr1	50083718	50085092	MGA	chr1	50084549	50084556
MKL1	repression_index_4	chr1	50083718	50085092	SOX3	chr1	50084558	50084567
MKL1	repression_index_4	chr1	50083718	50085092	MEIS2	chr1	50084625	50084639
MKL1	repression_index_4	chr1	50083718	50085092	HIF1A	chr1	50084733	50084742
MKL1	repression_index_4	chr1	50083718	50085092	ELF1	chr1	50084998	50085011
MKL1	repression_index_4	chr1	50083718	50085092	PITX2	chr1	50085015	50085022
MKL1	repression_index_4	chr1	50083718	50085092	ZNF821	chr1	50085053	50085067
MKL1	activation	chr1	50096605	50097964	TCF12	chr1	50096667	50096677
MKL1	activation	chr1	50096605	50097964	ETV5	chr1	50096763	50096773
MKL1	activation	chr1	50096605	50097964	TFAP2A	chr1	50096782	50096794
MKL1	activation	chr1	50096605	50097964	ZIC2	chr1	50096801	50096814
MKL1	activation	chr1	50096605	50097964	TFAP2A	chr1	50096904	50096915
MKL1	activation	chr1	50096605	50097964	SP4	chr1	50096962	50096978
MKL1	activation	chr1	50096605	50097964	SOX3	chr1	50096981	50096990
MKL1	activation	chr1	50096605	50097964	SOX4	chr1	50096982	50096991
MKL1	activation	chr1	50096605	50097964	FOXA2	chr1	50097019	50097029
MKL1	activation	chr1	50096605	50097964	TFAP2A	chr1	50097185	50097198
MKL1	activation	chr1	50096605	50097964	ZIC2	chr1	50097185	50097198
MKL1	activation	chr1	50096605	50097964	TFAP2A	chr1	50097187	50097198
MKL1	activation	chr1	50096605	50097964	MEIS2	chr1	50097336	50097343
MKL1	activation	chr1	50096605	50097964	SOX3	chr1	50097391	50097400
MKL1	activation	chr1	50096605	50097964	TFAP2A	chr1	50097404	50097415
MKL1	activation	chr1	50096605	50097964	TFAP2A	chr1	50097404	50097417
MKL1	activation	chr1	50096605	50097964	HIC2	chr1	50097615	50097623
MKL1	activation	chr1	50096605	50097964	SNAI1	chr1	50097661	50097670
MKL1	activation	chr1	50096605	50097964	TCF12	chr1	50097661	50097671
MKL1	activation	chr1	50096605	50097964	TCF7L2	chr1	50097689	50097702
MKL1	activation	chr1	50096605	50097964	TFAP2A	chr1	50097713	50097726
MKL1	activation	chr1	50096605	50097964	TBX3	chr1	50097724	50097733
MKL1	activation	chr1	50096605	50097964	TFAP2A	chr1	50097782	50097793
MKL1	activation	chr1	50096605	50097964	KLF5	chr1	50097820	50097829
MKL1	activation	chr1	50096605	50097964	HIC2	chr1	50097824	50097832
MKL1	activation	chr1	50096605	50097964	HES1	chr1	50097851	50097860
MKL1	activation	chr1	50096605	50097964	HEY1	chr1	50097851	50097860
MKL1	activation	chr1	50096605	50097964	TFAP2A	chr1	50097952	50097964
MKL1	activation	chr1	50096605	50097964	TFAP2A	chr1	50097952	50097963
MKL1	activation	chr1	50096605	50097964	TFAP2A	chr1	50097953	50097964
MKL1	activation	chr1	50105631	50106450	CDX2	chr1	50105659	50105670
MKL1	activation	chr1	50105631	50106450	KLF5	chr1	50105899	50105908
MKL1	activation	chr1	50105631	50106450	ELF1	chr1	50105947	50105960
MKL1	activation	chr1	50105631	50106450	ETV4	chr1	50105949	50105958
MKL1	activation	chr1	50105631	50106450	TCF12	chr1	50106004	50106014
MKL1	activation	chr1	50105631	50106450	SNAI1	chr1	50106036	50106045
MKL1	activation	chr1	50105631	50106450	ELF1	chr1	50106067	50106080
MKL1	activation	chr1	50105631	50106450	MEF2D	chr1	50106108	50106119
MKL1	activation	chr1	50105631	50106450	KLF5	chr1	50106207	50106216
MKL1	activation	chr1	50105631	50106450	SOX3	chr1	50106212	50106221
MKL1	activation	chr1	50105631	50106450	SOX4	chr1	50106213	50106222
MKL1	activation	chr1	50105631	50106450	ETV4	chr1	50106301	50106310
MKL1	activation	chr1	50105631	50106450	ZIC3	chr1	50106315	50106329
MKL1	activation	chr1	50105631	50106450	GRHL2	chr1	50106337	50106348
MKL1	activation	chr1	50105631	50106450	TFAP2A	chr1	50106372	50106383
MKL1	activation	chr1	50105631	50106450	TFAP2A	chr1	50106403	50106414
CBY1	activation	chr1	50880839	50881979	KLF5	chr1	50880867	50880876
CBY1	activation	chr1	50880839	50881979	KLF5	chr1	50880893	50880902
CBY1	activation	chr1	50880839	50881979	TCF12	chr1	50881110	50881120
CBY1	activation	chr1	50880839	50881979	TFAP2A	chr1	50881148	50881160
CBY1	activation	chr1	50880839	50881979	TFAP2A	chr1	50881148	50881159
CBY1	activation	chr1	50880839	50881979	TFAP2A	chr1	50881175	50881187
CBY1	activation	chr1	50880839	50881979	KLF6	chr1	50881192	50881202
CBY1	activation	chr1	50880839	50881979	TFAP2A	chr1	50881275	50881286
CBY1	activation	chr1	50880839	50881979	ETS2	chr1	50881368	50881377
CBY1	activation	chr1	50880839	50881979	ETV5	chr1	50881369	50881379
CBY1	activation	chr1	50880839	50881979	ELF1	chr1	50881373	50881386
CBY1	activation	chr1	50880839	50881979	ETS2	chr1	50881374	50881383
CBY1	activation	chr1	50880839	50881979	ETV5	chr1	50881375	50881385
CBY1	activation	chr1	50880839	50881979	ETV4	chr1	50881402	50881411
CBY1	activation	chr1	50880839	50881979	TFAP2A	chr1	50881425	50881437
CBY1	activation	chr1	50880839	50881979	TCF12	chr1	50881437	50881447
CBY1	activation	chr1	50880839	50881979	KLF6	chr1	50881444	50881454
CBY1	activation	chr1	50880839	50881979	KLF5	chr1	50881445	50881454
CBY1	activation	chr1	50880839	50881979	ELF1	chr1	50881929	50881942
CBY1	activation	chr1	50880839	50881979	ETV5	chr1	50881930	50881940
CBY1	activation	chr1	50880839	50881979	ETV4	chr1	50881931	50881940
CBY1	activation	chr1	50880839	50881979	TBX3	chr1	50881943	50881952
CBY1	activation	chr1	50880839	50881979	MGA	chr1	50881944	50881951
CBY1	activation	chr1	50883416	50884415	ZIC2	chr1	50883562	50883575
CBY1	activation	chr1	50883416	50884415	TFAP2A	chr1	50883649	50883662
CBY1	activation	chr1	50883416	50884415	TFAP2A	chr1	50883650	50883662
CBY1	activation	chr1	50883416	50884415	HIC2	chr1	50883679	50883687
CBY1	activation	chr1	50883416	50884415	TFAP2A	chr1	50883765	50883777
CBY1	activation	chr1	50883416	50884415	TCF12	chr1	50883843	50883853
CBY1	activation	chr1	50883416	50884415	HES1	chr1	50883888	50883897
CBY1	activation	chr1	50883416	50884415	HEY1	chr1	50883888	50883897
CBY1	activation	chr1	50883416	50884415	KLF5	chr1	50883950	50883959
CBY1	activation	chr1	50883416	50884415	MYC	chr1	50883971	50883982
CBY1	activation	chr1	50883416	50884415	TFAP2A	chr1	50883979	50883990
CBY1	activation	chr1	50883416	50884415	TFAP2A	chr1	50883999	50884011
CBY1	activation	chr1	50883416	50884415	TFAP2A	chr1	50883999	50884010
CBY1	activation	chr1	50883416	50884415	TFAP2A	chr1	50884000	50884012
CBY1	activation	chr1	50883416	50884415	ZIC3	chr1	50884000	50884014
CBY1	activation	chr1	50883416	50884415	RREB1	chr1	50884005	50884024
CBY1	activation	chr1	50883416	50884415	KLF5	chr1	50884009	50884018
CBY1	activation	chr1	50883416	50884415	KLF6	chr1	50884009	50884019
CBY1	activation	chr1	50883416	50884415	KLF5	chr1	50884015	50884024
CBY1	activation	chr1	50883416	50884415	KLF6	chr1	50884015	50884025
CBY1	activation	chr1	50883416	50884415	ZIC3	chr1	50884029	50884043
CBY1	activation	chr1	50883416	50884415	TCF12	chr1	50884083	50884093
HIPK2	activation	chr1	56075660	56076421	TFAP2A	chr1	56075702	56075714
HIPK2	activation	chr1	56075660	56076421	TFAP2A	chr1	56075710	56075721
HIPK2	activation	chr1	56075660	56076421	ZIC3	chr1	56075728	56075742
HIPK2	activation	chr1	56075660	56076421	KLF5	chr1	56075742	56075751
HIPK2	activation	chr1	56075660	56076421	KLF6	chr1	56075742	56075752
HIPK2	activation	chr1	56075660	56076421	RREB1	chr1	56075756	56075775
HIPK2	activation	chr1	56075660	56076421	KLF6	chr1	56075759	56075769
HIPK2	activation	chr1	56075660	56076421	KLF5	chr1	56075760	56075769
HIPK2	activation	chr1	56075660	56076421	TFAP2A	chr1	56075767	56075778
HIPK2	activation	chr1	56075660	56076421	ZIC3	chr1	56075799	56075813
HIPK2	activation	chr1	56075660	56076421	SOX13	chr1	56075843	56075853
HIPK2	activation	chr1	56075660	56076421	SOX4	chr1	56075843	56075852
HIPK2	activation	chr1	56075660	56076421	TCF12	chr1	56075870	56075880
HIPK2	activation	chr1	56075660	56076421	ZIC2	chr1	56075871	56075884
HIPK2	activation	chr1	56075660	56076421	TCF12	chr1	56075925	56075935
HIPK2	activation	chr1	56075660	56076421	KLF5	chr1	56075946	56075955
HIPK2	activation	chr1	56075660	56076421	KLF5	chr1	56075950	56075959
HIPK2	activation	chr1	56075660	56076421	KLF6	chr1	56075980	56075990
HIPK2	activation	chr1	56075660	56076421	TFAP2A	chr1	56075989	56076002
HIPK2	activation	chr1	56075660	56076421	TFAP2A	chr1	56076009	56076020
HIPK2	activation	chr1	56075660	56076421	MEIS2	chr1	56076024	56076031
HIPK2	activation	chr1	56075660	56076421	ZIC2	chr1	56076025	56076038
HIPK2	activation	chr1	56075660	56076421	TCF12	chr1	56076062	56076072
HIPK2	activation	chr1	56075660	56076421	GATA2	chr1	56076303	56076313
HIPK2	activation	chr1	56075660	56076421	TFAP2A	chr1	56076339	56076351
HIPK2	activation	chr1	56075660	56076421	TFAP2A	chr1	56076377	56076388
HIPK2	activation	chr1	56076750	56077844	KLF5	chr1	56076767	56076776
HIPK2	activation	chr1	56076750	56077844	TFAP2A	chr1	56076815	56076827
HIPK2	activation	chr1	56076750	56077844	TFAP2A	chr1	56076816	56076827
HIPK2	activation	chr1	56076750	56077844	RREB1	chr1	56076882	56076901
HIPK2	activation	chr1	56076750	56077844	KLF5	chr1	56076884	56076893
HIPK2	activation	chr1	56076750	56077844	PITX2	chr1	56076908	56076915
HIPK2	activation	chr1	56076750	56077844	TFAP2A	chr1	56076958	56076969
HIPK2	activation	chr1	56076750	56077844	TFAP2A	chr1	56076999	56077012
HIPK2	activation	chr1	56076750	56077844	TFAP2A	chr1	56077055	56077066
HIPK2	activation	chr1	56076750	56077844	TFAP2A	chr1	56077094	56077106
HIPK2	activation	chr1	56076750	56077844	TFAP2A	chr1	56077095	56077106
HIPK2	activation	chr1	56076750	56077844	HIF1A	chr1	56077294	56077303
HIPK2	activation	chr1	56076750	56077844	ZIC2	chr1	56077630	56077643
HIPK2	activation	chr1	56076750	56077844	TFAP2A	chr1	56077715	56077727
HIPK2	activation	chr1	56076750	56077844	TBX3	chr1	56077802	56077811
HIPK2	activation	chr1	56085233	56086815	NANOG	chr1	56085271	56085281
HIPK2	activation	chr1	56085233	56086815	SOX13	chr1	56085271	56085281
HIPK2	activation	chr1	56085233	56086815	SOX2	chr1	56085271	56085281
HIPK2	activation	chr1	56085233	56086815	NANOG	chr1	56085328	56085338
HIPK2	activation	chr1	56085233	56086815	SOX13	chr1	56085328	56085338
HIPK2	activation	chr1	56085233	56086815	SOX2	chr1	56085328	56085338
HIPK2	activation	chr1	56085233	56086815	SOX4	chr1	56085328	56085337
HIPK2	activation	chr1	56085233	56086815	ZIC2	chr1	56085393	56085406
HIPK2	activation	chr1	56085233	56086815	ESRRG	chr1	56085509	56085518
HIPK2	activation	chr1	56085233	56086815	MEIS2	chr1	56085528	56085535
HIPK2	activation	chr1	56085233	56086815	TFAP2A	chr1	56085634	56085645
HIPK2	activation	chr1	56085233	56086815	MEIS2	chr1	56085969	56085976
HIPK2	activation	chr1	56085233	56086815	TFAP2A	chr1	56086205	56086218
HIPK2	activation	chr1	56085233	56086815	TFAP2A	chr1	56086207	56086218
HIPK2	activation	chr1	56085233	56086815	SIX3	chr1	56086233	56086249
HIPK2	activation	chr1	56085233	56086815	ZNF423	chr1	56086453	56086467
HIPK2	activation	chr1	56085233	56086815	GATA2	chr1	56086501	56086511
HIPK2	activation	chr1	56085233	56086815	KLF5	chr1	56086717	56086726
HIPK2	activation	chr1	56085233	56086815	SOX4	chr1	56086722	56086731
HIPK2	activation	chr1	56085233	56086815	MEIS2	chr1	56086764	56086778
HIPK2	activation	chr1	56094398	56095162	KLF5	chr1	56094444	56094453
HIPK2	activation	chr1	56094398	56095162	TFAP2A	chr1	56094483	56094495
HIPK2	activation	chr1	56094398	56095162	MEIS2	chr1	56094743	56094750
HIPK2	activation	chr1	56094398	56095162	TFAP2A	chr1	56094755	56094768
HIPK2	activation	chr1	56094398	56095162	BACH1	chr1	56094775	56094787
HIPK2	activation	chr1	56094398	56095162	KLF5	chr1	56094786	56094795
HIPK2	activation	chr1	56094398	56095162	TCF12	chr1	56094792	56094802
HIPK2	activation	chr1	56094398	56095162	TCF12	chr1	56094793	56094803
HIPK2	activation	chr1	56094398	56095162	KLF5	chr1	56094801	56094810
HIPK2	activation	chr1	56094398	56095162	GRHL2	chr1	56094808	56094819
HIPK2	activation	chr1	56094398	56095162	SALL1	chr1	56095044	56095051
HIPK2	activation	chr1	56094398	56095162	ZIC2	chr1	56095069	56095082
HIPK2	activation	chr1	56094398	56095162	KLF5	chr1	56095146	56095155
HIPK2	activation	chr1	56121915	56123152	SOX3	chr1	56121986	56121995
HIPK2	activation	chr1	56121915	56123152	SOX4	chr1	56122003	56122012
HIPK2	activation	chr1	56121915	56123152	SOX3	chr1	56122004	56122013
HIPK2	activation	chr1	56121915	56123152	TCF12	chr1	56122011	56122021
HIPK2	activation	chr1	56121915	56123152	GATA2	chr1	56122018	56122028
HIPK2	activation	chr1	56121915	56123152	SNAI1	chr1	56122029	56122038
HIPK2	activation	chr1	56121915	56123152	TBX3	chr1	56122088	56122097
HIPK2	activation	chr1	56121915	56123152	ZIC2	chr1	56122106	56122119
HIPK2	activation	chr1	56121915	56123152	TCF12	chr1	56122110	56122120
HIPK2	activation	chr1	56121915	56123152	SNAI1	chr1	56122111	56122120
HIPK2	activation	chr1	56121915	56123152	ESRRG	chr1	56122144	56122153
HIPK2	activation	chr1	56121915	56123152	MAFA	chr1	56122198	56122212
HIPK2	activation	chr1	56121915	56123152	TFAP2A	chr1	56122229	56122240
HIPK2	activation	chr1	56121915	56123152	ELF1	chr1	56122254	56122267
HIPK2	activation	chr1	56121915	56123152	TFAP2A	chr1	56122378	56122391
HIPK2	activation	chr1	56121915	56123152	MYCN	chr1	56122397	56122408
HIPK2	activation	chr1	56121915	56123152	SOX3	chr1	56122467	56122476
HIPK2	activation	chr1	56121915	56123152	ZIC2	chr1	56122484	56122497
HIPK2	activation	chr1	56121915	56123152	MEIS2	chr1	56122524	56122531
HIPK2	activation	chr1	56121915	56123152	ELF1	chr1	56122532	56122545
HIPK2	activation	chr1	56121915	56123152	TCF7L2	chr1	56122556	56122569
HIPK2	activation	chr1	56121915	56123152	ZIC2	chr1	56122733	56122746
HIPK2	activation	chr1	56121915	56123152	SNAI1	chr1	56122809	56122818
HIPK2	activation	chr1	56121915	56123152	ZIC2	chr1	56122885	56122898
HIPK2	activation	chr1	56121915	56123152	TCF12	chr1	56122923	56122933
HIPK2	activation	chr1	56121915	56123152	TCF12	chr1	56122986	56122996
HIPK2	activation	chr1	56121915	56123152	KLF5	chr1	56123014	56123023
HIPK2	activation	chr1	56121915	56123152	ZNF821	chr1	56123039	56123053
HIPK2	activation	chr1	56121915	56123152	MEIS2	chr1	56123089	56123096
HIPK2	activation	chr1	56121915	56123152	NFKB2	chr1	56123121	56123133
HIPK2	activation	chr1	56121915	56123152	TFAP2A	chr1	56123127	56123139
HIPK2	repression_index_4	chr1	56141213	56141532	MGA	chr1	56141232	56141239
HIPK2	repression_index_4	chr1	56141213	56141532	SNAI1	chr1	56141241	56141250
HIPK2	repression_index_4	chr1	56141213	56141532	KLF5	chr1	56141395	56141404
HIPK2	activation	chr1	56147755	56149602	ELF1	chr1	56147761	56147774
HIPK2	activation	chr1	56147755	56149602	ETV4	chr1	56147763	56147772
HIPK2	activation	chr1	56147755	56149602	DLX5	chr1	56147772	56147779
HIPK2	activation	chr1	56147755	56149602	MSX1	chr1	56147772	56147779
HIPK2	activation	chr1	56147755	56149602	MEIS2	chr1	56148032	56148039
HIPK2	activation	chr1	56147755	56149602	SOX13	chr1	56148041	56148051
HIPK2	activation	chr1	56147755	56149602	SOX4	chr1	56148042	56148051
HIPK2	activation	chr1	56147755	56149602	EOMES	chr1	56148061	56148073
HIPK2	activation	chr1	56147755	56149602	TBX3	chr1	56148061	56148070
HIPK2	activation	chr1	56147755	56149602	MGA	chr1	56148062	56148069
HIPK2	activation	chr1	56147755	56149602	ELF1	chr1	56148232	56148245
HIPK2	activation	chr1	56147755	56149602	ETV4	chr1	56148234	56148243
HIPK2	activation	chr1	56147755	56149602	SALL1	chr1	56148282	56148289
HIPK2	activation	chr1	56147755	56149602	SP4	chr1	56148516	56148532
HIPK2	activation	chr1	56147755	56149602	KLF5	chr1	56148520	56148529
HIPK2	activation	chr1	56147755	56149602	TCF12	chr1	56148566	56148576
HIPK2	activation	chr1	56147755	56149602	TCF12	chr1	56148567	56148577
HIPK2	activation	chr1	56147755	56149602	TFAP2A	chr1	56148596	56148607
HIPK2	activation	chr1	56147755	56149602	MAFA	chr1	56148612	56148626
HIPK2	activation	chr1	56147755	56149602	SALL1	chr1	56148793	56148803
HIPK2	activation	chr1	56147755	56149602	SALL1	chr1	56148823	56148833
HIPK2	activation	chr1	56147755	56149602	TCF7L2	chr1	56148842	56148855
HIPK2	activation	chr1	56147755	56149602	HESX1	chr1	56148869	56148878
HIPK2	activation	chr1	56147755	56149602	MEIS2	chr1	56148869	56148883
HIPK2	activation	chr1	56147755	56149602	LHX5	chr1	56148870	56148877
HIPK2	activation	chr1	56147755	56149602	HES1	chr1	56149008	56149017
HIPK2	activation	chr1	56147755	56149602	SOX4	chr1	56149035	56149044
HIPK2	activation	chr1	56147755	56149602	SOX3	chr1	56149036	56149045
HIPK2	activation	chr1	56147755	56149602	FOXA2	chr1	56149052	56149062
HIPK2	activation	chr1	56147755	56149602	SALL1	chr1	56149056	56149066
HIPK2	activation	chr1	56147755	56149602	TCF12	chr1	56149109	56149119
HIPK2	activation	chr1	56147755	56149602	NANOG	chr1	56149177	56149187
HIPK2	activation	chr1	56147755	56149602	SOX13	chr1	56149177	56149187
HIPK2	activation	chr1	56147755	56149602	SOX2	chr1	56149177	56149187
HIPK2	activation	chr1	56147755	56149602	SOX4	chr1	56149178	56149187
HIPK2	activation	chr1	56147755	56149602	HIC2	chr1	56149276	56149284
HIPK2	activation	chr1	56147755	56149602	ZIC2	chr1	56149323	56149336
HIPK2	activation	chr1	56147755	56149602	ZIC2	chr1	56149400	56149413
HIPK2	activation	chr1	56147755	56149602	TCF12	chr1	56149402	56149412
HIPK2	activation	chr1	56147755	56149602	TFAP2A	chr1	56149440	56149453
HIPK2	activation	chr1	56147755	56149602	ETV4	chr1	56149464	56149473
HIPK2	activation	chr1	56155620	56155904	MEIS2	chr1	56155724	56155731
HIPK2	activation	chr1	56172429	56173056	TCF12	chr1	56172498	56172508
HIPK2	activation	chr1	56172429	56173056	ETS2	chr1	56172667	56172676
HIPK2	activation	chr1	56172429	56173056	ETV4	chr1	56172668	56172677
HIPK2	activation	chr1	56172429	56173056	GRHL1	chr1	56172720	56172731
HIPK2	activation	chr1	56172429	56173056	EOMES	chr1	56172781	56172793
HIPK2	activation	chr1	56172429	56173056	SOX4	chr1	56172907	56172916
HIPK2	activation	chr1	56172429	56173056	SALL1	chr1	56172933	56172940
HIPK2	repression_index_4	chr1	56191148	56194658	KLF6	chr1	56191266	56191276
HIPK2	repression_index_4	chr1	56191148	56194658	ZIC2	chr1	56191298	56191311
HIPK2	repression_index_4	chr1	56191148	56194658	SOX3	chr1	56191337	56191346
HIPK2	repression_index_4	chr1	56191148	56194658	MAFA	chr1	56191407	56191421
HIPK2	repression_index_4	chr1	56191148	56194658	TCF12	chr1	56191431	56191441
HIPK2	repression_index_4	chr1	56191148	56194658	ZIC2	chr1	56191585	56191598
HIPK2	repression_index_4	chr1	56191148	56194658	GBX2	chr1	56191683	56191692
HIPK2	repression_index_4	chr1	56191148	56194658	DLX5	chr1	56191684	56191691
HIPK2	repression_index_4	chr1	56191148	56194658	MSX1	chr1	56191684	56191691
HIPK2	repression_index_4	chr1	56191148	56194658	MAFA	chr1	56191802	56191816
HIPK2	repression_index_4	chr1	56191148	56194658	MAFA	chr1	56191931	56191945
HIPK2	repression_index_4	chr1	56191148	56194658	BACH1	chr1	56191931	56191943
HIPK2	repression_index_4	chr1	56191148	56194658	TCF7L2	chr1	56192092	56192105
HIPK2	repression_index_4	chr1	56191148	56194658	SALL1	chr1	56192111	56192118
HIPK2	repression_index_4	chr1	56191148	56194658	KLF5	chr1	56192112	56192121
HIPK2	repression_index_4	chr1	56191148	56194658	ZIC2	chr1	56192142	56192155
HIPK2	repression_index_4	chr1	56191148	56194658	TCF12	chr1	56192146	56192156
HIPK2	repression_index_4	chr1	56191148	56194658	SNAI1	chr1	56192147	56192156
HIPK2	repression_index_4	chr1	56191148	56194658	TCF12	chr1	56192147	56192157
HIPK2	repression_index_4	chr1	56191148	56194658	ETV4	chr1	56192219	56192228
HIPK2	repression_index_4	chr1	56191148	56194658	BACH1	chr1	56192291	56192303
HIPK2	repression_index_4	chr1	56191148	56194658	OTX2	chr1	56192320	56192331
HIPK2	repression_index_4	chr1	56191148	56194658	SOX3	chr1	56192501	56192510
HIPK2	repression_index_4	chr1	56191148	56194658	TCF12	chr1	56192602	56192612
HIPK2	repression_index_4	chr1	56191148	56194658	SALL1	chr1	56192656	56192666
HIPK2	repression_index_4	chr1	56191148	56194658	EOMES	chr1	56192664	56192676
HIPK2	repression_index_4	chr1	56191148	56194658	MGA	chr1	56192668	56192675
HIPK2	repression_index_4	chr1	56191148	56194658	GATA2	chr1	56192805	56192815
HIPK2	repression_index_4	chr1	56191148	56194658	SALL1	chr1	56193003	56193013
HIPK2	repression_index_4	chr1	56191148	56194658	CDX2	chr1	56193005	56193016
HIPK2	repression_index_4	chr1	56191148	56194658	TFAP2A	chr1	56193196	56193208
HIPK2	repression_index_4	chr1	56191148	56194658	CEBPB	chr1	56193229	56193238
HIPK2	repression_index_4	chr1	56191148	56194658	GRHL2	chr1	56193399	56193410
HIPK2	repression_index_4	chr1	56191148	56194658	GBX2	chr1	56193845	56193854
HIPK2	repression_index_4	chr1	56191148	56194658	HOXA1	chr1	56193846	56193853
HIPK2	repression_index_4	chr1	56191148	56194658	LHX5	chr1	56193846	56193853
HIPK2	repression_index_4	chr1	56191148	56194658	ELF1	chr1	56194009	56194022
HIPK2	repression_index_4	chr1	56191148	56194658	ETV4	chr1	56194011	56194020
HIPK2	repression_index_4	chr1	56191148	56194658	SOX3	chr1	56194039	56194048
HIPK2	repression_index_4	chr1	56191148	56194658	ELF1	chr1	56194063	56194076
HIPK2	repression_index_4	chr1	56191148	56194658	ETV4	chr1	56194065	56194074
HIPK2	repression_index_4	chr1	56191148	56194658	HOXA1	chr1	56194088	56194095
HIPK2	repression_index_4	chr1	56191148	56194658	LHX5	chr1	56194088	56194095
HIPK2	repression_index_4	chr1	56191148	56194658	TCF7L2	chr1	56194192	56194205
HIPK2	repression_index_4	chr1	56191148	56194658	HIC2	chr1	56194371	56194379
HIPK2	repression_index_4	chr1	56191148	56194658	SOX4	chr1	56194519	56194528
HIPK2	repression_index_4	chr1	56191148	56194658	MEIS2	chr1	56194577	56194591
HIPK2	repression_index_4	chr1	56191148	56194658	SALL1	chr1	56194618	56194625
HIPK2	activation	chr1	56202187	56202984	MYC	chr1	56202199	56202210
HIPK2	activation	chr1	56202187	56202984	MYCN	chr1	56202199	56202210
HIPK2	activation	chr1	56202187	56202984	HEY1	chr1	56202200	56202209
HIPK2	activation	chr1	56202187	56202984	KLF5	chr1	56202285	56202294
HIPK2	activation	chr1	56202187	56202984	KLF5	chr1	56202401	56202410
HIPK2	activation	chr1	56202187	56202984	TBX3	chr1	56202409	56202418
HIPK2	activation	chr1	56202187	56202984	MGA	chr1	56202410	56202417
HIPK2	activation	chr1	56202187	56202984	RREB1	chr1	56202582	56202601
HIPK2	activation	chr1	56202187	56202984	EOMES	chr1	56202666	56202678
HIPK2	activation	chr1	56202187	56202984	TBX3	chr1	56202666	56202675
HIPK2	activation	chr1	56202187	56202984	MGA	chr1	56202667	56202674
HIPK2	activation	chr1	56202187	56202984	ZIC2	chr1	56202800	56202813
HIPK2	activation	chr1	56202187	56202984	KLF5	chr1	56202827	56202836
HIPK2	activation	chr1	56202187	56202984	ZIC2	chr1	56202940	56202953
HIPK2	activation	chr1	56207256	56207586	KLF5	chr1	56207270	56207279
HIPK2	activation	chr1	56207256	56207586	KLF5	chr1	56207325	56207334
HIPK2	activation	chr1	56207256	56207586	EOMES	chr1	56207389	56207401
HIPK2	activation	chr1	56207256	56207586	KLF5	chr1	56207417	56207426
HIPK2	activation	chr1	56207256	56207586	NFKB2	chr1	56207420	56207432
HIPK2	activation	chr1	56207256	56207586	TFAP2A	chr1	56207498	56207509
TRIM24	activation	chr1	56401359	56404599	TCF7L2	chr1	56401568	56401581
TRIM24	activation	chr1	56401359	56404599	TCF7L2	chr1	56401686	56401699
TRIM24	activation	chr1	56401359	56404599	ETV4	chr1	56401879	56401888
TRIM24	activation	chr1	56401359	56404599	MEF2D	chr1	56401907	56401918
TRIM24	activation	chr1	56401359	56404599	HESX1	chr1	56401983	56401992
TRIM24	activation	chr1	56401359	56404599	LHX5	chr1	56401984	56401991
TRIM24	activation	chr1	56401359	56404599	LMX1B	chr1	56401984	56401994
TRIM24	activation	chr1	56401359	56404599	TCF7L2	chr1	56401991	56402004
TRIM24	activation	chr1	56401359	56404599	BACH1	chr1	56402080	56402092
TRIM24	activation	chr1	56401359	56404599	MAFA	chr1	56402080	56402094
TRIM24	activation	chr1	56401359	56404599	BACH1	chr1	56402082	56402094
TRIM24	activation	chr1	56401359	56404599	ETV4	chr1	56402144	56402153
TRIM24	activation	chr1	56401359	56404599	TCF7L1	chr1	56402336	56402347
TRIM24	activation	chr1	56401359	56404599	ESRRG	chr1	56402405	56402414
TRIM24	activation	chr1	56401359	56404599	SOX4	chr1	56402502	56402511
TRIM24	activation	chr1	56401359	56404599	TCF12	chr1	56402562	56402572
TRIM24	activation	chr1	56401359	56404599	MEIS2	chr1	56402898	56402905
TRIM24	activation	chr1	56401359	56404599	EOMES	chr1	56403722	56403734
TRIM24	activation	chr1	56401359	56404599	MEIS2	chr1	56403736	56403743
TRIM24	activation	chr1	56401359	56404599	MGA	chr1	56403886	56403893
TRIM24	activation	chr1	56401359	56404599	SOX3	chr1	56403958	56403967
TRIM24	activation	chr1	56401359	56404599	SOX3	chr1	56403991	56404000
TRIM24	activation	chr1	56401359	56404599	ETV4	chr1	56404088	56404097
TRIM24	activation	chr1	56401359	56404599	ESRRG	chr1	56404224	56404233
TRIM24	activation	chr1	56401359	56404599	TFAP2A	chr1	56404235	56404248
TRIM24	activation	chr1	56401359	56404599	BACH1	chr1	56404242	56404254
TRIM24	activation	chr1	56401359	56404599	ZIC2	chr1	56404297	56404310
TRIM24	activation	chr1	56404830	56406386	TFAP2A	chr1	56404947	56404960
TRIM24	activation	chr1	56404830	56406386	TFAP2A	chr1	56404948	56404961
TRIM24	activation	chr1	56404830	56406386	BHLHE40	chr1	56404981	56404990
TRIM24	activation	chr1	56404830	56406386	GATA2	chr1	56405146	56405156
TRIM24	activation	chr1	56404830	56406386	DLX5	chr1	56405321	56405328
TRIM24	activation	chr1	56404830	56406386	MSX1	chr1	56405321	56405328
TRIM24	activation	chr1	56404830	56406386	ETV4	chr1	56405354	56405363
TRIM24	activation	chr1	56404830	56406386	TFAP2A	chr1	56405372	56405383
TRIM24	activation	chr1	56404830	56406386	TFAP2A	chr1	56405598	56405611
TRIM24	activation	chr1	56404830	56406386	HIC2	chr1	56405699	56405707
TRIM24	activation	chr1	56404830	56406386	SOX3	chr1	56405716	56405725
TRIM24	activation	chr1	56404830	56406386	NFKB2	chr1	56405733	56405745
TRIM24	activation	chr1	56404830	56406386	SALL1	chr1	56405856	56405866
TRIM24	activation	chr1	56404830	56406386	GATA2	chr1	56405881	56405891
TRIM24	activation	chr1	56404830	56406386	TFAP2A	chr1	56405976	56405989
TRIM24	activation	chr1	56404830	56406386	TFAP2A	chr1	56405977	56405988
TRIM24	activation	chr1	56404830	56406386	MEIS2	chr1	56406029	56406036
TRIM24	activation	chr1	56404830	56406386	SOX13	chr1	56406080	56406090
TRIM24	activation	chr1	56404830	56406386	CEBPB	chr1	56406084	56406093
TRIM24	activation	chr1	56406591	56407888	TCF12	chr1	56406607	56406617
TRIM24	activation	chr1	56406591	56407888	NANOG	chr1	56406664	56406674
TRIM24	activation	chr1	56406591	56407888	SOX13	chr1	56406664	56406674
TRIM24	activation	chr1	56406591	56407888	SOX2	chr1	56406664	56406674
TRIM24	activation	chr1	56406591	56407888	SOX4	chr1	56406664	56406673
TRIM24	activation	chr1	56406591	56407888	KLF5	chr1	56406781	56406790
TRIM24	activation	chr1	56406591	56407888	MEIS2	chr1	56406836	56406843
TRIM24	activation	chr1	56406591	56407888	MAFA	chr1	56406886	56406900
TRIM24	activation	chr1	56406591	56407888	ETV5	chr1	56406949	56406959
TRIM24	activation	chr1	56406591	56407888	NANOG	chr1	56406976	56406986
TRIM24	activation	chr1	56406591	56407888	SOX13	chr1	56406976	56406986
TRIM24	activation	chr1	56406591	56407888	SOX2	chr1	56406976	56406986
TRIM24	activation	chr1	56406591	56407888	SOX4	chr1	56406976	56406985
TRIM24	activation	chr1	56406591	56407888	TCF12	chr1	56406994	56407004
TRIM24	activation	chr1	56406591	56407888	TCF12	chr1	56406995	56407005
TRIM24	activation	chr1	56406591	56407888	TCF12	chr1	56407104	56407114
TRIM24	activation	chr1	56406591	56407888	TFAP2A	chr1	56407155	56407167
TRIM24	activation	chr1	56406591	56407888	TFAP2A	chr1	56407225	56407237
TRIM24	activation	chr1	56406591	56407888	MAFA	chr1	56407468	56407482
TRIM24	activation	chr1	56406591	56407888	EOMES	chr1	56407547	56407559
TRIM24	activation	chr1	56406591	56407888	MGA	chr1	56407551	56407558
TRIM24	activation	chr1	56406591	56407888	TCF12	chr1	56407827	56407837
TRIM24	activation	chr1	56406591	56407888	SNAI1	chr1	56407828	56407837
TRIM24	activation	chr1	56406591	56407888	ETV4	chr1	56407869	56407878
TRIM24	activation	chr1	56408480	56410647	HIF1A	chr1	56408573	56408582
TRIM24	activation	chr1	56408480	56410647	FOXA2	chr1	56408612	56408622
TRIM24	activation	chr1	56408480	56410647	ZIC2	chr1	56408688	56408701
TRIM24	activation	chr1	56408480	56410647	TFAP2A	chr1	56408982	56408993
TRIM24	activation	chr1	56408480	56410647	MEIS2	chr1	56409039	56409046
TRIM24	activation	chr1	56408480	56410647	ZIC2	chr1	56409152	56409165
TRIM24	activation	chr1	56408480	56410647	ZIC2	chr1	56409236	56409249
TRIM24	activation	chr1	56408480	56410647	TCF12	chr1	56409237	56409247
TRIM24	activation	chr1	56408480	56410647	ETV4	chr1	56409408	56409417
TRIM24	activation	chr1	56408480	56410647	TCF12	chr1	56409421	56409431
TRIM24	activation	chr1	56408480	56410647	SNAI1	chr1	56409422	56409431
TRIM24	activation	chr1	56408480	56410647	SOX4	chr1	56409536	56409545
TRIM24	activation	chr1	56408480	56410647	SOX3	chr1	56409537	56409546
TRIM24	activation	chr1	56408480	56410647	MEIS2	chr1	56409554	56409568
TRIM24	activation	chr1	56408480	56410647	GRHL2	chr1	56409595	56409606
TRIM24	activation	chr1	56408480	56410647	ZIC2	chr1	56409666	56409679
TRIM24	activation	chr1	56408480	56410647	GRHL1	chr1	56409845	56409856
TRIM24	activation	chr1	56408480	56410647	GRHL2	chr1	56409845	56409856
TRIM24	activation	chr1	56408480	56410647	TCF12	chr1	56409867	56409877
TRIM24	activation	chr1	56408480	56410647	SNAI1	chr1	56409868	56409877
TRIM24	activation	chr1	56408480	56410647	EOMES	chr1	56409870	56409882
TRIM24	activation	chr1	56408480	56410647	TBX3	chr1	56409870	56409879
TRIM24	activation	chr1	56408480	56410647	FOXA2	chr1	56409888	56409898
TRIM24	activation	chr1	56408480	56410647	MEIS2	chr1	56410041	56410048
TRIM24	activation	chr1	56408480	56410647	TCF12	chr1	56410059	56410069
TRIM24	activation	chr1	56408480	56410647	TCF12	chr1	56410060	56410070
TRIM24	activation	chr1	56408480	56410647	KLF6	chr1	56410170	56410180
TRIM24	activation	chr1	56408480	56410647	SOX4	chr1	56410184	56410193
TRIM24	activation	chr1	56408480	56410647	SOX3	chr1	56410185	56410194
TRIM24	activation	chr1	56408480	56410647	TBX3	chr1	56410215	56410224
TRIM24	activation	chr1	56408480	56410647	MGA	chr1	56410216	56410223
TRIM24	activation	chr1	56408480	56410647	ELF1	chr1	56410255	56410268
TRIM24	activation	chr1	56408480	56410647	ETV4	chr1	56410257	56410266
TRIM24	activation	chr1	56408480	56410647	ETV5	chr1	56410257	56410267
TRIM24	activation	chr1	56408480	56410647	MAFA	chr1	56410264	56410278
TRIM24	activation	chr1	56408480	56410647	TFAP2A	chr1	56410627	56410640
TRIM24	activation	chr1	56410981	56415504	MEIS2	chr1	56411166	56411173
TRIM24	activation	chr1	56410981	56415504	EOMES	chr1	56411194	56411206
TRIM24	activation	chr1	56410981	56415504	MEIS2	chr1	56411249	56411256
TRIM24	activation	chr1	56410981	56415504	KLF5	chr1	56411301	56411310
TRIM24	activation	chr1	56410981	56415504	GATA2	chr1	56411385	56411395
TRIM24	activation	chr1	56410981	56415504	BACH1	chr1	56411440	56411452
TRIM24	activation	chr1	56410981	56415504	MAFA	chr1	56411440	56411454
TRIM24	activation	chr1	56410981	56415504	ELF1	chr1	56411485	56411498
TRIM24	activation	chr1	56410981	56415504	ETV4	chr1	56411487	56411496
TRIM24	activation	chr1	56410981	56415504	TFAP2A	chr1	56411563	56411576
TRIM24	activation	chr1	56410981	56415504	TFAP2A	chr1	56411564	56411575
TRIM24	activation	chr1	56410981	56415504	TFAP2A	chr1	56411564	56411577
TRIM24	activation	chr1	56410981	56415504	MAFA	chr1	56411581	56411595
TRIM24	activation	chr1	56410981	56415504	MEIS2	chr1	56411704	56411711
TRIM24	activation	chr1	56410981	56415504	TCF12	chr1	56411761	56411771
TRIM24	activation	chr1	56410981	56415504	RREB1	chr1	56411817	56411836
TRIM24	activation	chr1	56410981	56415504	RREB1	chr1	56411828	56411847
TRIM24	activation	chr1	56410981	56415504	RREB1	chr1	56411833	56411852
TRIM24	activation	chr1	56410981	56415504	KLF5	chr1	56411951	56411960
TRIM24	activation	chr1	56410981	56415504	TBX3	chr1	56411963	56411972
TRIM24	activation	chr1	56410981	56415504	SNAI1	chr1	56411965	56411974
TRIM24	activation	chr1	56410981	56415504	ELF1	chr1	56412044	56412057
TRIM24	activation	chr1	56410981	56415504	ETV4	chr1	56412046	56412055
TRIM24	activation	chr1	56410981	56415504	ETV5	chr1	56412046	56412056
TRIM24	activation	chr1	56410981	56415504	KLF5	chr1	56412059	56412068
TRIM24	activation	chr1	56410981	56415504	ETV4	chr1	56412491	56412500
TRIM24	activation	chr1	56410981	56415504	GRHL1	chr1	56412626	56412637
TRIM24	activation	chr1	56410981	56415504	GRHL2	chr1	56412626	56412637
TRIM24	activation	chr1	56410981	56415504	SNAI1	chr1	56412697	56412706
TRIM24	activation	chr1	56410981	56415504	TCF12	chr1	56412697	56412707
TRIM24	activation	chr1	56410981	56415504	TCF12	chr1	56412803	56412813
TRIM24	activation	chr1	56410981	56415504	TCF12	chr1	56412804	56412814
TRIM24	activation	chr1	56410981	56415504	MYC	chr1	56412812	56412823
TRIM24	activation	chr1	56410981	56415504	TCF12	chr1	56412812	56412822
TRIM24	activation	chr1	56410981	56415504	SNAI1	chr1	56412813	56412822
TRIM24	activation	chr1	56410981	56415504	TCF12	chr1	56412813	56412823
TRIM24	activation	chr1	56410981	56415504	SIX3	chr1	56412845	56412861
TRIM24	activation	chr1	56410981	56415504	TBX3	chr1	56412870	56412879
TRIM24	activation	chr1	56410981	56415504	ZIC2	chr1	56413225	56413238
TRIM24	activation	chr1	56410981	56415504	TCF12	chr1	56413249	56413259
TRIM24	activation	chr1	56410981	56415504	TCF12	chr1	56413268	56413278
TRIM24	activation	chr1	56410981	56415504	ZIC2	chr1	56413287	56413300
TRIM24	activation	chr1	56410981	56415504	GRHL2	chr1	56413290	56413301
TRIM24	activation	chr1	56410981	56415504	BACH1	chr1	56413377	56413389
TRIM24	activation	chr1	56410981	56415504	TCF12	chr1	56413493	56413503
TRIM24	activation	chr1	56410981	56415504	MYC	chr1	56413506	56413517
TRIM24	activation	chr1	56410981	56415504	MYCN	chr1	56413506	56413517
TRIM24	activation	chr1	56410981	56415504	BHLHE40	chr1	56413507	56413516
TRIM24	activation	chr1	56410981	56415504	HIF1A	chr1	56413508	56413517
TRIM24	activation	chr1	56410981	56415504	ELF1	chr1	56413527	56413540
TRIM24	activation	chr1	56410981	56415504	ELF1	chr1	56413550	56413563
TRIM24	activation	chr1	56410981	56415504	ETV4	chr1	56413552	56413561
TRIM24	activation	chr1	56410981	56415504	ESRRG	chr1	56413616	56413625
TRIM24	activation	chr1	56410981	56415504	ESRRG	chr1	56413665	56413674
TRIM24	activation	chr1	56410981	56415504	HIF1A	chr1	56413690	56413699
TRIM24	activation	chr1	56410981	56415504	HIC2	chr1	56413694	56413702
TRIM24	activation	chr1	56410981	56415504	ZIC2	chr1	56413695	56413708
TRIM24	activation	chr1	56410981	56415504	ZIC2	chr1	56413980	56413993
TRIM24	activation	chr1	56410981	56415504	OTX2	chr1	56414023	56414034
TRIM24	activation	chr1	56410981	56415504	PITX2	chr1	56414025	56414032
TRIM24	activation	chr1	56410981	56415504	OTX2	chr1	56414037	56414048
TRIM24	activation	chr1	56410981	56415504	TCF12	chr1	56414117	56414127
TRIM24	activation	chr1	56410981	56415504	TCF12	chr1	56414118	56414128
TRIM24	activation	chr1	56410981	56415504	KLF5	chr1	56414192	56414201
TRIM24	activation	chr1	56410981	56415504	KLF5	chr1	56414335	56414344
TRIM24	activation	chr1	56410981	56415504	DLX5	chr1	56414386	56414393
TRIM24	activation	chr1	56410981	56415504	MSX1	chr1	56414386	56414393
TRIM24	activation	chr1	56410981	56415504	KLF6	chr1	56414748	56414758
TRIM24	activation	chr1	56410981	56415504	ESRRG	chr1	56415076	56415085
TRIM24	activation	chr1	56410981	56415504	TFAP2A	chr1	56415190	56415202
TRIM24	activation	chr1	56410981	56415504	ZIC2	chr1	56415243	56415256
TRIM24	activation	chr1	56410981	56415504	TCF12	chr1	56415251	56415261
TRIM24	activation	chr1	56418634	56420518	ETV4	chr1	56418684	56418693
TRIM24	activation	chr1	56418634	56420518	KLF6	chr1	56418783	56418793
TRIM24	activation	chr1	56418634	56420518	HES1	chr1	56418784	56418793
TRIM24	activation	chr1	56418634	56420518	HEY1	chr1	56418784	56418793
TRIM24	activation	chr1	56418634	56420518	ETV4	chr1	56418862	56418871
TRIM24	activation	chr1	56418634	56420518	KLF5	chr1	56418912	56418921
TRIM24	activation	chr1	56418634	56420518	ETV4	chr1	56419133	56419142
TRIM24	activation	chr1	56418634	56420518	ESRRG	chr1	56419186	56419195
TRIM24	activation	chr1	56418634	56420518	MAFA	chr1	56419230	56419244
TRIM24	activation	chr1	56418634	56420518	ELF1	chr1	56419262	56419275
TRIM24	activation	chr1	56418634	56420518	ETV4	chr1	56419264	56419273
TRIM24	activation	chr1	56418634	56420518	ELF1	chr1	56419284	56419297
TRIM24	activation	chr1	56418634	56420518	ETV5	chr1	56419286	56419296
TRIM24	activation	chr1	56418634	56420518	SALL1	chr1	56419309	56419316
TRIM24	activation	chr1	56418634	56420518	SOX13	chr1	56419355	56419365
TRIM24	activation	chr1	56418634	56420518	ELF1	chr1	56419788	56419801
TRIM24	activation	chr1	56418634	56420518	SOX3	chr1	56419916	56419925
TRIM24	activation	chr1	56418634	56420518	SOX4	chr1	56419946	56419955
TRIM24	activation	chr1	56418634	56420518	ZIC2	chr1	56420005	56420018
TRIM24	activation	chr1	56418634	56420518	KLF5	chr1	56420031	56420040
TRIM24	activation	chr1	56418634	56420518	NFKB2	chr1	56420209	56420221
TRIM24	activation	chr1	56418634	56420518	ESRRG	chr1	56420376	56420385
TRIM24	activation	chr1	56418634	56420518	ESRRG	chr1	56420456	56420465
TRIM24	activation	chr1	56420828	56422284	GRHL2	chr1	56420943	56420954
TRIM24	activation	chr1	56420828	56422284	GATA2	chr1	56421070	56421080
TRIM24	activation	chr1	56420828	56422284	TCF12	chr1	56421253	56421263
TRIM24	activation	chr1	56420828	56422284	MSX1	chr1	56421290	56421297
TRIM24	activation	chr1	56420828	56422284	MEIS2	chr1	56421327	56421334
TRIM24	activation	chr1	56420828	56422284	ZIC2	chr1	56421353	56421366
TRIM24	activation	chr1	56420828	56422284	TCF12	chr1	56421393	56421403
TRIM24	activation	chr1	56420828	56422284	MEIS2	chr1	56421403	56421410
TRIM24	activation	chr1	56420828	56422284	ZIC2	chr1	56421563	56421576
TRIM24	activation	chr1	56420828	56422284	ZIC2	chr1	56421647	56421660
TRIM24	activation	chr1	56420828	56422284	RREB1	chr1	56421650	56421669
TRIM24	activation	chr1	56420828	56422284	EOMES	chr1	56421716	56421728
TRIM24	activation	chr1	56420828	56422284	MEIS2	chr1	56421719	56421733
TRIM24	activation	chr1	56420828	56422284	GRHL2	chr1	56422195	56422206
TRIM24	activation	chr1	56429729	56430843	TFAP2A	chr1	56429897	56429910
TRIM24	activation	chr1	56429729	56430843	TFAP2A	chr1	56429897	56429909
TRIM24	activation	chr1	56429729	56430843	TFAP2A	chr1	56429898	56429911
TRIM24	activation	chr1	56429729	56430843	TFAP2A	chr1	56429898	56429909
TRIM24	activation	chr1	56429729	56430843	HESX1	chr1	56429938	56429947
TRIM24	activation	chr1	56429729	56430843	LHX5	chr1	56429939	56429946
TRIM24	activation	chr1	56429729	56430843	SOX3	chr1	56429992	56430001
TRIM24	activation	chr1	56429729	56430843	ETV4	chr1	56430262	56430271
TRIM24	activation	chr1	56429729	56430843	EOMES	chr1	56430487	56430499
TRIM24	activation	chr1	56429729	56430843	TBX3	chr1	56430490	56430499
TRIM24	activation	chr1	56429729	56430843	MGA	chr1	56430491	56430498
TRIM24	activation	chr1	56429729	56430843	GRHL2	chr1	56430809	56430820
TRIM24	activation	chr1	56488346	56492881	GATA2	chr1	56488394	56488404
TRIM24	activation	chr1	56488346	56492881	LMX1B	chr1	56488452	56488462
TRIM24	activation	chr1	56488346	56492881	LHX5	chr1	56488455	56488462
TRIM24	activation	chr1	56488346	56492881	LMX1B	chr1	56488455	56488465
TRIM24	activation	chr1	56488346	56492881	FOXA2	chr1	56488598	56488608
TRIM24	activation	chr1	56488346	56492881	BACH1	chr1	56488770	56488782
TRIM24	activation	chr1	56488346	56492881	RREB1	chr1	56488823	56488842
TRIM24	activation	chr1	56488346	56492881	SOX3	chr1	56488998	56489007
TRIM24	activation	chr1	56488346	56492881	SOX4	chr1	56488999	56489008
TRIM24	activation	chr1	56488346	56492881	SOX3	chr1	56489015	56489024
TRIM24	activation	chr1	56488346	56492881	SOX4	chr1	56489016	56489025
TRIM24	activation	chr1	56488346	56492881	GRHL2	chr1	56489035	56489046
TRIM24	activation	chr1	56488346	56492881	KLF5	chr1	56489048	56489057
TRIM24	activation	chr1	56488346	56492881	TCF12	chr1	56489059	56489069
TRIM24	activation	chr1	56488346	56492881	TCF12	chr1	56489060	56489070
TRIM24	activation	chr1	56488346	56492881	RREB1	chr1	56489092	56489111
TRIM24	activation	chr1	56488346	56492881	TFAP2A	chr1	56489103	56489114
TRIM24	activation	chr1	56488346	56492881	HIC2	chr1	56489652	56489660
TRIM24	activation	chr1	56488346	56492881	EOMES	chr1	56489865	56489877
TRIM24	activation	chr1	56488346	56492881	KLF6	chr1	56489970	56489980
TRIM24	activation	chr1	56488346	56492881	ZIC2	chr1	56490187	56490200
TRIM24	activation	chr1	56488346	56492881	SOX4	chr1	56490249	56490258
TRIM24	activation	chr1	56488346	56492881	MYC	chr1	56490319	56490330
TRIM24	activation	chr1	56488346	56492881	BHLHE40	chr1	56490320	56490329
TRIM24	activation	chr1	56488346	56492881	HES1	chr1	56490320	56490329
TRIM24	activation	chr1	56488346	56492881	HEY1	chr1	56490320	56490329
TRIM24	activation	chr1	56488346	56492881	FOXA2	chr1	56490341	56490351
TRIM24	activation	chr1	56488346	56492881	TCF7L1	chr1	56490422	56490433
TRIM24	activation	chr1	56488346	56492881	CDX2	chr1	56490479	56490490
TRIM24	activation	chr1	56488346	56492881	CDX2	chr1	56490514	56490525
TRIM24	activation	chr1	56488346	56492881	TCF12	chr1	56490563	56490573
TRIM24	activation	chr1	56488346	56492881	SOX3	chr1	56490723	56490732
TRIM24	activation	chr1	56488346	56492881	SOX4	chr1	56490724	56490733
TRIM24	activation	chr1	56488346	56492881	GRHL2	chr1	56490826	56490837
TRIM24	activation	chr1	56488346	56492881	NANOG	chr1	56491028	56491038
TRIM24	activation	chr1	56488346	56492881	SOX13	chr1	56491028	56491038
TRIM24	activation	chr1	56488346	56492881	SOX2	chr1	56491028	56491038
TRIM24	activation	chr1	56488346	56492881	SOX4	chr1	56491045	56491054
TRIM24	activation	chr1	56488346	56492881	SOX3	chr1	56491046	56491055
TRIM24	activation	chr1	56488346	56492881	ESRRG	chr1	56491184	56491193
TRIM24	activation	chr1	56488346	56492881	ZIC2	chr1	56491237	56491250
TRIM24	activation	chr1	56488346	56492881	SIX3	chr1	56491425	56491441
TRIM24	activation	chr1	56488346	56492881	MAFA	chr1	56491450	56491464
TRIM24	activation	chr1	56488346	56492881	BACH1	chr1	56491452	56491464
TRIM24	activation	chr1	56488346	56492881	KLF6	chr1	56491545	56491555
TRIM24	activation	chr1	56488346	56492881	TFAP2A	chr1	56491568	56491581
TRIM24	activation	chr1	56488346	56492881	GATA2	chr1	56491615	56491625
TRIM24	activation	chr1	56488346	56492881	ELF1	chr1	56491639	56491652
TRIM24	activation	chr1	56488346	56492881	ETS2	chr1	56491640	56491649
TRIM24	activation	chr1	56488346	56492881	OTX2	chr1	56491667	56491678
TRIM24	activation	chr1	56488346	56492881	PITX2	chr1	56491669	56491676
TRIM24	activation	chr1	56488346	56492881	CDX2	chr1	56491706	56491717
TRIM24	activation	chr1	56488346	56492881	NANOG	chr1	56491728	56491738
TRIM24	activation	chr1	56488346	56492881	SOX13	chr1	56491728	56491738
TRIM24	activation	chr1	56488346	56492881	SOX2	chr1	56491728	56491738
TRIM24	activation	chr1	56488346	56492881	SOX4	chr1	56491729	56491738
TRIM24	activation	chr1	56488346	56492881	SOX3	chr1	56491730	56491739
TRIM24	activation	chr1	56488346	56492881	OTX2	chr1	56491847	56491858
TRIM24	activation	chr1	56488346	56492881	PITX2	chr1	56491849	56491856
TRIM24	activation	chr1	56488346	56492881	MAFA	chr1	56491994	56492008
TRIM24	activation	chr1	56488346	56492881	TFAP2A	chr1	56492130	56492141
TRIM24	activation	chr1	56488346	56492881	TCF12	chr1	56492157	56492167
TRIM24	activation	chr1	56488346	56492881	SNAI1	chr1	56492158	56492167
TRIM24	activation	chr1	56488346	56492881	TCF12	chr1	56492158	56492168
TRIM24	activation	chr1	56488346	56492881	SP4	chr1	56492262	56492278
TRIM24	activation	chr1	56488346	56492881	KLF6	chr1	56492264	56492274
TRIM24	activation	chr1	56488346	56492881	KLF5	chr1	56492265	56492274
TRIM24	activation	chr1	56488346	56492881	KLF5	chr1	56492271	56492280
TRIM24	activation	chr1	56488346	56492881	KLF6	chr1	56492293	56492303
TRIM24	activation	chr1	56488346	56492881	KLF5	chr1	56492294	56492303
TRIM24	activation	chr1	56488346	56492881	KLF6	chr1	56492316	56492326
TRIM24	activation	chr1	56488346	56492881	KLF5	chr1	56492380	56492389
TRIM24	activation	chr1	56488346	56492881	ZIC3	chr1	56492428	56492442
TRIM24	activation	chr1	56488346	56492881	TFAP2A	chr1	56492431	56492442
TRIM24	activation	chr1	56488346	56492881	GRHL2	chr1	56492554	56492565
TRIM24	activation	chr1	56488346	56492881	ZIC3	chr1	56492574	56492588
TRIM24	activation	chr1	56488346	56492881	TFAP2A	chr1	56492596	56492608
TRIM24	activation	chr1	56488346	56492881	HIC2	chr1	56492655	56492663
TRIM24	activation	chr1	56488346	56492881	TFAP2A	chr1	56492667	56492678
TRIM24	activation	chr1	56488346	56492881	TFAP2A	chr1	56492668	56492679
TRIM24	activation	chr1	56488346	56492881	NANOG	chr1	56492723	56492733
TRIM24	activation	chr1	56488346	56492881	SOX13	chr1	56492723	56492733
TRIM24	activation	chr1	56488346	56492881	SOX2	chr1	56492723	56492733
TRIM24	activation	chr1	56488346	56492881	SOX4	chr1	56492724	56492733
TRIM24	activation	chr1	56488346	56492881	SOX3	chr1	56492725	56492734
TRIM24	activation	chr1	56488346	56492881	KLF5	chr1	56492760	56492769
TRIM24	activation	chr1	56488346	56492881	HES1	chr1	56492824	56492833
TRIM24	activation	chr1	56493090	56493580	SP4	chr1	56493106	56493122
TRIM24	activation	chr1	56493090	56493580	KLF5	chr1	56493109	56493118
TRIM24	activation	chr1	56493090	56493580	TFAP2A	chr1	56493114	56493126
TRIM24	activation	chr1	56493090	56493580	TCF12	chr1	56493206	56493216
TRIM24	activation	chr1	56493090	56493580	MYC	chr1	56493213	56493224
TRIM24	activation	chr1	56493090	56493580	MYCN	chr1	56493213	56493224
TRIM24	activation	chr1	56493090	56493580	HES1	chr1	56493214	56493223
TRIM24	activation	chr1	56493090	56493580	HEY1	chr1	56493214	56493223
TRIM24	activation	chr1	56493090	56493580	TCF12	chr1	56493214	56493224
TRIM24	activation	chr1	56493090	56493580	HIF1A	chr1	56493215	56493224
TRIM24	activation	chr1	56493090	56493580	TCF12	chr1	56493295	56493305
TRIM24	activation	chr1	56493090	56493580	SNAI1	chr1	56493296	56493305
TRIM24	activation	chr1	56493090	56493580	TCF12	chr1	56493296	56493306
TRIM24	activation	chr1	56493090	56493580	MEIS2	chr1	56493549	56493563
TRIM24	activation	chr1	56493090	56493580	SALL1	chr1	56493551	56493561
TRIM24	activation	chr1	56537668	56537943	CDX2	chr1	56537691	56537702
TRIM24	activation	chr1	56537668	56537943	MEIS2	chr1	56537692	56537706
TRIM24	activation	chr1	56537668	56537943	MGA	chr1	56537773	56537780
TRIM24	activation	chr1	56537668	56537943	TCF12	chr1	56537835	56537845
TRIM24	activation	chr1	56537668	56537943	HIF1A	chr1	56537858	56537867
TRIM24	activation	chr1	56537668	56537943	MYC	chr1	56537858	56537869
TRIM24	activation	chr1	56537668	56537943	BHLHE40	chr1	56537859	56537868
TRIM24	activation	chr1	56537668	56537943	HEY1	chr1	56537859	56537868
TRIM24	activation	chr1	56537668	56537943	EOMES	chr1	56537871	56537883
TRIM24	activation	chr1	56537668	56537943	TBX3	chr1	56537871	56537880
TRIM24	activation	chr1	56537668	56537943	MGA	chr1	56537872	56537879
TRIM24	activation	chr1	56537668	56537943	ELF1	chr1	56537876	56537889
TRIM24	repression_index_4	chr1	56589923	56590432	KLF5	chr1	56589998	56590007
TRIM24	repression_index_4	chr1	56589923	56590432	TCF7L1	chr1	56590071	56590082
TRIM24	repression_index_4	chr1	56589923	56590432	EOMES	chr1	56590148	56590160
TRIM24	repression_index_4	chr1	56589923	56590432	SOX2	chr1	56590181	56590191
TRIM24	repression_index_4	chr1	56589923	56590432	NANOG	chr1	56590181	56590191
TRIM24	repression_index_4	chr1	56589923	56590432	TCF12	chr1	56590281	56590291
TRIM24	repression_index_4	chr1	56589923	56590432	SNAI1	chr1	56590282	56590291
TRIM24	repression_index_4	chr1	56589923	56590432	TFAP2A	chr1	56590344	56590357
TRIM24	repression_index_4	chr1	56589923	56590432	TFAP2A	chr1	56590345	56590358
TRIM24	repression_index_4	chr1	56589923	56590432	TFAP2A	chr1	56590345	56590356
TRIM24	repression_index_4	chr1	56589923	56590432	SNAI1	chr1	56590353	56590362
TRIM24	repression_index_4	chr1	56589923	56590432	TCF12	chr1	56590353	56590363
NANOG	activation	chr1	75885893	75886696	MEIS2	chr1	75885965	75885972
NANOG	activation	chr1	75885893	75886696	OTX2	chr1	75886041	75886052
NANOG	activation	chr1	75885893	75886696	ZNF821	chr1	75886073	75886087
NANOG	activation	chr1	75885893	75886696	SOX3	chr1	75886101	75886110
NANOG	activation	chr1	75885893	75886696	GRHL2	chr1	75886183	75886194
NANOG	activation	chr1	75885893	75886696	NANOG	chr1	75886282	75886292
NANOG	activation	chr1	75885893	75886696	SOX13	chr1	75886282	75886292
NANOG	activation	chr1	75885893	75886696	SOX2	chr1	75886282	75886292
NANOG	activation	chr1	75885893	75886696	TFAP2A	chr1	75886305	75886318
NANOG	activation	chr1	75885893	75886696	ZIC2	chr1	75886324	75886337
NANOG	activation	chr1	75885893	75886696	SOX4	chr1	75886405	75886414
NANOG	activation	chr1	75885893	75886696	SOX3	chr1	75886406	75886415
NANOG	activation	chr1	75885893	75886696	SOX4	chr1	75886413	75886422
NANOG	activation	chr1	75885893	75886696	KLF5	chr1	75886427	75886436
NANOG	activation	chr1	75885893	75886696	SALL1	chr1	75886504	75886511
NANOG	repression_index_4	chr1	75895895	75896739	IRF7	chr1	75896035	75896048
NANOG	repression_index_4	chr1	75895895	75896739	SALL1	chr1	75896142	75896152
NANOG	repression_index_4	chr1	75895895	75896739	ELF1	chr1	75896200	75896213
NANOG	repression_index_4	chr1	75895895	75896739	ETV4	chr1	75896202	75896211
NANOG	repression_index_4	chr1	75895895	75896739	ELF1	chr1	75896204	75896217
NANOG	repression_index_4	chr1	75895895	75896739	ETV4	chr1	75896206	75896215
NANOG	repression_index_4	chr1	75895895	75896739	TCF12	chr1	75896318	75896328
NANOG	repression_index_4	chr1	75895895	75896739	TCF12	chr1	75896319	75896329
NANOG	repression_index_4	chr1	75895895	75896739	TCF7L2	chr1	75896365	75896378
NANOG	repression_index_4	chr1	75895895	75896739	TFAP2A	chr1	75896377	75896389
NANOG	repression_index_4	chr1	75895895	75896739	SIX3	chr1	75896400	75896416
NANOG	repression_index_4	chr1	75895895	75896739	TCF12	chr1	75896549	75896559
NANOG	repression_index_4	chr1	75895895	75896739	SNAI1	chr1	75896550	75896559
NANOG	repression_index_4	chr1	75895895	75896739	ZIC2	chr1	75896566	75896579
NANOG	repression_index_4	chr1	75895895	75896739	TFAP2A	chr1	75896604	75896617
NANOG	repression_index_4	chr1	75895895	75896739	ZIC2	chr1	75896615	75896628
NANOG	repression_index_4	chr1	75895895	75896739	TBX3	chr1	75896670	75896679
NANOG	repression_index_4	chr1	75921182	75922451	BACH1	chr1	75921182	75921194
NANOG	repression_index_4	chr1	75921182	75922451	KLF5	chr1	75921212	75921221
NANOG	repression_index_4	chr1	75921182	75922451	ELF1	chr1	75921212	75921225
NANOG	repression_index_4	chr1	75921182	75922451	BACH1	chr1	75921286	75921298
NANOG	repression_index_4	chr1	75921182	75922451	ZNF821	chr1	75921535	75921549
NANOG	repression_index_4	chr1	75921182	75922451	TCF12	chr1	75921571	75921581
NANOG	repression_index_4	chr1	75921182	75922451	SALL1	chr1	75921698	75921708
NANOG	repression_index_4	chr1	75921182	75922451	BACH1	chr1	75921740	75921752
NANOG	repression_index_4	chr1	75921182	75922451	ETV4	chr1	75921923	75921932
NANOG	repression_index_4	chr1	75921182	75922451	SOX2	chr1	75921937	75921947
NANOG	repression_index_4	chr1	75921182	75922451	ESRRG	chr1	75922018	75922027
NANOG	repression_index_4	chr1	75921182	75922451	SOX4	chr1	75922135	75922144
NANOG	repression_index_4	chr1	75921182	75922451	SALL1	chr1	75922145	75922155
NANOG	repression_index_4	chr1	75921182	75922451	SOX3	chr1	75922223	75922232
NANOG	repression_index_4	chr1	75921182	75922451	SOX2	chr1	75922293	75922303
NANOG	repression_index_4	chr1	75921182	75922451	NANOG	chr1	75922293	75922303
NANOG	activation	chr1	75933948	75934641	RREB1	chr1	75933979	75933998
NANOG	activation	chr1	75933948	75934641	NANOG	chr1	75933988	75933998
NANOG	activation	chr1	75933948	75934641	SOX13	chr1	75933988	75933998
NANOG	activation	chr1	75933948	75934641	SOX2	chr1	75933988	75933998
NANOG	activation	chr1	75933948	75934641	ETV4	chr1	75934176	75934185
NANOG	activation	chr1	75933948	75934641	KLF5	chr1	75934216	75934225
NANOG	activation	chr1	75933948	75934641	TCF7L2	chr1	75934383	75934396
NANOG	activation	chr1	75933948	75934641	ZIC3	chr1	75934511	75934525
NANOG	activation	chr1	75933948	75934641	GRHL1	chr1	75934533	75934544
NANOG	activation	chr1	75933948	75934641	GRHL2	chr1	75934533	75934544
NANOG	activation	chr1	75933948	75934641	GRHL3	chr1	75934533	75934544
BACH1	activation	chr1	104080620	104081043	RREB1	chr1	104080733	104080752
BACH1	activation	chr1	104080620	104081043	HIF1A	chr1	104080796	104080805
BACH1	activation	chr1	104080620	104081043	BACH1	chr1	104080904	104080916
BACH1	activation	chr1	104080620	104081043	KLF6	chr1	104080924	104080934
BACH1	activation	chr1	104080620	104081043	KLF5	chr1	104080925	104080934
BACH1	activation	chr1	104080620	104081043	TBX3	chr1	104080925	104080934
BACH1	activation	chr1	104080620	104081043	MGA	chr1	104080926	104080933
BACH1	activation	chr1	104080620	104081043	ZIC2	chr1	104080967	104080980
BACH1	activation	chr1	104088902	104090645	TCF12	chr1	104089190	104089200
BACH1	activation	chr1	104088902	104090645	TCF12	chr1	104089191	104089201
BACH1	activation	chr1	104088902	104090645	TFAP2A	chr1	104089222	104089233
BACH1	activation	chr1	104088902	104090645	ZIC2	chr1	104089291	104089304
BACH1	activation	chr1	104088902	104090645	ZIC3	chr1	104089292	104089306
BACH1	activation	chr1	104088902	104090645	SOX3	chr1	104089439	104089448
BACH1	activation	chr1	104088902	104090645	TFAP2A	chr1	104089526	104089538
BACH1	activation	chr1	104088902	104090645	TFAP2A	chr1	104089571	104089582
BACH1	activation	chr1	104088902	104090645	BHLHE40	chr1	104089670	104089679
BACH1	activation	chr1	104088902	104090645	HES1	chr1	104089670	104089679
BACH1	activation	chr1	104088902	104090645	HEY1	chr1	104089670	104089679
BACH1	activation	chr1	104088902	104090645	KLF6	chr1	104089739	104089749
BACH1	activation	chr1	104088902	104090645	ZIC3	chr1	104089752	104089766
BACH1	activation	chr1	104088902	104090645	SOX3	chr1	104089844	104089853
BACH1	activation	chr1	104088902	104090645	TCF12	chr1	104089894	104089904
BACH1	activation	chr1	104088902	104090645	TFAP2A	chr1	104089903	104089915
BACH1	activation	chr1	104088902	104090645	ZIC3	chr1	104089989	104090003
BACH1	activation	chr1	104088902	104090645	KLF5	chr1	104090003	104090012
BACH1	activation	chr1	104088902	104090645	TFAP2A	chr1	104090008	104090020
BACH1	activation	chr1	104088902	104090645	TFAP2A	chr1	104090009	104090021
BACH1	activation	chr1	104088902	104090645	TFAP2A	chr1	104090028	104090040
BACH1	activation	chr1	104088902	104090645	HES1	chr1	104090062	104090071
BACH1	activation	chr1	104088902	104090645	GBX2	chr1	104090227	104090236
BACH1	activation	chr1	104088902	104090645	DLX5	chr1	104090228	104090235
BACH1	activation	chr1	104088902	104090645	MSX1	chr1	104090228	104090235
BACH1	activation	chr1	104111379	104111764	BACH1	chr1	104111440	104111452
BACH1	activation	chr1	104111379	104111764	TCF12	chr1	104111448	104111458
BACH1	activation	chr1	104111379	104111764	BACH1	chr1	104111458	104111470
BACH1	activation	chr1	104111379	104111764	MEIS2	chr1	104111491	104111498
BACH1	activation	chr1	104111379	104111764	GRHL2	chr1	104111524	104111535
BACH1	activation	chr1	104111379	104111764	MGA	chr1	104111646	104111653
BACH1	activation	chr1	104111379	104111764	TFAP2A	chr1	104111742	104111753
BACH1	activation	chr1	104154631	104155413	GRHL2	chr1	104154792	104154803
BACH1	activation	chr1	104154631	104155413	KLF5	chr1	104154924	104154933
BACH1	activation	chr1	104154631	104155413	TCF12	chr1	104155069	104155079
BACH1	activation	chr1	104154631	104155413	MEIS2	chr1	104155189	104155196
BACH1	activation	chr1	104154631	104155413	TFAP2A	chr1	104155195	104155208
BACH1	activation	chr1	104154631	104155413	BACH1	chr1	104155215	104155227
BACH1	activation	chr1	104154631	104155413	KLF5	chr1	104155226	104155235
BACH1	activation	chr1	104154631	104155413	TCF12	chr1	104155232	104155242
BACH1	activation	chr1	104154631	104155413	TCF12	chr1	104155233	104155243
BACH1	activation	chr1	104154631	104155413	HIC2	chr1	104155272	104155280
BACH1	activation	chr1	104154631	104155413	HIC2	chr1	104155300	104155308
BACH1	activation	chr1	104154631	104155413	TFAP2A	chr1	104155309	104155321
BACH1	activation	chr1	104154631	104155413	TFAP2A	chr1	104155309	104155322
BACH1	activation	chr1	104154631	104155413	RREB1	chr1	104155368	104155387
BACH1	activation	chr1	104154631	104155413	TCF7L2	chr1	104155393	104155406
BACH1	activation	chr1	104456390	104456660	ZNF423	chr1	104456469	104456483
BACH1	activation	chr1	104456390	104456660	TFAP2A	chr1	104456518	104456530
BACH1	activation	chr1	104456390	104456660	TCF12	chr1	104456530	104456540
BACH1	activation	chr1	104456390	104456660	HIC2	chr1	104456543	104456551
BACH1	activation	chr1	104456390	104456660	KLF5	chr1	104456586	104456595
BACH1	activation	chr1	104456390	104456660	SOX3	chr1	104456639	104456648
BACH1	activation	chr1	104456390	104456660	NANOG	chr1	104456640	104456650
BACH1	activation	chr1	104456390	104456660	SOX13	chr1	104456640	104456650
BACH1	activation	chr1	104456390	104456660	SOX2	chr1	104456640	104456650
BACH1	activation	chr1	104456390	104456660	SOX4	chr1	104456640	104456649
ETS2	repression_index_4	chr1	107790960	107792275	MYC	chr1	107791087	107791098
ETS2	repression_index_4	chr1	107790960	107792275	BHLHE40	chr1	107791088	107791097
ETS2	repression_index_4	chr1	107790960	107792275	HES1	chr1	107791088	107791097
ETS2	repression_index_4	chr1	107790960	107792275	HEY1	chr1	107791088	107791097
ETS2	repression_index_4	chr1	107790960	107792275	ZIC2	chr1	107791104	107791117
ETS2	repression_index_4	chr1	107790960	107792275	TCF12	chr1	107791105	107791115
ETS2	repression_index_4	chr1	107790960	107792275	TBX3	chr1	107791173	107791182
ETS2	repression_index_4	chr1	107790960	107792275	MGA	chr1	107791174	107791181
ETS2	repression_index_4	chr1	107790960	107792275	ZIC2	chr1	107791242	107791255
ETS2	repression_index_4	chr1	107790960	107792275	BACH1	chr1	107791246	107791258
ETS2	repression_index_4	chr1	107790960	107792275	MAFA	chr1	107791246	107791260
ETS2	repression_index_4	chr1	107790960	107792275	MEIS2	chr1	107791337	107791351
ETS2	repression_index_4	chr1	107790960	107792275	OTX2	chr1	107791419	107791430
ETS2	repression_index_4	chr1	107790960	107792275	FOXA2	chr1	107791503	107791513
ETS2	repression_index_4	chr1	107790960	107792275	DLX5	chr1	107791561	107791568
ETS2	repression_index_4	chr1	107790960	107792275	GBX2	chr1	107791610	107791619
ETS2	repression_index_4	chr1	107790960	107792275	DLX5	chr1	107791611	107791618
ETS2	repression_index_4	chr1	107790960	107792275	MSX1	chr1	107791611	107791618
ETS2	repression_index_4	chr1	107790960	107792275	LMX1B	chr1	107791617	107791627
ETS2	repression_index_4	chr1	107790960	107792275	LMX1B	chr1	107791672	107791682
ETS2	repression_index_4	chr1	107790960	107792275	HESX1	chr1	107791674	107791683
ETS2	repression_index_4	chr1	107790960	107792275	LMX1B	chr1	107791675	107791685
ETS2	repression_index_4	chr1	107790960	107792275	MSX1	chr1	107791784	107791791
ETS2	repression_index_4	chr1	107790960	107792275	MEF2D	chr1	107791836	107791847
ETS2	repression_index_4	chr1	107790960	107792275	SALL1	chr1	107791837	107791847
[truncated: 47,938 more rows]

## Sheet: 12h
Supplementary Table. NI transcription factor binding sites within regulatory sites 12h after node graft
target gene	chromatin response	chr_galGal5	regulatory_region_start	regulatory_region_end	TF	TF_binding_chr	TF_binding_site_start	TF_binding_site_end
ZNF277	activation	chr1	26914499	26914698	EOMES	chr1	26914548	26914560
ZNF277	activation	chr1	26914499	26914698	MGA	chr1	26914549	26914556
ZNF277	activation	chr1	26914499	26914698	EOMES	chr1	26914555	26914567
ZNF277	activation	chr1	26914499	26914698	TBX3	chr1	26914558	26914567
ZNF277	activation	chr1	26914499	26914698	MGA	chr1	26914559	26914566
ZNF277	activation	chr1	26914499	26914698	TCF12	chr1	26914581	26914591
ZNF277	activation	chr1	26914499	26914698	TCF12	chr1	26914625	26914635
ZNF277	activation	chr1	26916310	26916744	KLF5	chr1	26916340	26916349
ZNF277	activation	chr1	26916310	26916744	TCF12	chr1	26916379	26916389
ZNF277	activation	chr1	26916310	26916744	MYC	chr1	26916416	26916427
ZNF277	activation	chr1	26916310	26916744	MYCN	chr1	26916416	26916427
ZNF277	activation	chr1	26916310	26916744	BHLHE40	chr1	26916417	26916426
ZNF277	activation	chr1	26916310	26916744	HES1	chr1	26916417	26916426
ZNF277	activation	chr1	26916310	26916744	HEY1	chr1	26916417	26916426
ZNF277	activation	chr1	26916310	26916744	HIF1A	chr1	26916418	26916427
ZNF277	activation	chr1	26916310	26916744	HIC2	chr1	26916422	26916430
ZNF277	activation	chr1	26916310	26916744	ETS2	chr1	26916469	26916478
ZNF277	activation	chr1	26916310	26916744	ETS2	chr1	26916478	26916487
ZNF277	activation	chr1	26916310	26916744	GLI2	chr1	26916529	26916543
ZNF277	activation	chr1	26916310	26916744	ZIC2	chr1	26916546	26916559
ZNF277	activation	chr1	26916310	26916744	TFAP2A	chr1	26916590	26916603
ZNF277	activation	chr1	26916310	26916744	TFAP2C	chr1	26916590	26916603
ZNF277	activation	chr1	26916310	26916744	TFAP2A	chr1	26916591	26916604
ZNF277	activation	chr1	26916310	26916744	TFAP2C	chr1	26916591	26916604
ZNF277	activation	chr1	26916310	26916744	TFAP2C	chr1	26916592	26916603
ZNF277	activation	chr1	26937041	26937838	ZIC2	chr1	26937095	26937108
ZNF277	activation	chr1	26937041	26937838	KLF5	chr1	26937107	26937116
ZNF277	activation	chr1	26937041	26937838	MEIS2	chr1	26937145	26937152
ZNF277	activation	chr1	26937041	26937838	ELF1	chr1	26937181	26937194
ZNF277	activation	chr1	26937041	26937838	HIC2	chr1	26937358	26937366
ZNF277	activation	chr1	26937041	26937838	TCF12	chr1	26937378	26937388
ZNF277	activation	chr1	26937041	26937838	ZIC2	chr1	26937385	26937398
ZNF277	activation	chr1	26937041	26937838	SALL1	chr1	26937397	26937404
ZNF277	activation	chr1	26937041	26937838	NFKB2	chr1	26937398	26937410
ZNF277	activation	chr1	26937041	26937838	MYC	chr1	26937481	26937492
ZNF277	activation	chr1	26937041	26937838	HEY1	chr1	26937482	26937491
ZNF277	activation	chr1	26937041	26937838	TBX3	chr1	26937610	26937619
ZNF277	activation	chr1	26937041	26937838	MEIS2	chr1	26937625	26937632
ZNF277	activation	chr1	26937041	26937838	TFAP2C	chr1	26937711	26937724
ZNF277	activation	chr1	26937041	26937838	HIC2	chr1	26937723	26937731
ZNF277	activation	chr1	26937041	26937838	HIC2	chr1	26937803	26937811
ZNF277	activation	chr1	26938198	26938454	TCF12	chr1	26938282	26938292
ZNF277	activation	chr1	26938198	26938454	ELF1	chr1	26938289	26938302
ZNF277	activation	chr1	26938198	26938454	TFAP2A	chr1	26938314	26938327
ZNF277	activation	chr1	26938198	26938454	TFAP2C	chr1	26938314	26938327
ZNF277	activation	chr1	26938198	26938454	TFAP2A	chr1	26938315	26938328
ZNF277	activation	chr1	26942210	26943330	OTX2	chr1	26942253	26942264
ZNF277	activation	chr1	26942210	26943330	PITX2	chr1	26942255	26942262
ZNF277	activation	chr1	26942210	26943330	KLF6	chr1	26942294	26942304
ZNF277	activation	chr1	26942210	26943330	ZIC2	chr1	26942317	26942330
ZNF277	activation	chr1	26942210	26943330	TCF7L2	chr1	26942326	26942339
ZNF277	activation	chr1	26942210	26943330	SOX3	chr1	26942328	26942337
ZNF277	activation	chr1	26942210	26943330	SOX4	chr1	26942329	26942338
ZNF277	activation	chr1	26942210	26943330	GATA2	chr1	26942423	26942433
ZNF277	activation	chr1	26942210	26943330	ZIC2	chr1	26942579	26942592
ZNF277	activation	chr1	26942210	26943330	BACH1	chr1	26942711	26942723
ZNF277	activation	chr1	26942210	26943330	SP4	chr1	26942712	26942728
ZNF277	activation	chr1	26942210	26943330	KLF5	chr1	26942715	26942724
ZNF277	activation	chr1	26942210	26943330	TCF7L2	chr1	26942770	26942783
ZNF277	activation	chr1	26942210	26943330	ELF1	chr1	26942852	26942865
ZNF277	activation	chr1	26942210	26943330	MYC	chr1	26943068	26943079
ZNF277	activation	chr1	26942210	26943330	HIC2	chr1	26943074	26943082
ZNF277	activation	chr1	26942210	26943330	TFAP2A	chr1	26943156	26943169
ZNF277	activation	chr1	26942210	26943330	TFAP2C	chr1	26943156	26943169
ZNF277	activation	chr1	26942210	26943330	ZNF423	chr1	26943276	26943290
ZNF277	activation	chr1	26943739	26944107	TFAP2A	chr1	26943960	26943972
ZNF277	activation	chr1	26943739	26944107	TFAP2C	chr1	26943960	26943972
ZNF277	activation	chr1	26943739	26944107	DLX5	chr1	26943992	26943999
ZNF277	activation	chr1	26944926	26946836	ZIC2	chr1	26945020	26945033
ZNF277	activation	chr1	26944926	26946836	GRHL2	chr1	26945205	26945216
ZNF277	activation	chr1	26944926	26946836	RREB1	chr1	26945221	26945240
ZNF277	activation	chr1	26944926	26946836	KLF6	chr1	26945232	26945242
ZNF277	activation	chr1	26944926	26946836	SOX4	chr1	26945430	26945439
ZNF277	activation	chr1	26944926	26946836	TFAP2A	chr1	26945730	26945741
ZNF277	activation	chr1	26944926	26946836	TFAP2C	chr1	26945730	26945741
ZNF277	activation	chr1	26944926	26946836	ZIC2	chr1	26945739	26945752
ZNF277	activation	chr1	26944926	26946836	HIC2	chr1	26945808	26945816
ZNF277	activation	chr1	26944926	26946836	SOX3	chr1	26945812	26945821
ZNF277	activation	chr1	26944926	26946836	TBX3	chr1	26945835	26945844
ZNF277	activation	chr1	26944926	26946836	ZIC2	chr1	26945879	26945892
ZNF277	activation	chr1	26944926	26946836	TFAP2A	chr1	26945894	26945907
ZNF277	activation	chr1	26944926	26946836	TFAP2C	chr1	26945894	26945907
ZNF277	activation	chr1	26944926	26946836	TFAP2A	chr1	26945936	26945949
ZNF277	activation	chr1	26944926	26946836	ZIC2	chr1	26946014	26946027
ZNF277	activation	chr1	26944926	26946836	GRHL2	chr1	26946070	26946081
ZNF277	activation	chr1	26944926	26946836	ELF1	chr1	26946101	26946114
ZNF277	activation	chr1	26944926	26946836	TCF12	chr1	26946203	26946213
ZNF277	activation	chr1	26944926	26946836	LHX5	chr1	26946245	26946252
ZNF277	activation	chr1	26944926	26946836	NKX6-2	chr1	26946245	26946252
ZNF277	activation	chr1	26944926	26946836	KLF5	chr1	26946278	26946287
ZNF277	activation	chr1	26944926	26946836	SOX3	chr1	26946329	26946338
ZNF277	activation	chr1	26944926	26946836	MEIS2	chr1	26946352	26946359
ZNF277	activation	chr1	26944926	26946836	TCF12	chr1	26946374	26946384
ZNF277	activation	chr1	26944926	26946836	SALL1	chr1	26946442	26946449
ZNF277	activation	chr1	26944926	26946836	TFAP2A	chr1	26946684	26946697
ZNF277	activation	chr1	26944926	26946836	TFAP2C	chr1	26946684	26946697
ZNF277	activation	chr1	26944926	26946836	TFAP2A	chr1	26946685	26946698
ZNF277	activation	chr1	26944926	26946836	TFAP2A	chr1	26946686	26946697
ZNF277	activation	chr1	26944926	26946836	TFAP2C	chr1	26946686	26946697
ZNF277	activation	chr1	26944926	26946836	NANOG	chr1	26946723	26946733
ZNF277	activation	chr1	26944926	26946836	SOX13	chr1	26946723	26946733
ZNF277	activation	chr1	26944926	26946836	SOX2	chr1	26946723	26946733
ZNF277	activation	chr1	26944926	26946836	LMX1B	chr1	26946755	26946765
ZNF277	activation	chr1	26944926	26946836	HESX1	chr1	26946757	26946766
ZNF277	activation	chr1	26944926	26946836	LHX5	chr1	26946758	26946765
ZNF277	activation	chr1	26944926	26946836	LMX1B	chr1	26946758	26946768
ZNF277	activation	chr1	26944926	26946836	NKX6-2	chr1	26946758	26946765
ZNF277	activation	chr1	26944926	26946836	SOX3	chr1	26946764	26946773
ZNF277	activation	chr1	26944926	26946836	MEIS2	chr1	26946793	26946800
ZNF277	activation	chr1	26958299	26959178	HIF1A	chr1	26958311	26958320
ZNF277	activation	chr1	26958299	26959178	MYC	chr1	26958311	26958322
ZNF277	activation	chr1	26958299	26959178	MYCN	chr1	26958311	26958322
ZNF277	activation	chr1	26958299	26959178	TCF12	chr1	26958311	26958321
ZNF277	activation	chr1	26958299	26959178	BHLHE40	chr1	26958312	26958321
ZNF277	activation	chr1	26958299	26959178	HES1	chr1	26958312	26958321
ZNF277	activation	chr1	26958299	26959178	HEY1	chr1	26958312	26958321
ZNF277	activation	chr1	26958299	26959178	HIF1A	chr1	26958313	26958322
ZNF277	activation	chr1	26958299	26959178	KLF5	chr1	26958405	26958414
ZNF277	activation	chr1	26958299	26959178	MGA	chr1	26958413	26958420
ZNF277	activation	chr1	26958299	26959178	HIC2	chr1	26958429	26958437
ZNF277	activation	chr1	26958299	26959178	ZIC2	chr1	26958433	26958446
ZNF277	activation	chr1	26958299	26959178	ZIC2	chr1	26958568	26958581
ZNF277	activation	chr1	26958299	26959178	TCF7L2	chr1	26958621	26958634
ZNF277	activation	chr1	26958299	26959178	ZIC2	chr1	26958625	26958638
ZNF277	activation	chr1	26958299	26959178	ZIC2	chr1	26958656	26958669
ZNF277	activation	chr1	26958299	26959178	ELF1	chr1	26958674	26958687
ZNF277	activation	chr1	26958299	26959178	KLF5	chr1	26958678	26958687
ZNF277	activation	chr1	26958299	26959178	OTX2	chr1	26958771	26958782
ZNF277	activation	chr1	26958299	26959178	PITX2	chr1	26958773	26958780
ZNF277	activation	chr1	26958299	26959178	KLF5	chr1	26959064	26959073
ZNF277	activation	chr1	26958299	26959178	ELF1	chr1	26959069	26959082
ZNF277	activation	chr1	26958299	26959178	ETV5	chr1	26959071	26959081
ZNF277	activation	chr1	26958299	26959178	SALL1	chr1	26959131	26959141
ZNF277	activation	chr1	26961347	26961583	TCF12	chr1	26961428	26961438
ZNF277	activation	chr1	26961347	26961583	ZIC2	chr1	26961446	26961459
ZNF277	activation	chr1	26961347	26961583	KLF6	chr1	26961464	26961474
ZNF277	activation	chr1	26961347	26961583	ZIC2	chr1	26961477	26961490
ZNF277	activation	chr1	26961347	26961583	MEIS2	chr1	26961501	26961508
ZNF277	activation	chr1	26961347	26961583	TFAP2A	chr1	26961553	26961564
ZNF277	activation	chr1	26961347	26961583	TFAP2C	chr1	26961553	26961564
ZNF277	activation	chr1	27017593	27018302	CDX2	chr1	27017708	27017719
ZNF277	activation	chr1	27017593	27018302	TFAP2A	chr1	27017790	27017803
ZNF277	activation	chr1	27017593	27018302	TFAP2A	chr1	27017791	27017804
ZNF277	activation	chr1	27017593	27018302	TFAP2C	chr1	27017791	27017804
ZNF277	activation	chr1	27017593	27018302	TFAP2A	chr1	27017792	27017803
ZNF277	activation	chr1	27017593	27018302	TFAP2C	chr1	27017792	27017803
ZNF277	activation	chr1	27017593	27018302	TFAP2A	chr1	27017926	27017937
ZNF277	activation	chr1	27017593	27018302	TFAP2C	chr1	27017926	27017937
ZNF277	activation	chr1	27017593	27018302	ELF1	chr1	27017956	27017969
ZNF277	activation	chr1	27017593	27018302	BACH1	chr1	27018000	27018012
ZNF277	activation	chr1	27017593	27018302	HIC2	chr1	27018014	27018022
ZNF277	activation	chr1	27017593	27018302	MYC	chr1	27018016	27018027
ZNF277	activation	chr1	27017593	27018302	MYCN	chr1	27018016	27018027
ZNF277	activation	chr1	27017593	27018302	ZIC2	chr1	27018068	27018081
ZNF277	activation	chr1	27017593	27018302	TBX3	chr1	27018120	27018129
ZNF277	activation	chr1	27017593	27018302	TCF12	chr1	27018245	27018255
ZNF277	activation	chr1	27017593	27018302	TFAP2A	chr1	27018286	27018297
ZNF277	activation	chr1	27048298	27048482	BACH1	chr1	27048335	27048347
ZNF277	activation	chr1	27048298	27048482	TFAP2A	chr1	27048335	27048348
ZNF277	activation	chr1	27048298	27048482	TFAP2C	chr1	27048335	27048348
ZNF277	activation	chr1	27048298	27048482	TFAP2A	chr1	27048402	27048415
ZNF277	activation	chr1	27048298	27048482	TFAP2C	chr1	27048402	27048415
ZNF277	activation	chr1	27050922	27051739	TFAP2A	chr1	27051004	27051017
ZNF277	activation	chr1	27050922	27051739	TFAP2C	chr1	27051004	27051017
ZNF277	activation	chr1	27050922	27051739	SOX3	chr1	27051027	27051036
ZNF277	activation	chr1	27050922	27051739	HIC2	chr1	27051041	27051049
ZNF277	activation	chr1	27050922	27051739	ELF1	chr1	27051052	27051065
ZNF277	activation	chr1	27050922	27051739	SIX3	chr1	27051164	27051180
ZNF277	activation	chr1	27050922	27051739	ZIC2	chr1	27051377	27051390
ZNF277	activation	chr1	27050922	27051739	TCF12	chr1	27051629	27051639
ZNF277	activation	chr1	27050922	27051739	ZIC3	chr1	27051672	27051686
ZNF277	activation	chr1	27050922	27051739	TCF12	chr1	27051673	27051683
ZNF277	activation	chr1	27050922	27051739	ZIC2	chr1	27051674	27051687
ZNF277	activation	chr1	27061684	27061938	ZIC2	chr1	27061712	27061725
ZNF277	activation	chr1	27061684	27061938	ZIC2	chr1	27061756	27061769
ZNF277	activation	chr1	27061684	27061938	KLF5	chr1	27061809	27061818
ZNF277	activation	chr1	27061684	27061938	TFAP2A	chr1	27061815	27061826
ZNF277	activation	chr1	27074761	27075311	TFAP2A	chr1	27074806	27074819
ZNF277	activation	chr1	27074761	27075311	TFAP2A	chr1	27074807	27074820
ZNF277	activation	chr1	27074761	27075311	TFAP2C	chr1	27074807	27074820
ZNF277	activation	chr1	27074761	27075311	BACH1	chr1	27074810	27074822
ZNF277	activation	chr1	27074761	27075311	SIX1	chr1	27075158	27075168
ZNF277	activation	chr1	27074761	27075311	ZNF423	chr1	27075220	27075234
ZNF277	activation	chr1	27074761	27075311	ZIC2	chr1	27075260	27075273
ZNF277	activation	chr1	27074761	27075311	GLI2	chr1	27075296	27075310
ZNF277	activation	chr1	27077093	27077418	BACH1	chr1	27077207	27077219
ZNF277	activation	chr1	27077093	27077418	TBX3	chr1	27077221	27077230
ZNF277	activation	chr1	27077093	27077418	KLF5	chr1	27077235	27077244
ZNF277	activation	chr1	27077093	27077418	MGA	chr1	27077341	27077348
ZNF277	activation	chr1	27083228	27083832	TCF12	chr1	27083284	27083294
ZNF277	activation	chr1	27083228	27083832	ELF1	chr1	27083316	27083329
ZNF277	activation	chr1	27083228	27083832	ETV5	chr1	27083318	27083328
ZNF277	activation	chr1	27083228	27083832	BACH1	chr1	27083338	27083350
ZNF277	activation	chr1	27083228	27083832	HIC2	chr1	27083430	27083438
ZNF277	activation	chr1	27083228	27083832	HIF1A	chr1	27083433	27083442
ZNF277	activation	chr1	27083228	27083832	MYC	chr1	27083433	27083444
ZNF277	activation	chr1	27083228	27083832	BHLHE40	chr1	27083434	27083443
ZNF277	activation	chr1	27083228	27083832	HES1	chr1	27083434	27083443
ZNF277	activation	chr1	27083228	27083832	HEY1	chr1	27083434	27083443
ZNF277	activation	chr1	27083228	27083832	MEF2D	chr1	27083498	27083509
ZNF277	activation	chr1	27083228	27083832	TCF12	chr1	27083507	27083517
ZNF277	activation	chr1	27083228	27083832	ELF1	chr1	27083650	27083663
ZNF277	activation	chr1	27084651	27084811	ZIC2	chr1	27084740	27084753
ZNF277	activation	chr1	27090138	27091344	TCF7L2	chr1	27090498	27090511
ZNF277	activation	chr1	27090138	27091344	GATA2	chr1	27090523	27090533
ZNF277	activation	chr1	27090138	27091344	NANOG	chr1	27090685	27090695
ZNF277	activation	chr1	27090138	27091344	ZIC2	chr1	27090768	27090781
ZNF277	activation	chr1	27090138	27091344	GRHL2	chr1	27090875	27090886
ZNF277	activation	chr1	27090138	27091344	MEIS2	chr1	27091182	27091196
ZNF277	activation	chr1	27090138	27091344	MEIS1	chr1	27091183	27091195
ZNF277	activation	chr1	27090138	27091344	GBX2	chr1	27091197	27091206
ZNF277	activation	chr1	27090138	27091344	HESX1	chr1	27091197	27091206
ZNF277	activation	chr1	27090138	27091344	MSX1	chr1	27091198	27091205
ZNF277	activation	chr1	27091575	27092322	TCF12	chr1	27091585	27091595
ZNF277	activation	chr1	27091575	27092322	MEIS2	chr1	27091621	27091635
ZNF277	activation	chr1	27091575	27092322	TCF12	chr1	27091765	27091775
ZNF277	activation	chr1	27091575	27092322	TCF12	chr1	27091766	27091776
ZNF277	activation	chr1	27091575	27092322	NANOG	chr1	27091847	27091857
ZNF277	activation	chr1	27091575	27092322	SOX13	chr1	27091847	27091857
ZNF277	activation	chr1	27091575	27092322	SOX2	chr1	27091847	27091857
ZNF277	activation	chr1	27091575	27092322	SOX4	chr1	27091847	27091856
ZNF277	activation	chr1	27091575	27092322	ZIC2	chr1	27091910	27091923
ZNF277	activation	chr1	27091575	27092322	MEIS2	chr1	27092219	27092233
ZNF277	activation	chr1	27091575	27092322	MEIS1	chr1	27092220	27092232
ZNF277	activation	chr1	27091575	27092322	TFAP2A	chr1	27092283	27092294
ZNF277	activation	chr1	27091575	27092322	TFAP2C	chr1	27092283	27092294
ZNF277	activation	chr1	27097961	27098482	ZIC2	chr1	27097986	27097999
ZNF277	activation	chr1	27097961	27098482	MEIS2	chr1	27098014	27098021
ZNF277	activation	chr1	27097961	27098482	GRHL2	chr1	27098020	27098031
ZNF277	activation	chr1	27097961	27098482	GRHL3	chr1	27098020	27098031
ZNF277	activation	chr1	27097961	27098482	KLF5	chr1	27098044	27098053
ZNF277	activation	chr1	27097961	27098482	TFAP2A	chr1	27098126	27098137
ZNF277	activation	chr1	27097961	27098482	TCF7L2	chr1	27098247	27098260
ZNF277	activation	chr1	27097961	27098482	HIC2	chr1	27098303	27098311
ZNF277	activation	chr1	27097961	27098482	ZIC3	chr1	27098305	27098319
ZNF277	activation	chr1	27097961	27098482	ZIC2	chr1	27098411	27098424
ZNF277	activation	chr1	27097961	27098482	ZIC2	chr1	27098414	27098427
ZNF277	activation	chr1	27102175	27102387	GBX2	chr1	27102228	27102237
ZNF277	activation	chr1	27102175	27102387	HESX1	chr1	27102228	27102237
ZNF277	activation	chr1	27102175	27102387	DLX5	chr1	27102229	27102236
ZNF277	activation	chr1	27102175	27102387	MSX1	chr1	27102229	27102236
ZNF277	activation	chr1	27102175	27102387	ELF1	chr1	27102298	27102311
ZNF277	activation	chr1	27164073	27164523	MEIS1	chr1	27164110	27164116
ZNF277	activation	chr1	27164073	27164523	MEIS2	chr1	27164110	27164117
ZNF277	activation	chr1	27164073	27164523	TFAP2A	chr1	27164146	27164158
ZNF277	activation	chr1	27164073	27164523	TFAP2C	chr1	27164146	27164158
ZNF277	activation	chr1	27164073	27164523	MEIS2	chr1	27164414	27164421
ZNF277	activation	chr1	27164073	27164523	BACH1	chr1	27164446	27164458
ZNF277	activation	chr1	27164073	27164523	KLF5	chr1	27164457	27164466
ZNF277	activation	chr1	27164073	27164523	TCF12	chr1	27164463	27164473
ZNF277	activation	chr1	27164073	27164523	TCF12	chr1	27164464	27164474
ZNF277	activation	chr1	27265762	27266284	SOX3	chr1	27265824	27265833
ZNF277	activation	chr1	27265762	27266284	KLF5	chr1	27266128	27266137
ZNF277	activation	chr1	27265762	27266284	TCF12	chr1	27266142	27266152
ZNF277	activation	chr1	27265762	27266284	TCF12	chr1	27266164	27266174
ZNF277	activation	chr1	27265762	27266284	TCF12	chr1	27266165	27266175
ZNF277	activation	chr1	27265762	27266284	ZIC2	chr1	27266195	27266208
ZNF277	activation	chr1	27265762	27266284	TFAP2A	chr1	27266217	27266228
ZNF277	activation	chr1	27265762	27266284	TFAP2C	chr1	27266217	27266228
ZNF277	activation	chr1	27271068	27271773	OTX2	chr1	27271075	27271086
ZNF277	activation	chr1	27271068	27271773	PITX2	chr1	27271077	27271084
ZNF277	activation	chr1	27271068	27271773	TCF12	chr1	27271127	27271137
ZNF277	activation	chr1	27271068	27271773	ELF1	chr1	27271175	27271188
ZNF277	activation	chr1	27271068	27271773	ETV5	chr1	27271177	27271187
ZNF277	activation	chr1	27271068	27271773	KLF6	chr1	27271285	27271295
ZNF277	activation	chr1	27271068	27271773	TFAP2A	chr1	27271335	27271348
ZNF277	activation	chr1	27271068	27271773	MEIS2	chr1	27271359	27271366
ZNF277	activation	chr1	27271068	27271773	TCF12	chr1	27271364	27271374
ZNF277	activation	chr1	27271068	27271773	IRF7	chr1	27271399	27271412
ZNF277	activation	chr1	27271068	27271773	SIX1	chr1	27271699	27271709
ZNF277	activation	chr1	27271068	27271773	GATA2	chr1	27271715	27271725
ZNF277	activation	chr1	27272184	27272418	HIF1A	chr1	27272248	27272257
ZNF277	activation	chr1	27272184	27272418	MYC	chr1	27272248	27272259
ZNF277	activation	chr1	27272184	27272418	BHLHE40	chr1	27272249	27272258
ZNF277	activation	chr1	27272184	27272418	HES1	chr1	27272249	27272258
ZNF277	activation	chr1	27272184	27272418	HEY1	chr1	27272249	27272258
ZNF277	activation	chr1	27272184	27272418	HIF1A	chr1	27272250	27272259
ZNF277	activation	chr1	27272184	27272418	HIC2	chr1	27272298	27272306
ZNF277	activation	chr1	27272184	27272418	TCF12	chr1	27272303	27272313
ZNF277	activation	chr1	27272184	27272418	TCF12	chr1	27272304	27272314
ZNF277	activation	chr1	27272184	27272418	MYC	chr1	27272330	27272341
ZNF277	activation	chr1	27272184	27272418	TCF12	chr1	27272330	27272340
ZNF277	activation	chr1	27272184	27272418	TCF12	chr1	27272331	27272341
ZNF277	activation	chr1	27272184	27272418	SOX3	chr1	27272367	27272376
ZNF277	activation	chr1	27272184	27272418	NANOG	chr1	27272368	27272378
ZNF277	activation	chr1	27272184	27272418	SOX13	chr1	27272368	27272378
ZNF277	activation	chr1	27272184	27272418	SOX2	chr1	27272368	27272378
ZNF277	activation	chr1	27272184	27272418	SOX4	chr1	27272368	27272377
ZNF277	activation	chr1	27281523	27281723	TCF12	chr1	27281625	27281635
ZNF277	activation	chr1	27284520	27284753	EOMES	chr1	27284623	27284635
ZNF277	activation	chr1	27284520	27284753	TBX3	chr1	27284626	27284635
ZNF277	activation	chr1	27284520	27284753	MGA	chr1	27284627	27284634
ZNF277	activation	chr1	27284520	27284753	TFAP2A	chr1	27284629	27284642
ZNF277	activation	chr1	27284520	27284753	TFAP2C	chr1	27284629	27284642
ZNF277	activation	chr1	27284520	27284753	TFAP2A	chr1	27284630	27284641
ZNF277	activation	chr1	27284520	27284753	TFAP2C	chr1	27284630	27284641
ZNF277	activation	chr1	27284520	27284753	HIC2	chr1	27284669	27284677
ZNF277	activation	chr1	27339230	27339463	TFAP2A	chr1	27339439	27339452
ZNF277	activation	chr1	27339230	27339463	TFAP2C	chr1	27339439	27339452
ZNF277	activation	chr1	27339230	27339463	TFAP2A	chr1	27339440	27339451
ZNF277	activation	chr1	27523697	27523861	MEIS2	chr1	27523770	27523777
ZNF277	activation	chr1	27523697	27523861	MYC	chr1	27523840	27523851
ZNF277	activation	chr1	27523697	27523861	TCF12	chr1	27523841	27523851
ZNF277	activation	chr1	27523697	27523861	TFAP2A	chr1	27523843	27523854
HMGA2	activation	chr1	34148816	34149301	TCF7L1	chr1	34149046	34149057
HMGA2	activation	chr1	34148816	34149301	TCF7L2	chr1	34149046	34149059
HMGA2	activation	chr1	34148816	34149301	SIX1	chr1	34149103	34149113
HMGA2	activation	chr1	34148816	34149301	ZIC3	chr1	34149174	34149188
HMGA2	activation	chr1	34148816	34149301	ZIC2	chr1	34149209	34149222
HMGA2	activation	chr1	34152373	34152544	ZIC3	chr1	34152392	34152406
HMGA2	activation	chr1	34152373	34152544	GRHL2	chr1	34152414	34152425
HMGA2	activation	chr1	34152373	34152544	TFAP2A	chr1	34152449	34152460
HMGA2	activation	chr1	34152373	34152544	TFAP2C	chr1	34152449	34152460
HMGA2	activation	chr1	34152373	34152544	TFAP2A	chr1	34152480	34152491
HMGA2	activation	chr1	34152373	34152544	TFAP2C	chr1	34152480	34152491
HMGA2	activation	chr1	34152373	34152544	RREB1	chr1	34152493	34152512
HMGA2	activation	chr1	34152373	34152544	ZIC2	chr1	34152518	34152531
HMGA2	activation	chr1	34152373	34152544	ZIC3	chr1	34152519	34152533
HMGA2	activation	chr1	34155150	34155729	TFAP2A	chr1	34155233	34155245
HMGA2	activation	chr1	34155150	34155729	TFAP2C	chr1	34155233	34155245
HMGA2	activation	chr1	34155150	34155729	TFAP2A	chr1	34155234	34155245
HMGA2	activation	chr1	34155150	34155729	TFAP2A	chr1	34155234	34155247
HMGA2	activation	chr1	34155150	34155729	TFAP2C	chr1	34155234	34155245
HMGA2	activation	chr1	34155150	34155729	TFAP2C	chr1	34155234	34155247
HMGA2	activation	chr1	34155150	34155729	CDX2	chr1	34155245	34155256
HMGA2	activation	chr1	34155150	34155729	GRHL2	chr1	34155377	34155388
HMGA2	activation	chr1	34155150	34155729	SOX13	chr1	34155403	34155413
HMGA2	activation	chr1	34155150	34155729	SOX4	chr1	34155403	34155412
HMGA2	activation	chr1	34155150	34155729	SALL1	chr1	34155433	34155443
HMGA2	activation	chr1	34155150	34155729	IRF7	chr1	34155507	34155520
HMGA2	activation	chr1	34155150	34155729	ETS2	chr1	34155544	34155553
HMGA2	activation	chr1	34155150	34155729	EOMES	chr1	34155594	34155606
HMGA2	activation	chr1	34155150	34155729	SOX3	chr1	34155711	34155720
HMGA2	activation	chr1	34157716	34157966	TFAP2A	chr1	34157821	34157834
HMGA2	activation	chr1	34157716	34157966	TFAP2C	chr1	34157821	34157834
HMGA2	activation	chr1	34157716	34157966	TCF12	chr1	34157890	34157900
HMGA2	activation	chr1	34158189	34158479	ZNF423	chr1	34158219	34158233
HMGA2	activation	chr1	34158189	34158479	GBX2	chr1	34158245	34158254
HMGA2	activation	chr1	34158189	34158479	HESX1	chr1	34158245	34158254
HMGA2	activation	chr1	34158189	34158479	MSX1	chr1	34158246	34158253
HMGA2	activation	chr1	34158189	34158479	SOX3	chr1	34158294	34158303
HMGA2	activation	chr1	34158189	34158479	ZIC2	chr1	34158320	34158333
HMGA2	activation	chr1	34158189	34158479	TFAP2A	chr1	34158360	34158372
HMGA2	activation	chr1	34158189	34158479	TFAP2C	chr1	34158360	34158372
HMGA2	activation	chr1	34160010	34160316	CDX2	chr1	34160044	34160055
HMGA2	activation	chr1	34160010	34160316	TFAP2A	chr1	34160115	34160127
HMGA2	activation	chr1	34160010	34160316	TFAP2C	chr1	34160115	34160127
HMGA2	activation	chr1	34160010	34160316	HES1	chr1	34160202	34160211
HMGA2	activation	chr1	34160010	34160316	KLF5	chr1	34160210	34160219
HMGA2	activation	chr1	34160010	34160316	ZIC2	chr1	34160298	34160311
HMGA2	activation	chr1	34161553	34162322	SOX3	chr1	34161682	34161691
HMGA2	activation	chr1	34161553	34162322	SOX3	chr1	34161690	34161699
HMGA2	activation	chr1	34161553	34162322	TFAP2A	chr1	34161742	34161753
HMGA2	activation	chr1	34161553	34162322	TFAP2A	chr1	34161742	34161755
HMGA2	activation	chr1	34161553	34162322	TFAP2C	chr1	34161742	34161753
HMGA2	activation	chr1	34161553	34162322	TFAP2C	chr1	34161742	34161755
HMGA2	activation	chr1	34161553	34162322	GLI2	chr1	34161760	34161774
HMGA2	activation	chr1	34161553	34162322	TCF12	chr1	34161762	34161772
HMGA2	activation	chr1	34161553	34162322	TCF7L2	chr1	34161831	34161844
HMGA2	activation	chr1	34161553	34162322	BACH1	chr1	34161942	34161954
HMGA2	activation	chr1	34161553	34162322	GATA2	chr1	34162019	34162029
HMGA2	activation	chr1	34161553	34162322	ETS2	chr1	34162036	34162045
HMGA2	activation	chr1	34161553	34162322	KLF5	chr1	34162079	34162088
HMGA2	activation	chr1	34161553	34162322	ELF1	chr1	34162097	34162110
HMGA2	activation	chr1	34161553	34162322	SOX3	chr1	34162201	34162210
HMGA2	activation	chr1	34161553	34162322	TCF12	chr1	34162250	34162260
HMGA2	activation	chr1	34161553	34162322	MEIS1	chr1	34162313	34162319
HMGA2	activation	chr1	34163943	34165216	MEIS2	chr1	34163954	34163968
HMGA2	activation	chr1	34163943	34165216	MEIS1	chr1	34163955	34163967
HMGA2	activation	chr1	34163943	34165216	ZIC2	chr1	34164114	34164127
HMGA2	activation	chr1	34163943	34165216	TCF12	chr1	34164116	34164126
HMGA2	activation	chr1	34163943	34165216	TFAP2C	chr1	34164132	34164143
HMGA2	activation	chr1	34163943	34165216	HIF1A	chr1	34164191	34164200
HMGA2	activation	chr1	34163943	34165216	MYC	chr1	34164191	34164202
HMGA2	activation	chr1	34163943	34165216	MYCN	chr1	34164191	34164202
HMGA2	activation	chr1	34163943	34165216	BHLHE40	chr1	34164192	34164201
HMGA2	activation	chr1	34163943	34165216	HES1	chr1	34164192	34164201
HMGA2	activation	chr1	34163943	34165216	HEY1	chr1	34164192	34164201
HMGA2	activation	chr1	34163943	34165216	NANOG	chr1	34164318	34164328
HMGA2	activation	chr1	34163943	34165216	SOX13	chr1	34164318	34164328
HMGA2	activation	chr1	34163943	34165216	SOX2	chr1	34164318	34164328
HMGA2	activation	chr1	34163943	34165216	ELF1	chr1	34164490	34164503
HMGA2	activation	chr1	34163943	34165216	ZIC2	chr1	34164491	34164504
HMGA2	activation	chr1	34163943	34165216	ETS2	chr1	34164562	34164571
HMGA2	activation	chr1	34163943	34165216	MSX1	chr1	34164668	34164675
HMGA2	activation	chr1	34163943	34165216	LMX1B	chr1	34164669	34164679
HMGA2	activation	chr1	34163943	34165216	LMX1B	chr1	34164672	34164682
HMGA2	activation	chr1	34163943	34165216	ZNF821	chr1	34164795	34164809
HMGA2	activation	chr1	34163943	34165216	TCF7L2	chr1	34164857	34164870
HMGA2	activation	chr1	34163943	34165216	TCF7L1	chr1	34164859	34164870
HMGA2	activation	chr1	34163943	34165216	MGA	chr1	34164886	34164893
HMGA2	activation	chr1	34163943	34165216	GATA2	chr1	34164899	34164909
HMGA2	activation	chr1	34163943	34165216	GBX2	chr1	34165009	34165018
HMGA2	activation	chr1	34163943	34165216	HESX1	chr1	34165009	34165018
HMGA2	activation	chr1	34163943	34165216	HOXA1	chr1	34165010	34165017
HMGA2	activation	chr1	34163943	34165216	HOXB1	chr1	34165010	34165017
HMGA2	activation	chr1	34163943	34165216	LHX5	chr1	34165010	34165017
HMGA2	activation	chr1	34163943	34165216	CEBPB	chr1	34165126	34165135
HMGA2	activation	chr1	34163943	34165216	BACH1	chr1	34165134	34165146
HMGA2	activation	chr1	34163943	34165216	TCF12	chr1	34165156	34165166
HMGA2	activation	chr1	34169871	34170053	HIC2	chr1	34169958	34169966
HMGA2	activation	chr1	34169871	34170053	GRHL2	chr1	34169982	34169993
HMGA2	repression_index_5	chr1	34174544	34174744	ZNF423	chr1	34174647	34174661
HMGA2	repression_index_5	chr1	34174544	34174744	EOMES	chr1	34174711	34174723
HMGA2	activation	chr1	34196960	34197814	ZIC3	chr1	34197029	34197043
HMGA2	activation	chr1	34196960	34197814	KLF5	chr1	34197068	34197077
HMGA2	activation	chr1	34196960	34197814	ZIC2	chr1	34197073	34197086
HMGA2	activation	chr1	34196960	34197814	ZIC2	chr1	34197123	34197136
HMGA2	activation	chr1	34196960	34197814	ZIC2	chr1	34197160	34197173
HMGA2	activation	chr1	34196960	34197814	TCF12	chr1	34197267	34197277
HMGA2	activation	chr1	34196960	34197814	TCF12	chr1	34197268	34197278
HMGA2	activation	chr1	34196960	34197814	ZIC2	chr1	34197285	34197298
HMGA2	activation	chr1	34196960	34197814	TCF12	chr1	34197289	34197299
HMGA2	activation	chr1	34196960	34197814	TCF12	chr1	34197290	34197300
HMGA2	activation	chr1	34196960	34197814	MEIS2	chr1	34197464	34197471
HMGA2	activation	chr1	34196960	34197814	TCF12	chr1	34197495	34197505
HMGA2	activation	chr1	34196960	34197814	TCF12	chr1	34197496	34197506
HMGA2	activation	chr1	34196960	34197814	ZIC2	chr1	34197542	34197555
HMGA2	activation	chr1	34196960	34197814	TCF12	chr1	34197677	34197687
HMGA2	activation	chr1	34196960	34197814	SOX4	chr1	34197774	34197783
HMGA2	activation	chr1	34196960	34197814	SOX3	chr1	34197775	34197784
HMGA2	activation	chr1	34198338	34198614	TFAP2A	chr1	34198423	34198435
HMGA2	activation	chr1	34198338	34198614	ZIC2	chr1	34198423	34198436
HMGA2	activation	chr1	34198338	34198614	RREB1	chr1	34198429	34198448
HMGA2	activation	chr1	34198338	34198614	KLF5	chr1	34198431	34198440
HMGA2	activation	chr1	34198338	34198614	TFAP2A	chr1	34198487	34198500
HMGA2	activation	chr1	34198338	34198614	TFAP2A	chr1	34198488	34198501
HMGA2	activation	chr1	34198338	34198614	TFAP2C	chr1	34198488	34198501
HMGA2	activation	chr1	34198338	34198614	GLI2	chr1	34198554	34198568
HMGA2	activation	chr1	34198338	34198614	MYC	chr1	34198591	34198602
HMGA2	activation	chr1	34200449	34206658	ETS2	chr1	34200480	34200489
HMGA2	activation	chr1	34200449	34206658	ZIC2	chr1	34200575	34200588
HMGA2	activation	chr1	34200449	34206658	MYC	chr1	34200670	34200681
HMGA2	activation	chr1	34200449	34206658	MYCN	chr1	34200670	34200681
HMGA2	activation	chr1	34200449	34206658	ZIC2	chr1	34200776	34200789
HMGA2	activation	chr1	34200449	34206658	HESX1	chr1	34200794	34200803
HMGA2	activation	chr1	34200449	34206658	SALL1	chr1	34200896	34200903
HMGA2	activation	chr1	34200449	34206658	ZIC2	chr1	34201083	34201096
HMGA2	activation	chr1	34200449	34206658	TFAP2A	chr1	34201309	34201322
HMGA2	activation	chr1	34200449	34206658	TFAP2C	chr1	34201309	34201322
HMGA2	activation	chr1	34200449	34206658	TFAP2A	chr1	34201310	34201323
HMGA2	activation	chr1	34200449	34206658	TFAP2A	chr1	34201310	34201321
HMGA2	activation	chr1	34200449	34206658	TFAP2C	chr1	34201310	34201323
HMGA2	activation	chr1	34200449	34206658	KLF5	chr1	34201521	34201530
HMGA2	activation	chr1	34200449	34206658	GATA2	chr1	34201738	34201748
HMGA2	activation	chr1	34200449	34206658	KLF5	chr1	34201753	34201762
HMGA2	activation	chr1	34200449	34206658	ZIC2	chr1	34201822	34201835
HMGA2	activation	chr1	34200449	34206658	ZIC2	chr1	34201853	34201866
HMGA2	activation	chr1	34200449	34206658	TFAP2A	chr1	34201940	34201951
HMGA2	activation	chr1	34200449	34206658	MYCN	chr1	34202037	34202048
HMGA2	activation	chr1	34200449	34206658	PITX2	chr1	34202045	34202052
HMGA2	activation	chr1	34200449	34206658	SIX1	chr1	34202076	34202086
HMGA2	activation	chr1	34200449	34206658	DLX5	chr1	34202088	34202095
HMGA2	activation	chr1	34200449	34206658	MSX1	chr1	34202088	34202095
HMGA2	activation	chr1	34200449	34206658	TCF7L2	chr1	34202125	34202138
HMGA2	activation	chr1	34200449	34206658	MEIS2	chr1	34202133	34202147
HMGA2	activation	chr1	34200449	34206658	CDX2	chr1	34202146	34202157
HMGA2	activation	chr1	34200449	34206658	SALL1	chr1	34202149	34202159
HMGA2	activation	chr1	34200449	34206658	TCF12	chr1	34202222	34202232
HMGA2	activation	chr1	34200449	34206658	TCF12	chr1	34202349	34202359
HMGA2	activation	chr1	34200449	34206658	ZNF821	chr1	34202361	34202375
HMGA2	activation	chr1	34200449	34206658	TCF12	chr1	34202535	34202545
HMGA2	activation	chr1	34200449	34206658	TFAP2A	chr1	34202823	34202836
HMGA2	activation	chr1	34200449	34206658	TFAP2C	chr1	34202823	34202836
HMGA2	activation	chr1	34200449	34206658	TFAP2C	chr1	34202839	34202852
HMGA2	activation	chr1	34200449	34206658	TFAP2A	chr1	34202886	34202897
HMGA2	activation	chr1	34200449	34206658	TFAP2C	chr1	34202886	34202897
HMGA2	activation	chr1	34200449	34206658	TFAP2C	chr1	34202886	34202899
HMGA2	activation	chr1	34200449	34206658	TFAP2A	chr1	34202915	34202926
HMGA2	activation	chr1	34200449	34206658	TFAP2A	chr1	34202950	34202962
HMGA2	activation	chr1	34200449	34206658	TFAP2C	chr1	34202950	34202962
HMGA2	activation	chr1	34200449	34206658	TFAP2C	chr1	34202950	34202963
HMGA2	activation	chr1	34200449	34206658	TFAP2A	chr1	34202951	34202962
HMGA2	activation	chr1	34200449	34206658	TFAP2C	chr1	34202951	34202962
HMGA2	activation	chr1	34200449	34206658	TFAP2C	chr1	34202957	34202970
HMGA2	activation	chr1	34200449	34206658	TFAP2A	chr1	34202958	34202969
HMGA2	activation	chr1	34200449	34206658	TCF12	chr1	34202972	34202982
HMGA2	activation	chr1	34200449	34206658	TFAP2A	chr1	34202982	34202994
HMGA2	activation	chr1	34200449	34206658	TFAP2C	chr1	34202982	34202994
HMGA2	activation	chr1	34200449	34206658	TFAP2A	chr1	34202996	34203007
HMGA2	activation	chr1	34200449	34206658	TFAP2C	chr1	34202996	34203007
HMGA2	activation	chr1	34200449	34206658	SOX4	chr1	34203022	34203031
HMGA2	activation	chr1	34200449	34206658	SOX3	chr1	34203023	34203032
HMGA2	activation	chr1	34200449	34206658	MYC	chr1	34203048	34203059
HMGA2	activation	chr1	34200449	34206658	MYCN	chr1	34203048	34203059
HMGA2	activation	chr1	34200449	34206658	HES1	chr1	34203049	34203058
HMGA2	activation	chr1	34200449	34206658	HEY1	chr1	34203049	34203058
HMGA2	activation	chr1	34200449	34206658	TCF12	chr1	34203049	34203059
HMGA2	activation	chr1	34200449	34206658	HIF1A	chr1	34203050	34203059
HMGA2	activation	chr1	34200449	34206658	TFAP2A	chr1	34203097	34203109
HMGA2	activation	chr1	34200449	34206658	KLF5	chr1	34203458	34203467
HMGA2	activation	chr1	34200449	34206658	TFAP2C	chr1	34203569	34203582
HMGA2	activation	chr1	34200449	34206658	TFAP2A	chr1	34203570	34203581
HMGA2	activation	chr1	34200449	34206658	ZIC2	chr1	34203596	34203609
HMGA2	activation	chr1	34200449	34206658	NFKB2	chr1	34203661	34203673
HMGA2	activation	chr1	34200449	34206658	KLF5	chr1	34203901	34203910
HMGA2	activation	chr1	34200449	34206658	TFAP2A	chr1	34204094	34204105
HMGA2	activation	chr1	34200449	34206658	TFAP2C	chr1	34204094	34204105
HMGA2	activation	chr1	34200449	34206658	ELF1	chr1	34204145	34204158
HMGA2	activation	chr1	34200449	34206658	TCF12	chr1	34204181	34204191
HMGA2	activation	chr1	34200449	34206658	TFAP2C	chr1	34204199	34204212
HMGA2	activation	chr1	34200449	34206658	TFAP2C	chr1	34204291	34204304
HMGA2	activation	chr1	34200449	34206658	TFAP2A	chr1	34204292	34204303
HMGA2	activation	chr1	34200449	34206658	TFAP2A	chr1	34204292	34204304
HMGA2	activation	chr1	34200449	34206658	TFAP2C	chr1	34204292	34204304
HMGA2	activation	chr1	34200449	34206658	TFAP2C	chr1	34204292	34204303
HMGA2	activation	chr1	34200449	34206658	TFAP2A	chr1	34204293	34204305
HMGA2	activation	chr1	34200449	34206658	TFAP2C	chr1	34204293	34204305
HMGA2	activation	chr1	34200449	34206658	CEBPB	chr1	34204324	34204333
HMGA2	activation	chr1	34200449	34206658	TFAP2A	chr1	34204411	34204423
HMGA2	activation	chr1	34200449	34206658	KLF5	chr1	34204580	34204589
HMGA2	activation	chr1	34200449	34206658	ZIC2	chr1	34204586	34204599
HMGA2	activation	chr1	34200449	34206658	TFAP2A	chr1	34204631	34204643
HMGA2	activation	chr1	34200449	34206658	TFAP2C	chr1	34204631	34204643
HMGA2	activation	chr1	34200449	34206658	NFKB2	chr1	34204637	34204649
HMGA2	activation	chr1	34200449	34206658	TFAP2A	chr1	34204701	34204714
HMGA2	activation	chr1	34200449	34206658	TFAP2C	chr1	34204701	34204714
HMGA2	activation	chr1	34200449	34206658	TFAP2A	chr1	34204703	34204714
HMGA2	activation	chr1	34200449	34206658	TFAP2C	chr1	34204703	34204714
HMGA2	activation	chr1	34200449	34206658	TFAP2C	chr1	34204709	34204722
HMGA2	activation	chr1	34200449	34206658	TFAP2A	chr1	34204710	34204721
HMGA2	activation	chr1	34200449	34206658	NANOG	chr1	34204798	34204808
HMGA2	activation	chr1	34200449	34206658	SOX13	chr1	34204798	34204808
HMGA2	activation	chr1	34200449	34206658	SOX2	chr1	34204798	34204808
HMGA2	activation	chr1	34200449	34206658	TFAP2A	chr1	34204812	34204824
HMGA2	activation	chr1	34200449	34206658	TFAP2A	chr1	34204933	34204944
HMGA2	activation	chr1	34200449	34206658	TFAP2C	chr1	34204950	34204963
HMGA2	activation	chr1	34200449	34206658	SALL1	chr1	34205108	34205118
HMGA2	activation	chr1	34200449	34206658	SALL1	chr1	34205112	34205122
HMGA2	activation	chr1	34200449	34206658	SOX3	chr1	34205170	34205179
HMGA2	activation	chr1	34200449	34206658	IRF7	chr1	34205174	34205187
HMGA2	activation	chr1	34200449	34206658	SALL1	chr1	34205215	34205225
HMGA2	activation	chr1	34200449	34206658	SOX3	chr1	34205242	34205251
HMGA2	activation	chr1	34200449	34206658	TFAP2A	chr1	34205320	34205332
HMGA2	activation	chr1	34200449	34206658	TFAP2C	chr1	34205320	34205332
HMGA2	activation	chr1	34200449	34206658	TFAP2A	chr1	34205341	34205353
HMGA2	activation	chr1	34200449	34206658	TFAP2C	chr1	34205341	34205353
HMGA2	activation	chr1	34200449	34206658	ZIC3	chr1	34205342	34205356
HMGA2	activation	chr1	34200449	34206658	KLF5	chr1	34205349	34205358
HMGA2	activation	chr1	34200449	34206658	SOX4	chr1	34205424	34205433
HMGA2	activation	chr1	34200449	34206658	HIC2	chr1	34205555	34205563
HMGA2	activation	chr1	34200449	34206658	ZIC2	chr1	34205569	34205582
HMGA2	activation	chr1	34200449	34206658	ELF1	chr1	34205570	34205583
HMGA2	activation	chr1	34200449	34206658	SALL1	chr1	34205720	34205727
HMGA2	activation	chr1	34200449	34206658	EOMES	chr1	34205727	34205739
HMGA2	activation	chr1	34200449	34206658	TBX3	chr1	34205727	34205736
HMGA2	activation	chr1	34200449	34206658	MGA	chr1	34205728	34205735
HMGA2	activation	chr1	34200449	34206658	IRF7	chr1	34205851	34205864
HMGA2	activation	chr1	34200449	34206658	TCF7L2	chr1	34206342	34206355
HMGA2	activation	chr1	34200449	34206658	IRF7	chr1	34206346	34206359
HMGA2	activation	chr1	34200449	34206658	ZIC2	chr1	34206521	34206534
HMGA2	activation	chr1	34206892	34207191	ELF1	chr1	34207031	34207044
HMGA2	activation	chr1	34206892	34207191	TCF7L1	chr1	34207133	34207144
HMGA2	activation	chr1	34211172	34211378	OTX2	chr1	34211218	34211229
HMGA2	activation	chr1	34211172	34211378	GBX2	chr1	34211251	34211260
HMGA2	activation	chr1	34211172	34211378	DLX5	chr1	34211252	34211259
HMGA2	activation	chr1	34211172	34211378	MSX1	chr1	34211252	34211259
HMGA2	activation	chr1	34211172	34211378	TCF12	chr1	34211266	34211276
HMGA2	activation	chr1	34211867	34212099	BACH1	chr1	34212040	34212052
HMGA2	activation	chr1	34223160	34223377	ZIC2	chr1	34223160	34223173
HMGA2	activation	chr1	34223160	34223377	MEIS2	chr1	34223314	34223321
HMGA2	activation	chr1	34224311	34224661	NANOG	chr1	34224371	34224381
HMGA2	activation	chr1	34224311	34224661	SOX13	chr1	34224371	34224381
HMGA2	activation	chr1	34224311	34224661	SOX3	chr1	34224525	34224534
HMGA2	activation	chr1	34224311	34224661	KLF6	chr1	34224603	34224613
HMGA2	activation	chr1	34236472	34236655	ELF1	chr1	34236569	34236582
HMGA2	activation	chr1	34236472	34236655	KLF5	chr1	34236569	34236578
HMGA2	activation	chr1	34237220	34237435	SOX3	chr1	34237256	34237265
HMGA2	activation	chr1	34244403	34245001	ELF1	chr1	34244481	34244494
HMGA2	activation	chr1	34244403	34245001	ETV5	chr1	34244483	34244493
HMGA2	activation	chr1	34244403	34245001	TCF12	chr1	34244494	34244504
HMGA2	activation	chr1	34244403	34245001	KLF5	chr1	34244586	34244595
HMGA2	activation	chr1	34244403	34245001	EOMES	chr1	34244696	34244708
HMGA2	activation	chr1	34244403	34245001	TBX3	chr1	34244699	34244708
HMGA2	activation	chr1	34244403	34245001	MGA	chr1	34244700	34244707
HMGA2	activation	chr1	34244403	34245001	ZIC2	chr1	34244816	34244829
HMGA2	activation	chr1	34245707	34247452	TFAP2A	chr1	34245823	34245835
HMGA2	activation	chr1	34245707	34247452	TFAP2C	chr1	34245823	34245835
HMGA2	activation	chr1	34245707	34247452	BACH1	chr1	34245850	34245862
HMGA2	activation	chr1	34245707	34247452	TCF12	chr1	34246356	34246366
HMGA2	activation	chr1	34245707	34247452	MEIS2	chr1	34246438	34246452
HMGA2	activation	chr1	34245707	34247452	MEIS1	chr1	34246439	34246451
HMGA2	activation	chr1	34245707	34247452	MEIS2	chr1	34246466	34246480
HMGA2	activation	chr1	34245707	34247452	MEIS1	chr1	34246467	34246479
HMGA2	activation	chr1	34245707	34247452	ELF1	chr1	34246475	34246488
HMGA2	activation	chr1	34245707	34247452	SOX4	chr1	34246489	34246498
HMGA2	activation	chr1	34245707	34247452	TFAP2A	chr1	34246519	34246532
HMGA2	activation	chr1	34245707	34247452	TFAP2C	chr1	34246519	34246532
HMGA2	activation	chr1	34245707	34247452	NANOG	chr1	34246530	34246540
HMGA2	activation	chr1	34245707	34247452	SOX13	chr1	34246530	34246540
HMGA2	activation	chr1	34245707	34247452	SOX2	chr1	34246530	34246540
HMGA2	activation	chr1	34245707	34247452	SOX4	chr1	34246531	34246540
HMGA2	activation	chr1	34245707	34247452	GATA2	chr1	34246549	34246559
HMGA2	activation	chr1	34245707	34247452	ZIC2	chr1	34246619	34246632
HMGA2	activation	chr1	34245707	34247452	ZIC2	chr1	34246730	34246743
HMGA2	activation	chr1	34245707	34247452	TCF12	chr1	34246998	34247008
HMGA2	activation	chr1	34245707	34247452	TCF12	chr1	34246999	34247009
HMGA2	activation	chr1	34245707	34247452	SIX3	chr1	34247039	34247055
HMGA2	activation	chr1	34245707	34247452	TCF12	chr1	34247216	34247226
HMGA2	activation	chr1	34245707	34247452	MYC	chr1	34247393	34247404
HMGA2	activation	chr1	34247779	34248448	SOX4	chr1	34247928	34247937
HMGA2	activation	chr1	34247779	34248448	SOX3	chr1	34247929	34247938
HMGA2	activation	chr1	34247779	34248448	HIC2	chr1	34248001	34248009
HMGA2	activation	chr1	34247779	34248448	TCF12	chr1	34248271	34248281
HMGA2	activation	chr1	34247779	34248448	TCF12	chr1	34248272	34248282
HMGA2	activation	chr1	34247779	34248448	ZNF821	chr1	34248325	34248339
HMGA2	activation	chr1	34247779	34248448	SIX3	chr1	34248345	34248361
HMGA2	activation	chr1	34249009	34249516	TCF12	chr1	34249077	34249087
HMGA2	activation	chr1	34249009	34249516	TCF12	chr1	34249078	34249088
HMGA2	activation	chr1	34249009	34249516	HIC2	chr1	34249101	34249109
HMGA2	activation	chr1	34249009	34249516	SIX3	chr1	34249375	34249391
HMGA2	activation	chr1	34249009	34249516	ZIC2	chr1	34249433	34249446
HMGA2	activation	chr1	34249009	34249516	TCF12	chr1	34249434	34249444
HMGA2	activation	chr1	34249009	34249516	MGA	chr1	34249457	34249464
HMGA2	activation	chr1	34251848	34252621	SOX3	chr1	34251852	34251861
HMGA2	activation	chr1	34251848	34252621	OTX2	chr1	34251970	34251981
HMGA2	activation	chr1	34251848	34252621	PITX2	chr1	34251972	34251979
HMGA2	activation	chr1	34251848	34252621	TCF7L2	chr1	34251988	34252001
HMGA2	activation	chr1	34251848	34252621	PITX2	chr1	34252007	34252014
HMGA2	activation	chr1	34251848	34252621	BACH1	chr1	34252011	34252023
HMGA2	activation	chr1	34251848	34252621	FOXA2	chr1	34252024	34252034
HMGA2	activation	chr1	34251848	34252621	LMX1B	chr1	34252131	34252141
HMGA2	activation	chr1	34251848	34252621	LHX5	chr1	34252134	34252141
HMGA2	activation	chr1	34251848	34252621	LMX1B	chr1	34252134	34252144
HMGA2	activation	chr1	34251848	34252621	NKX6-2	chr1	34252134	34252141
HMGA2	activation	chr1	34251848	34252621	TCF12	chr1	34252174	34252184
HMGA2	activation	chr1	34251848	34252621	HOXB1	chr1	34252262	34252269
HMGA2	activation	chr1	34251848	34252621	LHX5	chr1	34252262	34252269
HMGA2	activation	chr1	34251848	34252621	LMX1B	chr1	34252262	34252272
HMGA2	activation	chr1	34251848	34252621	HIC2	chr1	34252444	34252452
HMGA2	activation	chr1	34251848	34252621	SOX3	chr1	34252578	34252587
HMGA2	activation	chr1	34251848	34252621	SOX4	chr1	34252579	34252588
HMGA2	activation	chr1	34251848	34252621	TCF12	chr1	34252603	34252613
HMGA2	activation	chr1	34254333	34254857	TCF12	chr1	34254450	34254460
HMGA2	activation	chr1	34254333	34254857	MYC	chr1	34254471	34254482
HMGA2	activation	chr1	34254333	34254857	TFAP2C	chr1	34254497	34254510
HMGA2	activation	chr1	34254333	34254857	ZIC2	chr1	34254497	34254510
HMGA2	activation	chr1	34254333	34254857	ZIC2	chr1	34254528	34254541
HMGA2	activation	chr1	34254333	34254857	GRHL2	chr1	34254531	34254542
HMGA2	activation	chr1	34254333	34254857	SOX3	chr1	34254774	34254783
HMGA2	activation	chr1	34254333	34254857	SOX4	chr1	34254775	34254784
HMGA2	activation	chr1	34255691	34256412	TFAP2A	chr1	34255726	34255737
HMGA2	activation	chr1	34255691	34256412	TFAP2C	chr1	34255726	34255737
HMGA2	activation	chr1	34255691	34256412	SIX1	chr1	34255845	34255855
HMGA2	activation	chr1	34255691	34256412	KLF5	chr1	34255939	34255948
HMGA2	activation	chr1	34255691	34256412	TCF12	chr1	34255961	34255971
HMGA2	activation	chr1	34255691	34256412	RREB1	chr1	34256073	34256092
HMGA2	activation	chr1	34255691	34256412	ZIC3	chr1	34256084	34256098
HMGA2	activation	chr1	34255691	34256412	TFAP2A	chr1	34256178	34256190
HMGA2	activation	chr1	34255691	34256412	TFAP2C	chr1	34256178	34256190
HMGA2	activation	chr1	34255691	34256412	TCF12	chr1	34256312	34256322
HMGA2	activation	chr1	34256696	34257282	MYC	chr1	34256823	34256834
HMGA2	activation	chr1	34256696	34257282	BHLHE40	chr1	34256824	34256833
HMGA2	activation	chr1	34256696	34257282	HES1	chr1	34256824	34256833
HMGA2	activation	chr1	34256696	34257282	HEY1	chr1	34256824	34256833
HMGA2	activation	chr1	34256696	34257282	TCF12	chr1	34256887	34256897
HMGA2	activation	chr1	34256696	34257282	ZIC2	chr1	34256918	34256931
HMGA2	activation	chr1	34256696	34257282	SOX3	chr1	34256944	34256953
HMGA2	activation	chr1	34256696	34257282	ELF1	chr1	34257012	34257025
HMGA2	activation	chr1	34256696	34257282	TFAP2A	chr1	34257083	34257096
HMGA2	activation	chr1	34256696	34257282	TFAP2C	chr1	34257083	34257096
HMGA2	activation	chr1	34256696	34257282	ELF1	chr1	34257096	34257109
HMGA2	activation	chr1	34256696	34257282	ETS2	chr1	34257099	34257108
HMGA2	activation	chr1	34256696	34257282	ELF1	chr1	34257256	34257269
HMGA2	activation	chr1	34256696	34257282	EOMES	chr1	34257270	34257282
HMGA2	activation	chr1	34259435	34259867	TBX3	chr1	34259541	34259550
HMGA2	activation	chr1	34259435	34259867	MGA	chr1	34259542	34259549
HMGA2	activation	chr1	34263432	34263654	MEIS2	chr1	34263625	34263632
HMGA2	activation	chr1	34264996	34265247	GATA2	chr1	34265007	34265017
HMGA2	activation	chr1	34264996	34265247	SIX3	chr1	34265019	34265035
HMGA2	activation	chr1	34264996	34265247	ELF1	chr1	34265027	34265040
HMGA2	activation	chr1	34265759	34266007	MEIS1	chr1	34265796	34265808
HMGA2	activation	chr1	34265759	34266007	TCF12	chr1	34265847	34265857
HMGA2	activation	chr1	34265759	34266007	CEBPB	chr1	34265925	34265934
HMGA2	activation	chr1	34266506	34267477	KLF5	chr1	34266578	34266587
HMGA2	activation	chr1	34266506	34267477	ZIC2	chr1	34266650	34266663
HMGA2	activation	chr1	34266506	34267477	KLF5	chr1	34266663	34266672
HMGA2	activation	chr1	34266506	34267477	ZIC2	chr1	34266731	34266744
HMGA2	activation	chr1	34266506	34267477	TCF12	chr1	34266732	34266742
HMGA2	activation	chr1	34266506	34267477	ZIC2	chr1	34266786	34266799
HMGA2	activation	chr1	34266506	34267477	TFAP2A	chr1	34266812	34266825
HMGA2	activation	chr1	34266506	34267477	TFAP2C	chr1	34266812	34266825
HMGA2	activation	chr1	34266506	34267477	TFAP2A	chr1	34266813	34266826
HMGA2	activation	chr1	34266506	34267477	SOX3	chr1	34266881	34266890
HMGA2	activation	chr1	34266506	34267477	TFAP2A	chr1	34266884	34266897
HMGA2	activation	chr1	34266506	34267477	TFAP2C	chr1	34266884	34266897
HMGA2	activation	chr1	34266506	34267477	ELF1	chr1	34267167	34267180
HMGA2	activation	chr1	34266506	34267477	DLX5	chr1	34267271	34267278
HMGA2	activation	chr1	34266506	34267477	TCF7L2	chr1	34267371	34267384
HMGA2	activation	chr1	34266506	34267477	CDX2	chr1	34267441	34267452
HMGA2	activation	chr1	34282188	34282445	BACH1	chr1	34282298	34282310
HMGA2	activation	chr1	34282188	34282445	TCF12	chr1	34282328	34282338
HMGA2	activation	chr1	34282188	34282445	TCF12	chr1	34282329	34282339
HMGA2	activation	chr1	34284140	34284581	TCF7L2	chr1	34284164	34284177
HMGA2	activation	chr1	34284140	34284581	TCF7L1	chr1	34284166	34284177
HMGA2	activation	chr1	34284140	34284581	ZIC2	chr1	34284213	34284226
HMGA2	activation	chr1	34284140	34284581	ELF1	chr1	34284310	34284323
HMGA2	activation	chr1	34284140	34284581	MEIS2	chr1	34284451	34284458
HMGA2	activation	chr1	34284140	34284581	SOX3	chr1	34284503	34284512
HMGA2	activation	chr1	34284140	34284581	SOX4	chr1	34284504	34284513
HMGA2	activation	chr1	34285916	34288821	SALL1	chr1	34286153	34286163
HMGA2	activation	chr1	34285916	34288821	SOX3	chr1	34286199	34286208
HMGA2	activation	chr1	34285916	34288821	TCF7L2	chr1	34286256	34286269
HMGA2	activation	chr1	34285916	34288821	SOX3	chr1	34286293	34286302
HMGA2	activation	chr1	34285916	34288821	TCF7L2	chr1	34286375	34286388
HMGA2	activation	chr1	34285916	34288821	HES1	chr1	34286619	34286628
HMGA2	activation	chr1	34285916	34288821	OTX2	chr1	34286640	34286651
HMGA2	activation	chr1	34285916	34288821	MEIS2	chr1	34286763	34286770
HMGA2	activation	chr1	34285916	34288821	SALL1	chr1	34286947	34286957
HMGA2	activation	chr1	34285916	34288821	SOX3	chr1	34286958	34286967
HMGA2	activation	chr1	34285916	34288821	SOX3	chr1	34286963	34286972
HMGA2	activation	chr1	34285916	34288821	RREB1	chr1	34286964	34286983
HMGA2	activation	chr1	34285916	34288821	TFAP2A	chr1	34287016	34287029
HMGA2	activation	chr1	34285916	34288821	TFAP2C	chr1	34287016	34287029
HMGA2	activation	chr1	34285916	34288821	TCF12	chr1	34287121	34287131
HMGA2	activation	chr1	34285916	34288821	TCF12	chr1	34287122	34287132
HMGA2	activation	chr1	34285916	34288821	SOX3	chr1	34287427	34287436
HMGA2	activation	chr1	34285916	34288821	SOX4	chr1	34287428	34287437
HMGA2	activation	chr1	34285916	34288821	DLX5	chr1	34287477	34287484
HMGA2	activation	chr1	34285916	34288821	HOXA1	chr1	34287477	34287484
HMGA2	activation	chr1	34285916	34288821	HOXB1	chr1	34287477	34287484
HMGA2	activation	chr1	34285916	34288821	LHX5	chr1	34287477	34287484
HMGA2	activation	chr1	34285916	34288821	SOX4	chr1	34287510	34287519
HMGA2	activation	chr1	34285916	34288821	TBX3	chr1	34287570	34287579
HMGA2	activation	chr1	34285916	34288821	MEIS2	chr1	34287703	34287717
HMGA2	activation	chr1	34285916	34288821	SALL1	chr1	34287705	34287715
HMGA2	activation	chr1	34285916	34288821	TFAP2A	chr1	34287729	34287742
HMGA2	activation	chr1	34285916	34288821	TFAP2C	chr1	34287729	34287742
HMGA2	activation	chr1	34285916	34288821	TFAP2A	chr1	34287730	34287743
HMGA2	activation	chr1	34285916	34288821	TFAP2C	chr1	34287730	34287743
HMGA2	activation	chr1	34285916	34288821	FOXA2	chr1	34287796	34287806
HMGA2	activation	chr1	34285916	34288821	SOX4	chr1	34287800	34287809
HMGA2	activation	chr1	34285916	34288821	OTX2	chr1	34288046	34288057
HMGA2	activation	chr1	34285916	34288821	PITX2	chr1	34288048	34288055
HMGA2	activation	chr1	34285916	34288821	ELF1	chr1	34288060	34288073
HMGA2	activation	chr1	34285916	34288821	RREB1	chr1	34288125	34288144
HMGA2	activation	chr1	34285916	34288821	SOX3	chr1	34288179	34288188
HMGA2	activation	chr1	34285916	34288821	GATA2	chr1	34288208	34288218
HMGA2	activation	chr1	34285916	34288821	TBX3	chr1	34288256	34288265
HMGA2	activation	chr1	34285916	34288821	MGA	chr1	34288257	34288264
HMGA2	activation	chr1	34285916	34288821	KLF5	chr1	34288321	34288330
HMGA2	activation	chr1	34285916	34288821	MYC	chr1	34288461	34288472
HMGA2	activation	chr1	34285916	34288821	TCF12	chr1	34288461	34288471
HMGA2	activation	chr1	34285916	34288821	TCF12	chr1	34288462	34288472
HMGA2	activation	chr1	34285916	34288821	HIC2	chr1	34288466	34288474
HMGA2	activation	chr1	34285916	34288821	MEIS2	chr1	34288513	34288520
HMGA2	activation	chr1	34285916	34288821	RREB1	chr1	34288524	34288543
HMGA2	activation	chr1	34285916	34288821	TFAP2A	chr1	34288605	34288618
HMGA2	activation	chr1	34285916	34288821	TFAP2C	chr1	34288605	34288618
HMGA2	activation	chr1	34285916	34288821	KLF5	chr1	34288713	34288722
HMGA2	activation	chr1	34289233	34289471	TCF12	chr1	34289369	34289379
HMGA2	activation	chr1	34289756	34289932	HIF1A	chr1	34289783	34289792
HMGA2	activation	chr1	34289756	34289932	MYC	chr1	34289783	34289794
HMGA2	activation	chr1	34289756	34289932	BHLHE40	chr1	34289784	34289793
HMGA2	activation	chr1	34289756	34289932	HEY1	chr1	34289784	34289793
HMGA2	activation	chr1	34289756	34289932	HIF1A	chr1	34289785	34289794
HMGA2	activation	chr1	34289756	34289932	GLI2	chr1	34289804	34289818
HMGA2	activation	chr1	34289756	34289932	TBX3	chr1	34289805	34289814
HMGA2	activation	chr1	34289756	34289932	HIC2	chr1	34289811	34289819
HMGA2	activation	chr1	34289756	34289932	KLF5	chr1	34289819	34289828
HMGA2	activation	chr1	34289756	34289932	BACH1	chr1	34289899	34289911
HMGA2	activation	chr1	34289756	34289932	BACH1	chr1	34289901	34289913
HMGA2	activation	chr1	34290381	34291329	HIC2	chr1	34290491	34290499
HMGA2	activation	chr1	34290381	34291329	ELF1	chr1	34290623	34290636
HMGA2	activation	chr1	34290381	34291329	TCF12	chr1	34290843	34290853
HMGA2	activation	chr1	34290381	34291329	SOX3	chr1	34290950	34290959
HMGA2	activation	chr1	34290381	34291329	OTX2	chr1	34291080	34291091
HMGA2	activation	chr1	34290381	34291329	TFAP2A	chr1	34291089	34291102
HMGA2	activation	chr1	34290381	34291329	TFAP2A	chr1	34291090	34291103
HMGA2	activation	chr1	34290381	34291329	TFAP2A	chr1	34291090	34291101
HMGA2	activation	chr1	34290381	34291329	TFAP2C	chr1	34291090	34291103
HMGA2	activation	chr1	34290381	34291329	TFAP2C	chr1	34291090	34291101
HMGA2	activation	chr1	34290381	34291329	PITX2	chr1	34291262	34291269
HMGA2	activation	chr1	34290381	34291329	ZIC2	chr1	34291288	34291301
HMGA2	activation	chr1	34292963	34293907	ZIC2	chr1	34293083	34293096
HMGA2	activation	chr1	34292963	34293907	SOX4	chr1	34293112	34293121
HMGA2	activation	chr1	34292963	34293907	TCF7L2	chr1	34293254	34293267
HMGA2	activation	chr1	34292963	34293907	FOXA2	chr1	34293517	34293527
HMGA2	activation	chr1	34292963	34293907	MYCN	chr1	34293781	34293792
HMGA2	activation	chr1	34292963	34293907	BHLHE40	chr1	34293828	34293837
HMGA2	activation	chr1	34292963	34293907	ZIC2	chr1	34293867	34293880
HMGA2	activation	chr1	34295634	34295963	TCF12	chr1	34295650	34295660
HMGA2	activation	chr1	34295634	34295963	TCF12	chr1	34295651	34295661
HMGA2	activation	chr1	34295634	34295963	KLF5	chr1	34295676	34295685
HMGA2	activation	chr1	34295634	34295963	MYC	chr1	34295790	34295801
HMGA2	activation	chr1	34295634	34295963	ZNF821	chr1	34295882	34295896
HMGA2	activation	chr1	34295634	34295963	BACH1	chr1	34295945	34295957
HMGA2	activation	chr1	34300090	34300963	ZIC2	chr1	34300202	34300215
HMGA2	activation	chr1	34300090	34300963	IRF7	chr1	34300218	34300231
HMGA2	activation	chr1	34300090	34300963	SOX3	chr1	34300280	34300289
HMGA2	activation	chr1	34300090	34300963	SOX4	chr1	34300281	34300290
HMGA2	activation	chr1	34300090	34300963	TFAP2A	chr1	34300677	34300688
HMGA2	activation	chr1	34300090	34300963	TFAP2C	chr1	34300692	34300705
HMGA2	activation	chr1	34300090	34300963	TFAP2A	chr1	34300693	34300704
HMGA2	activation	chr1	34300090	34300963	HIC2	chr1	34300731	34300739
HMGA2	activation	chr1	34300090	34300963	TCF7L2	chr1	34300806	34300819
HMGA2	activation	chr1	34300090	34300963	TBX3	chr1	34300903	34300912
HMGA2	activation	chr1	34303271	34303468	HIC2	chr1	34303350	34303358
HMGA2	activation	chr1	34304067	34304433	BACH1	chr1	34304097	34304109
HMGA2	activation	chr1	34304067	34304433	TGIF1	chr1	34304105	34304116
HMGA2	activation	chr1	34304067	34304433	MEIS2	chr1	34304110	34304117
HMGA2	activation	chr1	34304067	34304433	ZIC2	chr1	34304119	34304132
HMGA2	activation	chr1	34304067	34304433	MEIS2	chr1	34304142	34304149
HMGA2	activation	chr1	34304067	34304433	KLF5	chr1	34304218	34304227
HMGA2	activation	chr1	34304840	34305622	MEIS1	chr1	34304840	34304846
HMGA2	activation	chr1	34304840	34305622	ZNF423	chr1	34305025	34305039
HMGA2	activation	chr1	34304840	34305622	TFAP2A	chr1	34305065	34305077
HMGA2	activation	chr1	34304840	34305622	TFAP2C	chr1	34305065	34305077
HMGA2	activation	chr1	34304840	34305622	ZIC2	chr1	34305106	34305119
HMGA2	activation	chr1	34304840	34305622	HIC2	chr1	34305173	34305181
HMGA2	activation	chr1	34304840	34305622	ZIC3	chr1	34305178	34305192
HMGA2	activation	chr1	34304840	34305622	ZIC2	chr1	34305180	34305193
HMGA2	activation	chr1	34304840	34305622	MEIS2	chr1	34305350	34305364
HMGA2	activation	chr1	34304840	34305622	MEIS1	chr1	34305351	34305363
HMGA2	activation	chr1	34304840	34305622	MYC	chr1	34305365	34305376
HMGA2	activation	chr1	34304840	34305622	ELF1	chr1	34305418	34305431
HMGA2	activation	chr1	34304840	34305622	ETV5	chr1	34305419	34305429
HMGA2	activation	chr1	34304840	34305622	FOXA2	chr1	34305526	34305536
HMGA2	activation	chr1	34304840	34305622	TCF12	chr1	34305599	34305609
HMGA2	activation	chr1	34304840	34305622	ZIC2	chr1	34305601	34305614
HMGA2	activation	chr1	34306372	34306576	SOX3	chr1	34306480	34306489
HMGA2	activation	chr1	34306372	34306576	SOX4	chr1	34306481	34306490
HMGA2	activation	chr1	34306372	34306576	HIC2	chr1	34306492	34306500
HMGA2	activation	chr1	34306372	34306576	MYC	chr1	34306494	34306505
HMGA2	activation	chr1	34306372	34306576	MYCN	chr1	34306494	34306505
HMGA2	activation	chr1	34306372	34306576	HEY1	chr1	34306495	34306504
HMGA2	activation	chr1	34306372	34306576	OTX2	chr1	34306560	34306571
HMGA2	activation	chr1	34306372	34306576	PITX2	chr1	34306562	34306569
HMGA2	activation	chr1	34315130	34315338	HIC2	chr1	34315229	34315237
HMGA2	activation	chr1	34316232	34316465	ZIC2	chr1	34316237	34316250
HMGA2	activation	chr1	34316232	34316465	TCF12	chr1	34316238	34316248
HMGA2	activation	chr1	34316232	34316465	TCF7L2	chr1	34316247	34316260
HMGA2	activation	chr1	34316232	34316465	GRHL1	chr1	34316263	34316274
HMGA2	activation	chr1	34316232	34316465	GRHL2	chr1	34316263	34316274
HMGA2	activation	chr1	34316232	34316465	GRHL3	chr1	34316263	34316274
HMGA2	activation	chr1	34316232	34316465	MYC	chr1	34316278	34316289
HMGA2	activation	chr1	34316232	34316465	MYCN	chr1	34316278	34316289
HMGA2	activation	chr1	34316232	34316465	HEY1	chr1	34316279	34316288
HMGA2	activation	chr1	34316232	34316465	HIF1A	chr1	34316280	34316289
HMGA2	activation	chr1	34316232	34316465	MEIS1	chr1	34316339	34316345
HMGA2	activation	chr1	34316232	34316465	DLX5	chr1	34316352	34316359
HMGA2	activation	chr1	34316232	34316465	MSX1	chr1	34316352	34316359
HMGA2	activation	chr1	34320402	34321091	ELF1	chr1	34320491	34320504
HMGA2	activation	chr1	34320402	34321091	TCF12	chr1	34320505	34320515
HMGA2	activation	chr1	34320402	34321091	TCF12	chr1	34320517	34320527
HMGA2	activation	chr1	34320402	34321091	ZIC2	chr1	34320518	34320531
HMGA2	activation	chr1	34320402	34321091	BACH1	chr1	34320522	34320534
HMGA2	activation	chr1	34320402	34321091	ZIC2	chr1	34320533	34320546
HMGA2	activation	chr1	34320402	34321091	TCF12	chr1	34320534	34320544
HMGA2	activation	chr1	34320402	34321091	ZIC2	chr1	34320586	34320599
HMGA2	activation	chr1	34320402	34321091	KLF6	chr1	34320602	34320612
HMGA2	activation	chr1	34320402	34321091	ZIC2	chr1	34320644	34320657
HMGA2	activation	chr1	34320402	34321091	SOX3	chr1	34320757	34320766
HMGA2	activation	chr1	34320402	34321091	BACH1	chr1	34320978	34320990
HMGA2	activation	chr1	34320402	34321091	TCF12	chr1	34321051	34321061
HMGA2	activation	chr1	34322157	34322348	ELF1	chr1	34322289	34322302
HMGA2	activation	chr1	34322157	34322348	ETS2	chr1	34322292	34322301
HMGA2	activation	chr1	34322157	34322348	ZIC3	chr1	34322301	34322315
HMGA2	activation	chr1	34325896	34326076	TFAP2A	chr1	34325949	34325962
HMGA2	activation	chr1	34325896	34326076	TFAP2C	chr1	34325949	34325962
HMGA2	activation	chr1	34325896	34326076	ZIC2	chr1	34325994	34326007
HMGA2	activation	chr1	34336733	34337498	SOX4	chr1	34336759	34336768
HMGA2	activation	chr1	34336733	34337498	SOX3	chr1	34336760	34336769
HMGA2	activation	chr1	34336733	34337498	EOMES	chr1	34336773	34336785
HMGA2	activation	chr1	34336733	34337498	SOX3	chr1	34336782	34336791
HMGA2	activation	chr1	34336733	34337498	GRHL2	chr1	34336914	34336925
HMGA2	activation	chr1	34336733	34337498	MEIS2	chr1	34337198	34337205
HMGA2	activation	chr1	34336733	34337498	TCF7L2	chr1	34337218	34337231
HMGA2	activation	chr1	34336733	34337498	LHX5	chr1	34337309	34337316
HMGA2	activation	chr1	34336733	34337498	NKX6-2	chr1	34337309	34337316
HMGA2	activation	chr1	34336733	34337498	SALL1	chr1	34337319	34337326
HMGA2	activation	chr1	34344461	34344844	BACH1	chr1	34344480	34344492
HMGA2	activation	chr1	34344461	34344844	HES1	chr1	34344490	34344499
HMGA2	activation	chr1	34344461	34344844	TBX3	chr1	34344658	34344667
HMGA2	activation	chr1	34345596	34345792	HIC2	chr1	34345652	34345660
HMGA2	activation	chr1	34345596	34345792	KLF5	chr1	34345676	34345685
HMGA2	activation	chr1	34348986	34349205	TFAP2A	chr1	34349088	34349099
HMGA2	activation	chr1	34348986	34349205	TFAP2C	chr1	34349088	34349099
HMGA2	activation	chr1	34348986	34349205	TFAP2A	chr1	34349119	34349130
HMGA2	activation	chr1	34348986	34349205	TFAP2C	chr1	34349119	34349130
HMGA2	activation	chr1	34348986	34349205	NFKB2	chr1	34349161	34349173
HMGA2	activation	chr1	34352726	34353842	TFAP2A	chr1	34352732	34352743
HMGA2	activation	chr1	34352726	34353842	TCF12	chr1	34352914	34352924
HMGA2	activation	chr1	34352726	34353842	ELF1	chr1	34352982	34352995
HMGA2	activation	chr1	34352726	34353842	ETV5	chr1	34352984	34352994
HMGA2	activation	chr1	34352726	34353842	BACH1	chr1	34353021	34353033
HMGA2	activation	chr1	34352726	34353842	TCF12	chr1	34353037	34353047
HMGA2	activation	chr1	34352726	34353842	MEIS2	chr1	34353042	34353049
HMGA2	activation	chr1	34352726	34353842	MEIS1	chr1	34353179	34353191
HMGA2	activation	chr1	34352726	34353842	ZIC2	chr1	34353203	34353216
HMGA2	activation	chr1	34352726	34353842	KLF6	chr1	34353236	34353246
HMGA2	activation	chr1	34352726	34353842	ZIC2	chr1	34353304	34353317
HMGA2	activation	chr1	34352726	34353842	ZIC2	chr1	34353694	34353707
HMGA2	activation	chr1	34352726	34353842	TCF12	chr1	34353708	34353718
HMGA2	activation	chr1	34354105	34354336	NANOG	chr1	34354120	34354130
HMGA2	activation	chr1	34354105	34354336	SOX13	chr1	34354120	34354130
HMGA2	activation	chr1	34354105	34354336	SOX2	chr1	34354120	34354130
HMGA2	activation	chr1	34354105	34354336	SOX4	chr1	34354120	34354129
HMGA2	activation	chr1	34354105	34354336	ELF1	chr1	34354136	34354149
HMGA2	activation	chr1	34354105	34354336	ETV5	chr1	34354137	34354147
HMGA2	activation	chr1	34354105	34354336	TFAP2A	chr1	34354140	34354153
HMGA2	activation	chr1	34354105	34354336	TFAP2C	chr1	34354140	34354153
HMGA2	activation	chr1	34354105	34354336	TFAP2A	chr1	34354244	34354257
HMGA2	activation	chr1	34354105	34354336	TFAP2C	chr1	34354244	34354257
HMGA2	activation	chr1	34355352	34355793	ELF1	chr1	34355374	34355387
HMGA2	activation	chr1	34355352	34355793	FOXA2	chr1	34355414	34355424
HMGA2	activation	chr1	34355352	34355793	TGIF1	chr1	34355445	34355456
HMGA2	activation	chr1	34355352	34355793	EOMES	chr1	34355553	34355565
HMGA2	activation	chr1	34355352	34355793	GLI2	chr1	34355639	34355653
HMGA2	activation	chr1	34355352	34355793	TCF12	chr1	34355665	34355675
HMGA2	activation	chr1	34355352	34355793	TCF12	chr1	34355666	34355676
HMGA2	activation	chr1	34355352	34355793	TCF12	chr1	34355692	34355702
HMGA2	activation	chr1	34355352	34355793	ZIC2	chr1	34355694	34355707
HMGA2	activation	chr1	34355352	34355793	OTX2	chr1	34355769	34355780
HMGA2	activation	chr1	34355352	34355793	PITX2	chr1	34355771	34355778
HMGA2	activation	chr1	34359188	34359378	IRF7	chr1	34359207	34359220
YEATS4	repression_index_5	chr1	35433214	35433414	TCF12	chr1	35433239	35433249
YEATS4	repression_index_5	chr1	35433214	35433414	TCF12	chr1	35433240	35433250
YEATS4	repression_index_5	chr1	35433214	35433414	HIC2	chr1	35433298	35433306
YEATS4	repression_index_5	chr1	35433214	35433414	TFAP2A	chr1	35433389	35433402
YEATS4	activation	chr1	35435628	35436843	SIX1	chr1	35435712	35435722
YEATS4	activation	chr1	35435628	35436843	SOX4	chr1	35435855	35435864
YEATS4	activation	chr1	35435628	35436843	ZIC2	chr1	35435890	35435903
YEATS4	activation	chr1	35435628	35436843	TCF7L1	chr1	35436043	35436054
YEATS4	activation	chr1	35435628	35436843	GRHL2	chr1	35436080	35436091
YEATS4	activation	chr1	35435628	35436843	IRF7	chr1	35436223	35436236
YEATS4	activation	chr1	35435628	35436843	KLF5	chr1	35436338	35436347
YEATS4	activation	chr1	35435628	35436843	KLF6	chr1	35436338	35436348
YEATS4	activation	chr1	35435628	35436843	SIX3	chr1	35436446	35436462
YEATS4	activation	chr1	35435628	35436843	TFAP2A	chr1	35436459	35436472
YEATS4	activation	chr1	35435628	35436843	TFAP2A	chr1	35436583	35436596
YEATS4	activation	chr1	35435628	35436843	MYC	chr1	35436595	35436606
YEATS4	activation	chr1	35435628	35436843	MYCN	chr1	35436595	35436606
YEATS4	activation	chr1	35435628	35436843	HES1	chr1	35436596	35436605
YEATS4	activation	chr1	35435628	35436843	HEY1	chr1	35436596	35436605
YEATS4	activation	chr1	35435628	35436843	MEIS1	chr1	35436633	35436639
YEATS4	activation	chr1	35435628	35436843	TFAP2A	chr1	35436697	35436710
YEATS4	activation	chr1	35435628	35436843	TFAP2C	chr1	35436697	35436710
YEATS4	activation	chr1	35435628	35436843	TFAP2A	chr1	35436698	35436711
YEATS4	activation	chr1	35435628	35436843	TFAP2C	chr1	35436698	35436711
YEATS4	activation	chr1	35435628	35436843	ELF1	chr1	35436768	35436781
YEATS4	activation	chr1	35438707	35438899	TCF7L2	chr1	35438742	35438755
YEATS4	activation	chr1	35438707	35438899	TCF7L1	chr1	35438744	35438755
YEATS4	activation	chr1	35438707	35438899	TFAP2A	chr1	35438819	35438832
YEATS4	activation	chr1	35438707	35438899	TFAP2A	chr1	35438846	35438859
YEATS4	activation	chr1	35438707	35438899	TFAP2C	chr1	35438846	35438859
YEATS4	activation	chr1	35445278	35445509	FOXA2	chr1	35445364	35445374
YEATS4	activation	chr1	35445278	35445509	SOX4	chr1	35445444	35445453
YEATS4	activation	chr1	35448719	35450329	ZIC2	chr1	35448818	35448831
YEATS4	activation	chr1	35448719	35450329	TCF12	chr1	35448829	35448839
YEATS4	activation	chr1	35448719	35450329	TCF12	chr1	35448830	35448840
YEATS4	activation	chr1	35448719	35450329	KLF5	chr1	35448870	35448879
YEATS4	activation	chr1	35448719	35450329	TFAP2A	chr1	35448875	35448887
YEATS4	activation	chr1	35448719	35450329	TFAP2C	chr1	35448875	35448887
YEATS4	activation	chr1	35448719	35450329	TFAP2A	chr1	35448922	35448934
YEATS4	activation	chr1	35448719	35450329	TFAP2C	chr1	35448922	35448934
YEATS4	activation	chr1	35448719	35450329	ZIC2	chr1	35449099	35449112
YEATS4	activation	chr1	35448719	35450329	ZIC2	chr1	35449204	35449217
YEATS4	activation	chr1	35448719	35450329	ZIC3	chr1	35449205	35449219
YEATS4	activation	chr1	35448719	35450329	HES1	chr1	35449290	35449299
YEATS4	activation	chr1	35448719	35450329	KLF5	chr1	35449348	35449357
YEATS4	activation	chr1	35448719	35450329	TFAP2C	chr1	35449350	35449363
YEATS4	activation	chr1	35448719	35450329	ETV5	chr1	35449455	35449465
YEATS4	activation	chr1	35448719	35450329	ETS2	chr1	35449477	35449486
YEATS4	activation	chr1	35448719	35450329	ETV5	chr1	35449478	35449488
YEATS4	activation	chr1	35448719	35450329	TFAP2C	chr1	35449672	35449684
YEATS4	activation	chr1	35448719	35450329	TFAP2A	chr1	35449684	35449696
YEATS4	activation	chr1	35448719	35450329	KLF5	chr1	35449698	35449707
YEATS4	activation	chr1	35448719	35450329	TCF12	chr1	35449702	35449712
YEATS4	activation	chr1	35448719	35450329	TFAP2A	chr1	35449708	35449719
YEATS4	activation	chr1	35448719	35450329	TFAP2C	chr1	35449708	35449719
YEATS4	activation	chr1	35448719	35450329	TFAP2C	chr1	35449708	35449721
YEATS4	activation	chr1	35448719	35450329	TFAP2A	chr1	35449787	35449798
YEATS4	activation	chr1	35448719	35450329	TFAP2C	chr1	35449787	35449800
YEATS4	activation	chr1	35448719	35450329	KLF5	chr1	35449809	35449818
YEATS4	activation	chr1	35448719	35450329	KLF5	chr1	35449813	35449822
YEATS4	activation	chr1	35448719	35450329	SOX3	chr1	35449851	35449860
YEATS4	activation	chr1	35448719	35450329	SOX4	chr1	35449852	35449861
YEATS4	activation	chr1	35448719	35450329	TFAP2A	chr1	35449877	35449888
YEATS4	activation	chr1	35448719	35450329	TFAP2A	chr1	35449893	35449906
YEATS4	activation	chr1	35448719	35450329	TFAP2C	chr1	35449893	35449906
YEATS4	activation	chr1	35448719	35450329	TCF12	chr1	35449965	35449975
YEATS4	activation	chr1	35448719	35450329	TGIF1	chr1	35449965	35449976
YEATS4	activation	chr1	35448719	35450329	MEIS2	chr1	35449970	35449977
YEATS4	activation	chr1	35448719	35450329	MEIS1	chr1	35449971	35449977
YEATS4	activation	chr1	35448719	35450329	ELF1	chr1	35450070	35450083
YEATS4	activation	chr1	35448719	35450329	ELF1	chr1	35450191	35450204
YEATS4	activation	chr1	35448719	35450329	TCF7L2	chr1	35450218	35450231
YEATS4	activation	chr1	35448719	35450329	SOX3	chr1	35450227	35450236
YEATS4	activation	chr1	35448719	35450329	SOX4	chr1	35450228	35450237
YEATS4	activation	chr1	35456419	35456761	MYC	chr1	35456486	35456497
YEATS4	activation	chr1	35456419	35456761	MYCN	chr1	35456486	35456497
YEATS4	activation	chr1	35456419	35456761	HEY1	chr1	35456487	35456496
YEATS4	activation	chr1	35456419	35456761	ZIC2	chr1	35456540	35456553
YEATS4	activation	chr1	35456419	35456761	OTX2	chr1	35456581	35456592
YEATS4	activation	chr1	35456419	35456761	PITX2	chr1	35456583	35456590
YEATS4	activation	chr1	35456419	35456761	GATA2	chr1	35456620	35456630
YEATS4	activation	chr1	35458897	35459367	SALL1	chr1	35458968	35458978
YEATS4	activation	chr1	35458897	35459367	CDX2	chr1	35458970	35458981
YEATS4	activation	chr1	35458897	35459367	SOX4	chr1	35458992	35459001
YEATS4	activation	chr1	35458897	35459367	ZIC2	chr1	35459029	35459042
YEATS4	activation	chr1	35458897	35459367	ZIC3	chr1	35459030	35459044
YEATS4	activation	chr1	35458897	35459367	TCF12	chr1	35459033	35459043
YEATS4	activation	chr1	35458897	35459367	ZIC3	chr1	35459033	35459047
YEATS4	activation	chr1	35458897	35459367	EOMES	chr1	35459335	35459347
YEATS4	activation	chr1	35460338	35460693	TFAP2C	chr1	35460459	35460470
YEATS4	activation	chr1	35460338	35460693	MEIS1	chr1	35460500	35460506
YEATS4	activation	chr1	35460338	35460693	MEIS2	chr1	35460500	35460507
YEATS4	activation	chr1	35460338	35460693	BACH1	chr1	35460634	35460646
YEATS4	activation	chr1	35462577	35462864	ZIC2	chr1	35462685	35462698
YEATS4	activation	chr1	35462577	35462864	TFAP2A	chr1	35462746	35462759
YEATS4	activation	chr1	35462577	35462864	TFAP2C	chr1	35462746	35462759
YEATS4	activation	chr1	35472993	35473549	HIC2	chr1	35472995	35473003
YEATS4	activation	chr1	35472993	35473549	ZIC2	chr1	35473152	35473165
YEATS4	activation	chr1	35472993	35473549	MYC	chr1	35473299	35473310
YEATS4	activation	chr1	35472993	35473549	ZIC2	chr1	35473412	35473425
YEATS4	activation	chr1	35472993	35473549	TCF12	chr1	35473458	35473468
YEATS4	activation	chr1	35472993	35473549	ZIC2	chr1	35473459	35473472
YEATS4	activation	chr1	35472993	35473549	ZIC2	chr1	35473472	35473485
YEATS4	activation	chr1	35475483	35475697	ZIC2	chr1	35475608	35475621
YEATS4	activation	chr1	35475483	35475697	OTX2	chr1	35475664	35475675
YEATS4	activation	chr1	35480457	35480641	ZIC2	chr1	35480480	35480493
YEATS4	activation	chr1	35480457	35480641	TFAP2A	chr1	35480520	35480532
YEATS4	activation	chr1	35480457	35480641	MYCN	chr1	35480612	35480623
YEATS4	repression_index_5	chr1	35534780	35534962	ZIC2	chr1	35534834	35534847
YEATS4	repression_index_5	chr1	35534780	35534962	ELF1	chr1	35534897	35534910
YEATS4	repression_index_5	chr1	35534780	35534962	SIX3	chr1	35534923	35534939
YEATS4	activation	chr1	35540817	35541014	TFAP2A	chr1	35540885	35540898
YEATS4	activation	chr1	35543932	35544385	MYC	chr1	35544037	35544048
YEATS4	activation	chr1	35543932	35544385	TCF12	chr1	35544143	35544153
YEATS4	activation	chr1	35555572	35556056	TCF7L2	chr1	35555598	35555611
YEATS4	activation	chr1	35555572	35556056	TCF7L1	chr1	35555600	35555611
YEATS4	activation	chr1	35555572	35556056	TFAP2A	chr1	35555641	35555654
YEATS4	activation	chr1	35555572	35556056	ELF1	chr1	35555645	35555658
YEATS4	activation	chr1	35555572	35556056	HIC2	chr1	35555837	35555845
YEATS4	activation	chr1	35555572	35556056	TBX3	chr1	35555889	35555898
YEATS4	activation	chr1	35555572	35556056	TCF12	chr1	35556013	35556023
YEATS4	activation	chr1	35568773	35569569	ZIC2	chr1	35568876	35568889
YEATS4	activation	chr1	35568773	35569569	NANOG	chr1	35568890	35568900
YEATS4	activation	chr1	35568773	35569569	SOX13	chr1	35568890	35568900
YEATS4	activation	chr1	35568773	35569569	SOX2	chr1	35568890	35568900
YEATS4	activation	chr1	35568773	35569569	ZIC2	chr1	35568904	35568917
YEATS4	activation	chr1	35568773	35569569	FOXA2	chr1	35569006	35569016
YEATS4	activation	chr1	35568773	35569569	HIC2	chr1	35569284	35569292
YEATS4	activation	chr1	35568773	35569569	HIC2	chr1	35569465	35569473
CSRP2	activation	chr1	38236235	38236603	BACH1	chr1	38236282	38236294
CSRP2	activation	chr1	38236235	38236603	ELF1	chr1	38236464	38236477
CSRP2	activation	chr1	38236235	38236603	SOX3	chr1	38236592	38236601
CSRP2	activation	chr1	38237796	38238318	HIC2	chr1	38237851	38237859
CSRP2	activation	chr1	38237796	38238318	GBX2	chr1	38238076	38238085
CSRP2	activation	chr1	38237796	38238318	HOXA1	chr1	38238077	38238084
CSRP2	activation	chr1	38237796	38238318	HOXB1	chr1	38238077	38238084
CSRP2	activation	chr1	38237796	38238318	LHX5	chr1	38238077	38238084
CSRP2	activation	chr1	38237796	38238318	BACH1	chr1	38238112	38238124
CSRP2	activation	chr1	38237796	38238318	NANOG	chr1	38238133	38238143
CSRP2	activation	chr1	38237796	38238318	SOX13	chr1	38238133	38238143
CSRP2	activation	chr1	38237796	38238318	SOX2	chr1	38238133	38238143
CSRP2	activation	chr1	38237796	38238318	CDX2	chr1	38238225	38238236
CSRP2	activation	chr1	38237796	38238318	TCF7L1	chr1	38238305	38238316
CSRP2	activation	chr1	38240916	38241191	TGIF1	chr1	38240998	38241009
CSRP2	activation	chr1	38240916	38241191	TCF12	chr1	38241116	38241126
CSRP2	activation	chr1	38240916	38241191	TGIF1	chr1	38241116	38241127
CSRP2	activation	chr1	38240916	38241191	TCF12	chr1	38241117	38241127
CSRP2	activation	chr1	38240916	38241191	MEIS2	chr1	38241121	38241128
CSRP2	activation	chr1	38240916	38241191	MEIS2	chr1	38241152	38241166
CSRP2	activation	chr1	38240916	38241191	MEIS1	chr1	38241153	38241165
CSRP2	activation	chr1	38241665	38241849	HIC2	chr1	38241679	38241687
CSRP2	activation	chr1	38241665	38241849	SIX1	chr1	38241779	38241789
CSRP2	activation	chr1	38241665	38241849	SOX3	chr1	38241820	38241829
CSRP2	activation	chr1	38242435	38242714	ZIC2	chr1	38242478	38242491
CSRP2	activation	chr1	38242435	38242714	RREB1	chr1	38242500	38242519
CSRP2	activation	chr1	38242435	38242714	MYC	chr1	38242508	38242519
CSRP2	activation	chr1	38242435	38242714	TCF12	chr1	38242521	38242531
CSRP2	activation	chr1	38242435	38242714	MEIS2	chr1	38242526	38242533
CSRP2	activation	chr1	38242435	38242714	GRHL2	chr1	38242564	38242575
CSRP2	activation	chr1	38242435	38242714	ZIC2	chr1	38242642	38242655
CSRP2	activation	chr1	38249368	38249650	HIC2	chr1	38249470	38249478
CSRP2	activation	chr1	38249368	38249650	MEIS2	chr1	38249613	38249627
CSRP2	activation	chr1	38254407	38254910	ELF1	chr1	38254455	38254468
CSRP2	activation	chr1	38254407	38254910	TFAP2A	chr1	38254557	38254568
CSRP2	activation	chr1	38254407	38254910	TFAP2C	chr1	38254557	38254568
CSRP2	activation	chr1	38254407	38254910	KLF5	chr1	38254595	38254604
CSRP2	activation	chr1	38254407	38254910	TCF12	chr1	38254654	38254664
CSRP2	activation	chr1	38254407	38254910	TCF12	chr1	38254655	38254665
CSRP2	activation	chr1	38254407	38254910	TFAP2A	chr1	38254661	38254673
CSRP2	activation	chr1	38254407	38254910	TFAP2A	chr1	38254661	38254672
CSRP2	activation	chr1	38254407	38254910	TFAP2A	chr1	38254661	38254674
CSRP2	activation	chr1	38254407	38254910	TFAP2C	chr1	38254661	38254673
CSRP2	activation	chr1	38254407	38254910	TFAP2C	chr1	38254661	38254672
CSRP2	activation	chr1	38254407	38254910	TFAP2C	chr1	38254661	38254674
CSRP2	activation	chr1	38254407	38254910	TFAP2A	chr1	38254662	38254673
CSRP2	activation	chr1	38254407	38254910	TFAP2C	chr1	38254662	38254673
CSRP2	activation	chr1	38254407	38254910	DLX5	chr1	38254694	38254701
CSRP2	activation	chr1	38254407	38254910	MSX1	chr1	38254694	38254701
CSRP2	activation	chr1	38254407	38254910	TFAP2A	chr1	38254785	38254798
CSRP2	activation	chr1	38254407	38254910	TFAP2C	chr1	38254785	38254798
CSRP2	activation	chr1	38254407	38254910	ZIC2	chr1	38254800	38254813
CSRP2	activation	chr1	38254407	38254910	MYC	chr1	38254804	38254815
CSRP2	activation	chr1	38254407	38254910	TCF12	chr1	38254804	38254814
CSRP2	activation	chr1	38254407	38254910	TCF12	chr1	38254805	38254815
CSRP2	activation	chr1	38255174	38255455	ZIC2	chr1	38255323	38255336
CSRP2	activation	chr1	38255174	38255455	ZIC2	chr1	38255401	38255414
CSRP2	activation	chr1	38255174	38255455	ZIC3	chr1	38255402	38255416
CSRP2	activation	chr1	38255684	38256132	MEIS2	chr1	38255736	38255743
CSRP2	activation	chr1	38255684	38256132	MGA	chr1	38255956	38255963
CSRP2	activation	chr1	38255684	38256132	TCF12	chr1	38256024	38256034
CSRP2	activation	chr1	38255684	38256132	MYC	chr1	38256046	38256057
CSRP2	activation	chr1	38259656	38260163	TCF12	chr1	38259810	38259820
CSRP2	activation	chr1	38259656	38260163	TCF12	chr1	38259811	38259821
CSRP2	activation	chr1	38259656	38260163	ETV5	chr1	38259854	38259864
CSRP2	activation	chr1	38259656	38260163	ELF1	chr1	38259881	38259894
CSRP2	activation	chr1	38259656	38260163	ZIC2	chr1	38259885	38259898
CSRP2	activation	chr1	38259656	38260163	PITX2	chr1	38259931	38259938
CSRP2	activation	chr1	38259656	38260163	GATA2	chr1	38259962	38259972
CSRP2	activation	chr1	38259656	38260163	TFAP2A	chr1	38260023	38260034
CSRP2	activation	chr1	38264761	38264936	ZIC3	chr1	38264784	38264798
CSRP2	activation	chr1	38264761	38264936	KLF5	chr1	38264793	38264802
CSRP2	activation	chr1	38264761	38264936	IRF7	chr1	38264819	38264832
CSRP2	activation	chr1	38264761	38264936	EOMES	chr1	38264836	38264848
CSRP2	activation	chr1	38264761	38264936	KLF5	chr1	38264836	38264845
CSRP2	activation	chr1	38264761	38264936	KLF6	chr1	38264836	38264846
CSRP2	activation	chr1	38264761	38264936	TBX3	chr1	38264836	38264845
CSRP2	activation	chr1	38264761	38264936	MGA	chr1	38264837	38264844
CSRP2	activation	chr1	38264761	38264936	MEIS2	chr1	38264841	38264848
CSRP2	activation	chr1	38264761	38264936	TCF12	chr1	38264845	38264855
CSRP2	activation	chr1	38264761	38264936	TCF12	chr1	38264846	38264856
CSRP2	activation	chr1	38264761	38264936	BACH1	chr1	38264848	38264860
CSRP2	activation	chr1	38270087	38270520	KLF5	chr1	38270189	38270198
CSRP2	activation	chr1	38270087	38270520	ZNF821	chr1	38270220	38270234
CSRP2	activation	chr1	38270087	38270520	FOXA2	chr1	38270278	38270288
CSRP2	activation	chr1	38270087	38270520	GRHL2	chr1	38270287	38270298
CSRP2	activation	chr1	38270087	38270520	GATA2	chr1	38270297	38270307
CSRP2	activation	chr1	38270087	38270520	ELF1	chr1	38270375	38270388
CSRP2	activation	chr1	38270087	38270520	ZIC2	chr1	38270482	38270495
CSRP2	activation	chr1	38279796	38280063	EOMES	chr1	38279819	38279831
CSRP2	activation	chr1	38279796	38280063	MGA	chr1	38279823	38279830
CSRP2	activation	chr1	38279796	38280063	ZIC2	chr1	38279929	38279942
CSRP2	activation	chr1	38279796	38280063	GRHL2	chr1	38279932	38279943
CSRP2	activation	chr1	38286628	38286885	KLF5	chr1	38286747	38286756
CSRP2	activation	chr1	38288252	38289195	KLF5	chr1	38288377	38288386
CSRP2	activation	chr1	38288252	38289195	TCF12	chr1	38288512	38288522
CSRP2	activation	chr1	38288252	38289195	HIC2	chr1	38288639	38288647
CSRP2	activation	chr1	38288252	38289195	ZIC2	chr1	38288651	38288664
CSRP2	activation	chr1	38288252	38289195	ZIC2	chr1	38288671	38288684
CSRP2	activation	chr1	38288252	38289195	TCF12	chr1	38288695	38288705
CSRP2	activation	chr1	38288252	38289195	TFAP2A	chr1	38288795	38288806
CSRP2	activation	chr1	38288252	38289195	TFAP2C	chr1	38288795	38288806
CSRP2	activation	chr1	38288252	38289195	SALL1	chr1	38288853	38288863
CSRP2	activation	chr1	38288252	38289195	CDX2	chr1	38288855	38288866
CSRP2	activation	chr1	38288252	38289195	TCF12	chr1	38288923	38288933
CSRP2	activation	chr1	38288252	38289195	TCF12	chr1	38288924	38288934
CSRP2	activation	chr1	38288252	38289195	TFAP2A	chr1	38288932	38288943
CSRP2	activation	chr1	38288252	38289195	TFAP2A	chr1	38288932	38288945
CSRP2	activation	chr1	38288252	38289195	TFAP2C	chr1	38288932	38288943
CSRP2	activation	chr1	38288252	38289195	TFAP2C	chr1	38288932	38288945
CSRP2	activation	chr1	38288252	38289195	TCF7L1	chr1	38288960	38288971
CSRP2	activation	chr1	38288252	38289195	TCF7L2	chr1	38288960	38288973
CSRP2	activation	chr1	38288252	38289195	TBX3	chr1	38288990	38288999
CSRP2	activation	chr1	38288252	38289195	MGA	chr1	38288991	38288998
ATF7IP	activation	chr1	48825412	48825820	IRF7	chr1	48825451	48825464
ATF7IP	activation	chr1	48831683	48832317	KLF5	chr1	48831872	48831881
ATF7IP	activation	chr1	48831683	48832317	ZIC2	chr1	48831932	48831945
ATF7IP	activation	chr1	48831683	48832317	TCF12	chr1	48832039	48832049
ATF7IP	activation	chr1	48831683	48832317	TFAP2A	chr1	48832053	48832066
ATF7IP	activation	chr1	48831683	48832317	TFAP2C	chr1	48832053	48832066
ATF7IP	activation	chr1	48831683	48832317	CDX2	chr1	48832100	48832111
ATF7IP	activation	chr1	48831683	48832317	KLF5	chr1	48832200	48832209
ATF7IP	activation	chr1	48831683	48832317	TCF12	chr1	48832216	48832226
ATF7IP	activation	chr1	48831683	48832317	TCF12	chr1	48832217	48832227
ATF7IP	activation	chr1	48831683	48832317	TCF12	chr1	48832242	48832252
ATF7IP	activation	chr1	48831683	48832317	RREB1	chr1	48832244	48832263
ATF7IP	activation	chr1	48833736	48834423	RREB1	chr1	48833793	48833812
ATF7IP	activation	chr1	48833736	48834423	KLF5	chr1	48833796	48833805
ATF7IP	activation	chr1	48833736	48834423	KLF6	chr1	48833796	48833806
ATF7IP	activation	chr1	48833736	48834423	TBX3	chr1	48833796	48833805
ATF7IP	activation	chr1	48833736	48834423	KLF5	chr1	48833804	48833813
ATF7IP	activation	chr1	48833736	48834423	SOX4	chr1	48834220	48834229
ATF7IP	activation	chr1	48833736	48834423	ETS2	chr1	48834349	48834358
ATF7IP	activation	chr1	48874831	48875372	TCF12	chr1	48874976	48874986
ATF7IP	activation	chr1	48874831	48875372	SOX4	chr1	48874994	48875003
ATF7IP	activation	chr1	48874831	48875372	SOX3	chr1	48874995	48875004
ATF7IP	activation	chr1	48874831	48875372	KLF5	chr1	48875272	48875281
ATF7IP	activation	chr1	48877359	48877576	ZIC2	chr1	48877435	48877448
ATF7IP	activation	chr1	48877359	48877576	BACH1	chr1	48877439	48877451
ATF7IP	activation	chr1	48877359	48877576	MYCN	chr1	48877491	48877502
ATF7IP	activation	chr1	48877359	48877576	TFAP2C	chr1	48877498	48877511
ATF7IP	activation	chr1	48928516	48929060	ZIC2	chr1	48928566	48928579
ATF7IP	activation	chr1	48928516	48929060	TCF12	chr1	48928605	48928615
ATF7IP	activation	chr1	48928516	48929060	TCF12	chr1	48928658	48928668
ATF7IP	activation	chr1	48928516	48929060	ZIC2	chr1	48928819	48928832
ATF7IP	activation	chr1	48928516	48929060	MYC	chr1	48928925	48928936
ATF7IP	activation	chr1	48928516	48929060	ETV5	chr1	48928983	48928993
ATF7IP	activation	chr1	48928516	48929060	TCF12	chr1	48928998	48929008
ATF7IP	activation	chr1	48928516	48929060	SIX3	chr1	48929039	48929055
ATF7IP	activation	chr1	48929427	48932064	HOXB1	chr1	48929451	48929458
ATF7IP	activation	chr1	48929427	48932064	LHX5	chr1	48929451	48929458
ATF7IP	activation	chr1	48929427	48932064	MEIS1	chr1	48929501	48929507
ATF7IP	activation	chr1	48929427	48932064	GATA2	chr1	48929519	48929529
ATF7IP	activation	chr1	48929427	48932064	MYC	chr1	48929592	48929603
ATF7IP	activation	chr1	48929427	48932064	MYCN	chr1	48929592	48929603
ATF7IP	activation	chr1	48929427	48932064	HES1	chr1	48929593	48929602
ATF7IP	activation	chr1	48929427	48932064	HEY1	chr1	48929593	48929602
ATF7IP	activation	chr1	48929427	48932064	BACH1	chr1	48929597	48929609
ATF7IP	activation	chr1	48929427	48932064	TCF12	chr1	48929684	48929694
ATF7IP	activation	chr1	48929427	48932064	SOX4	chr1	48929707	48929716
ATF7IP	activation	chr1	48929427	48932064	TCF12	chr1	48929722	48929732
ATF7IP	activation	chr1	48929427	48932064	TCF12	chr1	48929723	48929733
ATF7IP	activation	chr1	48929427	48932064	ZIC2	chr1	48929724	48929737
ATF7IP	activation	chr1	48929427	48932064	GLI2	chr1	48929756	48929770
ATF7IP	activation	chr1	48929427	48932064	ZIC2	chr1	48929785	48929798
ATF7IP	activation	chr1	48929427	48932064	ZIC2	chr1	48929800	48929813
ATF7IP	activation	chr1	48929427	48932064	FOXA2	chr1	48929833	48929843
ATF7IP	activation	chr1	48929427	48932064	CDX2	chr1	48929851	48929862
ATF7IP	activation	chr1	48929427	48932064	TFAP2A	chr1	48929974	48929986
ATF7IP	activation	chr1	48929427	48932064	SIX1	chr1	48930080	48930090
ATF7IP	activation	chr1	48929427	48932064	CDX2	chr1	48930092	48930103
ATF7IP	activation	chr1	48929427	48932064	MYCN	chr1	48930370	48930381
ATF7IP	activation	chr1	48929427	48932064	TFAP2A	chr1	48930370	48930382
ATF7IP	activation	chr1	48929427	48932064	KLF5	chr1	48930486	48930495
ATF7IP	activation	chr1	48929427	48932064	MEIS2	chr1	48930546	48930553
ATF7IP	activation	chr1	48929427	48932064	MEIS1	chr1	48930547	48930553
ATF7IP	activation	chr1	48929427	48932064	TCF12	chr1	48930554	48930564
ATF7IP	activation	chr1	48929427	48932064	TCF12	chr1	48930555	48930565
ATF7IP	activation	chr1	48929427	48932064	SIX1	chr1	48930593	48930603
ATF7IP	activation	chr1	48929427	48932064	ZIC2	chr1	48930628	48930641
ATF7IP	activation	chr1	48929427	48932064	ZIC2	chr1	48930641	48930654
ATF7IP	activation	chr1	48929427	48932064	TFAP2A	chr1	48930707	48930718
ATF7IP	activation	chr1	48929427	48932064	TFAP2A	chr1	48930707	48930719
ATF7IP	activation	chr1	48929427	48932064	TFAP2C	chr1	48930707	48930719
ATF7IP	activation	chr1	48929427	48932064	TFAP2C	chr1	48930707	48930718
ATF7IP	activation	chr1	48929427	48932064	TCF12	chr1	48930802	48930812
ATF7IP	activation	chr1	48929427	48932064	MEIS2	chr1	48930987	48931001
ATF7IP	activation	chr1	48929427	48932064	MEIS1	chr1	48930988	48931000
ATF7IP	activation	chr1	48929427	48932064	ZIC2	chr1	48931174	48931187
ATF7IP	activation	chr1	48929427	48932064	GRHL2	chr1	48931211	48931222
ATF7IP	activation	chr1	48929427	48932064	HIC2	chr1	48931367	48931375
ATF7IP	activation	chr1	48929427	48932064	ZIC2	chr1	48931389	48931402
ATF7IP	activation	chr1	48929427	48932064	TCF12	chr1	48931393	48931403
ATF7IP	activation	chr1	48929427	48932064	EOMES	chr1	48931396	48931408
ATF7IP	activation	chr1	48929427	48932064	TBX3	chr1	48931396	48931405
ATF7IP	activation	chr1	48929427	48932064	MGA	chr1	48931397	48931404
ATF7IP	activation	chr1	48929427	48932064	SOX4	chr1	48931410	48931419
ATF7IP	activation	chr1	48929427	48932064	FOXA2	chr1	48931424	48931434
ATF7IP	activation	chr1	48929427	48932064	TFAP2A	chr1	48931478	48931489
ATF7IP	activation	chr1	48929427	48932064	TFAP2C	chr1	48931478	48931489
ATF7IP	activation	chr1	48929427	48932064	TCF7L2	chr1	48931675	48931688
ATF7IP	activation	chr1	48929427	48932064	SOX3	chr1	48931815	48931824
ATF7IP	activation	chr1	48929427	48932064	KLF5	chr1	48931867	48931876
ATF7IP	activation	chr1	48929427	48932064	KLF6	chr1	48932049	48932059
ATF7IP	activation	chr1	48929427	48932064	KLF5	chr1	48932050	48932059
ATF7IP	activation	chr1	48932784	48933596	TFAP2A	chr1	48932850	48932863
ATF7IP	activation	chr1	48932784	48933596	TFAP2C	chr1	48932850	48932863
ATF7IP	activation	chr1	48932784	48933596	TCF12	chr1	48932873	48932883
ATF7IP	activation	chr1	48932784	48933596	TFAP2A	chr1	48932896	48932909
ATF7IP	activation	chr1	48932784	48933596	TFAP2C	chr1	48932896	48932909
ATF7IP	activation	chr1	48932784	48933596	ZIC3	chr1	48932927	48932941
ATF7IP	activation	chr1	48932784	48933596	ZIC2	chr1	48932929	48932942
ATF7IP	activation	chr1	48932784	48933596	ELF1	chr1	48932972	48932985
ATF7IP	activation	chr1	48934246	48934458	ZIC3	chr1	48934276	48934290
ATF7IP	activation	chr1	48934246	48934458	GRHL2	chr1	48934298	48934309
ATF7IP	activation	chr1	48934246	48934458	TFAP2A	chr1	48934364	48934375
ATF7IP	activation	chr1	48934246	48934458	TFAP2C	chr1	48934364	48934375
ATF7IP	activation	chr1	48935743	48936212	GATA2	chr1	48935768	48935778
ATF7IP	activation	chr1	48935743	48936212	MYC	chr1	48935790	48935801
ATF7IP	activation	chr1	48935743	48936212	BHLHE40	chr1	48935791	48935800
ATF7IP	activation	chr1	48935743	48936212	HES1	chr1	48935791	48935800
ATF7IP	activation	chr1	48935743	48936212	HEY1	chr1	48935791	48935800
ATF7IP	activation	chr1	48935743	48936212	FOXA2	chr1	48935826	48935836
ATF7IP	activation	chr1	48935743	48936212	SALL1	chr1	48935839	48935846
ATF7IP	activation	chr1	48935743	48936212	EOMES	chr1	48936004	48936016
ATF7IP	activation	chr1	48936833	48938386	TCF12	chr1	48936845	48936855
ATF7IP	activation	chr1	48936833	48938386	TCF12	chr1	48936846	48936856
ATF7IP	activation	chr1	48936833	48938386	HIC2	chr1	48937005	48937013
ATF7IP	activation	chr1	48936833	48938386	TCF12	chr1	48937085	48937095
ATF7IP	activation	chr1	48936833	48938386	TCF12	chr1	48937086	48937096
ATF7IP	activation	chr1	48936833	48938386	CDX2	chr1	48937147	48937158
ATF7IP	activation	chr1	48936833	48938386	SOX3	chr1	48937353	48937362
ATF7IP	activation	chr1	48936833	48938386	MEIS2	chr1	48937417	48937424
ATF7IP	activation	chr1	48936833	48938386	TCF12	chr1	48937838	48937848
ATF7IP	activation	chr1	48936833	48938386	TCF12	chr1	48937839	48937849
ATF7IP	activation	chr1	48936833	48938386	ZIC2	chr1	48937872	48937885
ATF7IP	activation	chr1	48936833	48938386	BACH1	chr1	48937945	48937957
ATF7IP	activation	chr1	48936833	48938386	TCF12	chr1	48938082	48938092
ATF7IP	activation	chr1	48936833	48938386	PITX2	chr1	48938113	48938120
ATF7IP	activation	chr1	48936833	48938386	SALL1	chr1	48938128	48938135
ATF7IP	activation	chr1	48936833	48938386	MYC	chr1	48938130	48938141
ATF7IP	activation	chr1	48936833	48938386	BHLHE40	chr1	48938131	48938140
ATF7IP	activation	chr1	48936833	48938386	MYC	chr1	48938305	48938316
ATF7IP	activation	chr1	48938743	48939300	NANOG	chr1	48938803	48938813
ATF7IP	activation	chr1	48938743	48939300	SOX13	chr1	48938803	48938813
ATF7IP	activation	chr1	48938743	48939300	SOX2	chr1	48938803	48938813
ATF7IP	activation	chr1	48938743	48939300	ELF1	chr1	48938915	48938928
ATF7IP	activation	chr1	48938743	48939300	TFAP2A	chr1	48938931	48938944
ATF7IP	activation	chr1	48938743	48939300	HOXA1	chr1	48939066	48939073
ATF7IP	activation	chr1	48938743	48939300	HOXB1	chr1	48939066	48939073
ATF7IP	activation	chr1	48938743	48939300	LHX5	chr1	48939066	48939073
ATF7IP	activation	chr1	48938743	48939300	BACH1	chr1	48939191	48939203
ATF7IP	activation	chr1	48966007	48967351	TCF12	chr1	48966239	48966249
ATF7IP	activation	chr1	48966007	48967351	TFAP2C	chr1	48966267	48966280
ATF7IP	activation	chr1	48966007	48967351	TFAP2A	chr1	48966269	48966280
ATF7IP	activation	chr1	48966007	48967351	TFAP2C	chr1	48966269	48966280
ATF7IP	activation	chr1	48966007	48967351	TCF12	chr1	48966364	48966374
ATF7IP	activation	chr1	48966007	48967351	TCF12	chr1	48966365	48966375
ATF7IP	activation	chr1	48966007	48967351	TFAP2C	chr1	48966510	48966521
ATF7IP	activation	chr1	48966007	48967351	ZIC3	chr1	48966539	48966553
ATF7IP	activation	chr1	48966007	48967351	TFAP2C	chr1	48966540	48966553
ATF7IP	activation	chr1	48966007	48967351	ZIC2	chr1	48966566	48966579
ATF7IP	activation	chr1	48966007	48967351	MYC	chr1	48966581	48966592
ATF7IP	activation	chr1	48966007	48967351	ZIC2	chr1	48966583	48966596
ATF7IP	activation	chr1	48966007	48967351	NFKB2	chr1	48966613	48966625
ATF7IP	activation	chr1	48966007	48967351	ZIC3	chr1	48966617	48966631
ATF7IP	activation	chr1	48966007	48967351	ELF1	chr1	48966646	48966659
ATF7IP	activation	chr1	48966007	48967351	KLF5	chr1	48966682	48966691
ATF7IP	activation	chr1	48966007	48967351	MYCN	chr1	48966695	48966706
ATF7IP	activation	chr1	48966007	48967351	TFAP2A	chr1	48966706	48966717
ATF7IP	activation	chr1	48966007	48967351	TFAP2C	chr1	48966706	48966717
ATF7IP	activation	chr1	48966007	48967351	MYCN	chr1	48966750	48966761
ATF7IP	activation	chr1	48966007	48967351	TFAP2A	chr1	48966750	48966762
ATF7IP	activation	chr1	48966007	48967351	TFAP2C	chr1	48966750	48966762
ATF7IP	activation	chr1	48966007	48967351	TFAP2A	chr1	48966775	48966787
ATF7IP	activation	chr1	48966007	48967351	TFAP2C	chr1	48966775	48966787
ATF7IP	activation	chr1	48966007	48967351	TBX3	chr1	48966821	48966830
ATF7IP	activation	chr1	48966007	48967351	KLF6	chr1	48966840	48966850
ATF7IP	activation	chr1	48966007	48967351	ZIC2	chr1	48966903	48966916
ATF7IP	activation	chr1	48966007	48967351	TFAP2C	chr1	48966942	48966955
ATF7IP	activation	chr1	48966007	48967351	TFAP2A	chr1	48966997	48967010
ATF7IP	activation	chr1	48966007	48967351	TFAP2A	chr1	48966997	48967008
ATF7IP	activation	chr1	48966007	48967351	TFAP2C	chr1	48966997	48967010
ATF7IP	activation	chr1	48966007	48967351	TFAP2C	chr1	48966997	48967008
ATF7IP	activation	chr1	48966007	48967351	ELF1	chr1	48967091	48967104
ATF7IP	activation	chr1	48966007	48967351	GLI2	chr1	48967262	48967276
ATF7IP	activation	chr1	48966007	48967351	KLF5	chr1	48967292	48967301
ATF7IP	activation	chr1	48987729	48988070	GLI2	chr1	48987777	48987791
ATF7IP	activation	chr1	48987729	48988070	RREB1	chr1	48987777	48987796
ATF7IP	activation	chr1	48987729	48988070	MYCN	chr1	48987958	48987969
ATF7IP	activation	chr1	48991305	48991516	TFAP2A	chr1	48991364	48991377
ATF7IP	activation	chr1	48991305	48991516	TFAP2C	chr1	48991364	48991377
ATF7IP	activation	chr1	48993428	48993628	ZIC2	chr1	48993514	48993527
ATF7IP	activation	chr1	48993428	48993628	TBX3	chr1	48993521	48993530
ATF7IP	activation	chr1	48993428	48993628	TCF12	chr1	48993546	48993556
ATF7IP	activation	chr1	48993428	48993628	TCF12	chr1	48993547	48993557
ATF7IP	activation	chr1	48993428	48993628	ELF1	chr1	48993563	48993576
ATF7IP	activation	chr1	48997891	48998080	MYC	chr1	48997949	48997960
ATF7IP	activation	chr1	48997891	48998080	KLF6	chr1	48998047	48998057
ATF7IP	activation	chr1	49000329	49000894	TCF12	chr1	49000512	49000522
ATF7IP	activation	chr1	49000329	49000894	TCF7L1	chr1	49000583	49000594
ATF7IP	activation	chr1	49000329	49000894	SALL1	chr1	49000629	49000639
ATF7IP	activation	chr1	49001125	49001424	ZIC2	chr1	49001163	49001176
ATF7IP	activation	chr1	49001125	49001424	ZIC2	chr1	49001324	49001337
ATF7IP	activation	chr1	49001125	49001424	NANOG	chr1	49001346	49001356
ATF7IP	activation	chr1	49001125	49001424	SOX13	chr1	49001346	49001356
ATF7IP	activation	chr1	49001125	49001424	SOX2	chr1	49001346	49001356
ATF7IP	activation	chr1	49002721	49002995	TCF12	chr1	49002851	49002861
ATF7IP	activation	chr1	49002721	49002995	TCF12	chr1	49002852	49002862
ATF7IP	activation	chr1	49009758	49009938	HIC2	chr1	49009865	49009873
ATF7IP	activation	chr1	49009758	49009938	BACH1	chr1	49009882	49009894
ATF7IP	activation	chr1	49012645	49012815	TFAP2A	chr1	49012668	49012680
ATF7IP	activation	chr1	49012645	49012815	TFAP2C	chr1	49012668	49012680
ATF7IP	activation	chr1	49012645	49012815	SOX4	chr1	49012751	49012760
ATF7IP	activation	chr1	49012645	49012815	SOX3	chr1	49012752	49012761
ATF7IP	activation	chr1	49025904	49027396	TBX3	chr1	49026035	49026044
ATF7IP	activation	chr1	49025904	49027396	MGA	chr1	49026036	49026043
ATF7IP	activation	chr1	49025904	49027396	HIC2	chr1	49026055	49026063
ATF7IP	activation	chr1	49025904	49027396	HIC2	chr1	49026076	49026084
ATF7IP	activation	chr1	49025904	49027396	ZIC2	chr1	49026093	49026106
ATF7IP	activation	chr1	49025904	49027396	MGA	chr1	49026116	49026123
ATF7IP	activation	chr1	49025904	49027396	TFAP2A	chr1	49026134	49026145
ATF7IP	activation	chr1	49025904	49027396	TFAP2C	chr1	49026134	49026145
ATF7IP	activation	chr1	49025904	49027396	TCF7L2	chr1	49026241	49026254
ATF7IP	activation	chr1	49025904	49027396	TFAP2A	chr1	49026358	49026371
ATF7IP	activation	chr1	49025904	49027396	TFAP2C	chr1	49026358	49026371
ATF7IP	activation	chr1	49025904	49027396	KLF6	chr1	49026395	49026405
ATF7IP	activation	chr1	49025904	49027396	ETV5	chr1	49026455	49026465
ATF7IP	activation	chr1	49025904	49027396	TFAP2A	chr1	49026623	49026635
ATF7IP	activation	chr1	49025904	49027396	TFAP2A	chr1	49026758	49026771
ATF7IP	activation	chr1	49025904	49027396	TFAP2C	chr1	49026758	49026771
ATF7IP	activation	chr1	49025904	49027396	ZIC2	chr1	49026758	49026771
ATF7IP	activation	chr1	49025904	49027396	TFAP2A	chr1	49026760	49026771
ATF7IP	activation	chr1	49025904	49027396	TFAP2A	chr1	49026760	49026772
ATF7IP	activation	chr1	49025904	49027396	TFAP2C	chr1	49026760	49026772
ATF7IP	activation	chr1	49025904	49027396	SOX3	chr1	49026781	49026790
ATF7IP	activation	chr1	49025904	49027396	ZIC2	chr1	49026800	49026813
ATF7IP	activation	chr1	49025904	49027396	TCF12	chr1	49026802	49026812
ATF7IP	activation	chr1	49025904	49027396	MEIS2	chr1	49027002	49027009
ATF7IP	activation	chr1	49025904	49027396	MYC	chr1	49027044	49027055
ATF7IP	activation	chr1	49025904	49027396	HES1	chr1	49027045	49027054
ATF7IP	activation	chr1	49025904	49027396	ZIC2	chr1	49027055	49027068
ATF7IP	activation	chr1	49025904	49027396	TFAP2A	chr1	49027151	49027164
ATF7IP	activation	chr1	49025904	49027396	TFAP2C	chr1	49027151	49027164
ATF7IP	activation	chr1	49025904	49027396	TFAP2C	chr1	49027153	49027164
ATF7IP	activation	chr1	49025904	49027396	ZIC2	chr1	49027166	49027179
ATF7IP	activation	chr1	49025904	49027396	HIC2	chr1	49027302	49027310
ATF7IP	repression_index_5	chr1	49029818	49030043	TFAP2A	chr1	49029825	49029838
ATF7IP	repression_index_5	chr1	49029818	49030043	TBX3	chr1	49029919	49029928
ATF7IP	activation	chr1	49083465	49085225	SOX3	chr1	49083480	49083489
ATF7IP	activation	chr1	49083465	49085225	SOX4	chr1	49083481	49083490
ATF7IP	activation	chr1	49083465	49085225	TCF12	chr1	49083519	49083529
ATF7IP	activation	chr1	49083465	49085225	ZNF821	chr1	49083610	49083624
ATF7IP	activation	chr1	49083465	49085225	EOMES	chr1	49083684	49083696
ATF7IP	activation	chr1	49083465	49085225	TBX3	chr1	49083687	49083696
ATF7IP	activation	chr1	49083465	49085225	MGA	chr1	49083688	49083695
ATF7IP	activation	chr1	49083465	49085225	EOMES	chr1	49083892	49083904
ATF7IP	activation	chr1	49083465	49085225	TBX3	chr1	49083895	49083904
ATF7IP	activation	chr1	49083465	49085225	MGA	chr1	49083896	49083903
ATF7IP	activation	chr1	49083465	49085225	KLF5	chr1	49083920	49083929
ATF7IP	activation	chr1	49083465	49085225	TFAP2C	chr1	49083943	49083956
ATF7IP	activation	chr1	49083465	49085225	ZIC2	chr1	49083946	49083959
ATF7IP	activation	chr1	49083465	49085225	NFKB2	chr1	49083953	49083965
ATF7IP	activation	chr1	49083465	49085225	TFAP2A	chr1	49083959	49083972
ATF7IP	activation	chr1	49083465	49085225	TFAP2C	chr1	49083959	49083972
ATF7IP	activation	chr1	49083465	49085225	TFAP2A	chr1	49083960	49083972
ATF7IP	activation	chr1	49083465	49085225	TFAP2A	chr1	49083960	49083973
ATF7IP	activation	chr1	49083465	49085225	TFAP2C	chr1	49083960	49083972
ATF7IP	activation	chr1	49083465	49085225	TFAP2A	chr1	49083961	49083972
ATF7IP	activation	chr1	49083465	49085225	TFAP2C	chr1	49083961	49083972
ATF7IP	activation	chr1	49083465	49085225	TFAP2C	chr1	49084016	49084029
ATF7IP	activation	chr1	49083465	49085225	ZIC3	chr1	49084020	49084034
ATF7IP	activation	chr1	49083465	49085225	KLF5	chr1	49084029	49084038
ATF7IP	activation	chr1	49083465	49085225	HES1	chr1	49084075	49084084
ATF7IP	activation	chr1	49083465	49085225	HEY1	chr1	49084075	49084084
ATF7IP	activation	chr1	49083465	49085225	TFAP2A	chr1	49084147	49084158
ATF7IP	activation	chr1	49083465	49085225	TFAP2C	chr1	49084147	49084158
ATF7IP	activation	chr1	49083465	49085225	KLF6	chr1	49084201	49084211
ATF7IP	activation	chr1	49083465	49085225	TFAP2A	chr1	49084221	49084234
ATF7IP	activation	chr1	49083465	49085225	TFAP2C	chr1	49084221	49084234
ATF7IP	activation	chr1	49083465	49085225	TFAP2A	chr1	49084223	49084234
ATF7IP	activation	chr1	49083465	49085225	TFAP2C	chr1	49084223	49084234
ATF7IP	activation	chr1	49083465	49085225	BHLHE40	chr1	49084231	49084240
ATF7IP	activation	chr1	49083465	49085225	HES1	chr1	49084231	49084240
ATF7IP	activation	chr1	49083465	49085225	HEY1	chr1	49084231	49084240
ATF7IP	activation	chr1	49083465	49085225	TFAP2A	chr1	49084240	49084253
ATF7IP	activation	chr1	49083465	49085225	TFAP2C	chr1	49084240	49084253
ATF7IP	activation	chr1	49083465	49085225	TFAP2A	chr1	49084242	49084253
ATF7IP	activation	chr1	49083465	49085225	TFAP2C	chr1	49084242	49084253
ATF7IP	activation	chr1	49083465	49085225	KLF5	chr1	49084337	49084346
ATF7IP	activation	chr1	49083465	49085225	KLF5	chr1	49084348	49084357
ATF7IP	activation	chr1	49083465	49085225	KLF5	chr1	49084361	49084370
ATF7IP	activation	chr1	49083465	49085225	TFAP2C	chr1	49084392	49084405
ATF7IP	activation	chr1	49083465	49085225	RREB1	chr1	49084414	49084433
ATF7IP	activation	chr1	49083465	49085225	KLF5	chr1	49084416	49084425
ATF7IP	activation	chr1	49083465	49085225	KLF6	chr1	49084416	49084426
ATF7IP	activation	chr1	49083465	49085225	RREB1	chr1	49084418	49084437
ATF7IP	activation	chr1	49083465	49085225	KLF5	chr1	49084424	49084433
ATF7IP	activation	chr1	49083465	49085225	KLF6	chr1	49084424	49084434
ATF7IP	activation	chr1	49083465	49085225	MEIS2	chr1	49084476	49084483
ATF7IP	activation	chr1	49083465	49085225	TFAP2C	chr1	49084482	49084495
ATF7IP	activation	chr1	49083465	49085225	TFAP2C	chr1	49084548	49084561
ATF7IP	activation	chr1	49083465	49085225	TFAP2A	chr1	49084634	49084646
ATF7IP	activation	chr1	49083465	49085225	TFAP2C	chr1	49084642	49084655
ATF7IP	activation	chr1	49083465	49085225	ZIC2	chr1	49084656	49084669
ATF7IP	activation	chr1	49083465	49085225	TFAP2A	chr1	49084667	49084679
ATF7IP	activation	chr1	49083465	49085225	TFAP2C	chr1	49084667	49084679
ATF7IP	activation	chr1	49083465	49085225	TFAP2A	chr1	49084669	49084680
ATF7IP	activation	chr1	49083465	49085225	TFAP2C	chr1	49084669	49084680
ATF7IP	activation	chr1	49083465	49085225	TFAP2C	chr1	49084725	49084738
ATF7IP	activation	chr1	49083465	49085225	ZIC2	chr1	49084725	49084738
ATF7IP	activation	chr1	49083465	49085225	ZIC3	chr1	49084726	49084740
ATF7IP	activation	chr1	49083465	49085225	TFAP2A	chr1	49084762	49084773
ATF7IP	activation	chr1	49083465	49085225	ZIC2	chr1	49084824	49084837
ATF7IP	activation	chr1	49083465	49085225	KLF5	chr1	49084864	49084873
ATF7IP	activation	chr1	49083465	49085225	KLF5	chr1	49084878	49084887
ATF7IP	activation	chr1	49083465	49085225	ETV5	chr1	49084886	49084896
ATF7IP	activation	chr1	49083465	49085225	KLF5	chr1	49084967	49084976
ATF7IP	activation	chr1	49083465	49085225	SP4	chr1	49084968	49084984
ATF7IP	activation	chr1	49083465	49085225	KLF5	chr1	49084972	49084981
ATF7IP	activation	chr1	49083465	49085225	ZNF821	chr1	49085011	49085025
ATF7IP	activation	chr1	49083465	49085225	ELF1	chr1	49085022	49085035
ATF7IP	activation	chr1	49083465	49085225	ZIC2	chr1	49085127	49085140
ATF7IP	activation	chr1	49083465	49085225	TCF12	chr1	49085131	49085141
MKL1	activation	chr1	49981788	49982547	TFAP2A	chr1	49981813	49981825
MKL1	activation	chr1	49981788	49982547	TFAP2C	chr1	49981813	49981825
MKL1	activation	chr1	49981788	49982547	ZIC3	chr1	49981884	49981898
MKL1	activation	chr1	49981788	49982547	TCF12	chr1	49981885	49981895
MKL1	activation	chr1	49981788	49982547	ZIC2	chr1	49981886	49981899
MKL1	activation	chr1	49981788	49982547	TCF12	chr1	49981897	49981907
MKL1	activation	chr1	49981788	49982547	HIF1A	chr1	49982031	49982040
MKL1	activation	chr1	49981788	49982547	MYC	chr1	49982031	49982042
MKL1	activation	chr1	49981788	49982547	BHLHE40	chr1	49982032	49982041
MKL1	activation	chr1	49981788	49982547	HEY1	chr1	49982032	49982041
MKL1	activation	chr1	49981788	49982547	HIF1A	chr1	49982033	49982042
MKL1	activation	chr1	49981788	49982547	ZIC2	chr1	49982088	49982101
MKL1	activation	chr1	49981788	49982547	ELF1	chr1	49982278	49982291
MKL1	activation	chr1	49981788	49982547	ETV5	chr1	49982279	49982289
MKL1	activation	chr1	49981788	49982547	ELF1	chr1	49982286	49982299
MKL1	activation	chr1	49981788	49982547	ETV5	chr1	49982288	49982298
MKL1	activation	chr1	49989560	49989840	MEIS2	chr1	49989590	49989604
MKL1	activation	chr1	49989560	49989840	KLF6	chr1	49989614	49989624
MKL1	activation	chr1	49989560	49989840	KLF5	chr1	49989631	49989640
MKL1	activation	chr1	49989560	49989840	MYC	chr1	49989727	49989738
MKL1	activation	chr1	49989560	49989840	ZIC2	chr1	49989736	49989749
MKL1	activation	chr1	49989560	49989840	TCF12	chr1	49989769	49989779
MKL1	activation	chr1	49991439	49991652	ZIC2	chr1	49991496	49991509
MKL1	activation	chr1	49991439	49991652	TFAP2A	chr1	49991531	49991542
MKL1	activation	chr1	49991439	49991652	TFAP2C	chr1	49991531	49991542
MKL1	activation	chr1	49991439	49991652	EOMES	chr1	49991578	49991590
MKL1	activation	chr1	49991439	49991652	KLF6	chr1	49991580	49991590
MKL1	activation	chr1	49991439	49991652	TBX3	chr1	49991581	49991590
MKL1	activation	chr1	49991439	49991652	MGA	chr1	49991582	49991589
MKL1	activation	chr1	49996939	49999196	TCF12	chr1	49996977	49996987
MKL1	activation	chr1	49996939	49999196	TFAP2A	chr1	49997086	49997099
MKL1	activation	chr1	49996939	49999196	DLX5	chr1	49997305	49997312
MKL1	activation	chr1	49996939	49999196	MSX1	chr1	49997305	49997312
MKL1	activation	chr1	49996939	49999196	KLF5	chr1	49997400	49997409
MKL1	activation	chr1	49996939	49999196	ZIC2	chr1	49997411	49997424
MKL1	activation	chr1	49996939	49999196	MYC	chr1	49997429	49997440
MKL1	activation	chr1	49996939	49999196	NFKB2	chr1	49997630	49997642
MKL1	activation	chr1	49996939	49999196	MEIS2	chr1	49997649	49997663
MKL1	activation	chr1	49996939	49999196	MEIS1	chr1	49997650	49997662
MKL1	activation	chr1	49996939	49999196	TFAP2C	chr1	49997795	49997808
MKL1	activation	chr1	49996939	49999196	KLF5	chr1	49997837	49997846
MKL1	activation	chr1	49996939	49999196	HESX1	chr1	49997855	49997864
MKL1	activation	chr1	49996939	49999196	TBX3	chr1	49997972	49997981
MKL1	activation	chr1	49996939	49999196	TFAP2A	chr1	49997980	49997993
MKL1	activation	chr1	49996939	49999196	TFAP2C	chr1	49997980	49997993
MKL1	activation	chr1	49996939	49999196	KLF5	chr1	49998056	49998065
MKL1	activation	chr1	49996939	49999196	KLF5	chr1	49998082	49998091
MKL1	activation	chr1	49996939	49999196	KLF6	chr1	49998156	49998166
MKL1	activation	chr1	49996939	49999196	KLF5	chr1	49998157	49998166
MKL1	activation	chr1	49996939	49999196	SP4	chr1	49998159	49998175
MKL1	activation	chr1	49996939	49999196	KLF6	chr1	49998161	49998171
MKL1	activation	chr1	49996939	49999196	KLF5	chr1	49998162	49998171
MKL1	activation	chr1	49996939	49999196	ATF3	chr1	49998172	49998183
MKL1	activation	chr1	49996939	49999196	TFAP2C	chr1	49998205	49998218
MKL1	activation	chr1	49996939	49999196	TFAP2A	chr1	49998206	49998217
MKL1	activation	chr1	49996939	49999196	TCF12	chr1	49998213	49998223
MKL1	activation	chr1	49996939	49999196	SP4	chr1	49998225	49998241
MKL1	activation	chr1	49996939	49999196	KLF6	chr1	49998227	49998237
MKL1	activation	chr1	49996939	49999196	KLF5	chr1	49998228	49998237
MKL1	activation	chr1	49996939	49999196	SP4	chr1	49998230	49998246
MKL1	activation	chr1	49996939	49999196	KLF6	chr1	49998232	49998242
MKL1	activation	chr1	49996939	49999196	KLF5	chr1	49998233	49998242
MKL1	activation	chr1	49996939	49999196	TFAP2A	chr1	49998248	49998261
MKL1	activation	chr1	49996939	49999196	TFAP2C	chr1	49998248	49998261
MKL1	activation	chr1	49996939	49999196	TFAP2A	chr1	49998250	49998261
MKL1	activation	chr1	49996939	49999196	TFAP2A	chr1	49998291	49998302
MKL1	activation	chr1	49996939	49999196	TFAP2C	chr1	49998291	49998304
MKL1	activation	chr1	49996939	49999196	TFAP2A	chr1	49998340	49998352
MKL1	activation	chr1	49996939	49999196	TFAP2C	chr1	49998340	49998352
MKL1	activation	chr1	49996939	49999196	ETV5	chr1	49998369	49998379
MKL1	activation	chr1	49996939	49999196	KLF5	chr1	49998462	49998471
MKL1	activation	chr1	49996939	49999196	TFAP2A	chr1	49998471	49998482
MKL1	activation	chr1	49996939	49999196	TFAP2C	chr1	49998521	49998534
MKL1	activation	chr1	49996939	49999196	SP4	chr1	49998555	49998571
MKL1	activation	chr1	49996939	49999196	RREB1	chr1	49998558	49998577
MKL1	activation	chr1	49996939	49999196	KLF5	chr1	49998559	49998568
MKL1	activation	chr1	49996939	49999196	KLF6	chr1	49998559	49998569
MKL1	activation	chr1	49996939	49999196	KLF5	chr1	49998564	49998573
MKL1	activation	chr1	49996939	49999196	KLF6	chr1	49998564	49998574
MKL1	activation	chr1	49996939	49999196	TFAP2A	chr1	49998589	49998602
MKL1	activation	chr1	49996939	49999196	TFAP2C	chr1	49998589	49998602
MKL1	activation	chr1	49996939	49999196	TFAP2A	chr1	49998591	49998602
MKL1	activation	chr1	49996939	49999196	TFAP2C	chr1	49998591	49998602
MKL1	activation	chr1	49996939	49999196	KLF6	chr1	49998617	49998627
MKL1	activation	chr1	49996939	49999196	TFAP2C	chr1	49998631	49998644
MKL1	activation	chr1	49996939	49999196	KLF6	chr1	49998643	49998653
MKL1	activation	chr1	49996939	49999196	KLF5	chr1	49998644	49998653
MKL1	activation	chr1	49996939	49999196	TFAP2A	chr1	49998648	49998660
MKL1	activation	chr1	49996939	49999196	TFAP2C	chr1	49998648	49998660
MKL1	activation	chr1	49996939	49999196	TFAP2A	chr1	49998680	49998692
MKL1	activation	chr1	49996939	49999196	TFAP2C	chr1	49998680	49998692
MKL1	activation	chr1	49996939	49999196	TFAP2C	chr1	49998680	49998693
MKL1	activation	chr1	49996939	49999196	TFAP2A	chr1	49998681	49998693
MKL1	activation	chr1	49996939	49999196	TFAP2A	chr1	49998681	49998692
MKL1	activation	chr1	49996939	49999196	TFAP2C	chr1	49998681	49998693
[truncated: 56,352 more rows]
