# Supplementary material for: A gene regulatory network for neural induction
Source: eLife. 2023 Mar 3;12:e73189. doi: 10.7554/eLife.73189 (PMC10038663; doi:10.7554/eLife.73189)
Supplement: Figure 7—source data 1. [file elife-73189-fig7-data1.xlsx]

## Sheet: Suppl Table
Supplementary Table. Upregulated transcriptional regulator in situ expression patterns
							("neural induction") AND (GENE)
Transcriptional Regulator	Differential Expression	DE in galGal3?	DE in galGal4?	In Situ Status	Figure	Published Expression in Chick Embryos	Previously associated with Neural Induction?	Expressed in neural territories of the E7.0 mouse embryo (in iTranscriptome database A1-11)
BLIMP1 (PRDM1)	Upregulated	Gal3	Gal4	Expression confirmed	Suppl File S3	Ha and Riddle, 2003	N	Y
BMI1	Upregulated	Gal3	Gal4	Expression confirmed	Suppl File S3	Fraser and Sauka-Spengler, 2005	N	Y
CBFA2T2	Upregulated	-	Gal4	Expression confirmed	Suppl File S3	Koyano-Nakagawa and Kintner, 2006	N	Y
CBX1	Upregulated	-	Gal4	Expression confirmed	Suppl File S3	-	N	Y
CCND1	Upregulated	Gal3	Gal4	Expression confirmed	Suppl File S3	Lobjois et al., 2004	N	Y
CDCA7	Upregulated	Gal3	Gal4	Expression confirmed	Suppl File S3	-	N	Y
CITED4	Upregulated	Gal3	Gal4	Expression confirmed	Figure 5	Andrews et al., 2000	N	Y
CRIP2	Upregulated	-	Gal4	Expression confirmed	Suppl File S3	-	PMID: 18292601 crest induction	Y
DACH1	Upregulated	Gal3	Gal4	Expression confirmed	Suppl File S3	Heanue et al., 2002	N	Y
DMBX1	Upregulated	Gal3	-	Expression confirmed	Suppl File S3	Ferran et al., 2007	N	Y
DNMT3A	Upregulated	Gal3	Gal4	Expression confirmed	Suppl File S3	Hu et al., 2012	N	Y
DNMT3B	Upregulated	Gal3	Gal4	Expression confirmed	Suppl File S3	Rengaraj et al., 2011	N	Y
ENC1	Upregulated	Gal3	Gal4	Expression confirmed	Suppl File S3	Garcia-Calero and Puelles, 2009	PMID: 9096139	Y
EOMES	Upregulated	Gal3	Gal4	Expression confirmed	Suppl File S3	Jean et al., 2015	N	Y
ERNI	Upregulated	-	Gal4	Expression confirmed	Figure 5	Streit et al., 2000	PMID: 10894544	N/A
ENS-1	Upregulated	Gal3	Gal4	Same as ERNI	-	-	as above	N/A
ENS-3	Upregulated	Gal3	Gal4	Same as ERNI	-	-	as above	N/A
ETV1	Upregulated	Gal3	Gal4	Expression confirmed	Suppl File S3	Lunn et al., 2007	PMID: 31297611 crest induction	Y
ETV4	Upregulated	Gal3	Gal4	Expression confirmed	Suppl File S3	Lunn et al., 2007	N	Y
ETV5	Upregulated	Gal3	Gal4	Expression confirmed	Suppl File S3	Lunn et al., 2007	N	Y
EYA2	Upregulated	Gal3	-	Expression confirmed	Suppl File S3	Mishima and Tomarev, 1999	N	Y
EZH2	Upregulated	-	Gal4	Expression confirmed	Suppl File S3	Akizu et al., 2016	N	Y
FEZF2	Upregulated	Gal3	Gal4	Expression confirmed	Suppl File S3	-	N	N
FOXD3	Upregulated	Gal3	-	Expression confirmed	Suppl File S3	Kos et al., 2001	N	Y
GBX2	Upregulated	Gal3	Gal4	Expression confirmed	Suppl File S3	Shamim and Mason, 1998	PMID: 10985856	Y
GLI2	Upregulated	Gal3	-	Expression confirmed	Figure 5	Marigo et al., 1996, Schweitzer et al., 2000	N	Y
GLI3	Upregulated	Gal3	-	Expression confirmed	Suppl File S3	Marigo et al., 1996, Schweitzer et al., 2000	PMID: 26290227	Y
HESX1	Upregulated	Gal3	Gal4	Expression confirmed	Suppl File S3	Chapman et al., 2002	PMID: 11291863	Y
HEY1	Upregulated	Gal3	-	Expression confirmed	Suppl File S3	Leimeister et al., 2000	N	Y
HIVEP3	Upregulated	-	Gal4	Expression confirmed	Suppl File S3	-	N	Y
HOXB1	Upregulated	Gal3	Gal4	Expression confirmed	Suppl File S3	Paxton et al., 2010	PMID: 20142486	N
IGHMBP2	Upregulated	Gal3	-	Not assessed	-	-	N	Y
ING5	Upregulated	Gal3	-	Expression confirmed	Suppl File S3	Hintze et al., 2017, Trevers et al., 2018	N	Y
IRX2	Upregulated	Gal3	Gal4	Expression confirmed	Suppl File S3	Goriely, Diez del Corral and Storey, 199	PMID: 14732407	Y
IVNS1ABP	Upregulated	-	Gal4	Expression confirmed	Suppl File S3	-	N	Y
KAT2B	Upregulated	-	Gal4	Expression confirmed	Suppl File S3	-	N	Y
KDM4A	Upregulated	-	Gal4	Expression confirmed	Suppl File S3	Strobl-Mazzulla, Sauka-Spengler and Bronner-Fraser, 2010	N	Y
LHX5	Upregulated	Gal3	Gal4	Expression confirmed	Suppl File S3	Kawaue et al., 2012	N	N
LIN28A	Upregulated	-	Gal4	Expression confirmed	Suppl File S3	Jean et al., 2015	N	Y
LIN28B	Upregulated	-	Gal4	Expression confirmed	Suppl File S3	Bobbs et al., 2012, Jean et al., 2015	N	Y
LMO1	Upregulated	Gal3	Gal4	Expression confirmed	Suppl File S3	Bangs et al., 2010	N	Y
LMX1B	Upregulated	Gal3	-	Expression confirmed	Suppl File S3	Riddle et al., 1995	PMID: 15715675	Y
LOC422067	Upregulated	Gal3	-	Not assessed	-	-	N	N/A
MAFA	Upregulated	Gal3	Gal4	Expression confirmed	Figure 5	Ogino and Yasuda, 1998	N	N
MAML2	Upregulated	-	Gal4	Expression confirmed	Suppl File S3	-	N	Y
MEIS1	Upregulated	Gal3	-	Expression confirmed	Suppl File S3	Mercader et al., 1999	N	Y
MEIS2	Upregulated	Gal3	Gal4	Expression confirmed	Suppl File S3	Mercader et al., 1999	N	Y
MTA1	Upregulated	Gal3	Gal4	Expression confirmed	Suppl File S3	-	N	Y
MYCN	Upregulated	Gal3	Gal4	Expression confirmed	Suppl File S3	Khudyakov and Bronner-Fraser, 2010	N	Y
MYT1L	Upregulated	Gal3	-	Not assessed	-	-	N	Y
NKX1-2	Upregulated	Gal3	-	Expression confirmed	Suppl File S3	Spann et al., 1994	N	Y
NKX6-2	Upregulated	-	Gal4	Expression confirmed	Suppl File S3	Cai et al., 1999	N	Y
NOT1	Upregulated	Gal3	Gal4	Expression confirmed	Suppl File S3	Knezevic et al., 1995, Stein et al., 1996	N	N
NOT2	Upregulated	Gal3	Gal4	Expression confirmed	Suppl File S3	Stein et al., 1996, Knezevic and Mackem, 2001	N	Y
NRIP1	Upregulated	Gal3	Gal4	Expression confirmed	Suppl File S3	-	N	Y
NSD1	Upregulated	Gal3	Gal4	Expression confirmed	Suppl File S3	Hintze et al., 2017, Trevers et al., 2018	N	Y
OTX2	Upregulated	Gal3	Gal4	Expression confirmed	Suppl File S3	Bally-Cuif et al., 1995	PMID: 27279156	Y
PDCD4	Upregulated	Gal3	-	Expression confirmed	Suppl File S3	-	N	Y
PDLIM4	Upregulated	Gal3	Gal4	Expression confirmed	Suppl File S3	Trevers et al., 2018	N	Y
PHF15	Upregulated	Gal3	-	Expression confirmed	Suppl File S3	Trevers et al., 2018	N	N/A
PHTF1	Upregulated	-	Gal4	Expression confirmed	Suppl File S3	-	N	Y
PRDM14	Upregulated	-	Gal4	Expression confirmed	Suppl File S3	Okuzaki et al., 2019	N	N/A
RB1	Upregulated	Gal3	-	Expression confirmed	Suppl File S3	Wagner et al., 2001	N	Y
RFX3	Upregulated	Gal3	-	Expression confirmed	Suppl File S3	-	N	Y
RUNX1T1	Upregulated	Gal3	Gal4	Expression confirmed	Suppl File S3	Koyano-Nakagawa and Kintner, 2005	N	Y
SALL1	Upregulated	Gal3	Gal4	Expression confirmed	Suppl File S3	Sweetman et al., 2005	N	Y
SETD2	Upregulated	Gal3	Gal4	Expression confirmed	Suppl File S3	Hintze et al., 2017, Trevers et al., 2018	N	Y
SIX3	Upregulated	-	Gal4	Expression confirmed	Suppl File S3	Bovolenta et al., 1998	N	Y
SNAI1	Upregulated	Gal3	-	Expression confirmed	Suppl File S3	Sefton, Sanchez and Nieto, 1998	PMID: 35578118	Y
SOX1	Upregulated	Gal3	Gal4	Expression confirmed	Figure 5	Stavridis et al., 2010, Uchikawa et al., 2011	PMID: 27888190	N
SOX11	Upregulated	Gal3	Gal4	Expression confirmed	Suppl File S3	Uwanogho et al., 1995	PMID: 12047350	Y
SOX13	Upregulated	Gal3	Gal4	Expression confirmed	Suppl File S3	Chen et al., 2017	N	Y
SOX2	Upregulated	Gal3	Gal4	Expression confirmed	Figure 5	Rex et al., 1997	PMID: 9215646	Y
SOX3	Upregulated	Gal3	Gal4	Expression confirmed	Figure 5	Rex et al., 1997	PMID: 9215646	Y
SP5	Upregulated	Gal3	-	Expression confirmed	Suppl File S3	-	PMID: 24038420	N
STOX1	Upregulated	Gal3	Gal4	Expression confirmed	Suppl File S3	Kee et al., 2007	N	N
STOX2	Upregulated	Gal3	-	Expression confirmed	Suppl File S3	Hintze et al., 2017	N	Y
T	Upregulated	Gal3	Gal4	Expression confirmed	Suppl File S3	Kispert et al., 1995	PMID: 14651851	Y
TAF1A	Upregulated	Gal3	-	Expression confirmed	Suppl File S3	-	N	Y
TBL1XR1	Upregulated	Gal3	Gal4	Expression confirmed	Suppl File S3	-	N	Y
TBX6	Upregulated	Gal3	-	Expression confirmed	Suppl File S3	Knezevic et al., 1997	PMID: 9490412	N
TCF12	Upregulated	-	Gal4	Expression confirmed	Suppl File S3	-	PMID: 15018808	Y
TCF7L1	Upregulated	-	Gal4	Expression confirmed	Suppl File S3	Schmidt et al., 2004	N	Y
TCF7L2	Upregulated	-	Gal4	Expression confirmed	Suppl File S3	Hartmann and Tabin, 2000	N	Y
TGIF1	Upregulated	Gal3	Gal4	Expression confirmed	Suppl File S3	Lorda-Diez et al., 2009	N	Y
TRIM24	Upregulated	Gal3	Gal4	Expression confirmed	Suppl File S3	Hintze et al., 2017, Trevers et al., 2018	N	Y
TRIM9	Upregulated	Gal3	Gal4	Expression confirmed	Suppl File S3	-	N	Y
YEATS4	Upregulated	Gal3	Gal4	Expression confirmed	Suppl File S3	Hintze et al., 2017, Trevers et al., 2018	N	Y
ZEB2	Upregulated	Gal3	Gal4	Expression confirmed	Suppl File S3	Sheng et al., 2003	PMID: 14651851	Y
ZIC2	Upregulated	-	Gal4	Expression confirmed	Suppl File S3	Warner et al., 2003, McMahon et al., 2010	PMID: 27279156	Y
ZIC3	Upregulated	Gal3	Gal4	Expression confirmed	Suppl File S3	Warner et al., 2003, McMahon et al., 2011	PMID: 14499648	Y
ZNF423	Upregulated	Gal3	Gal4	Expression confirmed	Figure 5	Hintze et al., 2017, Trevers et al., 2018	N	N/A
ZNF462	Upregulated	Gal3	Gal4	Expression confirmed	Suppl File S3	Hintze et al., 2017, Trevers et al., 2018	N	N/A
ZNF469	Upregulated	-	Gal4	Expression confirmed	Suppl File S3	-	N	N/A
