# Supplementary material for: A gene regulatory network for neural induction
Source: eLife. 2023 Mar 3;12:e73189. doi: 10.7554/eLife.73189 (PMC10038663; doi:10.7554/eLife.73189)
Supplement: Figure 7—source data 2. [file elife-73189-fig7-data2.xlsx]

## Sheet: Suppl Table S20
Supplementary Table S20. Downregulated transcriptional regulator in situ expression patterns
Transcriptional Regulator	Differential Expression	DE in galGal3?	DE in galGal4?	In Situ Status	Figure	Published Expression in Chick Embryos
AHR	Downregulated	Gal3	-	Expression confirmed	Suppl File S3	-
ARID5B	Downregulated	Gal3	Gal4	Expression confirmed	Suppl File S3	-
ATF1	Downregulated	Gal3	-	Not assessed	-	-
ATF3	Downregulated	Gal3	Gal4	Expression confirmed	Suppl File S3	-
BACH1	Downregulated	Gal3	Gal4	Expression confirmed	Suppl File S3	-
BACH2	Downregulated	Gal3	-	Expression confirmed	Suppl File S3	-
BHLHB2	Downregulated	Gal3	-	Expression confirmed	Suppl File S3	-
BHLHE40	Downregulated	-	Gal4	Same as BHLHB2	-	-
CDX2	Downregulated	Gal3	Gal4	Expression confirmed	Suppl File S3	Frumkin et al., 1993
CDX4	Downregulated	Gal3	-	Expression confirmed	Figure 5	Marom, Shapira and Fainsod, 1997
CEBPB	Downregulated	Gal3	-	Expression confirmed	Suppl File S3	-
CREB3L1	Downregulated	Gal3	-	Expression confirmed	Suppl File S3	-
CREG1	Downregulated	Gal3	-	Expression confirmed	Suppl File S3	-
CSRP2	Downregulated	Gal3	Gal4	Expression confirmed	Suppl File S3	Bonnin et al., 2002
DIP2C	Downregulated	Gal3	-	Expression confirmed	Suppl File S3	-
DLX3	Downregulated	-	Gal4	Expression confirmed	Suppl File S3	Pera and Kessel, 1999
DLX5	Downregulated	Gal3	Gal4	Expression confirmed	Figure 5	Ferrari et al., 1995
ELF1	Downregulated	Gal3	Gal4	Expression confirmed	Suppl File S3	-
ELF3	Downregulated	Gal3	-	Expression confirmed	Suppl File S3	-
HIF1A (EPAS1)	Downregulated	Gal3	Gal4	Expression confirmed	Figure 5	Ota et al., 2007
ESRRG	Downregulated	-	Gal4	Expression confirmed	Suppl File S3	-
ETS2	Downregulated	Gal3	Gal4	Expression confirmed	Suppl File S3	Mey et al., 2012
FOXO1/FKHR	Downregulated	-	Gal4	Expression confirmed	Suppl File S3	-
FOXO1A	Downregulated	Gal3	-	Expression confirmed	Suppl File S3	same as FOXO1
FOXO3	Downregulated	-	Gal4	Expression confirmed	Suppl File S3	-
FRY	Downregulated	-	Gal4	Expression confirmed	Suppl File S3	-
GATA2	Downregulated	Gal3	Gal4	Expression confirmed	Figure 5	Sheng and Stern, 1999, Sheng et al., 2003
GATA4	Downregulated	Gal3	-	Expression confirmed	Suppl File S3	Chapman et al., 2002, Jean et al., 2015
GATA5	Downregulated	Gal3	Gal4	Expression confirmed	Suppl File S3	Laverriere et al., 1994
GATA6	Downregulated	Gal3	Gal4	Expression confirmed	Suppl File S3	Laverriere et al., 1994
gga-mir-6596	Downregulated	-	Gal4	Not assessed	-	-
GRHL1	Downregulated	Gal3	Gal4	Expression confirmed	Suppl File S3	-
GRHL2	Downregulated	Gal3	Gal4	Expression confirmed	Suppl File S3	-
GRHL3	Downregulated	Gal3	Gal4	Expression confirmed	Figure 5	-
HAND1	Downregulated	-	Gal4	Expression confirmed	Suppl File S3	Srivastava et al., 1995
HIC2	Downregulated	-	Gal4	Expression confirmed	Suppl File S3	-
HIPK2	Downregulated	Gal3	-	Expression confirmed	Suppl File S3	-
HIVEP2	Downregulated	Gal3	Gal4	Expression confirmed	Suppl File S3	-
HNF1B	Downregulated	Gal3	-	Expression confirmed	Suppl File S3	Aragon and Pujades, 2009
HOXA1	Downregulated	-	Gal4	Expression confirmed	Suppl File S3	McClintock et al., 2003
HOXA2	Downregulated	Gal3	-	Expression confirmed	Suppl File S3	Prince and Lumsden, 1994
HOXC6	Downregulated	Gal3	-	Expression confirmed	Suppl File S3	Storey, Selleck and Stern 1994
ID2	Downregulated	Gal3	Gal4	Expression confirmed	Suppl File S3	Martinsen et al., 2004
ID3	Downregulated	-	Gal4	Expression confirmed	Suppl File S3	Kee and Bronner-Fraser, 2001
IRF7	Downregulated	Gal3	Gal4	Expression confirmed	Suppl File S3	-
ISX	Downregulated	-	Gal4	Expression confirmed	Figure 5	-
JMJD4	Downregulated	Gal3	-	Expression confirmed	Suppl File S3	-
KLF2	Downregulated	Gal3	-	Expression confirmed	Suppl File S3	Antin et al., 2010
KLF4	Downregulated	-	Gal4	Expression confirmed	Suppl File S3	Antin et al., 2010
KLF5	Downregulated	Gal3	Gal4	Expression confirmed	Suppl File S3	Antin et al., 2010
KLF6	Downregulated	Gal3	Gal4	Expression confirmed	Suppl File S3	Antin et al., 2010
LMO7	Downregulated	Gal3	Gal4	Expression confirmed	Suppl File S3	-
MBNL2	Downregulated	Gal3	Gal4	Expression confirmed	Suppl File S3	Huang et al., 2008
MEF2D	Downregulated	-	Gal4	Expression confirmed	Suppl File S3	Berti et al., 2015
MSX1	Downregulated	Gal3	Gal4	Expression confirmed	Suppl File S3	Suzuki et al., 1991
MSX2	Downregulated	Gal3	Gal4	Expression confirmed	Figure 5	Coelho et al., 1991, Brown et al., 1997
MYC	Downregulated	Gal3	Gal4	Expression confirmed	Suppl File S3	Khudyakov and Bronner-Fraser, 2009
NANOG	Downregulated	Gal3	Gal4	Expression confirmed	Suppl File S3	Lavial et al., 2007
NCOA2	Downregulated	-	Gal4	Expression confirmed	Suppl File S3	-
NFKBIZ	Downregulated	Gal3	Gal4	Expression confirmed	Suppl File S3	-
OVOL2	Downregulated	Gal3	-	Expression confirmed	Suppl File S3	-
PDLIM1	Downregulated	Gal3	Gal4	Expression confirmed	Suppl File S3	-
PDLIM5	Downregulated	Gal3	Gal4	Expression confirmed	Suppl File S3	-
PITX2	Downregulated	Gal3	Gal4	Expression confirmed	Suppl File S3	St Amand et al., 1998
PITX3	Downregulated	Gal3	-	Expression confirmed	Suppl File S3	-
PPARGC1A	Downregulated	Gal3	Gal4	Expression confirmed	Suppl File S3	-
PTRF	Downregulated	Gal3	Gal4	Expression confirmed	Suppl File S3	-
RARB	Downregulated	Gal3	Gal4	Expression confirmed	Suppl File S3	Mercader et al., 2000
RASSF7	Downregulated	Gal3	Gal4	Expression confirmed	Suppl File S3	-
RREB1	Downregulated	Gal3	Gal4	Expression confirmed	Suppl File S3	-
SCML2	Downregulated	Gal3	Gal4	Expression confirmed	Suppl File S3	-
SERTAD2	Downregulated	Gal3	-	Expression confirmed	Suppl File S3	-
SMAD6	Downregulated	Gal3	Gal4	Expression confirmed	Suppl File S3	Vargesson and Laufer, 2001
SMAD7	Downregulated	Gal3	-	Expression confirmed	Suppl File S3	Vargesson and Laufer, 2001
SMAD9	Downregulated	Gal3	-	Expression confirmed	Suppl File S3	Zuzarte-Luis et al., 2004
SMARCA2	Downregulated	Gal3	Gal4	Expression confirmed	Suppl File S3	-
TBX3	Downregulated	Gal3	Gal4	Expression confirmed	Suppl File S3	Yamada, et al 2000
TFAP2A	Downregulated	-	Gal4	Expression confirmed	Suppl File S3	Khudyakov and Bronner-Fraser, 2009
TFAP2C	Downregulated	-	Gal4	Expression confirmed	Suppl File S3	Qiao et al., 2012
TFAP2E	Downregulated	-	Gal4	Expression confirmed	Suppl File S3	-
TFCP2L1	Downregulated	-	Gal4	Expression confirmed	Suppl File S3	-
TRIM3	Downregulated	Gal3	Gal4	Expression confirmed	Suppl File S3	-
VGLL1	Downregulated	Gal3	Gal4	Expression confirmed	Figure 5	-
WWTR1	Downregulated	Gal3	-	Expression confirmed	Suppl File S3	-
ZBTB46	Downregulated	Gal3	-	Expression confirmed	Suppl File S3	-
ZFHX3	Downregulated	-	Gal4	Expression confirmed	Suppl File S3	-
ZFPM1	Downregulated	Gal3	Gal4	Expression confirmed	Suppl File S3	-
ZMYND11	Downregulated	Gal3	Gal4	Expression confirmed	Suppl File S3	-
ZNF185	Downregulated	-	Gal4	Expression confirmed	Suppl File S3	-
ZNF593	Downregulated	Gal3	-	Not assessed	-	-
