# Supplementary material for: A gene regulatory network for neural induction
Source: eLife. 2023 Mar 3;12:e73189. doi: 10.7554/eLife.73189 (PMC10038663; doi:10.7554/eLife.73189)
Supplement: Figure 7—source data 3. [file elife-73189-fig7-data3.xlsx]

## Sheet: Suppl Table S10
Supplementary Table S10. in situ probes by digest
Gene	Kind gift of	Linearised	Transcribed	Citation
BMI1	T. Sauka-Spengler	XhoI	SP6	(Fraser and Sauka-Spengler, 2004)
BRACHYURY (T)	V. Cunliffe	XbaI	T3	(Smith et al., 1991)
CBFA2T2 (MTGR1)	N. Koyano-Nakagawa	NotI	T7	(Koyano-Nakagawa and Kintner, 2005)
CCND1	F. Pituello	HindIII	T7	(Lobjois et al., 2004)
CDX1	F. Bertocchini	BamHI	T3	-
CDX2	A. Fainsod	ClaI	T3	(Marom et al., 1997)
CDX4	G. Sheng	ApaI	SP6	(Alev et al., 2010)
DACH1	C. Tabin	SmaI	T7	(Heanue et al., 2002)
DLX3	E. Pera	HindIII	SP6	(Pera and Kessel, 1999)
DLX5	G. Lizarraga	BamHI	T3	(Ferrari et al., 1995)
EOMES	B. Pain	SalI	T7	(Pernaute et al., 2010)
				(Jean et al., 2015)
ERNI	-	KpnI	T3	(Streit et al., 2000)
ETS2 (ETV3)	A. Mey	NheI	T3	(Mey et al., 2012)
ETV1 (ER81)	K. Storey	NotI	T7	(Lunn et al., 2007)
ETV4 (PEA3)	K. Storey	NotI	T7	(Lunn et al., 2007)
EYA2	S. Tomarev	NotI	T7	(Mishima and Tomarev, 1998)
GATA2	-	NdeI	T7	(Sheng and Stern, 1999)
GATA4	B. Pain	ApaI	SP6	(Chapman et al., 2007)
				(Jean et al., 2015)
GATA5	B. Pain	ApaI	SP6	(Chapman et al., 2007)
				(Jean et al., 2015)
GATA6	B. Pain	NcoI	SP6	(Chapman et al., 2007)
				(Jean et al., 2015)
GBX2	A. Streit	BglII	T3	(Shamim and Mason, 1998)
GLI2	J. Briscoe	HindIII	T3	(Marigo et al., 1996)
GLI3	J. Briscoe	EcoRV	T3	(Schweitzer et al., 2000)
HAND1	D. Srivastava	BamHI	T7	(Srivastava et al., 1995)
HESX1	S. Mackem	XhoI	T3	(Hermesz et al., 1996)
HEY1	M. Gessler	EcoRI	T3	(Leimeister et al., 2000)
HNF1B (vHNF1)	C. Pujades	SacII	T7	(Aragon and Pujades, 2009)
HOXB1	V. Prince	XbaI	T7	(Paxton et al., 2010)
ID2	M. Bronner	EcoRI	T7	(Martinsen et al., 2004)
IRX2	T. Ogura	XhoI	T3	(Matsumoto et al., 2004)
KLF2	P. Antin	EcoRI	T7	(Antin et al., 2010)
KLF4	P. Antin	NotI	T3	(Antin et al., 2010)
KLF5	P. Antin	NotI	T3	(Antin et al., 2010)
ChEST429a18
KLF6	P. Antin	NotI	T3	(Antin et al., 2010)
ChEST837d22
LIN28A	B. Pain	ApaI	SP6	(Yokoyama et al., 2008)
				(Jean et al., 2015)
LMO7	D. Burt	NotI	T3	-
ChEST860d14
LMX1B	C. Tabin	SpeI	T7	(Riddle et al., 1995)
MAFA (L-MAF)	H. Ogino	XbaI	T7	(Ogino and Yasuda, 1998)
MSX1	K. Liem	BglII	T3	(Suzuki et al., 1991)
MSX2	C. Tickle	SacI	T7	(Brown et al., 1997)
NANOG	B. Pain	ApaI	SP6	(Lavial et al., 2007)
				(Jean et al., 2015)
NKX6-2	J. Ericson	XbaI	T7	(Pattyn et al., 2003)
NOT1	M. Kessel	EcoRI	T7	(Stein et al., 1996)
NOT2	M. Kessel	HindIII	T7	(Stein et al., 1996)
OTX2	L. Bally-Cuif	XhoI	T3	(Bally-Cuif et al., 1995)
PITX2	M. Levin	PstI	T7	(Zhu et al., 1999)
RUNX1T1 (MTG8)	N. Koyano-Nakagawa	NotI	T7	(Koyano-Nakagawa and Kintner, 2005)
SIX3	P. Bovolenta	ClaI	T3	(Bovolenta et al., 1998)
SMAD6	P. Szendro	XbaI	T7	(Vargesson and Laufer, 2001)
SMAD7	E. Laufer	EcoRI	T3	(Vargesson and Laufer, 2001)
SMAD9 (SMAD8)	J. Hurle	SacI	T7	(Zuzarte-Luis et al., 2004)
SNAI1	ARK Genomics	NotI	T3	(Garcia-Castro et al., 2000)
ChEST366k21
SOX1	H. Kondoh	XhoI	T7	(Kamachi et al., 1998)
SOX11	M. Bronner	BamHI	T3	-
SOX2	P. Scotting	PstI	T7	(Rex et al., 1997)
SOX3	P. Scotting	PstI	T7	(Rex et al., 1997)
SP5	S. Kuratani	EcoRI	T7	(Kuraku et al., 2005)
STOX2	A. Streit	NotI	T3	-
ChEST851g13
TBX3	C. Tickle	XhoI	T3	(Isaac et al., 1998)
TBX6	S. Mackem	XbaI	T7	(Knezevic et al., 1997)
TGIF1	J. Hurle	SacI	T7	(Lorda-Diez et al., 2009)
ZEB2 (SIP1)	-	SacII	SP6	(Sheng et al., 2003)
ZIC2	K. Storey	NcoI	SP6	(Warner et al., 2003)
