# Supplementary material for: A gene regulatory network for neural induction
Source: eLife. 2023 Mar 3;12:e73189. doi: 10.7554/eLife.73189 (PMC10038663; doi:10.7554/eLife.73189)
Supplement: Figure 7—source data 4. [file elife-73189-fig7-data4.xlsx]

## Sheet: Suppl Table S11
Supplementary Table S11. in situ probes by PCR
Gene	Obtained from/Kind gift of	Linearised	Transcribed	Citation
AHR	Source Bioscience	M13F/R	T3	-
ChEST355d19
ARID5B	Source Bioscience	M13F/R	T3	-
ChEST60e17
ATF3	Source Bioscience	M13F/R	T3	-
ChEST425m11
BACH1	Source Bioscience	M13F/R	T3	-
ChEST761e22
BACH2	Source Bioscience	M13F/R	T3	-
ChEST593g13
BHLHE40	Source Bioscience	M13F/R	T3	-
(BHLHB2)
ChEST258o16
CDCA7	Source Bioscience	M13F/R	T3	-
ChEST252j12
CEBPB	Source Bioscience	M13F/R	T7	-
ChEST664e19
CITED4 (CITED3)	Source Bioscience	M13F/R	T3	(Andrews et al., 2000)
ChEST150g1
CREB3L1	Source Bioscience	M13F/R	T3	-
ChEST441l21
CREG1	Source Bioscience	M13F/R	T3	-
ChEST368d4
CRIP2	Source Bioscience	M13F/R	T3	-
ChEST741k5
CSRP2	Source Bioscience	M13F/R	T3	-
ChEST77p7
DMBX1	Source Bioscience	M13F/R	T3	(Ferran et al., 2007)
ChEST244g19
DNMT3A	A. Streit	M13F/R	T3	(Hu et al., 2012)
ChEST425j12
DNMT3B	A. Streit	M13F/R	T3
ChEST405f22
ELF1	Source Bioscience	M13F/R	T3	-
ChEST188c18
ELF3	Source Bioscience	M13F/R	T3	-
ChEST546f17
ENC1	Source Bioscience	M13F/R	T3	-
ChEST689f18
EPAS1 (HIF2A)	G. Sheng	M13F/R	SP6	(Ota et al., 2007)
ESRRG	ARK Genomics	M13F/R	T3	-
ChEST593B16
ETV5 (ERM)	M. Bronner	M13F/R	T3	(Lunn et al., 2007)
ChEST337i4
EZH2	Source Bioscience	M13F/R	T3	-
ChEST511d7
FKHR (FOXO1A)	Source Bioscience	M13F/R	T3	-
ChEST232b16
FOXO3	Source Bioscience	M13F/R	T3	-
ChEST558l10
FRY	Source Bioscience	M13F/R	T3	-
ChEST309m11
GRHL1	Source Bioscience	M13F/R	T3	-
ChEST301e4
GRHL2	Cloned by K. Trevers -see Table S12	M13F/R	T7	-
GRHL3	Source Bioscience	M13F/R	T3	-
ChEST664c10
HIC2	Source Bioscience	M13F/R	T3	-
ChEST902c20
HIPK2	Source Bioscience	M13F/R	T3	-
ChEST436n24
HIVEP2	Source Bioscience	M13F/R	T3	-
ChEST8c12
HIVEP3	Source Bioscience	M13F/R	T3	-
ChEST341h23
HOXA1	Source Bioscience	M13F/R	T3	(McClintock et al., 2003)
ChEST1010d14
HOXA2	Source Bioscience	M13F/R	T3	(Prince and Lumsden, 1994)
ChEST671c8
ID3	ARK Genomics	M13F/R	T3	(Kee and Bronner-Fraser, 2001)
ChEST2M18
ING5	A. Streit	M13F/R	T3	-
ChEST696i13
IRF7 (IRF3)	Source Bioscience	M13F/R	T3	-
ChEST45h21
ISX	Source Bioscience	M13F/R	T3	-
ChEST595l5
IVNS1ABP	Source Bioscience	M13F/R	T3	-
ChEST452o4
JMJD4	Source Bioscience	M13F/R	T3	-
ChEST427j1
KAT2B	Source Bioscience	M13F/R	T3	-
ChEST481p23
KDM4A	Source Bioscience	M13F/R	T3	-
ChEST121j8
LHX5	Source Bioscience	M13F/R	T3	-
ChEST455n21
LIN28B	Source Bioscience	M13F/R	T3	-
ChEST770i7
LMO1	Source Bioscience	M13F/R	T3	-
ChEST410h4
MAML2	Source Bioscience	M13F/R	T3	-
ChEST243a24
MBNL2	Source Bioscience	M13F/R	T3	-
ChEST476i5
MEF2D	Source Bioscience	M13F/R	T3	-
ChEST535j15
MEIS1	Source Bioscience	M13F/R	T3	(Mercader et al., 1999)
ChEST397o24
MEIS2	A. Streit	M13F/R	SP6	(Mercader et al., 1999)
MTA1	Source Bioscience	M13F/R	T3	-
ChEST87a11
MYC (C-MYC)	M. Bronner	M13F/R	T3	(Khudyakov and Bronner-Fraser, 2009)
ChEST895e1
MYCN (N-MYC)	M. Bronner	M13F/R	T3	(Khudyakov and Bronner-Fraser, 2009)
ChEST442N13
NCOA2	Source Bioscience	M13F/R	T3	-
ChEST304i18
NFKBIZ	ARK Genomics	M13F/R	T3	-
ChEST142K1
NKX1-2	Source Bioscience	M13F/R	T3	(Bertrand et al., 2000)
ChEST427n5
NRIP1	Source Bioscience	M13F/R	T3	-
ChEST97g15
NSD1	A. Streit	M13F/R	T3	-
ChEST995e21
OVOL2	Source Bioscience	M13F/R	T3	-
ChEST627k2
PDCD4	Source Bioscience	M13F/R	T3	-
ChEST132g13
PDLIM1	Source Bioscience	M13F/R	T3	-
ChEST982m14
PDLIM4	Source Bioscience	M13F/R	T3	-
ChEST384d10
PDLIM5	Source Bioscience	M13F/R	T3	-
ChEST594j18
PITX3	Source Bioscience	M13F/R	T3	-
ChEST292n23
PPARGC1A	Source Bioscience	M13F/R	T3	-
ChEST999p5
PRDM1 (BLIMP1)	Cloned by K. Trevers -see Table S12	M13F/R	T7	(Ha and Riddle, 2003)
PTRF	Source Bioscience	M13F/R	T3	-
ChEST224k9
RARB	Source Bioscience	M13F/R	T3	-
ChEST392d11
RASSF7	Source Bioscience	M13F/R	T3	-
ChEST733e13
RB1	Source Bioscience	M13F/R	T3	-
ChEST613e5
RFX3	Source Bioscience	M13F/R	T3	-
ChEST399m9
RREB1	ARK Genomics	M13F/R	T3	-
ChEST262i21
SALL1	ARK Genomics	M13F/R	T3	(Sweetman et al., 2005)
ChEST818L4
SCML2	Source Bioscience	M13F/R	T3	-
ChEST818b24
SERTAD2	Source Bioscience	M13F/R	T3	-
ChEST464c24
SETD2	A. Streit	M13F/R	T3	-
ChEST525a17
SMARCA2	Source Bioscience	M13F/R	T3	-
ChEST885f13
SOX13	Source Bioscience	M13F/R	T3	-
ChEST103b23
STOX1	Cloned by K. Trevers -see Table S12	M13F/R	SP6	-
TAF1A	Source Bioscience	M13F/R	T3	-
ChEST580f1
TBL1XR1	Source Bioscience	M13F/R	T3	-
ChEST921d17
TCF12	Source Bioscience	M13F/R	T3	-
ChEST101h2
TCF7L1 (TCF3)	A. Munsterberg	M13F/R	T3	(Schmidt et al., 2004)
TCF7L2 (TCF4)	Source Bioscience	M13F/R	T3	(Hartmann and Tabin, 2000)
ChEST583d9
TFAP2A	Source Bioscience	M13F/R	T3	(Khudyakov and Bronner-Fraser, 2009)
ChEST765g1
TFAP2C	Source Bioscience	M13F/R	T3	(Qiao et al., 2012)
ChEST712l8
TFAP2E	Source Bioscience	M13F/R	T3	-
ChEST104e8
TFCP2L1	Source Bioscience	M13F/R	T3	-
ChEST831a6
TRIM3	Cloned by K. Trevers -see Table S12	M13F/R	T7	-
TRIM9	Source Bioscience	M13F/R	T3	-
ChEST850f24
TRIM24	A. Streit	M13F/R	T3	-
ChEST401k15
VGLL1	Source Bioscience	M13F/R	T3	-
ChEST869b3
WWTR1	Source Bioscience	M13F/R	T3	-
ChEST1024a14
YEATS4 (GAS41)	A. Streit	M13F/R	T3	-
ChEST9i5
ZBTB46	Source Bioscience	M13F/R	T3	-
ChEST22g17
ZFHX3	A. Streit	M13F/R	T3	-
ChEST472L4
ZFPM1	Source Bioscience	M13F/R	T3	-
ChEST999l13
ZIC3	Ark Genomics	M13F/R	T3	-
ChEST289o16
ZMYND11	Source Bioscience	M13F/R	T3	-
ChEST675h24
ZNF185	Source Bioscience	M13F/R	T3	-
ChEST630j23
ZNF423	A. Streit	M13F/R	T3	-
ChEST39g7
ZNF462	A. Streit	M13F/R	T3	-
ChEST236b12
ZNF469	Source Bioscience	M13F/R	T3	-
ChEST231n23
