# Supplementary material for: A gene regulatory network for neural induction
Source: eLife. 2023 Mar 3;12:e73189. doi: 10.7554/eLife.73189 (PMC10038663; doi:10.7554/eLife.73189)
Supplement: Figure 7—source data 5. [file elife-73189-fig7-data5.xlsx]

## Sheet: Suppl Table S12
Supplementary Table S12. PCR primers
Target	ID (galGal4)	Forward Primer 5'-3'	Reverse Primer 5'-3'	Purpose	Coverage	Product Size
PRDM1	ENSGALT00000024824	CAACGTTTGCTCCAAGACCT	TTAGTAACTGGCGAGGCAAC	cDNA for in situ probe	Partial exon 7-3’UTR	958bp
GRHL2	ENSGALT00000022978	TGACCCCACAAGCACACTAT	AGAGAACTGGCTGGGAATCC	cDNA for in situ probe	Partial exons 4-11	924bp
STOX1	ENSGALT00000006552	AGTACCTCGGCTGAAGTGTC	TTGTCACTATCATCACGCGC	cDNA for in situ probe	Partial exons 2-3	998bp
TRIM3	ENSGALT00000029931	CCATCCTCAACCTGGGAGTT	TCCATCCGCATTGTACACCT	cDNA for in situ probe	Partial exons 6-11	1028bp
M13	-	GTAAAACGACGGCCAGT	GCGGATAACAATTTCACACAGG	Linearsing in situ probes	Various	Various
