# Supplementary material for: A gene regulatory network for neural induction
Source: eLife. 2023 Mar 3;12:e73189. doi: 10.7554/eLife.73189 (PMC10038663; doi:10.7554/eLife.73189)
Supplement: Figure 9—source data 1. [file elife-73189-fig9-data1.xlsx]

## Sheet: Suppl Table S13
Supplementary Table S13. Enhancer cloning primers
Putative Enhancer	Active at	Chromosome Location (galGal5)	Size	Forward Primer (5’-3’)	Reverse Primer (5’-3’)	Cloned by
SOX11_enh1	5h	chr3:94817681-94820634	2954bp	CTGAGCGTTGTCATCAGTCT	CGTCACTGTGTAGGTGTTGC	B. Palinkasova
SETD2_enh1	5h	chr2:3958727-3961289	2563bp	GATGCATTGGGACGCAGTAG	GTGACGATTGCTGTCACGG	A-C. Strobl
GLI2_enh1	9h	chr7:26022718-26024968	2251bp	GTGAAGGTCCTGGATGTGGT	GTAAGTGCAGCATGGAGGC	B. Palinkasova
SOX2_enh3	9h	chr9:16883843-16885306	1464bp	GGCATCCCCTCAGCACTG	GTCACCTGGAACACGAGCA	B. Palinkasova
SIX3_enh2	9h	chr3:25787500-25789339	1840bp	GCTAGGAGTGCAGGAGTCAA	TCTGTTCCTCCTTTCCTTCCT	K. Trevers
CDX1_enh1	12h	chr13:13235067-13237864	2798bp	CTTGGTTTGGTGTTGGCTGA	GGAACGCAATGGAACTGACA	K. Trevers
pTK	-	-	Various	GTGCCAGAACATTTCTCTATCG	GTCCAGCTCGACCAGGATG	-
Citrine	-	-	Various	TGTCCCCAGTGCAAGTGC	TAGAACTAAAGACATGCAAATATATTT	-
